# Supplementary material for: Gaps in global wildlife trade monitoring leave amphibians vulnerable
Source: eLife. 2021 Aug 12;10:e70086. doi: 10.7554/eLife.70086 (PMC8425949; doi:10.7554/eLife.70086)
Supplement: Source data 1. [file elife-70086-data1.csv]

lang	engine	page	searchdate	link	reviewdate	sells	allow	type	order	target	method	refine	spages	notes	webID
ENG	Bing	1	2020-08-29 10:21	REDACTED	2020-08-29	1	1	commercial	unk	REDACTED	cycle	NA	5		web001
ENG	Bing	2	2020-08-29 10:21	REDACTED	2020-08-29	1	1	commercial	featured	REDACTED	cycle,level1	NA	5		web002
ENG	Bing	2	2020-08-29 10:21	REDACTED	2020-08-29	1	1	commercial	featured	REDACTED	level1	REDACTED	NA		web003
ENG	Bing	4	2020-08-29 10:21	REDACTED	2020-08-29	1	1	commercial	featured	REDACTED	level1	REDACTED	NA		web004
ENG	Bing	6	2020-08-29 10:22	REDACTED	2020-08-29	1	1	commercial	unk	REDACTED	level1	REDACTED	NA		web005
ENG	Google	1	2020-08-29 10:17	REDACTED	2020-08-29	1	1	commercial wholesale	date	REDACTED	cycle,level1	REDACTED	9		web006
ENG	Google	1	2020-08-29 10:17	REDACTED	2020-08-29	1	1	commercial wholesale	unk	REDACTED	cycle	NA	4		web007
ENG	Google	1	2020-08-29 10:17	REDACTED	2020-08-29	1	NA	commercial	alphabet	REDACTED	single	NA	NA		web008
ENG	Google	1	2020-08-29 10:17	REDACTED	2020-08-29	1	NA	commercial	featured	REDACTED	single	NA	NA		web009
ENG	Google	1	2020-08-29 10:17	REDACTED	2020-08-29	1	1	commercial	popular	REDACTED	level1	REDACTED	NA		web010
ENG	Google	1	2020-08-29 10:17	REDACTED	2020-08-29	1	1	commercial	alphabet	REDACTED	level1	REDACTED	NA		web011
ENG	Google	2	2020-08-29 10:17	REDACTED	2020-08-29	1	1	commercial	unk	REDACTED	level1	NA	NA		web012
ENG	Google	2	2020-08-29 10:17	REDACTED	2020-08-29	1	1	commercial	featured	REDACTED	cycle	NA	2		web013
ENG	Google	2	2020-08-29 10:17	REDACTED	2020-08-29	1	NA	commercial	unk	REDACTED	single	NA	NA		web014
ENG	Google	2	2020-08-29 10:17	REDACTED	2020-08-29	1	1	commercial	alphabet	REDACTED	level2	REDACTED	NA		web015
ENG	Google	2	2020-08-29 10:17	REDACTED	2020-08-29	1	1	commercial wholesale	NA	REDACTED	level2	REDACTED	NA		web016
ENG	Google	3	2020-08-29 10:17	REDACTED	2020-08-29	1	NA	commercial	unk	REDACTED	single	NA	NA		web017
ENG	Google	3	2020-08-29 10:17	REDACTED	2020-08-29	1	NA	commercial	date	REDACTED	single	NA	NA		web018
ENG	Google	3	2020-08-29 10:17	REDACTED	2020-08-29	1	1	classified	date	REDACTED	multiplecycle	NA	59;10;11;100;5		web019
ENG	Google	3	2020-08-29 10:17	REDACTED	2020-08-29	1	NA	commercial	featured	REDACTED	single	NA	NA		web020
ENG	Google	4	2020-08-29 10:17	REDACTED	2020-08-29	1	NA	commercial	unk	REDACTED	single	NA	NA		web021
ENG	Google	4	2020-08-29 10:17	REDACTED	2020-08-29	1	NA	commercial	alphabet	REDACTED	single	NA	NA		web022
ENG	Google	5	2020-08-29 10:18	REDACTED	2020-08-29	1	1	commercial	popular	REDACTED	level1	REDACTED	NA		web023
ENG	Google	7	2020-08-29 10:19	REDACTED	2020-08-29	1	NA	classified	date	REDACTED	single	NA	NA		web024
ENG	Google	7	2020-08-29 10:19	REDACTED	2020-08-29	1	NA	commercial	featured	REDACTED	single	NA	NA		web025
ENG	Google	7	2020-08-29 10:19	REDACTED	2020-08-29	1	NA	commercial	unk	REDACTED	single	NA	NA		web026
ENG	Google	8	2020-08-29 10:19	REDACTED	2020-08-29	1	NA	commercial	price	REDACTED	single	NA	NA		web027
ENG	Google	8	2020-08-29 10:19	REDACTED	2020-08-29	1	1	commercial	price	REDACTED	cycle,level1	REDACTED	3		web028
FRA	Bing	1	2020-08-29 10:25	REDACTED	2020-09-11	1	1	classified	date	REDACTED	single	NA	NA		web029
FRA	Bing	1	2020-08-29 10:25	REDACTED	2020-09-11	1	1	classified	date	REDACTED	cycle	NA	20		web030
FRA	Bing	3	2020-08-29 10:25	REDACTED	2020-09-11	1	NA	classified	date	REDACTED	single	NA	NA		web031
FRA	Bing	5	2020-08-29 10:26	REDACTED	2020-09-11	1	1	classified	date	REDACTED	cycle	NA	15		web032
FRA	Bing	6	2020-08-29 10:26	REDACTED	2020-09-11	1	NA	classified	date	REDACTED	single	NA	NA		web033
FRA	Bing	7	2020-08-29 10:26	REDACTED	2020-09-11	1	NA	commercial	featured	REDACTED	single	NA	NA		web034
FRA	Bing	9	2020-08-29 10:26	REDACTED	2020-09-11	1	NA	commercial	alphabet	REDACTED	single	NA	NA		web035
FRA	Bing	9	2020-08-29 10:26	REDACTED	2020-09-11	1	NA	commercial	alphabet	REDACTED	single	NA	NA		web036
FRA	Bing	9	2020-08-29 10:26	REDACTED	2020-09-11	1	NA	commercial	unk	REDACTED	single	NA	NA		web037
FRA	Bing	10	2020-08-29 10:26	REDACTED	2020-09-11	1	NA	commercial	alphabet	REDACTED	single	NA	NA		web038
FRA	Google	1	2020-08-29 10:23	REDACTED	2020-09-11	1	NA	commercial	alphabet	REDACTED	single	NA	NA		web039
FRA	Google	2	2020-08-29 10:23	REDACTED	2020-09-11	1	1	commercial	unk	REDACTED	multiplecycle	NA	5		web040
FRA	Google	7	2020-08-29 10:24	REDACTED	2020-09-11	1	1	commercial	unk	REDACTED	level1	NA	NA		web041
GER	Bing	1	2020-08-29 10:29	REDACTED	2020-09-11	1	1	classified	popular	REDACTED	cycle	NA	14		web042
GER	Bing	1	2020-08-29 10:29	REDACTED	2020-09-11	1	1	classified	date	REDACTED	cycle	NA	5		web043
GER	Bing	8	2020-08-29 10:30	REDACTED	2020-09-11	1	1	commercial	featured	REDACTED	cycle	NA	16		web044
GER	Google	1	2020-08-29 10:28	REDACTED	2020-09-11	1	1	classified	date	REDACTED	cycle	NA	98	needs to start on zero for complete search, it isn't page by product number start/split	web045
GER	Google	2	2020-08-29 10:28	REDACTED	2020-09-11	1	NA	classified	date	REDACTED	single	NA	NA		web046
GER	Google	2	2020-08-29 10:28	REDACTED	2020-09-11	1	NA	commercial	featured	REDACTED	single	NA	NA		web047
GER	Google	3	2020-08-29 10:28	REDACTED	2020-09-11	1	NA	commercial	featured	REDACTED	single	NA	NA		web048
GER	Google	6	2020-08-29 10:28	REDACTED	2020-09-11	1	NA	commercial	featured	REDACTED	single	NA	NA		web049
GER	Google	7	2020-08-29 10:28	REDACTED	2020-09-11	1	1	classified	date	REDACTED	cycle	NA	14		web050
GER	Google	8	2020-08-29 10:28	REDACTED	2020-09-11	1	1	commercial	unk	REDACTED	level1	REDACTED	NA		web051
GER	Google	8	2020-08-29 10:28	REDACTED	2020-09-11	1	1	commercial	alphabet	REDACTED	level1	REDACTED	NA		web052
GER	Google	8	2020-08-29 10:28	REDACTED	2020-09-11	1	1	commercial	date	REDACTED	level1	REDACTED	NA		web053
JPN	Bing	1	2020-08-29 10:33	REDACTED	2020-09-11	1	1	commercial	unk	REDACTED	level1	REDACTED	NA		web054
JPN	Bing	1	2020-08-29 10:33	REDACTED	2020-09-11	1	1	commercial	unk	REDACTED	level1	REDACTED	NA		web055
JPN	Bing	1	2020-08-29 10:33	REDACTED	2020-09-11	1	1	commercial	unk	REDACTED	multiplecycle	NA	11;2		web056
JPN	Bing	1	2020-08-29 10:33	REDACTED	2020-09-11	1	NA	commercial	featured	REDACTED	single	NA	NA		web057
JPN	Bing	1	2020-08-29 10:33	REDACTED	2020-09-11	1	1	commercial	featured	REDACTED	cycle,level1	REDACTED	5		web058
JPN	Bing	1	2020-08-29 10:33	REDACTED	2020-09-11	1	1	commercial	unk	REDACTED	level1	REDACTED	NA		web059
JPN	Bing	1	2020-08-29 10:33	REDACTED	2020-09-11	1	NA	commercial	unk	REDACTED	single	NA	NA		web060
JPN	Bing	1	2020-08-29 10:33	REDACTED	2020-09-11	1	NA	commercial	alphabet	REDACTED	single	NA	NA		web061
JPN	Bing	5	2020-08-29 10:34	REDACTED	2020-09-11	1	NA	commercial	alphabet	REDACTED	single	NA	NA		web062
JPN	Bing	6	2020-08-29 10:34	REDACTED	2020-09-11	1	NA	commercial	unk	REDACTED	single	NA	NA		web063
JPN	Google	1	2020-08-29 10:31	REDACTED	2020-09-11	1	1	commercial	unk	REDACTED	level1	REDACTED	NA		web064
JPN	Google	1	2020-08-29 10:31	REDACTED	2020-09-11	1	NA	commercial	featured	REDACTED	single	NA	NA		web065
JPN	Google	1	2020-08-29 10:31	REDACTED	2020-09-11	1	1	commercial	featured	REDACTED	level1	REDACTED	NA		web066
JPN	Google	3	2020-08-29 10:31	REDACTED	2020-09-11	1	NA	classified	date	REDACTED	single	NA	NA		web067
JPN	Google	3	2020-08-29 10:31	REDACTED	2020-09-11	1	NA	commercial	unk	REDACTED	single	NA	NA		web068
JPN	Google	3	2020-08-29 10:31	REDACTED	2020-09-11	1	1	commercial	unk	REDACTED	level1	REDACTED	NA		web069
JPN	Google	3	2020-08-29 10:31	REDACTED	2020-09-11	1	1	classified	date	REDACTED	cycle	NA	10		web070
JPN	Google	3	2020-08-29 10:31	REDACTED	2020-09-11	1	1	commercial	date	REDACTED	level1	REDACTED	NA		web071
JPN	Google	4	2020-08-29 10:32	REDACTED	2020-09-11	1	NA	commercial	alphabet	REDACTED	single	NA	NA		web072
JPN	Google	4	2020-08-29 10:32	REDACTED	2020-09-11	1	NA	commercial	unk	REDACTED	single	NA	NA		web073
JPN	Google	5	2020-08-29 10:32	REDACTED	2020-09-11	1	NA	commercial	unk	REDACTED	single	NA	NA		web074
JPN	Google	5	2020-08-29 10:32	REDACTED	2020-09-11	1	1	commercial	unk	REDACTED	cycle	NA	7		web075
JPN	Google	5	2020-08-29 10:32	REDACTED	2020-09-11	1	NA	commercial	unk	REDACTED	single	NA	NA		web076
JPN	Google	5	2020-08-29 10:32	REDACTED	2020-09-11	1	NA	commercial	unk	REDACTED	single	NA	NA		web077
JPN	Google	6	2020-08-29 10:32	REDACTED	2020-09-11	1	NA	commercial	price	REDACTED	single	NA	NA		web078
JPN	Google	6	2020-08-29 10:32	REDACTED	2020-09-11	1	NA	commercial	unk	REDACTED	single	NA	NA		web079
JPN	Google	6	2020-08-29 10:32	REDACTED	2020-09-11	1	1	commercial	unk	REDACTED	level1	REDACTED	NA		web080
JPN	Google	7	2020-08-29 10:32	REDACTED	2020-09-11	1	1	commercial	alphabet	REDACTED	level1	REDACTED	NA		web081
JPN	Google	7	2020-08-29 10:32	REDACTED	2020-09-11	1	NA	commercial	unk	REDACTED	single	NA	NA		web082
JPN	Google	7	2020-08-29 10:32	REDACTED	2020-09-11	1	NA	commercial	unk	REDACTED	single	NA	NA		web083
JPN	Google	8	2020-08-29 10:32	REDACTED	2020-09-11	1	NA	commercial	unk	REDACTED	single	NA	NA		web084
JPN	Google	8	2020-08-29 10:32	REDACTED	2020-09-11	1	NA	commercial	price	REDACTED	single	NA	NA		web085
JPN	Google	9	2020-08-29 10:32	REDACTED	2020-09-11	1	1	commercial	unk	REDACTED	level1	NA	NA		web086
JPN	Google	9	2020-08-29 10:32	REDACTED	2020-09-11	1	1	commercial	unk	REDACTED	cycle	NA	26		web087
JPN	Google	9	2020-08-29 10:32	REDACTED	2020-09-11	1	NA	commercial	unk	REDACTED	single	NA	NA		web088
JPN	Google	10	2020-08-29 10:32	REDACTED	2020-09-11	1	1	commercial	featured	REDACTED	level1	REDACTED	NA		web089
JPN	Google	10	2020-08-29 10:32	REDACTED	2020-09-11	1	NA	commercial	unk	REDACTED	single	NA	NA		web090
JPN	Google	10	2020-08-29 10:32	REDACTED	2020-09-11	1	1	commercial	unk	REDACTED	cycle	NA	4		web091
POR	Google	1	2020-08-29 10:37	REDACTED	2020-09-11	1	NA	commercial	alphabet	REDACTED	single	NA	NA	multiple pages	web092
POR	Google	10	2020-08-29 10:38	REDACTED	2020-09-11	1	NA	commercial	alphabet	REDACTED	single	NA	NA		web093
SPA	Bing	1	2020-08-29 10:42	REDACTED	2020-09-11	1	NA	commercial	featured	REDACTED	single	NA	NA		web094
SPA	Bing	2	2020-08-29 10:42	REDACTED	2020-09-11	1	NA	commercial	price	REDACTED	single	NA	NA		web095
SPA	Bing	4	2020-08-29 10:42	REDACTED	2020-09-11	1	NA	commercial	unk	REDACTED	single	NA	NA		web096
SPA	Bing	5	2020-08-29 10:42	REDACTED	2020-09-11	1	NA	commercial	alphabet	REDACTED	single	NA	NA		web097
SPA	Bing	6	2020-08-29 10:42	REDACTED	2020-09-11	1	NA	commercial	unk	REDACTED	multiplecycle	NA	0;2	pages must start at zero	web098
SPA	Bing	7	2020-08-29 10:42	REDACTED	2020-09-11	1	NA	commercial	unk	REDACTED	single	NA	NA		web099
SPA	Google	2	2020-08-29 10:40	REDACTED	2020-09-11	1	NA	commercial	alphabet	REDACTED	pdf	NA	NA		web100
SPA	Google	4	2020-08-29 10:40	REDACTED	2020-09-11	1	NA	commercial	unk	REDACTED	single	NA	NA		web101
SPA	Google	5	2020-08-29 10:40	REDACTED	2020-09-11	1	NA	commercial	alphabet	REDACTED	single	NA	NA		web102
SPA	Google	9	2020-08-29 10:41	REDACTED	2020-09-11	1	NA	commercial	alphabet	REDACTED	single	NA	NA		web103
ENG	Bing	1	2020-09-11 16:06	REDACTED	2020-09-11	1	1	commercial	alphabet	REDACTED	level2	REDACTED	NA		web104
ENG	Bing	1	2020-09-11 16:06	REDACTED	2020-09-11	1	NA	commercial wholesale	unk	REDACTED	single	NA	NA		web105
ENG	Bing	1	2020-09-11 16:06	REDACTED	2020-09-11	1	1	classified	date	REDACTED	cycle	NA	2		web106
ENG	Bing	2	2020-09-11 16:07	REDACTED	2020-09-11	1	NA	commercial	unk	REDACTED	single	NA	NA		web107
ENG	Bing	2	2020-09-11 16:07	REDACTED	2020-09-11	1	1	commercial	unk	REDACTED	level1	REDACTED	NA		web108
ENG	Bing	4	2020-09-11 16:07	REDACTED	2020-09-11	1	1	commercial	unk	REDACTED	level1	REDACTED	NA		web109
ENG	Bing	4	2020-09-11 16:07	REDACTED	2020-09-11	1	1	commercial wholesale	unk	REDACTED	level2	REDACTED	NA		web110
ENG	Bing	4	2020-09-11 16:07	REDACTED	2020-09-11	1	1	classified	date	REDACTED	cycle	NA	48		web111
ENG	Bing	5	2020-09-11 16:08	REDACTED	2020-09-11	1	1	commercial	unk	REDACTED	level1	REDACTED	NA		web112
ENG	Google	1	2020-09-11 16:25	REDACTED	2020-09-11	1	NA	commercial	unk	REDACTED	single	NA	NA		web113
ENG	Google	2	2020-09-11 16:25	REDACTED	2020-09-11	1	NA	commercial	popular	REDACTED	single	NA	NA		web114
ENG	Google	2	2020-09-11 16:25	REDACTED	2020-09-11	1	1	commercial	unk	REDACTED	level2	REDACTED	NA		web115
ENG	Google	2	2020-09-11 16:25	REDACTED	2020-09-11	1	NA	commercial	featured	REDACTED	single	NA	NA		web116
ENG	Google	2	2020-09-11 16:25	REDACTED	2020-09-11	1	1	commercial	unk	REDACTED	level1	REDACTED	NA		web117
ENG	Google	5	2020-09-11 16:25	REDACTED	2020-09-11	1	1	commercial	date	REDACTED	level1	REDACTED	NA		web118
FRA	Bing	1	2020-09-11 16:09	REDACTED	2020-09-11	1	1	commercial	date	REDACTED	cycle	NA	2		web119
FRA	Bing	2	2020-09-11 16:10	REDACTED	2020-09-11	1	1	commercial	unk	REDACTED	level1	REDACTED	NA		web120
FRA	Google	1	2020-09-11 16:20	REDACTED	2020-09-11	1	NA	commercial	date	REDACTED	single	NA	NA		web121
FRA	Google	2	2020-09-11 16:20	REDACTED	2020-09-11	1	NA	commercial	alphabet	REDACTED	single	NA	NA		web122
FRA	Google	3	2020-09-11 16:20	REDACTED	2020-09-11	1	NA	commercial	alphabet	REDACTED	single	NA	NA		web123
FRA	Google	4	2020-09-11 16:20	REDACTED	2020-09-11	1	NA	commercial	unk	REDACTED	single	NA	NA		web124
GER	Bing	3	2020-09-11 16:13	REDACTED	2020-09-11	1	1	classified	price	REDACTED	cycle	NA	14		web125
GER	Bing	5	2020-09-11 16:14	REDACTED	2020-09-11	1	NA	commercial	unk	REDACTED	single	NA	NA		web126
GER	Google	3	2020-09-11 16:21	REDACTED	2020-09-11	1	NA	commercial	price	REDACTED	single	NA	NA		web127
GER	Google	5	2020-09-11 16:21	REDACTED	2020-09-11	1	NA	commercial	alphabet	REDACTED	pdf	NA	NA		web128
JPN	Bing	2	2020-09-11 16:15	REDACTED	2020-09-11	1	NA	commercial	unk	REDACTED	single	NA	NA		web129
JPN	Bing	3	2020-09-11 16:16	REDACTED	2020-09-11	1	NA	commercial	unk	REDACTED	level1	REDACTED	NA		web130
JPN	Bing	4	2020-09-11 16:16	REDACTED	2020-09-12	1	NA	commercial	unk	REDACTED	single	NA	NA		web131
JPN	Bing	5	2020-09-11 16:16	REDACTED	2020-09-12	1	NA	commercial	unk	REDACTED	single	NA	NA		web132
JPN	Google	1	2020-09-11 16:22	REDACTED	2020-09-12	1	NA	commercial	price	REDACTED	single	NA	NA		web133
JPN	Google	3	2020-09-11 16:22	REDACTED	2020-09-12	1	NA	commercial	unk	REDACTED	single	NA	NA		web134
JPN	Google	4	2020-09-11 16:22	REDACTED	2020-09-12	1	NA	commercial	unk	REDACTED	single	NA	NA		web135
JPN	Google	5	2020-09-11 16:23	REDACTED	2020-09-12	1	NA	commercial	unk	REDACTED	single	NA	NA		web136
SPA	Google	1	2020-09-11 16:24	REDACTED	2020-09-12	1	1	commercial	alphabet	REDACTED	cycle	NA	9		web137
SPA	Google	4	2020-09-11 16:24	REDACTED	2020-09-12	1	NA	commercial	unk	REDACTED	single	NA	NA		web138
SPA	Google	4	2020-09-11 16:24	REDACTED	2020-09-12	1	1	commercial	unk	REDACTED	cycle	NA	2		web139
