# Supplementary material for: Gaps in global wildlife trade monitoring leave amphibians vulnerable
Source: eLife. 2021 Aug 12;10:e70086. doi: 10.7554/eLife.70086 (PMC8425949; doi:10.7554/eLife.70086)
Supplement: Source data 2. [file elife-70086-data2.csv]

order	family	subfamily	genus	subgenus	species	common_name	gaa_name	synonymies	itis_names	iucn	isocc	intro_isocc	aweb_uid	uri/guid	taxon_notes_public
Anura	Allophrynidae		Allophryne		relicta						BR		8097	https://amphibiaweb.org/species/8097
Anura	Allophrynidae		Allophryne		resplendens						PE		7786	https://amphibiaweb.org/species/7786
Anura	Allophrynidae		Allophryne		ruthveni	Tukeit-Hill Frog	Allophryne ruthveni	Sphaenorhynchus seabrai, Sphoenohyla seabrai	Sphaenorhynchus seabrai, Sphoenohyla seabrai	Least Concern (LC)	VE,SR,GY,GF,BR		2059	https://amphibiaweb.org/species/2059
Anura	Alsodidae		Alsodes		australis		Alsodes australis			Data Deficient (DD)	CL,AR		5715	https://amphibiaweb.org/species/5715
Anura	Alsodidae		Alsodes		barrioi		Alsodes barrioi			Endangered (EN)	CL		2552	https://amphibiaweb.org/species/2552
Anura	Alsodidae		Alsodes		cantillanensis		Alsodes cantillanensis			Critically Endangered (CR)	CL		8311	https://amphibiaweb.org/species/8311
Anura	Alsodidae		Alsodes		coppingeri			Eupsophus coppingeri	Eupsophus coppingeri		CL		7307	https://amphibiaweb.org/species/7307
Anura	Alsodidae		Alsodes		gargola		Alsodes gargola			Least Concern (LC)	AR,CL		2553	https://amphibiaweb.org/species/2553
Anura	Alsodidae		Alsodes		hugoi		Alsodes hugoi			Data Deficient (DD)	CL		5836	https://amphibiaweb.org/species/5836
Anura	Alsodidae		Alsodes		igneus		Alsodes igneus			Data Deficient (DD)	CL		6427	https://amphibiaweb.org/species/6427
Anura	Alsodidae		Alsodes		kaweshkari		Alsodes kaweshkari			Data Deficient (DD)	CL		5716	https://amphibiaweb.org/species/5716
Anura	Alsodidae		Alsodes		montanus		Alsodes montanus	Telmatobius montanus	Telmatobius montanus	Vulnerable (VU)	AR,CL		2555	https://amphibiaweb.org/species/2555
Anura	Alsodidae		Alsodes		monticola		Alsodes monticola	Eupsophus monticola	Eupsophus monticola	Data Deficient (DD)	CL		2556	https://amphibiaweb.org/species/2556
Anura	Alsodidae		Alsodes		neuquensis						AR		7893	https://amphibiaweb.org/species/7893
Anura	Alsodidae		Alsodes		nodosus		Alsodes nodosus	Eupsophus illotus, Eupsophus nodosus	Eupsophus illotus, Eupsophus nodosus	Near Threatened (NT)	AR,CL		2557	https://amphibiaweb.org/species/2557
Anura	Alsodidae		Alsodes		norae		Alsodes norae			Endangered (EN)	CL		7115	https://amphibiaweb.org/species/7115
Anura	Alsodidae		Alsodes		pehuenche		Alsodes pehuenche			Critically Endangered (CR)	AR,CL		2558	https://amphibiaweb.org/species/2558
Anura	Alsodidae		Alsodes		tumultuosus		Alsodes tumultuosus			Vulnerable (VU)	CL		2559	https://amphibiaweb.org/species/2559
Anura	Alsodidae		Alsodes		valdiviensis		Alsodes valdiviensis			Data Deficient (DD)	CL		6428	https://amphibiaweb.org/species/6428
Anura	Alsodidae		Alsodes		vanzolinii	Vanzolini's Spiny-Chest Frog	Alsodes vanzolinii			Critically Endangered (CR)	CL		2560	https://amphibiaweb.org/species/2560
Anura	Alsodidae		Alsodes		verrucosus		Alsodes verrucosus			Data Deficient (DD)	AR,CL		2561	https://amphibiaweb.org/species/2561
Anura	Alsodidae		Alsodes		vittatus		Alsodes vittatus			Data Deficient (DD)	CL		2562	https://amphibiaweb.org/species/2562
Anura	Alsodidae		Eupsophus		calcaratus		Eupsophus calcaratus	Zachaenus roseus		Least Concern (LC)	CL		2625	https://amphibiaweb.org/species/2625
Anura	Alsodidae		Eupsophus		emiliopugini		Eupsophus emiliopugini			Least Concern (LC)	CL		2627	https://amphibiaweb.org/species/2627
Anura	Alsodidae		Eupsophus		insularis		Eupsophus insularis			Critically Endangered (CR)	CL		2628	https://amphibiaweb.org/species/2628
Anura	Alsodidae		Eupsophus		migueli	Miguel's Toad	Eupsophus migueli	Eupsophus altor		Endangered (EN)	CL		2629	https://amphibiaweb.org/species/2629
Anura	Alsodidae		Eupsophus		roseus		Eupsophus roseus	Eupsophus contulmoensis, Eupsophus nahuelbutensis, Eupsophus septentrionalis, Eupsophus sylvestris, Cystignathus roseus, Cystignathus sylvestris	Eupsophus sylvestris, Cystignathus roseus, Cystignathus sylvestris	Near Threatened (NT)	CL,AR		2631	https://amphibiaweb.org/species/2631
Anura	Alsodidae		Eupsophus		vertebralis		Eupsophus vertebralis			Near Threatened (NT)	CL		2632	https://amphibiaweb.org/species/2632
Anura	Alsodidae		Limnomedusa		macroglossa		Limnomedusa macroglossa	Limnomedusa misionis, Cystignathus macroglossus, Litopleura maritimum	Limnomedusa misionis, Cystignathus macroglossus, Litopleura maritimum	Least Concern (LC)	UY,BR,AR		2649	https://amphibiaweb.org/species/2649
Anura	Alytidae	Alytinae	Alytes		almogavarii	Catalonian Midwife Toad					FR,ES		9138	https://amphibiaweb.org/species/9138
Anura	Alytidae	Alytinae	Alytes	Ammoryctis	cisternasii	Iberian Midwife Toad, Ibersiche geburtshelferkroete, Gripau paridor ibÃƒÂ¨rec, Iberisk FÃƒÂ¸dselshjÃƒÂ¦lperfrÃƒÂ¸, Ibeeria kÃƒÂ¶idikkonn, sapo partero ibÃƒÂ©rico, sapo partero de cisternas, Apotzar, Alyte de cisternas,	Alytes cisternasii			Near Threatened (NT)	ES,PT		1519	https://amphibiaweb.org/species/1519
Anura	Alytidae	Alytinae	Alytes	Baleaphryne	dickhilleni	Midwife Toad of Hillenius, Betic midwife toad, sapo partero bÃƒÂ©tico, sapo-parteiro-bÃƒÂ©tico	Alytes dickhilleni			Vulnerable (VU)	ES		1520	https://amphibiaweb.org/species/1520
Anura	Alytidae	Alytinae	Alytes	Baleaphryne	maurus	Moroccan Midwife Toad	Alytes maurus			Near Threatened (NT)	DZ,MA		6244	https://amphibiaweb.org/species/6244
Anura	Alytidae	Alytinae	Alytes	Baleaphryne	muletensis	Mallorcan Midwife Toad, Ferreret, Balearenkroete, Baleaari kÃƒÂ¶idikkonn, Sapilo Balear, Alyte de Majorque, Alyte Balearico, Rospo Ostetrico Balearico, balearen vroedmeesterpad	Alytes muletensis			Vulnerable (VU)	ES		1521	https://amphibiaweb.org/species/1521
Anura	Alytidae	Alytinae	Alytes	Alytes	obstetricans	Midwife Toad, TÃƒÂ²til, Gripau llevador, FÃƒÂ¸dselshjÃƒÂ¦lperfrÃƒÂ¸, geburtshelferkroete, glockenfrosch, harilik kÃƒÂ¶idikkonn, sapo partero comÃƒÂ¹n, txantxiku arrunta, alyte accoucheur, crapaud accroucheur, sapo part	Alytes obstetricans			Least Concern (LC)	BE,FR,DE,IT,LU,NL,PT,ES,CH,GB	GB	1522	https://amphibiaweb.org/species/1522
Anura	Alytidae	Discoglossinae	Discoglossus		galganoi	Iberian painted frog, Sapillo Pintojo, Sapinho Sarapintado, Discoglosse de Galgano, Discoglosso di Galgano, Discoglosso Iberico, RÃƒÂ¢-de-focinho-pontiagudo, Iberischer ScheibenzÃƒÂ¼ngler, Iberische schijftongkikker	Discoglossus galganoi	Discoglossus jeanneae		Least Concern (LC)	ES,PT		5581	https://amphibiaweb.org/species/5581
Anura	Alytidae	Discoglossinae	Discoglossus		montalentii	Corsican painted frog, Discoglosse corse, Corsischer scheibenzÃƒÂ¼ngler, Korsika ketaskeelkonn, Discoglosso di Montalenti, Discoglosso cÃƒÂ´rso, Corsicaanse Schijftongkikker	Discoglossus montalentii	Discoglossus montalenti	Discoglossus montalenti	Near Threatened (NT)	FR		1525	https://amphibiaweb.org/species/1525
Anura	Alytidae	Discoglossinae	Discoglossus		pictus	Painted frog, Discoglosse peint, Gemalter scheibenzÃƒÂ¼ngler, Sapillo pintojo, Rana dipinta, Granota pintada, Gripau granoter, Malet frÃƒÂ¸, Kirju ketaskeelkonn, Apo pintatua, Discoglosso dipinto, Schijftongkikker, Kirjosammakko, Skivtunggroda	Discoglossus pictus			Least Concern (LC)	DZ,FR,IT,MT,MA,ES,TN		1527	https://amphibiaweb.org/species/1527
Anura	Alytidae	Discoglossinae	Discoglossus		sardus	Tyrrhenian painted frog, Discoglosse sarde, Sardischer scheibenzÃƒÂ¼ngler, Sapillo pintojo de CerdeÃƒÂ±a, Thyrrensk Malet frÃƒÂ¸, Sardi ketaskeelkonn, Discoglosso sardo, Discoglosso tirrenico, Sardijnse Schijftongkikker, Tyrrhenankirjosammako, Tyrrensk Skivtunggro	Discoglossus sardus			Least Concern (LC)	IT,FR		1528	https://amphibiaweb.org/species/1528
Anura	Alytidae	Discoglossinae	Discoglossus		scovazzi	Moroccan Painted Frog	Discoglossus scovazzi			Least Concern (LC)	DZ,MA,ES		6554	https://amphibiaweb.org/species/6554
Anura	Alytidae	Discoglossinae	Latonia		nigriventer	Hula Painted Frog, Palestinian Painted Frog	Latonia nigriventer			Critically Endangered (CR)	IL		1526	https://amphibiaweb.org/species/1526
Anura	Arthroleptidae		Arthroleptis		adelphus		Arthroleptis adelphus			Least Concern (LC)	CM,GA		1425	https://amphibiaweb.org/species/1425
Anura	Arthroleptidae		Arthroleptis		adolfifriederici		Arthroleptis adolfifriederici			Least Concern (LC)	MW,TZ,KE,UG,BI,RW,CD		1426	https://amphibiaweb.org/species/1426
Anura	Arthroleptidae		Arthroleptis		affinis		Arthroleptis affinis	Arthroleptis schoenebecki	Arthroleptis schoenebecki	Least Concern (LC)	TZ		1427	https://amphibiaweb.org/species/1427
Anura	Arthroleptidae		Arthroleptis		anotis		Arthroleptis anotis			Data Deficient (DD)	TZ		7881	https://amphibiaweb.org/species/7881
Anura	Arthroleptidae		Arthroleptis		aureoli		Arthroleptis aureoli			Endangered (EN)	SL		1438	https://amphibiaweb.org/species/1438
Anura	Arthroleptidae		Arthroleptis		bioko	Bioko Squeaker Frog	Arthroleptis bioko			Endangered (EN)	GQ		7529	https://amphibiaweb.org/species/7529
Anura	Arthroleptidae		Arthroleptis		bivittatus		Arthroleptis bivittatus			Data Deficient (DD)	GN,SL,CD		1428	https://amphibiaweb.org/species/1428
Anura	Arthroleptidae		Arthroleptis		brevipes		Arthroleptis brevipes			Data Deficient (DD)	TG		1429	https://amphibiaweb.org/species/1429
Anura	Arthroleptidae		Arthroleptis		carquejai		Arthroleptis carquejai			Data Deficient (DD)	AO		1430	https://amphibiaweb.org/species/1430
Anura	Arthroleptidae		Arthroleptis		crusculum	Guinea Screeching Frog	Arthroleptis crusculum	Schoutedenella crusculum	Schoutedenella crusculum	Near Threatened (NT)	GN		5889	https://amphibiaweb.org/species/5889
Anura	Arthroleptidae		Arthroleptis		discodactylus		Arthroleptis schubotzi	Arthroleptis schubotzi		Least Concern (LC)	CD		1456	https://amphibiaweb.org/species/1456
Anura	Arthroleptidae		Arthroleptis		fichika	Hidden Squeaker Frog	Arthroleptis fichika			Endangered (EN)	TZ		7309	https://amphibiaweb.org/species/7309
Anura	Arthroleptidae		Arthroleptis		formosus		Arthroleptis formosus			Data Deficient (DD)	GN		7706	https://amphibiaweb.org/species/7706
Anura	Arthroleptidae		Arthroleptis		francei	France's squeaker	Arthroleptis francei			Vulnerable (VU)	MW,MZ		1431	https://amphibiaweb.org/species/1431
Anura	Arthroleptidae		Arthroleptis		hematogaster		Arthroleptis hematogaster	Schoutedenella hematogaster	Schoutedenella hematogaster	Data Deficient (DD)	CD		5821	https://amphibiaweb.org/species/5821
Anura	Arthroleptidae		Arthroleptis		kidogo	Tiny Squeaker Frog	Arthroleptis kidogo			Critically Endangered (CR)	TZ		7310	https://amphibiaweb.org/species/7310
Anura	Arthroleptidae		Arthroleptis		krokosua		Arthroleptis krokosua			Near Threatened (NT)	GH		7095	https://amphibiaweb.org/species/7095
Anura	Arthroleptidae		Arthroleptis		kutogundua		Arthroleptis kutogundua			Critically Endangered (CR)	TZ		7827	https://amphibiaweb.org/species/7827
Anura	Arthroleptidae		Arthroleptis		lameerei		Arthroleptis lameerei	Schoutedenella lameerei, Schoutedenella muta	Schoutedenella lameerei, Schoutedenella muta	Least Concern (LC)	CD,BI,AO		1458	https://amphibiaweb.org/species/1458
Anura	Arthroleptidae		Arthroleptis		langeri		Arthroleptis langeri			Data Deficient (DD)	LR		7399	https://amphibiaweb.org/species/7399
Anura	Arthroleptidae		Arthroleptis		lonnbergi		Arthroleptis lonnbergi			Data Deficient (DD)	KE,TZ		7293	https://amphibiaweb.org/species/7293
Anura	Arthroleptidae		Arthroleptis		loveridgei		Arthroleptis loveridgei	Schoutedenella loveridgei	Schoutedenella loveridgei	Data Deficient (DD)	CD		1459	https://amphibiaweb.org/species/1459
Anura	Arthroleptidae		Arthroleptis		mossoensis		Arthroleptis mossoensis	Schoutedenella mossoensis	Schoutedenella mossoensis	Data Deficient (DD)	BI		1461	https://amphibiaweb.org/species/1461
Anura	Arthroleptidae		Arthroleptis		nguruensis		Arthroleptis nguruensis			Vulnerable (VU)	TZ		7272	https://amphibiaweb.org/species/7272
Anura	Arthroleptidae		Arthroleptis		nikeae	NikeÃ¢â‚¬â„¢s squeaker frog	Arthroleptis nikeae	Arthroleptis schoenebecki	Arthroleptis schoenebecki	Critically Endangered (CR)	TZ		6247	https://amphibiaweb.org/species/6247
Anura	Arthroleptidae		Arthroleptis		nimbaensis		Arthroleptis nimbaensis	Schoutedenella nimbaensis	Schoutedenella nimbaensis	Data Deficient (DD)	GN		1462	https://amphibiaweb.org/species/1462
Anura	Arthroleptidae		Arthroleptis		nlonakoensis		Arthroleptis nlonakoensis			Endangered (EN)	CM		6863	https://amphibiaweb.org/species/6863
Anura	Arthroleptidae		Arthroleptis		palava	Problem Squeaker Frog	Arthroleptis palava			Least Concern (LC)	CM,NG		7528	https://amphibiaweb.org/species/7528
Anura	Arthroleptidae		Arthroleptis		perreti		Arthroleptis perreti			Endangered (EN)	CM		7253	https://amphibiaweb.org/species/7253
Anura	Arthroleptidae		Arthroleptis		phrynoides		Arthroleptis phrynoides	Schoutedenella phrynoides	Schoutedenella phrynoides	Data Deficient (DD)	CD		1463	https://amphibiaweb.org/species/1463
Anura	Arthroleptidae		Arthroleptis		poecilonotus		Arthroleptis poecilonotus			Least Concern (LC)	BJ,CM,CG,CD,CI,GQ,GA,GH,GN,GW,LR,NG,SS,TG,UG		1464	https://amphibiaweb.org/species/1464
Anura	Arthroleptidae		Arthroleptis		pyrrhoscelis		Arthroleptis pyrrhoscelis	Schoutedenella pyrrhoscelis	Schoutedenella pyrrhoscelis	Least Concern (LC)	CD		1465	https://amphibiaweb.org/species/1465
Anura	Arthroleptidae		Arthroleptis		reichei	Poroto Screeching Frog, Reiche's squeaker	Arthroleptis reichei			Least Concern (LC)	MW,TZ		5888	https://amphibiaweb.org/species/5888
Anura	Arthroleptidae		Arthroleptis		schubotzi		Arthroleptis schubotzi	Schoutedenella discodactyla, Schoutedenella schubotzi	Schoutedenella discodactyla, Schoutedenella schubotzi	Least Concern (LC)	CD,RW,BI		1466	https://amphibiaweb.org/species/1466
Anura	Arthroleptidae		Arthroleptis		spinalis		Arthroleptis spinalis	Schoutedenella spinalis	Schoutedenella spinalis	Data Deficient (DD)	CD		1467	https://amphibiaweb.org/species/1467
Anura	Arthroleptidae		Arthroleptis		stenodactylus	Common Squeaker, Shovel Footed Squeaker, Dune Squeaker, Savanna Squeaking Frog	Arthroleptis stenodactylus			Least Concern (LC)	AO,BW,CD,KE,MW,MZ,ZA,TZ,ZM,ZW		1432	https://amphibiaweb.org/species/1432
Anura	Arthroleptidae		Arthroleptis		stridens		Arthroleptis stridens			Data Deficient (DD)	TZ		6946	https://amphibiaweb.org/species/6946
Anura	Arthroleptidae		Arthroleptis		sylvaticus		Arthroleptis sylvaticus	Schoutedenella sylvatica	Schoutedenella sylvatica	Least Concern (LC)	CM,CF,CG,CD,GA		1468	https://amphibiaweb.org/species/1468
Anura	Arthroleptidae		Arthroleptis		taeniatus		Arthroleptis taeniatus			Least Concern (LC)	CM,GA		1469	https://amphibiaweb.org/species/1469
Anura	Arthroleptidae		Arthroleptis		tanneri		Arthroleptis tanneri	Arthroleptis schoenebecki	Arthroleptis schoenebecki	Endangered (EN)	TZ		1433	https://amphibiaweb.org/species/1433
Anura	Arthroleptidae		Arthroleptis		troglodytes		Arthroleptis troglodytes	Schoutedenella troglodytes	Schoutedenella troglodytes	Critically Endangered (CR)	ZW		1470	https://amphibiaweb.org/species/1470
Anura	Arthroleptidae		Arthroleptis		tuberosus		Arthroleptis tuberosus			Data Deficient (DD)	CM		1434	https://amphibiaweb.org/species/1434
Anura	Arthroleptidae		Arthroleptis		variabilis		Arthroleptis variabilis			Least Concern (LC)	CM,CF,CG,CD,CI,GQ,GA,GH,GN,LR,NG		1435	https://amphibiaweb.org/species/1435
Anura	Arthroleptidae		Arthroleptis		vercammeni		Arthroleptis vercammeni	Schoutedenella vercammeni	Schoutedenella vercammeni	Data Deficient (DD)	CD		1471	https://amphibiaweb.org/species/1471
Anura	Arthroleptidae		Arthroleptis		wageri	Wager's Bush Squeaker					ZA		8931	https://amphibiaweb.org/species/8931
Anura	Arthroleptidae		Arthroleptis		wahlbergii	Bush squeaker	Arthroleptis wahlbergii			Least Concern (LC)	ZA		1436	https://amphibiaweb.org/species/1436
Anura	Arthroleptidae		Arthroleptis		xenochirus	Plain squeaker	Arthroleptis xenochirus	Schoutedenella xenochirus	Schoutedenella xenochirus	Least Concern (LC)	AO,CD,MW,TZ,ZM		1473	https://amphibiaweb.org/species/1473
Anura	Arthroleptidae		Arthroleptis		xenodactyloides	Dwarf squeaker	Arthroleptis xenodactyloides	Schoutedenella xenodactyloides	Schoutedenella xenodactyloides	Least Concern (LC)	MZ,TZ,ZM,ZW		1474	https://amphibiaweb.org/species/1474
Anura	Arthroleptidae		Arthroleptis		xenodactylus		Arthroleptis xenodactylus	Schoutedenella xenodactyla	Schoutedenella xenodactyla	Endangered (EN)	TZ		1475	https://amphibiaweb.org/species/1475
Anura	Arthroleptidae		Arthroleptis		zimmeri		Arthroleptis zimmeri	Schoutedenella zimmeri	Schoutedenella zimmeri	Data Deficient (DD)	GH		1476	https://amphibiaweb.org/species/1476
Anura	Arthroleptidae		Astylosternus		batesi		Astylosternus batesi			Least Concern (LC)	CM,CF,CG,CD,GQ,GA		1479	https://amphibiaweb.org/species/1479
Anura	Arthroleptidae		Astylosternus		diadematus		Astylosternus diadematus			Least Concern (LC)	CM,NG		1481	https://amphibiaweb.org/species/1481
Anura	Arthroleptidae		Astylosternus		fallax		Astylosternus fallax			Vulnerable (VU)	CM		1482	https://amphibiaweb.org/species/1482
Anura	Arthroleptidae		Astylosternus		laticephalus		Astylosternus laticephalus			Near Threatened (NT)	CI,GH		7790	https://amphibiaweb.org/species/7790
Anura	Arthroleptidae		Astylosternus		laurenti		Astylosternus laurenti			Endangered (EN)	CM		1483	https://amphibiaweb.org/species/1483
Anura	Arthroleptidae		Astylosternus		montanus		Astylosternus montanus			Least Concern (LC)	CM,NG		1484	https://amphibiaweb.org/species/1484
Anura	Arthroleptidae		Astylosternus		nganhanus		Astylosternus nganhanus			Critically Endangered (CR)	CM		1485	https://amphibiaweb.org/species/1485
Anura	Arthroleptidae		Astylosternus		occidentalis		Astylosternus occidentalis			Least Concern (LC)	CI,GN,LR,SL		1486	https://amphibiaweb.org/species/1486
Anura	Arthroleptidae		Astylosternus		perreti		Astylosternus perreti			Endangered (EN)	CM		1487	https://amphibiaweb.org/species/1487
Anura	Arthroleptidae		Astylosternus		ranoides		Astylosternus ranoides			Endangered (EN)	CM		1488	https://amphibiaweb.org/species/1488
Anura	Arthroleptidae		Astylosternus		rheophilus		Astylosternus rheophilus			Near Threatened (NT)	CM		1489	https://amphibiaweb.org/species/1489
Anura	Arthroleptidae		Astylosternus		schioetzi		Astylosternus schioetzi			Endangered (EN)	CM		1490	https://amphibiaweb.org/species/1490
Anura	Arthroleptidae		Cardioglossa		alsco		Cardioglossa alsco			Endangered (EN)	CM		6548	https://amphibiaweb.org/species/6548
Anura	Arthroleptidae		Cardioglossa		annulata	Annulated long-fingered frog					CG	,CG	8378	https://amphibiaweb.org/species/8378
Anura	Arthroleptidae		Cardioglossa		congolia	Congolian Long-Fingered Frog					CD		8379	https://amphibiaweb.org/species/8379
Anura	Arthroleptidae		Cardioglossa		cyaneospila		Cardioglossa cyaneospila			Near Threatened (NT)	CD,BI,RW		1439	https://amphibiaweb.org/species/1439
Anura	Arthroleptidae		Cardioglossa		elegans		Cardioglossa elegans			Least Concern (LC)	CM		1441	https://amphibiaweb.org/species/1441
Anura	Arthroleptidae		Cardioglossa		escalerae		Cardioglossa escalerae			Least Concern (LC)	CM,CF,CG,CD		1442	https://amphibiaweb.org/species/1442
Anura	Arthroleptidae		Cardioglossa		gracilis		Cardioglossa gracilis			Least Concern (LC)	CM,CF,CD,GQ,GA,NG		1443	https://amphibiaweb.org/species/1443
Anura	Arthroleptidae		Cardioglossa		gratiosa		Cardioglossa gratiosa			Least Concern (LC)	CM,GA		1444	https://amphibiaweb.org/species/1444
Anura	Arthroleptidae		Cardioglossa		inornata		Cardioglossa inornata			Data Deficient (DD)	CD		8380	https://amphibiaweb.org/species/8380
Anura	Arthroleptidae		Cardioglossa		leucomystax		Cardioglossa leucomystax			Least Concern (LC)	CM,CG,CD,CI,GQ,GA,GH,GN,LR,NG		1445	https://amphibiaweb.org/species/1445
Anura	Arthroleptidae		Cardioglossa		manengouba		Cardioglossa manengouba			Critically Endangered (CR)	CM		7207	https://amphibiaweb.org/species/7207
Anura	Arthroleptidae		Cardioglossa		melanogaster		Cardioglossa melanogaster			Vulnerable (VU)	CM,NG		1447	https://amphibiaweb.org/species/1447
Anura	Arthroleptidae		Cardioglossa		nigromaculata		Cardioglossa nigromaculata			Least Concern (LC)	CM,NG		1448	https://amphibiaweb.org/species/1448
Anura	Arthroleptidae		Cardioglossa		occidentalis	Western long-fingered frog					CI,GH,GN,LR,SL		7231	https://amphibiaweb.org/species/7231
Anura	Arthroleptidae		Cardioglossa		oreas		Cardioglossa oreas			Endangered (EN)	CM		1449	https://amphibiaweb.org/species/1449
Anura	Arthroleptidae		Cardioglossa		pulchra		Cardioglossa pulchra			Endangered (EN)	CM,NG		1450	https://amphibiaweb.org/species/1450
Anura	Arthroleptidae		Cardioglossa		schioetzi		Cardioglossa schioetzi			Vulnerable (VU)	NG,CM		1451	https://amphibiaweb.org/species/1451
Anura	Arthroleptidae		Cardioglossa		trifasciata		Cardioglossa trifasciata			Critically Endangered (CR)	CM		1452	https://amphibiaweb.org/species/1452
Anura	Arthroleptidae		Cardioglossa		venusta		Cardioglossa venusta			Endangered (EN)	CM		1453	https://amphibiaweb.org/species/1453
Anura	Arthroleptidae		Leptodactylodon		albiventris		Leptodactylodon albiventris			Endangered (EN)	CM		1492	https://amphibiaweb.org/species/1492
Anura	Arthroleptidae		Leptodactylodon		axillaris		Leptodactylodon axillaris			Critically Endangered (CR)	CM		1493	https://amphibiaweb.org/species/1493
Anura	Arthroleptidae		Leptodactylodon		bicolor		Leptodactylodon bicolor			Near Threatened (NT)	CM,NG		1494	https://amphibiaweb.org/species/1494
Anura	Arthroleptidae		Leptodactylodon		blanci		Leptodactylodon blanci			Data Deficient (DD)	GA		5477	https://amphibiaweb.org/species/5477
Anura	Arthroleptidae		Leptodactylodon		boulengeri		Leptodactylodon boulengeri			Near Threatened (NT)	CM		1495	https://amphibiaweb.org/species/1495
Anura	Arthroleptidae		Leptodactylodon		bueanus		Leptodactylodon bueanus			Endangered (EN)	CM		6546	https://amphibiaweb.org/species/6546
Anura	Arthroleptidae		Leptodactylodon		erythrogaster		Leptodactylodon erythrogaster			Critically Endangered (CR)	CM		1496	https://amphibiaweb.org/species/1496
Anura	Arthroleptidae		Leptodactylodon		mertensi		Leptodactylodon mertensi			Endangered (EN)	CM		1497	https://amphibiaweb.org/species/1497
Anura	Arthroleptidae		Leptodactylodon		ornatus		Leptodactylodon ornatus			Endangered (EN)	CM		1498	https://amphibiaweb.org/species/1498
Anura	Arthroleptidae		Leptodactylodon		ovatus		Leptodactylodon ovatus			Least Concern (LC)	NG,CM		1499	https://amphibiaweb.org/species/1499
Anura	Arthroleptidae		Leptodactylodon		perreti		Leptodactylodon perreti			Endangered (EN)	CM		1500	https://amphibiaweb.org/species/1500
Anura	Arthroleptidae		Leptodactylodon		polyacanthus		Leptodactylodon polyacanthus			Vulnerable (VU)	CM		1501	https://amphibiaweb.org/species/1501
Anura	Arthroleptidae		Leptodactylodon		stevarti		Leptodactylodon stevarti	Leptodactylodon stevartsi	Leptodactylodon stevartsi	Endangered (EN)	GA		6249	https://amphibiaweb.org/species/6249
Anura	Arthroleptidae		Leptodactylodon		ventrimarmoratus		Leptodactylodon ventrimarmoratus			Vulnerable (VU)	CM		1502	https://amphibiaweb.org/species/1502
Anura	Arthroleptidae		Leptodactylodon		wildi		Leptodactylodon wildi			Critically Endangered (CR)	CM		6547	https://amphibiaweb.org/species/6547
Anura	Arthroleptidae		Leptopelis		anchietae		Leptopelis anchietae			Least Concern (LC)	AO		3632	https://amphibiaweb.org/species/3632
Anura	Arthroleptidae		Leptopelis		anebos	Young Itombwe Forest Treefrog	Leptopelis anebos			Endangered (EN)	CD		8135	https://amphibiaweb.org/species/8135
Anura	Arthroleptidae		Leptopelis		argenteus	Silvery Tree Frog	Leptopelis argenteus	Hylambates argenteus	Hylambates argenteus	Least Concern (LC)	KE,MW,MZ,TZ,ZW		3633	https://amphibiaweb.org/species/3633
Anura	Arthroleptidae		Leptopelis		aubryi		Leptopelis aubryi			Least Concern (LC)	CM,CF,CG,CD,GA,NG		3634	https://amphibiaweb.org/species/3634
Anura	Arthroleptidae		Leptopelis		aubryioides		Leptopelis omissus	Leptopelis omissus		Least Concern (LC)	CM,CG,GQ,GA,NG		7267	https://amphibiaweb.org/species/7267
Anura	Arthroleptidae		Leptopelis		bequaerti		Leptopelis bequaerti			Data Deficient (DD)	LR		3636	https://amphibiaweb.org/species/3636
Anura	Arthroleptidae		Leptopelis		bocagii	Bocage's Tree Frog	Leptopelis bocagii	Leptopelis bocagei		Least Concern (LC)	AO,BI,CD,ET,KE,MW,MZ,NA,RW,ZA,TZ,ZM,ZW		3637	https://amphibiaweb.org/species/3637
Anura	Arthroleptidae		Leptopelis		boulengeri		Leptopelis boulengeri			Least Concern (LC)	CM,CG,CD,GQ,GA,NG		3638	https://amphibiaweb.org/species/3638
Anura	Arthroleptidae		Leptopelis		brevirostris		Leptopelis brevirostris	Leptopelis crystallinoron, Leptopelis brevipes		Least Concern (LC)	CM,CG,GQ,GA,NG		3640	https://amphibiaweb.org/species/3640
Anura	Arthroleptidae		Leptopelis		broadleyi		Leptopelis argenteus	Leptopelis argenteus, Hylambates argenteus	Hylambates argenteus	Least Concern (LC)	ZW,MZ,MW		3641	https://amphibiaweb.org/species/3641
Anura	Arthroleptidae		Leptopelis		bufonides		Leptopelis bufonides			Least Concern (LC)	BJ,BF,CM,GM,GH,NG,SN		3642	https://amphibiaweb.org/species/3642
Anura	Arthroleptidae		Leptopelis		calcaratus		Leptopelis calcaratus			Least Concern (LC)	CM,CF,CG,CD,GQ,GA,NG		3643	https://amphibiaweb.org/species/3643
Anura	Arthroleptidae		Leptopelis		christyi		Leptopelis christyi			Least Concern (LC)	CD,TZ,UG		3644	https://amphibiaweb.org/species/3644
Anura	Arthroleptidae		Leptopelis		concolor		Leptopelis concolor			Least Concern (LC)	TZ,KE,SO		3645	https://amphibiaweb.org/species/3645
Anura	Arthroleptidae		Leptopelis		cynnamomeus	Cinnamon tree frog	Leptopelis cynnamomeus			Least Concern (LC)	AO,BI,CD,RW,ZM		3646	https://amphibiaweb.org/species/3646
Anura	Arthroleptidae		Leptopelis		fenestratus		Leptopelis fenestratus			Data Deficient (DD)	CD		3647	https://amphibiaweb.org/species/3647
Anura	Arthroleptidae		Leptopelis		fiziensis		Leptopelis fiziensis			Data Deficient (DD)	TZ,CD		3648	https://amphibiaweb.org/species/3648
Anura	Arthroleptidae		Leptopelis		flavomaculatus	Yellow-spotted tree frog	Leptopelis flavomaculatus			Least Concern (LC)	KE,MW,MZ,TZ,ZW		3649	https://amphibiaweb.org/species/3649
Anura	Arthroleptidae		Leptopelis		gramineus		Leptopelis gramineus			Least Concern (LC)	ET		3650	https://amphibiaweb.org/species/3650
Anura	Arthroleptidae		Leptopelis		grandiceps		Leptopelis grandiceps	Leptopelis barbouri		Vulnerable (VU)	TZ		8172	https://amphibiaweb.org/species/8172
Anura	Arthroleptidae		Leptopelis		jordani		Leptopelis jordani			Data Deficient (DD)	AO		3652	https://amphibiaweb.org/species/3652
Anura	Arthroleptidae		Leptopelis		karissimbensis		Leptopelis karissimbensis			Vulnerable (VU)	CD,RW,UG		3653	https://amphibiaweb.org/species/3653
Anura	Arthroleptidae		Leptopelis		kivuensis		Leptopelis kivuensis			Least Concern (LC)	BI,RW,UG,CD		3654	https://amphibiaweb.org/species/3654
Anura	Arthroleptidae		Leptopelis		lebeaui		Leptopelis lebeaui			Data Deficient (DD)	CD		3655	https://amphibiaweb.org/species/3655
Anura	Arthroleptidae		Leptopelis		mackayi		Leptopelis mackayi			Data Deficient (DD)	KE		6879	https://amphibiaweb.org/species/6879
Anura	Arthroleptidae		Leptopelis		macrotis		Leptopelis macrotis			Near Threatened (NT)	GH,CI,LR,SL		3656	https://amphibiaweb.org/species/3656
Anura	Arthroleptidae		Leptopelis		marginatus		Leptopelis marginatus			Data Deficient (DD)	AO		3657	https://amphibiaweb.org/species/3657
Anura	Arthroleptidae		Leptopelis		millsoni		Leptopelis millsoni			Least Concern (LC)	CM,CF,CG,CD,GA,NG		3658	https://amphibiaweb.org/species/3658
Anura	Arthroleptidae		Leptopelis		modestus		Leptopelis modestus			Least Concern (LC)	CM,CD,KE,NG		3659	https://amphibiaweb.org/species/3659
Anura	Arthroleptidae		Leptopelis		mossambicus	Mozambique tree frog	Leptopelis mossambicus			Least Concern (LC)	MW,MZ,ZA,SZ,ZW		5711	https://amphibiaweb.org/species/5711
Anura	Arthroleptidae		Leptopelis		mtoewaate	Kabembe Treefrog					CD		8236	https://amphibiaweb.org/species/8236
Anura	Arthroleptidae		Leptopelis		natalensis	Natal Tree Frog	Leptopelis natalensis			Least Concern (LC)	MZ,ZA		3661	https://amphibiaweb.org/species/3661
Anura	Arthroleptidae		Leptopelis		nordequatorialis		Leptopelis nordequatorialis			Least Concern (LC)	CM,NG		3662	https://amphibiaweb.org/species/3662
Anura	Arthroleptidae		Leptopelis		notatus		Leptopelis notatus	Habrahyla eiselti, Hylambates notatus, Hylambates tessmanni	Habrahyla eiselti, Hylambates notatus, Hylambates tessmanni	Least Concern (LC)	CM,CG,CD,GA,NG		3663	https://amphibiaweb.org/species/3663
Anura	Arthroleptidae		Leptopelis		occidentalis		Leptopelis occidentalis			Near Threatened (NT)	LR,CI,GH		3664	https://amphibiaweb.org/species/3664
Anura	Arthroleptidae		Leptopelis		ocellatus		Leptopelis ocellatus			Least Concern (LC)	CM,CG,CD,GA		3665	https://amphibiaweb.org/species/3665
Anura	Arthroleptidae		Leptopelis		oryi		Leptopelis oryi			Least Concern (LC)	CD,UG		3667	https://amphibiaweb.org/species/3667
Anura	Arthroleptidae		Leptopelis		palmatus		Leptopelis palmatus			Vulnerable (VU)	ST		3668	https://amphibiaweb.org/species/3668
Anura	Arthroleptidae		Leptopelis		parbocagii		Leptopelis parbocagii			Least Concern (LC)	AO,CD,MW,MZ,TZ,ZM		3669	https://amphibiaweb.org/species/3669
Anura	Arthroleptidae		Leptopelis		parkeri		Leptopelis parkeri			Endangered (EN)	TZ		3670	https://amphibiaweb.org/species/3670
Anura	Arthroleptidae		Leptopelis		parvus		Leptopelis parvus			Data Deficient (DD)	CD		3671	https://amphibiaweb.org/species/3671
Anura	Arthroleptidae		Leptopelis		ragazzii		Leptopelis ragazzii			Vulnerable (VU)	ET		3672	https://amphibiaweb.org/species/3672
Anura	Arthroleptidae		Leptopelis		rufus		Leptopelis rufus			Least Concern (LC)	CM,CD,GA,NG		3673	https://amphibiaweb.org/species/3673
Anura	Arthroleptidae		Leptopelis		spiritusnoctis		Leptopelis spiritusnoctis			Least Concern (LC)	BJ,CI,GH,GN,LR,NG,SL,TG		6938	https://amphibiaweb.org/species/6938
Anura	Arthroleptidae		Leptopelis		susanae		Leptopelis susanae			Endangered (EN)	ET		3674	https://amphibiaweb.org/species/3674
Anura	Arthroleptidae		Leptopelis		uluguruensis		Leptopelis uluguruensis			Near Threatened (NT)	TZ		3675	https://amphibiaweb.org/species/3675
Anura	Arthroleptidae		Leptopelis		vannutellii		Leptopelis vannutellii			Least Concern (LC)	ET		3676	https://amphibiaweb.org/species/3676
Anura	Arthroleptidae		Leptopelis		vermiculatus		Leptopelis vermiculatus			Endangered (EN)	TZ		3677	https://amphibiaweb.org/species/3677
Anura	Arthroleptidae		Leptopelis		viridis		Leptopelis viridis			Least Concern (LC)	BJ,BF,CM,CD,CI,GA,GM,GH,GN,GW,LR,NE,NG,SN,SL,SS,TG		3678	https://amphibiaweb.org/species/3678
Anura	Arthroleptidae		Leptopelis		xenodactylus	Long-toed Tree Frog	Leptopelis xenodactylus			Endangered (EN)	ZA		3679	https://amphibiaweb.org/species/3679
Anura	Arthroleptidae		Leptopelis		yaldeni		Leptopelis yaldeni			Vulnerable (VU)	ET		3680	https://amphibiaweb.org/species/3680
Anura	Arthroleptidae		Leptopelis		zebra		Leptopelis zebra			Near Threatened (NT)	CM,GA		5854	https://amphibiaweb.org/species/5854
Anura	Arthroleptidae		Nyctibates		corrugatus		Nyctibates corrugatus			Least Concern (LC)	CM,GQ,GA,NG		1480	https://amphibiaweb.org/species/1480
Anura	Arthroleptidae		Scotobleps		gabonicus		Scotobleps gabonicus			Least Concern (LC)	CM,CG,CD,GQ,GA,NG		1504	https://amphibiaweb.org/species/1504
Anura	Arthroleptidae		Trichobatrachus		robustus	Hairy Frog	Trichobatrachus robustus			Least Concern (LC)	AO,CM,CG,CD,GQ,GA,NG		1506	https://amphibiaweb.org/species/1506
Anura	Ascaphidae		Ascaphus		montanus	Rocky Mountain Tailed Frog, Inland Tailed Frog, Eastern Tailed Frog	Ascaphus montanus			Least Concern (LC)	CA,US		5822	https://amphibiaweb.org/species/5822
Anura	Ascaphidae		Ascaphus		truei	Pacific Tailed Frog, Coastal Tailed Frog, Western Tailed Frog	Ascaphus truei			Least Concern (LC)	US,CA		2049	https://amphibiaweb.org/species/2049
Anura	Batrachylidae		Atelognathus		jeinimenensis		Atelognathus jeinimenensis			Near Threatened (NT)	AR,CL		7696	https://amphibiaweb.org/species/7696
Anura	Batrachylidae		Atelognathus		nitoi		Atelognathus nitoi	Atelognathus salai, Atelognathus ceii		Vulnerable (VU)	AR		2565	https://amphibiaweb.org/species/2565
Anura	Batrachylidae		Atelognathus		patagonicus	Patagonia Frog	Atelognathus patagonicus	Telmatobius patagonicus	Telmatobius patagonicus	Endangered (EN)	AR		2566	https://amphibiaweb.org/species/2566
Anura	Batrachylidae		Atelognathus		praebasalticus		Atelognathus praebasalticus	Telmatobius praebasalticus	Telmatobius praebasalticus	Endangered (EN)	AR		2567	https://amphibiaweb.org/species/2567
Anura	Batrachylidae		Atelognathus		reverberii		Atelognathus reverberii	Telmatobius reverberii	Telmatobius reverberii	Vulnerable (VU)	AR		2568	https://amphibiaweb.org/species/2568
Anura	Batrachylidae		Atelognathus		solitarius		Atelognathus solitarius			Vulnerable (VU)	AR		2570	https://amphibiaweb.org/species/2570
Anura	Batrachylidae		Batrachyla		antartandica		Batrachyla antartandica			Least Concern (LC)	CL,AR		2580	https://amphibiaweb.org/species/2580
Anura	Batrachylidae		Batrachyla		fitzroya		Batrachyla fitzroya			Vulnerable (VU)	AR		2581	https://amphibiaweb.org/species/2581
Anura	Batrachylidae		Batrachyla		leptopus		Batrachyla leptopus			Least Concern (LC)	CL,AR		2582	https://amphibiaweb.org/species/2582
Anura	Batrachylidae		Batrachyla		nibaldoi		Batrachyla nibaldoi			Data Deficient (DD)	CL		5717	https://amphibiaweb.org/species/5717
Anura	Batrachylidae		Batrachyla		taeniata		Batrachyla taeniata	Eupsophus taeniatus	Eupsophus taeniatus	Least Concern (LC)	CL,AR		2583	https://amphibiaweb.org/species/2583
Anura	Batrachylidae		Chaltenobatrachus		grandisonae	Puerto Eden Frog	Chaltenobatrachus grandisonae			Data Deficient (DD)	AR,CL		2564	https://amphibiaweb.org/species/2564
Anura	Batrachylidae		Hylorina		sylvatica	Emerald Forest Frog	Hylorina sylvatica			Least Concern (LC)	CL,AR		2639	https://amphibiaweb.org/species/2639
Anura	Bombinatoridae		Barbourula		busuangensis	Philippine Flat-headed Frog	Barbourula busuangensis			Vulnerable (VU)	PH		2038	https://amphibiaweb.org/species/2038
Anura	Bombinatoridae		Barbourula		kalimantanensis	Kalimantan Jungle Toad, Bornean Flat-headed Frog	Barbourula kalimantanensis			Endangered (EN)	ID		2039	https://amphibiaweb.org/species/2039
Anura	Bombinatoridae		Bombina		bombina	Fire-Bellied Toad	Bombina bombina			Least Concern (LC)	AT,BY,BA,BG,HR,CZ,DK,DE,GR,HU,KZ,LV,LT,MD,PL,RO,RU,RS,SK,SI,SE,TR,UA		2041	https://amphibiaweb.org/species/2041
Anura	Bombinatoridae		Bombina		fortinuptialis	Large-spined Bell Toad		Bombinator maximus	Bombinator maximus		CN		2042	https://amphibiaweb.org/species/2042
Anura	Bombinatoridae		Bombina		lichuanensis	Lichuan Bell Toad	Bombina lichuanensis			Vulnerable (VU)	CN		5296	https://amphibiaweb.org/species/5296
Anura	Bombinatoridae		Bombina		maxima	Large-webbed Bell Toad		Bombinator maximus	Bombinator maximus		CN		2043	https://amphibiaweb.org/species/2043
Anura	Bombinatoridae		Bombina		microdeladigitora	Small-webbed Bell Toad, Hubei Fire Bellied Toad or Yunnan Fire Bellied Toad		Bombinator maximus	Bombinator maximus		CN,VN		2044	https://amphibiaweb.org/species/2044
Anura	Bombinatoridae		Bombina		orientalis	Oriental Fire-Bellied Toad	Bombina orientalis			Least Concern (LC)	RU,KR,KP,CN		2045	https://amphibiaweb.org/species/2045
Anura	Bombinatoridae		Bombina		pachypus	Apennine Yellow-bellied Toad	Bombina pachypus			Endangered (EN)	IT		5994	https://amphibiaweb.org/species/5994
Anura	Bombinatoridae		Bombina		variegata	Yellow-Bellied Toad	Bombina variegata			Least Concern (LC)	AT,BE,BG,CZ,FR,DE,GR,HU,IT,LI,LU,MK,MD,ME,NL,PL,RO,RS,SK,SI,CH,UA		2046	https://amphibiaweb.org/species/2046
Anura	Brachycephalidae		Brachycephalus		actaeus						BR		8817	https://amphibiaweb.org/species/8817
Anura	Brachycephalidae		Brachycephalus		albolineatus						BR		8526	https://amphibiaweb.org/species/8526
Anura	Brachycephalidae		Brachycephalus		alipioi		Brachycephalus alipioi			Data Deficient (DD)	BR		6807	https://amphibiaweb.org/species/6807
Anura	Brachycephalidae		Brachycephalus		atelopoide						BR		7848	https://amphibiaweb.org/species/7848
Anura	Brachycephalidae		Brachycephalus		auroguttatus						BR		8338	https://amphibiaweb.org/species/8338
Anura	Brachycephalidae		Brachycephalus		boticario						BR		8342	https://amphibiaweb.org/species/8342
Anura	Brachycephalidae		Brachycephalus		brunneus		Brachycephalus brunneus			Data Deficient (DD)	BR		6541	https://amphibiaweb.org/species/6541
Anura	Brachycephalidae		Brachycephalus		bufonoides						BR		7850	https://amphibiaweb.org/species/7850
Anura	Brachycephalidae		Brachycephalus		coloratus						BR		8659	https://amphibiaweb.org/species/8659
Anura	Brachycephalidae		Brachycephalus		crispus						BR		8134	https://amphibiaweb.org/species/8134
Anura	Brachycephalidae		Brachycephalus		curupira						BR		8660	https://amphibiaweb.org/species/8660
Anura	Brachycephalidae		Brachycephalus		darkside						BR		8618	https://amphibiaweb.org/species/8618
Anura	Brachycephalidae		Brachycephalus		didactylus		Brachycephalus didactylus			Least Concern (LC)	BR		5536	https://amphibiaweb.org/species/5536
Anura	Brachycephalidae		Brachycephalus		ephippium	Pumpkin Toadlet, Spix's Saddleback Toad, Botao de Ouro, Sapinho Dourado	Brachycephalus ephippium			Least Concern (LC)	BR		2033	https://amphibiaweb.org/species/2033
Anura	Brachycephalidae		Brachycephalus		ferruginus		Brachycephalus ferruginus			Data Deficient (DD)	BR		6742	https://amphibiaweb.org/species/6742
Anura	Brachycephalidae		Brachycephalus		fuscolineatus						BR		8340	https://amphibiaweb.org/species/8340
Anura	Brachycephalidae		Brachycephalus		garbeana						BR		7849	https://amphibiaweb.org/species/7849
Anura	Brachycephalidae		Brachycephalus		guarani						BR		7906	https://amphibiaweb.org/species/7906
Anura	Brachycephalidae		Brachycephalus		hermogenesi		Brachycephalus hermogenesi			Least Concern (LC)	BR		5514	https://amphibiaweb.org/species/5514
Anura	Brachycephalidae		Brachycephalus		izecksohni		Brachycephalus izecksohni			Data Deficient (DD)	BR		6542	https://amphibiaweb.org/species/6542
Anura	Brachycephalidae		Brachycephalus		leopardus						BR		8341	https://amphibiaweb.org/species/8341
Anura	Brachycephalidae		Brachycephalus		margaritatus						BR		7961	https://amphibiaweb.org/species/7961
Anura	Brachycephalidae		Brachycephalus		mariaeterezae						BR		8336	https://amphibiaweb.org/species/8336
Anura	Brachycephalidae		Brachycephalus		mirissimus					Critically Endangered (CR) - Provisional	BR		8916	https://amphibiaweb.org/species/8916
Anura	Brachycephalidae		Brachycephalus		nodoterga		Brachycephalus nodoterga			Data Deficient (DD)	BR		2034	https://amphibiaweb.org/species/2034
Anura	Brachycephalidae		Brachycephalus		olivaceus						BR		8337	https://amphibiaweb.org/species/8337
Anura	Brachycephalidae		Brachycephalus		pernix		Brachycephalus pernix			Data Deficient (DD)	BR		5421	https://amphibiaweb.org/species/5421
Anura	Brachycephalidae		Brachycephalus		pitanga	Red Pumpkin Toadlet					BR		7334	https://amphibiaweb.org/species/7334
Anura	Brachycephalidae		Brachycephalus		pombali		Brachycephalus pombali			Data Deficient (DD)	BR		6743	https://amphibiaweb.org/species/6743
Anura	Brachycephalidae		Brachycephalus		pulex						BR		7691	https://amphibiaweb.org/species/7691
Anura	Brachycephalidae		Brachycephalus		quiririensis						BR		8365	https://amphibiaweb.org/species/8365
Anura	Brachycephalidae		Brachycephalus		sulfuratus	Sulfurous flea toad					BR		8447	https://amphibiaweb.org/species/8447
Anura	Brachycephalidae		Brachycephalus		toby						BR		7590	https://amphibiaweb.org/species/7590
Anura	Brachycephalidae		Brachycephalus		tridactylus						BR		7839	https://amphibiaweb.org/species/7839
Anura	Brachycephalidae		Brachycephalus		verrucosus						BR		8339	https://amphibiaweb.org/species/8339
Anura	Brachycephalidae		Brachycephalus		vertebralis		Brachycephalus vertebralis			Data Deficient (DD)	BR		5835	https://amphibiaweb.org/species/5835
Anura	Brachycephalidae		Ischnocnema		abdita						BR		7639	https://amphibiaweb.org/species/7639
Anura	Brachycephalidae		Ischnocnema		bocaina						BR		9113	https://amphibiaweb.org/species/9113
Anura	Brachycephalidae		Ischnocnema		bolbodactyla		Ischnocnema bolbodactyla	Basanitia bolbodactyla, Eupemphix bolbodactyla, Eleutherodactylus bolbodactylus	Basanitia bolbodactyla, Eupemphix bolbodactyla, Eleutherodactylus bolbodactylus	Least Concern (LC)	BR		2810	https://amphibiaweb.org/species/2810
Anura	Brachycephalidae		Ischnocnema		colibri						BR		8902	https://amphibiaweb.org/species/8902
Anura	Brachycephalidae		Ischnocnema		concolor						BR		7401	https://amphibiaweb.org/species/7401
Anura	Brachycephalidae		Ischnocnema		epipeda		Ischnocnema epipeda	Eleutherodactylus epipedus	Eleutherodactylus epipedus	Near Threatened (NT)	BR		2907	https://amphibiaweb.org/species/2907
Anura	Brachycephalidae		Ischnocnema		erythromera		Ischnocnema erythromera	Eleutherodactylus erythromerus	Eleutherodactylus erythromerus	Data Deficient (DD)	BR		2911	https://amphibiaweb.org/species/2911
Anura	Brachycephalidae		Ischnocnema		feioi						BR		8856	https://amphibiaweb.org/species/8856
Anura	Brachycephalidae		Ischnocnema		garciai						BR		8857	https://amphibiaweb.org/species/8857
Anura	Brachycephalidae		Ischnocnema		gehrti		Ischnocnema gehrti	Eleutherodactylus gehrti	Eleutherodactylus gehrti	Data Deficient (DD)	BR		6148	https://amphibiaweb.org/species/6148
Anura	Brachycephalidae		Ischnocnema		gualteri		Ischnocnema gualteri	Eleutherodactylus gualteri	Eleutherodactylus gualteri	Least Concern (LC)	BR		2949	https://amphibiaweb.org/species/2949
Anura	Brachycephalidae		Ischnocnema		guentheri	Steindachner's Robber Frog; ra-da-mata, razinha, ra-do-folhiÃƒÂ§o.	Ischnocnema guentheri	Eleutherodactylus guentheri	Eleutherodactylus guentheri	Least Concern (LC)	BR		2952	https://amphibiaweb.org/species/2952
Anura	Brachycephalidae		Ischnocnema		henselii		Ischnocnema henselii			Least Concern (LC)	BR		6697	https://amphibiaweb.org/species/6697
Anura	Brachycephalidae		Ischnocnema		hoehnei		Ischnocnema hoehnei	Eleutherodactylus hoehnei	Eleutherodactylus hoehnei	Least Concern (LC)	BR		2967	https://amphibiaweb.org/species/2967
Anura	Brachycephalidae		Ischnocnema		holti		Ischnocnema holti	Eleutherodactylus holti, Eleutherodactylus unistrigatus holti	Eleutherodactylus holti, Eleutherodactylus unistrigatus holti	Data Deficient (DD)	BR		2968	https://amphibiaweb.org/species/2968
Anura	Brachycephalidae		Ischnocnema		izecksohni		Ischnocnema izecksohni	Eleutherodactylus izecksohni	Eleutherodactylus izecksohni	Data Deficient (DD)	BR		2985	https://amphibiaweb.org/species/2985
Anura	Brachycephalidae		Ischnocnema		juipoca		Ischnocnema juipoca	Eleutherodactylus juipoca	Eleutherodactylus juipoca	Least Concern (LC)	BR		2994	https://amphibiaweb.org/species/2994
Anura	Brachycephalidae		Ischnocnema		karst						BR		7908	https://amphibiaweb.org/species/7908
Anura	Brachycephalidae		Ischnocnema		lactea		Ischnocnema lactea	Basanitia lactea, Eleutherodactylus lacteus	Basanitia lactea, Eleutherodactylus lacteus	Least Concern (LC)	BR		3002	https://amphibiaweb.org/species/3002
Anura	Brachycephalidae		Ischnocnema		manezinho		Ischnocnema manezinho	Eleutherodactylus manezinho	Eleutherodactylus manezinho	Near Threatened (NT)	BR		5756	https://amphibiaweb.org/species/5756
Anura	Brachycephalidae		Ischnocnema		melanopygia						BR		7400	https://amphibiaweb.org/species/7400
Anura	Brachycephalidae		Ischnocnema		nanahallux						BR		8013	https://amphibiaweb.org/species/8013
Anura	Brachycephalidae		Ischnocnema		nasuta		Ischnocnema nasuta	Eleutherodactylus nasutus	Eleutherodactylus nasutus	Least Concern (LC)	BR		3075	https://amphibiaweb.org/species/3075
Anura	Brachycephalidae		Ischnocnema		nigriventris		Ischnocnema nigriventris	Eleutherodactylus nigriventris	Eleutherodactylus nigriventris	Data Deficient (DD)	BR		3080	https://amphibiaweb.org/species/3080	This species long was known only from three juvenile lectotypes (described in 1925). It was rediscovered near the type locality in the state of Sao Paulo, Brazil, redescribed, and revalidated as a species (Berneck et al. Zootaxa 2013 3694: 131-142).
Anura	Brachycephalidae		Ischnocnema		octavioi		Ischnocnema octavioi	Eleutherodactylus octavioi	Eleutherodactylus octavioi	Least Concern (LC)	BR		3094	https://amphibiaweb.org/species/3094
Anura	Brachycephalidae		Ischnocnema		oea		Ischnocnema oea	Eleutherodactylus oeus	Eleutherodactylus oeus	Near Threatened (NT)	BR		3095	https://amphibiaweb.org/species/3095
Anura	Brachycephalidae		Ischnocnema		paranaensis		Ischnocnema paranaensis	Eleutherodactylus paranaensis	Eleutherodactylus paranaensis	Data Deficient (DD)	BR		5761	https://amphibiaweb.org/species/5761
Anura	Brachycephalidae		Ischnocnema		parnaso						BR		8901	https://amphibiaweb.org/species/8901
Anura	Brachycephalidae		Ischnocnema		parva		Ischnocnema parva	Eleutherodactylus parvus, Leptodactylus pumilio, Phrynanodus nanus	Eleutherodactylus parvus, Leptodactylus pumilio, Phrynanodus nanus	Least Concern (LC)	BR		3113	https://amphibiaweb.org/species/3113
Anura	Brachycephalidae		Ischnocnema		penaxavantinho		Ischnocnema penaxavantinho			Data Deficient (DD)	BR		7017	https://amphibiaweb.org/species/7017
Anura	Brachycephalidae		Ischnocnema		pusilla		Ischnocnema pusilla	Eleutherodactylus pusillus	Eleutherodactylus pusillus	Data Deficient (DD)	BR		3157	https://amphibiaweb.org/species/3157
Anura	Brachycephalidae		Ischnocnema		randorum		Ischnocnema randorum	Eleutherodactylus randorum	Eleutherodactylus randorum	Data Deficient (DD)	BR		3165	https://amphibiaweb.org/species/3165
Anura	Brachycephalidae		Ischnocnema		sambaqui		Ischnocnema sambaqui	Eleutherodactylus sambaqui	Eleutherodactylus sambaqui	Data Deficient (DD)	BR		6157	https://amphibiaweb.org/species/6157
Anura	Brachycephalidae		Ischnocnema		spanios		Ischnocnema spanios	Eleutherodactylus spanios	Eleutherodactylus spanios	Data Deficient (DD)	BR		3218	https://amphibiaweb.org/species/3218
Anura	Brachycephalidae		Ischnocnema		surda						BR		7599	https://amphibiaweb.org/species/7599
Anura	Brachycephalidae		Ischnocnema		venancioi		Ischnocnema venancioi	Eleutherodactylus venancioi	Eleutherodactylus venancioi	Least Concern (LC)	BR		3266	https://amphibiaweb.org/species/3266
Anura	Brachycephalidae		Ischnocnema		verrucosa		Ischnocnema verrucosa	Eupsophus versus, Pleurodema verrucosa	Eupsophus versus, Pleurodema verrucosa	Data Deficient (DD)	BR		2647	https://amphibiaweb.org/species/2647
Anura	Brachycephalidae		Ischnocnema		vizottoi						BR		7552	https://amphibiaweb.org/species/7552
Anura	Brevicipitidae		Balebreviceps		hillmani		Balebreviceps hillmani			Critically Endangered (CR)	ET		2369	https://amphibiaweb.org/species/2369
Anura	Brevicipitidae		Breviceps		acutirostris	Strawberry rain frog	Breviceps acutirostris			Least Concern (LC)	ZA		2371	https://amphibiaweb.org/species/2371
Anura	Brevicipitidae		Breviceps		adspersus	Common rain frog	Breviceps adspersus			Least Concern (LC)	AO,BW,MZ,NA,ZA,SZ,ZM,ZW		2372	https://amphibiaweb.org/species/2372
Anura	Brevicipitidae		Breviceps		bagginsi	BilboÃ¢â‚¬â„¢s Rain Frog	Breviceps bagginsi			Near Threatened (NT)	ZA		6246	https://amphibiaweb.org/species/6246
Anura	Brevicipitidae		Breviceps		branchi	Branch's rain frog	Breviceps branchi			Data Deficient (DD)	ZA		7843	https://amphibiaweb.org/species/7843
Anura	Brevicipitidae		Breviceps		carruthersi						ZA		8665	https://amphibiaweb.org/species/8665
Anura	Brevicipitidae		Breviceps		fichus		Breviceps fichus			Least Concern (LC)	TZ		6569	https://amphibiaweb.org/species/6569
Anura	Brevicipitidae		Breviceps		fuscus	Black rain frog	Breviceps fuscus			Least Concern (LC)	ZA		2373	https://amphibiaweb.org/species/2373
Anura	Brevicipitidae		Breviceps		gibbosus	Giant rain frog	Breviceps gibbosus			Near Threatened (NT)	ZA		2374	https://amphibiaweb.org/species/2374
Anura	Brevicipitidae		Breviceps		macrops	Desert rain frog, Boulenger's short-headed frog, Melkpadda (Afrikaans), Woestynreenpadda	Breviceps macrops			Near Threatened (NT)	ZA,NA		2375	https://amphibiaweb.org/species/2375
Anura	Brevicipitidae		Breviceps		montanus	Mountain rain frog	Breviceps montanus			Least Concern (LC)	ZA		2377	https://amphibiaweb.org/species/2377
Anura	Brevicipitidae		Breviceps		mossambicus	Mozambique rain frog	Breviceps mossambicus			Least Concern (LC)	BW,CD,MW,MZ,ZA,SZ,TZ,ZM,ZW		2378	https://amphibiaweb.org/species/2378
Anura	Brevicipitidae		Breviceps		namaquensis	Namaqua rain frog	Breviceps namaquensis			Least Concern (LC)	ZA,NA		2379	https://amphibiaweb.org/species/2379
Anura	Brevicipitidae		Breviceps		passmorei						ZA		8666	https://amphibiaweb.org/species/8666
Anura	Brevicipitidae		Breviceps		poweri	Power's rain frog	Breviceps poweri			Least Concern (LC)	CD,MW,MZ,ZM		2380	https://amphibiaweb.org/species/2380
Anura	Brevicipitidae		Breviceps		rosei	Rose's rain frog	Breviceps rosei			Least Concern (LC)	ZA		2381	https://amphibiaweb.org/species/2381
Anura	Brevicipitidae		Breviceps		sopranus		Breviceps sopranus			Least Concern (LC)	ZA,SZ		6245	https://amphibiaweb.org/species/6245
Anura	Brevicipitidae		Breviceps		sylvestris	Forest rain frog, Northern Forest Rain Frog	Breviceps sylvestris			Near Threatened (NT)	ZA		2382	https://amphibiaweb.org/species/2382
Anura	Brevicipitidae		Breviceps		verrucosus	Plaintive Rain Frog	Breviceps verrucosus	Breviceps maculatus		Least Concern (LC)	LS,ZA,SZ		2383	https://amphibiaweb.org/species/2383
Anura	Brevicipitidae		Callulina		dawida	Taita Warty Frog	Callulina dawida			Critically Endangered (CR)	KE		7314	https://amphibiaweb.org/species/7314
Anura	Brevicipitidae		Callulina		hanseni		Callulina hanseni			Critically Endangered (CR)	TZ		7593	https://amphibiaweb.org/species/7593
Anura	Brevicipitidae		Callulina		kanga		Callulina kanga			Critically Endangered (CR)	TZ		7594	https://amphibiaweb.org/species/7594
Anura	Brevicipitidae		Callulina		kisiwamsitu		Callulina kisiwamsitu			Endangered (EN)	TZ		6285	https://amphibiaweb.org/species/6285
Anura	Brevicipitidae		Callulina		kreffti		Callulina kreffti			Least Concern (LC)	KE,TZ		2385	https://amphibiaweb.org/species/2385
Anura	Brevicipitidae		Callulina		laphami		Callulina laphami			Critically Endangered (CR)	TZ		7581	https://amphibiaweb.org/species/7581
Anura	Brevicipitidae		Callulina		meteora		Callulina meteora			Critically Endangered (CR)	TZ		7741	https://amphibiaweb.org/species/7741
Anura	Brevicipitidae		Callulina		shengena		Callulina shengena			Critically Endangered (CR)	TZ		7582	https://amphibiaweb.org/species/7582
Anura	Brevicipitidae		Callulina		stanleyi		Callulina stanleyi			Critically Endangered (CR)	TZ		7583	https://amphibiaweb.org/species/7583
Anura	Brevicipitidae		Probreviceps		durirostris		Probreviceps durirostris			Endangered (EN)	TZ		6776	https://amphibiaweb.org/species/6776
Anura	Brevicipitidae		Probreviceps		loveridgei		Probreviceps loveridgei			Endangered (EN)	TZ		6829	https://amphibiaweb.org/species/6829
Anura	Brevicipitidae		Probreviceps		macrodactylus		Probreviceps macrodactylus			Endangered (EN)	TZ		2387	https://amphibiaweb.org/species/2387
Anura	Brevicipitidae		Probreviceps		rhodesianus		Probreviceps rhodesianus			Endangered (EN)	ZW		2388	https://amphibiaweb.org/species/2388
Anura	Brevicipitidae		Probreviceps		rungwensis		Probreviceps rungwensis			Endangered (EN)	TZ		7296	https://amphibiaweb.org/species/7296
Anura	Brevicipitidae		Probreviceps		uluguruensis		Probreviceps uluguruensis			Endangered (EN)	TZ		2389	https://amphibiaweb.org/species/2389
Anura	Brevicipitidae		Spelaeophryne		methneri		Spelaeophryne methneri			Least Concern (LC)	TZ		2391	https://amphibiaweb.org/species/2391
Anura	Bufonidae		Adenomus		kandianus		Adenomus kandianus	Adenomus dasi		Critically Endangered (CR)	LK		5995	https://amphibiaweb.org/species/5995	Rediscovered by Wickramasinghe and colleagues (Zootaxa 2012 3347:63-68). Status should be changed to Critically Endangered.
Anura	Bufonidae		Adenomus		kelaartii	Kelaart`s Dwarf Toad	Adenomus kelaartii			Endangered (EN)	LK		211	https://amphibiaweb.org/species/211
Anura	Bufonidae		Altiphrynoides		malcolmi	MalcolmÃ¢â‚¬â„¢s Ethiopian toad	Altiphrynoides malcolmi			Endangered (EN)	ET		3	https://amphibiaweb.org/species/3
Anura	Bufonidae		Altiphrynoides		osgoodi		Altiphrynoides osgoodi	Spinophrynoides osgoodi	Spinophrynoides osgoodi	Critically Endangered (CR)	ET		423	https://amphibiaweb.org/species/423
Anura	Bufonidae		Amazophrynella		amazonicola						PE		8331	https://amphibiaweb.org/species/8331
Anura	Bufonidae		Amazophrynella		bilinguis						BR		8995	https://amphibiaweb.org/species/8995
Anura	Bufonidae		Amazophrynella		bokermanni		Amazophrynella bokermanni			Least Concern (LC)	BR		325	https://amphibiaweb.org/species/325
Anura	Bufonidae		Amazophrynella		javierbustamantei						PE		8451	https://amphibiaweb.org/species/8451
Anura	Bufonidae		Amazophrynella		manaos						BR		8113	https://amphibiaweb.org/species/8113
Anura	Bufonidae		Amazophrynella		matses						PE		8332	https://amphibiaweb.org/species/8332
Anura	Bufonidae		Amazophrynella		minuta		Amazophrynella minuta	Atelopus minutus	Atelopus minutus	Least Concern (LC)	BR,CO,VE		329	https://amphibiaweb.org/species/329
Anura	Bufonidae		Amazophrynella		moisesii						BR		8878	https://amphibiaweb.org/species/8878
Anura	Bufonidae		Amazophrynella		siona						EC,PE		8876	https://amphibiaweb.org/species/8876
Anura	Bufonidae		Amazophrynella		teko						BR,GF		8875	https://amphibiaweb.org/species/8875
Anura	Bufonidae		Amazophrynella		vote						BR		7903	https://amphibiaweb.org/species/7903
Anura	Bufonidae		Amazophrynella		xinguensis						BR		8877	https://amphibiaweb.org/species/8877
Anura	Bufonidae		Anaxyrus		americanus	American Toad, Eastern American Toad (<i>A. a. americanus</i>), Dwarf American Toad (<i>A. a. charlesmithi</i>)	Anaxyrus americanus	Bufo americanus, Anaxyrus americanus americanus	Anaxyrus americanus americanus	Least Concern (LC)	US,CA		100	https://amphibiaweb.org/species/100
Anura	Bufonidae		Anaxyrus		baxteri	Wyoming Toad	Anaxyrus baxteri	Bufo hemiophrys baxteri, Bufo baxteri	Bufo hemiophrys baxteri, Bufo baxteri	Extinct in the Wild (EW)	US		114	https://amphibiaweb.org/species/114
Anura	Bufonidae		Anaxyrus		boreas	Western Toad, Boreal Toad (<i>B. b. boreas</i>), California Toad (<i>B. b. halophilus</i>)	Anaxyrus boreas	Bufo boreas, Bufo politus	Bufo boreas, Bufo politus	Least Concern (LC)	US,CA,MX		122	https://amphibiaweb.org/species/122
Anura	Bufonidae		Anaxyrus		californicus	Arroyo Toad, Arroyo Southwestern Toad	Anaxyrus californicus	Bufo microscaphus californicus, Bufo cognatus californicus, Bufo californicus	Bufo microscaphus californicus, Bufo cognatus californicus, Bufo californicus	Endangered (EN)	US,MX		131	https://amphibiaweb.org/species/131
Anura	Bufonidae		Anaxyrus		canorus	Yosemite Toad	Anaxyrus canorus	Bufo canorus	Bufo canorus	Endangered (EN)	US		135	https://amphibiaweb.org/species/135
Anura	Bufonidae		Anaxyrus		cognatus	Great Plains Toad	Anaxyrus cognatus	Bufo cognatus	Bufo cognatus	Least Concern (LC)	US,MX,CA		145	https://amphibiaweb.org/species/145
Anura	Bufonidae		Anaxyrus		compactilis		Anaxyrus compactilis	Bufo compactilis	Bufo compactilis	Least Concern (LC)	MX		146	https://amphibiaweb.org/species/146
Anura	Bufonidae		Anaxyrus		debilis	Green Toad, Eastern Green Toad (<i>B. d. debilis</i>), Western Green Toad (<i>B. d. insidior</i>)	Anaxyrus debilis	Anaxyrus debilis debilis	Anaxyrus debilis debilis	Least Concern (LC)	US,MX		159	https://amphibiaweb.org/species/159
Anura	Bufonidae		Anaxyrus		exsul	Black Toad	Anaxyrus exsul	Bufo exsul	Bufo exsul	Vulnerable (VU)	US		166	https://amphibiaweb.org/species/166
Anura	Bufonidae		Anaxyrus		fowleri	Fowler's Toad	Anaxyrus fowleri	Bufo woodhousii fowleri, Bufo fowleri, Bufo woodhousii velatus	Bufo woodhousii fowleri, Bufo fowleri, Bufo woodhousii velatus	Least Concern (LC)	CA,US		173	https://amphibiaweb.org/species/173
Anura	Bufonidae		Anaxyrus		hemiophrys	Canadian Toad	Anaxyrus hemiophrys	Bufo hemiophrys, Bufo hemiophrys hemiophrys, Bufo woodhousei hemiophrys	Bufo hemiophrys, Bufo hemiophrys hemiophrys, Bufo woodhousei hemiophrys	Least Concern (LC)	US,CA		192	https://amphibiaweb.org/species/192
Anura	Bufonidae		Anaxyrus		houstonensis	Houston Toad	Anaxyrus houstonensis	Bufo houstonensis	Bufo houstonensis	Endangered (EN)	US		197	https://amphibiaweb.org/species/197
Anura	Bufonidae		Anaxyrus		kelloggi	Little Mexican Toad	Anaxyrus kelloggi	Bufo kelloggi	Bufo kelloggi	Least Concern (LC)	MX		212	https://amphibiaweb.org/species/212
Anura	Bufonidae		Anaxyrus		mexicanus		Anaxyrus mexicanus	Bufo mexicanus	Bufo mexicanus	Near Threatened (NT)	MX		5545	https://amphibiaweb.org/species/5545
Anura	Bufonidae		Anaxyrus		microscaphus	Arizona Toad	Anaxyrus microscaphus	Bufo microscaphus, Bufo microscaphus microscaphus	Bufo microscaphus, Bufo microscaphus microscaphus	Least Concern (LC)	US		237	https://amphibiaweb.org/species/237
Anura	Bufonidae		Anaxyrus		monfontanus	Hot Creek Toad		Bufo monfontanus			US		9158	https://amphibiaweb.org/species/9158
Anura	Bufonidae		Anaxyrus		nelsoni	Amargosa Toad	Anaxyrus nelsoni	Bufo boreas nelsoni, Bufo nelsoni, Bufo halophilus nelsoni	Bufo boreas nelsoni, Bufo nelsoni, Bufo halophilus nelsoni	Endangered (EN)	US		6057	https://amphibiaweb.org/species/6057
Anura	Bufonidae		Anaxyrus		nevadensis	Railroad Valley Toad		Bufo nevadensis			US		9157	https://amphibiaweb.org/species/9157
Anura	Bufonidae		Anaxyrus		punctatus	Red-Spotted Toad	Anaxyrus punctatus	Bufo punctatus	Bufo punctatus	Least Concern (LC)	US,MX		260	https://amphibiaweb.org/species/260
Anura	Bufonidae		Anaxyrus		quercicus	Oak Toad	Anaxyrus quercicus	Bufo quercicus	Bufo quercicus	Least Concern (LC)	US		264	https://amphibiaweb.org/species/264
Anura	Bufonidae		Anaxyrus		retiformis	Sonoran Green Toad	Anaxyrus retiformis	Bufo retiformis, Bufo debilis retiformis	Bufo retiformis, Bufo debilis retiformis	Least Concern (LC)	US,MX		269	https://amphibiaweb.org/species/269
Anura	Bufonidae		Anaxyrus		speciosus	Texas Toad	Anaxyrus speciosus	Bufo speciosus	Bufo speciosus	Least Concern (LC)	US,MX		279	https://amphibiaweb.org/species/279
Anura	Bufonidae		Anaxyrus		terrestris	Southern Toad	Anaxyrus terrestris	Bufo terrestris, Rana terrestris, Buffo clamosus	Bufo terrestris, Rana terrestris, Buffo clamosus	Least Concern (LC)	US		291	https://amphibiaweb.org/species/291
Anura	Bufonidae		Anaxyrus		williamsi	Dixie Valley Toad		Bufo williamsi			US		8649	https://amphibiaweb.org/species/8649
Anura	Bufonidae		Anaxyrus		woodhousii	Woodhouse's Toad, Southwestern Woodhouse's Toad (<i>B. w. australis</i>), East Texas Toad (<i>B. w. velatus</i>), Rocky Mountain Toad or Woodhouse's Toad (<i>B. w. woodhousii</i>),	Anaxyrus woodhousii	Anaxyrus woodhousii woodhousii, Bufo woodhousii woodhousii	Anaxyrus woodhousii woodhousii	Least Concern (LC)	US,MX,CA		314	https://amphibiaweb.org/species/314
Anura	Bufonidae		Ansonia		albomaculata		Ansonia albomaculata			Near Threatened (NT)	MY,ID		9	https://amphibiaweb.org/species/9
Anura	Bufonidae		Ansonia		echinata					Vulnerable (VU)	MY		7694	https://amphibiaweb.org/species/7694
Anura	Bufonidae		Ansonia		endauensis		Ansonia endauensis			Data Deficient (DD)	MY		6865	https://amphibiaweb.org/species/6865
Anura	Bufonidae		Ansonia		fuliginea		Ansonia fuliginea	Ansonia altitudinis, Bufo fuligineus, Nectophryne altitudinis	Ansonia altitudinis, Bufo fuligineus, Nectophryne altitudinis	Vulnerable (VU)	MY		10	https://amphibiaweb.org/species/10
Anura	Bufonidae		Ansonia		glandulosa		Ansonia glandulosa			Data Deficient (DD)	ID		6830	https://amphibiaweb.org/species/6830
Anura	Bufonidae		Ansonia		guibei		Ansonia guibei			Endangered (EN)	MY		11	https://amphibiaweb.org/species/11
Anura	Bufonidae		Ansonia		hanitschi		Ansonia hanitschi			Near Threatened (NT)	MY		12	https://amphibiaweb.org/species/12
Anura	Bufonidae		Ansonia		inthanon		Ansonia inthanon			Least Concern (LC)	TH		5416	https://amphibiaweb.org/species/5416
Anura	Bufonidae		Ansonia		jeetsukumarani	Jeet SukumaranÃ¢â‚¬â„¢s Torrent-Dwelling Toad	Ansonia jeetsukumarani			Data Deficient (DD)	MY		7222	https://amphibiaweb.org/species/7222
Anura	Bufonidae		Ansonia		kanak						ID		9129	https://amphibiaweb.org/species/9129
Anura	Bufonidae		Ansonia		kelabitensis						ID		9128	https://amphibiaweb.org/species/9128
Anura	Bufonidae		Ansonia		khaochangensis	Cave-dwelling stream-toad					TH		8652	https://amphibiaweb.org/species/8652
Anura	Bufonidae		Ansonia		kraensis	Malayan Stream Toad	Ansonia kraensis			Least Concern (LC)	MM,TH		6609	https://amphibiaweb.org/species/6609
Anura	Bufonidae		Ansonia		kyaiktiyoensis	The Golden Rock Slender Toad					MM		9070	https://amphibiaweb.org/species/9070
Anura	Bufonidae		Ansonia		latidisca		Ansonia latidisca			Endangered (EN)	ID		14	https://amphibiaweb.org/species/14
Anura	Bufonidae		Ansonia		latiffi		Ansonia latiffi			Data Deficient (DD)	MY		7221	https://amphibiaweb.org/species/7221
Anura	Bufonidae		Ansonia		latirostra		Ansonia latirostra			Data Deficient (DD)	MY		6816	https://amphibiaweb.org/species/6816
Anura	Bufonidae		Ansonia		leptopus		Ansonia leptopus			Near Threatened (NT)	MY,ID		15	https://amphibiaweb.org/species/15
Anura	Bufonidae		Ansonia		longidigita		Ansonia longidigita			Near Threatened (NT)	MY		16	https://amphibiaweb.org/species/16
Anura	Bufonidae		Ansonia		lumut	Mossy Stream Toad, Kodok lumut					MY		8132	https://amphibiaweb.org/species/8132
Anura	Bufonidae		Ansonia		malayana		Ansonia malayana			Least Concern (LC)	TH,MY		17	https://amphibiaweb.org/species/17
Anura	Bufonidae		Ansonia		mcgregori	McGregor's Toad	Ansonia mcgregori			Vulnerable (VU)	PH		18	https://amphibiaweb.org/species/18
Anura	Bufonidae		Ansonia		minuta		Ansonia minuta			Near Threatened (NT)	ID,MY		19	https://amphibiaweb.org/species/19
Anura	Bufonidae		Ansonia		muelleri	Mueller's Toad	Ansonia muelleri			Vulnerable (VU)	PH		20	https://amphibiaweb.org/species/20
Anura	Bufonidae		Ansonia		penangensis		Ansonia penangensis			Vulnerable (VU)	TH,MY		22	https://amphibiaweb.org/species/22
Anura	Bufonidae		Ansonia		phuketensis						TH		8776	https://amphibiaweb.org/species/8776
Anura	Bufonidae		Ansonia		pilokensis						TH		8775	https://amphibiaweb.org/species/8775
Anura	Bufonidae		Ansonia		platysoma		Ansonia platysoma			Endangered (EN)	MY		23	https://amphibiaweb.org/species/23
Anura	Bufonidae		Ansonia		siamensis		Ansonia siamensis			Vulnerable (VU)	TH		25	https://amphibiaweb.org/species/25
Anura	Bufonidae		Ansonia		smeagol	Precious Stream-toad					MY		8466	https://amphibiaweb.org/species/8466
Anura	Bufonidae		Ansonia		spinulifer		Ansonia spinulifer			Near Threatened (NT)	MY		26	https://amphibiaweb.org/species/26
Anura	Bufonidae		Ansonia		teneritas	Gracile Slender Toad					MY		8600	https://amphibiaweb.org/species/8600
Anura	Bufonidae		Ansonia		thinthinae	Thin Thin's Stream Toad	Ansonia thinthinae			Endangered (EN)	MM		7767	https://amphibiaweb.org/species/7767
Anura	Bufonidae		Ansonia		tiomanica		Ansonia tiomanica			Vulnerable (VU)	MY		27	https://amphibiaweb.org/species/27
Anura	Bufonidae		Ansonia		torrentis		Ansonia torrentis			Vulnerable (VU)	MY		28	https://amphibiaweb.org/species/28
Anura	Bufonidae		Ansonia		vidua	Murud Black Slender Toad					MY		8194	https://amphibiaweb.org/species/8194
Anura	Bufonidae		Atelopus		andinus		Atelopus andinus			Critically Endangered (CR)	PE		5537	https://amphibiaweb.org/species/5537
Anura	Bufonidae		Atelopus		angelito		Atelopus angelito			Critically Endangered (CR)	CO,EC		5418	https://amphibiaweb.org/species/5418
Anura	Bufonidae		Atelopus		ardila		Atelopus ardila			Critically Endangered (CR)	CO		7533	https://amphibiaweb.org/species/7533
Anura	Bufonidae		Atelopus		arsyecue		Atelopus arsyecue			Critically Endangered (CR)	CO		5538	https://amphibiaweb.org/species/5538
Anura	Bufonidae		Atelopus		arthuri		Atelopus arthuri			Critically Endangered (CR)	EC		32	https://amphibiaweb.org/species/32
Anura	Bufonidae		Atelopus		balios		Atelopus balios			Critically Endangered (CR)	EC		33	https://amphibiaweb.org/species/33
Anura	Bufonidae		Atelopus		barbotini						GF		7796	https://amphibiaweb.org/species/7796
Anura	Bufonidae		Atelopus		bomolochos		Atelopus bomolochos			Critically Endangered (CR)	EC		34	https://amphibiaweb.org/species/34
Anura	Bufonidae		Atelopus		boulengeri		Atelopus boulengeri	Atelopus bicolor	Atelopus bicolor	Critically Endangered (CR)	EC		35	https://amphibiaweb.org/species/35
Anura	Bufonidae		Atelopus		carauta		Atelopus carauta			Data Deficient (DD)	CO		36	https://amphibiaweb.org/species/36
Anura	Bufonidae		Atelopus		carbonerensis		Atelopus carbonerensis			Critically Endangered (CR)	VE		37	https://amphibiaweb.org/species/37
Anura	Bufonidae		Atelopus		carrikeri		Atelopus carrikeri			Endangered (EN)	CO		38	https://amphibiaweb.org/species/38
Anura	Bufonidae		Atelopus		certus		Atelopus certus			Endangered (EN)	PA		39	https://amphibiaweb.org/species/39
Anura	Bufonidae		Atelopus		chiriquiensis	Chiriqui Harlequin Frog	Atelopus chiriquiensis			Critically Endangered (CR)	PA,CR		40	https://amphibiaweb.org/species/40
Anura	Bufonidae		Atelopus		chirripoensis		Atelopus chirripoensis			Critically Endangered (CR)	CR		7283	https://amphibiaweb.org/species/7283
Anura	Bufonidae		Atelopus		chocoensis		Atelopus chocoensis			Critically Endangered (CR)	CO		5539	https://amphibiaweb.org/species/5539
Anura	Bufonidae		Atelopus		chrysocorallus		Atelopus chrysocorallus			Critically Endangered (CR)	VE		41	https://amphibiaweb.org/species/41
Anura	Bufonidae		Atelopus		coynei	Faisanes Stubfoot Toad	Atelopus coynei			Critically Endangered (CR)	EC		42	https://amphibiaweb.org/species/42
Anura	Bufonidae		Atelopus		cruciger	Rancho Grande Harlequin Frog	Atelopus cruciger			Critically Endangered (CR)	VE		43	https://amphibiaweb.org/species/43
Anura	Bufonidae		Atelopus		dimorphus		Atelopus dimorphus			Endangered (EN)	PE		6250	https://amphibiaweb.org/species/6250
Anura	Bufonidae		Atelopus		ebenoides		Atelopus ebenoides			Critically Endangered (CR)	CO		44	https://amphibiaweb.org/species/44
Anura	Bufonidae		Atelopus		elegans		Atelopus elegans			Critically Endangered (CR)	EC,CO		45	https://amphibiaweb.org/species/45
Anura	Bufonidae		Atelopus		epikeisthos		Atelopus epikeisthos			Critically Endangered (CR)	PE		6728	https://amphibiaweb.org/species/6728
Anura	Bufonidae		Atelopus		erythropus		Atelopus erythropus			Critically Endangered (CR)	PE		46	https://amphibiaweb.org/species/46
Anura	Bufonidae		Atelopus		eusebianus		Atelopus eusebianus			Critically Endangered (CR)	CO		47	https://amphibiaweb.org/species/47
Anura	Bufonidae		Atelopus		eusebiodiazi		Atelopus eusebiodiazi			Critically Endangered (CR)	PE		7186	https://amphibiaweb.org/species/7186
Anura	Bufonidae		Atelopus		exiguus		Atelopus exiguus			Critically Endangered (CR)	EC		5336	https://amphibiaweb.org/species/5336
Anura	Bufonidae		Atelopus		famelicus		Atelopus famelicus			Critically Endangered (CR)	CO		49	https://amphibiaweb.org/species/49
Anura	Bufonidae		Atelopus		farci		Atelopus farci			Critically Endangered (CR)	CO		48	https://amphibiaweb.org/species/48
Anura	Bufonidae		Atelopus		flavescens		Atelopus flavescens			Vulnerable (VU)	BR,GF,GY		50	https://amphibiaweb.org/species/50
Anura	Bufonidae		Atelopus		franciscus		Atelopus franciscus			Vulnerable (VU)	GF		51	https://amphibiaweb.org/species/51
Anura	Bufonidae		Atelopus		galactogaster		Atelopus galactogaster			Data Deficient (DD)	CO		52	https://amphibiaweb.org/species/52
Anura	Bufonidae		Atelopus		gigas		Atelopus gigas			Critically Endangered (CR)	CO		7534	https://amphibiaweb.org/species/7534
Anura	Bufonidae		Atelopus		glyphus	Pirri Harlequin Frog	Atelopus glyphus			Critically Endangered (CR)	PA,CO		53	https://amphibiaweb.org/species/53
Anura	Bufonidae		Atelopus		guanujo	Puca Sapo	Atelopus guanujo			Critically Endangered (CR)	EC		5976	https://amphibiaweb.org/species/5976
Anura	Bufonidae		Atelopus		guitarraensis		Atelopus guitarraensis			Data Deficient (DD)	CO		5936	https://amphibiaweb.org/species/5936
Anura	Bufonidae		Atelopus		halihelos		Atelopus halihelos			Critically Endangered (CR)	EC		54	https://amphibiaweb.org/species/54
Anura	Bufonidae		Atelopus		hoogmoedi						BR,GF,GY,SR		7798	https://amphibiaweb.org/species/7798
Anura	Bufonidae		Atelopus		ignescens	Jambato Toad	Atelopus ignescens	Atelopus carinatus	Atelopus carinatus	Critically Endangered (CR) - Provisional	EC,CO		55	https://amphibiaweb.org/species/55
Anura	Bufonidae		Atelopus		laetissimus	Sierra Nevada Harlequin Frog	Atelopus laetissimus			Endangered (EN)	CO		56	https://amphibiaweb.org/species/56
Anura	Bufonidae		Atelopus		limosus	Limosa Harlequin Frog	Atelopus limosus			Endangered (EN)	PA		5540	https://amphibiaweb.org/species/5540
Anura	Bufonidae		Atelopus		loettersi		Atelopus loettersi			Near Threatened (NT)	PE		7702	https://amphibiaweb.org/species/7702
Anura	Bufonidae		Atelopus		longibrachius		Atelopus longibrachius			Endangered (EN)	CO		58	https://amphibiaweb.org/species/58
Anura	Bufonidae		Atelopus		longirostris		Atelopus longirostris			Extinct (EX)	EC,CO		59	https://amphibiaweb.org/species/59
Anura	Bufonidae		Atelopus		lozanoi		Atelopus lozanoi			Endangered (EN)	CO		5937	https://amphibiaweb.org/species/5937
Anura	Bufonidae		Atelopus		lynchi		Atelopus lynchi			Critically Endangered (CR)	EC		60	https://amphibiaweb.org/species/60
Anura	Bufonidae		Atelopus		manauensis						BR		9247	https://amphibiaweb.org/species/9247
Anura	Bufonidae		Atelopus		mandingues		Atelopus mandingues			Data Deficient (DD)	CO		5938	https://amphibiaweb.org/species/5938
Anura	Bufonidae		Atelopus		marinkellei		Atelopus marinkellei			Endangered (EN)	CO		7799	https://amphibiaweb.org/species/7799
Anura	Bufonidae		Atelopus		mindoensis	Mindo Stubfoot Toad	Atelopus mindoensis			Critically Endangered (CR)	EC		61	https://amphibiaweb.org/species/61
Anura	Bufonidae		Atelopus		minutulus		Atelopus minutulus			Critically Endangered (CR)	CO		62	https://amphibiaweb.org/species/62
Anura	Bufonidae		Atelopus		mittermeieri		Atelopus mittermeieri			Endangered (EN)	CO		6808	https://amphibiaweb.org/species/6808
Anura	Bufonidae		Atelopus		monohernandezii		Atelopus monohernandezii			Critically Endangered (CR)	CO		6618	https://amphibiaweb.org/species/6618
Anura	Bufonidae		Atelopus		mucubajiensis		Atelopus mucubajiensis			Critically Endangered (CR)	VE		63	https://amphibiaweb.org/species/63
Anura	Bufonidae		Atelopus		muisca		Atelopus muisca			Endangered (EN)	CO		64	https://amphibiaweb.org/species/64
Anura	Bufonidae		Atelopus		nahumae		Atelopus nahumae			Endangered (EN)	CO		65	https://amphibiaweb.org/species/65
Anura	Bufonidae		Atelopus		nanay		Atelopus nanay			Critically Endangered (CR)	EC		5977	https://amphibiaweb.org/species/5977
Anura	Bufonidae		Atelopus		nepiozomus		Atelopus nepiozomus			Critically Endangered (CR)	EC		66	https://amphibiaweb.org/species/66
Anura	Bufonidae		Atelopus		nicefori		Atelopus nicefori			Critically Endangered (CR)	CO		67	https://amphibiaweb.org/species/67
Anura	Bufonidae		Atelopus		nocturnus		Atelopus nocturnus			Critically Endangered (CR)	CO		7725	https://amphibiaweb.org/species/7725
Anura	Bufonidae		Atelopus		onorei	OnoreÃ¢â‚¬â„¢s Harlequin Frog	Atelopus onorei			Critically Endangered (CR)	EC		6969	https://amphibiaweb.org/species/6969
Anura	Bufonidae		Atelopus		orcesi		Atelopus orcesi			Critically Endangered (CR)	EC		7535	https://amphibiaweb.org/species/7535
Anura	Bufonidae		Atelopus		oxapampae		Atelopus oxapampae			Endangered (EN)	PE		7225	https://amphibiaweb.org/species/7225
Anura	Bufonidae		Atelopus		oxyrhynchus	Rednose Stubfoot Toad	Atelopus oxyrhynchus			Critically Endangered (CR)	VE		68	https://amphibiaweb.org/species/68
Anura	Bufonidae		Atelopus		pachydermus		Atelopus pachydermus			Critically Endangered (CR)	CO,EC,PE		69	https://amphibiaweb.org/species/69
Anura	Bufonidae		Atelopus		palmatus		Atelopus palmatus			Data Deficient (DD)	EC		70	https://amphibiaweb.org/species/70
Anura	Bufonidae		Atelopus		pastuso		Atelopus pastuso			Critically Endangered (CR)	CO,EC		7536	https://amphibiaweb.org/species/7536
Anura	Bufonidae		Atelopus		patazensis	Harlequin frog	Atelopus patazensis			Critically Endangered (CR)	PE		7185	https://amphibiaweb.org/species/7185
Anura	Bufonidae		Atelopus		pedimarmoratus		Atelopus pedimarmoratus			Critically Endangered (CR)	CO		71	https://amphibiaweb.org/species/71
Anura	Bufonidae		Atelopus		peruensis		Atelopus peruensis			Critically Endangered (CR)	PE		72	https://amphibiaweb.org/species/72
Anura	Bufonidae		Atelopus		petersi		Atelopus petersi			Critically Endangered (CR)	EC		6970	https://amphibiaweb.org/species/6970
Anura	Bufonidae		Atelopus		petriruizi		Atelopus petriruizi			Critically Endangered (CR)	CO		5419	https://amphibiaweb.org/species/5419
Anura	Bufonidae		Atelopus		pictiventris		Atelopus pictiventris			Critically Endangered (CR)	CO		73	https://amphibiaweb.org/species/73
Anura	Bufonidae		Atelopus		pinangoi		Atelopus pinangoi			Critically Endangered (CR)	VE		74	https://amphibiaweb.org/species/74
Anura	Bufonidae		Atelopus		planispina		Atelopus planispina			Critically Endangered (CR)	EC		75	https://amphibiaweb.org/species/75
Anura	Bufonidae		Atelopus		podocarpus		Atelopus podocarpus			Critically Endangered (CR)	EC,PE		7537	https://amphibiaweb.org/species/7537
Anura	Bufonidae		Atelopus		pulcher		Atelopus pulcher			Critically Endangered (CR)	PE		6067	https://amphibiaweb.org/species/6067
Anura	Bufonidae		Atelopus		pyrodactylus		Atelopus pyrodactylus			Critically Endangered (CR)	PE		6803	https://amphibiaweb.org/species/6803
Anura	Bufonidae		Atelopus		quimbaya		Atelopus quimbaya			Critically Endangered (CR)	CO		76	https://amphibiaweb.org/species/76
Anura	Bufonidae		Atelopus		reticulatus		Atelopus reticulatus			Critically Endangered (CR)	PE		6059	https://amphibiaweb.org/species/6059
Anura	Bufonidae		Atelopus		sanjosei		Atelopus sanjosei			Data Deficient (DD)	CO		77	https://amphibiaweb.org/species/77
Anura	Bufonidae		Atelopus		seminiferus		Atelopus seminiferus			Critically Endangered (CR)	PE		78	https://amphibiaweb.org/species/78
Anura	Bufonidae		Atelopus		senex		Atelopus senex			Critically Endangered (CR)	CR		79	https://amphibiaweb.org/species/79
Anura	Bufonidae		Atelopus		sernai		Atelopus sernai			Critically Endangered (CR)	CO		80	https://amphibiaweb.org/species/80
Anura	Bufonidae		Atelopus		simulatus		Atelopus simulatus			Critically Endangered (CR)	CO		81	https://amphibiaweb.org/species/81
Anura	Bufonidae		Atelopus		siranus		Atelopus siranus			Data Deficient (DD)	PE		5907	https://amphibiaweb.org/species/5907
Anura	Bufonidae		Atelopus		sonsonensis		Atelopus sonsonensis			Critically Endangered (CR)	CO		5541	https://amphibiaweb.org/species/5541
Anura	Bufonidae		Atelopus		sorianoi		Atelopus sorianoi			Critically Endangered (CR)	VE		82	https://amphibiaweb.org/species/82
Anura	Bufonidae		Atelopus		spumarius		Atelopus spumarius			Vulnerable (VU)	BR,CO,EC,GF,GY,PE,SR		83	https://amphibiaweb.org/species/83
Anura	Bufonidae		Atelopus		spurrelli		Atelopus spurrelli			Near Threatened (NT)	CO		84	https://amphibiaweb.org/species/84
Anura	Bufonidae		Atelopus		subornatus		Atelopus subornatus			Critically Endangered (CR)	CO		85	https://amphibiaweb.org/species/85
Anura	Bufonidae		Atelopus		tamaense		Atelopus tamaense		Atelopus tamaense	Critically Endangered (CR)	VE		86	https://amphibiaweb.org/species/86
Anura	Bufonidae		Atelopus		tricolor	Tri-Colored Harlequin frog	Atelopus tricolor	Atelopus rugulosus, Atelopus willimani	Atelopus rugulosus, Atelopus willimani	Vulnerable (VU)	BO,PE		87	https://amphibiaweb.org/species/87
Anura	Bufonidae		Atelopus		varius	Harlequin Frog, Clown Frog	Atelopus varius			Critically Endangered (CR)	CO,PA,CR		88	https://amphibiaweb.org/species/88
Anura	Bufonidae		Atelopus		vermiculatus		Atelopus flavescens	Atelopus flavescens		Vulnerable (VU)	GF		7797	https://amphibiaweb.org/species/7797
Anura	Bufonidae		Atelopus		vogli		Atelopus vogli			Extinct (EX)	VE		6268	https://amphibiaweb.org/species/6268
Anura	Bufonidae		Atelopus		walkeri		Atelopus walkeri			Data Deficient (DD)	CO		89	https://amphibiaweb.org/species/89
Anura	Bufonidae		Atelopus		zeteki	Panamanian Golden Frog	Atelopus zeteki			Critically Endangered (CR)	PA		91	https://amphibiaweb.org/species/91
Anura	Bufonidae		Barbarophryne		brongersmai		Barbarophryne brongersmai	Bufo brongersmai	Bufo brongersmai	Near Threatened (NT)	DZ,MA,EH		125	https://amphibiaweb.org/species/125
Anura	Bufonidae		Blythophryne		beryet	Andaman Bush Toad				Endangered (EN) - Provisional	IN		8441	https://amphibiaweb.org/species/8441
Anura	Bufonidae		Bufo		ailaoanus		Bufo ailaoanus			Data Deficient (DD)	CN		96	https://amphibiaweb.org/species/96
Anura	Bufonidae		Bufo		aspinius		Bufo aspinius	Torrentophryne aspinia, Phrynoidis aspinia	Torrentophryne aspinia, Phrynoidis aspinia	Data Deficient (DD)	CN		5998	https://amphibiaweb.org/species/5998
Anura	Bufonidae		Bufo		bankorensis	Taiwan Common Toad	Bufo bankorensis			Least Concern (LC)	TW		113	https://amphibiaweb.org/species/113
Anura	Bufonidae		Bufo		bufo	Common Toad	Bufo bufo			Least Concern (LC)	AL,AT,BY,BE,BA,BG,HR,CZ,DK,EE,FI,FR,DE,GI,GR,HU,IT,KZ,LV,LI,LT,LU,MK,MD,ME,NL,NO,PL,RO,RU,RS,SK,SI,SE,CH,TR,UA,GB		127	https://amphibiaweb.org/species/127
Anura	Bufonidae		Bufo		cryptotympanicus		Bufo cryptotympanicus			Near Threatened (NT)	CN,VN		154	https://amphibiaweb.org/species/154
Anura	Bufonidae		Bufo		eichwaldi	Eichwald's Toad, Talysh Toad	Bufo eichwaldi			Vulnerable (VU)	AZ,IR		7152	https://amphibiaweb.org/species/7152
Anura	Bufonidae		Bufo		gargarizans	Asiatic Toad	Bufo gargarizans	Bufo minshanicus, Bufo wolongensis, Bufo kabischi, Bufo tibetanus, Bufo andrewsi	Bufo andrewsi	Least Concern (LC)	RU,KR,KP,JP,CN		179	https://amphibiaweb.org/species/179
Anura	Bufonidae		Bufo		japonicus	Japanese Common Toad, Nihon-hikigaeru, Azuma-hikigaeru	Bufo japonicus			Least Concern (LC)	JP		204	https://amphibiaweb.org/species/204
Anura	Bufonidae		Bufo		luchunnicus						CN,VN		7297	https://amphibiaweb.org/species/7297
Anura	Bufonidae		Bufo		menglianus						CN		7298	https://amphibiaweb.org/species/7298
Anura	Bufonidae		Bufo		pageoti		Bufo pageoti	Bufo burmanus	Bufo burmanus	Near Threatened (NT)	CN,MM,VN		245	https://amphibiaweb.org/species/245
Anura	Bufonidae		Bufo		spinosus	Spiny Toad, Spiny Common Toad				Least Concern (LC)	DZ,AD,FR,MA,PT,ES,TN,GB		7754	https://amphibiaweb.org/species/7754
Anura	Bufonidae		Bufo		stejnegeri	Stejneger's Toad, Korean Toad, Water Toad	Bufo stejnegeri			Least Concern (LC)	CN,KP,KR		282	https://amphibiaweb.org/species/282
Anura	Bufonidae		Bufo		torrenticola	Japanese Stream Toad	Bufo torrenticola			Least Concern (LC)	JP		296	https://amphibiaweb.org/species/296
Anura	Bufonidae		Bufo		tuberculatus	Qinghai Lake Toad	Bufo tuberculatus			Near Threatened (NT)	CN		298	https://amphibiaweb.org/species/298
Anura	Bufonidae		Bufo		tuberospinius						CN		7299	https://amphibiaweb.org/species/7299
Anura	Bufonidae		Bufo		verrucosissimus	Caucasian Toad	Bufo verrucosissimus			Near Threatened (NT)	AZ,GE,LB,RU,SY,TR		309	https://amphibiaweb.org/species/309
Anura	Bufonidae		Bufoides		kempi		Pedostibes kempi	Pedostibes kempi		Data Deficient (DD)	BD,IN		386	https://amphibiaweb.org/species/386
Anura	Bufonidae		Bufoides		meghalayanus		Bufoides meghalayanus			Endangered (EN)	IN		317	https://amphibiaweb.org/species/317
Anura	Bufonidae		Bufotes		balearicus		Bufotes balearicus			Least Concern (LC)	FR,IT,ES		7083	https://amphibiaweb.org/species/7083
Anura	Bufonidae		Bufotes		baturae						AF,PK,TJ		7801	https://amphibiaweb.org/species/7801	This is a triploid species thought to have been derived by hybridization of diploid B. shaartusiensis and diploid B. latastii (see several publications by Stoeck and coauthors: Evolution 2006 Mol Phyl Evo, 2010 Evol, 2012 PRSB, 2015 Heredity, 2015 J Biog.).
Anura	Bufonidae		Bufotes		boulengeri	Sicilian Green Toad, Rospo smeraldino siciliano, Sizilianische WechselkrÃƒÂ¶te, crapaud vert de Sicile, Sapo verde siciliano	Bufotes boulengeri	Bufo boulengeri, Bufotes siculus		Least Concern (LC)	DZ,EG,IT,LY,MA,TN		7081	https://amphibiaweb.org/species/7081	The toads discovered on Sicily and a few additional Mediterranean islands and assigned to <i>Bufotes siculus</i> were reduced to a subspecies of the otherwise exclusively African <i>Bufotes boulengeri</i> by Dufresnes, Mazepa, Jablonski, Oliveira, Wenseleers, Shabanov, Auer, Ernst, Koch, RamÃƒÂ­rez-Chaves, Mulder, Simonovo,Tiutenko, Kryvokhyzhar, Wennekes, Zinenko, Korshunov, Al-Johany, Peregonts…
Anura	Bufonidae		Bufotes		cypriensis	Cyprus Green Toad (English), KÃÂ¸ÃÂ¿pcÃÂºaÃ‘Â ÃÂ·eÃÂ»eÃŒË†ÃÂ½aÃ‘Â ÃÂ¶aÃÂ±a = Kiprskaya zelyonaya zhaba (Russian), ÃÅ¡iÃÂ¿pcÃ‘Å’ÃÂºa ÃÂ·eÃÂ»eÃÂ½a poÃÂ¿yxa = Kiprska zelena ropucha (Ukrainian), ro- pucha cyperskaÃŒÂ (Slovak), Crapaud Vert de Chypre (French), ropucha kyperskaÃŒÂ (Czech), Sapo verde de Chipre (Spanish), ÃŽÅ¡Ãâ€¦Ãâ‚¬ÃÂÃŽÂ¹ÃŽÂ±ÃŽÂºÃŽÂ¿ÃŒÂÃâ€š ÃŽ ÃÂÃŽÂ±ÃÆ’ÃŽÂ…					CY		9101	https://amphibiaweb.org/species/9101
Anura	Bufonidae		Bufotes		latastii	Ladakh Toad	Bufotes latastii	Bufo latastii	Bufo latastii	Least Concern (LC)	AF,IN,PK		218	https://amphibiaweb.org/species/218	This is a diploid species thought to have been involved in the origin of B. baturae by hybridization with B. shaartusiensis (see several publications by Stoeck and coauthors: Evolution 2006 Mol Phyl Evo, 2010 Evol, 2012 PRSB, 2015 Heredity, 2015 J Biog.).
Anura	Bufonidae		Bufotes		luristanicus		Bufotes luristanicus	Bufo luristanicus	Bufo luristanicus	Least Concern (LC)	IR		5940	https://amphibiaweb.org/species/5940
Anura	Bufonidae		Bufotes		oblongus		Bufotes oblongus	Bufo oblongus	Bufo oblongus	Least Concern (LC)	AF,IR,TM		5941	https://amphibiaweb.org/species/5941	This tetraploid species is thought to have originated from hybridization between B. latastii and B. turanensis, both diploids ((see several publications by Stoeck and coauthors: Evolution 2006 Mol Phyl Evo, 2010 Evol, 2012 PRSB, 2015 Heredity, 2015 J Biog.).
Anura	Bufonidae		Bufotes		perrini	PerrinÃ¢â‚¬â„¢s Green Toad (English), Ãâ€”eÃÂ»eÃÂ½a poÃÂ¿yxa ÃÅ¸eppeÃÂ½a = Zelena ropucha Perrena (Ukrainian), Ãâ€”eÃÂ»eÃŒË†ÃÂ½aÃ‘Â ÃÂ¶aÃÂ±a ÃÅ¸eppeÃÂ½a = Zelyonaya zhaba Perrena (Russian), ropucha Perrinova (Czech and Slovak), Crapaud Vert de Perrin (French), Sapo verde de Perrin (Spanish), Perrin qurbaqa (Uzbek)					AF,IR,KZ,TM,UZ		9102	https://amphibiaweb.org/species/9102
Anura	Bufonidae		Bufotes		pewzowi		Bufotes pewzowi	Bufo taxkorensis, Bufo pewzowi	Bufo pewzowi	Least Concern (LC)	CN,KZ,KG,MN,TJ,UZ		5942	https://amphibiaweb.org/species/5942	This tetraploid species is thought to have originated by hybridization of diploid B. latastii with diploid B. turanensis (see several publications by Stoeck and coauthors: Evolution 2006 Mol Phyl Evo, 2010 Evol, 2012 PRSB, 2015 Heredity, 2015 J Biog.).
Anura	Bufonidae		Bufotes		pseudoraddei	Swat Green Toad, Swati gauk	Bufotes pseudoraddei	Bufotes zamdaensis, Bufo pseudoraddei, Bufo viridis pseudoraddei, Bufo latastii pseudoraddei	Bufo pseudoraddei, Bufo viridis pseudoraddei, Bufo latastii pseudoraddei	Least Concern (LC)	AF,PK		5943	https://amphibiaweb.org/species/5943	This is a triploid species of complex orgin, but likely involving hybridization of two related diploid species (see several publications by Stoeck and coauthors: Evolution 2006 Mol Phyl Evo, 2010 Evol, 2012 PRSB, 2015 Heredity, 2015 J Biog.).
Anura	Bufonidae		Bufotes		sitibundus						AM,AZ,GE,GR,IR,IQ,JO,KZ,LB,SA,SY,TR		9103	https://amphibiaweb.org/species/9103
Anura	Bufonidae		Bufotes		surdus	Iranian Toad	Bufotes surdus	Bufo surdus	Bufo surdus	Least Concern (LC)	PK,IR		288	https://amphibiaweb.org/species/288
Anura	Bufonidae		Bufotes		turanensis		Bufotes turanensis	Bufo turanensis, Bufotes shaartusiensis		Least Concern (LC)	IR,KZ,TJ,TM,UZ		7084	https://amphibiaweb.org/species/7084	This diploid species is thought to have been involved in the origins of tetraploid B. pewzowi by hybridization with diploid B. turanensis, with tetraploid B. oblongus by an independent hybridization event with B. turanensis, and with triploid B. baturae by yet a third hybridization event with B. turanensis (see several publications by Stoeck and coauthors: Evolution 2006 Mol Phyl Evo, 2010 Evol, …
Anura	Bufonidae		Bufotes		viridis	Green Toad	Bufotes viridis	Pseudepidalea viridis, Bufotes variabilis, Bufo viridis	Bufo viridis	Least Concern (LC)	AL,AT,BY,BA,BG,HR,CZ,EE,FR,DE,GR,HU,IT,KZ,LV,LT,MD,ME,PL,RO,RU,RS,SK,SI,ES,CH,UA		312	https://amphibiaweb.org/species/312
Anura	Bufonidae		Bufotes		zugmayeri		Bufotes zugmayeri	Bufo zugmayeri		Least Concern (LC)	PK		7082	https://amphibiaweb.org/species/7082	This is thought to be a triploid species that originated by hybridization of two related diploid species, one likely B. turanensis (see several publications by Stoeck and coauthors: Evolution 2006 Mol Phyl Evo, 2010 Evol, 2012 PRSB, 2015 Heredity, 2015 J Biog.).
Anura	Bufonidae		Capensibufo		deceptus	Deception Peak Mountain Toadlet	Capensibufo deceptus			Data Deficient (DD)	ZA		8583	https://amphibiaweb.org/species/8583
Anura	Bufonidae		Capensibufo		magistratus	Landdroskop Mountain Toadlet	Capensibufo magistratus			Data Deficient (DD)	ZA		8584	https://amphibiaweb.org/species/8584
Anura	Bufonidae		Capensibufo		rosei	Rose's Toad, RoseÃ¢â‚¬â„¢s Mountain Toad, RoseÃ¢â‚¬â„¢s Toadlet, Striped Mountain Toad, and Cape Mountain Toad	Capensibufo rosei			Critically Endangered (CR)	ZA		319	https://amphibiaweb.org/species/319
Anura	Bufonidae		Capensibufo		selenophos	Moonlight Mountain Toadlet	Capensibufo selenophos			Data Deficient (DD)	ZA		8585	https://amphibiaweb.org/species/8585
Anura	Bufonidae		Capensibufo		tradouwi	Tradouw's Toad	Capensibufo tradouwi			Least Concern (LC)	ZA		320	https://amphibiaweb.org/species/320
Anura	Bufonidae		Churamiti		maridadi		Churamiti maridadi			Critically Endangered (CR)	TZ		6620	https://amphibiaweb.org/species/6620
Anura	Bufonidae		Dendrophryniscus		berthalutzae		Dendrophryniscus berthalutzae			Least Concern (LC)	BR		324	https://amphibiaweb.org/species/324
Anura	Bufonidae		Dendrophryniscus		brevipollicatus		Dendrophryniscus brevipollicatus			Least Concern (LC)	BR		326	https://amphibiaweb.org/species/326
Anura	Bufonidae		Dendrophryniscus		carvalhoi		Dendrophryniscus carvalhoi			Endangered (EN)	BR		327	https://amphibiaweb.org/species/327
Anura	Bufonidae		Dendrophryniscus		davori						BR		9042	https://amphibiaweb.org/species/9042
Anura	Bufonidae		Dendrophryniscus		haddadi						BR		9043	https://amphibiaweb.org/species/9043
Anura	Bufonidae		Dendrophryniscus		imitator						BR		9040	https://amphibiaweb.org/species/9040
Anura	Bufonidae		Dendrophryniscus		izecksohni						BR		9045	https://amphibiaweb.org/species/9045
Anura	Bufonidae		Dendrophryniscus		jureia						BR		9044	https://amphibiaweb.org/species/9044
Anura	Bufonidae		Dendrophryniscus		krausae		Dendrophryniscus krausae			Data Deficient (DD)	BR		7179	https://amphibiaweb.org/species/7179
Anura	Bufonidae		Dendrophryniscus		lauroi						BR		9041	https://amphibiaweb.org/species/9041
Anura	Bufonidae		Dendrophryniscus		leucomystax		Dendrophryniscus leucomystax			Least Concern (LC)	BR		328	https://amphibiaweb.org/species/328
Anura	Bufonidae		Dendrophryniscus		oreites						BR		7557	https://amphibiaweb.org/species/7557
Anura	Bufonidae		Dendrophryniscus		organensis						BR		7556	https://amphibiaweb.org/species/7556
Anura	Bufonidae		Dendrophryniscus		proboscideus		Dendrophryniscus proboscideus	Rhinella boulengeri, Rhinella proboscidea	Rhinella proboscidea	Data Deficient (DD)	EC,BR		259	https://amphibiaweb.org/species/259
Anura	Bufonidae		Dendrophryniscus		skuki						BR		7931	https://amphibiaweb.org/species/7931
Anura	Bufonidae		Dendrophryniscus		stawiarskyi		Dendrophryniscus stawiarskyi			Data Deficient (DD)	BR		330	https://amphibiaweb.org/species/330
Anura	Bufonidae		Didynamipus		sjostedti	Four-digit Toad	Didynamipus sjostedti			Vulnerable (VU)	CM,GQ,NG		332	https://amphibiaweb.org/species/332
Anura	Bufonidae		Duttaphrynus		atukoralei	Atukorale's Dwarf Toad	Duttaphrynus atukoralei			Least Concern (LC)	LK		112	https://amphibiaweb.org/species/112
Anura	Bufonidae		Duttaphrynus		beddomii		Duttaphrynus beddomii			Endangered (EN)	IN		115	https://amphibiaweb.org/species/115
Anura	Bufonidae		Duttaphrynus		brevirostris		Duttaphrynus brevirostris			Data Deficient (DD)	IN		124	https://amphibiaweb.org/species/124
Anura	Bufonidae		Duttaphrynus		chandai	Nagaland Montane Torrent Toad					IN		8009	https://amphibiaweb.org/species/8009
Anura	Bufonidae		Duttaphrynus		crocus		Duttaphrynus crocus	Bufo crocus	Bufo crocus	Data Deficient (DD)	MM		6415	https://amphibiaweb.org/species/6415
Anura	Bufonidae		Duttaphrynus		cyphosus	Projective-Occiputed Toad	Duttaphrynus himalayanus	Duttaphrynus himalayanus, Bufo cyphosus	Bufo cyphosus	Least Concern (LC)	CN		6002	https://amphibiaweb.org/species/6002
Anura	Bufonidae		Duttaphrynus		dhufarensis		Duttaphrynus dhufarensis			Least Concern (LC)	AE,YE,SA,OM		160	https://amphibiaweb.org/species/160
Anura	Bufonidae		Duttaphrynus		himalayanus	Himalayan Toad	Duttaphrynus himalayanus	Bufo himalayanus, Bufo abatus	Bufo himalayanus, Bufo abatus	Least Concern (LC)	BT,CN,IN,NP,PK		193	https://amphibiaweb.org/species/193
Anura	Bufonidae		Duttaphrynus		hololius	GÃƒÂ¼ntherÃ¢â‚¬â„¢s toad or rock toad	Duttaphrynus hololius			Data Deficient (DD)	IN		196	https://amphibiaweb.org/species/196
Anura	Bufonidae		Duttaphrynus		kiphirensis			Bufo kiphirensis			IN		7323	https://amphibiaweb.org/species/7323
Anura	Bufonidae		Duttaphrynus		kotagamai	Kotagama's Dwarf Toad	Duttaphrynus kotagamai			Endangered (EN)	LK		215	https://amphibiaweb.org/species/215
Anura	Bufonidae		Duttaphrynus		mamitensis		Bufo mamitensis	Bufo mamitensis			IN		7324	https://amphibiaweb.org/species/7324
Anura	Bufonidae		Duttaphrynus		manipurensis			Bufo manipurensis			IN		7325	https://amphibiaweb.org/species/7325
Anura	Bufonidae		Duttaphrynus		melanostictus	Southeast Asian Toad, Asian Common Toad, Spectacled Toad, Asian Black-spined Toad	Duttaphrynus melanostictus	Bufo melanostictus	Bufo melanostictus	Least Concern (LC)	BD,BT,BN,KH,CN,HK,IN,ID,LA,MY,MV,MM,NP,PK,SG,LK,TW,TH,VN		236	https://amphibiaweb.org/species/236
Anura	Bufonidae		Duttaphrynus		microtympanum		Duttaphrynus microtympanum	Bufo microtympanum	Bufo microtympanum	Vulnerable (VU)	IN,NP		238	https://amphibiaweb.org/species/238
Anura	Bufonidae		Duttaphrynus		mizoramensis			Bufo mizoramensis			IN		7326	https://amphibiaweb.org/species/7326
Anura	Bufonidae		Duttaphrynus		nagalandensis			Bufo nagalandensis			IN		7327	https://amphibiaweb.org/species/7327
Anura	Bufonidae		Duttaphrynus		noellerti	Noellert`s Toad	Duttaphrynus noellerti	Bufo noellerti	Bufo noellerti	Endangered (EN)	LK		5422	https://amphibiaweb.org/species/5422
Anura	Bufonidae		Duttaphrynus		olivaceus	Olive Toad	Duttaphrynus olivaceus			Least Concern (LC)	IN,IR,PK		244	https://amphibiaweb.org/species/244
Anura	Bufonidae		Duttaphrynus		parietalis		Duttaphrynus parietalis			Near Threatened (NT)	IN		249	https://amphibiaweb.org/species/249
Anura	Bufonidae		Duttaphrynus		scaber		Duttaphrynus scaber			Least Concern (LC)	IN,LK		6048	https://amphibiaweb.org/species/6048
Anura	Bufonidae		Duttaphrynus		scorteccii		Duttaphrynus scorteccii			Vulnerable (VU)	YE		276	https://amphibiaweb.org/species/276
Anura	Bufonidae		Duttaphrynus		silentvalleyensis		Duttaphrynus silentvalleyensis			Data Deficient (DD)	IN		277	https://amphibiaweb.org/species/277
Anura	Bufonidae		Duttaphrynus		stomaticus	Indus Valley Toad	Duttaphrynus stomaticus			Least Concern (LC)	AF,IN,IR,NP,PK,LK		284	https://amphibiaweb.org/species/284
Anura	Bufonidae		Duttaphrynus		stuarti		Duttaphrynus stuarti			Data Deficient (DD)	BT,IN,MM		285	https://amphibiaweb.org/species/285
Anura	Bufonidae		Duttaphrynus		sumatranus		Duttaphrynus sumatranus			Critically Endangered (CR)	ID		286	https://amphibiaweb.org/species/286
Anura	Bufonidae		Duttaphrynus		totol			Bufo totol			ID		7483	https://amphibiaweb.org/species/7483
Anura	Bufonidae		Duttaphrynus		valhallae		Duttaphrynus valhallae			Data Deficient (DD)	ID		304	https://amphibiaweb.org/species/304
Anura	Bufonidae		Duttaphrynus		wokhaensis			Bufo wokhaensis			IN		7328	https://amphibiaweb.org/species/7328
Anura	Bufonidae		Epidalea		calamita	Natterjack Toad	Epidalea calamita	Bufo calamita	Bufo calamita	Least Concern (LC)	CZ,GB,UA,CH,SE,ES,RU,PT,PL,NL,LU,LT,LV,IE,DE,FR,EE,DK,BE,BY,AT		130	https://amphibiaweb.org/species/130
Anura	Bufonidae		Frostius		erythrophthalmus		Frostius erythrophthalmus			Data Deficient (DD)	BR		6954	https://amphibiaweb.org/species/6954
Anura	Bufonidae		Frostius		pernambucensis		Frostius pernambucensis	Atelopus pernambucensis	Atelopus pernambucensis	Least Concern (LC)	BR		334	https://amphibiaweb.org/species/334
Anura	Bufonidae		Ghatophryne		ornata	Black Torrent Toad, Malabar Torrent Toad	Ghatophryne ornata			Endangered (EN)	IN		21	https://amphibiaweb.org/species/21
Anura	Bufonidae		Ghatophryne		rubigina		Ghatophryne rubigina			Vulnerable (VU)	IN		24	https://amphibiaweb.org/species/24
Anura	Bufonidae		Incilius		alvarius	Sonoran Desert Toad, Colorado River Toad	Incilius alvarius	Bufo alvarius, Phrynoidis alvarius, Cranopsis alvaria	Bufo alvarius, Phrynoidis alvarius, Cranopsis alvaria	Least Concern (LC)	US,MX		97	https://amphibiaweb.org/species/97
Anura	Bufonidae		Incilius		aucoinae		Incilius aucoinae	Bufo aucoinae		Least Concern (LC)	CR,PA		6409	https://amphibiaweb.org/species/6409
Anura	Bufonidae		Incilius		aurarius	Cuchumatan Golden Toad		Bufo aurarius			GT,MX		7956	https://amphibiaweb.org/species/7956
Anura	Bufonidae		Incilius		bocourti		Incilius bocourti	Bufo bocourti	Bufo bocourti	Least Concern (LC)	MX,GT		121	https://amphibiaweb.org/species/121
Anura	Bufonidae		Incilius		campbelli		Incilius campbelli	Bufo campbelli	Bufo campbelli	Near Threatened (NT)	BZ,GT,HN,MX		132	https://amphibiaweb.org/species/132
Anura	Bufonidae		Incilius		canaliferus		Incilius canaliferus	Bufo canaliferus	Bufo canaliferus	Least Concern (LC)	SV,GT,MX		134	https://amphibiaweb.org/species/134
Anura	Bufonidae		Incilius		cavifrons		Incilius cavifrons	Bufo cavifrons	Bufo cavifrons	Endangered (EN)	MX		137	https://amphibiaweb.org/species/137
Anura	Bufonidae		Incilius		chompipe		Incilius chompipe	Bufo chompipe		Vulnerable (VU)	CR		6908	https://amphibiaweb.org/species/6908
Anura	Bufonidae		Incilius		coccifer		Incilius coccifer	Bufo coccifer	Bufo coccifer	Least Concern (LC)	CR,SV,GT,HN,MX,NI		144	https://amphibiaweb.org/species/144
Anura	Bufonidae		Incilius		coniferus	Green Climbing Toad	Incilius coniferus	Bufo gabbi, Bufo coniferus, Bufo ehlersi	Bufo gabbi, Bufo coniferus, Bufo ehlersi	Least Concern (LC)	CO,CR,EC,NI,PA		147	https://amphibiaweb.org/species/147
Anura	Bufonidae		Incilius		cristatus		Incilius cristatus	Bufo cristatus	Bufo cristatus	Critically Endangered (CR)	MX		150	https://amphibiaweb.org/species/150
Anura	Bufonidae		Incilius		cycladen		Incilius cycladen	Bufo cycladen	Bufo cycladen	Vulnerable (VU)	MX		6649	https://amphibiaweb.org/species/6649
Anura	Bufonidae		Incilius		epioticus		Incilius epioticus	Crepidius epioticus	Crepidius epioticus	Least Concern (LC)	PA,CR		322	https://amphibiaweb.org/species/322
Anura	Bufonidae		Incilius		fastidiosus	Pico Blanco Toad	Incilius fastidiosus	Bufo coerulescens, Bufo fastidiosus, Ollotis coerulescens	Bufo coerulescens, Bufo fastidiosus, Ollotis coerulescens	Critically Endangered (CR)	PA,CR		167	https://amphibiaweb.org/species/167
Anura	Bufonidae		Incilius		gemmifer		Incilius gemmifer	Bufo gemmifer	Bufo gemmifer	Endangered (EN)	MX		182	https://amphibiaweb.org/species/182
Anura	Bufonidae		Incilius		guanacaste		Incilius guanacaste	Bufo guanacaste		Data Deficient (DD)	CR		6909	https://amphibiaweb.org/species/6909
Anura	Bufonidae		Incilius		holdridgei	Holdridge's Toad	Incilius holdridgei	Bufo holdridgei	Bufo holdridgei	Critically Endangered (CR)	CR		195	https://amphibiaweb.org/species/195
Anura	Bufonidae		Incilius		ibarrai		Incilius ibarrai	Bufo ibarrai	Bufo ibarrai	Endangered (EN)	GT,HN		199	https://amphibiaweb.org/species/199
Anura	Bufonidae		Incilius		intermedius		Incilius intermedius	Bufo intermedius	Bufo intermedius	Data Deficient (DD)			202	https://amphibiaweb.org/species/202
Anura	Bufonidae		Incilius		karenlipsae			Bufo karenlipsae			PA		7468	https://amphibiaweb.org/species/7468
Anura	Bufonidae		Incilius		leucomyos		Incilius leucomyos	Bufo leucomyos	Bufo leucomyos	Endangered (EN)	HN		6047	https://amphibiaweb.org/species/6047
Anura	Bufonidae		Incilius		luetkenii		Incilius luetkenii	Bufo luetkenii	Bufo luetkenii	Least Concern (LC)	SV,GT,HN,NI,CR		224	https://amphibiaweb.org/species/224
Anura	Bufonidae		Incilius		macrocristatus		Incilius macrocristatus	Bufo macrocristatus, Bufo valliceps macrocristatus, Cranopsis macrocristata	Bufo macrocristatus, Bufo valliceps macrocristatus, Cranopsis macrocristata	Vulnerable (VU)	GT,MX		5544	https://amphibiaweb.org/species/5544
Anura	Bufonidae		Incilius		majordomus			Bufo majordomus			PA		7995	https://amphibiaweb.org/species/7995
Anura	Bufonidae		Incilius		marmoreus		Incilius marmoreus	Bufo marmoreus	Bufo marmoreus	Least Concern (LC)	MX		230	https://amphibiaweb.org/species/230
Anura	Bufonidae		Incilius		mazatlanensis		Incilius mazatlanensis	Bufo mazatlanensis	Bufo mazatlanensis	Least Concern (LC)	MX		232	https://amphibiaweb.org/species/232
Anura	Bufonidae		Incilius		mccoyi	McCoy's Toad		Bufo mccoyi			MX		7660	https://amphibiaweb.org/species/7660
Anura	Bufonidae		Incilius		melanochlorus	Wet Forest Toad, Dark Green Toad	Incilius melanochlorus	Bufo melanochloris, Bufo melanochlorus, Cranopsis melanochlora	Bufo melanochloris, Bufo melanochlorus, Cranopsis melanochlora	Least Concern (LC)	CR,PA		233	https://amphibiaweb.org/species/233
Anura	Bufonidae		Incilius		nebulifer	Gulf Coast Toad, Coastal Plain Toad	Incilius nebulifer	Bufo nebulifer, Chilophryne nebulifera, Cranopsis nebulifer	Bufo nebulifer, Chilophryne nebulifera, Cranopsis nebulifer	Least Concern (LC)	MX,US		6058	https://amphibiaweb.org/species/6058
Anura	Bufonidae		Incilius		occidentalis		Incilius occidentalis	Bufo occidentalis	Bufo occidentalis	Least Concern (LC)	MX		242	https://amphibiaweb.org/species/242
Anura	Bufonidae		Incilius		periglenes	Sapo Dorado, Golden Toad	Incilius periglenes	Bufo periglenes	Bufo periglenes	Extinct (EX)	CR		253	https://amphibiaweb.org/species/253
Anura	Bufonidae		Incilius		peripatetes		Incilius peripatetes	Bufo peripatetes	Bufo peripatetes	Critically Endangered (CR)	PA		254	https://amphibiaweb.org/species/254
Anura	Bufonidae		Incilius		perplexus		Incilius perplexus	Bufo perplexus	Bufo perplexus	Endangered (EN)	MX		255	https://amphibiaweb.org/species/255
Anura	Bufonidae		Incilius		pisinnus		Incilius pisinnus	Bufo pisinnus		Data Deficient (DD)	MX		6613	https://amphibiaweb.org/species/6613
Anura	Bufonidae		Incilius		porteri		Incilius porteri	Bufo porteri		Data Deficient (DD)	HN		6614	https://amphibiaweb.org/species/6614
Anura	Bufonidae		Incilius		signifer		Incilius signifer	Bufo signifer		Least Concern (LC)	PA		6615	https://amphibiaweb.org/species/6615
Anura	Bufonidae		Incilius		spiculatus		Incilius spiculatus	Bufo spiculatus	Bufo spiculatus	Endangered (EN)	MX		5550	https://amphibiaweb.org/species/5550
Anura	Bufonidae		Incilius		tacanensis		Incilius tacanensis	Bufo tacanensis	Bufo tacanensis	Endangered (EN)	GT,MX		289	https://amphibiaweb.org/species/289
Anura	Bufonidae		Incilius		tutelarius		Incilius tutelarius	Bufo tutelarius	Bufo tutelarius	Endangered (EN)	GT,MX		5551	https://amphibiaweb.org/species/5551
Anura	Bufonidae		Incilius		valliceps	Southern Gulf Coast Toad, Gulf Coast Toad	Incilius valliceps	Bufo valliceps, Bufo valliceps valliceps, Bufo trachypus	Bufo valliceps, Bufo valliceps valliceps, Bufo trachypus	Least Concern (LC)	BZ,CR,GT,HN,MX		305	https://amphibiaweb.org/species/305
Anura	Bufonidae		Ingerophrynus		biporcatus	Crested Toad, Kodok Puru Hutan	Ingerophrynus biporcatus	Bufo biporcatus	Bufo biporcatus	Least Concern (LC)	ID		118	https://amphibiaweb.org/species/118
Anura	Bufonidae		Ingerophrynus		celebensis		Ingerophrynus celebensis	Bufo celebensis	Bufo celebensis	Least Concern (LC)	ID		138	https://amphibiaweb.org/species/138
Anura	Bufonidae		Ingerophrynus		claviger		Ingerophrynus claviger	Bufo claviger	Bufo claviger	Endangered (EN)	ID		143	https://amphibiaweb.org/species/143
Anura	Bufonidae		Ingerophrynus		divergens	Crested Toad	Ingerophrynus divergens	Bufo divergens	Bufo divergens	Least Concern (LC)	ID,MY		6003	https://amphibiaweb.org/species/6003
Anura	Bufonidae		Ingerophrynus		galeatus		Ingerophrynus galeatus	Bufo galeatus	Bufo galeatus	Least Concern (LC)	KH,CN,LA,VN		177	https://amphibiaweb.org/species/177
Anura	Bufonidae		Ingerophrynus		gollum		Ingerophrynus gollum			Data Deficient (DD)	MY		6928	https://amphibiaweb.org/species/6928
Anura	Bufonidae		Ingerophrynus		kumquat		Ingerophrynus kumquat	Bufo kumquat	Bufo kumquat	Endangered (EN)	MY		6046	https://amphibiaweb.org/species/6046
Anura	Bufonidae		Ingerophrynus		ledongensis						CN		7800	https://amphibiaweb.org/species/7800
Anura	Bufonidae		Ingerophrynus		macrotis		Ingerophrynus macrotis	Bufo macrotis	Bufo macrotis	Least Concern (LC)	KH,IN,LA,MY,MM,TH,VN		226	https://amphibiaweb.org/species/226
Anura	Bufonidae		Ingerophrynus		parvus	Lesser Toad, Malayan Dwarf Toad, Kodok Puru Kerdil	Ingerophrynus parvus	Bufo parvus	Bufo parvus	Least Concern (LC)	KH,ID,MY,MM,TH		251	https://amphibiaweb.org/species/251
Anura	Bufonidae		Ingerophrynus		philippinicus		Ingerophrynus philippinicus	Bufo philippinicus	Bufo philippinicus	Least Concern (LC)	PH		6056	https://amphibiaweb.org/species/6056
Anura	Bufonidae		Ingerophrynus		quadriporcatus		Ingerophrynus quadriporcatus	Bufo quadriporcatus	Bufo quadriporcatus	Least Concern (LC)	ID,MY,SG		262	https://amphibiaweb.org/species/262
Anura	Bufonidae		Laurentophryne		parkeri		Laurentophryne parkeri			Data Deficient (DD)	CD		336	https://amphibiaweb.org/species/336
Anura	Bufonidae		Leptophryne		borbonica	Hourglass Toad, Cross Toad, Kodok Jam Pasir	Leptophryne borbonica	Cacophryne borbonica	Cacophryne borbonica	Least Concern (LC)	ID,MY,TH		338	https://amphibiaweb.org/species/338
Anura	Bufonidae		Leptophryne		cruentata	Bleeding Toad, Kodok Merah	Leptophryne cruentata			Critically Endangered (CR)	ID		339	https://amphibiaweb.org/species/339
Anura	Bufonidae		Leptophryne		javanica						ID		8883	https://amphibiaweb.org/species/8883
Anura	Bufonidae		Melanophryniscus		admirabilis		Melanophryniscus admirabilis			Critically Endangered (CR)	BR		6758	https://amphibiaweb.org/species/6758
Anura	Bufonidae		Melanophryniscus		alipioi		Melanophryniscus alipioi			Data Deficient (DD)	BR		7181	https://amphibiaweb.org/species/7181
Anura	Bufonidae		Melanophryniscus		atroluteus		Melanophryniscus atroluteus			Least Concern (LC)	AR,BR,PY,UY		341	https://amphibiaweb.org/species/341
Anura	Bufonidae		Melanophryniscus		biancae						BR		8418	https://amphibiaweb.org/species/8418
Anura	Bufonidae		Melanophryniscus		cambaraensis		Melanophryniscus cambaraensis			Data Deficient (DD)	BR		342	https://amphibiaweb.org/species/342
Anura	Bufonidae		Melanophryniscus		cupreuscapularis		Melanophryniscus cupreuscapularis			Near Threatened (NT)	AR		6050	https://amphibiaweb.org/species/6050
Anura	Bufonidae		Melanophryniscus		devincenzii		Melanophryniscus devincenzii			Endangered (EN)	AR,BR,PY,UY		343	https://amphibiaweb.org/species/343
Anura	Bufonidae		Melanophryniscus		dorsalis	Red-Bellied Toad	Melanophryniscus dorsalis			Vulnerable (VU)	BR		6185	https://amphibiaweb.org/species/6185
Anura	Bufonidae		Melanophryniscus		estebani						AR		7350	https://amphibiaweb.org/species/7350
Anura	Bufonidae		Melanophryniscus		fulvoguttatus		Melanophryniscus fulvoguttatus			Least Concern (LC)	AR,BR,PY		6327	https://amphibiaweb.org/species/6327
Anura	Bufonidae		Melanophryniscus		klappenbachi		Melanophryniscus klappenbachi			Least Concern (LC)	AR,PY		6051	https://amphibiaweb.org/species/6051
Anura	Bufonidae		Melanophryniscus		krauczuki		Melanophryniscus krauczuki			Data Deficient (DD)	AR,PY		6342	https://amphibiaweb.org/species/6342
Anura	Bufonidae		Melanophryniscus		langonei		Melanophryniscus langonei			Critically Endangered (CR)	UY		7155	https://amphibiaweb.org/species/7155
Anura	Bufonidae		Melanophryniscus		macrogranulosus		Melanophryniscus macrogranulosus			Vulnerable (VU)	BR		344	https://amphibiaweb.org/species/344
Anura	Bufonidae		Melanophryniscus		milanoi						BR		8419	https://amphibiaweb.org/species/8419
Anura	Bufonidae		Melanophryniscus		montevidensis		Melanophryniscus montevidensis			Vulnerable (VU)	BR,UY		345	https://amphibiaweb.org/species/345
Anura	Bufonidae		Melanophryniscus		moreirae		Melanophryniscus moreirae			Near Threatened (NT)	BR		346	https://amphibiaweb.org/species/346
Anura	Bufonidae		Melanophryniscus		orejasmirandai		Melanophryniscus orejasmirandai			Vulnerable (VU)	UY		347	https://amphibiaweb.org/species/347
Anura	Bufonidae		Melanophryniscus		pachyrhynus		Melanophryniscus pachyrhynus			Data Deficient (DD)	BR,UY		6328	https://amphibiaweb.org/species/6328
Anura	Bufonidae		Melanophryniscus		paraguayensis						PY		7187	https://amphibiaweb.org/species/7187
Anura	Bufonidae		Melanophryniscus		peritus		Melanophryniscus peritus			Critically Endangered (CR)	BR		7847	https://amphibiaweb.org/species/7847
Anura	Bufonidae		Melanophryniscus		rubriventris		Melanophryniscus rubriventris			Least Concern (LC)	AR		348	https://amphibiaweb.org/species/348
Anura	Bufonidae		Melanophryniscus		sanmartini		Melanophryniscus sanmartini			Near Threatened (NT)	BR,UY		349	https://amphibiaweb.org/species/349
Anura	Bufonidae		Melanophryniscus		setiba	Restinga toadlet, sapinho-da-restinga					BR		7952	https://amphibiaweb.org/species/7952
Anura	Bufonidae		Melanophryniscus		simplex		Melanophryniscus simplex			Data Deficient (DD)	BR		6330	https://amphibiaweb.org/species/6330
Anura	Bufonidae		Melanophryniscus		spectabilis		Melanophryniscus spectabilis			Data Deficient (DD)	BR		6331	https://amphibiaweb.org/species/6331
Anura	Bufonidae		Melanophryniscus		stelzneri		Melanophryniscus stelzneri			Least Concern (LC)	PY,BR,AR		350	https://amphibiaweb.org/species/350
Anura	Bufonidae		Melanophryniscus		tumifrons		Melanophryniscus tumifrons			Least Concern (LC)	BR,AR		351	https://amphibiaweb.org/species/351
Anura	Bufonidae		Melanophryniscus		vilavelhensis						BR		7249	https://amphibiaweb.org/species/7249
Anura	Bufonidae		Melanophryniscus		xanthostomus						BR		8420	https://amphibiaweb.org/species/8420
Anura	Bufonidae		Mertensophryne		anotis	Chirinda Toad	Mertensophryne anotis	Stephopaedes anotis	Stephopaedes anotis	Endangered (EN)	ZW,MZ		425	https://amphibiaweb.org/species/425
Anura	Bufonidae		Mertensophryne		howelli		Mertensophryne howelli	Stephopaedes howelli	Stephopaedes howelli	Endangered (EN)	TZ		6053	https://amphibiaweb.org/species/6053
Anura	Bufonidae		Mertensophryne		lindneri		Mertensophryne lindneri	Bufo lindneri	Bufo lindneri	Least Concern (LC)	MZ,MW,TZ		222	https://amphibiaweb.org/species/222
Anura	Bufonidae		Mertensophryne		lonnbergi		Mertensophryne lonnbergi	Bufo lonnbergi	Bufo lonnbergi	Vulnerable (VU)	ZM,MW,TZ,KE		223	https://amphibiaweb.org/species/223
Anura	Bufonidae		Mertensophryne		loveridgei		Mertensophryne loveridgei	Stephopaedes loveridgei	Stephopaedes loveridgei	Least Concern (LC)	MZ,TZ		426	https://amphibiaweb.org/species/426
Anura	Bufonidae		Mertensophryne		melanopleura		Mertensophryne melanopleura	Bufo melanopleura	Bufo melanopleura	Least Concern (LC)	CD,ZM		235	https://amphibiaweb.org/species/235
Anura	Bufonidae		Mertensophryne		micranotis		Mertensophryne micranotis			Least Concern (LC)	KE,MZ,TZ		353	https://amphibiaweb.org/species/353
Anura	Bufonidae		Mertensophryne		mocquardi		Mertensophryne mocquardi	Bufo mocquardi	Bufo mocquardi	Data Deficient (DD)	KE		5546	https://amphibiaweb.org/species/5546
Anura	Bufonidae		Mertensophryne		nairobiensis	Nairobi Toad	Mertensophryne nairobiensis			Data Deficient (DD)	KE		6833	https://amphibiaweb.org/species/6833
Anura	Bufonidae		Mertensophryne		nyikae	Nyika Dwarf Toad	Mertensophryne nyikae	Bufo nyikae, Bufo taitanus nyikae	Bufo nyikae, Bufo taitanus nyikae	Near Threatened (NT)	MW,ZM		5548	https://amphibiaweb.org/species/5548
Anura	Bufonidae		Mertensophryne		schmidti		Mertensophryne schmidti	Bufo schmidti	Bufo schmidti	Data Deficient (DD)	CD		354	https://amphibiaweb.org/species/354
Anura	Bufonidae		Mertensophryne		taitana	Taita Toad	Mertensophryne taitana	Bufo taitanus	Bufo taitanus	Least Concern (LC)	CD,KE,MW,TZ,ZM		290	https://amphibiaweb.org/species/290
Anura	Bufonidae		Mertensophryne		usambarae		Mertensophryne usambarae	Stephopaedes usambarae	Stephopaedes usambarae	Critically Endangered (CR)	TZ		6054	https://amphibiaweb.org/species/6054
Anura	Bufonidae		Mertensophryne		uzunguensis		Mertensophryne uzunguensis	Bufo uzunguensis, Bufo taitanus uzunguensis	Bufo uzunguensis, Bufo taitanus uzunguensis	Vulnerable (VU)	TZ		303	https://amphibiaweb.org/species/303
Anura	Bufonidae		Metaphryniscus		sosai		Metaphryniscus sosai	Metaphryniscus sosae	Metaphryniscus sosae	Vulnerable (VU)	VE		356	https://amphibiaweb.org/species/356
Anura	Bufonidae		Nannophryne		apolobambica		Nannophryne apolobambica			Data Deficient (DD)	BO		6656	https://amphibiaweb.org/species/6656
Anura	Bufonidae		Nannophryne		cophotis		Nannophryne cophotis	Bufo cophotis	Bufo cophotis	Least Concern (LC)	PE		148	https://amphibiaweb.org/species/148
Anura	Bufonidae		Nannophryne		corynetes		Nannophryne corynetes	Bufo corynetes	Bufo corynetes	Vulnerable (VU)	PE		149	https://amphibiaweb.org/species/149
Anura	Bufonidae		Nannophryne		variegata		Nannophryne variegata	Bufo variegatus	Bufo variegatus	Least Concern (LC)	AR,CL		306	https://amphibiaweb.org/species/306
Anura	Bufonidae		Nectophryne		afra		Nectophryne afra			Least Concern (LC)	CD,GA,GQ,CM,NG		358	https://amphibiaweb.org/species/358
Anura	Bufonidae		Nectophryne		batesii		Nectophryne batesii			Least Concern (LC)	CM,CF,CD,GA		359	https://amphibiaweb.org/species/359
Anura	Bufonidae		Nectophrynoides		asperginis	Kihansi Spray Toad	Nectophrynoides asperginis			Extinct in the Wild (EW)	TZ		5397	https://amphibiaweb.org/species/5397
Anura	Bufonidae		Nectophrynoides		cryptus		Nectophrynoides cryptus			Endangered (EN)	TZ		361	https://amphibiaweb.org/species/361
Anura	Bufonidae		Nectophrynoides		frontierei		Nectophrynoides frontierei			Data Deficient (DD)	TZ		6333	https://amphibiaweb.org/species/6333
Anura	Bufonidae		Nectophrynoides		laevis		Nectophrynoides laevis			Data Deficient (DD)	TZ		6335	https://amphibiaweb.org/species/6335
Anura	Bufonidae		Nectophrynoides		laticeps		Nectophrynoides laticeps			Critically Endangered (CR)	TZ		6719	https://amphibiaweb.org/species/6719
Anura	Bufonidae		Nectophrynoides		minutus		Nectophrynoides minutus			Endangered (EN)	TZ		362	https://amphibiaweb.org/species/362
Anura	Bufonidae		Nectophrynoides		paulae		Nectophrynoides paulae			Critically Endangered (CR)	TZ		6976	https://amphibiaweb.org/species/6976
Anura	Bufonidae		Nectophrynoides		poyntoni	PoyntonÃ¢â‚¬â„¢s Forest Toad	Nectophrynoides poyntoni			Critically Endangered (CR)	TZ		6336	https://amphibiaweb.org/species/6336
Anura	Bufonidae		Nectophrynoides		pseudotornieri		Nectophrynoides pseudotornieri			Critically Endangered (CR)	TZ		6334	https://amphibiaweb.org/species/6334
Anura	Bufonidae		Nectophrynoides		tornieri	TornierÃ¢â‚¬â„¢s Forest Toad, Kijula	Nectophrynoides tornieri			Least Concern (LC)	TZ		363	https://amphibiaweb.org/species/363
Anura	Bufonidae		Nectophrynoides		vestergaardi	Vestergaard's Forest Toad	Nectophrynoides vestergaardi			Endangered (EN)	TZ		6332	https://amphibiaweb.org/species/6332
Anura	Bufonidae		Nectophrynoides		viviparus		Nectophrynoides viviparus			Least Concern (LC)	TZ		364	https://amphibiaweb.org/species/364
Anura	Bufonidae		Nectophrynoides		wendyae		Nectophrynoides wendyae			Critically Endangered (CR)	TZ		365	https://amphibiaweb.org/species/365
Anura	Bufonidae		Nimbaphrynoides		occidentalis	Western Nimba Toad	Nimbaphrynoides occidentalis	Nimbaphrynoides liberiensis, Nectophrynoides occidentalis	Nectophrynoides occidentalis	Critically Endangered (CR)	GN,CI,LR		368	https://amphibiaweb.org/species/368
Anura	Bufonidae		Oreophrynella		cryptica		Oreophrynella cryptica			Vulnerable (VU)	VE		370	https://amphibiaweb.org/species/370
Anura	Bufonidae		Oreophrynella		dendronastes		Oreophrynella dendronastes			Data Deficient (DD)	GY		6918	https://amphibiaweb.org/species/6918	Kok et al. 2012 Curr Biol 22: R589-R590 consider this species to be a likely synonym of Oreophrynella macconnelli.
Anura	Bufonidae		Oreophrynella		huberi		Oreophrynella huberi			Vulnerable (VU)	VE		371	https://amphibiaweb.org/species/371
Anura	Bufonidae		Oreophrynella		macconnelli		Oreophrynella macconnelli			Vulnerable (VU)	GY,VE		372	https://amphibiaweb.org/species/372
Anura	Bufonidae		Oreophrynella		nigra	Sapito rugoso del KukenÃƒÂ¡n; Venezeulan pebble toad	Oreophrynella nigra			Vulnerable (VU)	VE		373	https://amphibiaweb.org/species/373
Anura	Bufonidae		Oreophrynella		quelchii		Oreophrynella quelchii			Vulnerable (VU)	GY,VE		374	https://amphibiaweb.org/species/374
Anura	Bufonidae		Oreophrynella		seegobini	Seegobin's Tepui Toad					GY		7285	https://amphibiaweb.org/species/7285
Anura	Bufonidae		Oreophrynella		vasquezi		Oreophrynella vasquezi			Vulnerable (VU)	VE		375	https://amphibiaweb.org/species/375
Anura	Bufonidae		Oreophrynella		weiassipuensis		Oreophrynella weiassipuensis			Data Deficient (DD)	BR,GY		6621	https://amphibiaweb.org/species/6621
Anura	Bufonidae		Osornophryne		angel						EC		7605	https://amphibiaweb.org/species/7605
Anura	Bufonidae		Osornophryne		antisana		Osornophryne antisana			Endangered (EN)	CO,EC		377	https://amphibiaweb.org/species/377
Anura	Bufonidae		Osornophryne		bufoniformis		Osornophryne bufoniformis	Atelopus bufoniformis	Atelopus bufoniformis	Near Threatened (NT)	EC,CO		378	https://amphibiaweb.org/species/378
Anura	Bufonidae		Osornophryne		cofanorum		Osornophryne cofanorum			Least Concern (LC)	EC		7522	https://amphibiaweb.org/species/7522
Anura	Bufonidae		Osornophryne		guacamayo		Osornophryne guacamayo			Endangered (EN)	CO,EC		379	https://amphibiaweb.org/species/379
Anura	Bufonidae		Osornophryne		occidentalis						EC		7606	https://amphibiaweb.org/species/7606
Anura	Bufonidae		Osornophryne		percrassa		Osornophryne percrassa			Vulnerable (VU)	CO		380	https://amphibiaweb.org/species/380
Anura	Bufonidae		Osornophryne		puruanta		Osornophryne puruanta			Endangered (EN)	EC		7151	https://amphibiaweb.org/species/7151
Anura	Bufonidae		Osornophryne		simpsoni						EC		7658	https://amphibiaweb.org/species/7658
Anura	Bufonidae		Osornophryne		sumacoensis		Osornophryne sumacoensis			Vulnerable (VU)	EC		381	https://amphibiaweb.org/species/381
Anura	Bufonidae		Osornophryne		talipes		Osornophryne talipes			Endangered (EN)	CO,EC		382	https://amphibiaweb.org/species/382
Anura	Bufonidae		Parapelophryne		scalpta		Parapelophryne scalpta			Endangered (EN)	CN		397	https://amphibiaweb.org/species/397
Anura	Bufonidae		Pedostibes		tuberculosus	Malabar Tree Toad, Warty Asian Tree Toad	Pedostibes tuberculosus			Endangered (EN)	IN		389	https://amphibiaweb.org/species/389
Anura	Bufonidae		Pelophryne		albotaeniata	Palawan Toadlet	Pelophryne albotaeniata			Endangered (EN)	PH		391	https://amphibiaweb.org/species/391
Anura	Bufonidae		Pelophryne		api		Pelophryne api			Endangered (EN)	MY		5554	https://amphibiaweb.org/species/5554
Anura	Bufonidae		Pelophryne		brevipes	Southeast Asian Toadlet	Pelophryne brevipes			Least Concern (LC)	PH		392	https://amphibiaweb.org/species/392
Anura	Bufonidae		Pelophryne		guentheri		Pelophryne guentheri			Vulnerable (VU)	MY		393	https://amphibiaweb.org/species/393
Anura	Bufonidae		Pelophryne		ingeri						ID,MY,SG		9079	https://amphibiaweb.org/species/9079
Anura	Bufonidae		Pelophryne		lighti	Light's Toadlet	Pelophryne lighti			Vulnerable (VU)	PH		394	https://amphibiaweb.org/species/394
Anura	Bufonidae		Pelophryne		linanitensis		Pelophryne linanitensis			Critically Endangered (CR)	MY		7246	https://amphibiaweb.org/species/7246
Anura	Bufonidae		Pelophryne		macrotis		Pelophryne macrotis			Data Deficient (DD)	MY		395	https://amphibiaweb.org/species/395
Anura	Bufonidae		Pelophryne		misera		Pelophryne misera			Vulnerable (VU)	MY		396	https://amphibiaweb.org/species/396
Anura	Bufonidae		Pelophryne		murudensis		Pelophryne murudensis			Critically Endangered (CR)	MY		7245	https://amphibiaweb.org/species/7245
Anura	Bufonidae		Pelophryne		penrissenensis						MY		8668	https://amphibiaweb.org/species/8668
Anura	Bufonidae		Pelophryne		rhopophilia		Pelophryne rhopophilia	Pelophryne rhopophilius	Pelophryne rhopophilius	Vulnerable (VU)	MY		5555	https://amphibiaweb.org/species/5555
Anura	Bufonidae		Pelophryne		saravacensis						MY		7695	https://amphibiaweb.org/species/7695
Anura	Bufonidae		Pelophryne		signata		Pelophryne signata			Near Threatened (NT)	ID,MY		6624	https://amphibiaweb.org/species/6624
Anura	Bufonidae		Peltophryne		armata	Hispaniolan Armoured Toad					DO		8814	https://amphibiaweb.org/species/8814
Anura	Bufonidae		Peltophryne		cataulaciceps	Cuban Pineland Toad	Peltophryne cataulaciceps	Bufo cataulaciceps	Bufo cataulaciceps	Endangered (EN)	CU		399	https://amphibiaweb.org/species/399
Anura	Bufonidae		Peltophryne		dunni	Central Cuban Long-nosed Toad					CU		9075	https://amphibiaweb.org/species/9075
Anura	Bufonidae		Peltophryne		empusa	Cuban Small-eared Toad	Peltophryne empusa	Bufo empusus	Bufo empusus	Vulnerable (VU)	CU		400	https://amphibiaweb.org/species/400
Anura	Bufonidae		Peltophryne		florentinoi	Zapata Toad	Peltophryne florentinoi			Critically Endangered (CR)	CU		6950	https://amphibiaweb.org/species/6950
Anura	Bufonidae		Peltophryne		fluviatica	Hispaniolan Crestless Toad	Peltophryne fluviatica	Bufo fluviaticus	Bufo fluviaticus	Critically Endangered (CR)	DO		401	https://amphibiaweb.org/species/401
Anura	Bufonidae		Peltophryne		fustiger	Western Cuba Giant Toad	Peltophryne fustiger	Bufo fustiger, Bufo peltacephalus fustiger	Bufo fustiger, Bufo peltacephalus fustiger	Least Concern (LC)	CU		6045	https://amphibiaweb.org/species/6045
Anura	Bufonidae		Peltophryne		guentheri	Southern Hispaniola Crested Toad	Peltophryne guentheri	Peltophryne fracta, Bufo guntheri, Bufo guentheri	Bufo guntheri, Bufo guentheri	Vulnerable (VU)	DO,HT		402	https://amphibiaweb.org/species/402
Anura	Bufonidae		Peltophryne		gundlachi	Cuban High-crested Toad	Peltophryne gundlachi	Bufo gundlachi	Bufo gundlachi	Vulnerable (VU)	CU		403	https://amphibiaweb.org/species/403
Anura	Bufonidae		Peltophryne		lemur	Puerto Rican Toad, Puerto Rican Crested Toad, sapo concho	Peltophryne lemur	Bufo lemur	Bufo lemur	Critically Endangered (CR)	PR,VG		404	https://amphibiaweb.org/species/404
Anura	Bufonidae		Peltophryne		longinasus	Western Cuba Long-nosed Toad, Cuban Long-nosed Toad	Peltophryne longinasus	Bufo longinasus	Bufo longinasus	Endangered (EN)	CU		405	https://amphibiaweb.org/species/405
Anura	Bufonidae		Peltophryne		peltocephala	Eastern Cuba Giant Toad, Sapo Timbalero, Sapo	Peltophryne peltocephala	Bufo peltocephalus	Bufo peltocephalus	Least Concern (LC)	CU		406	https://amphibiaweb.org/species/406
Anura	Bufonidae		Peltophryne		ramsdeni	Eastern Cuba Long-nosed Toad					CU		9076	https://amphibiaweb.org/species/9076
Anura	Bufonidae		Peltophryne		taladai	Cuban Spotted Toad, Sapo	Peltophryne taladai	Bufo taladai	Bufo taladai	Vulnerable (VU)	CU		407	https://amphibiaweb.org/species/407
Anura	Bufonidae		Phrynoidis		aspera	River Toad, Rough Toad, Giant Asian Toad, Kodok Buduk Sungal, Kodok Puru Besar	Phrynoidis asper	Phrynoidis asper, Bufo asper	Bufo asper	Least Concern (LC)	BN,ID,MY,MM,TH,VN		110	https://amphibiaweb.org/species/110
Anura	Bufonidae		Phrynoidis		juxtasper		Phrynoidis juxtaspera	Phrynoidis juxtaspera, Bufo juxtasper	Bufo juxtasper	Least Concern (LC)	MY,ID		207	https://amphibiaweb.org/species/207
Anura	Bufonidae		Poyntonophrynus		beiranus		Poyntonophrynus beiranus	Bufo beiranus, Bufo taitanus beiranus	Bufo beiranus, Bufo taitanus beiranus	Least Concern (LC)	MZ,ZM		117	https://amphibiaweb.org/species/117
Anura	Bufonidae		Poyntonophrynus		damaranus		Poyntonophrynus damaranus	Bufo damaranus, Bufo fenoulheti damaranus, Bufo dombensis damaranus	Bufo damaranus, Bufo fenoulheti damaranus, Bufo dombensis damaranus	Data Deficient (DD)	NA		5542	https://amphibiaweb.org/species/5542
Anura	Bufonidae		Poyntonophrynus		dombensis	Dombe Toad	Poyntonophrynus dombensis	Bufo dombensis	Bufo dombensis	Least Concern (LC)	NA,AO		164	https://amphibiaweb.org/species/164
Anura	Bufonidae		Poyntonophrynus		fenoulheti	Fenoulhet's Toad	Poyntonophrynus fenoulheti	Bufo fenoulheti	Bufo fenoulheti	Least Concern (LC)	BW,MZ,NA,ZA,SZ,ZM,ZW		168	https://amphibiaweb.org/species/168
Anura	Bufonidae		Poyntonophrynus		grandisonae		Poyntonophrynus grandisonae	Bufo grandisonae	Bufo grandisonae	Data Deficient (DD)	AO		186	https://amphibiaweb.org/species/186
Anura	Bufonidae		Poyntonophrynus		hoeschi	Hoesch's Toad	Poyntonophrynus hoeschi	Bufo hoeschi	Bufo hoeschi	Least Concern (LC)	NA		194	https://amphibiaweb.org/species/194
Anura	Bufonidae		Poyntonophrynus		kavangensis		Poyntonophrynus kavangensis	Bufo kavangensis	Bufo kavangensis	Least Concern (LC)	ZW,NA,BW,AO		209	https://amphibiaweb.org/species/209
Anura	Bufonidae		Poyntonophrynus		lughensis		Poyntonophrynus lughensis	Bufo lughensis	Bufo lughensis	Least Concern (LC)	ET,KE,SO,SS		225	https://amphibiaweb.org/species/225
Anura	Bufonidae		Poyntonophrynus		pachnodes	Serra da Neve Pygmy Toad, Sapo Pigmeu da Serra da Neve					AO		8893	https://amphibiaweb.org/species/8893
Anura	Bufonidae		Poyntonophrynus		parkeri		Poyntonophrynus parkeri	Bufo parkeri	Bufo parkeri	Least Concern (LC)	TZ,KE		250	https://amphibiaweb.org/species/250
Anura	Bufonidae		Poyntonophrynus		vertebralis	Pygmy Toad	Poyntonophrynus vertebralis	Bufo vertebralis	Bufo vertebralis	Least Concern (LC)	ZA		310	https://amphibiaweb.org/species/310
Anura	Bufonidae		Pseudobufo		subasper		Pseudobufo subasper			Least Concern (LC)	MY,ID		409	https://amphibiaweb.org/species/409
Anura	Bufonidae		Rentapia		everetti	Marbled Tree Toad, EverettÃ¢â‚¬â„¢s Asian Tree Toad		Rentapia rugosa			ID,MY		9180	https://amphibiaweb.org/species/9180
Anura	Bufonidae		Rentapia		flavomaculata						MY,TH		9231	https://amphibiaweb.org/species/9231
Anura	Bufonidae		Rentapia		hosii	Rentap's Asian Tree Toad	Rentapia hosii	Pedostibes hosii		Least Concern (LC)	ID,MY,TH		385	https://amphibiaweb.org/species/385
Anura	Bufonidae		Rhaebo		andinophrynoides			Bufo andinophrynoides			CO,EC		7358	https://amphibiaweb.org/species/7358
Anura	Bufonidae		Rhaebo		atelopoides		Rhaebo atelopoides			Data Deficient (DD)	CO		5	https://amphibiaweb.org/species/5
Anura	Bufonidae		Rhaebo		blombergi		Rhaebo blombergi	Bufo blombergi	Bufo blombergi	Near Threatened (NT)	EC,CO		120	https://amphibiaweb.org/species/120
Anura	Bufonidae		Rhaebo		caeruleostictus		Rhaebo caeruleostictus	Bufo caeruleostictus	Bufo caeruleostictus	Endangered (EN)	EC		129	https://amphibiaweb.org/species/129
Anura	Bufonidae		Rhaebo		colomai		Rhaebo colomai			Critically Endangered (CR)	EC		6	https://amphibiaweb.org/species/6
Anura	Bufonidae		Rhaebo		ecuadorensis						BO,BR,CO,EC,PE		7897	https://amphibiaweb.org/species/7897
Anura	Bufonidae		Rhaebo		glaberrimus		Rhaebo glaberrimus	Bufo glaberrimus	Bufo glaberrimus	Least Concern (LC)	CO,PE,VE		183	https://amphibiaweb.org/species/183
Anura	Bufonidae		Rhaebo		guttatus		Rhaebo guttatus	Bufo guttatus, Bufo melini, Bufo anderssoni	Bufo guttatus, Bufo melini, Bufo anderssoni	Least Concern (LC)	BO,BR,CO,EC,GF,GY,PE,SR,VE		188	https://amphibiaweb.org/species/188
Anura	Bufonidae		Rhaebo		haematiticus		Rhaebo haematiticus	Bufo haematiticus, Bufo melanogaster, Bufo caeruleocellatus	Bufo haematiticus, Bufo melanogaster, Bufo caeruleocellatus	Least Concern (LC)	CO,CR,EC,HN,NI,PA,VE		191	https://amphibiaweb.org/species/191
Anura	Bufonidae		Rhaebo		hypomelas		Rhaebo hypomelas	Bufo hypomelas	Bufo hypomelas	Least Concern (LC)	CO		198	https://amphibiaweb.org/species/198
Anura	Bufonidae		Rhaebo		lynchi		Rhaebo lynchi			Data Deficient (DD)	CO		7018	https://amphibiaweb.org/species/7018
Anura	Bufonidae		Rhaebo		nasicus		Rhaebo nasicus	Bufo nasicus	Bufo nasicus	Least Concern (LC)	GY,VE		240	https://amphibiaweb.org/species/240
Anura	Bufonidae		Rhaebo		olallai		Rhaebo olallai			Data Deficient (DD)	CO,EC		7	https://amphibiaweb.org/species/7
Anura	Bufonidae		Rhinella		abei		Rhinella abei			Least Concern (LC)	BR		6617	https://amphibiaweb.org/species/6617
Anura	Bufonidae		Rhinella		achalensis		Rhinella achalensis	Bufo achalensis	Bufo achalensis	Near Threatened (NT)	AR		94	https://amphibiaweb.org/species/94
Anura	Bufonidae		Rhinella		achavali		Rhinella achavali	Bufo achavali	Bufo achavali	Least Concern (LC)	BR,UY		6281	https://amphibiaweb.org/species/6281
Anura	Bufonidae		Rhinella		acrolopha		Rhinella acrolopha	Rhamphophryne acrolopha	Rhamphophryne acrolopha	Data Deficient (DD)	PA,CO		411	https://amphibiaweb.org/species/411
Anura	Bufonidae		Rhinella	margaritifera	acutirostris		Rhinella acutirostris	Bufo acutirostris	Bufo acutirostris	Least Concern (LC)	BR,CO		95	https://amphibiaweb.org/species/95
Anura	Bufonidae		Rhinella	margaritifera	alata		Rhinella alata	Bufo alatus	Bufo alatus	Data Deficient (DD)	CO,EC,PA		6623	https://amphibiaweb.org/species/6623
Anura	Bufonidae		Rhinella		amabilis		Rhinella amabilis	Bufo amabilis	Bufo amabilis	Critically Endangered (CR)	EC		6102	https://amphibiaweb.org/species/6102
Anura	Bufonidae		Rhinella		amboroensis		Rhinella amboroensis	Bufo amboroensis	Bufo amboroensis	Data Deficient (DD)	BO		99	https://amphibiaweb.org/species/99
Anura	Bufonidae		Rhinella		arborescandens		Rhinella arborescandens	Bufo arborescandens	Bufo arborescandens	Data Deficient (DD)	PE		105	https://amphibiaweb.org/species/105
Anura	Bufonidae		Rhinella		arenarum		Rhinella arenarum	Bufo arenarum	Bufo arenarum	Least Concern (LC)	UY,BR,BO,AR		106	https://amphibiaweb.org/species/106
Anura	Bufonidae		Rhinella		arequipensis			Bufo arequipensis, Chaunus arequipensis, Bufo spinulosus arequipensis	Bufo arequipensis, Chaunus arequipensis, Bufo spinulosus arequipensis		PE		107	https://amphibiaweb.org/species/107
Anura	Bufonidae		Rhinella		arunco		Rhinella arunco	Bufo arunco, Bufo chilensis, Rana arunco	Bufo arunco, Bufo chilensis, Rana arunco	Near Threatened (NT)	CL		108	https://amphibiaweb.org/species/108
Anura	Bufonidae		Rhinella		atacamensis		Rhinella atacamensis	Bufo atacamensis, Chaunus atacamensis, Bufo spinulosus atacamensis	Bufo atacamensis, Chaunus atacamensis, Bufo spinulosus atacamensis	Vulnerable (VU)	CL		111	https://amphibiaweb.org/species/111
Anura	Bufonidae		Rhinella		azarai			Bufo azarai			AR,BR,PY		7649	https://amphibiaweb.org/species/7649
Anura	Bufonidae		Rhinella		beebei	North Coastal Granular Toad, Beebe's Toad	Rhinella beebei			Least Concern (LC)	CO,TT,VE		8624	https://amphibiaweb.org/species/8624
Anura	Bufonidae		Rhinella		bergi		Rhinella bergi	Bufo bergi	Bufo bergi	Least Concern (LC)	AR,BR,PY		5999	https://amphibiaweb.org/species/5999
Anura	Bufonidae		Rhinella		bernardoi			Bufo bernardoi			AR		7467	https://amphibiaweb.org/species/7467
Anura	Bufonidae		Rhinella		casconi						BR		8294	https://amphibiaweb.org/species/8294
Anura	Bufonidae		Rhinella	margaritifera	castaneotica		Rhinella castaneotica	Bufo castaneoticus	Bufo castaneoticus	Least Concern (LC)	BO,BR,CO,PE		136	https://amphibiaweb.org/species/136
Anura	Bufonidae		Rhinella		centralis			Bufo centralis			PA		7524	https://amphibiaweb.org/species/7524
Anura	Bufonidae		Rhinella		ceratophrys		Rhinella ceratophrys	Bufo ceratophrys	Bufo ceratophrys	Least Concern (LC)	CO,EC,PE,VE		139	https://amphibiaweb.org/species/139
Anura	Bufonidae		Rhinella		cerradensis		Rhinella cerradensis			Data Deficient (DD)	BR		7000	https://amphibiaweb.org/species/7000
Anura	Bufonidae		Rhinella		chavin		Rhinella chavin	Bufo chavin	Bufo chavin	Critically Endangered (CR)	PE		5820	https://amphibiaweb.org/species/5820
Anura	Bufonidae		Rhinella		chrysophora		Rhinella chrysophora	Atelophryniscus chrysophorus	Atelophryniscus chrysophorus	Endangered (EN)	HN		30	https://amphibiaweb.org/species/30
Anura	Bufonidae		Rhinella		cristinae		Rhinella cristinae	Bufo cristinae	Bufo cristinae	Data Deficient (DD)	CO		6035	https://amphibiaweb.org/species/6035
Anura	Bufonidae		Rhinella		crucifer		Rhinella crucifer	Bufo crucifer	Bufo crucifer	Least Concern (LC)	PY,BR,AR		152	https://amphibiaweb.org/species/152
Anura	Bufonidae		Rhinella	margaritifera	dapsilis		Rhinella dapsilis	Bufo dapsilis	Bufo dapsilis	Least Concern (LC)	BR,CO,EC,PE		158	https://amphibiaweb.org/species/158
Anura	Bufonidae		Rhinella		diptycha	Cope's Toad, Schneider's Toad	Rhinella diptycha	Bufo diptychus	Bufo diptychus	Data Deficient (DD)	AR,BO,BR,PY,UY		162	https://amphibiaweb.org/species/162
Anura	Bufonidae		Rhinella		dorbignyi		Rhinella dorbignyi	Bufo dorbignyi, Bufo orbignyi, Chaunus dorbignyi	Bufo dorbignyi, Bufo orbignyi, Chaunus dorbignyi	Least Concern (LC)	UY,BR,AR		165	https://amphibiaweb.org/species/165
Anura	Bufonidae		Rhinella		fernandezae		Rhinella fernandezae	Bufo fernandezae, Chaunus fernandezae, Bufo granulosus fernandezae	Bufo fernandezae, Chaunus fernandezae, Bufo granulosus fernandezae	Least Concern (LC)	BR,UY,PY,AR		170	https://amphibiaweb.org/species/170
Anura	Bufonidae		Rhinella		festae	Valle Santiago Beaked Toad	Rhinella festae	Atelopus festae, Rhamphophryne festae	Atelopus festae, Rhamphophryne festae	Near Threatened (NT)	EC,PE		412	https://amphibiaweb.org/species/412
Anura	Bufonidae		Rhinella		fissipes		Rhinella fissipes	Bufo fissipes	Bufo fissipes	Least Concern (LC)	BO,PE		171	https://amphibiaweb.org/species/171
Anura	Bufonidae		Rhinella		gallardoi		Rhinella gallardoi	Bufo gallardoi	Bufo gallardoi	Endangered (EN)	AR		178	https://amphibiaweb.org/species/178
Anura	Bufonidae		Rhinella	margaritifera	gildae						BR		8363	https://amphibiaweb.org/species/8363
Anura	Bufonidae		Rhinella		gnustae		Rhinella gnustae	Bufo gnustae	Bufo gnustae	Data Deficient (DD)	AR		184	https://amphibiaweb.org/species/184
Anura	Bufonidae		Rhinella		granulosa		Rhinella granulosa	Bufo granulosus, Bufo manicorensis, Bufo globulosus	Bufo granulosus, Bufo manicorensis, Bufo globulosus	Least Concern (LC)	BR		187	https://amphibiaweb.org/species/187
Anura	Bufonidae		Rhinella		henseli		Rhinella henseli			Least Concern (LC)	BR		6831	https://amphibiaweb.org/species/6831
Anura	Bufonidae		Rhinella	margaritifera	hoogmoedi		Rhinella hoogmoedi			Least Concern (LC)	BR		6890	https://amphibiaweb.org/species/6890
Anura	Bufonidae		Rhinella		horribilis	Giant Toad					BZ,CO,CR,EC,SV,GT,HN,MX,NI,PA,PE,US,VE		8471	https://amphibiaweb.org/species/8471
Anura	Bufonidae		Rhinella		humboldti		Rhinella beebei	Bufo humboldti, Rhinella beebei, Chaunus beebei	Chaunus beebei, Rhinella beebei	Least Concern (LC)	CO		116	https://amphibiaweb.org/species/116
Anura	Bufonidae		Rhinella		icterica	Yellow Cururu Toad	Rhinella icterica	Bufo ictericus, Bufo missionum, Bufo bimaculatus	Bufo ictericus, Bufo missionum, Bufo bimaculatus	Least Concern (LC)	PY,BR		200	https://amphibiaweb.org/species/200
Anura	Bufonidae		Rhinella		inca		Rhinella inca	Bufo inca	Bufo inca	Least Concern (LC)	PE		201	https://amphibiaweb.org/species/201
Anura	Bufonidae		Rhinella		inopina						BR		7805	https://amphibiaweb.org/species/7805
Anura	Bufonidae		Rhinella		iserni		Rhinella iserni	Bufo iserni	Bufo iserni	Data Deficient (DD)	PE		203	https://amphibiaweb.org/species/203
Anura	Bufonidae		Rhinella		jimi		Rhinella jimi	Bufo jimi	Bufo jimi	Least Concern (LC)	BR		6024	https://amphibiaweb.org/species/6024
Anura	Bufonidae		Rhinella		justinianoi		Rhinella justinianoi	Bufo justinianoi	Bufo justinianoi	Vulnerable (VU)	BO		206	https://amphibiaweb.org/species/206
Anura	Bufonidae		Rhinella		leptoscelis						BO,PE		7303	https://amphibiaweb.org/species/7303
Anura	Bufonidae		Rhinella	margaritifera	lescurei		Rhinella lescurei			Data Deficient (DD)	GF,SR		7022	https://amphibiaweb.org/species/7022
Anura	Bufonidae		Rhinella		lilyrodriguezae	Lily Rodriguez's Beaked Toad; Sapo picudo de Lily Rodriguezi					PE		8623	https://amphibiaweb.org/species/8623
Anura	Bufonidae		Rhinella		limensis		Rhinella limensis	Bufo limensis	Bufo limensis	Least Concern (LC)	PE		221	https://amphibiaweb.org/species/221
Anura	Bufonidae		Rhinella		lindae		Rhinella lindae	Rhamphophryne lindae	Rhamphophryne lindae	Endangered (EN)	CO		413	https://amphibiaweb.org/species/413
Anura	Bufonidae		Rhinella		macrorhina		Rhinella macrorhina	Rhamphophryne macrorhina	Rhamphophryne macrorhina	Vulnerable (VU)	CO		414	https://amphibiaweb.org/species/414
Anura	Bufonidae		Rhinella	margaritifera	magnussoni		Rhinella magnussoni			Least Concern (LC)	BR		7020	https://amphibiaweb.org/species/7020
Anura	Bufonidae		Rhinella		major			Bufo major			AR,BO,BR,PY		7646	https://amphibiaweb.org/species/7646
Anura	Bufonidae		Rhinella		manu		Rhinella manu			Least Concern (LC)	PE		6917	https://amphibiaweb.org/species/6917
Anura	Bufonidae		Rhinella	margaritifera	margaritifera		Rhinella margaritifera	Bufo margaritifer, Rana margaritifera, Rana gemmata	Bufo margaritifer, Rana margaritifera, Rana gemmata	Least Concern (LC)	BR,CO,EC,PE		228	https://amphibiaweb.org/species/228
Anura	Bufonidae		Rhinella		marina	South American Cane Toad, Cane Toad, Marine Toad, Giant Toad	Rhinella marina	Bufo marinus, Rhinella marinus, Chaunus marina, Rana marina, Bufo brasiliensis	Bufo marinus, Rana marina, Bufo brasiliensis	Least Concern (LC)	AI,AG,AW,AU,BB,BO,BR,KY,CO,CR,DO,EC,FJ,GF,GD,GP,GU,GY,HT,JM,JP,MQ,MU,MS,MP,PG,PE,PH,PR,KN,LC,VC,SB,SR,TW,TT,US,VE,VI	TW,PH,PG,MU,JP,FJ,AU,VI,AG,AW,BB,DO,GD,GP,HT,JM,MQ,MS,MP,PR,KN,LC,SB,GU,VC	229	https://amphibiaweb.org/species/229
Anura	Bufonidae		Rhinella	margaritifera	martyi		Rhinella martyi			Least Concern (LC)	BR,GF,GY,SR		7021	https://amphibiaweb.org/species/7021
Anura	Bufonidae		Rhinella		merianae			Bufo merianae			BR,GY,SR,VE		7650	https://amphibiaweb.org/species/7650
Anura	Bufonidae		Rhinella		mirandaribeiroi			Bufo mirandaribeiroi			BO,BR		7647	https://amphibiaweb.org/species/7647
Anura	Bufonidae		Rhinella		multiverrucosa		Rhinella multiverrucosa			Data Deficient (DD)	PE		6662	https://amphibiaweb.org/species/6662
Anura	Bufonidae		Rhinella		nattereri			Bufo nattereri			BR,GY,VE		7648	https://amphibiaweb.org/species/7648
Anura	Bufonidae		Rhinella		nesiotes		Rhinella nesiotes	Bufo nesiotes	Bufo nesiotes	Endangered (EN)	PE		241	https://amphibiaweb.org/species/241
Anura	Bufonidae		Rhinella		nicefori		Rhinella nicefori	Rhamphophryne nicefori	Rhamphophryne nicefori	Endangered (EN)	CO		415	https://amphibiaweb.org/species/415
Anura	Bufonidae		Rhinella	margaritifera	ocellata		Rhinella ocellata	Bufo ocellatus	Bufo ocellatus	Least Concern (LC)	BR		243	https://amphibiaweb.org/species/243
Anura	Bufonidae		Rhinella		ornata		Rhinella ornata	Bufo ornatus		Least Concern (LC)	BR		6832	https://amphibiaweb.org/species/6832
Anura	Bufonidae		Rhinella		paraguas		Rhinella paraguas	Bufo paraguayensis		Least Concern (LC)	CO		8174	https://amphibiaweb.org/species/8174
Anura	Bufonidae		Rhinella	margaritifera	paraguayensis						BR		7410	https://amphibiaweb.org/species/7410
Anura	Bufonidae		Rhinella		poeppigii		Rhinella poeppigii	Bufo poeppigii, Bufo molitor, Phrynoidis molitor	Bufo poeppigii, Bufo molitor, Phrynoidis molitor	Least Concern (LC)	BO,CO,EC,PE		257	https://amphibiaweb.org/species/257
Anura	Bufonidae		Rhinella		pombali	sapo-cururu, sapo-amarelo	Rhinella pombali			Least Concern (LC)	BR		6616	https://amphibiaweb.org/species/6616
Anura	Bufonidae		Rhinella	margaritifera	proboscidea		Rhinella proboscidea			Least Concern (LC)	BR,CO,EC,PE		8007	https://amphibiaweb.org/species/8007
Anura	Bufonidae		Rhinella		pygmaea		Rhinella pygmaea	Bufo pygmaeus	Bufo pygmaeus	Least Concern (LC)	BR		261	https://amphibiaweb.org/species/261
Anura	Bufonidae		Rhinella		quechua		Rhinella quechua	Bufo quechua	Bufo quechua	Vulnerable (VU)	BO		263	https://amphibiaweb.org/species/263
Anura	Bufonidae		Rhinella	margaritifera	roqueana		Rhinella roqueana	Bufo roqueanus, Bufo typhonius roqueanus	Bufo roqueanus, Bufo typhonius roqueanus	Least Concern (LC)	CO,EC,PE		271	https://amphibiaweb.org/species/271
Anura	Bufonidae		Rhinella		rostrata	Mesopotamian Beaked Toad	Rhinella rostrata	Bufo rostratus, Rhamphophryne rostrata, Rhamphophryne rostratus	Bufo rostratus, Rhamphophryne rostrata, Rhamphophryne rostratus	Critically Endangered (CR)	CO		417	https://amphibiaweb.org/species/417
Anura	Bufonidae		Rhinella		rubescens		Rhinella rubescens	Bufo rufus, Bufo rubescens, Chaunus rubescens	Bufo rufus, Bufo rubescens, Chaunus rubescens	Least Concern (LC)	BR		273	https://amphibiaweb.org/species/273
Anura	Bufonidae		Rhinella		rubropunctata		Rhinella rubropunctata	Bufo rubropunctatus, Phryne rubropunctata, Chaunus rubropunctatus	Bufo rubropunctatus, Phryne rubropunctata, Chaunus rubropunctatus	Vulnerable (VU)	CL,AR		272	https://amphibiaweb.org/species/272
Anura	Bufonidae		Rhinella		ruizi		Rhinella ruizi	Rhamphophryne ruizi	Rhamphophryne ruizi	Vulnerable (VU)	CO		6052	https://amphibiaweb.org/species/6052
Anura	Bufonidae		Rhinella		rumbolli		Rhinella rumbolli	Bufo rumbolli	Bufo rumbolli	Vulnerable (VU)	AR		274	https://amphibiaweb.org/species/274
Anura	Bufonidae		Rhinella		schneideri	Cururu Toad, Rococo Toad	Rhinella schneideri	Bufo paracnemis, Bufo schneideri, Chaunus schneideri	Bufo paracnemis, Bufo schneideri, Chaunus schneideri	Least Concern (LC)	AR,BO,BR,PY,UY		275	https://amphibiaweb.org/species/275
Anura	Bufonidae		Rhinella	margaritifera	scitula		Rhinella scitula	Bufo scitulus	Bufo scitulus	Data Deficient (DD)	BR,PY		6298	https://amphibiaweb.org/species/6298
Anura	Bufonidae		Rhinella	margaritifera	sclerocephala		Rhinella sclerocephala	Bufo sclerocephalus	Bufo sclerocephalus	Endangered (EN)	VE		5925	https://amphibiaweb.org/species/5925
Anura	Bufonidae		Rhinella	margaritifera	sebbeni						BR		8362	https://amphibiaweb.org/species/8362
Anura	Bufonidae		Rhinella		spinulosa		Rhinella spinulosa	Bufo nigricans, Bufo spinulosus, Bufo simus	Bufo nigricans, Bufo spinulosus, Bufo simus	Least Concern (LC)	EC,PE,BO,CL,AR		280	https://amphibiaweb.org/species/280
Anura	Bufonidae		Rhinella	margaritifera	stanlaii		Rhinella stanlaii	Bufo stanlaii	Bufo stanlaii	Least Concern (LC)	BO		6049	https://amphibiaweb.org/species/6049
Anura	Bufonidae		Rhinella		sternosignata		Rhinella sternosignata	Bufo sternosignatus	Bufo sternosignatus	Near Threatened (NT)	CO,VE		283	https://amphibiaweb.org/species/283
Anura	Bufonidae		Rhinella		tacana		Rhinella tacana			Data Deficient (DD)	BO,PE		6795	https://amphibiaweb.org/species/6795
Anura	Bufonidae		Rhinella		tenrec		Rhinella tenrec	Rhamphophryne tenrec	Rhamphophryne tenrec	Endangered (EN)	CO		418	https://amphibiaweb.org/species/418
Anura	Bufonidae		Rhinella		truebae		Rhinella truebae	Rhamphophryne truebae	Rhamphophryne truebae	Data Deficient (DD)	CO		419	https://amphibiaweb.org/species/419
Anura	Bufonidae		Rhinella		vellardi		Rhinella vellardi	Bufo vellardi	Bufo vellardi	Data Deficient (DD)	PE		307	https://amphibiaweb.org/species/307
Anura	Bufonidae		Rhinella		veraguensis		Rhinella veraguensis	Bufo veraguensis	Bufo veraguensis	Least Concern (LC)	PE,BO		308	https://amphibiaweb.org/species/308
Anura	Bufonidae		Rhinella		veredas		Rhinella veredas			Least Concern (LC)	BR		6927	https://amphibiaweb.org/species/6927
Anura	Bufonidae		Rhinella		yanachaga		Rhinella yanachaga			Vulnerable (VU)	PE		7019	https://amphibiaweb.org/species/7019
Anura	Bufonidae		Rhinella	margaritifera	yunga						PE		8126	https://amphibiaweb.org/species/8126
Anura	Bufonidae		Sabahphrynus		maculatus			Ansonia anotis, Pedostibes maculatus, Nectophryne maculata	Ansonia anotis, Pedostibes maculatus, Nectophryne maculata		MY		387	https://amphibiaweb.org/species/387
Anura	Bufonidae		Schismaderma		carens	Red Toad	Schismaderma carens			Least Concern (LC)	AO,BW,CD,KE,MW,MZ,NA,ZA,SZ,TZ,ZM,ZW		421	https://amphibiaweb.org/species/421
Anura	Bufonidae		Sclerophrys		arabica		Sclerophrys arabica	Amietophrynus arabica		Least Concern (LC)	OM,SA,AE,YE		104	https://amphibiaweb.org/species/104
Anura	Bufonidae		Sclerophrys		asmarae		Sclerophrys asmarae	Bufo asmarae, Amietophrynus asmarae	Bufo asmarae	Least Concern (LC)	ER,ET		109	https://amphibiaweb.org/species/109
Anura	Bufonidae		Sclerophrys		blanfordii		Sclerophrys blanfordii	Bufo blanfordii, Amietophrynus blanfordii	Bufo blanfordii	Least Concern (LC)	DJ,SO,ET		119	https://amphibiaweb.org/species/119
Anura	Bufonidae		Sclerophrys		brauni		Sclerophrys brauni	Bufo brauni, Amietophrynus brauni	Bufo brauni	Least Concern (LC)	TZ		123	https://amphibiaweb.org/species/123
Anura	Bufonidae		Sclerophrys		buchneri		Sclerophrys buchneri	Bufo buchneri	Bufo buchneri	Data Deficient (DD)	AO		126	https://amphibiaweb.org/species/126
Anura	Bufonidae		Sclerophrys		camerunensis		Sclerophrys camerunensis	Bufo camerunensis, Amietophrynus camerunensis	Bufo camerunensis	Least Concern (LC)	CM,CF,CG,CD,GQ,GA,NG		133	https://amphibiaweb.org/species/133
Anura	Bufonidae		Sclerophrys		capensis	Ranger's Toad	Sclerophrys capensis	Bufo rangeri, Bufo regularis rangeri, Amietophrynus rangeri	Bufo rangeri, Bufo regularis rangeri	Least Concern (LC)	LS,ZA,SZ		266	https://amphibiaweb.org/species/266
Anura	Bufonidae		Sclerophrys		channingi		Sclerophrys channingi	Amietophrynus channingi		Least Concern (LC)	CD		7630	https://amphibiaweb.org/species/7630
Anura	Bufonidae		Sclerophrys		chudeaui	Bata Marsh Toad	Sclerophrys chudeaui	Bufo chudeaui, Amietophrynus chudeaui	Bufo chudeaui	Data Deficient (DD)	SN		142	https://amphibiaweb.org/species/142
Anura	Bufonidae		Sclerophrys		cristiglans		Sclerophrys cristiglans	Bufo cristiglans	Bufo cristiglans	Data Deficient (DD)	SL		151	https://amphibiaweb.org/species/151
Anura	Bufonidae		Sclerophrys		danielae		Sclerophrys danielae	Bufo danielae	Bufo danielae	Data Deficient (DD)	CI		157	https://amphibiaweb.org/species/157
Anura	Bufonidae		Sclerophrys		djohongensis		Sclerophrys djohongensis	Bufo djohongensis, Bufo funereus djohongensis	Bufo djohongensis, Bufo funereus djohongensis	Endangered (EN)	CM		161	https://amphibiaweb.org/species/161
Anura	Bufonidae		Sclerophrys		dodsoni	Dodson's Toad, dufda 'a 'ilba	Sclerophrys dodsoni	Amietophrynus dodsoni		Least Concern (LC)	DJ,ET,SO,SD,EG		163	https://amphibiaweb.org/species/163
Anura	Bufonidae		Sclerophrys		fuliginata		Sclerophrys fuliginata	Bufo fuliginatus	Bufo fuliginatus	Least Concern (LC)	CD,TZ,ZM		174	https://amphibiaweb.org/species/174
Anura	Bufonidae		Sclerophrys		funerea		Sclerophrys funerea	Bufo funereus	Bufo funereus	Least Concern (LC)	AO,BI,CG,CD,GA,RW,UG		175	https://amphibiaweb.org/species/175
Anura	Bufonidae		Sclerophrys		garmani	Garman's Toad	Sclerophrys garmani	Bufo garmani	Bufo garmani	Least Concern (LC)	AO,BW,ET,KE,MZ,NA,SO,ZA,SZ,TZ,ZM,ZW		181	https://amphibiaweb.org/species/181
Anura	Bufonidae		Sclerophrys		gracilipes		Sclerophrys gracilipes	Bufo gracilipes, Amietophrynus gracilipes	Bufo gracilipes	Least Concern (LC)	CM,CD,GQ,GA,NG		185	https://amphibiaweb.org/species/185
Anura	Bufonidae		Sclerophrys		gutturalis	Guttural Toad	Sclerophrys gutturalis	Bufo gutturalis	Bufo gutturalis	Least Concern (LC)	AO,BW,CD,KE,LS,MW,MU,MZ,NA,,SO,ZA,SZ,TZ,UG,ZM,ZW	MU	189	https://amphibiaweb.org/species/189
Anura	Bufonidae		Sclerophrys		kassasii	Nile Valley Toad, dufdu'at al-qasas	Sclerophrys kassasii	Bufo kassasii	Bufo kassasii	Least Concern (LC)	EG		208	https://amphibiaweb.org/species/208
Anura	Bufonidae		Sclerophrys		kerinyagae		Sclerophrys kerinyagae	Bufo kerinyagae	Bufo kerinyagae	Least Concern (LC)	TZ,UG,KE,ET		213	https://amphibiaweb.org/species/213
Anura	Bufonidae		Sclerophrys		kisoloensis	Kisolo Toad	Sclerophrys kisoloensis	Bufo kisoloensis, Bufo regularis kisoloensis, Bufo regularis marakwetensis	Bufo kisoloensis, Bufo regularis kisoloensis, Bufo regularis marakwetensis	Least Concern (LC)	CD,KE,MW,RW,TZ,UG,ZM		214	https://amphibiaweb.org/species/214
Anura	Bufonidae		Sclerophrys		langanoensis		Sclerophrys langanoensis	Bufo langanoensis	Bufo langanoensis	Data Deficient (DD)	ET		217	https://amphibiaweb.org/species/217
Anura	Bufonidae		Sclerophrys		latifrons		Sclerophrys latifrons	Bufo latifrons	Bufo latifrons	Least Concern (LC)	AO,CM,CG,CD,GQ,GA		219	https://amphibiaweb.org/species/219
Anura	Bufonidae		Sclerophrys		lemairii	Lemaire's Toad	Sclerophrys lemairii	Bufo lemairii	Bufo lemairii	Least Concern (LC)	AO,BW,CG,CD,ZM		220	https://amphibiaweb.org/species/220
Anura	Bufonidae		Sclerophrys		maculata	Flat-backed Toad	Sclerophrys maculata	Bufo maculatus	Bufo maculatus	Least Concern (LC)	BJ,CM,CI,GH,MZ,NG,SN,SL		227	https://amphibiaweb.org/species/227
Anura	Bufonidae		Sclerophrys		mauritanica	Mauritanian Toad	Sclerophrys mauritanica	Bufo mauritanicus		Least Concern (LC)	DZ,MA,TN		231	https://amphibiaweb.org/species/231
Anura	Bufonidae		Sclerophrys		pantherina	Western Leopard Toad	Sclerophrys pantherina	Bufo pantherinus, Bufo cruciger, Amietophrynus pantherinus	Bufo pantherinus, Bufo cruciger	Endangered (EN)	ZA		246	https://amphibiaweb.org/species/246
Anura	Bufonidae		Sclerophrys		pardalis	Leopard Toad	Sclerophrys pardalis	Bufo pardalis, Bufo regularis pardalis, Amietophrynus pardalis	Bufo pardalis, Bufo regularis pardalis	Least Concern (LC)	ZA		248	https://amphibiaweb.org/species/248
Anura	Bufonidae		Sclerophrys		pentoni	Penton's toad	Sclerophrys pentoni	Amietophrynus pentoni, Bufo pentoni		Least Concern (LC)	BJ,BF,CM,DJ,ER,GM,GH,GN,ML,MR,NE,NG,SN,SS,SD		252	https://amphibiaweb.org/species/252
Anura	Bufonidae		Sclerophrys		perreti		Sclerophrys perreti	Bufo perreti	Bufo perreti	Critically Endangered (CR)	NG		256	https://amphibiaweb.org/species/256
Anura	Bufonidae		Sclerophrys		poweri	Power's Toad	Sclerophrys poweri	Bufo poweri, Bufo regularis poweri	Bufo poweri, Bufo regularis poweri	Least Concern (LC)	AO,BW,MZ,NA,ZA		258	https://amphibiaweb.org/species/258
Anura	Bufonidae		Sclerophrys		pusilla		Sclerophrys pusilla	Amietophrynus pusilla		Least Concern (LC)	AO,CF,TD,CD,GQ,ET,GA,KE,LS,MW,MZ,RW,ZA,SS,SZ,TZ,UG,ZM,ZW		8467	https://amphibiaweb.org/species/8467
Anura	Bufonidae		Sclerophrys		reesi		Sclerophrys reesi	Bufo reesi	Bufo reesi	Data Deficient (DD)	TZ		267	https://amphibiaweb.org/species/267
Anura	Bufonidae		Sclerophrys		regularis	Common African toad	Sclerophrys regularis	Amietophrynus regularis, Bufo regularis	Bufo regularis	Least Concern (LC)	AO,BJ,BF,CM,CF,TD,CG,CD,EG,GQ,ER,ET,GA,GM,GH,GN,GW,KE,LR,MW,ML,MR,NE,NG,RE,RW,SN,SL,SD,TZ,TG,UG	,RE	268	https://amphibiaweb.org/species/268
Anura	Bufonidae		Sclerophrys		steindachneri		Sclerophrys steindachneri	Amietophrynus steindachneri, Bufo steindachneri	Bufo steindachneri	Least Concern (LC)	CM,ET,KE,NG,SO,SS,TZ,UG		281	https://amphibiaweb.org/species/281
Anura	Bufonidae		Sclerophrys		superciliaris		Sclerophrys superciliaris	Amietophrynus superciliaris, Bufo superciliaris	Bufo superciliaris	Least Concern (LC)	BJ,CM,CF,CG,CD,CI,GQ,GA,GH,LR,NG,TG		287	https://amphibiaweb.org/species/287
Anura	Bufonidae		Sclerophrys		taiensis		Sclerophrys taiensis	Bufo amieti, Bufo taiensis	Bufo amieti, Bufo taiensis	Endangered (EN)	CI		5983	https://amphibiaweb.org/species/5983
Anura	Bufonidae		Sclerophrys		tihamica		Sclerophrys tihamica	Amietophrynus tihamica		Least Concern (LC)	YE,SA		294	https://amphibiaweb.org/species/294
Anura	Bufonidae		Sclerophrys		togoensis		Sclerophrys togoensis	Bufo togoensis	Bufo togoensis	Near Threatened (NT)	CI,GH,GN,LR,SL,TG		295	https://amphibiaweb.org/species/295
Anura	Bufonidae		Sclerophrys		tuberosa		Sclerophrys tuberosa	Bufo tuberosus	Bufo tuberosus	Least Concern (LC)	CM,CF,CG,CD,GQ,GA		299	https://amphibiaweb.org/species/299
Anura	Bufonidae		Sclerophrys		turkanae		Sclerophrys turkanae	Bufo turkanae	Bufo turkanae	Data Deficient (DD)	KE		300	https://amphibiaweb.org/species/300
Anura	Bufonidae		Sclerophrys		urunguensis		Sclerophrys urunguensis	Bufo urunguensis	Bufo urunguensis	Vulnerable (VU)	TZ,ZM		301	https://amphibiaweb.org/species/301
Anura	Bufonidae		Sclerophrys		villiersi		Sclerophrys villiersi	Bufo villiersi	Bufo villiersi	Endangered (EN)	CM		311	https://amphibiaweb.org/species/311
Anura	Bufonidae		Sclerophrys		vittata		Sclerophrys vittata	Bufo vittatus	Bufo vittatus	Data Deficient (DD)	TZ,KE,UG		313	https://amphibiaweb.org/species/313
Anura	Bufonidae		Sclerophrys		xeros		Sclerophrys xeros	Amietophrynus xeros, Bufo xeros	Bufo xeros	Least Concern (LC)	DZ,BF,CM,TD,DJ,ER,ET,GN,KE,LY,ML,MR,NE,NG,SN,SL,SO,SD,TZ,UG,EH		315	https://amphibiaweb.org/species/315
Anura	Bufonidae		Sigalegalephrynus		burnitelongensis	Burning Mountain Puppet Toad, Kodok-wayang burnitelong (Indonesian)				Endangered (EN) - Provisional	ID		9093	https://amphibiaweb.org/species/9093
Anura	Bufonidae		Sigalegalephrynus		gayoluesensis	Gayo Lues HighlandÃ¢â‚¬â„¢s Puppet Toad; Indonesia name: Kodok-wayang gayolues				Endangered (EN) - Provisional	ID		9094	https://amphibiaweb.org/species/9094
Anura	Bufonidae		Sigalegalephrynus		harveyi	HarveyÃ¢â‚¬â„¢s Puppet Toad, in English; Kodok-wayang Harvey, in Indonesian				Endangered (EN) - Provisional	ID		9095	https://amphibiaweb.org/species/9095
Anura	Bufonidae		Sigalegalephrynus		mandailinguensis	Mandailing Puppet Toads				Endangered (EN) - Provisional	ID		8597	https://amphibiaweb.org/species/8597
Anura	Bufonidae		Sigalegalephrynus		minangkabauensis	Minangkaban Puppet Toads				Endangered (EN) - Provisional	ID		8598	https://amphibiaweb.org/species/8598
Anura	Bufonidae		Strauchbufo		raddei	Mongolian Toad	Strauchbufo raddei	Bufo raddei, Bufo koslovi, Bufo brevipes	Bufo raddei, Bufo koslovi, Bufo brevipes	Least Concern (LC)	CN,KP,MN,RU		265	https://amphibiaweb.org/species/265
Anura	Bufonidae		Truebella		skoptes		Truebella skoptes			Data Deficient (DD)	PE		428	https://amphibiaweb.org/species/428
Anura	Bufonidae		Truebella		tothastes		Truebella tothastes			Data Deficient (DD)	PE		429	https://amphibiaweb.org/species/429
Anura	Bufonidae		Vandijkophrynus		amatolicus	Amatola Toad	Vandijkophrynus amatolicus	Bufo amatolicus, Bufo angusticeps amatolica	Bufo amatolicus, Bufo angusticeps amatolica	Critically Endangered (CR)	ZA		98	https://amphibiaweb.org/species/98
Anura	Bufonidae		Vandijkophrynus		angusticeps	Sand Toad	Vandijkophrynus angusticeps	Bufo angusticeps	Bufo angusticeps	Least Concern (LC)	ZA		103	https://amphibiaweb.org/species/103
Anura	Bufonidae		Vandijkophrynus		gariepensis	Karoo Toad	Vandijkophrynus gariepensis	Bufo gariepensis	Bufo gariepensis	Least Concern (LC)	LS,ZW		180	https://amphibiaweb.org/species/180
Anura	Bufonidae		Vandijkophrynus		inyangae	Inyanga Toad	Vandijkophrynus inyangae	Bufo inyangae, Bufo gariepensis inyangae	Bufo inyangae, Bufo gariepensis inyangae	Vulnerable (VU)	MZ,ZW		5966	https://amphibiaweb.org/species/5966
Anura	Bufonidae		Vandijkophrynus		robinsoni	Paradise Toad	Vandijkophrynus robinsoni	Bufo robinsoni	Bufo robinsoni	Least Concern (LC)	ZA		270	https://amphibiaweb.org/species/270
Anura	Bufonidae		Werneria		bambutensis	Bamboutos Smalltongue Toad	Werneria bambutensis			Endangered (EN)	CM		431	https://amphibiaweb.org/species/431
Anura	Bufonidae		Werneria		iboundji		Werneria iboundji			Critically Endangered (CR)	GA		6352	https://amphibiaweb.org/species/6352
Anura	Bufonidae		Werneria		mertensiana		Werneria mertensiana			Endangered (EN)	CM		432	https://amphibiaweb.org/species/432
Anura	Bufonidae		Werneria		preussi	Buca Small-tongue Toad	Werneria preussi	Werneria fulva, Bufo preussi, Atelopus africanus	Werneria fulva, Bufo preussi, Atelopus africanus	Endangered (EN)	TG,CM		433	https://amphibiaweb.org/species/433
Anura	Bufonidae		Werneria		submontana		Werneria submontana			Endangered (EN)	CM		6351	https://amphibiaweb.org/species/6351
Anura	Bufonidae		Werneria		tandyi		Werneria tandyi			Endangered (EN)	CM		434	https://amphibiaweb.org/species/434
Anura	Bufonidae		Wolterstorffina		chirioi		Wolterstorffina chirioi			Critically Endangered (CR)	CM		5824	https://amphibiaweb.org/species/5824
Anura	Bufonidae		Wolterstorffina		mirei		Wolterstorffina mirei			Endangered (EN)	CM		436	https://amphibiaweb.org/species/436
Anura	Bufonidae		Wolterstorffina		parvipalmata		Wolterstorffina parvipalmata			Vulnerable (VU)	CM,GQ,NG		437	https://amphibiaweb.org/species/437
Anura	Bufonidae		Xanthophryne		koynayensis		Xanthophryne koynayensis			Endangered (EN)	IN		216	https://amphibiaweb.org/species/216
Anura	Bufonidae		Xanthophryne		tigerina		Xanthophryne tigerina			Critically Endangered (CR)	IN		7408	https://amphibiaweb.org/species/7408
Anura	Calyptocephalellidae		Calyptocephalella		gayi	Helmeted Water Toad, Chilean Giant Frog	Calyptocephalella gayi	Calyptocephalus gayi, Caudiverbera caudiverbera		Vulnerable (VU)	CL		2585	https://amphibiaweb.org/species/2585
Anura	Calyptocephalellidae		Telmatobufo		australis	Pelado Mountains False Toad	Telmatobufo australis			Least Concern (LC)	CL		2729	https://amphibiaweb.org/species/2729
Anura	Calyptocephalellidae		Telmatobufo		bullocki	BullockÃ¢â‚¬â„¢s False Toad	Telmatobufo bullocki			Endangered (EN)	CL		2730	https://amphibiaweb.org/species/2730
Anura	Calyptocephalellidae		Telmatobufo		ignotus		Telmatobufo ignotus			Endangered (EN)	CL		8550	https://amphibiaweb.org/species/8550
Anura	Calyptocephalellidae		Telmatobufo		venustus	Chile Mountains False Toad	Telmatobufo venustus			Endangered (EN)	CL		2731	https://amphibiaweb.org/species/2731
Anura	Centrolenidae	Centroleninae	Centrolene		acanthidiocephalum		Centrolene acanthidiocephalum			Data Deficient (DD)	CO		1711	https://amphibiaweb.org/species/1711
Anura	Centrolenidae	Centroleninae	Centrolene		altitudinalis		Centrolene altitudinale			Data Deficient (DD)	VE		1712	https://amphibiaweb.org/species/1712
Anura	Centrolenidae	Centroleninae	Centrolene		antioquiense		Centrolene antioquiense			Near Threatened (NT)	CO		1713	https://amphibiaweb.org/species/1713
Anura	Centrolenidae	Centroleninae	Centrolene		azulae		Centrolene azulae			Endangered (EN)	PE		1715	https://amphibiaweb.org/species/1715	This name is of uncertain taxonomic status.
Anura	Centrolenidae	Centroleninae	Centrolene		ballux	Burrowes' Giant Glass Frog, Golden-flecked Glass Frog,Gold-dust Glassfrog, Rana de Cristal Polvo de Oro	Centrolene ballux			Critically Endangered (CR)	CO,EC		1717	https://amphibiaweb.org/species/1717
Anura	Centrolenidae	Centroleninae	Centrolene		buckleyi	BuckleyÃ¢â‚¬â„¢s Glassfrog, Rana de Cristal de Buckley.	Centrolene buckleyi			Vulnerable (VU)	CO,EC,PE		1718	https://amphibiaweb.org/species/1718
Anura	Centrolenidae	Centroleninae	Centrolene		charapita	Charapita Glassfrog, Rana de Cristal Charapita.					EC,PE		8212	https://amphibiaweb.org/species/8212
Anura	Centrolenidae	Centroleninae	Centrolene		condor	Condor Glassfrog, Rana de Cristal del CÃƒÂ³ndor	Centrolene condor			Data Deficient (DD)	EC		7154	https://amphibiaweb.org/species/7154
Anura	Centrolenidae	Centroleninae	Centrolene		daidalea		Centrolene daidaleum			Vulnerable (VU)	CO,VE		1763	https://amphibiaweb.org/species/1763
Anura	Centrolenidae	Centroleninae	Centrolene		geckoideum	Gecko Glassfrog, Rana de Cristal Geco	Centrolene geckoideum			Vulnerable (VU)	EC,CO		1720	https://amphibiaweb.org/species/1720
Anura	Centrolenidae	Centroleninae	Centrolene		heloderma	Bumpy Glassfrog, Pichincha Giant Glass Frog, Warty Glassfrog, Rana de Cristal Verrugosa	Centrolene heloderma			Critically Endangered (CR)	CO,EC		1725	https://amphibiaweb.org/species/1725
Anura	Centrolenidae	Centroleninae	Centrolene		hesperium		Centrolene hesperium			Vulnerable (VU)	PE		1726	https://amphibiaweb.org/species/1726
Anura	Centrolenidae	Centroleninae	Centrolene		huilense	Huila Glassfrog, Rana de Cristal de Huila	Centrolene huilense			Data Deficient (DD)	CO,EC		1727	https://amphibiaweb.org/species/1727
Anura	Centrolenidae	Centroleninae	Centrolene		hybrida		Centrolene hybrida			Least Concern (LC)	CO		1728	https://amphibiaweb.org/species/1728
Anura	Centrolenidae	Centroleninae	Centrolene		lemniscatum		Centrolene lemniscatum			Data Deficient (DD)	PE		1730	https://amphibiaweb.org/species/1730
Anura	Centrolenidae	Centroleninae	Centrolene		lynchi	LynchÃ¢â‚¬â„¢s Glassfrog, Rana de Cristal de Lynch	Centrolene lynchi	Centrolene gemmatum, Centrolene scirtetes		Endangered (EN)	CO,EC		1732	https://amphibiaweb.org/species/1732
Anura	Centrolenidae	Centroleninae	Centrolene		medemi	MedemÃ¢â‚¬â„¢s Glassfrog, Rana de Cristal de Medem.	Centrolene medemi			Data Deficient (DD)	EC,CO		1734	https://amphibiaweb.org/species/1734	A valid species but generic allocation uncertain. Guayasamin JM, Castroviejo- Fisher S, Trueb L, AyarzagÃƒÂ¼ena J, Rada M, VilÃƒ C. 2009. Phylogenetic systematics of Glassfrogs (Amphibia: Centrolenidae) and their sister taxon Allophryne ruthveni. Zootaxa 2100:1Ã¢â‚¬â€œ97.
Anura	Centrolenidae	Centroleninae	Centrolene		muelleri		Centrolene muelleri			Data Deficient (DD)	PE		1735	https://amphibiaweb.org/species/1735
Anura	Centrolenidae	Centroleninae	Centrolene		notosticta						CO,VE		9244	https://amphibiaweb.org/species/9244
Anura	Centrolenidae	Centroleninae	Centrolene		notostictum		Centrolene notostictum			Least Concern (LC)	CO		1736	https://amphibiaweb.org/species/1736
Anura	Centrolenidae	Centroleninae	Centrolene		paezorum		Centrolene paezorum			Data Deficient (DD)	CO		1737	https://amphibiaweb.org/species/1737
Anura	Centrolenidae	Centroleninae	Centrolene		peristicta	Dappled Glassfrog, Rana de Cristal Punteada.	Centrolene peristictum	Centrolene peristictum		Vulnerable (VU)	CO,EC		1738	https://amphibiaweb.org/species/1738
Anura	Centrolenidae	Centroleninae	Centrolene		petrophilum		Centrolene petrophilum			Endangered (EN)	CO		1739	https://amphibiaweb.org/species/1739
Anura	Centrolenidae	Centroleninae	Centrolene		pipilatum	Peeping Glassfrog, Rana de Cristal Piadora	Centrolene pipilatum			Endangered (EN)	EC		1740	https://amphibiaweb.org/species/1740
Anura	Centrolenidae	Centroleninae	Centrolene		quindianum		Centrolene quindianum			Vulnerable (VU)	CO		1743	https://amphibiaweb.org/species/1743
Anura	Centrolenidae	Centroleninae	Centrolene		robledoi		Centrolene robledoi			Least Concern (LC)	CO		1744	https://amphibiaweb.org/species/1744
Anura	Centrolenidae	Centroleninae	Centrolene		sabini	Sabin's Glassfrog, Rana de cristal de Sabin	Centrolene sabini			Vulnerable (VU)	PE		7868	https://amphibiaweb.org/species/7868
Anura	Centrolenidae	Centroleninae	Centrolene		sanchezi	SÃƒÂ¡nchezÃ¢â‚¬â„¢s Glassfrog, Rana de cristal de SÃƒÂ¡nchez.	Centrolene sanchezi	Centrolene guanacarum, Centrolene bacatum		Data Deficient (DD)	CO		1745	https://amphibiaweb.org/species/1745
Anura	Centrolenidae	Centroleninae	Centrolene		savagei	Savage's Glass Frog	Centrolene savagei			Least Concern (LC)	CO		1794	https://amphibiaweb.org/species/1794
Anura	Centrolenidae	Centroleninae	Centrolene		solitaria		Centrolene solitaria			Data Deficient (DD)	CO		1797	https://amphibiaweb.org/species/1797
Anura	Centrolenidae	Centroleninae	Centrolene		venezuelense		Centrolene venezuelense			Least Concern (LC)	VE		6834	https://amphibiaweb.org/species/6834
Anura	Centrolenidae	Centroleninae	Chimerella		corleone						PE		8213	https://amphibiaweb.org/species/8213
Anura	Centrolenidae	Centroleninae	Chimerella		mariaelenae	Maria Elena's Glassfrog, Rana de Cristal de MarÃƒÂ­a Elena	Chimerella mariaelenae			Least Concern (LC)	EC,PE		6755	https://amphibiaweb.org/species/6755
Anura	Centrolenidae	Centroleninae	Cochranella		duidaeana		Cochranella duidaeana			Data Deficient (DD)	VE		1764	https://amphibiaweb.org/species/1764
Anura	Centrolenidae	Centroleninae	Cochranella		erminea		Cochranella erminea			Data Deficient (DD)	PE		6983	https://amphibiaweb.org/species/6983
Anura	Centrolenidae	Centroleninae	Cochranella		euhystrix		Cochranella euhystrix			Data Deficient (DD)	PE		1765	https://amphibiaweb.org/species/1765
Anura	Centrolenidae	Centroleninae	Cochranella		euknemos	Fringe-Limbed Tree Frog, Ranita de Cristal	Cochranella euknemos			Least Concern (LC)	CO,PA,CR		1766	https://amphibiaweb.org/species/1766
Anura	Centrolenidae	Centroleninae	Cochranella		geijskesi		Cochranella geijskesi			Data Deficient (DD)	SR		1769	https://amphibiaweb.org/species/1769
Anura	Centrolenidae	Centroleninae	Cochranella		granulosa	Granular Glassfrog, Rana de Cristal Granulosa	Cochranella granulosa			Least Concern (LC)	CR,HN,NI,PA		1770	https://amphibiaweb.org/species/1770
Anura	Centrolenidae	Centroleninae	Cochranella		guayasamini						PE		8214	https://amphibiaweb.org/species/8214
Anura	Centrolenidae	Centroleninae	Cochranella		litoralis	Litoral Glassfrog, Rana de Cristal del Litoral.	Cochranella litoralis			Data Deficient (DD)	CO,EC		5583	https://amphibiaweb.org/species/5583
Anura	Centrolenidae	Centroleninae	Cochranella		mache	Ecuadorian Blue Glass Frog, Mache Glassfrog, Rana de Cristal de Mache	Cochranella mache			Endangered (EN)	CO,EC		6353	https://amphibiaweb.org/species/6353
Anura	Centrolenidae	Centroleninae	Cochranella		megista		Cochranella megistra	Cochranella megistra	Cochranella megistra	Endangered (EN)	CO		1776	https://amphibiaweb.org/species/1776
Anura	Centrolenidae	Centroleninae	Cochranella		nola		Cochranella nola			Near Threatened (NT)	BO,PE		5561	https://amphibiaweb.org/species/5561
Anura	Centrolenidae	Centroleninae	Cochranella		ocellifera		Centrolene ocellifera	Centrolene ocellifera, Centrolenella prosoblepon, Hyla prosoblepon, Centrolene prosoblepon	Centrolenella prosoblepon, Hyla prosoblepon, Centrolene prosoblepon	Data Deficient (DD)	EC		1780	https://amphibiaweb.org/species/1780
Anura	Centrolenidae	Centroleninae	Cochranella		ramirezi		Cochranella ramirezi			Data Deficient (DD)	CO		1789	https://amphibiaweb.org/species/1789
Anura	Centrolenidae	Centroleninae	Cochranella		resplendens	Resplendent Glassfrog, Rana de Cristal Resplandeciente.	Cochranella resplendens	Cochranella phryxa		Least Concern (LC)	BO,BR,CO,EC,PE		1790	https://amphibiaweb.org/species/1790
Anura	Centrolenidae	Centroleninae	Cochranella		riveroi		Cochranella riveroi			Vulnerable (VU)	VE		1792	https://amphibiaweb.org/species/1792
Anura	Centrolenidae	Centroleninae	Cochranella		xanthocheridia		Cochranella xanthocheridia			Vulnerable (VU)	CO		1803	https://amphibiaweb.org/species/1803
Anura	Centrolenidae	Centroleninae	Espadarana		andina	Andes Giant Glass Frog	Espadarana andina			Least Concern (LC)	CO,VE		1731	https://amphibiaweb.org/species/1731
Anura	Centrolenidae	Centroleninae	Espadarana		audax	Napo Giant Glass Frog, Daring Glassfrog, Rana de Cristal Audaz	Espadarana audax	Centrolene fernandoi		Endangered (EN)	CO,EC,PE		1714	https://amphibiaweb.org/species/1714
Anura	Centrolenidae	Centroleninae	Espadarana		callistomma	Beautiful eyes Glassfrog, Rana de cristal de ojos bellos	Espadarana callistomma			Data Deficient (DD)	EC		6907	https://amphibiaweb.org/species/6907
Anura	Centrolenidae	Centroleninae	Espadarana		durrellorum	DurrellÃ¢â‚¬â„¢s Glassfrog, Rana de Cristal de Durrell	Espadarana durrellorum			Vulnerable (VU)	EC		6971	https://amphibiaweb.org/species/6971
Anura	Centrolenidae	Centroleninae	Espadarana		prosoblepon	Emerald Glass Frog, Nicaragua Giant Glassfrog, Variable Glassfrog, Rana de Cristal Variable	Espadarana prosoblepon			Least Concern (LC)	CO,CR,EC,HN,NI,PA		1741	https://amphibiaweb.org/species/1741
Anura	Centrolenidae	Centroleninae	Ikakogi		ispacue						CO		9001	https://amphibiaweb.org/species/9001
Anura	Centrolenidae	Centroleninae	Ikakogi		tayrona	Magdalena Giant Glass Frog	Ikakogi tayrona			Vulnerable (VU)	CO		1747	https://amphibiaweb.org/species/1747
Anura	Centrolenidae	Centroleninae	Nymphargus		anomalus	Napo Cochran Frog, Anomalous Glassfrog, Rana de Cristal AnÃƒÂ³mala	Nymphargus anomalus	Cochranella anomala	Cochranella anomala	Critically Endangered (CR)	EC		6961	https://amphibiaweb.org/species/6961
Anura	Centrolenidae	Centroleninae	Nymphargus		armatus		Nymphargus armatus	Cochranella armata	Cochranella armata	Critically Endangered (CR)	CO		6962	https://amphibiaweb.org/species/6962
Anura	Centrolenidae	Centroleninae	Nymphargus		balionotus		Cochranella balionota	Cochranella balionota, Centrolene balionotum	Centrolene balionotum	Vulnerable (VU)	EC,CO		1755	https://amphibiaweb.org/species/1755
Anura	Centrolenidae	Centroleninae	Nymphargus		bejaranoi		Nymphargus bejaranoi	Cochranella bejaranoi	Cochranella bejaranoi	Least Concern (LC)	BO		1756	https://amphibiaweb.org/species/1756
Anura	Centrolenidae	Centroleninae	Nymphargus		buenaventura	Buenaventura Glassfrog, Rana de Cristal de Buenaventura	Nymphargus buenaventura			Data Deficient (DD)	EC		6949	https://amphibiaweb.org/species/6949
Anura	Centrolenidae	Centroleninae	Nymphargus		cariticommatus	Unadorned Glassfrog, Rana de Cristal Escueta	Nymphargus cariticommatus	Cochranella cariticommata	Cochranella cariticommata	Data Deficient (DD)	EC		1757	https://amphibiaweb.org/species/1757
Anura	Centrolenidae	Centroleninae	Nymphargus		caucanus						CO		8683	https://amphibiaweb.org/species/8683
Anura	Centrolenidae	Centroleninae	Nymphargus		chami		Nymphargus chami	Cochranella chami	Cochranella chami	Data Deficient (DD)	CO		1758	https://amphibiaweb.org/species/1758
Anura	Centrolenidae	Centroleninae	Nymphargus		chancas		Nymphargus chancas	Cochranella chancas	Cochranella chancas	Data Deficient (DD)	EC,PE		1759	https://amphibiaweb.org/species/1759
Anura	Centrolenidae	Centroleninae	Nymphargus		cochranae	CochranÃ¢â‚¬â„¢s Glassfrog, Rana de Cristal de Cochran	Nymphargus cochranae	Cochranella cochranae	Cochranella cochranae	Vulnerable (VU)	EC		1760	https://amphibiaweb.org/species/1760
Anura	Centrolenidae	Centroleninae	Nymphargus		colomai	Coloma's Glass Frog, Rana de Cristal de Coloma					EC		9201	https://amphibiaweb.org/species/9201
Anura	Centrolenidae	Centroleninae	Nymphargus		cristinae		Nymphargus cristinae	Cochranella cristinae	Cochranella cristinae	Data Deficient (DD)	CO		1761	https://amphibiaweb.org/species/1761
Anura	Centrolenidae	Centroleninae	Nymphargus		garciae	GarcÃƒÂ­aÃ¢â‚¬â„¢s Glassfrog, Rana de Cristal de GarcÃƒÂ­a	Nymphargus garciae	Cochranella garciae	Cochranella garciae	Vulnerable (VU)	CO,EC		1768	https://amphibiaweb.org/species/1768
Anura	Centrolenidae	Centroleninae	Nymphargus		grandisonae	Red-spotted Glassfrog, MeaslesÃ¢â‚¬â„¢ Glassfrog, GrandisonÃ¢â‚¬â„¢s Glassfrog, Rana de Cristal Sarampiona, Rana de Cristal de Grandison.	Nymphargus grandisonae			Least Concern (LC)	EC,CO		1723	https://amphibiaweb.org/species/1723
Anura	Centrolenidae	Centroleninae	Nymphargus		griffithsi	GriffithsÃ¢â‚¬â„¢ Glassfrog, Rana de Cristal de Griffiths.	Nymphargus griffithsi	Cochranella griffithsi	Cochranella griffithsi	Vulnerable (VU)	EC,CO		1771	https://amphibiaweb.org/species/1771
Anura	Centrolenidae	Centroleninae	Nymphargus		humboldti	HumboldtÃ¢â‚¬â„¢s Glassfrog, Rana de cristal de Humboldt.					EC		9202	https://amphibiaweb.org/species/9202
Anura	Centrolenidae	Centroleninae	Nymphargus		ignotus		Nymphargus ignotus	Cochranella ignota	Cochranella ignota	Least Concern (LC)	CO		1773	https://amphibiaweb.org/species/1773
Anura	Centrolenidae	Centroleninae	Nymphargus		lasgralarias	Las Gralarias Glassfrog; Rana de cristal de Las Gralarias					EC		7803	https://amphibiaweb.org/species/7803
Anura	Centrolenidae	Centroleninae	Nymphargus		laurae	LauraÃ¢â‚¬â„¢s Glassfrog, Rana de cristal de Laura	Nymphargus laurae			Critically Endangered (CR)	EC		6960	https://amphibiaweb.org/species/6960
Anura	Centrolenidae	Centroleninae	Nymphargus		lindae	Linda's Glassfrog, Rana de Cristal de Linda					EC		9203	https://amphibiaweb.org/species/9203
Anura	Centrolenidae	Centroleninae	Nymphargus		luminosus		Nymphargus luminosus	Cochranella luminosa	Cochranella luminosa	Endangered (EN)	CO		1774	https://amphibiaweb.org/species/1774
Anura	Centrolenidae	Centroleninae	Nymphargus		luteopunctatus		Nymphargus luteopunctatus	Cochranella luteopunctata	Cochranella luteopunctata	Data Deficient (DD)	CO		5560	https://amphibiaweb.org/species/5560
Anura	Centrolenidae	Centroleninae	Nymphargus		manduriacu	Manduriacu glassfrog;Rana de Cristal de Manduriacu					EC		8966	https://amphibiaweb.org/species/8966
Anura	Centrolenidae	Centroleninae	Nymphargus		mariae	MarÃƒÂ­aÃ¢â‚¬â„¢s Glassfrog, Rana de Cristal de MarÃƒÂ­a	Nymphargus mariae	Nymphargus puyoensis, Centrolene puyoense		Endangered (EN)	EC,PE		1733	https://amphibiaweb.org/species/1733
Anura	Centrolenidae	Centroleninae	Nymphargus		megacheirus	Large-handed Glassfrog, Rana de Cristal de manos grandes	Nymphargus megacheirus	Cochranella megacheira	Cochranella megacheira	Endangered (EN)	EC,CO		1775	https://amphibiaweb.org/species/1775
Anura	Centrolenidae	Centroleninae	Nymphargus		mixomaculatus		Nymphargus mixomaculatus			Data Deficient (DD)	PE		6744	https://amphibiaweb.org/species/6744
Anura	Centrolenidae	Centroleninae	Nymphargus		nephelophila		Nymphargus nephelophila	Cochranella nephelophila	Cochranella nephelophila	Data Deficient (DD)	CO		1778	https://amphibiaweb.org/species/1778
Anura	Centrolenidae	Centroleninae	Nymphargus		ocellatus		Nymphargus ocellatus			Near Threatened (NT)	PE		1779	https://amphibiaweb.org/species/1779
Anura	Centrolenidae	Centroleninae	Nymphargus		oreonympha		Nymphargus oreonympha	Cochranella oreonympha	Cochranella oreonympha	Data Deficient (DD)	CO		1782	https://amphibiaweb.org/species/1782
Anura	Centrolenidae	Centroleninae	Nymphargus		phenax		Nymphargus phenax	Cochranella phenax	Cochranella phenax	Data Deficient (DD)	PE		1784	https://amphibiaweb.org/species/1784
Anura	Centrolenidae	Centroleninae	Nymphargus		pluvialis		Nymphargus pluvialis	Cochranella pluvialis	Cochranella pluvialis	Data Deficient (DD)	BO,PE		1785	https://amphibiaweb.org/species/1785
Anura	Centrolenidae	Centroleninae	Nymphargus		posadae	PosadaÃ¢â‚¬â„¢s Glassfrog, Rana de Cristal de Posada	Nymphargus posadae	Cochranella posadae	Cochranella posadae	Vulnerable (VU)	CO,EC,PE		1786	https://amphibiaweb.org/species/1786
Anura	Centrolenidae	Centroleninae	Nymphargus		prasinus		Nymphargus prasinus	Cochranella prasina	Cochranella prasina	Vulnerable (VU)	CO		1787	https://amphibiaweb.org/species/1787
Anura	Centrolenidae	Centroleninae	Nymphargus		rosada		Nymphargus rosada			Vulnerable (VU)	CO		5562	https://amphibiaweb.org/species/5562
Anura	Centrolenidae	Centroleninae	Nymphargus		ruizi		Nymphargus ruizi	Cochranella ruizi	Cochranella ruizi	Vulnerable (VU)	CO		1793	https://amphibiaweb.org/species/1793
Anura	Centrolenidae	Centroleninae	Nymphargus		siren	Siren Glassfrog, Rana de Cristal sirena	Nymphargus siren	Cochranella siren	Cochranella siren	Vulnerable (VU)	PE,EC,CO		1796	https://amphibiaweb.org/species/1796
Anura	Centrolenidae	Centroleninae	Nymphargus		spilotus		Nymphargus spilotus	Cochranella spilota	Cochranella spilota	Data Deficient (DD)	CO		5563	https://amphibiaweb.org/species/5563
Anura	Centrolenidae	Centroleninae	Nymphargus		sucre	Sucre's Glassfrog, Rana de cristal de Sucre					EC		8011	https://amphibiaweb.org/species/8011
Anura	Centrolenidae	Centroleninae	Nymphargus		truebae		Nymphargus truebae	Cochranella truebae	Cochranella truebae	Critically Endangered (CR)	PE		1802	https://amphibiaweb.org/species/1802
Anura	Centrolenidae	Centroleninae	Nymphargus		vicenteruedai		Nymphargus vicenteruedai			Data Deficient (DD)	CO		7091	https://amphibiaweb.org/species/7091
Anura	Centrolenidae	Centroleninae	Nymphargus		wileyi	WileyÃ¢â‚¬â„¢s Glassfrog, Rana de Cristal de Wiley	Nymphargus wileyi			Data Deficient (DD)	EC		6793	https://amphibiaweb.org/species/6793
Anura	Centrolenidae	Centroleninae	Rulyrana		adiazeta		Rulyrana adiazeta			Vulnerable (VU)	CO		1749	https://amphibiaweb.org/species/1749
Anura	Centrolenidae	Centroleninae	Rulyrana		flavopunctata	Yellow-spotted Glassfrog, Rana de Cristal de Puntos Amarillos	Rulyrana flavopunctata			Least Concern (LC)	CO,EC		1767	https://amphibiaweb.org/species/1767
Anura	Centrolenidae	Centroleninae	Rulyrana		mcdiarmidi	McDiarmidÃ¢â‚¬â„¢s Glassfrog, Rana de Cristal de McDiarmid	Rulyrana mcdiarmidi			Data Deficient (DD)	EC,PE		7223	https://amphibiaweb.org/species/7223
Anura	Centrolenidae	Centroleninae	Rulyrana		saxiscandens		Rulyrana saxiscandens	Rulyrana tangarana, Cochranella croceopodes		Endangered (EN)	PE		1795	https://amphibiaweb.org/species/1795
Anura	Centrolenidae	Centroleninae	Rulyrana		spiculata		Rulyrana spiculata			Near Threatened (NT)	PE		1798	https://amphibiaweb.org/species/1798
Anura	Centrolenidae	Centroleninae	Rulyrana		susatamai		Rulyrana susatamai			Near Threatened (NT)	CO		1800	https://amphibiaweb.org/species/1800
Anura	Centrolenidae	Centroleninae	Sachatamia		albomaculata	Yellow-flecked Cascade Glassfrog White-spotted glassfrog, Rana de Cristal de Cascada, Rana de cristal de puntos blancos	Sachatamia albomaculata			Least Concern (LC)	CO,CR,EC,HN,PA		1750	https://amphibiaweb.org/species/1750
Anura	Centrolenidae	Centroleninae	Sachatamia		electrops						CO		8684	https://amphibiaweb.org/species/8684
Anura	Centrolenidae	Centroleninae	Sachatamia		ilex	Ghost Glass Frog, Limon Giant Glass Frog, HollyÃ¢â‚¬â„¢s Glassfrog, Rana de Cristal de Holly, Rana de Cristal Fantasma.	Sachatamia ilex			Least Concern (LC)	CO,CR,EC,NI,PA		1729	https://amphibiaweb.org/species/1729
Anura	Centrolenidae	Centroleninae	Sachatamia		orejuela	OrejuelaÃ¢â‚¬â„¢s Glassfrog, Rana de Cristal de Orejuela	Sachatamia orejuela	Rulyrana orejuela		Data Deficient (DD)	CO,EC		1781	https://amphibiaweb.org/species/1781
Anura	Centrolenidae	Centroleninae	Sachatamia		punctulata		Sachatamia punctulata			Vulnerable (VU)	CO		1788	https://amphibiaweb.org/species/1788
Anura	Centrolenidae	Centroleninae	Teratohyla		adenocheira		Teratohyla adenocheira			Data Deficient (DD)	BO,BR		6551	https://amphibiaweb.org/species/6551
Anura	Centrolenidae	Centroleninae	Teratohyla		amelie	AmelieÃ¢â‚¬â„¢s Glassfrog, Rana de Cristal de Amelie	Teratohyla amelie			Data Deficient (DD)	EC,PE		6926	https://amphibiaweb.org/species/6926
Anura	Centrolenidae	Centroleninae	Teratohyla		midas	MidasÃ¢â‚¬â„¢ Glassfrog, Rana de Cristal Midas	Teratohyla midas			Least Concern (LC)	BR,EC,GF,PE		1777	https://amphibiaweb.org/species/1777
Anura	Centrolenidae	Centroleninae	Teratohyla		pulverata	Dusty Glassfrog, Rana de Cristal polvosa	Teratohyla pulverata			Least Concern (LC)	CO,CR,EC,HN,NI,PA		1825	https://amphibiaweb.org/species/1825
Anura	Centrolenidae	Centroleninae	Teratohyla		spinosa	Dwarf Glassfrog, Minute Spiny Glassfrog, Rana de Cristal Enana, Rana de Cristal espinosa	Teratohyla spinosa	Centrolenella spinosa, Cochranella spinosa	Centrolenella spinosa, Cochranella spinosa	Least Concern (LC)	CO,CR,EC,HN,NI,PA		1799	https://amphibiaweb.org/species/1799
Anura	Centrolenidae	Centroleninae	Vitreorana		antisthenesi		Vitreorana antisthenesi			Vulnerable (VU)	VE		1805	https://amphibiaweb.org/species/1805
Anura	Centrolenidae	Centroleninae	Vitreorana		baliomma						BR		8226	https://amphibiaweb.org/species/8226
Anura	Centrolenidae	Centroleninae	Vitreorana		castroviejoi		Vitreorana castroviejoi			Data Deficient (DD)	VE		5559	https://amphibiaweb.org/species/5559
Anura	Centrolenidae	Centroleninae	Vitreorana		eurygnatha	Rio Glass Frog; ra-de-vidro, perereca-de-vidro, pererequinha-verde de ventre transparente com focinho curto	Vitreorana eurygnatha			Least Concern (LC)	BR		1811	https://amphibiaweb.org/species/1811
Anura	Centrolenidae	Centroleninae	Vitreorana		franciscana						BR		8395	https://amphibiaweb.org/species/8395
Anura	Centrolenidae	Centroleninae	Vitreorana		gorzulae	Ranita de cristal de Gorzula	Vitreorana gorzulae			Data Deficient (DD)	GY,VE		1722	https://amphibiaweb.org/species/1722
Anura	Centrolenidae	Centroleninae	Vitreorana		helenae		Vitreorana helenae			Data Deficient (DD)	GY,VE		1772	https://amphibiaweb.org/species/1772
Anura	Centrolenidae	Centroleninae	Vitreorana		parvula	Lages Glass Frog, perereca-de-vidro	Vitreorana parvula			Data Deficient (DD)	BR		1822	https://amphibiaweb.org/species/1822
Anura	Centrolenidae	Centroleninae	Vitreorana		ritae	RitaÃ¢â‚¬â„¢s Glassfrog, Rana de Cristal de Rita, perereca-de-vidro	Vitreorana ritae	Cochranella ametarsia, Vitreorana oyampiensis, Centrolene ritae, Centrolenella ritae	Centrolene ritae, Centrolenella ritae	Data Deficient (DD)	BR,CO,EC,GF,GY,PE,SR		1791	https://amphibiaweb.org/species/1791
Anura	Centrolenidae	Centroleninae	Vitreorana		uranoscopa	Humboldt's Glass Frog, perereca-de-vidro, pererequinha-verde de ventre transparente com focinho espatulado	Vitreorana uranoscopa			Least Concern (LC)	BR		1829	https://amphibiaweb.org/species/1829
Anura	Centrolenidae	Hyalinobatrachinae	Celsiella		revocata		Celsiella revocata			Vulnerable (VU)	VE		1826	https://amphibiaweb.org/species/1826
Anura	Centrolenidae	Hyalinobatrachinae	Celsiella		vozmedianoi		Celsiella vozmedianoi			Data Deficient (DD)	VE		5564	https://amphibiaweb.org/species/5564
Anura	Centrolenidae	Hyalinobatrachinae	Hyalinobatrachium		adespinosai	AdelaÃ¢â‚¬â„¢s Glassfrog, Rana de Cristal de Adela					EC		9105	https://amphibiaweb.org/species/9105
Anura	Centrolenidae	Hyalinobatrachinae	Hyalinobatrachium		anachoretus						PE		8215	https://amphibiaweb.org/species/8215
Anura	Centrolenidae	Hyalinobatrachinae	Hyalinobatrachium		aureoguttatum	Sun Glassfrog, Rana de Cristal del Sol	Hyalinobatrachium aureoguttatum			Near Threatened (NT)	CO,EC,PA		1806	https://amphibiaweb.org/species/1806
Anura	Centrolenidae	Hyalinobatrachinae	Hyalinobatrachium		bergeri		Hyalinobatrachium bergeri			Least Concern (LC)	PE,BO		1807	https://amphibiaweb.org/species/1807
Anura	Centrolenidae	Hyalinobatrachinae	Hyalinobatrachium		cappellei						BR,GF,GY,SR,VE		7745	https://amphibiaweb.org/species/7745
Anura	Centrolenidae	Hyalinobatrachinae	Hyalinobatrachium		carlesvilai						BO,PE		7347	https://amphibiaweb.org/species/7347
Anura	Centrolenidae	Hyalinobatrachinae	Hyalinobatrachium		chirripoi	Suretka glass frog, ChirripÃƒÂ³ Glassfrog, Rana de Cristal ChirripÃƒÂ³.	Hyalinobatrachium chirripoi	Hyalinobatrachium cardiacalyptum, Cochranella chirripoi, Centrolenella chirripoi	Hyalinobatrachium cardiacalyptum, Cochranella chirripoi, Centrolenella chirripoi	Least Concern (LC)	CO,CR,EC,HN,PA		1808	https://amphibiaweb.org/species/1808
Anura	Centrolenidae	Hyalinobatrachinae	Hyalinobatrachium		colymbiphyllum		Hyalinobatrachium colymbiphyllum	Hyalinobatrachium crybetes, Centrolenella colymbiphyllum, Cochranella colymbiphyllum	Hyalinobatrachium crybetes, Centrolenella colymbiphyllum, Cochranella colymbiphyllum	Least Concern (LC)	CO,CR,HN,PA		1809	https://amphibiaweb.org/species/1809
Anura	Centrolenidae	Hyalinobatrachinae	Hyalinobatrachium		dianae	Diane's bare-hearted glassfrog, rana de vidrio de Diane					CR		8312	https://amphibiaweb.org/species/8312
Anura	Centrolenidae	Hyalinobatrachinae	Hyalinobatrachium		duranti		Hyalinobatrachium duranti			Data Deficient (DD)	VE		1810	https://amphibiaweb.org/species/1810
Anura	Centrolenidae	Hyalinobatrachinae	Hyalinobatrachium		esmeralda		Hyalinobatrachium esmeralda			Endangered (EN)	CO		5457	https://amphibiaweb.org/species/5457
Anura	Centrolenidae	Hyalinobatrachinae	Hyalinobatrachium		fleischmanni	Fleischmann's glass frog, Ranita de Vidrio, Rana de Cristal de Fleischmann	Hyalinobatrachium fleischmanni	Centrolenella fleischmanni	Centrolenella fleischmanni	Least Concern (LC)	CR,SV,HN,NI		1813	https://amphibiaweb.org/species/1813
Anura	Centrolenidae	Hyalinobatrachinae	Hyalinobatrachium		fragile		Hyalinobatrachium fragile			Vulnerable (VU)	VE		1814	https://amphibiaweb.org/species/1814
Anura	Centrolenidae	Hyalinobatrachinae	Hyalinobatrachium		guairarepanense		Hyalinobatrachium guairarepanense	Hyalinobatrachium guairarepanensis	Hyalinobatrachium guairarepanensis	Endangered (EN)	VE		6550	https://amphibiaweb.org/species/6550
Anura	Centrolenidae	Hyalinobatrachinae	Hyalinobatrachium		iaspidiense		Hyalinobatrachium iaspidiense			Data Deficient (DD)	BR,EC,GF,GY,PE,SR,VE		1815	https://amphibiaweb.org/species/1815
Anura	Centrolenidae	Hyalinobatrachinae	Hyalinobatrachium		ibama		Hyalinobatrachium ibama			Vulnerable (VU)	CO		5458	https://amphibiaweb.org/species/5458
Anura	Centrolenidae	Hyalinobatrachinae	Hyalinobatrachium		kawense						GF		7746	https://amphibiaweb.org/species/7746
Anura	Centrolenidae	Hyalinobatrachinae	Hyalinobatrachium		lemur		Hyalinobatrachium pellucidum	Hyalinobatrachium pellucidum		Near Threatened (NT)	PE		1816	https://amphibiaweb.org/species/1816
Anura	Centrolenidae	Hyalinobatrachinae	Hyalinobatrachium		mesai	SarisariÃƒÂ±ama Glass Frog					VE		7697	https://amphibiaweb.org/species/7697
Anura	Centrolenidae	Hyalinobatrachinae	Hyalinobatrachium		mondolfii		Hyalinobatrachium mondolfii			Least Concern (LC)	BO,BR,CO,GF,GY,PE,SR,VE		5984	https://amphibiaweb.org/species/5984
Anura	Centrolenidae	Hyalinobatrachinae	Hyalinobatrachium		muiraquitan						BR		8627	https://amphibiaweb.org/species/8627
Anura	Centrolenidae	Hyalinobatrachinae	Hyalinobatrachium		munozorum	MuÃƒÂ±ozÃ¢â‚¬â„¢s Glassfrog, Rana de Cristal de MuÃƒÂ±oz	Hyalinobatrachium munozorum	Hyalinobatrachium ruedai		Least Concern (LC)	BO,CO,EC,PE		1818	https://amphibiaweb.org/species/1818
Anura	Centrolenidae	Hyalinobatrachinae	Hyalinobatrachium		orientale	Eastern Glass Frog	Hyalinobatrachium orientale	Centrolenella orientalis, Centrolenella orientalis tobagoensis, Centrolenella orocostalis	Centrolenella orientalis, Centrolenella orientalis tobagoensis, Centrolenella orocostalis	Vulnerable (VU)	TT,VE		1819	https://amphibiaweb.org/species/1819
Anura	Centrolenidae	Hyalinobatrachinae	Hyalinobatrachium		orocostale						VE		7332	https://amphibiaweb.org/species/7332
Anura	Centrolenidae	Hyalinobatrachinae	Hyalinobatrachium		pallidum		Hyalinobatrachium pallidum			Endangered (EN)	VE		1821	https://amphibiaweb.org/species/1821
Anura	Centrolenidae	Hyalinobatrachinae	Hyalinobatrachium		pellucidum	Andean Glassfrog, Rana de Cristal Andina.	Hyalinobatrachium pellucidum			Near Threatened (NT)	EC,PE		1823	https://amphibiaweb.org/species/1823
Anura	Centrolenidae	Hyalinobatrachinae	Hyalinobatrachium		petersi	Powdered Glass Frog, Chiriqui Glass Frog		Hyalinobatrachium pulveratum, Cochranella pulverata	Hyalinobatrachium pulveratum, Cochranella pulverata		CO		6106	https://amphibiaweb.org/species/6106
Anura	Centrolenidae	Hyalinobatrachinae	Hyalinobatrachium		talamancae	Green-striped Glass Frog	Hyalinobatrachium talamancae			Least Concern (LC)	CR		1827	https://amphibiaweb.org/species/1827
Anura	Centrolenidae	Hyalinobatrachinae	Hyalinobatrachium		tatayoi		Hyalinobatrachium tatayoi			Least Concern (LC)	CO,EC,GY,PA,SR,VE		6905	https://amphibiaweb.org/species/6905
Anura	Centrolenidae	Hyalinobatrachinae	Hyalinobatrachium		taylori		Hyalinobatrachium taylori			Least Concern (LC)	GF,GY,SR,VE		1828	https://amphibiaweb.org/species/1828
Anura	Centrolenidae	Hyalinobatrachinae	Hyalinobatrachium		tricolor						GF		7747	https://amphibiaweb.org/species/7747
Anura	Centrolenidae	Hyalinobatrachinae	Hyalinobatrachium		valerioi	Reticulated Glass Frog, Valerio's Glass Frog, La Palma Glass Frog, Ranita de Vidrio,Rana de Cristal Reticulada, Rana de Cristal de Valerio	Hyalinobatrachium valerioi			Least Concern (LC)	EC,CO,PA,CR		1830	https://amphibiaweb.org/species/1830
Anura	Centrolenidae	Hyalinobatrachinae	Hyalinobatrachium		vireovittatum	Starrett's Glass Frog	Hyalinobatrachium vireovittatum			Data Deficient (DD)	CR,PA		1831	https://amphibiaweb.org/species/1831
Anura	Centrolenidae	Hyalinobatrachinae	Hyalinobatrachium		viridissimum						GT,HN,MX		9234	https://amphibiaweb.org/species/9234
Anura	Centrolenidae	Hyalinobatrachinae	Hyalinobatrachium		yaku	Yaku Glassfrog, Rana de Cristal Yaku					EC		8622	https://amphibiaweb.org/species/8622
Anura	Ceratobatrachidae	Alcalinae	Alcalus		baluensis		Alcalus baluensis			Least Concern (LC)	MY		4732	https://amphibiaweb.org/species/4732
Anura	Ceratobatrachidae	Alcalinae	Alcalus		mariae		Alcalus mariae			Data Deficient (DD)	PH		4734	https://amphibiaweb.org/species/4734
Anura	Ceratobatrachidae	Alcalinae	Alcalus		rajae						ID		7748	https://amphibiaweb.org/species/7748
Anura	Ceratobatrachidae	Alcalinae	Alcalus		sariba						MY		4736	https://amphibiaweb.org/species/4736
Anura	Ceratobatrachidae	Alcalinae	Alcalus		tasanae	Tha San Dwarf Cascadefrog	Alcalus tasanae			Vulnerable (VU)	MM,TH		4737	https://amphibiaweb.org/species/4737
Anura	Ceratobatrachidae	Ceratobatrachinae	Cornufer		acrochordus		Cornufer acrochordus	Platymantis acrochorda	Platymantis acrochorda	Data Deficient (DD)	PG,SB		4884	https://amphibiaweb.org/species/4884
Anura	Ceratobatrachidae	Ceratobatrachinae	Cornufer		aculeodactylus		Cornufer aculeodactylus	Platymantis aculeodactyla	Platymantis aculeodactyla, Cornufer aculeodactylus	Least Concern (LC)	PG,SB		4885	https://amphibiaweb.org/species/4885
Anura	Ceratobatrachidae	Ceratobatrachinae	Cornufer		adiastolus		Cornufer adiastolus	Platymantis adiastola	Platymantis adiastola	Data Deficient (DD)	PG		6823	https://amphibiaweb.org/species/6823
Anura	Ceratobatrachidae	Ceratobatrachinae	Cornufer		admiraltiensis		Cornufer admiraltiensis			Least Concern (LC)	PG		7027	https://amphibiaweb.org/species/7027
Anura	Ceratobatrachidae	Ceratobatrachinae	Cornufer		akarithymus		Cornufer akarithymus	Platymantis akarithyma	Platymantis akarithyma	Vulnerable (VU)	PG		4886	https://amphibiaweb.org/species/4886
Anura	Ceratobatrachidae	Ceratobatrachinae	Cornufer		boulengeri		Cornufer boulengeri	Platymantis rhipiphalcus, Platymantis solomonis	Cornufer boulengeri	Least Concern (LC)	PG		4888	https://amphibiaweb.org/species/4888
Anura	Ceratobatrachidae	Ceratobatrachinae	Cornufer		bufoniformis		Cornufer bufoniformis			Least Concern (LC)	PG,SB		4694	https://amphibiaweb.org/species/4694
Anura	Ceratobatrachidae	Ceratobatrachinae	Cornufer		citrinospilus						PG		8066	https://amphibiaweb.org/species/8066
Anura	Ceratobatrachidae	Ceratobatrachinae	Cornufer		desticans						SB		7188	https://amphibiaweb.org/species/7188
Anura	Ceratobatrachidae	Ceratobatrachinae	Cornufer		elegans		Cornufer elegans			Least Concern (LC)	PG		4669	https://amphibiaweb.org/species/4669
Anura	Ceratobatrachidae	Ceratobatrachinae	Cornufer	Batrachylodes	exedrus						PG		8763	https://amphibiaweb.org/species/8763
Anura	Ceratobatrachidae	Ceratobatrachinae	Cornufer		gigas		Cornufer gigas			Data Deficient (DD)	PG		4670	https://amphibiaweb.org/species/4670
Anura	Ceratobatrachidae	Ceratobatrachinae	Cornufer		gilliardi		Cornufer gilliardi		Cornufer gilliardi	Data Deficient (DD)	PG		4893	https://amphibiaweb.org/species/4893
Anura	Ceratobatrachidae	Ceratobatrachinae	Cornufer		guentheri		Cornufer guentheri			Least Concern (LC)	SB,PG		4678	https://amphibiaweb.org/species/4678
Anura	Ceratobatrachidae	Ceratobatrachinae	Cornufer		guppyi		Cornufer guppyi	Discodeles guppyi	Cornufer guppyi	Least Concern (LC)	PG,SB		4895	https://amphibiaweb.org/species/4895
Anura	Ceratobatrachidae	Ceratobatrachinae	Cornufer		hedigeri						SB		8348	https://amphibiaweb.org/species/8348
Anura	Ceratobatrachidae	Ceratobatrachinae	Cornufer		heffernani	Solomon Island Palm Frog					PG,SB		8349	https://amphibiaweb.org/species/8349
Anura	Ceratobatrachidae	Ceratobatrachinae	Cornufer		latro		Cornufer latro			Least Concern (LC)	PG		7028	https://amphibiaweb.org/species/7028
Anura	Ceratobatrachidae	Ceratobatrachinae	Cornufer		macrosceles		Cornufer macrosceles			Data Deficient (DD)	PG		4902	https://amphibiaweb.org/species/4902
Anura	Ceratobatrachidae	Ceratobatrachinae	Cornufer		magnus		Cornufer magnus	Platymantis magna	Platymantis magna	Least Concern (LC)	PG		4903	https://amphibiaweb.org/species/4903
Anura	Ceratobatrachidae	Ceratobatrachinae	Cornufer		malukuna		Cornufer malukuna			Data Deficient (DD)	SB		4696	https://amphibiaweb.org/species/4696
Anura	Ceratobatrachidae	Ceratobatrachinae	Cornufer		mamusiorum		Cornufer mamusiorum			Data Deficient (DD)	PG		6411	https://amphibiaweb.org/species/6411
Anura	Ceratobatrachidae	Ceratobatrachinae	Cornufer		mediodiscus		Cornufer mediodiscus			Least Concern (LC)	PG		4671	https://amphibiaweb.org/species/4671
Anura	Ceratobatrachidae	Ceratobatrachinae	Cornufer		minutus		Cornufer minutus			Least Concern (LC)	PG		4672	https://amphibiaweb.org/species/4672
Anura	Ceratobatrachidae	Ceratobatrachinae	Cornufer		montanus		Cornufer montanus			Least Concern (LC)	PG		4673	https://amphibiaweb.org/species/4673
Anura	Ceratobatrachidae	Ceratobatrachinae	Cornufer		nakanaiorum		Cornufer nakanaiorum			Data Deficient (DD)	PG		6874	https://amphibiaweb.org/species/6874
Anura	Ceratobatrachidae	Ceratobatrachinae	Cornufer		neckeri		Cornufer neckeri		Cornufer neckeri	Least Concern (LC)	PG,SB		4907	https://amphibiaweb.org/species/4907
Anura	Ceratobatrachidae	Ceratobatrachinae	Cornufer		nexipus		Cornufer nexipus			Data Deficient (DD)	PG		4908	https://amphibiaweb.org/species/4908
Anura	Ceratobatrachidae	Ceratobatrachinae	Cornufer		opisthodon		Cornufer opisthodon			Data Deficient (DD)	PG,SB		4697	https://amphibiaweb.org/species/4697
Anura	Ceratobatrachidae	Ceratobatrachinae	Cornufer		paepkei						ID		8450	https://amphibiaweb.org/species/8450
Anura	Ceratobatrachidae	Ceratobatrachinae	Cornufer		papuensis		Cornufer papuensis	Cornufer moszkowskii, Cornufer corrugatus rubristriatus	Cornufer moszkowskii, Cornufer corrugatus rubristriatus	Least Concern (LC)	PG,ID		4909	https://amphibiaweb.org/species/4909
Anura	Ceratobatrachidae	Ceratobatrachinae	Cornufer		parilis						SB		7189	https://amphibiaweb.org/species/7189
Anura	Ceratobatrachidae	Ceratobatrachinae	Cornufer		pelewensis	Palau frog	Platymantis pelewensis	Platymantis pelewensis	Cornufer pelewensis	Least Concern (LC)	PW		4911	https://amphibiaweb.org/species/4911
Anura	Ceratobatrachidae	Ceratobatrachinae	Cornufer		schmidti		Cornufer schmidti			Least Concern (LC)	PG		4916	https://amphibiaweb.org/species/4916
Anura	Ceratobatrachidae	Ceratobatrachinae	Cornufer		solomonis		Cornufer solomonis			Least Concern (LC)	PG,SB		4882	https://amphibiaweb.org/species/4882
Anura	Ceratobatrachidae	Ceratobatrachinae	Cornufer		sulcatus		Cornufer sulcatus			Data Deficient (DD)	PG		6911	https://amphibiaweb.org/species/6911
Anura	Ceratobatrachidae	Ceratobatrachinae	Cornufer		trossulus		Cornufer trossulus			Least Concern (LC)	PG		4674	https://amphibiaweb.org/species/4674
Anura	Ceratobatrachidae	Ceratobatrachinae	Cornufer		vertebralis		Cornufer vertebralis			Least Concern (LC)	PG,SB		4675	https://amphibiaweb.org/species/4675
Anura	Ceratobatrachidae	Ceratobatrachinae	Cornufer		vitianus	Fiji Ground Frog, dreli, botoniviti	Cornufer vitianus	Platymantis vitiana, Hylodes vitianus, Halophila heros	Platymantis vitiana, Hylodes vitianus, Halophila heros	Endangered (EN)	FJ		4920	https://amphibiaweb.org/species/4920
Anura	Ceratobatrachidae	Ceratobatrachinae	Cornufer		vitiensis	Fiji Tree Frog	Cornufer vitiensis	Halophila vitiensis, Halophila chryseus, Cornufer intermedius	Halophila vitiensis, Halophila chryseus, Cornufer intermedius	Near Threatened (NT)	FJ		4921	https://amphibiaweb.org/species/4921
Anura	Ceratobatrachidae	Ceratobatrachinae	Cornufer		vogti		Cornufer vogti			Least Concern (LC)	PG		4698	https://amphibiaweb.org/species/4698
Anura	Ceratobatrachidae	Ceratobatrachinae	Cornufer		weberi		Cornufer weberi	Cornufer papuensis weberi	Cornufer papuensis weberi	Least Concern (LC)	PG,SB		4922	https://amphibiaweb.org/species/4922
Anura	Ceratobatrachidae	Ceratobatrachinae	Cornufer		wolfi		Cornufer wolfi			Least Concern (LC)	PG		4676	https://amphibiaweb.org/species/4676
Anura	Ceratobatrachidae	Ceratobatrachinae	Platymantis		banahao	Banahao Forest Frog	Platymantis banahao			Vulnerable (VU)	PH		5675	https://amphibiaweb.org/species/5675
Anura	Ceratobatrachidae	Ceratobatrachinae	Platymantis		batantae		Cornufer batantae	Cornufer batantae		Data Deficient (DD)	ID		4887	https://amphibiaweb.org/species/4887
Anura	Ceratobatrachidae	Ceratobatrachinae	Platymantis		bayani	Walter's Limestone Forest Frog					PH		7294	https://amphibiaweb.org/species/7294
Anura	Ceratobatrachidae	Ceratobatrachinae	Platymantis		biak						PH		7495	https://amphibiaweb.org/species/7495
Anura	Ceratobatrachidae	Ceratobatrachinae	Platymantis		bimaculatus		Cornufer bimaculatus	Cornufer bimaculatus, Platymantis bimaculata	Platymantis bimaculata	Data Deficient (DD)	ID		6633	https://amphibiaweb.org/species/6633
Anura	Ceratobatrachidae	Ceratobatrachinae	Platymantis		browni		Cornufer browni	Cornufer browni		Least Concern (LC)	PG		5819	https://amphibiaweb.org/species/5819
Anura	Ceratobatrachidae	Ceratobatrachinae	Platymantis		bufonulus		Cornufer bufonulus	Cornufer bufonulus		Data Deficient (DD)			6912	https://amphibiaweb.org/species/6912
Anura	Ceratobatrachidae	Ceratobatrachinae	Platymantis		caesiops						PG		7433	https://amphibiaweb.org/species/7433
Anura	Ceratobatrachidae	Ceratobatrachinae	Platymantis		cagayanensis		Platymantis cagayanensis			Endangered (EN)	PH		6634	https://amphibiaweb.org/species/6634
Anura	Ceratobatrachidae	Ceratobatrachinae	Platymantis		cheesmanae		Cornufer cheesmanae	Cornufer cheesmanae, Cornufer cheesmani	Cornufer cheesmani	Data Deficient (DD)	ID,PG		4889	https://amphibiaweb.org/species/4889
Anura	Ceratobatrachidae	Ceratobatrachinae	Platymantis		cornutus	Horned Forest Frog	Platymantis cornutus	Platymantis cornuta	Platymantis cornuta	Vulnerable (VU)	PH		4890	https://amphibiaweb.org/species/4890
Anura	Ceratobatrachidae	Ceratobatrachinae	Platymantis		corrugatus	Rough-Backed Forest Frog	Platymantis corrugatus	Platymantis corrugata, Hylodes corrugatus, Cornufer corrugatus	Platymantis corrugata, Hylodes corrugatus, Cornufer corrugatus	Least Concern (LC)	PH		4891	https://amphibiaweb.org/species/4891
Anura	Ceratobatrachidae	Ceratobatrachinae	Platymantis		cryptotis		Cornufer cryptotis	Cornufer cryptotis		Least Concern (LC)	ID		6837	https://amphibiaweb.org/species/6837
Anura	Ceratobatrachidae	Ceratobatrachinae	Platymantis		diesmosi	Mt. Malinao Forest Frog	Platymantis diesmosi			Data Deficient (DD)	PH		6910	https://amphibiaweb.org/species/6910
Anura	Ceratobatrachidae	Ceratobatrachinae	Platymantis		dorsalis	Common Forest Frog	Platymantis dorsalis	Platymantis meyeri, Cornufer dorsalis, Halophila platydactyla	Platymantis meyeri, Cornufer dorsalis, Halophila platydactyla	Least Concern (LC)	PH		4892	https://amphibiaweb.org/species/4892
Anura	Ceratobatrachidae	Ceratobatrachinae	Platymantis		guentheri	Guenther's Forest Frog, Gunther's Wrinkled Ground Frog	Platymantis guentheri	Platymantis ingeri, Cornufer guentheri, Cornufer ingeri	Cornufer guentheri, Cornufer ingeri	Vulnerable (VU)	PH		4894	https://amphibiaweb.org/species/4894
Anura	Ceratobatrachidae	Ceratobatrachinae	Platymantis		hazelae	Hazel's Forest Frog	Platymantis hazelae	Philautus hazelae, Cornufer rivularis, Cornufer hazelae	Philautus hazelae, Cornufer rivularis, Cornufer hazelae	Endangered (EN)	PH		4896	https://amphibiaweb.org/species/4896
Anura	Ceratobatrachidae	Ceratobatrachinae	Platymantis		indeprensus		Platymantis indeprensus			Vulnerable (VU)	PH		6635	https://amphibiaweb.org/species/6635
Anura	Ceratobatrachidae	Ceratobatrachinae	Platymantis		insulatus	Island Forest Frog, South Gigante Island Frog	Platymantis insulatus	Platymantis insulata	Platymantis insulata	Critically Endangered (CR)	PH		4898	https://amphibiaweb.org/species/4898
Anura	Ceratobatrachidae	Ceratobatrachinae	Platymantis		isarog	Isarog Forest Frog	Platymantis isarog			Vulnerable (VU)	PH		5676	https://amphibiaweb.org/species/5676
Anura	Ceratobatrachidae	Ceratobatrachinae	Platymantis		lawtoni	Lawton's Forest Frog	Platymantis lawtoni			Endangered (EN)	PH		4899	https://amphibiaweb.org/species/4899
Anura	Ceratobatrachidae	Ceratobatrachinae	Platymantis		levigatus	Smooth-Skinned Forest Frog	Platymantis levigatus	Platymantis levigata	Platymantis levigata	Endangered (EN)	PH		4900	https://amphibiaweb.org/species/4900
Anura	Ceratobatrachidae	Ceratobatrachinae	Platymantis		luzonensis	Luzon Forest Frog	Platymantis luzonensis			Near Threatened (NT)	PH		5677	https://amphibiaweb.org/species/5677
Anura	Ceratobatrachidae	Ceratobatrachinae	Platymantis		macrops		Cornufer macrops	Cornufer macrops	Cornufer macrops	Data Deficient (DD)	PG		4901	https://amphibiaweb.org/species/4901
Anura	Ceratobatrachidae	Ceratobatrachinae	Platymantis		manus						PG		7434	https://amphibiaweb.org/species/7434
Anura	Ceratobatrachidae	Ceratobatrachinae	Platymantis		mimicus		Cornufer mimicus	Cornufer mimicus, Platymantis mimica	Platymantis mimica	Data Deficient (DD)	PG		4905	https://amphibiaweb.org/species/4905
Anura	Ceratobatrachidae	Ceratobatrachinae	Platymantis		mimulus	Diminutive Forest Frog	Platymantis mimulus	Platymantis mimula	Platymantis mimula	Near Threatened (NT)	PH		5678	https://amphibiaweb.org/species/5678
Anura	Ceratobatrachidae	Ceratobatrachinae	Platymantis		montanus	Mountain Forest Frog	Platymantis montanus	Platymantis montana, Cornufer montanus	Platymantis montana, Cornufer montanus	Vulnerable (VU)	PH		5679	https://amphibiaweb.org/species/5679
Anura	Ceratobatrachidae	Ceratobatrachinae	Platymantis		myersi		Cornufer myersi	Cornufer myersi	Cornufer myersi	Data Deficient (DD)	PG		4906	https://amphibiaweb.org/species/4906
Anura	Ceratobatrachidae	Ceratobatrachinae	Platymantis		naomii	Naomi's Forest Frog	Platymantis naomii	Platymantis naomiae	Platymantis naomiae	Vulnerable (VU)	PH		5491	https://amphibiaweb.org/species/5491
Anura	Ceratobatrachidae	Ceratobatrachinae	Platymantis		navjoti	Navjot SodhiÃ¢â‚¬â„¢s Cloud Frog					PH		9245	https://amphibiaweb.org/species/9245
Anura	Ceratobatrachidae	Ceratobatrachinae	Platymantis		negrosensis	Negros Forest Frog	Platymantis negrosensis			Endangered (EN)	PH		5680	https://amphibiaweb.org/species/5680
Anura	Ceratobatrachidae	Ceratobatrachinae	Platymantis		paengi		Platymantis paengi			Data Deficient (DD)	PH		6979	https://amphibiaweb.org/species/6979
Anura	Ceratobatrachidae	Ceratobatrachinae	Platymantis		panayensis	Panay Forest Frog	Platymantis panayensis			Endangered (EN)	PH		5681	https://amphibiaweb.org/species/5681
Anura	Ceratobatrachidae	Ceratobatrachinae	Platymantis		parkeri		Cornufer parkeri	Cornufer parkeri, Cornufer parkeri parkeri, Cornufer parkeri bukanensis	Cornufer parkeri parkeri, Cornufer parkeri bukanensis	Vulnerable (VU)	PG		4910	https://amphibiaweb.org/species/4910
Anura	Ceratobatrachidae	Ceratobatrachinae	Platymantis		polillensis		Platymantis polillensis	Philautus polillensis, Rhacophorus polillensis, Cornufer polillensis	Philautus polillensis, Rhacophorus polillensis, Cornufer polillensis	Endangered (EN)	PH		4912	https://amphibiaweb.org/species/4912
Anura	Ceratobatrachidae	Ceratobatrachinae	Platymantis		pseudodorsalis		Platymantis pseudodorsalis			Vulnerable (VU)	PH		6636	https://amphibiaweb.org/species/6636
Anura	Ceratobatrachidae	Ceratobatrachinae	Platymantis		punctatus		Cornufer punctatus	Cornufer punctatus, Platymantis punctata	Platymantis punctata	Least Concern (LC)	ID		4913	https://amphibiaweb.org/species/4913
Anura	Ceratobatrachidae	Ceratobatrachinae	Platymantis		pygmaeus	Pygmy Forest Frog	Platymantis pygmaeus	Platymantis pygmaea	Platymantis pygmaea	Vulnerable (VU)	PH		5492	https://amphibiaweb.org/species/5492
Anura	Ceratobatrachidae	Ceratobatrachinae	Platymantis		quezoni	Quezon Limestone Forest Frog					PH		8401	https://amphibiaweb.org/species/8401
Anura	Ceratobatrachidae	Ceratobatrachinae	Platymantis		rabori	Rabor's Forest Frog	Platymantis rabori			Vulnerable (VU)	PH		5682	https://amphibiaweb.org/species/5682
Anura	Ceratobatrachidae	Ceratobatrachinae	Platymantis		sierramadrensis		Platymantis sierramadrensis	Platymantis sierramandrensis	Platymantis sierramandrensis	Vulnerable (VU)	PH		5493	https://amphibiaweb.org/species/5493
Anura	Ceratobatrachidae	Ceratobatrachinae	Platymantis		spelaeus	Negros Cave Frog	Platymantis spelaeus	Platymantis spelaea	Platymantis spelaea	Endangered (EN)	PH		4918	https://amphibiaweb.org/species/4918
Anura	Ceratobatrachidae	Ceratobatrachinae	Platymantis		subterrestris	Mt. Data Forest Frog	Platymantis subterrestris	Cornufer subterrestris	Cornufer subterrestris	Endangered (EN)	PH		4919	https://amphibiaweb.org/species/4919
Anura	Ceratobatrachidae	Ceratobatrachinae	Platymantis		taylori		Platymantis taylori			Endangered (EN)	PH		6637	https://amphibiaweb.org/species/6637
Anura	Ceratobatrachidae	Ceratobatrachinae	Platymantis		wuenscheorum		Cornufer wuenscheorum	Cornufer wuenscheorum		Data Deficient (DD)	ID		6759	https://amphibiaweb.org/species/6759
Anura	Ceratobatrachidae	Liuraninae	Liurana		alpina		Liurana alpina			Data Deficient (DD)	CN		5665	https://amphibiaweb.org/species/5665
Anura	Ceratobatrachidae	Liuraninae	Liurana		himalayana	Himalayan papilla-tongued frog					IN		9123	https://amphibiaweb.org/species/9123
Anura	Ceratobatrachidae	Liuraninae	Liurana		indica	Indian papilla-tongued frog					IN		9124	https://amphibiaweb.org/species/9124
Anura	Ceratobatrachidae	Liuraninae	Liurana		medogensis		Liurana medogensis			Data Deficient (DD)	CN,IN		5320	https://amphibiaweb.org/species/5320
Anura	Ceratobatrachidae	Liuraninae	Liurana		minuta	Minute papilla-tongued frog					IN		9125	https://amphibiaweb.org/species/9125
Anura	Ceratobatrachidae	Liuraninae	Liurana		reticulata		Ingerana reticulata	Ingerana reticulata		Data Deficient (DD)	CN		4735	https://amphibiaweb.org/species/4735
Anura	Ceratobatrachidae	Liuraninae	Liurana		vallecula	Valley Papilla-tongued Frog; He Gu She Tu Wa (Ã¦Â²Â³Ã¨Â°Â·Ã¨Ë†Å’Ã§ÂªÂÃ¨â€ºâ„¢)					CN		8992	https://amphibiaweb.org/species/8992
Anura	Ceratobatrachidae	Liuraninae	Liurana		xizangensis		Liurana xizangensis			Data Deficient (DD)	CN		4739	https://amphibiaweb.org/species/4739
Anura	Ceratophryidae		Ceratophrys		aurita		Ceratophrys aurita	Ceratophrys varia	Ceratophrys varia	Least Concern (LC)	BR		5718	https://amphibiaweb.org/species/5718
Anura	Ceratophryidae		Ceratophrys		calcarata	Venezuelan Horned Frog, Colombian Horned Frog	Ceratophrys calcarata			Least Concern (LC)	VE,CO		5719	https://amphibiaweb.org/species/5719
Anura	Ceratophryidae		Ceratophrys		cornuta	Surinam Horned Frog	Ceratophrys cornuta			Least Concern (LC)	GF,SR,BO,PE,EC,CO,BR,VE		5720	https://amphibiaweb.org/species/5720
Anura	Ceratophryidae		Ceratophrys		cranwelli		Ceratophrys cranwelli			Least Concern (LC)	PY,BR,BO,AR		5721	https://amphibiaweb.org/species/5721
Anura	Ceratophryidae		Ceratophrys		joazeirensis		Ceratophrys joazeirensis			Data Deficient (DD)	BR		5722	https://amphibiaweb.org/species/5722
Anura	Ceratophryidae		Ceratophrys		ornata	Bell's Horned Frog, Escuerzo	Ceratophrys ornata			Near Threatened (NT)	AR,BR,UY		5723	https://amphibiaweb.org/species/5723
Anura	Ceratophryidae		Ceratophrys		stolzmanni		Ceratophrys stolzmanni			Vulnerable (VU)	PE,EC		5724	https://amphibiaweb.org/species/5724
Anura	Ceratophryidae		Ceratophrys		testudo		Ceratophrys testudo			Data Deficient (DD)	BR,EC		5725	https://amphibiaweb.org/species/5725
Anura	Ceratophryidae		Chacophrys		pierottii		Chacophrys pierottii			Least Concern (LC)	AR,BO		5726	https://amphibiaweb.org/species/5726
Anura	Ceratophryidae		Lepidobatrachus		asper		Lepidobatrachus asper	Lepidobatrachus salinicola, Ceratophrys aspera	Lepidobatrachus salinicola, Ceratophrys aspera	Near Threatened (NT)	AR,BR,PY		5601	https://amphibiaweb.org/species/5601
Anura	Ceratophryidae		Lepidobatrachus		laevis	Budgett's Frog, Escuerzo de agua	Lepidobatrachus laevis			Least Concern (LC)	AR,BO,PY		5602	https://amphibiaweb.org/species/5602
Anura	Ceratophryidae		Lepidobatrachus		llanensis		Lepidobatrachus llanensis			Least Concern (LC)	AR		5603	https://amphibiaweb.org/species/5603
Anura	Ceuthomantidae		Ceuthomantis		aracamuni		Ceuthomantis aracamuni			Vulnerable (VU)	VE		6796	https://amphibiaweb.org/species/6796
Anura	Ceuthomantidae		Ceuthomantis		cavernibardus	Ranita Tamacuarina Cantora (Spanish)	Ceuthomantis cavernibardus			Data Deficient (DD)	BR,VE		5734	https://amphibiaweb.org/species/5734
Anura	Ceuthomantidae		Ceuthomantis		duellmani		Ceuthomantis duellmani			Least Concern (LC)	VE		7496	https://amphibiaweb.org/species/7496
Anura	Ceuthomantidae		Ceuthomantis		smaragdinus						GY		7378	https://amphibiaweb.org/species/7378
Anura	Conrauidae		Conraua		alleni		Conraua alleni			Vulnerable (VU)	TG,LR,SL		4687	https://amphibiaweb.org/species/4687
Anura	Conrauidae		Conraua		beccarii		Conraua beccarii			Least Concern (LC)	ET		4688	https://amphibiaweb.org/species/4688
Anura	Conrauidae		Conraua		crassipes		Conraua crassipes			Least Concern (LC)	CM,CG,CD,GQ,GA,NG		4689	https://amphibiaweb.org/species/4689
Anura	Conrauidae		Conraua		derooi		Conraua derooi			Critically Endangered (CR)	GH,TG		4690	https://amphibiaweb.org/species/4690
Anura	Conrauidae		Conraua		goliath	Goliath frog, Giant frog	Conraua goliath			Endangered (EN)	GQ,CM		4691	https://amphibiaweb.org/species/4691
Anura	Conrauidae		Conraua		robusta		Conraua robusta			Vulnerable (VU)	CM,NG		4692	https://amphibiaweb.org/species/4692
Anura	Craugastoridae		Craugastor	Campbellius	adamastus		Craugastor adamastus	Eleutherodactylus adamastus	Eleutherodactylus adamastus	Data Deficient (DD)	GT		2752	https://amphibiaweb.org/species/2752
Anura	Craugastoridae		Craugastor	Craugastor	aenigmaticus	Montane Dirt Frog					CR,PA		9010	https://amphibiaweb.org/species/9010
Anura	Craugastoridae		Craugastor	Hylactophryne	alfredi		Craugastor alfredi	Eleutherodactylus alfredi	Eleutherodactylus alfredi	Vulnerable (VU)	GT,MX		2758	https://amphibiaweb.org/species/2758
Anura	Craugastoridae		Craugastor	Craugastor	amniscola		Craugastor amniscola	Eleutherodactylus amniscola	Eleutherodactylus amniscola	Data Deficient (DD)	GT		5384	https://amphibiaweb.org/species/5384
Anura	Craugastoridae		Craugastor	Craugastor	anciano		Craugastor anciano	Eleutherodactylus anciano	Eleutherodactylus anciano	Critically Endangered (CR)	HN		2765	https://amphibiaweb.org/species/2765
Anura	Craugastoridae		Craugastor	Craugastor	andi		Craugastor andi	Eleutherodactylus andi	Eleutherodactylus andi	Critically Endangered (CR)	PA,CR		2766	https://amphibiaweb.org/species/2766
Anura	Craugastoridae		Craugastor	Craugastor	angelicus		Craugastor angelicus	Eleutherodactylus angelicus	Eleutherodactylus angelicus	Critically Endangered (CR)	CR		2769	https://amphibiaweb.org/species/2769
Anura	Craugastoridae		Craugastor	Craugastor	aphanus		Craugastor aphanus	Eleutherodactylus aphanus	Eleutherodactylus aphanus	Vulnerable (VU)	GT		2776	https://amphibiaweb.org/species/2776
Anura	Craugastoridae		Craugastor	Hylactophryne	augusti	Barking Frog, Western Barking Frog (<i>C. a. cactorum</i>), Eastern Barking Frog (<i>C. a. latrans</i>)	Craugastor augusti	Hylactophryne augusti, Hylodes augusti, Eleutherodactylus augusti	Hylactophryne augusti, Hylodes augusti, Eleutherodactylus augusti	Least Concern (LC)	US,MX		2784	https://amphibiaweb.org/species/2784
Anura	Craugastoridae		Craugastor	Craugastor	aurilegulus		Craugastor aurilegulus	Eleutherodactylus aurilegulus	Eleutherodactylus aurilegulus	Endangered (EN)	HN		2787	https://amphibiaweb.org/species/2787
Anura	Craugastoridae		Craugastor	Craugastor	azueroensis		Craugastor azueroensis	Eleutherodactylus azueroensis	Eleutherodactylus azueroensis	Endangered (EN)	PA		2788	https://amphibiaweb.org/species/2788
Anura	Craugastoridae		Craugastor	Hylactophryne	batrachylus		Craugastor batrachylus	Eleutherodactylus batrachylus	Eleutherodactylus batrachylus	Data Deficient (DD)	MX		2796	https://amphibiaweb.org/species/2796
Anura	Craugastoridae		Craugastor	Craugastor	berkenbuschii		Craugastor berkenbuschii	Eleutherodactylus berkenbuschii	Eleutherodactylus berkenbuschii	Near Threatened (NT)	MX		2799	https://amphibiaweb.org/species/2799
Anura	Craugastoridae		Craugastor	Craugastor	blairi	Blair's Dirt Frog					PA		9005	https://amphibiaweb.org/species/9005
Anura	Craugastoridae		Craugastor	Hylactophryne	bocourti		Craugastor bocourti	Eleutherodactylus bocourti	Eleutherodactylus bocourti	Vulnerable (VU)	GT		2808	https://amphibiaweb.org/species/2808
Anura	Craugastoridae		Craugastor	Craugastor	bransfordii		Craugastor bransfordii	Eleutherodactylus bransfordii, Eleutherodactylus costaricensis, Eleutherodactylus rearki	Eleutherodactylus bransfordii, Eleutherodactylus costaricensis, Eleutherodactylus rearki	Least Concern (LC)	PA,CR,NI,HN		2812	https://amphibiaweb.org/species/2812
Anura	Craugastoridae		Craugastor	Craugastor	brocchi		Craugastor brocchi	Eleutherodactylus brocchi	Eleutherodactylus brocchi	Vulnerable (VU)	MX,GT		2818	https://amphibiaweb.org/species/2818
Anura	Craugastoridae		Craugastor	Hylactophryne	campbelli		Craugastor campbelli			Data Deficient (DD)	GT		6658	https://amphibiaweb.org/species/6658
Anura	Craugastoridae		Craugastor	Craugastor	castanedai						HN		8848	https://amphibiaweb.org/species/8848
Anura	Craugastoridae		Craugastor	Craugastor	catalinae		Craugastor catalinae	Eleutherodactylus catalinae	Eleutherodactylus catalinae	Critically Endangered (CR)	CR,PA		5395	https://amphibiaweb.org/species/5395
Anura	Craugastoridae		Craugastor	Craugastor	chac		Craugastor chac	Eleutherodactylus chac	Eleutherodactylus chac	Near Threatened (NT)	HN,BZ,GT		2842	https://amphibiaweb.org/species/2842
Anura	Craugastoridae		Craugastor	Craugastor	charadra		Craugastor charadra	Eleutherodactylus charadra	Eleutherodactylus charadra	Endangered (EN)	GT,HN		5388	https://amphibiaweb.org/species/5388
Anura	Craugastoridae		Craugastor		chingopetaca		Craugastor chingopetaca			Data Deficient (DD)	NI		6891	https://amphibiaweb.org/species/6891
Anura	Craugastoridae		Craugastor	Campbellius	chrysozetetes		Craugastor chrysozetetes	Eleutherodactylus chrysozetetes	Eleutherodactylus chrysozetetes	Extinct (EX)	HN		2850	https://amphibiaweb.org/species/2850
Anura	Craugastoridae		Craugastor	Craugastor	coffeus		Craugastor coffeus	Eleutherodactylus coffeus	Eleutherodactylus coffeus	Critically Endangered (CR)	HN		5431	https://amphibiaweb.org/species/5431
Anura	Craugastoridae		Craugastor	Craugastor	crassidigitus	Isla Bonita Robber Frog	Craugastor crassidigitus	Eleutherodactylus crassidigitus	Eleutherodactylus crassidigitus	Least Concern (LC)	CO,CR,PA		2863	https://amphibiaweb.org/species/2863
Anura	Craugastoridae		Craugastor	Campbellius	cruzi		Craugastor cruzi	Eleutherodactylus cruzi	Eleutherodactylus cruzi	Critically Endangered (CR)	CO,HN		2871	https://amphibiaweb.org/species/2871
Anura	Craugastoridae		Craugastor	Craugastor	cuaquero		Craugastor cuaquero	Eleutherodactylus cuaquero	Eleutherodactylus cuaquero	Data Deficient (DD)	CR		2874	https://amphibiaweb.org/species/2874
Anura	Craugastoridae		Craugastor	Hylactophryne	cyanochthebius		Craugastor cyanochthebius			Near Threatened (NT)	HN		6750	https://amphibiaweb.org/species/6750
Anura	Craugastoridae		Craugastor	Campbellius	daryi		Craugastor daryi	Eleutherodactylus daryi	Eleutherodactylus daryi	Endangered (EN)	GT		2882	https://amphibiaweb.org/species/2882
Anura	Craugastoridae		Craugastor	Hylactophryne	decoratus		Craugastor decoratus	Eleutherodactylus decoratus	Eleutherodactylus decoratus	Vulnerable (VU)	MX		2883	https://amphibiaweb.org/species/2883
Anura	Craugastoridae		Craugastor	Craugastor	emcelae		Craugastor emcelae	Eleutherodactylus emcelae	Eleutherodactylus emcelae	Critically Endangered (CR)	PA		2903	https://amphibiaweb.org/species/2903
Anura	Craugastoridae		Craugastor	Craugastor	emleni		Craugastor emleni	Eleutherodactylus emleni, Eleutherodactylus ranoides nubicola, Eleutherodactylus ranoides emleni	Eleutherodactylus emleni, Eleutherodactylus ranoides nubicola, Eleutherodactylus ranoides emleni	Critically Endangered (CR)	HN		5391	https://amphibiaweb.org/species/5391
Anura	Craugastoridae		Craugastor	Campbellius	epochthidius		Craugastor epochthidius	Eleutherodactylus epochthidius	Eleutherodactylus epochthidius	Critically Endangered (CR)	HN		5742	https://amphibiaweb.org/species/5742
Anura	Craugastoridae		Craugastor	Craugastor	escoces		Craugastor escoces	Eleutherodactylus escoces	Eleutherodactylus escoces	Extinct (EX)	CR		2913	https://amphibiaweb.org/species/2913
Anura	Craugastoridae		Craugastor		evanesco						PA		7589	https://amphibiaweb.org/species/7589
Anura	Craugastoridae		Craugastor	Campbellius	fecundus		Craugastor fecundus	Eleutherodactylus fecundus	Eleutherodactylus fecundus	Critically Endangered (CR)	HN		5533	https://amphibiaweb.org/species/5533
Anura	Craugastoridae		Craugastor	Craugastor	fitzingeri		Craugastor fitzingeri	Eleutherodactylus fitzingeri, Eleutherodactylus griseus, Eleutherodactylus nubilus	Eleutherodactylus fitzingeri, Eleutherodactylus griseus, Eleutherodactylus nubilus	Least Concern (LC)	CO,CR,HN,NI,PA		2918	https://amphibiaweb.org/species/2918
Anura	Craugastoridae		Craugastor	Craugastor	fleischmanni		Craugastor fleischmanni	Eleutherodactylus fleischmanni	Eleutherodactylus fleischmanni	Critically Endangered (CR)	PA,CR		2920	https://amphibiaweb.org/species/2920
Anura	Craugastoridae		Craugastor	Craugastor	gabbi	Gabb's Dirt Frog					CR,PA		8493	https://amphibiaweb.org/species/8493
Anura	Craugastoridae		Craugastor	Hylactophryne	galacticorhinus	White-snouted Robber Frog					MX		6337	https://amphibiaweb.org/species/6337
Anura	Craugastoridae		Craugastor	Hylactophryne	glaucus		Craugastor glaucus	Eleutherodactylus glaucus	Eleutherodactylus glaucus	Critically Endangered (CR)	MX		2936	https://amphibiaweb.org/species/2936
Anura	Craugastoridae		Craugastor	Craugastor	gollmeri		Craugastor gollmeri	Eleutherodactylus gollmeri	Eleutherodactylus gollmeri	Least Concern (LC)	PA,CR		2937	https://amphibiaweb.org/species/2937
Anura	Craugastoridae		Craugastor	Craugastor	greggi		Craugastor greggi	Eleutherodactylus chiquito, Eleutherodactylus greggi	Eleutherodactylus chiquito, Eleutherodactylus greggi	Critically Endangered (CR)	MX,GT		2945	https://amphibiaweb.org/species/2945
Anura	Craugastoridae		Craugastor	Hylactophryne	guerreroensis		Craugastor guerreroensis	Eleutherodactylus guerreroensis	Eleutherodactylus guerreroensis	Critically Endangered (CR)	MX		2953	https://amphibiaweb.org/species/2953
Anura	Craugastoridae		Craugastor	Craugastor	gulosus		Craugastor gulosus	Eleutherodactylus gulosus	Eleutherodactylus gulosus	Critically Endangered (CR)	CR,PA		5989	https://amphibiaweb.org/species/5989
Anura	Craugastoridae		Craugastor		gutschei						HN		8849	https://amphibiaweb.org/species/8849
Anura	Craugastoridae		Craugastor	Craugastor	hobartsmithi		Craugastor hobartsmithi	Eleutherodactylus hobartsmithi	Eleutherodactylus hobartsmithi	Endangered (EN)	MX		6645	https://amphibiaweb.org/species/6645
Anura	Craugastoridae		Craugastor	Craugastor	inachus		Craugastor inachus	Eleutherodactylus inachus	Eleutherodactylus inachus	Endangered (EN)	GT		5385	https://amphibiaweb.org/species/5385
Anura	Craugastoridae		Craugastor	Craugastor	laevissimus		Craugastor laevissimus	Eleutherodactylus laevissimus	Eleutherodactylus laevissimus	Endangered (EN)	HN,NI		6150	https://amphibiaweb.org/species/6150
Anura	Craugastoridae		Craugastor	Craugastor	laticeps		Craugastor laticeps	Eleutherodactylus laticeps, Eleutherodactylus werleri, Hylodes laticeps	Eleutherodactylus laticeps, Eleutherodactylus werleri, Hylodes laticeps	Near Threatened (NT)	MX,HN,BZ,GT		3008	https://amphibiaweb.org/species/3008
Anura	Craugastoridae		Craugastor	Craugastor	lauraster		Craugastor lauraster	Eleutherodactylus lauraster	Eleutherodactylus lauraster	Endangered (EN)	NI,HN		3011	https://amphibiaweb.org/species/3011
Anura	Craugastoridae		Craugastor	Craugastor	lineatus		Craugastor lineatus	Eleutherodactylus anzuetoi, Eleutherodactylus lineatus, Eleutherodactylus macdougalli	Eleutherodactylus anzuetoi, Eleutherodactylus lineatus, Eleutherodactylus macdougalli	Critically Endangered (CR)	MX,GT		3023	https://amphibiaweb.org/species/3023
Anura	Craugastoridae		Craugastor	Craugastor	loki		Craugastor loki	Eleutherodactylus loki, Eleutherodactylus sanmartinensis	Eleutherodactylus loki, Eleutherodactylus sanmartinensis	Least Concern (LC)	BZ,GT,HN,MX		6604	https://amphibiaweb.org/species/6604
Anura	Craugastoridae		Craugastor	Craugastor	longirostris		Craugastor longirostris	Eleutherodactylus longirostris	Eleutherodactylus longirostris	Least Concern (LC)	PA,EC,CO		3028	https://amphibiaweb.org/species/3028
Anura	Craugastoridae		Craugastor	Campbellius	matudai		Craugastor matudai	Eleutherodactylus matudai	Eleutherodactylus matudai	Vulnerable (VU)	GT,MX		3046	https://amphibiaweb.org/species/3046
Anura	Craugastoridae		Craugastor	Craugastor	megacephalus		Craugastor megacephalus	Eleutherodactylus megacephalus	Eleutherodactylus megacephalus	Least Concern (LC)	CR,HN,NI,PA		5988	https://amphibiaweb.org/species/5988
Anura	Craugastoridae		Craugastor	Hylactophryne	megalotympanum		Craugastor megalotympanum	Eleutherodactylus megalotympanum	Eleutherodactylus megalotympanum	Critically Endangered (CR)	MX		3051	https://amphibiaweb.org/species/3051
Anura	Craugastoridae		Craugastor	Craugastor	melanostictus	Black-lined Robber Frog	Craugastor melanostictus	Eleutherodactylus melanostictus, Eleutherodactylus platyrhynchus, Lithodytes melanostictus	Eleutherodactylus melanostictus, Eleutherodactylus platyrhynchus, Lithodytes melanostictus	Least Concern (LC)	PA,CR		3054	https://amphibiaweb.org/species/3054
Anura	Craugastoridae		Craugastor	Craugastor	merendonensis		Craugastor merendonensis	Eleutherodactylus merendonensis	Eleutherodactylus merendonensis	Critically Endangered (CR)	HN		3057	https://amphibiaweb.org/species/3057
Anura	Craugastoridae		Craugastor		metriosistus		Craugastor metriosistus			Least Concern (LC)	CO		8430	https://amphibiaweb.org/species/8430
Anura	Craugastoridae		Craugastor	Craugastor	mexicanus		Craugastor mexicanus	Eleutherodactylus lineatissimus, Eleutherodactylus mexicanus, Eleutherodactylus oaxacae	Eleutherodactylus lineatissimus, Eleutherodactylus mexicanus, Eleutherodactylus oaxacae	Least Concern (LC)	MX		3059	https://amphibiaweb.org/species/3059
Anura	Craugastoridae		Craugastor	Campbellius	milesi		Craugastor milesi	Eleutherodactylus milesi	Eleutherodactylus milesi	Critically Endangered (CR)	HN		3060	https://amphibiaweb.org/species/3060
Anura	Craugastoridae		Craugastor	Craugastor	mimus		Craugastor mimus	Eleutherodactylus mimus	Eleutherodactylus mimus	Least Concern (LC)	CR,HN,NI		3061	https://amphibiaweb.org/species/3061
Anura	Craugastoridae		Craugastor	Craugastor	monnichorum		Craugastor monnichorum	Eleutherodactylus monnichorum	Eleutherodactylus monnichorum	Data Deficient (DD)	PA		3069	https://amphibiaweb.org/species/3069
Anura	Craugastoridae		Craugastor		montanus		Craugastor montanus	Craugastor sartori, Eleutherodactylus sartori, Microbatrachylus montanus	Eleutherodactylus sartori, Microbatrachylus montanus, Craugastor montanus	Endangered (EN)	MX		3198	https://amphibiaweb.org/species/3198
Anura	Craugastoridae		Craugastor	Campbellius	myllomyllon		Craugastor myllomyllon	Eleutherodactylus myllomyllon	Eleutherodactylus myllomyllon	Data Deficient (DD)	GT		5858	https://amphibiaweb.org/species/5858
Anura	Craugastoridae		Craugastor	Hylactophryne	nefrens		Craugastor nefrens			Data Deficient (DD)	GT		6659	https://amphibiaweb.org/species/6659
Anura	Craugastoridae		Craugastor	Craugastor	noblei		Craugastor noblei	Eleutherodactylus noblei	Eleutherodactylus noblei	Least Concern (LC)	PA,NI,CR,HN		3085	https://amphibiaweb.org/species/3085
Anura	Craugastoridae		Craugastor	Craugastor	obesus		Craugastor obesus	Eleutherodactylus obesus	Eleutherodactylus obesus	Critically Endangered (CR)	CR,PA		5396	https://amphibiaweb.org/species/5396
Anura	Craugastoridae		Craugastor	Craugastor	occidentalis		Craugastor occidentalis	Eleutherodactylus occidentalis	Eleutherodactylus occidentalis	Data Deficient (DD)	MX		3090	https://amphibiaweb.org/species/3090
Anura	Craugastoridae		Craugastor	Craugastor	olanchano		Craugastor olanchano	Eleutherodactylus olanchano	Eleutherodactylus olanchano	Critically Endangered (CR)	HN		5392	https://amphibiaweb.org/species/5392
Anura	Craugastoridae		Craugastor	Craugastor	omiltemanus		Craugastor omiltemanus	Eleutherodactylus calcitrans, Eleutherodactylus omiltemanus, Syrrhaphus omiltemanus	Eleutherodactylus calcitrans, Eleutherodactylus omiltemanus, Syrrhaphus omiltemanus	Endangered (EN)	MX		3096	https://amphibiaweb.org/species/3096
Anura	Craugastoridae		Craugastor	Campbellius	omoaensis		Craugastor omoaensis	Eleutherodactylus omoaensis	Eleutherodactylus omoaensis	Critically Endangered (CR)	HN		5534	https://amphibiaweb.org/species/5534
Anura	Craugastoridae		Craugastor	Craugastor	opimus		Craugastor opimus	Eleutherodactylus opimus	Eleutherodactylus opimus	Least Concern (LC)	CO,PA		5991	https://amphibiaweb.org/species/5991
Anura	Craugastoridae		Craugastor	Craugastor	palenque		Craugastor palenque	Eleutherodactylus palenque	Eleutherodactylus palenque	Data Deficient (DD)	GT,MX		5382	https://amphibiaweb.org/species/5382
Anura	Craugastoridae		Craugastor	Craugastor	pechorum		Craugastor pechorum	Eleutherodactylus pechorum	Eleutherodactylus pechorum	Endangered (EN)	HN		5390	https://amphibiaweb.org/species/5390
Anura	Craugastoridae		Craugastor	Craugastor	pelorus		Craugastor pelorus	Eleutherodactylus pelorus	Eleutherodactylus pelorus	Data Deficient (DD)			5381	https://amphibiaweb.org/species/5381
Anura	Craugastoridae		Craugastor	Craugastor	persimilis		Craugastor persimilis	Eleutherodactylus persimilis	Eleutherodactylus persimilis	Vulnerable (VU)	CR		6605	https://amphibiaweb.org/species/6605
Anura	Craugastoridae		Craugastor	Craugastor	phasma		Craugastor phasma	Eleutherodactylus phasma	Eleutherodactylus phasma	Data Deficient (DD)	CR		3128	https://amphibiaweb.org/species/3128
Anura	Craugastoridae		Craugastor	Craugastor	podiciferus		Craugastor podiciferus	Craugastor jota, Eleutherodactylus podiciferus	Eleutherodactylus podiciferus	Near Threatened (NT)	PA,CR		3141	https://amphibiaweb.org/species/3141
Anura	Craugastoridae		Craugastor	Hylactophryne	polymniae		Craugastor polymniae	Eleutherodactylus polymniae	Eleutherodactylus polymniae	Critically Endangered (CR)	MX		3142	https://amphibiaweb.org/species/3142
Anura	Craugastoridae		Craugastor	Craugastor	polyptychus		Craugastor polyptychus	Eleutherodactylus polyptychus	Eleutherodactylus polyptychus	Least Concern (LC)	CR,NI,PA		6606	https://amphibiaweb.org/species/6606
Anura	Craugastoridae		Craugastor	Craugastor	pozo		Craugastor pozo	Eleutherodactylus pozo	Eleutherodactylus pozo	Critically Endangered (CR)	MX		3145	https://amphibiaweb.org/species/3145
Anura	Craugastoridae		Craugastor	Craugastor	psephosypharus		Craugastor psephosypharus	Eleutherodactylus psephosypharus	Eleutherodactylus psephosypharus	Vulnerable (VU)	GT,BZ		3152	https://amphibiaweb.org/species/3152
Anura	Craugastoridae		Craugastor	Craugastor	punctariolus	Bob's Robber Frog	Craugastor punctariolus	Eleutherodactylus punctariolus, Hyla punctariola	Eleutherodactylus punctariolus, Hyla punctariola	Endangered (EN)	PA		3156	https://amphibiaweb.org/species/3156
Anura	Craugastoridae		Craugastor	Craugastor	pygmaeus		Craugastor pygmaeus	Eleutherodactylus pygmaeus, Microbatrachylus albolabris, Microbatrachylus pygmaeus	Eleutherodactylus pygmaeus, Microbatrachylus albolabris, Microbatrachylus pygmaeus	Vulnerable (VU)	GT,MX		3159	https://amphibiaweb.org/species/3159
Anura	Craugastoridae		Craugastor	Craugastor	raniformis		Craugastor raniformis	Eleutherodactylus raniformis	Eleutherodactylus raniformis	Least Concern (LC)	CO,PA		3166	https://amphibiaweb.org/species/3166
Anura	Craugastoridae		Craugastor	Craugastor	ranoides		Craugastor ranoides	Eleutherodactylus pittieri, Eleutherodactylus ranoides, Lithodytes ranoides	Eleutherodactylus pittieri, Eleutherodactylus ranoides, Lithodytes ranoides	Critically Endangered (CR)	CR,NI,PA		6154	https://amphibiaweb.org/species/6154
Anura	Craugastoridae		Craugastor	Craugastor	rayo		Craugastor rayo	Eleutherodactylus rayo	Eleutherodactylus rayo	Data Deficient (DD)	CR		3167	https://amphibiaweb.org/species/3167
Anura	Craugastoridae		Craugastor	Craugastor	rhodopis		Craugastor rhodopis	Eleutherodactylus beatae, Eleutherodactylus dorsoconcolor, Eleutherodactylus dunni	Eleutherodactylus beatae, Eleutherodactylus dorsoconcolor, Eleutherodactylus dunni	Vulnerable (VU)	BZ,SV,GT,MX		3172	https://amphibiaweb.org/species/3172
Anura	Craugastoridae		Craugastor	Craugastor	rhyacobatrachus		Craugastor rhyacobatrachus	Eleutherodactylus rhyacobatrachus	Eleutherodactylus rhyacobatrachus	Endangered (EN)	CR,PA		5394	https://amphibiaweb.org/species/5394
Anura	Craugastoridae		Craugastor	Craugastor	rivulus		Craugastor rivulus	Eleutherodactylus rivulus	Eleutherodactylus rivulus	Vulnerable (VU)	GT		5383	https://amphibiaweb.org/species/5383
Anura	Craugastoridae		Craugastor	Craugastor	rostralis		Craugastor rostralis	Eleutherodactylus rostralis	Eleutherodactylus rostralis	Near Threatened (NT)	HN,GT		3182	https://amphibiaweb.org/species/3182
Anura	Craugastoridae		Craugastor	Craugastor	rugosus		Craugastor rugosus	Eleutherodactylus florulentus, Eleutherodactylus rugosus	Eleutherodactylus florulentus, Eleutherodactylus rugosus	Least Concern (LC)	CR,PA		5990	https://amphibiaweb.org/species/5990
Anura	Craugastoridae		Craugastor	Craugastor	rugulosus	Rugulose rainfrog	Craugastor rugulosus	Eleutherodactylus palmatus, Eleutherodactylus rugulosus, Liyla rugulosa	Eleutherodactylus palmatus, Eleutherodactylus rugulosus, Liyla rugulosa	Least Concern (LC)	MX		3188	https://amphibiaweb.org/species/3188
Anura	Craugastoridae		Craugastor	Craugastor	rupinius		Craugastor rupinius	Eleutherodactylus rupinius	Eleutherodactylus rupinius	Least Concern (LC)	GT		5380	https://amphibiaweb.org/species/5380
Anura	Craugastoridae		Craugastor	Craugastor	sabrinus		Craugastor sabrinus	Eleutherodactylus sabrinus	Eleutherodactylus sabrinus	Near Threatened (NT)	BZ,GT		5387	https://amphibiaweb.org/species/5387
Anura	Craugastoridae		Craugastor	Craugastor	sagui	Sagui Dirt Frog					PA		9003	https://amphibiaweb.org/species/9003
Anura	Craugastoridae		Craugastor	Craugastor	saltator			Eleutherodactylus saltator	Eleutherodactylus saltator		MX		7300	https://amphibiaweb.org/species/7300
Anura	Craugastoridae		Craugastor	Campbellius	saltuarius		Craugastor saltuarius	Eleutherodactylus saltuarius	Eleutherodactylus saltuarius	Critically Endangered (CR)	HN		5586	https://amphibiaweb.org/species/5586
Anura	Craugastoridae		Craugastor	Craugastor	sandersoni		Craugastor sandersoni	Eleutherodactylus sandersoni	Eleutherodactylus sandersoni	Endangered (EN)	BZ,GT		6158	https://amphibiaweb.org/species/6158
Anura	Craugastoridae		Craugastor	Hylactophryne	silvicola		Craugastor silvicola	Eleutherodactylus silvicola	Eleutherodactylus silvicola	Endangered (EN)	MX		3212	https://amphibiaweb.org/species/3212
Anura	Craugastoridae		Craugastor	Hylactophryne	spatulatus		Craugastor spatulatus	Eleutherodactylus bufonoides, Eleutherodactylus spatulatus	Eleutherodactylus bufonoides, Eleutherodactylus spatulatus	Endangered (EN)	MX		3219	https://amphibiaweb.org/species/3219
Anura	Craugastoridae		Craugastor	Campbellius	stadelmani		Craugastor stadelmani	Eleutherodactylus stadelmani	Eleutherodactylus stadelmani	Critically Endangered (CR)	HN		3222	https://amphibiaweb.org/species/3222
Anura	Craugastoridae		Craugastor	Craugastor	stejnegerianus		Craugastor stejnegerianus	Eleutherodactylus stejnegerianus	Eleutherodactylus stejnegerianus	Least Concern (LC)	PA,CR		3223	https://amphibiaweb.org/species/3223
Anura	Craugastoridae		Craugastor	Hylactophryne	stuarti		Craugastor stuarti	Eleutherodactylus stuarti	Eleutherodactylus stuarti	Endangered (EN)	MX,GT		3226	https://amphibiaweb.org/species/3226
Anura	Craugastoridae		Craugastor	Craugastor	tabasarae		Craugastor tabasarae			Critically Endangered (CR)	PA		6598	https://amphibiaweb.org/species/6598
Anura	Craugastoridae		Craugastor	Craugastor	talamancae	Almirante Robber Frog	Craugastor talamancae	Eleutherodactylus talamancae	Eleutherodactylus talamancae	Least Concern (LC)	NI,CR,PA		3235	https://amphibiaweb.org/species/3235
Anura	Craugastoridae		Craugastor	Hylactophryne	tarahumaraensis		Craugastor tarahumaraensis	Eleutherodactylus tarahumaraensis	Eleutherodactylus tarahumaraensis	Vulnerable (VU)	MX		3237	https://amphibiaweb.org/species/3237
Anura	Craugastoridae		Craugastor	Craugastor	taurus		Craugastor taurus	Eleutherodactylus taurus	Eleutherodactylus taurus	Critically Endangered (CR)	PA,CR		3238	https://amphibiaweb.org/species/3238
Anura	Craugastoridae		Craugastor	Hylactophryne	taylori		Craugastor taylori	Eleutherodactylus taylori	Eleutherodactylus taylori	Data Deficient (DD)	MX		3239	https://amphibiaweb.org/species/3239
Anura	Craugastoridae		Craugastor	Campbellius	trachydermus		Craugastor trachydermus	Eleutherodactylus trachydermus	Eleutherodactylus trachydermus	Critically Endangered (CR)	GT		3252	https://amphibiaweb.org/species/3252
Anura	Craugastoridae		Craugastor	Craugastor	underwoodi	UnderwoodÃ¢â‚¬â„¢s Litter Frog	Craugastor underwoodi	Eleutherodactylus underwoodi	Eleutherodactylus underwoodi	Least Concern (LC)	CR,PA		6607	https://amphibiaweb.org/species/6607
Anura	Craugastoridae		Craugastor	Hylactophryne	uno		Craugastor uno	Eleutherodactylus uno	Eleutherodactylus uno	Endangered (EN)	MX		3259	https://amphibiaweb.org/species/3259
Anura	Craugastoridae		Craugastor	Craugastor	vocalis		Craugastor vocalis	Eleutherodactylus vocalis	Eleutherodactylus vocalis	Least Concern (LC)	MX		3279	https://amphibiaweb.org/species/3279
Anura	Craugastoridae		Craugastor	Craugastor	vulcani		Craugastor vulcani	Eleutherodactylus vulcani	Eleutherodactylus vulcani	Endangered (EN)	MX		6161	https://amphibiaweb.org/species/6161
Anura	Craugastoridae		Craugastor	Hylactophryne	xucanebi		Craugastor xucanebi	Eleutherodactylus xucanebi	Eleutherodactylus xucanebi	Vulnerable (VU)	GT		3289	https://amphibiaweb.org/species/3289
Anura	Craugastoridae		Craugastor	Hylactophryne	yucatanensis		Craugastor yucatanensis	Eleutherodactylus yucatanensis	Eleutherodactylus yucatanensis	Near Threatened (NT)	MX		3291	https://amphibiaweb.org/species/3291
Anura	Craugastoridae		Craugastor	Craugastor	zunigai	Zuniga's Dirt Frog					CR		9004	https://amphibiaweb.org/species/9004
Anura	Craugastoridae		Haddadus		aramunha		Haddadus aramunha			Data Deficient (DD)	BR		7113	https://amphibiaweb.org/species/7113
Anura	Craugastoridae		Haddadus		binotatus		Haddadus binotatus	Eleutherodactylus binotatus	Eleutherodactylus binotatus	Least Concern (LC)	BR		2804	https://amphibiaweb.org/species/2804
Anura	Craugastoridae		Haddadus		plicifer		Haddadus plicifer	Eleutherodactylus plicifer	Eleutherodactylus plicifer	Data Deficient (DD)	BR		3140	https://amphibiaweb.org/species/3140
Anura	Cycloramphidae		Cycloramphus		acangatan		Cycloramphus acangatan			Vulnerable (VU)	BR		6213	https://amphibiaweb.org/species/6213
Anura	Cycloramphidae		Cycloramphus		asper	Werner's Button Frog	Cycloramphus asper	Cycloramphus neglectus	Cycloramphus neglectus	Data Deficient (DD)	BR		2591	https://amphibiaweb.org/species/2591
Anura	Cycloramphidae		Cycloramphus		bandeirensis	Bandeira Button Frog	Cycloramphus bandeirensis			Data Deficient (DD)	BR		2592	https://amphibiaweb.org/species/2592
Anura	Cycloramphidae		Cycloramphus		bolitoglossus	Blumenau Button Frog	Cycloramphus bolitoglossus	Craspedoglossa santaecatharinae, Eupsophus bolitoglossus	Craspedoglossa santaecatharinae, Eupsophus bolitoglossus	Data Deficient (DD)	BR		2593	https://amphibiaweb.org/species/2593
Anura	Cycloramphidae		Cycloramphus		boraceiensis	Boraceia Button Frog	Cycloramphus boraceiensis			Least Concern (LC)	BR		2594	https://amphibiaweb.org/species/2594
Anura	Cycloramphidae		Cycloramphus		brasiliensis	Brazilian Button Frog	Cycloramphus brasiliensis			Near Threatened (NT)	BR		2595	https://amphibiaweb.org/species/2595
Anura	Cycloramphidae		Cycloramphus		carvalhoi	Carvalho's Button Frog	Cycloramphus carvalhoi			Data Deficient (DD)	BR		2596	https://amphibiaweb.org/species/2596
Anura	Cycloramphidae		Cycloramphus		catarinensis	Santa Catarina Button Frog	Cycloramphus catarinensis			Data Deficient (DD)	BR		2597	https://amphibiaweb.org/species/2597
Anura	Cycloramphidae		Cycloramphus		cedrensis	Cedros Button Frog	Cycloramphus cedrensis			Data Deficient (DD)	BR		2598	https://amphibiaweb.org/species/2598
Anura	Cycloramphidae		Cycloramphus		diringshofeni	Sao Bento Button Frog	Cycloramphus diringshofeni			Data Deficient (DD)	BR		2599	https://amphibiaweb.org/species/2599
Anura	Cycloramphidae		Cycloramphus		dubius	Sao Paulo Button Frog	Cycloramphus dubius			Least Concern (LC)	BR		2600	https://amphibiaweb.org/species/2600
Anura	Cycloramphidae		Cycloramphus		duseni	Ypiranga Button Frog	Cycloramphus duseni			Data Deficient (DD)	BR		2601	https://amphibiaweb.org/species/2601
Anura	Cycloramphidae		Cycloramphus		eleutherodactylus	Alto Button Frog	Cycloramphus eleutherodactylus			Data Deficient (DD)	BR		2602	https://amphibiaweb.org/species/2602
Anura	Cycloramphidae		Cycloramphus		faustoi		Cycloramphus faustoi			Critically Endangered (CR)	BR		7041	https://amphibiaweb.org/species/7041
Anura	Cycloramphidae		Cycloramphus		fuliginosus	Tschudi's Button Frog	Cycloramphus fuliginosus	Cycloramphus fulginosus, Cycloramphus umbrinus	Cycloramphus fulginosus, Cycloramphus umbrinus	Least Concern (LC)	BR		2603	https://amphibiaweb.org/species/2603
Anura	Cycloramphidae		Cycloramphus		granulosus	Granular Button Frog	Cycloramphus granulosus			Data Deficient (DD)	BR		2604	https://amphibiaweb.org/species/2604
Anura	Cycloramphidae		Cycloramphus		izecksohni		Cycloramphus izecksohni			Data Deficient (DD)	BR		2605	https://amphibiaweb.org/species/2605
Anura	Cycloramphidae		Cycloramphus		juimirim	Rio Verde Button Frog	Cycloramphus juimirim			Data Deficient (DD)	BR		2607	https://amphibiaweb.org/species/2607
Anura	Cycloramphidae		Cycloramphus		lithomimeticus						BR		7880	https://amphibiaweb.org/species/7880
Anura	Cycloramphidae		Cycloramphus		lutzorum		Cycloramphus lutzorum			Data Deficient (DD)	BR		2608	https://amphibiaweb.org/species/2608
Anura	Cycloramphidae		Cycloramphus		migueli		Cycloramphus migueli			Data Deficient (DD)	BR		2609	https://amphibiaweb.org/species/2609
Anura	Cycloramphidae		Cycloramphus		mirandaribeiroi		Cycloramphus mirandaribeiroi			Data Deficient (DD)	BR		2610	https://amphibiaweb.org/species/2610
Anura	Cycloramphidae		Cycloramphus		ohausi		Cycloramphus ohausi			Data Deficient (DD)	BR		2611	https://amphibiaweb.org/species/2611
Anura	Cycloramphidae		Cycloramphus		organensis		Cycloramphus organensis			Data Deficient (DD)	BR		7614	https://amphibiaweb.org/species/7614
Anura	Cycloramphidae		Cycloramphus		rhyakonastes	Heyer's Button Frog	Cycloramphus rhyakonastes			Least Concern (LC)	BR		2612	https://amphibiaweb.org/species/2612
Anura	Cycloramphidae		Cycloramphus		semipalmatus		Cycloramphus semipalmatus			Near Threatened (NT)	BR		2613	https://amphibiaweb.org/species/2613
Anura	Cycloramphidae		Cycloramphus		stejnegeri	Stejneger's Button Frog	Cycloramphus stejnegeri	Craspedoglossa stejnegeri	Craspedoglossa stejnegeri	Data Deficient (DD)	BR		2614	https://amphibiaweb.org/species/2614
Anura	Cycloramphidae		Cycloramphus		valae	Gruta Button Frog	Cycloramphus valae			Data Deficient (DD)	BR		2615	https://amphibiaweb.org/species/2615
Anura	Cycloramphidae		Thoropa		lutzi		Thoropa lutzi			Endangered (EN)	BR		2733	https://amphibiaweb.org/species/2733
Anura	Cycloramphidae		Thoropa		megatympanum		Thoropa megatympanum			Least Concern (LC)	BR		2734	https://amphibiaweb.org/species/2734
Anura	Cycloramphidae		Thoropa		miliaris		Thoropa miliaris			Least Concern (LC)	BR		2735	https://amphibiaweb.org/species/2735
Anura	Cycloramphidae		Thoropa		petropolitana		Thoropa petropolitana			Vulnerable (VU)	BR		2736	https://amphibiaweb.org/species/2736
Anura	Cycloramphidae		Thoropa		saxatilis		Thoropa saxatilis			Near Threatened (NT)	BR		2737	https://amphibiaweb.org/species/2737
Anura	Cycloramphidae		Thoropa		taophora						BR		7305	https://amphibiaweb.org/species/7305
Anura	Cycloramphidae		Zachaenus		carvalhoi	Carvalho's Bug-eyed Frog	Zachaenus carvalhoi			Near Threatened (NT) - Provisional	BR		2739	https://amphibiaweb.org/species/2739	Guedes, JJM, CL de Assis, CM Novaes, JA Dergam, and RN Feio. 2019. Filling knowledge gaps about the 'Data Deficient' species <i>Zachaenus carvalhoi</i> Izecksohn, 1983 (Anura, Cycloramphidae): an endemic frog from the Atlantic Forest of southeastern Brazil. Herpetology Notes 12:113-204.
Anura	Cycloramphidae		Zachaenus		parvulus	Rio Bug-eyed Frog, Girard's Frog	Zachaenus parvulus			Least Concern (LC)	AR,BR		2740	https://amphibiaweb.org/species/2740	Guedes, JJM, CL de Assis, CM Novaes, JA Dergam, and RN Feio. 2019. Filling knowledge gaps about the 'Data Deficient' species <i>Zachaenus carvalhoi</i> Izecksohn, 1983 (Anura, Cycloramphidae): an endemic frog from the Atlantic Forest of southeastern Brazil. Herpetology Notes 12:113-204.
Anura	Dendrobatidae	Aromobatinae	Allobates		alessandroi		Allobates alessandroi	Colostethus alessandroi	Colostethus alessandroi	Data Deficient (DD)	PE		5993	https://amphibiaweb.org/species/5993
Anura	Dendrobatidae	Aromobatinae	Allobates		algorei	Spotted nurse frog, Sapito niÃƒÆ’Ã‚Â±era moteado	Allobates algorei			Least Concern (LC)	VE		7407	https://amphibiaweb.org/species/7407
Anura	Dendrobatidae	Aromobatinae	Allobates		amissibilis						GY		8098	https://amphibiaweb.org/species/8098
Anura	Dendrobatidae	Aromobatinae	Allobates		bacurau						BR		8449	https://amphibiaweb.org/species/8449
Anura	Dendrobatidae	Aromobatinae	Allobates		bromelicola		Allobates bromelicola	Colostethus bromelicola	Colostethus bromelicola	Data Deficient (DD)	VE		1545	https://amphibiaweb.org/species/1545
Anura	Dendrobatidae	Aromobatinae	Allobates		brunneus		Allobates brunneus	Colostethus brunneus	Colostethus brunneus	Least Concern (LC)	BO,BR,CO,GF,GY,PE,SR		1546	https://amphibiaweb.org/species/1546
Anura	Dendrobatidae	Aromobatinae	Allobates		caeruleodactylus		Allobates caeruleodactylus	Colostethus caeruleodactylus	Colostethus caeruleodactylus	Data Deficient (DD)	BR		5829	https://amphibiaweb.org/species/5829
Anura	Dendrobatidae	Aromobatinae	Allobates		caribe		Allobates caribe			Data Deficient (DD)	VE		6809	https://amphibiaweb.org/species/6809
Anura	Dendrobatidae	Aromobatinae	Allobates		cepedai		Allobates cepedai	Colostethus cepedai	Colostethus cepedai	Data Deficient (DD)	CO		6574	https://amphibiaweb.org/species/6574
Anura	Dendrobatidae	Aromobatinae	Allobates		chalcopis	Martinique Volcano Frog	Allobates chalcopis	Colostethus chalcopis	Colostethus chalcopis	Vulnerable (VU)	MQ		1551	https://amphibiaweb.org/species/1551
Anura	Dendrobatidae	Aromobatinae	Allobates		conspicuus		Allobates conspicuus	Colostethus conspicuus	Colostethus conspicuus	Data Deficient (DD)	BR,PE		6309	https://amphibiaweb.org/species/6309
Anura	Dendrobatidae	Aromobatinae	Allobates		crombiei		Allobates crombiei	Colostethus crombiei	Colostethus crombiei	Data Deficient (DD)	BR		6310	https://amphibiaweb.org/species/6310
Anura	Dendrobatidae	Aromobatinae	Allobates		femoralis		Allobates femoralis			Least Concern (LC)	SR,PE,GY,GF,EC,CO,BR		1661	https://amphibiaweb.org/species/1661
Anura	Dendrobatidae	Aromobatinae	Allobates		flaviventris	Yellow-bellied stream frog, Razinha riparia de barriga amarela, Rana de quebrada de barriga amarilla					BO,BR		8072	https://amphibiaweb.org/species/8072
Anura	Dendrobatidae	Aromobatinae	Allobates		fratisenescus		Allobates fratisenescus	Colostethus fratisenescus	Colostethus fratisenescus	Data Deficient (DD)	EC		6575	https://amphibiaweb.org/species/6575
Anura	Dendrobatidae	Aromobatinae	Allobates		fuscellus		Allobates fuscellus	Colostethus fuscellus	Colostethus fuscellus	Data Deficient (DD)	BR,PE		6311	https://amphibiaweb.org/species/6311
Anura	Dendrobatidae	Aromobatinae	Allobates		gasconi		Allobates gasconi	Colostethus gasconi	Colostethus gasconi	Data Deficient (DD)	BR		6312	https://amphibiaweb.org/species/6312
Anura	Dendrobatidae	Aromobatinae	Allobates		goianus		Allobates goianus	Colostethus goianus	Colostethus goianus	Data Deficient (DD)	BR		1567	https://amphibiaweb.org/species/1567
Anura	Dendrobatidae	Aromobatinae	Allobates		granti		Allobates granti			Least Concern (LC)	GF		6810	https://amphibiaweb.org/species/6810
Anura	Dendrobatidae	Aromobatinae	Allobates		grillisimilis						BR		7968	https://amphibiaweb.org/species/7968
Anura	Dendrobatidae	Aromobatinae	Allobates		hodli						BR		7471	https://amphibiaweb.org/species/7471
Anura	Dendrobatidae	Aromobatinae	Allobates		humilis		Allobates humilis	Colostethus humilis	Colostethus humilis	Vulnerable (VU)	VE		1568	https://amphibiaweb.org/species/1568
Anura	Dendrobatidae	Aromobatinae	Allobates		ignotus	Nurse frog of the SerranÃƒÂ­a de PerijÃƒÂ¡, Rana nodriza de la SerranÃƒÂ­a de PerijÃƒÂ¡	Allobates ignotus			Endangered (EN)	CO		7824	https://amphibiaweb.org/species/7824
Anura	Dendrobatidae	Aromobatinae	Allobates		insperatus		Allobates insperatus	Colostethus insperatus	Colostethus insperatus	Least Concern (LC)	EC,PE		6576	https://amphibiaweb.org/species/6576
Anura	Dendrobatidae	Aromobatinae	Allobates		juami						BR		8785	https://amphibiaweb.org/species/8785
Anura	Dendrobatidae	Aromobatinae	Allobates		juanii		Allobates juanii	Colostethus juanii	Colostethus juanii	Critically Endangered (CR)	CO		1574	https://amphibiaweb.org/species/1574
Anura	Dendrobatidae	Aromobatinae	Allobates		kingsburyi		Allobates kingsburyi	Colostethus kingsburyi	Colostethus kingsburyi	Endangered (EN)	EC		1575	https://amphibiaweb.org/species/1575
Anura	Dendrobatidae	Aromobatinae	Allobates		magnussoni						BR		8262	https://amphibiaweb.org/species/8262
Anura	Dendrobatidae	Aromobatinae	Allobates		mandelorum		Allobates mandelorum	Colostethus mandelorum	Colostethus mandelorum	Endangered (EN)	VE		1582	https://amphibiaweb.org/species/1582
Anura	Dendrobatidae	Aromobatinae	Allobates		marchesianus		Allobates marchesianus	Colostethus marchesianus	Colostethus marchesianus	Least Concern (LC)	PE,EC,CO,BR		1584	https://amphibiaweb.org/species/1584
Anura	Dendrobatidae	Aromobatinae	Allobates		masniger		Allobates masniger	Colostethus masniger	Colostethus masniger	Data Deficient (DD)	BR		6313	https://amphibiaweb.org/species/6313
Anura	Dendrobatidae	Aromobatinae	Allobates		mcdiarmidi		Allobates mcdiarmidi	Colostethus mcdiarmidi	Colostethus mcdiarmidi	Near Threatened (NT)	BO		1586	https://amphibiaweb.org/species/1586
Anura	Dendrobatidae	Aromobatinae	Allobates		melanolaemus		Allobates melanolaemus	Colostethus melanolaemus	Colostethus melanolaemus	Data Deficient (DD)	PE		5992	https://amphibiaweb.org/species/5992
Anura	Dendrobatidae	Aromobatinae	Allobates		myersi	Myers' Poison Frog	Allobates myersi	Epipedobates myersi	Epipedobates myersi	Least Concern (LC)	CO,PE		1667	https://amphibiaweb.org/species/1667
Anura	Dendrobatidae	Aromobatinae	Allobates		nidicola		Allobates nidicola	Colostethus nidicola	Colostethus nidicola	Data Deficient (DD)	BR		6097	https://amphibiaweb.org/species/6097
Anura	Dendrobatidae	Aromobatinae	Allobates		niputidea		Allobates niputidea			Least Concern (LC)	CO		7074	https://amphibiaweb.org/species/7074
Anura	Dendrobatidae	Aromobatinae	Allobates		nunciatus						BR		9052	https://amphibiaweb.org/species/9052
Anura	Dendrobatidae	Aromobatinae	Allobates		olfersioides		Allobates olfersioides	Colostethus alagoanus, Colostethus capixaba, Colostethus carioca	Colostethus alagoanus, Colostethus capixaba, Colostethus carioca	Vulnerable (VU)	BR		1592	https://amphibiaweb.org/species/1592
Anura	Dendrobatidae	Aromobatinae	Allobates		ornatus		Allobates ornatus	Colostethus ornatus	Colostethus ornatus	Data Deficient (DD)	PE		6360	https://amphibiaweb.org/species/6360
Anura	Dendrobatidae	Aromobatinae	Allobates		pacaas						BR		9168	https://amphibiaweb.org/species/9168
Anura	Dendrobatidae	Aromobatinae	Allobates		paleovarzensis		Allobates paleovarzensis			Near Threatened (NT)	BR		7414	https://amphibiaweb.org/species/7414
Anura	Dendrobatidae	Aromobatinae	Allobates		picachos		Allobates picachos	Colostethus picacho, Colostethus picachos	Colostethus picacho, Colostethus picachos	Data Deficient (DD)	CO		6113	https://amphibiaweb.org/species/6113
Anura	Dendrobatidae	Aromobatinae	Allobates		pittieri	aurea	Allobates pittieri			Least Concern (LC)	VE		6783	https://amphibiaweb.org/species/6783
Anura	Dendrobatidae	Aromobatinae	Allobates		ranoides		Allobates ranoides	Colostethus ranoides	Colostethus ranoides	Endangered (EN)	CO		1603	https://amphibiaweb.org/species/1603
Anura	Dendrobatidae	Aromobatinae	Allobates		sanmartini		Allobates sanmartini	Colostethus sanmartini	Colostethus sanmartini	Data Deficient (DD)	VE		1606	https://amphibiaweb.org/species/1606
Anura	Dendrobatidae	Aromobatinae	Allobates		subfolionidificans		Allobates subfolionidificans			Vulnerable (VU)	BR		6900	https://amphibiaweb.org/species/6900
Anura	Dendrobatidae	Aromobatinae	Allobates		sumtuosus		Allobates sumtuosus	Allobates spumaponens, Colostethus sumtuosus	Colostethus sumtuosus	Data Deficient (DD)	BR,PE,SR		6314	https://amphibiaweb.org/species/6314
Anura	Dendrobatidae	Aromobatinae	Allobates		talamancae	Striped Rocket Frog	Allobates talamancae	Colostethus talamancae	Colostethus talamancae	Least Concern (LC)	CO,CR,EC,PA		1614	https://amphibiaweb.org/species/1614
Anura	Dendrobatidae	Aromobatinae	Allobates		tapajos						BR		8353	https://amphibiaweb.org/species/8353
Anura	Dendrobatidae	Aromobatinae	Allobates		tinae						BR		8880	https://amphibiaweb.org/species/8880
Anura	Dendrobatidae	Aromobatinae	Allobates		trilineatus		Allobates trilineatus	Colostethus trilineatus	Colostethus trilineatus	Least Concern (LC)	BR,CO,EC,PE		1617	https://amphibiaweb.org/species/1617
Anura	Dendrobatidae	Aromobatinae	Allobates		undulatus		Allobates undulatus	Colostethus undulatus	Colostethus undulatus	Data Deficient (DD)			6116	https://amphibiaweb.org/species/6116
Anura	Dendrobatidae	Aromobatinae	Allobates		vanzolinius		Allobates vanzolinius	Colostethus vanzolinius	Colostethus vanzolinius	Data Deficient (DD)	BR		6315	https://amphibiaweb.org/species/6315
Anura	Dendrobatidae	Aromobatinae	Allobates		wayuu		Allobates wayuu	Colostethus wayuu	Colostethus wayuu	Least Concern (LC)	CO		6577	https://amphibiaweb.org/species/6577
Anura	Dendrobatidae	Aromobatinae	Allobates		zaparo	Sanguine Poison-arrow Frog, Sanguine Poison Frog, ZaparoÃ¢â‚¬â„¢s Poison Frog, Rana Venenosa (Spanish)	Allobates zaparo			Least Concern (LC)	PE,EC		1676	https://amphibiaweb.org/species/1676
Anura	Dendrobatidae	Aromobatinae	Anomaloglossus		apiau						BR		8310	https://amphibiaweb.org/species/8310
Anura	Dendrobatidae	Aromobatinae	Anomaloglossus		ayarzaguenai		Anomaloglossus ayarzaguenai	Colostethus ayarzaguenai	Colostethus ayarzaguenai	Data Deficient (DD)	VE		5569	https://amphibiaweb.org/species/5569
Anura	Dendrobatidae	Aromobatinae	Anomaloglossus		baeobatrachus		Anomaloglossus baeobatrachus			Data Deficient (DD)	GF		6825	https://amphibiaweb.org/species/6825
Anura	Dendrobatidae	Aromobatinae	Anomaloglossus		beebei		Anomaloglossus beebei	Colostethus beebei	Colostethus beebei	Vulnerable (VU)	BR,GY		1540	https://amphibiaweb.org/species/1540
Anura	Dendrobatidae	Aromobatinae	Anomaloglossus		blanci						GF		8773	https://amphibiaweb.org/species/8773
Anura	Dendrobatidae	Aromobatinae	Anomaloglossus		breweri		Anomaloglossus breweri			Vulnerable (VU)	VE		6695	https://amphibiaweb.org/species/6695
Anura	Dendrobatidae	Aromobatinae	Anomaloglossus		degranvillei		Anomaloglossus degranvillei	Colostethus degranvillei	Colostethus degranvillei	Least Concern (LC)	SR,GF		1553	https://amphibiaweb.org/species/1553
Anura	Dendrobatidae	Aromobatinae	Anomaloglossus		dewynteri						GF		8774	https://amphibiaweb.org/species/8774
Anura	Dendrobatidae	Aromobatinae	Anomaloglossus		guanayensis		Anomaloglossus guanayensis	Colostethus guanayensis	Colostethus guanayensis	Data Deficient (DD)	VE		5570	https://amphibiaweb.org/species/5570
Anura	Dendrobatidae	Aromobatinae	Anomaloglossus		kaiei		Anomaloglossus kaiei			Least Concern (LC)	GY		6757	https://amphibiaweb.org/species/6757
Anura	Dendrobatidae	Aromobatinae	Anomaloglossus		leopardus	Leopard Rocket Frog, luipaard dwerggifkikker					SR		7841	https://amphibiaweb.org/species/7841
Anura	Dendrobatidae	Aromobatinae	Anomaloglossus		meansi						GY		8852	https://amphibiaweb.org/species/8852
Anura	Dendrobatidae	Aromobatinae	Anomaloglossus		mitaraka						GF		8994	https://amphibiaweb.org/species/8994
Anura	Dendrobatidae	Aromobatinae	Anomaloglossus		moffetti	Sarisarinama Rocket Frog, Sapito ninera de Sarisarinama					VE		7217	https://amphibiaweb.org/species/7217
Anura	Dendrobatidae	Aromobatinae	Anomaloglossus		murisipanensis		Anomaloglossus murisipanensis	Colostethus murisipanensis	Colostethus murisipanensis	Vulnerable (VU)	VE		5571	https://amphibiaweb.org/species/5571
Anura	Dendrobatidae	Aromobatinae	Anomaloglossus		parimae		Anomaloglossus parimae	Colostethus parimae	Colostethus parimae	Data Deficient (DD)	VE		5572	https://amphibiaweb.org/species/5572
Anura	Dendrobatidae	Aromobatinae	Anomaloglossus		parkerae		Anomaloglossus parkerae	Colostethus parkerae	Colostethus parkerae	Data Deficient (DD)	VE		1594	https://amphibiaweb.org/species/1594
Anura	Dendrobatidae	Aromobatinae	Anomaloglossus		praderioi		Anomaloglossus praderioi	Colostethus praderioi	Colostethus praderioi	Data Deficient (DD)	GY,VE		5573	https://amphibiaweb.org/species/5573
Anura	Dendrobatidae	Aromobatinae	Anomaloglossus		roraima	Roraima rocket frog proposed	Anomaloglossus roraima	Colostethus roraima	Colostethus roraima	Data Deficient (DD)	VE		5574	https://amphibiaweb.org/species/5574
Anura	Dendrobatidae	Aromobatinae	Anomaloglossus		rufulus		Anomaloglossus rufulus	Epipedobates rufulus	Epipedobates rufulus	Data Deficient (DD)	VE		1644	https://amphibiaweb.org/species/1644
Anura	Dendrobatidae	Aromobatinae	Anomaloglossus		saramaka						SR		9240	https://amphibiaweb.org/species/9240
Anura	Dendrobatidae	Aromobatinae	Anomaloglossus		shrevei		Anomaloglossus shrevei	Colostethus shrevei	Colostethus shrevei	Data Deficient (DD)	VE		1609	https://amphibiaweb.org/species/1609
Anura	Dendrobatidae	Aromobatinae	Anomaloglossus		stepheni		Anomaloglossus stepheni	Colostethus stepheni	Colostethus stepheni	Least Concern (LC)	BR,SR		1611	https://amphibiaweb.org/species/1611
Anura	Dendrobatidae	Aromobatinae	Anomaloglossus		surinamensis	Suriname Rocket Frog, Surinaamse dwerggifkikker					SR		7840	https://amphibiaweb.org/species/7840
Anura	Dendrobatidae	Aromobatinae	Anomaloglossus		tamacuarensis		Anomaloglossus tamacuarensis	Colostethus tamacuarensis	Colostethus tamacuarensis	Data Deficient (DD)	BR,VE		5576	https://amphibiaweb.org/species/5576
Anura	Dendrobatidae	Aromobatinae	Anomaloglossus		tepequem						BR		8309	https://amphibiaweb.org/species/8309
Anura	Dendrobatidae	Aromobatinae	Anomaloglossus		tepuyensis		Anomaloglossus tepuyensis	Colostethus tepuyensis	Colostethus tepuyensis	Data Deficient (DD)	VE		5577	https://amphibiaweb.org/species/5577
Anura	Dendrobatidae	Aromobatinae	Anomaloglossus		triunfo		Anomaloglossus triunfo			Data Deficient (DD)	VE		6425	https://amphibiaweb.org/species/6425
Anura	Dendrobatidae	Aromobatinae	Anomaloglossus		vacheri						SR		9241	https://amphibiaweb.org/species/9241
Anura	Dendrobatidae	Aromobatinae	Anomaloglossus		verbeeksnyderorum						VE		7480	https://amphibiaweb.org/species/7480
Anura	Dendrobatidae	Aromobatinae	Anomaloglossus		wothuja		Anomaloglossus wothuja			Data Deficient (DD)	VE		6426	https://amphibiaweb.org/species/6426
Anura	Dendrobatidae	Aromobatinae	Aromobates		alboguttatus		Aromobates alboguttatus	Nephelobates alboguttatus	Nephelobates alboguttatus	Endangered (EN)	VE		1697	https://amphibiaweb.org/species/1697
Anura	Dendrobatidae	Aromobatinae	Aromobates		cannatellai						VE		7882	https://amphibiaweb.org/species/7882
Anura	Dendrobatidae	Aromobatinae	Aromobates		capurinensis		Aromobates capurinensis	Colostethus capurinensis	Colostethus capurinensis	Data Deficient (DD)	VE		1547	https://amphibiaweb.org/species/1547
Anura	Dendrobatidae	Aromobatinae	Aromobates		duranti		Aromobates duranti	Nephelobates duranti	Nephelobates duranti	Endangered (EN)	VE		1556	https://amphibiaweb.org/species/1556
Anura	Dendrobatidae	Aromobatinae	Aromobates		ericksonae						VE		7883	https://amphibiaweb.org/species/7883
Anura	Dendrobatidae	Aromobatinae	Aromobates		haydeeae		Aromobates haydeeae	Nephelobates haydeeae	Nephelobates haydeeae	Endangered (EN)	VE		1698	https://amphibiaweb.org/species/1698
Anura	Dendrobatidae	Aromobatinae	Aromobates		inflexus						VE		7885	https://amphibiaweb.org/species/7885
Anura	Dendrobatidae	Aromobatinae	Aromobates		leopardalis		Aromobates leopardalis	Colostethus leopardalis	Colostethus leopardalis	Critically Endangered (CR)	VE		1579	https://amphibiaweb.org/species/1579
Anura	Dendrobatidae	Aromobatinae	Aromobates		mayorgai		Aromobates mayorgai	Nephelobates mayorgai	Nephelobates mayorgai	Endangered (EN)	VE		1699	https://amphibiaweb.org/species/1699
Anura	Dendrobatidae	Aromobatinae	Aromobates		meridensis		Aromobates meridensis	Nephelobates meridensis	Nephelobates meridensis	Critically Endangered (CR)	VE		1700	https://amphibiaweb.org/species/1700
Anura	Dendrobatidae	Aromobatinae	Aromobates		molinarii		Aromobates molinarii	Nephelobates molinarii	Nephelobates molinarii	Endangered (EN)	VE		1701	https://amphibiaweb.org/species/1701
Anura	Dendrobatidae	Aromobatinae	Aromobates		nocturnus	Venezuelean Skunk Frog	Aromobates nocturnus			Critically Endangered (CR)	VE		1531	https://amphibiaweb.org/species/1531
Anura	Dendrobatidae	Aromobatinae	Aromobates		ornatissimus	Ornate cloud frog, Sapito de niebla adornado					VE		7730	https://amphibiaweb.org/species/7730
Anura	Dendrobatidae	Aromobatinae	Aromobates		orostoma		Aromobates orostoma	Nephelobates orostoma	Nephelobates orostoma	Endangered (EN)	VE		1702	https://amphibiaweb.org/species/1702
Anura	Dendrobatidae	Aromobatinae	Aromobates		saltuensis		Aromobates saltuensis	Colostethus saltuensis	Colostethus saltuensis	Endangered (EN)	VE		1605	https://amphibiaweb.org/species/1605
Anura	Dendrobatidae	Aromobatinae	Aromobates		serranus		Aromobates serranus	Nephelobates serranus	Nephelobates serranus	Endangered (EN)	VE		1608	https://amphibiaweb.org/species/1608
Anura	Dendrobatidae	Aromobatinae	Aromobates		tokuko	Perija's Nurse Frog; Sapito NiÃƒÂ±era de PerijÃƒÂ¡					VE		7692	https://amphibiaweb.org/species/7692
Anura	Dendrobatidae	Aromobatinae	Aromobates		walterarpi						VE		7854	https://amphibiaweb.org/species/7854
Anura	Dendrobatidae	Aromobatinae	Aromobates		zippeli						VE		7884	https://amphibiaweb.org/species/7884
Anura	Dendrobatidae	Aromobatinae	Mannophryne		caquetio		Mannophryne caquetio			Critically Endangered (CR)	VE		5526	https://amphibiaweb.org/species/5526
Anura	Dendrobatidae	Aromobatinae	Mannophryne		collaris		Mannophryne collaris			Endangered (EN)	VE		1678	https://amphibiaweb.org/species/1678
Anura	Dendrobatidae	Aromobatinae	Mannophryne		cordilleriana		Mannophryne cordilleriana			Critically Endangered (CR)	VE		5580	https://amphibiaweb.org/species/5580
Anura	Dendrobatidae	Aromobatinae	Mannophryne		herminae		Mannophryne herminae			Near Threatened (NT)	VE		1679	https://amphibiaweb.org/species/1679
Anura	Dendrobatidae	Aromobatinae	Mannophryne		lamarcai		Mannophryne lamarcai			Critically Endangered (CR)	VE		5480	https://amphibiaweb.org/species/5480
Anura	Dendrobatidae	Aromobatinae	Mannophryne		larandina		Mannophryne larandina			Data Deficient (DD)			6118	https://amphibiaweb.org/species/6118
Anura	Dendrobatidae	Aromobatinae	Mannophryne		leonardoi		Mannophryne leonardoi			Endangered (EN)	VE		6925	https://amphibiaweb.org/species/6925
Anura	Dendrobatidae	Aromobatinae	Mannophryne		molinai	Sierra de Aroa Collared Frog; sapito acollarado de la Sierra de Aroa					VE		8899	https://amphibiaweb.org/species/8899
Anura	Dendrobatidae	Aromobatinae	Mannophryne		neblina		Mannophryne neblina			Critically Endangered (CR)	VE		1680	https://amphibiaweb.org/species/1680
Anura	Dendrobatidae	Aromobatinae	Mannophryne		oblitterata		Mannophryne oblitterata			Data Deficient (DD)	VE		1681	https://amphibiaweb.org/species/1681
Anura	Dendrobatidae	Aromobatinae	Mannophryne		olmonae	Tobagp Poison Frog, Bloody Bay Poison Frog, Bloody Bay Stream Frog, Tobago Stream Frog	Mannophryne olmonae	Colostethus olmonae	Colostethus olmonae	Vulnerable (VU)	TT		1682	https://amphibiaweb.org/species/1682
Anura	Dendrobatidae	Aromobatinae	Mannophryne		orellana						VE		7519	https://amphibiaweb.org/species/7519
Anura	Dendrobatidae	Aromobatinae	Mannophryne		riveroi		Mannophryne riveroi			Endangered (EN)	VE		1683	https://amphibiaweb.org/species/1683
Anura	Dendrobatidae	Aromobatinae	Mannophryne		speeri		Mannophryne speeri			Data Deficient (DD)	VE		7359	https://amphibiaweb.org/species/7359
Anura	Dendrobatidae	Aromobatinae	Mannophryne		trinitatis	Trinidad Poison Frog	Mannophryne trinitatis			Vulnerable (VU)	TT		1684	https://amphibiaweb.org/species/1684
Anura	Dendrobatidae	Aromobatinae	Mannophryne		trujillensis		Mannophryne trujillensis			Endangered (EN)	VE		6989	https://amphibiaweb.org/species/6989
Anura	Dendrobatidae	Aromobatinae	Mannophryne		urticans						VE		7520	https://amphibiaweb.org/species/7520
Anura	Dendrobatidae	Aromobatinae	Mannophryne		venezuelensis		Mannophryne venezuelensis			Near Threatened (NT)	VE		6990	https://amphibiaweb.org/species/6990
Anura	Dendrobatidae	Aromobatinae	Mannophryne		vulcano						VE		7521	https://amphibiaweb.org/species/7521
Anura	Dendrobatidae	Aromobatinae	Mannophryne		yustizi		Mannophryne yustizi			Endangered (EN)	VE		1685	https://amphibiaweb.org/species/1685
Anura	Dendrobatidae	Aromobatinae	Rheobates		palmatus		Rheobates palmatus	Colostethus palmatus	Colostethus palmatus	Least Concern (LC)	CO		1593	https://amphibiaweb.org/species/1593
Anura	Dendrobatidae	Aromobatinae	Rheobates		pseudopalmatus		Rheobates pseudopalmatus	Colostethus pseudopalmatus	Colostethus pseudopalmatus	Data Deficient (DD)	CO		6114	https://amphibiaweb.org/species/6114
Anura	Dendrobatidae	Colostethinae	Ameerega		altamazonica	Tarapoto Poison Frog					PE		7108	https://amphibiaweb.org/species/7108
Anura	Dendrobatidae	Colostethinae	Ameerega		andina		Ameerega andina	Epipedobates andinus, Dendrobates andinus, Paruwrobates andinus	Epipedobates andinus	Data Deficient (DD)	CO		1651	https://amphibiaweb.org/species/1651
Anura	Dendrobatidae	Colostethinae	Ameerega		bassleri		Ameerega bassleri	Epipedobates bassleri	Epipedobates bassleri	Near Threatened (NT)	PE		1653	https://amphibiaweb.org/species/1653
Anura	Dendrobatidae	Colostethinae	Ameerega		berohoka		Ameerega berohoka			Least Concern (LC)	BR		7643	https://amphibiaweb.org/species/7643
Anura	Dendrobatidae	Colostethinae	Ameerega		bilinguis		Ameerega bilinguis	Epipedobates bilinguis	Epipedobates bilinguis	Least Concern (LC)	CO,EC,PE		1654	https://amphibiaweb.org/species/1654
Anura	Dendrobatidae	Colostethinae	Ameerega		boehmei		Ameerega boehmei			Least Concern (LC)	BO		8507	https://amphibiaweb.org/species/8507
Anura	Dendrobatidae	Colostethinae	Ameerega		boliviana		Ameerega boliviana	Epipedobates bolivianus	Epipedobates bolivianus	Least Concern (LC)	BO		1655	https://amphibiaweb.org/species/1655
Anura	Dendrobatidae	Colostethinae	Ameerega		braccata		Ameerega braccata	Epipedobates braccatus	Epipedobates braccatus	Least Concern (LC)	BR		1657	https://amphibiaweb.org/species/1657
Anura	Dendrobatidae	Colostethinae	Ameerega		cainarachi		Ameerega cainarachi	Epipedobates cainarachi	Epipedobates cainarachi	Vulnerable (VU)	PE		1658	https://amphibiaweb.org/species/1658
Anura	Dendrobatidae	Colostethinae	Ameerega		erythromos		Ameerega erythromos	Epipedobates erythromos	Epipedobates erythromos	Data Deficient (DD)	EC		1659	https://amphibiaweb.org/species/1659
Anura	Dendrobatidae	Colostethinae	Ameerega		flavopicta		Ameerega flavopicta	Epipedobates flavopictus	Epipedobates flavopictus	Least Concern (LC)	BR		1662	https://amphibiaweb.org/species/1662
Anura	Dendrobatidae	Colostethinae	Ameerega		hahneli		Ameerega hahneli	Epipedobates hahneli	Epipedobates hahneli	Least Concern (LC)	BO,BR,CO,EC,PE,SR		1663	https://amphibiaweb.org/species/1663
Anura	Dendrobatidae	Colostethinae	Ameerega		ignipedis		Ameerega ignipedis			Least Concern (LC)	PE		7275	https://amphibiaweb.org/species/7275
Anura	Dendrobatidae	Colostethinae	Ameerega		imasmari	Riddle poison frog					PE		9116	https://amphibiaweb.org/species/9116
Anura	Dendrobatidae	Colostethinae	Ameerega		ingeri		Ameerega ingeri	Epipedobates ingeri	Epipedobates ingeri	Data Deficient (DD)	CO		1664	https://amphibiaweb.org/species/1664
Anura	Dendrobatidae	Colostethinae	Ameerega		labialis		Ameerega labialis	Epipedobates labialis	Epipedobates labialis	Data Deficient (DD)	PE		1635	https://amphibiaweb.org/species/1635
Anura	Dendrobatidae	Colostethinae	Ameerega		macero		Ameerega macero	Epipedobates macero	Epipedobates macero	Least Concern (LC)	BR,PE		1665	https://amphibiaweb.org/species/1665
Anura	Dendrobatidae	Colostethinae	Ameerega		maculata	Confusing Poison Frog	Ameerega maculata	Epipedobates maculatus	Epipedobates maculatus	Data Deficient (DD)	PA		1666	https://amphibiaweb.org/species/1666
Anura	Dendrobatidae	Colostethinae	Ameerega		munduruku						BR		8769	https://amphibiaweb.org/species/8769
Anura	Dendrobatidae	Colostethinae	Ameerega		panguana	Panguana poison frog					PE		9115	https://amphibiaweb.org/species/9115
Anura	Dendrobatidae	Colostethinae	Ameerega		parvula	Ruby Poison Frog, Rana Venenosa	Ameerega parvula	Epipedobates parvulus	Epipedobates parvulus	Least Concern (LC)	PE,EC,CO		1668	https://amphibiaweb.org/species/1668
Anura	Dendrobatidae	Colostethinae	Ameerega		pepperi						PE		7276	https://amphibiaweb.org/species/7276
Anura	Dendrobatidae	Colostethinae	Ameerega		peruviridis						PE		6995	https://amphibiaweb.org/species/6995	This taxon is of dubious status (nomen dubitum).
Anura	Dendrobatidae	Colostethinae	Ameerega		petersi		Ameerega petersi	Ameerega smaragdina, Epipedobates petersi	Epipedobates petersi	Least Concern (LC)	BR,PE		1669	https://amphibiaweb.org/species/1669
Anura	Dendrobatidae	Colostethinae	Ameerega		picta		Ameerega picta	Epipedobates pictus	Epipedobates pictus	Least Concern (LC)	VE,SR,PE,PY,GY,GF,EC,CO,BR,BO		1670	https://amphibiaweb.org/species/1670	A subspecies, guayanensis, has been recorded from Brazil, and the authors of the account suggest that it be raised to full species level (Avila-Pires et al. 2010 Bol. Mus. Para. Emilio Goeldi)
Anura	Dendrobatidae	Colostethinae	Ameerega		planipaleae		Ameerega planipaleae	Epipedobates planipaleae	Epipedobates planipaleae	Critically Endangered (CR)	PE		5455	https://amphibiaweb.org/species/5455
Anura	Dendrobatidae	Colostethinae	Ameerega		pongoensis		Ameerega pongoensis	Epipedobates pongoensis	Epipedobates pongoensis	Vulnerable (VU)	PE		5915	https://amphibiaweb.org/species/5915
Anura	Dendrobatidae	Colostethinae	Ameerega		pulchripecta		Ameerega pulchripecta	Epipedobates pulchripectus	Epipedobates pulchripectus	Data Deficient (DD)	BR		1671	https://amphibiaweb.org/species/1671
Anura	Dendrobatidae	Colostethinae	Ameerega		rubriventris		Ameerega rubriventris	Epipedobates rubriventris	Epipedobates rubriventris	Data Deficient (DD)	PE		5579	https://amphibiaweb.org/species/5579
Anura	Dendrobatidae	Colostethinae	Ameerega		shihuemoy		Ameerega shihuemoy			Endangered (EN)	PE		8569	https://amphibiaweb.org/species/8569
Anura	Dendrobatidae	Colostethinae	Ameerega		silverstonei	Silverstone's Poison Frog, Rana Venenosa	Ameerega silverstonei	Epipedobates silverstonei	Epipedobates silverstonei	Endangered (EN)	PE		1672	https://amphibiaweb.org/species/1672
Anura	Dendrobatidae	Colostethinae	Ameerega		simulans		Ameerega simulans	Epipedobates simulans	Epipedobates simulans	Least Concern (LC)	PE		5456	https://amphibiaweb.org/species/5456
Anura	Dendrobatidae	Colostethinae	Ameerega		trivittata	Three-striped Poison Frog (English), groengestreepte gifkikker (Dutch), tidetide (Sranan), Sapito Dargo Trillistado (Spanish)	Ameerega trivittata	Epipedobates trivittatus	Epipedobates trivittatus	Least Concern (LC)	BO,BR,CO,EC,GF,GY,PE,SR,VE		1675	https://amphibiaweb.org/species/1675
Anura	Dendrobatidae	Colostethinae	Ameerega		yoshina					Near Threatened (NT) - Provisional	PE		7277	https://amphibiaweb.org/species/7277
Anura	Dendrobatidae	Colostethinae	Ameerega		yungicola		Ameerega yungicola			Least Concern (LC)	BO		6741	https://amphibiaweb.org/species/6741
Anura	Dendrobatidae	Colostethinae	Colostethus		agilis		Colostethus agilis			Endangered (EN)	CO		1534	https://amphibiaweb.org/species/1534
Anura	Dendrobatidae	Colostethinae	Colostethus		alacris		Colostethus alacris			Data Deficient (DD)	CO		1535	https://amphibiaweb.org/species/1535
Anura	Dendrobatidae	Colostethinae	Colostethus		brachistriatus		Colostethus brachistriatus			Data Deficient (DD)	CO		1543	https://amphibiaweb.org/species/1543
Anura	Dendrobatidae	Colostethinae	Colostethus		dunni		Prostherapis dunni	Prostherapis dunni	Prostherapis dunni	Critically Endangered (CR)	VE		1555	https://amphibiaweb.org/species/1555
Anura	Dendrobatidae	Colostethinae	Colostethus		dysprosium		Colostethus dysprosium			Data Deficient (DD)	CO		6110	https://amphibiaweb.org/species/6110
Anura	Dendrobatidae	Colostethinae	Colostethus		fraterdanieli		Colostethus fraterdanieli			Least Concern (LC)	CO		1563	https://amphibiaweb.org/species/1563
Anura	Dendrobatidae	Colostethinae	Colostethus		furviventris		Colostethus furviventris			Data Deficient (DD)	CO		1566	https://amphibiaweb.org/species/1566
Anura	Dendrobatidae	Colostethinae	Colostethus		imbricolus		Colostethus imbricolus			Data Deficient (DD)	CO		1570	https://amphibiaweb.org/species/1570
Anura	Dendrobatidae	Colostethinae	Colostethus		inguinalis		Colostethus inguinalis			Least Concern (LC)	CO		1572	https://amphibiaweb.org/species/1572
Anura	Dendrobatidae	Colostethinae	Colostethus		latinasus		Colostethus latinasus			Data Deficient (DD)	PA,CO		1577	https://amphibiaweb.org/species/1577
Anura	Dendrobatidae	Colostethinae	Colostethus		lynchi		Colostethus lynchi			Data Deficient (DD)	CO		5425	https://amphibiaweb.org/species/5425
Anura	Dendrobatidae	Colostethinae	Colostethus		mertensi		Colostethus mertensi			Vulnerable (VU)	CO		1587	https://amphibiaweb.org/species/1587
Anura	Dendrobatidae	Colostethinae	Colostethus		panamensis	Panama rocket frog	Colostethus panamansis	Colostethus panamansis	Colostethus panamensis	Least Concern (LC)	CO,PA		6424	https://amphibiaweb.org/species/6424	Grant, T., D. R. Frost, R. IbÃƒÂ¡ÃƒÂ±ez D., C. W. Myers, and J. M. Savage. 2006 Bulletin of Zoological Nomenclature 63: 39Ã¢â‚¬â€œ41 proposed corrected spelling from panamansis.
Anura	Dendrobatidae	Colostethinae	Colostethus		poecilonotus		Colostethus poecilonotus			Data Deficient (DD)	PE		1598	https://amphibiaweb.org/species/1598
Anura	Dendrobatidae	Colostethinae	Colostethus		pratti		Colostethus pratti			Least Concern (LC)	CO,PA		1599	https://amphibiaweb.org/species/1599
Anura	Dendrobatidae	Colostethinae	Colostethus		ramirezi		Colostethus ramirezi			Data Deficient (DD)	CO		6115	https://amphibiaweb.org/species/6115
Anura	Dendrobatidae	Colostethinae	Colostethus		ruthveni		Colostethus ruthveni			Endangered (EN)	CO		5575	https://amphibiaweb.org/species/5575
Anura	Dendrobatidae	Colostethinae	Colostethus		thorntoni		Colostethus thorntoni			Data Deficient (DD)	CO		1616	https://amphibiaweb.org/species/1616
Anura	Dendrobatidae	Colostethinae	Colostethus		ucumari		Colostethus ucumari			Endangered (EN)	CO		6984	https://amphibiaweb.org/species/6984
Anura	Dendrobatidae	Colostethinae	Colostethus		yaguara		Colostethus yaguara			Data Deficient (DD)	CO		1622	https://amphibiaweb.org/species/1622
Anura	Dendrobatidae	Colostethinae	Epipedobates		anthonyi	Anthony's Poison Arrow Frog	Epipedobates anthonyi			Near Threatened (NT)	EC,PE		6581	https://amphibiaweb.org/species/6581
Anura	Dendrobatidae	Colostethinae	Epipedobates		boulengeri		Epipedobates boulengeri			Least Concern (LC)	EC,CO		1656	https://amphibiaweb.org/species/1656
Anura	Dendrobatidae	Colostethinae	Epipedobates		darwinwallacei						EC		7608	https://amphibiaweb.org/species/7608
Anura	Dendrobatidae	Colostethinae	Epipedobates		espinosai		Epipedobates espinosai			Data Deficient (DD)	EC		1660	https://amphibiaweb.org/species/1660
Anura	Dendrobatidae	Colostethinae	Epipedobates		machalilla		Epipedobates machalilla	Colostethus machalilla	Colostethus machalilla	Near Threatened (NT)	EC		1581	https://amphibiaweb.org/species/1581
Anura	Dendrobatidae	Colostethinae	Epipedobates		narinensis	Narino Poison Frog	Epipedobates narinensis			Data Deficient (DD)	CO		7107	https://amphibiaweb.org/species/7107
Anura	Dendrobatidae	Colostethinae	Epipedobates		tricolor	Phantasmal Poison Frog, Phantasmal Poison-arrow Frog,	Epipedobates tricolor			Endangered (EN)	EC		1674	https://amphibiaweb.org/species/1674
Anura	Dendrobatidae	Colostethinae	Leucostethus		argyrogaster	Imaza Rocket Frog	Colostethus argyrogaster	Colostethus argyrogaster, Hyloxalus argyrogaster	Hyloxalus argyrogaster	Least Concern (LC)	PE		1538	https://amphibiaweb.org/species/1538
Anura	Dendrobatidae	Colostethinae	Leucostethus		fugax		Colostethus fugax	Colostethus fugax		Data Deficient (DD)	EC		1564	https://amphibiaweb.org/species/1564
Anura	Dendrobatidae	Colostethinae	Leucostethus		jota						CO		8898	https://amphibiaweb.org/species/8898
Anura	Dendrobatidae	Colostethinae	Silverstoneia		dalyi		Silverstoneia dalyi			Endangered (EN)	CO		8084	https://amphibiaweb.org/species/8084
Anura	Dendrobatidae	Colostethinae	Silverstoneia		erasmios		Silverstoneia erasmios	Colostethus erasmios	Colostethus erasmios	Data Deficient (DD)	CO		6111	https://amphibiaweb.org/species/6111
Anura	Dendrobatidae	Colostethinae	Silverstoneia		flotator		Silverstoneia flotator	Colostethus flotator	Colostethus flotator	Least Concern (LC)	PA,CR		1562	https://amphibiaweb.org/species/1562
Anura	Dendrobatidae	Colostethinae	Silverstoneia		gutturalis		Silverstoneia gutturalis			Data Deficient (DD)	CO		8080	https://amphibiaweb.org/species/8080
Anura	Dendrobatidae	Colostethinae	Silverstoneia		minima		Silverstoneia minima			Data Deficient (DD)	CO		8081	https://amphibiaweb.org/species/8081
Anura	Dendrobatidae	Colostethinae	Silverstoneia		minutissima		Silverstoneia minutissima			Near Threatened (NT)	CO		8082	https://amphibiaweb.org/species/8082
Anura	Dendrobatidae	Colostethinae	Silverstoneia		nubicola		Silverstoneia nubicola	Colostethus nubicola	Colostethus nubicola	Near Threatened (NT)	CO,PA,CR		1591	https://amphibiaweb.org/species/1591
Anura	Dendrobatidae	Colostethinae	Silverstoneia		punctiventris		Silverstoneia punctiventris			Endangered (EN)	CO		8083	https://amphibiaweb.org/species/8083
Anura	Dendrobatidae	Dendrobatinae	Adelphobates		castaneoticus	Brazil-nut Poison Frog	Adelphobates castaneoticus	Dendrobates castaneoticus	Dendrobates castaneoticus	Least Concern (LC)	BR		1629	https://amphibiaweb.org/species/1629
Anura	Dendrobatidae	Dendrobatinae	Adelphobates		galactonotus	Splash-Backed Poison Frog	Adelphobates galactonotus	Dendrobates galactonotus	Dendrobates galactonotus	Least Concern (LC)	BR		1631	https://amphibiaweb.org/species/1631
Anura	Dendrobatidae	Dendrobatinae	Adelphobates		quinquevittatus		Adelphobates quinquevittatus		Adelphobates quinquevittatus	Least Concern (LC)	BO,BR,CO		1642	https://amphibiaweb.org/species/1642
Anura	Dendrobatidae	Dendrobatinae	Andinobates		abditus		Andinobates abditus	Ranitomeya abdita	Ranitomeya abdita	Critically Endangered (CR)	EC		1687	https://amphibiaweb.org/species/1687
Anura	Dendrobatidae	Dendrobatinae	Andinobates		altobueyensis		Andinobates altobueyensis	Ranitomeya altobueyensis	Ranitomeya altobueyensis	Data Deficient (DD)	CO		1688	https://amphibiaweb.org/species/1688
Anura	Dendrobatidae	Dendrobatinae	Andinobates		bombetes	Cauca Poison Frog	Andinobates bombetes	Ranitomeya bombetes	Ranitomeya bombetes	Vulnerable (VU)	CO		1689	https://amphibiaweb.org/species/1689
Anura	Dendrobatidae	Dendrobatinae	Andinobates		cassidyhornae		Andinobates cassidyhornae			Vulnerable (VU)	CO		7974	https://amphibiaweb.org/species/7974
Anura	Dendrobatidae	Dendrobatinae	Andinobates		claudiae		Andinobates claudiae	Ranitomeya claudiae	Ranitomeya claudiae	Data Deficient (DD)	PA		5908	https://amphibiaweb.org/species/5908
Anura	Dendrobatidae	Dendrobatinae	Andinobates		daleswansoni		Andinobates daleswansoni			Endangered (EN)	CO		6773	https://amphibiaweb.org/species/6773
Anura	Dendrobatidae	Dendrobatinae	Andinobates		dorisswansonae		Andinobates dorisswansonae			Vulnerable (VU)	CO		6774	https://amphibiaweb.org/species/6774
Anura	Dendrobatidae	Dendrobatinae	Andinobates		fulguritus	Yellow-bellied poison frog	Andinobates fulguritus	Ranitomeya fulgurita	Ranitomeya fulgurita	Least Concern (LC)	PA,CO		1690	https://amphibiaweb.org/species/1690
Anura	Dendrobatidae	Dendrobatinae	Andinobates		geminisae	Poison dart frog					PA		8233	https://amphibiaweb.org/species/8233
Anura	Dendrobatidae	Dendrobatinae	Andinobates		minutus		Andinobates minutus	Dendrobates shrevei, Minyobates minutus, Ranitomeya minuta	Dendrobates shrevei, Minyobates minutus, Ranitomeya minuta	Least Concern (LC)	PA,CO		1691	https://amphibiaweb.org/species/1691
Anura	Dendrobatidae	Dendrobatinae	Andinobates		opisthomelas		Andinobates opisthomelas	Ranitomeya opisthomelas	Ranitomeya opisthomelas	Vulnerable (VU)	CO		1692	https://amphibiaweb.org/species/1692
Anura	Dendrobatidae	Dendrobatinae	Andinobates		tolimensis		Andinobates tolimensis	Dendrobates tolimensis		Vulnerable (VU)	CO		7029	https://amphibiaweb.org/species/7029
Anura	Dendrobatidae	Dendrobatinae	Andinobates		victimatus						CO		8655	https://amphibiaweb.org/species/8655
Anura	Dendrobatidae	Dendrobatinae	Andinobates		viridis		Andinobates viridis	Ranitomeya viridis	Ranitomeya viridis	Critically Endangered (CR)	CO		1694	https://amphibiaweb.org/species/1694
Anura	Dendrobatidae	Dendrobatinae	Andinobates		virolinensis		Andinobates virolinensis	Minyobates virolinensis, Ranitomeya virolinensis	Minyobates virolinensis, Ranitomeya virolinensis	Vulnerable (VU)	CO		1695	https://amphibiaweb.org/species/1695
Anura	Dendrobatidae	Dendrobatinae	Dendrobates		auratus	Green Poison Frog, Green and Black Dart-poison Frog, Gold Arrow-poison Frog	Dendrobates auratus			Least Concern (LC)	US,PA,NI,CR,CO		1625	https://amphibiaweb.org/species/1625
Anura	Dendrobatidae	Dendrobatinae	Dendrobates		leucomelas	Yellow-headed Poison Frog, Yellow-banded dart-poison frog, Bumblebee Poison Dart Frog	Dendrobates leucomelas			Least Concern (LC)	VE,GY,CO,BR		1638	https://amphibiaweb.org/species/1638
Anura	Dendrobatidae	Dendrobatinae	Dendrobates		nubeculosus		Dendrobates nubeculosus			Data Deficient (DD)	GY		6578	https://amphibiaweb.org/species/6578
Anura	Dendrobatidae	Dendrobatinae	Dendrobates		tinctorius	Dyeing Poison Frog	Dendrobates tinctorius	Dendrobates azureus, Rana tinctoria	Dendrobates azureus, Rana tinctoria	Least Concern (LC)	SR,GY,GF,BR		1646	https://amphibiaweb.org/species/1646
Anura	Dendrobatidae	Dendrobatinae	Dendrobates		truncatus		Dendrobates truncatus			Least Concern (LC)	CO		1647	https://amphibiaweb.org/species/1647
Anura	Dendrobatidae	Dendrobatinae	Excidobates		captivus	Santiago Poison Frog	Excidobates captivus	Dendrobates captivus	Dendrobates captivus	Least Concern (LC)	EC,PE		1628	https://amphibiaweb.org/species/1628
Anura	Dendrobatidae	Dendrobatinae	Excidobates		condor						EC		7915	https://amphibiaweb.org/species/7915
Anura	Dendrobatidae	Dendrobatinae	Excidobates		mysteriosus	MaraÃƒÂ±ÃƒÂ³n Poison Frog	Excidobates mysteriosus	Dendrobates mysteriosus	Dendrobates mysteriosus	Endangered (EN)	PE		1639	https://amphibiaweb.org/species/1639
Anura	Dendrobatidae	Dendrobatinae	Minyobates		steyermarki	Demonic Poison Frog or YapacanaÃ¢â‚¬â„¢s Little Red Frog	Minyobates steyermarki	Dendrobates steyermarki	Dendrobates steyermarki	Critically Endangered (CR)	VE		1693	https://amphibiaweb.org/species/1693
Anura	Dendrobatidae	Dendrobatinae	Oophaga		arborea	Polkadot Poison Frog	Oophaga arborea	Dendrobates arboreus	Dendrobates arboreus	Endangered (EN)	PA		1624	https://amphibiaweb.org/species/1624
Anura	Dendrobatidae	Dendrobatinae	Oophaga		granulifera	Granular Poison Frog	Oophaga granulifera	Dendrobates granuliferus	Dendrobates granuliferus	Vulnerable (VU)	CR,PA		1632	https://amphibiaweb.org/species/1632
Anura	Dendrobatidae	Dendrobatinae	Oophaga		histrionica	Harlequin Poison Frog	Oophaga histrionica	Dendrobates histrionicus	Dendrobates histrionicus	Least Concern (LC)	EC,CO		1633	https://amphibiaweb.org/species/1633
Anura	Dendrobatidae	Dendrobatinae	Oophaga		lehmanni	Lehmann's Frog, Red-banded Poison Frog, Harlequin Poison Frog	Oophaga lehmanni	Dendrobates lehmanni	Dendrobates lehmanni	Critically Endangered (CR)	CO		1637	https://amphibiaweb.org/species/1637
Anura	Dendrobatidae	Dendrobatinae	Oophaga		occultator		Oophaga occultator	Dendrobates occultator	Dendrobates occultator	Critically Endangered (CR)	CO		1640	https://amphibiaweb.org/species/1640
Anura	Dendrobatidae	Dendrobatinae	Oophaga		pumilio	Strawberry Poison Frog	Oophaga pumilio	Dendrobates pumilio	Dendrobates pumilio	Least Concern (LC)	PA,NI,CR		1641	https://amphibiaweb.org/species/1641
Anura	Dendrobatidae	Dendrobatinae	Oophaga		speciosa	Splendid Poison Frog	Oophaga speciosa	Dendrobates speciosus	Dendrobates speciosus	Endangered (EN)	PA		1645	https://amphibiaweb.org/species/1645
Anura	Dendrobatidae	Dendrobatinae	Oophaga		sylvatica		Oophaga sylvatica			Near Threatened (NT)	CO,EC		5910	https://amphibiaweb.org/species/5910
Anura	Dendrobatidae	Dendrobatinae	Oophaga		vicentei		Oophaga vicentei	Dendrobates vicentei	Dendrobates vicentei	Data Deficient (DD)	PA		5578	https://amphibiaweb.org/species/5578
Anura	Dendrobatidae	Dendrobatinae	Phyllobates		aurotaenia	KÃƒÂµkoÃƒÂ©	Phyllobates aurotaenia			Least Concern (LC)	CO		1704	https://amphibiaweb.org/species/1704
Anura	Dendrobatidae	Dendrobatinae	Phyllobates		bicolor	Black Leg Poison Dart Frog, NearÃƒÂ¡	Phyllobates bicolor			Endangered (EN)	CO		1705	https://amphibiaweb.org/species/1705
Anura	Dendrobatidae	Dendrobatinae	Phyllobates		lugubris	Striped Poison-Dart Frog, Lovely Poison Frog	Phyllobates lugubris			Least Concern (LC)	PA,CR		1706	https://amphibiaweb.org/species/1706
Anura	Dendrobatidae	Dendrobatinae	Phyllobates		terribilis	Golden Poison Frog	Phyllobates terribilis			Endangered (EN)	CO		1707	https://amphibiaweb.org/species/1707
Anura	Dendrobatidae	Dendrobatinae	Phyllobates		vittatus	Golfo Dulce Poison-Dart Frog	Phyllobates vittatus			Endangered (EN)	CR		1708	https://amphibiaweb.org/species/1708
Anura	Dendrobatidae	Dendrobatinae	Ranitomeya		amazonica		Ranitomeya amazonica	Dendrobates amazonicus	Dendrobates amazonicus	Data Deficient (DD)	PE		5911	https://amphibiaweb.org/species/5911
Anura	Dendrobatidae	Dendrobatinae	Ranitomeya		benedicta		Ranitomeya benedicta			Vulnerable (VU)	PE		7167	https://amphibiaweb.org/species/7167
Anura	Dendrobatidae	Dendrobatinae	Ranitomeya		cyanovittata			Dendrobates cyanovittata			PE		7488	https://amphibiaweb.org/species/7488
Anura	Dendrobatidae	Dendrobatinae	Ranitomeya		defleri		Ranitomeya defleri			Least Concern (LC)	CO		7398	https://amphibiaweb.org/species/7398
Anura	Dendrobatidae	Dendrobatinae	Ranitomeya		fantastica	Crowned Poison Frog, Red-headed Poison Frog	Ranitomeya fantastica	Dendrobates fantasticus	Dendrobates fantasticus	Near Threatened (NT)	PE		1630	https://amphibiaweb.org/species/1630
Anura	Dendrobatidae	Dendrobatinae	Ranitomeya		flavovittata		Ranitomeya flavovittata	Dendrobates flavovittatus	Dendrobates flavovittatus	Least Concern (LC)	PE		5913	https://amphibiaweb.org/species/5913
Anura	Dendrobatidae	Dendrobatinae	Ranitomeya		imitator	Imitating Poison Frog, Mimic Poison Frog, Rana Venenosa	Ranitomeya imitator	Dendrobates imitator	Dendrobates imitator	Least Concern (LC)	PE		1634	https://amphibiaweb.org/species/1634
Anura	Dendrobatidae	Dendrobatinae	Ranitomeya		reticulata	Red-backed Poison Frog, Reticulated Poison Frog	Ranitomeya reticulata	Dendrobates reticulatus	Dendrobates reticulatus	Least Concern (LC)	EC,PE		1643	https://amphibiaweb.org/species/1643
Anura	Dendrobatidae	Dendrobatinae	Ranitomeya		sirensis		Ranitomeya sirensis	Dendrobates sirensis	Dendrobates sirensis	Least Concern (LC)	PE		6580	https://amphibiaweb.org/species/6580
Anura	Dendrobatidae	Dendrobatinae	Ranitomeya		summersi		Ranitomeya summersi			Endangered (EN)	PE		7168	https://amphibiaweb.org/species/7168
Anura	Dendrobatidae	Dendrobatinae	Ranitomeya		toraro						BR		7732	https://amphibiaweb.org/species/7732
Anura	Dendrobatidae	Dendrobatinae	Ranitomeya		uakarii		Ranitomeya uakarii			Least Concern (LC)	PE		6725	https://amphibiaweb.org/species/6725
Anura	Dendrobatidae	Dendrobatinae	Ranitomeya		vanzolinii	Spotted Poison Frog	Ranitomeya vanzolinii	Dendrobates vanzolinii	Dendrobates vanzolinii	Least Concern (LC)	PE,BR		1648	https://amphibiaweb.org/species/1648
Anura	Dendrobatidae	Dendrobatinae	Ranitomeya		variabilis	Variable Poison Frog, Splash-back Poison Frog	Ranitomeya variabilis	Dendrobates variabilis	Dendrobates variabilis	Data Deficient (DD)	CO,EC,PE		6117	https://amphibiaweb.org/species/6117
Anura	Dendrobatidae	Dendrobatinae	Ranitomeya		ventrimaculata		Ranitomeya ventrimaculata	Dendrobates ventrimaculatus, Dendrobates minutus ventrimaculatus	Dendrobates ventrimaculatus, Dendrobates minutus ventrimaculatus	Least Concern (LC)	BR,CO,EC,GF,GY,PE,SR		1649	https://amphibiaweb.org/species/1649
Anura	Dendrobatidae	Dendrobatinae	Ranitomeya		yavaricola			Dendrobates yavaricola			PE		7487	https://amphibiaweb.org/species/7487
Anura	Dendrobatidae	Hyloxalinae	Ectopoglossus		absconditus						CO		8692	https://amphibiaweb.org/species/8692
Anura	Dendrobatidae	Hyloxalinae	Ectopoglossus		astralogaster						PA		7951	https://amphibiaweb.org/species/7951
Anura	Dendrobatidae	Hyloxalinae	Ectopoglossus		atopoglossus		Anomaloglossus atopoglossus	Anomaloglossus atopoglossus, Colostethus atopoglossus	Colostethus atopoglossus	Data Deficient (DD)	CO		5568	https://amphibiaweb.org/species/5568
Anura	Dendrobatidae	Hyloxalinae	Ectopoglossus		confusus			Anomaloglossus confusus		Endangered (EN)	EC		7393	https://amphibiaweb.org/species/7393
Anura	Dendrobatidae	Hyloxalinae	Ectopoglossus		isthminus						PA		7950	https://amphibiaweb.org/species/7950
Anura	Dendrobatidae	Hyloxalinae	Ectopoglossus		lacrimosus		Anomaloglossus lacrimosus	Anomaloglossus lacrimosus, Colostethus lacrimosus	Colostethus lacrimosus	Data Deficient (DD)	CO		1576	https://amphibiaweb.org/species/1576
Anura	Dendrobatidae	Hyloxalinae	Ectopoglossus		saxatilis						CO		8693	https://amphibiaweb.org/species/8693
Anura	Dendrobatidae	Hyloxalinae	Hyloxalus		abditaurantius		Hyloxalus abditaurantius	Colostethus abditaurantius	Colostethus abditaurantius	Least Concern (LC)	CO		1533	https://amphibiaweb.org/species/1533
Anura	Dendrobatidae	Hyloxalinae	Hyloxalus		aeruginosus		Hyloxalus aeruginosus			Data Deficient (DD)	PE		6355	https://amphibiaweb.org/species/6355
Anura	Dendrobatidae	Hyloxalinae	Hyloxalus		anthracinus		Hyloxalus anthracinus	Colostethus anthracinus	Colostethus anthracinus	Critically Endangered (CR)	EC		1537	https://amphibiaweb.org/species/1537
Anura	Dendrobatidae	Hyloxalinae	Hyloxalus		arliensis						CO		9156	https://amphibiaweb.org/species/9156
Anura	Dendrobatidae	Hyloxalinae	Hyloxalus		awa		Hyloxalus awa	Colostethus awa	Colostethus awa	Vulnerable (VU)	EC		1539	https://amphibiaweb.org/species/1539
Anura	Dendrobatidae	Hyloxalinae	Hyloxalus		azureiventris	Sky Blue Poison Dart Frog	Hyloxalus azureiventris	Cryptophyllobates azureiventris	Cryptophyllobates azureiventris	Endangered (EN)	PE		1652	https://amphibiaweb.org/species/1652
Anura	Dendrobatidae	Hyloxalinae	Hyloxalus		betancuri		Hyloxalus betancuri	Colostethus betancuri	Colostethus betancuri	Data Deficient (DD)	CO		1541	https://amphibiaweb.org/species/1541
Anura	Dendrobatidae	Hyloxalinae	Hyloxalus		bocagei		Hyloxalus bocagei	Colostethus bocagei	Colostethus bocagei	Least Concern (LC)	CO,EC		1542	https://amphibiaweb.org/species/1542
Anura	Dendrobatidae	Hyloxalinae	Hyloxalus		borjai		Hyloxalus borjai	Colostethus borjai	Colostethus borjai	Data Deficient (DD)	CO		6108	https://amphibiaweb.org/species/6108
Anura	Dendrobatidae	Hyloxalinae	Hyloxalus		breviquartus		Hyloxalus breviquartus	Colostethus breviquartus	Colostethus breviquartus	Data Deficient (DD)	CO,EC		1544	https://amphibiaweb.org/species/1544
Anura	Dendrobatidae	Hyloxalinae	Hyloxalus		cevallosi		Hyloxalus cevallosi	Colostethus cevallosi	Colostethus cevallosi	Endangered (EN)	EC		1550	https://amphibiaweb.org/species/1550
Anura	Dendrobatidae	Hyloxalinae	Hyloxalus		chlorocraspedus		Hyloxalus chlorocraspedus			Data Deficient (DD)	BR,PE		6667	https://amphibiaweb.org/species/6667
Anura	Dendrobatidae	Hyloxalinae	Hyloxalus		chocoensis		Hyloxalus chocoensis	Colostethus chocoensis	Colostethus chocoensis	Data Deficient (DD)	CO		1552	https://amphibiaweb.org/species/1552
Anura	Dendrobatidae	Hyloxalinae	Hyloxalus		craspedoceps		Hyloxalus craspedoceps			Data Deficient (DD)	PE		6356	https://amphibiaweb.org/species/6356
Anura	Dendrobatidae	Hyloxalinae	Hyloxalus		delatorreae		Hyloxalus delatorreae	Colostethus delatorreae	Colostethus delatorreae	Critically Endangered (CR)	EC		1554	https://amphibiaweb.org/species/1554
Anura	Dendrobatidae	Hyloxalinae	Hyloxalus		edwardsi		Hyloxalus edwardsi	Colostethus edwardsi	Colostethus edwardsi	Critically Endangered (CR)	CO		1557	https://amphibiaweb.org/species/1557
Anura	Dendrobatidae	Hyloxalinae	Hyloxalus		elachyhistus		Hyloxalus elachyhistus	Colostethus elachyhistus	Colostethus elachyhistus	Endangered (EN)	PE,EC		1558	https://amphibiaweb.org/species/1558
Anura	Dendrobatidae	Hyloxalinae	Hyloxalus		eleutherodactylus		Hyloxalus eleutherodactylus			Data Deficient (DD)	PE		6357	https://amphibiaweb.org/species/6357
Anura	Dendrobatidae	Hyloxalinae	Hyloxalus		exasperatus		Hyloxalus exasperatus	Colostethus exasperatus	Colostethus exasperatus	Data Deficient (DD)	EC		1559	https://amphibiaweb.org/species/1559
Anura	Dendrobatidae	Hyloxalinae	Hyloxalus		excisus		Hyloxalus excisus	Colostethus excisus	Colostethus excisus	Data Deficient (DD)	CO		6112	https://amphibiaweb.org/species/6112
Anura	Dendrobatidae	Hyloxalinae	Hyloxalus		faciopunctulatus		Hyloxalus faciopunctulatus	Colostethus faciopunctulatus	Colostethus faciopunctulatus	Data Deficient (DD)	CO		1560	https://amphibiaweb.org/species/1560
Anura	Dendrobatidae	Hyloxalinae	Hyloxalus		fallax		Hyloxalus fallax	Colostethus fallax	Colostethus fallax	Data Deficient (DD)	EC		1561	https://amphibiaweb.org/species/1561
Anura	Dendrobatidae	Hyloxalinae	Hyloxalus		fascianigrus		Hyloxalus fascianigrus	Colostethus fascianiger, Colostethus fascianigrus, Hyloxalus fascianiger	Colostethus fascianiger, Colostethus fascianigrus, Hyloxalus fascianiger	Vulnerable (VU)	CO		5424	https://amphibiaweb.org/species/5424
Anura	Dendrobatidae	Hyloxalinae	Hyloxalus		felixcoperari						CO		8892	https://amphibiaweb.org/species/8892
Anura	Dendrobatidae	Hyloxalinae	Hyloxalus		fuliginosus		Hyloxalus fuliginosus	Colostethus fuliginosus, Prostherapis fuliginosus	Colostethus fuliginosus, Prostherapis fuliginosus	Data Deficient (DD)	EC,CO		1565	https://amphibiaweb.org/species/1565
Anura	Dendrobatidae	Hyloxalinae	Hyloxalus		idiomelus		Hyloxalus idiomelus	Colostethus idiomelas, Colostethus idiomelus	Colostethus idiomelas, Colostethus idiomelus	Data Deficient (DD)	PE		1569	https://amphibiaweb.org/species/1569
Anura	Dendrobatidae	Hyloxalinae	Hyloxalus		infraguttatus		Hyloxalus infraguttatus	Colostethus infraguttatus	Colostethus infraguttatus	Near Threatened (NT)	EC		1571	https://amphibiaweb.org/species/1571
Anura	Dendrobatidae	Hyloxalinae	Hyloxalus		insulatus		Hyloxalus insulatus			Data Deficient (DD)	PE		6358	https://amphibiaweb.org/species/6358
Anura	Dendrobatidae	Hyloxalinae	Hyloxalus		italoi						EC,PE		7591	https://amphibiaweb.org/species/7591
Anura	Dendrobatidae	Hyloxalinae	Hyloxalus		jacobuspetersi		Colostethus jacobuspetersi	Colostethus jacobuspetersi		Critically Endangered (CR)	EC		1573	https://amphibiaweb.org/species/1573
Anura	Dendrobatidae	Hyloxalinae	Hyloxalus		lehmanni		Hyloxalus lehmanni	Colostethus lehmanni	Colostethus lehmanni	Near Threatened (NT)	CO,EC		1578	https://amphibiaweb.org/species/1578
Anura	Dendrobatidae	Hyloxalinae	Hyloxalus		leucophaeus		Hyloxalus leucophaeus			Data Deficient (DD)	PE		6359	https://amphibiaweb.org/species/6359
Anura	Dendrobatidae	Hyloxalinae	Hyloxalus		littoralis		Hyloxalus littoralis	Colostethus littoralis	Colostethus littoralis	Least Concern (LC)	PE		1580	https://amphibiaweb.org/species/1580
Anura	Dendrobatidae	Hyloxalinae	Hyloxalus		maculosus		Hyloxalus maculosus	Colostethus maculosus	Colostethus maculosus	Data Deficient (DD)	EC		6579	https://amphibiaweb.org/species/6579
Anura	Dendrobatidae	Hyloxalinae	Hyloxalus		maquipucuna		Hyloxalus maquipucuna	Colostethus maquipucuna	Colostethus maquipucuna	Data Deficient (DD)	EC		1583	https://amphibiaweb.org/species/1583
Anura	Dendrobatidae	Hyloxalinae	Hyloxalus		marmoreoventris		Hyloxalus marmoreoventris	Colostethus marmoreoventris	Colostethus marmoreoventris	Data Deficient (DD)	EC		1585	https://amphibiaweb.org/species/1585
Anura	Dendrobatidae	Hyloxalinae	Hyloxalus		mittermeieri		Hyloxalus mittermeieri	Colostethus mittermeieri	Colostethus mittermeieri	Data Deficient (DD)	PE		1588	https://amphibiaweb.org/species/1588
Anura	Dendrobatidae	Hyloxalinae	Hyloxalus		mystax		Hyloxalus mystax	Colostethus mystax	Colostethus mystax	Data Deficient (DD)	EC		1589	https://amphibiaweb.org/species/1589
Anura	Dendrobatidae	Hyloxalinae	Hyloxalus		nexipus		Hyloxalus nexipus	Colostethus nexipus	Colostethus nexipus	Least Concern (LC)	PE,EC		1590	https://amphibiaweb.org/species/1590
Anura	Dendrobatidae	Hyloxalinae	Hyloxalus		parcus		Hyloxalus parcus			Data Deficient (DD)	EC		6842	https://amphibiaweb.org/species/6842
Anura	Dendrobatidae	Hyloxalinae	Hyloxalus		patitae		Hyloxalus patitae	Colostethus patitae	Colostethus patitae	Data Deficient (DD)	PE		6221	https://amphibiaweb.org/species/6221
Anura	Dendrobatidae	Hyloxalinae	Hyloxalus		peculiaris		Hyloxalus peculiaris	Colostethus peculiaris	Colostethus peculiaris	Data Deficient (DD)	EC		1595	https://amphibiaweb.org/species/1595
Anura	Dendrobatidae	Hyloxalinae	Hyloxalus		peruvianus		Hyloxalus peruvianus	Colostethus peruvianus	Colostethus peruvianus	Least Concern (LC)	BR,PE		1596	https://amphibiaweb.org/species/1596
Anura	Dendrobatidae	Hyloxalinae	Hyloxalus		pinguis		Hyloxalus pinguis	Colostethus pinguis	Colostethus pinguis	Data Deficient (DD)	CO		1597	https://amphibiaweb.org/species/1597
Anura	Dendrobatidae	Hyloxalinae	Hyloxalus		pulchellus		Hyloxalus pulchellus	Colostethus pulchellus	Colostethus pulchellus	Vulnerable (VU)	CO,EC		1600	https://amphibiaweb.org/species/1600
Anura	Dendrobatidae	Hyloxalinae	Hyloxalus		pulcherrimus		Hyloxalus pulcherrimus			Data Deficient (DD)	PE		6361	https://amphibiaweb.org/species/6361
Anura	Dendrobatidae	Hyloxalinae	Hyloxalus		pumilus		Hyloxalus pumilus	Colostethus pumilus	Colostethus pumilus	Data Deficient (DD)	EC		1601	https://amphibiaweb.org/species/1601
Anura	Dendrobatidae	Hyloxalinae	Hyloxalus		ramosi		Hyloxalus ramosi	Colostethus ramosi	Colostethus ramosi	Data Deficient (DD)	CO		1602	https://amphibiaweb.org/species/1602
Anura	Dendrobatidae	Hyloxalinae	Hyloxalus		ruizi		Hyloxalus ruizi	Colostethus ruizi	Colostethus ruizi	Critically Endangered (CR)	CO		1604	https://amphibiaweb.org/species/1604
Anura	Dendrobatidae	Hyloxalinae	Hyloxalus		saltuarius		Hyloxalus saltuarius	Colostethus saltuarius	Colostethus saltuarius	Data Deficient (DD)	CO		5978	https://amphibiaweb.org/species/5978
Anura	Dendrobatidae	Hyloxalinae	Hyloxalus		sanctamariensis						CO		8894	https://amphibiaweb.org/species/8894
Anura	Dendrobatidae	Hyloxalinae	Hyloxalus		sauli		Hyloxalus sauli	Colostethus sauli	Colostethus sauli	Least Concern (LC)	CO,EC		1607	https://amphibiaweb.org/species/1607
Anura	Dendrobatidae	Hyloxalinae	Hyloxalus		shuar		Hyloxalus shuar	Colostethus shuar	Colostethus shuar	Near Threatened (NT)	EC		1610	https://amphibiaweb.org/species/1610
Anura	Dendrobatidae	Hyloxalinae	Hyloxalus		sordidatus		Hyloxalus sordidatus			Data Deficient (DD)	PE		6362	https://amphibiaweb.org/species/6362
Anura	Dendrobatidae	Hyloxalinae	Hyloxalus		spilotogaster		Hyloxalus spilotogaster			Data Deficient (DD)	PE		6363	https://amphibiaweb.org/species/6363
Anura	Dendrobatidae	Hyloxalinae	Hyloxalus		subpunctatus		Hyloxalus subpunctatus	Colostethus subpunctatus	Colostethus subpunctatus	Least Concern (LC)	CO		1612	https://amphibiaweb.org/species/1612
Anura	Dendrobatidae	Hyloxalinae	Hyloxalus		sylvaticus		Hyloxalus sylvaticus	Colostethus sylvaticus	Colostethus sylvaticus	Data Deficient (DD)	PE		1613	https://amphibiaweb.org/species/1613
Anura	Dendrobatidae	Hyloxalinae	Hyloxalus		toachi		Hyloxalus toachi	Colostethus toachi	Colostethus toachi	Endangered (EN)	EC		1615	https://amphibiaweb.org/species/1615
Anura	Dendrobatidae	Hyloxalinae	Hyloxalus		utcubambensis		Hyloxalus utcubambensis	Colostethus utcubambensis	Colostethus utcubambensis	Data Deficient (DD)	PE		1618	https://amphibiaweb.org/species/1618
Anura	Dendrobatidae	Hyloxalinae	Hyloxalus		vergeli		Hyloxalus vergeli	Colostethus vergeli	Colostethus vergeli	Vulnerable (VU)	CO		1619	https://amphibiaweb.org/species/1619
Anura	Dendrobatidae	Hyloxalinae	Hyloxalus		vertebralis		Hyloxalus vertebralis	Colostethus vertebralis	Colostethus vertebralis	Critically Endangered (CR)	EC		1620	https://amphibiaweb.org/species/1620
Anura	Dendrobatidae	Hyloxalinae	Hyloxalus		whymperi		Hyloxalus whymperi	Colostethus whymperi, Phyllobates whymperi, Colostethus whimperi	Colostethus whymperi, Phyllobates whymperi, Colostethus whimperi	Data Deficient (DD)	EC		1621	https://amphibiaweb.org/species/1621
Anura	Dendrobatidae	Hyloxalinae	Hyloxalus		yasuni						EC		7592	https://amphibiaweb.org/species/7592
Anura	Dicroglossidae	Dicroglossinae	Allopaa		barmoachensis			Paa barmoachensis	Paa barmoachensis		IN,PK		7446	https://amphibiaweb.org/species/7446
Anura	Dicroglossidae	Dicroglossinae	Allopaa		hazarensis	Hazara torrent frog	Allopaa hazarensis	Paa hazarensis, Nanorana hazarensis, Rana hazarensis	Paa hazarensis, Nanorana hazarensis, Rana hazarensis	Least Concern (LC)	IN,PK		4867	https://amphibiaweb.org/species/4867
Anura	Dicroglossidae	Dicroglossinae	Chrysopaa		sternosignata	Karez frog	Chrysopaa sternosignata	Paa sternosignata, Rana sternosignata, Nanorana sternosignata	Paa sternosignata, Rana sternosignata, Nanorana sternosignata	Least Concern (LC)	AF,IN,PK		7445	https://amphibiaweb.org/species/7445
Anura	Dicroglossidae	Dicroglossinae	Euphlyctis		aloysii						IN		7281	https://amphibiaweb.org/species/7281
Anura	Dicroglossidae	Dicroglossinae	Euphlyctis		cyanophlyctis	Common skittering frog	Euphlyctis cyanophlyctis			Least Concern (LC)	AF,BT,IN,IR,NP,PK,LK		4703	https://amphibiaweb.org/species/4703
Anura	Dicroglossidae	Dicroglossinae	Euphlyctis		ehrenbergii		Euphlyctis ehrenbergii			Least Concern (LC)	SA,YE		4704	https://amphibiaweb.org/species/4704
Anura	Dicroglossidae	Dicroglossinae	Euphlyctis		ghoshi		Euphlyctis ghoshi			Data Deficient (DD)	IN		5039	https://amphibiaweb.org/species/5039
Anura	Dicroglossidae	Dicroglossinae	Euphlyctis		hexadactylus	Indian Five-fingered Frog, Indian Bullfrog (CITES)	Euphlyctis hexadactylus			Least Concern (LC)	LK,NP,IN,BD		4705	https://amphibiaweb.org/species/4705
Anura	Dicroglossidae	Dicroglossinae	Euphlyctis		kalasgramensis						BD		8305	https://amphibiaweb.org/species/8305
Anura	Dicroglossidae	Dicroglossinae	Euphlyctis		karaavali	Karaavali Skittering Frog					IN		8562	https://amphibiaweb.org/species/8562
Anura	Dicroglossidae	Dicroglossinae	Euphlyctis		mudigere						IN		7282	https://amphibiaweb.org/species/7282
Anura	Dicroglossidae	Dicroglossinae	Fejervarya		altilabris		Fejervarya altilabris			Data Deficient (DD)	MM		6684	https://amphibiaweb.org/species/6684	Considered a name not associated with a biological population of frogs in Fei, L., C.-y. Ye, J.- p. Jiang, and F. Xie. 2002. On taxonomic status of Rana limnocharis group with revision of nomenclature of the Rice Frog from China. Herpetologica Sinica 9: 88Ã¢â‚¬â€œ96. Invalid name in Matsui, M., M. Toda, and H. Ota. 2008 "2007". A new species of frog allied to Fejervarya limnocharis from southern …
Anura	Dicroglossidae	Dicroglossinae	Fejervarya		assimilis		Fejervarya assimilis			Data Deficient (DD)	IN		6685	https://amphibiaweb.org/species/6685	This name is not associated with any known biological population, but it appears on lists and in publications. Considered "invalid" by Matsui, Toda & Ota 2008 Curr Herpt 26:73.
Anura	Dicroglossidae	Dicroglossinae	Fejervarya		brama		Fejervarya brama				IN		6686	https://amphibiaweb.org/species/6686	This is a problematic name, considered incertae sedis by Amphibian Species of the World. It cannot be associated with a biological populations but appears on some lists, including IUCN.
Anura	Dicroglossidae	Dicroglossinae	Fejervarya		cancrivora	Crab-eating Frog, Mangrove Frog, Asian Brackish Frog, Crab-eating Grassfrog	Fejervarya cancrivora	Fejervarya raja		Least Concern (LC)	BN,KH,GU,IN,ID,LA,MY,MM,SG,TH,VN	,GU	4748	https://amphibiaweb.org/species/4748
Anura	Dicroglossidae	Dicroglossinae	Fejervarya		frithi		Fejervarya frithi	Fejervarya frithii	Fejervarya frithii		BD		6687	https://amphibiaweb.org/species/6687	This name is not associated with any known biological population, but it appears on lists and in publications. Considered "invalid" by Matsui, Toda & Ota 2008 Curr Herpt 26:73.
Anura	Dicroglossidae	Dicroglossinae	Fejervarya		iskandari		Fejervarya iskandari			Least Concern (LC)	ID		5853	https://amphibiaweb.org/species/5853
Anura	Dicroglossidae	Dicroglossinae	Fejervarya		kawamurai						CN,JP		7784	https://amphibiaweb.org/species/7784
Anura	Dicroglossidae	Dicroglossinae	Fejervarya		kupitzi						MM		9033	https://amphibiaweb.org/species/9033
Anura	Dicroglossidae	Dicroglossinae	Fejervarya		limnocharis	Alpine cricket frog	Fejervarya limnocharis			Least Concern (LC)	BD,BN,KH,GU,HK,IN,ID,JP,LA,MO,MY,MM,NP,PK,PH,SG,LK,TW,TH,VN	,GU	4770	https://amphibiaweb.org/species/4770
Anura	Dicroglossidae	Dicroglossinae	Fejervarya		moodiei	Crab-eating Frog, Mangrove Frog	Fejervarya moodiei			Data Deficient (DD)	PH		7818	https://amphibiaweb.org/species/7818
Anura	Dicroglossidae	Dicroglossinae	Fejervarya		multistriata	Grassfrog	Fejervarya multistriata			Data Deficient (DD)	CN,HK,IN,MM,TW,TH		7785	https://amphibiaweb.org/species/7785
Anura	Dicroglossidae	Dicroglossinae	Fejervarya		orissaensis		Fejervarya orissaensis			Least Concern (LC)	IN,MM		5670	https://amphibiaweb.org/species/5670
Anura	Dicroglossidae	Dicroglossinae	Fejervarya		pulla						MY		8869	https://amphibiaweb.org/species/8869
Anura	Dicroglossidae	Dicroglossinae	Fejervarya		sakishimensis						JP,TW		7174	https://amphibiaweb.org/species/7174
Anura	Dicroglossidae	Dicroglossinae	Fejervarya		triora		Fejervarya triora			Least Concern (LC)	TH		6878	https://amphibiaweb.org/species/6878
Anura	Dicroglossidae	Dicroglossinae	Fejervarya		verruculosa		Fejervarya verruculosa			Least Concern (LC)	PG,ID		4803	https://amphibiaweb.org/species/4803
Anura	Dicroglossidae	Dicroglossinae	Fejervarya		vittigera		Fejervarya vittigera			Least Concern (LC)	PH		4805	https://amphibiaweb.org/species/4805
Anura	Dicroglossidae	Dicroglossinae	Hoplobatrachus		crassus	Jerdon`s Bullfrog	Hoplobatrachus crassus			Least Concern (LC)	BD,LK,NP,IN		4711	https://amphibiaweb.org/species/4711
Anura	Dicroglossidae	Dicroglossinae	Hoplobatrachus		litoralis						BD		7826	https://amphibiaweb.org/species/7826
Anura	Dicroglossidae	Dicroglossinae	Hoplobatrachus		occipitalis	Crowned bullfrog	Hoplobatrachus occipitalis			Least Concern (LC)	DZ,AO,BJ,BF,BI,CM,CF,TD,CG,CD,ER,ET,GA,GM,GH,GN,GW,KE,LR,ML,MR,MA,MZ,NE,NG,RW,SN,SL,SS,SD,TZ,TG,UG,ZM		4713	https://amphibiaweb.org/species/4713
Anura	Dicroglossidae	Dicroglossinae	Hoplobatrachus		rugulosus	Asian Rugose Bullfrog	Hoplobatrachus rugulosus	Hoplobatrachus chinensis, Rana chinensis, Rana rugulosa	Hoplobatrachus chinensis, Rana chinensis, Rana rugulosa	Least Concern (LC)	KH,CN,HK,LA,MO,MY,MM,PH,TW,TH,VN	MY,PH	4714	https://amphibiaweb.org/species/4714
Anura	Dicroglossidae	Dicroglossinae	Hoplobatrachus		tigerinus	Indus Valley Bullfrog	Hoplobatrachus tigerinus	Bufo typhonius	Bufo typhonius	Least Concern (LC)	AF,BD,BT,IN,MG,MV,MM,NP,PK,LK	MG,MV	4715	https://amphibiaweb.org/species/4715
Anura	Dicroglossidae	Dicroglossinae	Limnonectes		acanthi		Limnonectes acanthi			Vulnerable (VU)	PH		4743	https://amphibiaweb.org/species/4743
Anura	Dicroglossidae	Dicroglossinae	Limnonectes		arathooni		Limnonectes arathooni			Endangered (EN)	ID		4745	https://amphibiaweb.org/species/4745
Anura	Dicroglossidae	Dicroglossinae	Limnonectes		asperatus		Limnonectes asperatus			Near Threatened (NT)	ID		5666	https://amphibiaweb.org/species/5666
Anura	Dicroglossidae	Dicroglossinae	Limnonectes		bannaensis						CN,LA,VN		7087	https://amphibiaweb.org/species/7087
Anura	Dicroglossidae	Dicroglossinae	Limnonectes		blythii	Blyth's River Frog, Blyth's Wart Frog, Giant Asian River Frog, Malayan Giant Frog, Blyth's Fanged Frog	Limnonectes blythii			Near Threatened (NT)	ID,LA,MY,MM,PH,SG,TH,VN		4746	https://amphibiaweb.org/species/4746
Anura	Dicroglossidae	Dicroglossinae	Limnonectes		cintalubang						MY		8260	https://amphibiaweb.org/species/8260
Anura	Dicroglossidae	Dicroglossinae	Limnonectes		coffeatus						LA		8768	https://amphibiaweb.org/species/8768
Anura	Dicroglossidae	Dicroglossinae	Limnonectes		conspicillatus	Matang Creek Frog					MY		9154	https://amphibiaweb.org/species/9154
Anura	Dicroglossidae	Dicroglossinae	Limnonectes		dabanus		Limnonectes dabanus	Limnonectes toumanoffi, Rana toumanoffi, Euphlyctis toumanoffi	Limnonectes toumanoffi, Rana toumanoffi, Euphlyctis toumanoffi	Least Concern (LC)	VN		4750	https://amphibiaweb.org/species/4750
Anura	Dicroglossidae	Dicroglossinae	Limnonectes		dammermani		Limnonectes dammermani			Near Threatened (NT)	ID		4751	https://amphibiaweb.org/species/4751
Anura	Dicroglossidae	Dicroglossinae	Limnonectes		deinodon						MY		9155	https://amphibiaweb.org/species/9155
Anura	Dicroglossidae	Dicroglossinae	Limnonectes		diuatus		Limnonectes diuatus			Vulnerable (VU)	PH		4752	https://amphibiaweb.org/species/4752
Anura	Dicroglossidae	Dicroglossinae	Limnonectes		doriae	Doria's Fanged Frog	Limnonectes doriae			Least Concern (LC)	IN,MM,TH		4753	https://amphibiaweb.org/species/4753
Anura	Dicroglossidae	Dicroglossinae	Limnonectes		ferneri	Ferner's Fanged Frog					PH		7295	https://amphibiaweb.org/species/7295
Anura	Dicroglossidae	Dicroglossinae	Limnonectes		finchi	Finch's Wart Frog	Limnonectes finchi			Least Concern (LC)	ID,MY		4754	https://amphibiaweb.org/species/4754
Anura	Dicroglossidae	Dicroglossinae	Limnonectes		fragilis		Limnonectes fragilis			Vulnerable (VU)	CN		4755	https://amphibiaweb.org/species/4755
Anura	Dicroglossidae	Dicroglossinae	Limnonectes		fujianensis		Limnonectes fujianensis			Least Concern (LC)	CN		5321	https://amphibiaweb.org/species/5321
Anura	Dicroglossidae	Dicroglossinae	Limnonectes		grunniens		Limnonectes grunniens			Least Concern (LC)	ID		4757	https://amphibiaweb.org/species/4757
Anura	Dicroglossidae	Dicroglossinae	Limnonectes		gyldenstolpei		Limnonectes gyldenstolpei			Least Concern (LC)	KH,LA,MY,TH		4792	https://amphibiaweb.org/species/4792
Anura	Dicroglossidae	Dicroglossinae	Limnonectes		hascheanus		Limnonectes hascheanus			Least Concern (LC)	VN,ID,MY,IN		5194	https://amphibiaweb.org/species/5194
Anura	Dicroglossidae	Dicroglossinae	Limnonectes		heinrichi		Limnonectes heinrichi			Vulnerable (VU)	ID		4758	https://amphibiaweb.org/species/4758
Anura	Dicroglossidae	Dicroglossinae	Limnonectes		hikidai			Limnonectes laticeps			MY		8228	https://amphibiaweb.org/species/8228
Anura	Dicroglossidae	Dicroglossinae	Limnonectes		ibanorum		Limnonectes ibanorum			Near Threatened (NT)	ID,MY		4759	https://amphibiaweb.org/species/4759
Anura	Dicroglossidae	Dicroglossinae	Limnonectes		ingeri		Limnonectes ingeri			Near Threatened (NT)	BN,ID,MY		4760	https://amphibiaweb.org/species/4760
Anura	Dicroglossidae	Dicroglossinae	Limnonectes		isanensis	Isan Big-headed frog	Limnonectes isanensis			Vulnerable (VU)	TH		7943	https://amphibiaweb.org/species/7943
Anura	Dicroglossidae	Dicroglossinae	Limnonectes		jarujini		Limnonectes jarujini			Least Concern (LC)	TH		7554	https://amphibiaweb.org/species/7554
Anura	Dicroglossidae	Dicroglossinae	Limnonectes		kadarsani		Limnonectes kadarsani			Least Concern (LC)	ID		5667	https://amphibiaweb.org/species/5667
Anura	Dicroglossidae	Dicroglossinae	Limnonectes		kenepaiensis		Limnonectes kenepaiensis			Data Deficient (DD)	ID,MY		4761	https://amphibiaweb.org/species/4761
Anura	Dicroglossidae	Dicroglossinae	Limnonectes		khammonensis		Limnonectes khammonensis			Data Deficient (DD)	VN,LA		4763	https://amphibiaweb.org/species/4763
Anura	Dicroglossidae	Dicroglossinae	Limnonectes		khasianus		Limnonectes khasianus	Limnonectes laticeps		Data Deficient (DD)	IN		4764	https://amphibiaweb.org/species/4764
Anura	Dicroglossidae	Dicroglossinae	Limnonectes		kiziriani	KizirianÃ¢â‚¬â„¢s Frog (English); Ã¡ÂºÂ¾ch nhÃ¡ÂºÂ½o ki-zi-ri-an (Vietnamese).					VN		8922	https://amphibiaweb.org/species/8922
Anura	Dicroglossidae	Dicroglossinae	Limnonectes		kohchangae		Limnonectes kohchangae			Least Concern (LC)	KH,LA,TH,VN		4766	https://amphibiaweb.org/species/4766
Anura	Dicroglossidae	Dicroglossinae	Limnonectes		kong						MY		8686	https://amphibiaweb.org/species/8686
Anura	Dicroglossidae	Dicroglossinae	Limnonectes		kuhlii		Limnonectes kuhlii			Least Concern (LC)	IN,ID,MY		4767	https://amphibiaweb.org/species/4767
Anura	Dicroglossidae	Dicroglossinae	Limnonectes		larvaepartus						ID		8292	https://amphibiaweb.org/species/8292
Anura	Dicroglossidae	Dicroglossinae	Limnonectes		lauhachindai	Lauhachinda's Fanged Frog, Kob Ngon Arjarn Virayuth (Thai)					TH		8334	https://amphibiaweb.org/species/8334
Anura	Dicroglossidae	Dicroglossinae	Limnonectes		leporinus		Limnonectes leporinus			Least Concern (LC)	MY,ID,BN		5668	https://amphibiaweb.org/species/5668
Anura	Dicroglossidae	Dicroglossinae	Limnonectes		leytensis		Limnonectes leytensis			Least Concern (LC)	PH		4769	https://amphibiaweb.org/species/4769
Anura	Dicroglossidae	Dicroglossinae	Limnonectes		limborgi	Limborg's Fanged Frog	Limnonectes limborgi			Least Concern (LC)	LA,MM		5195	https://amphibiaweb.org/species/5195
Anura	Dicroglossidae	Dicroglossinae	Limnonectes		liui		Limnonectes liui			Vulnerable (VU)	CN		4733	https://amphibiaweb.org/species/4733
Anura	Dicroglossidae	Dicroglossinae	Limnonectes		longchuanensis						CN,MM		8465	https://amphibiaweb.org/species/8465
Anura	Dicroglossidae	Dicroglossinae	Limnonectes		macrocephalus		Limnonectes macrocephalus			Near Threatened (NT)	PH		4771	https://amphibiaweb.org/species/4771
Anura	Dicroglossidae	Dicroglossinae	Limnonectes		macrodon		Limnonectes macrodon			Vulnerable (VU)	ID		4772	https://amphibiaweb.org/species/4772
Anura	Dicroglossidae	Dicroglossinae	Limnonectes		macrognathus		Limnonectes macrognathus			Least Concern (LC)	TH,MY,MM		4773	https://amphibiaweb.org/species/4773
Anura	Dicroglossidae	Dicroglossinae	Limnonectes		magnus		Limnonectes magnus			Near Threatened (NT)	ID,PH		4774	https://amphibiaweb.org/species/4774
Anura	Dicroglossidae	Dicroglossinae	Limnonectes		malesianus		Limnonectes malesianus			Near Threatened (NT)	SG,MY,ID		4775	https://amphibiaweb.org/species/4775
Anura	Dicroglossidae	Dicroglossinae	Limnonectes		mawlyndipi		Limnonectes mawlyndipi			Data Deficient (DD)	IN		4776	https://amphibiaweb.org/species/4776
Anura	Dicroglossidae	Dicroglossinae	Limnonectes		megastomias	Khorat big-mouthed frog	Limnonectes megastomias			Vulnerable (VU)	TH		7148	https://amphibiaweb.org/species/7148
Anura	Dicroglossidae	Dicroglossinae	Limnonectes		micrixalus		Limnonectes micrixalus			Data Deficient (DD)	PH		4778	https://amphibiaweb.org/species/4778
Anura	Dicroglossidae	Dicroglossinae	Limnonectes		microdiscus		Limnonectes microdiscus			Least Concern (LC)	ID		4779	https://amphibiaweb.org/species/4779
Anura	Dicroglossidae	Dicroglossinae	Limnonectes		microtympanum		Limnonectes microtympanum			Endangered (EN)	ID		4780	https://amphibiaweb.org/species/4780
Anura	Dicroglossidae	Dicroglossinae	Limnonectes		modestus		Limnonectes modestus			Least Concern (LC)	ID		4781	https://amphibiaweb.org/species/4781
Anura	Dicroglossidae	Dicroglossinae	Limnonectes		namiyei	Namie's frog	Limnonectes namiyei			Endangered (EN)	JP		4783	https://amphibiaweb.org/species/4783
Anura	Dicroglossidae	Dicroglossinae	Limnonectes		nguyenorum						VN		8335	https://amphibiaweb.org/species/8335
Anura	Dicroglossidae	Dicroglossinae	Limnonectes		nitidus		Limnonectes nitidus			Endangered (EN)	MY		4786	https://amphibiaweb.org/species/4786
Anura	Dicroglossidae	Dicroglossinae	Limnonectes		palavanensis	Palawan Wart Frog	Limnonectes palavanensis			Least Concern (LC)	PH,MY,ID		4787	https://amphibiaweb.org/species/4787
Anura	Dicroglossidae	Dicroglossinae	Limnonectes		paramacrodon		Limnonectes paramacrodon			Near Threatened (NT)	ID,MY,SG		4788	https://amphibiaweb.org/species/4788
Anura	Dicroglossidae	Dicroglossinae	Limnonectes		parvus		Limnonectes parvus			Vulnerable (VU)	PH		4790	https://amphibiaweb.org/species/4790
Anura	Dicroglossidae	Dicroglossinae	Limnonectes		plicatellus		Limnonectes plicatellus			Least Concern (LC)	MY,SG,TH		4793	https://amphibiaweb.org/species/4793
Anura	Dicroglossidae	Dicroglossinae	Limnonectes		poilani		Limnonectes poilani			Least Concern (LC)	KH,VN		6843	https://amphibiaweb.org/species/6843
Anura	Dicroglossidae	Dicroglossinae	Limnonectes		quangninhensis						VN		8626	https://amphibiaweb.org/species/8626
Anura	Dicroglossidae	Dicroglossinae	Limnonectes		rhacodus		Limnonectes rhacodus			Near Threatened (NT)	ID		5671	https://amphibiaweb.org/species/5671
Anura	Dicroglossidae	Dicroglossinae	Limnonectes		savan	Savan Fanged-Frog; Kop Hone Savan, Kop Panomdongrak					LA,TH		9002	https://amphibiaweb.org/species/9002
Anura	Dicroglossidae	Dicroglossinae	Limnonectes		selatan						MY		8255	https://amphibiaweb.org/species/8255
Anura	Dicroglossidae	Dicroglossinae	Limnonectes		shompenorum		Limnonectes shompenorum			Least Concern (LC)	IN		4797	https://amphibiaweb.org/species/4797
Anura	Dicroglossidae	Dicroglossinae	Limnonectes		sinuatodorsalis						ID,MY		8376	https://amphibiaweb.org/species/8376
Anura	Dicroglossidae	Dicroglossinae	Limnonectes		sisikdagu						ID		7752	https://amphibiaweb.org/species/7752
Anura	Dicroglossidae	Dicroglossinae	Limnonectes		taylori		Limnonectes taylori			Least Concern (LC)	CN,LA,MM,TH		7553	https://amphibiaweb.org/species/7553
Anura	Dicroglossidae	Dicroglossinae	Limnonectes		timorensis						ID		4800	https://amphibiaweb.org/species/4800
Anura	Dicroglossidae	Dicroglossinae	Limnonectes		tweediei		Limnonectes tweediei			Near Threatened (NT)	MY		4802	https://amphibiaweb.org/species/4802
Anura	Dicroglossidae	Dicroglossinae	Limnonectes		utara						MY		8256	https://amphibiaweb.org/species/8256
Anura	Dicroglossidae	Dicroglossinae	Limnonectes		visayanus		Limnonectes visayanus			Vulnerable (VU)	PH		4804	https://amphibiaweb.org/species/4804
Anura	Dicroglossidae	Dicroglossinae	Limnonectes		woodworthi		Limnonectes woodworthi			Least Concern (LC)	PH		4806	https://amphibiaweb.org/species/4806
Anura	Dicroglossidae	Dicroglossinae	Minervarya		agricola			Minervarya granosa			IN		8965	https://amphibiaweb.org/species/8965
Anura	Dicroglossidae	Dicroglossinae	Minervarya		andamanensis		Fejervarya andamanensis	Fejervarya andamanensis		Least Concern (LC)	IN		4744	https://amphibiaweb.org/species/4744
Anura	Dicroglossidae	Dicroglossinae	Minervarya		asmati			Fejervarya asmati			BD		7626	https://amphibiaweb.org/species/7626
Anura	Dicroglossidae	Dicroglossinae	Minervarya		brevipalmata		Fejervarya brevipalmata	Fejervarya brevipalmata		Data Deficient (DD)	IN		4747	https://amphibiaweb.org/species/4747
Anura	Dicroglossidae	Dicroglossinae	Minervarya		caperata	Canara Cricket Frog		Fejervarya caperata			IN		7175	https://amphibiaweb.org/species/7175
Anura	Dicroglossidae	Dicroglossinae	Minervarya		cepfi	CEPF Burrowing Frog		Fejervarya cepfi			IN		8638	https://amphibiaweb.org/species/8638
Anura	Dicroglossidae	Dicroglossinae	Minervarya		chiangmaiensis	Chiang Mai Rain-Pool Frog; Kob-Nonglek Chiang Mai (Thai)		Fejervarya chiangmaiensis			MM,TH		8571	https://amphibiaweb.org/species/8571
Anura	Dicroglossidae	Dicroglossinae	Minervarya		chilapata			Fejervarya chilapata			IN		7377	https://amphibiaweb.org/species/7377
Anura	Dicroglossidae	Dicroglossinae	Minervarya		dhaka			Fejervarya dhaka			BD		8452	https://amphibiaweb.org/species/8452
Anura	Dicroglossidae	Dicroglossinae	Minervarya		goemchi	Goan large fejervarya					IN		8827	https://amphibiaweb.org/species/8827
Anura	Dicroglossidae	Dicroglossinae	Minervarya		gomantaki	goan fejervarya		Fejervarya gomantaki			IN		8357	https://amphibiaweb.org/species/8357
Anura	Dicroglossidae	Dicroglossinae	Minervarya		greenii	Sri Lanka paddy field frog	Fejervarya greenii	Fejervarya greenii		Endangered (EN)	LK		4756	https://amphibiaweb.org/species/4756
Anura	Dicroglossidae	Dicroglossinae	Minervarya		jhilmilensis	Jhilmil terrestrial frog					IN		8828	https://amphibiaweb.org/species/8828
Anura	Dicroglossidae	Dicroglossinae	Minervarya		kadar	Kadar Burrowing Frog		Fejervarya kadar			IN		8639	https://amphibiaweb.org/species/8639
Anura	Dicroglossidae	Dicroglossinae	Minervarya		kalinga	Kalinga Cricket frog					IN		8854	https://amphibiaweb.org/species/8854
Anura	Dicroglossidae	Dicroglossinae	Minervarya		keralensis		Fejervarya keralensis	Fejervarya keralensis		Least Concern (LC)	IN		4762	https://amphibiaweb.org/species/4762
Anura	Dicroglossidae	Dicroglossinae	Minervarya		kirtisinghei	Mountain Paddy Field Frog	Fejervarya kirtisinghei	Fejervarya kirtisinghei		Least Concern (LC)	LK		4765	https://amphibiaweb.org/species/4765
Anura	Dicroglossidae	Dicroglossinae	Minervarya		krishnan	Jog Krishnan cricket frog					IN		8855	https://amphibiaweb.org/species/8855
Anura	Dicroglossidae	Dicroglossinae	Minervarya		kudremukhensis	Kudremukh Cricket Frog		Fejervarya kudremukhensis			IN		7177	https://amphibiaweb.org/species/7177
Anura	Dicroglossidae	Dicroglossinae	Minervarya		manoharani	Manoharan's Burrowing Frog		Fejervarya manoharani			IN		8640	https://amphibiaweb.org/species/8640
Anura	Dicroglossidae	Dicroglossinae	Minervarya		marathi	Marathi Fejervarya frog					IN		8952	https://amphibiaweb.org/species/8952
Anura	Dicroglossidae	Dicroglossinae	Minervarya		modesta	Shimoga Night Frog		Nyctibatrachus modestus, Fejervarya modesta			IN		4840	https://amphibiaweb.org/species/4840
Anura	Dicroglossidae	Dicroglossinae	Minervarya		muangkanensis						MM,TH		8929	https://amphibiaweb.org/species/8929
Anura	Dicroglossidae	Dicroglossinae	Minervarya		mudduraja	Muddu Raja Fejervarya, Mudduraja Cricket Frog		Fejervarya mudduraja			IN		7178	https://amphibiaweb.org/species/7178
Anura	Dicroglossidae	Dicroglossinae	Minervarya		murthii		Fejervarya murthii	Fejervarya murthii		Critically Endangered (CR)	IN		4782	https://amphibiaweb.org/species/4782
Anura	Dicroglossidae	Dicroglossinae	Minervarya		mysorensis		Fejervarya mysorensis	Fejervarya mysorensis		Data Deficient (DD)	IN		5669	https://amphibiaweb.org/species/5669
Anura	Dicroglossidae	Dicroglossinae	Minervarya		neilcoxi	Neil Cox's Burrowing Frog		Fejervarya neilcoxi			IN		8641	https://amphibiaweb.org/species/8641
Anura	Dicroglossidae	Dicroglossinae	Minervarya		nepalensis		Fejervarya nepalensis	Fejervarya nepalensis		Least Concern (LC)	BD,BT,IN,NP		4784	https://amphibiaweb.org/species/4784
Anura	Dicroglossidae	Dicroglossinae	Minervarya		nicobariensis	Nicobar Frog					IN		8867	https://amphibiaweb.org/species/8867
Anura	Dicroglossidae	Dicroglossinae	Minervarya		nilagirica		Fejervarya nilagirica	Fejervarya nilagirica		Endangered (EN)	IN		4785	https://amphibiaweb.org/species/4785
Anura	Dicroglossidae	Dicroglossinae	Minervarya		parambikulamana		Fejervarya parambikulamana	Fejervarya parambikulamana		Data Deficient (DD)	IN		4789	https://amphibiaweb.org/species/4789
Anura	Dicroglossidae	Dicroglossinae	Minervarya		pierrei		Fejervarya pierrei	Fejervarya pierrei		Least Concern (LC)	BD,BT,IN,NP		4791	https://amphibiaweb.org/species/4791
Anura	Dicroglossidae	Dicroglossinae	Minervarya		rufescens		Fejervarya rufescens	Fejervarya rufescens		Least Concern (LC)	IN		4795	https://amphibiaweb.org/species/4795
Anura	Dicroglossidae	Dicroglossinae	Minervarya		sahyadris		Minervarya sahyadris	Fejervarya sahyadris	Minervarya sahyadris	Endangered (EN)	IN		5926	https://amphibiaweb.org/species/5926
Anura	Dicroglossidae	Dicroglossinae	Minervarya		sauriceps		Fejervarya sauriceps	Fejervarya sauriceps		Data Deficient (DD)	IN		4796	https://amphibiaweb.org/species/4796
Anura	Dicroglossidae	Dicroglossinae	Minervarya		sengupti			Fejervarya sengupti			IN		7791	https://amphibiaweb.org/species/7791
Anura	Dicroglossidae	Dicroglossinae	Minervarya		syhadrensis	Southern cricket frog	Fejervarya syhadrensis	Fejervarya syhadrensis		Least Concern (LC)	BD,IN,NP,PK		4798	https://amphibiaweb.org/species/4798
Anura	Dicroglossidae	Dicroglossinae	Minervarya		teraiensis		Fejervarya teraiensis	Fejervarya teraiensis		Least Concern (LC)	BD,BT,IN,NP		4799	https://amphibiaweb.org/species/4799
Anura	Dicroglossidae	Dicroglossinae	Nannophrys		ceylonensis	Sri Lanka rock frog	Nannophrys ceylonensis			Vulnerable (VU)	LK		4825	https://amphibiaweb.org/species/4825
Anura	Dicroglossidae	Dicroglossinae	Nannophrys		guentheri		Nannophrys guentheri			Extinct (EX)	LK		4826	https://amphibiaweb.org/species/4826
Anura	Dicroglossidae	Dicroglossinae	Nannophrys		marmorata	Kirthisinghe's rock frog	Nannophrys marmorata			Critically Endangered (CR)	LK		4827	https://amphibiaweb.org/species/4827
Anura	Dicroglossidae	Dicroglossinae	Nannophrys		naeyakai	Sri Lanka Tribal Rock Frog	Nannophrys naeyakai			Endangered (EN)	LK		6888	https://amphibiaweb.org/species/6888
Anura	Dicroglossidae	Dicroglossinae	Nanorana		aenea		Nanorana aenea	Chaparana aenea, Chaparana fansipani, Rana aenea	Chaparana aenea, Chaparana fansipani, Rana aenea	Least Concern (LC)	CN,TH,VN		7442	https://amphibiaweb.org/species/7442
Anura	Dicroglossidae	Dicroglossinae	Nanorana		annandalii		Nanorana annandalii	Paa annandalii, Rana annandalii, Chaparana annandalii	Paa annandalii, Rana annandalii, Chaparana annandalii	Near Threatened (NT)	BT,IN,NP		4856	https://amphibiaweb.org/species/4856
Anura	Dicroglossidae	Dicroglossinae	Nanorana		arnoldi		Nanorana arnoldi	Paa arnoldi, Chaparana arnoldi	Paa arnoldi, Chaparana arnoldi	Near Threatened (NT)	CN,IN,MM		4857	https://amphibiaweb.org/species/4857
Anura	Dicroglossidae	Dicroglossinae	Nanorana		arunachalensis						IN		8831	https://amphibiaweb.org/species/8831
Anura	Dicroglossidae	Dicroglossinae	Nanorana		blanfordii		Nanorana blanfordii	Paa blanfordii, Rana blanfordii, Rana yadongensis	Paa blanfordii, Rana blanfordii, Rana yadongensis	Least Concern (LC)	BT,CN,IN,NP		4858	https://amphibiaweb.org/species/4858
Anura	Dicroglossidae	Dicroglossinae	Nanorana		chayuensis			Paa chayuensis, Chaparana chayuensis, Rana maculosa chayuensis	Paa chayuensis, Chaparana chayuensis, Rana maculosa chayuensis		CN,IN		4861	https://amphibiaweb.org/species/4861
Anura	Dicroglossidae	Dicroglossinae	Nanorana		conaensis		Nanorana conaensis	Paa conaensis, Rana conaensis, Chaparana conaensis	Paa conaensis, Rana conaensis, Chaparana conaensis	Data Deficient (DD)	BT,CN		4862	https://amphibiaweb.org/species/4862
Anura	Dicroglossidae	Dicroglossinae	Nanorana		ercepeae		Nanorana ercepeae	Paa ercepeae, Rana ercepeae, Chaparana ercepeae	Paa ercepeae, Rana ercepeae, Chaparana ercepeae	Near Threatened (NT)	NP		4863	https://amphibiaweb.org/species/4863
Anura	Dicroglossidae	Dicroglossinae	Nanorana		feae		Nanorana feae	Paa feae, Rana feae, Gynandropaa feae	Paa feae, Rana feae, Gynandropaa feae	Data Deficient (DD)	MM,CN		4866	https://amphibiaweb.org/species/4866
Anura	Dicroglossidae	Dicroglossinae	Nanorana		gammii		Nanorana gammii	Paa gammii, Nanorana gammeii			IN		6889	https://amphibiaweb.org/species/6889
Anura	Dicroglossidae	Dicroglossinae	Nanorana		kangxianensis						CN		7674	https://amphibiaweb.org/species/7674
Anura	Dicroglossidae	Dicroglossinae	Nanorana		liebigii		Nanorana liebigii	Paa liebigii, Megalophrys gigas, Rana liebigii	Paa liebigii, Megalophrys gigas, Rana liebigii	Least Concern (LC)	BT,CN,IN,NP		4869	https://amphibiaweb.org/species/4869
Anura	Dicroglossidae	Dicroglossinae	Nanorana		maculosa		Nanorana maculosa	Paa maculosa, Rana maculosa, Chaparana maculosa	Paa maculosa, Rana maculosa, Chaparana maculosa	Endangered (EN)	CN		4871	https://amphibiaweb.org/species/4871
Anura	Dicroglossidae	Dicroglossinae	Nanorana		medogensis		Nanorana medogensis	Paa medogensis, Chaparana medogensis	Paa medogensis, Chaparana medogensis	Data Deficient (DD)	CN		6630	https://amphibiaweb.org/species/6630
Anura	Dicroglossidae	Dicroglossinae	Nanorana		minica		Nanorana minica	Microhyla minica, Paa minica, Chaparana minica, Rana minica	Paa minica, Chaparana minica, Rana minica	Vulnerable (VU)	IN		4872	https://amphibiaweb.org/species/4872
Anura	Dicroglossidae	Dicroglossinae	Nanorana		mokokchungensis		Nanorana mokokchungensis	Paa mokokchungensis, Scutiger mokokchungensis, Chaparana mokokchungensis	Paa mokokchungensis, Scutiger mokokchungensis, Chaparana mokokchungensis	Data Deficient (DD)	IN		5398	https://amphibiaweb.org/species/5398
Anura	Dicroglossidae	Dicroglossinae	Nanorana		parkeri	High Himalaya Frog	Nanorana parkeri			Least Concern (LC)	NP,CN		4829	https://amphibiaweb.org/species/4829
Anura	Dicroglossidae	Dicroglossinae	Nanorana		phrynoides						CN		8484	https://amphibiaweb.org/species/8484
Anura	Dicroglossidae	Dicroglossinae	Nanorana		pleskei	Tibetan frog	Nanorana pleskei			Near Threatened (NT)	BT,CN		4830	https://amphibiaweb.org/species/4830
Anura	Dicroglossidae	Dicroglossinae	Nanorana		polunini		Nanorana polunini	Paa polunini, Rana polunini, Chaparana polunini	Paa polunini, Rana polunini, Chaparana polunini	Least Concern (LC)	NP,CN		4873	https://amphibiaweb.org/species/4873
Anura	Dicroglossidae	Dicroglossinae	Nanorana		quadranus		Nanorana quadranus	Chaparana quadranus, Rana quadranus, Paa quadrana	Chaparana quadranus, Rana quadranus, Paa quadrana	Near Threatened (NT)	CN		7443	https://amphibiaweb.org/species/7443
Anura	Dicroglossidae	Dicroglossinae	Nanorana		rarica		Nanorana rarica	Paa rarica, Chaparana rarica, Rana rara	Paa rarica, Chaparana rarica, Rana rara	Data Deficient (DD)	NP		5852	https://amphibiaweb.org/species/5852
Anura	Dicroglossidae	Dicroglossinae	Nanorana		rostandi		Nanorana rostandi	Paa rostandi, Rana rostandi, Chaparana rostandi	Paa rostandi, Rana rostandi, Chaparana rostandi	Vulnerable (VU)	CN,NP		4875	https://amphibiaweb.org/species/4875
Anura	Dicroglossidae	Dicroglossinae	Nanorana		sichuanensis						CN		8472	https://amphibiaweb.org/species/8472
Anura	Dicroglossidae	Dicroglossinae	Nanorana		taihangnica		Nanorana taihangnica	Paa taihangnicus, Paa taihangnica, Chaparana taihangnica	Paa taihangnicus, Paa taihangnica, Chaparana taihangnica	Data Deficient (DD)	CN		6673	https://amphibiaweb.org/species/6673
Anura	Dicroglossidae	Dicroglossinae	Nanorana		unculuanus		Nanorana unculuanus	Chaparana unculuanus	Chaparana unculuanus	Endangered (EN)	CN		7441	https://amphibiaweb.org/species/7441
Anura	Dicroglossidae	Dicroglossinae	Nanorana		ventripunctata		Nanorana ventripunctata			Least Concern (LC)	CN		4831	https://amphibiaweb.org/species/4831
Anura	Dicroglossidae	Dicroglossinae	Nanorana		vicina	Murree HillÃ¢â‚¬â„¢s frog	Nanorana vicina	Paa vicina, Rana vicina, Chaparana vicina	Paa vicina, Rana vicina, Chaparana vicina	Least Concern (LC)	IN,PK		4879	https://amphibiaweb.org/species/4879
Anura	Dicroglossidae	Dicroglossinae	Nanorana		yunnanensis	Yunnan Spiny Frog	Nanorana yunnanensis	Paa bourreti, Paa liui, Paa yunnanensis	Paa bourreti, Paa liui, Paa yunnanensis	Endangered (EN)	VN,MM,CN		4880	https://amphibiaweb.org/species/4880
Anura	Dicroglossidae	Dicroglossinae	Nanorana		zhaoermii						CN		9028	https://amphibiaweb.org/species/9028
Anura	Dicroglossidae	Dicroglossinae	Ombrana		sikimensis	Sikkimese frog, Jerdon's Circular-flapped Frog	Ombrana sikimensis			Least Concern (LC)	IN,NP		8014	https://amphibiaweb.org/species/8014
Anura	Dicroglossidae	Dicroglossinae	Quasipaa		acanthophora		Quasipaa acanthophora			Vulnerable (VU)	VN		7439	https://amphibiaweb.org/species/7439
Anura	Dicroglossidae	Dicroglossinae	Quasipaa		boulengeri		Quasipaa boulengeri	Paa boulengeri, Paa robertingeri, Rana tibetana	Paa boulengeri, Paa robertingeri, Rana tibetana	Endangered (EN)	CN		4859	https://amphibiaweb.org/species/4859
Anura	Dicroglossidae	Dicroglossinae	Quasipaa		courtoisi			Paa spinosa, Rana spinosa, Rana duboisreymondi	Paa spinosa, Rana spinosa, Rana duboisreymondi		CN		7440	https://amphibiaweb.org/species/7440
Anura	Dicroglossidae	Dicroglossinae	Quasipaa		delacouri	Doi Chang Asian Frog, Tonkin Asian Frog		Quasipaa delacouri, Annandia delacouri, Chaparana delacouri, Rana microlineata, Paa microlineata	Chaparana delacouri, Rana microlineata, Paa microlineata	Data Deficient (DD)	LA,VN		7444	https://amphibiaweb.org/species/7444
Anura	Dicroglossidae	Dicroglossinae	Quasipaa		exilispinosa		Quasipaa exilispinosa	Paa exilispinosa, Rana exilispinosa, Nanorana exilispinosa	Paa exilispinosa, Rana exilispinosa, Nanorana exilispinosa	Vulnerable (VU)	HK,CN		4864	https://amphibiaweb.org/species/4864
Anura	Dicroglossidae	Dicroglossinae	Quasipaa		fasciculispina		Quasipaa fasciculispina	Paa fasciculispina, Rana fasciculispina, Nanorana fasciculispina	Paa fasciculispina, Rana fasciculispina, Nanorana fasciculispina	Vulnerable (VU)	KH,TH		4865	https://amphibiaweb.org/species/4865
Anura	Dicroglossidae	Dicroglossinae	Quasipaa		jiulongensis		Quasipaa jiulongensis	Nanorana jiulongensis, Paa jiulongensis, Rana jiulongensis	Paa jiulongensis, Rana jiulongensis, Nanorana jiulongensis	Vulnerable (VU)	CN		4868	https://amphibiaweb.org/species/4868
Anura	Dicroglossidae	Dicroglossinae	Quasipaa		shini		Quasipaa shini	Paa shini, Rana shini, Nanorana shini	Paa shini, Rana shini, Nanorana shini	Vulnerable (VU)	CN		4876	https://amphibiaweb.org/species/4876
Anura	Dicroglossidae	Dicroglossinae	Quasipaa		spinosa		Quasipaa spinosa	Paa spinosa, Rana spinosa, Rana duboisreymondi	Paa spinosa, Rana spinosa, Rana duboisreymondi	Vulnerable (VU)	CN,HK,VN		4877	https://amphibiaweb.org/species/4877
Anura	Dicroglossidae	Dicroglossinae	Quasipaa		verrucospinosa		Quasipaa verrucospinosa	Paa verrucospinosa	Paa verrucospinosa	Near Threatened (NT)	CN,LA,VN		5673	https://amphibiaweb.org/species/5673
Anura	Dicroglossidae	Dicroglossinae	Quasipaa		yei		Quasipaa yei	Paa yei, Nanorana yei, Yerana yei	Paa yei, Nanorana yei, Yerana yei	Data Deficient (DD)	CN		6279	https://amphibiaweb.org/species/6279
Anura	Dicroglossidae	Dicroglossinae	Sphaerotheca		breviceps	Burrowing frog	Sphaerotheca breviceps	Rana breviceps	Rana breviceps	Least Concern (LC)	BD,IN,MM,NP,PK		5197	https://amphibiaweb.org/species/5197
Anura	Dicroglossidae	Dicroglossinae	Sphaerotheca		dobsonii		Sphaerotheca dobsonii	Sphaerotheca dobsoni, Rana dobsonii, Tomopterna dobsonii	Sphaerotheca dobsoni, Rana dobsonii, Tomopterna dobsonii	Least Concern (LC)	IN		5968	https://amphibiaweb.org/species/5968
Anura	Dicroglossidae	Dicroglossinae	Sphaerotheca		leucorhynchus		Sphaerotheca leucorhynchus			Data Deficient (DD)	IN		5203	https://amphibiaweb.org/species/5203
Anura	Dicroglossidae	Dicroglossinae	Sphaerotheca		magadha	Magadha burrowing frog					IN		9067	https://amphibiaweb.org/species/9067
Anura	Dicroglossidae	Dicroglossinae	Sphaerotheca		maskeyi		Sphaerotheca maskeyi	Rana breviceps	Rana breviceps	Least Concern (LC)	NP		5777	https://amphibiaweb.org/species/5777
Anura	Dicroglossidae	Dicroglossinae	Sphaerotheca		pashchima						IN		8896	https://amphibiaweb.org/species/8896
Anura	Dicroglossidae	Dicroglossinae	Sphaerotheca		pluvialis						IN,LK		8897	https://amphibiaweb.org/species/8897
Anura	Dicroglossidae	Dicroglossinae	Sphaerotheca		rolandae	Marbled Sand Frog, Roland's Burrowing Frog	Sphaerotheca rolandae			Least Concern (LC)	IN,LK		5206	https://amphibiaweb.org/species/5206
Anura	Dicroglossidae	Dicroglossinae	Sphaerotheca		strachani		Sphaerotheca breviceps	Sphaerotheca breviceps		Least Concern (LC)	PK		5207	https://amphibiaweb.org/species/5207
Anura	Dicroglossidae	Dicroglossinae	Sphaerotheca		swani		Sphaerotheca swani	Rana breviceps	Rana breviceps	Data Deficient (DD)	NP		5208	https://amphibiaweb.org/species/5208
Anura	Dicroglossidae	Occidozyginae	Ingerana		borealis		Ingerana borealis			Vulnerable (VU)	BD,BT,CN,IN,MM,NP		4845	https://amphibiaweb.org/species/4845
Anura	Dicroglossidae	Occidozyginae	Ingerana		charlesdarwini		Ingerana charlesdarwini	Rana charlesdarwini	Rana charlesdarwini	Critically Endangered (CR)	IN		5504	https://amphibiaweb.org/species/5504
Anura	Dicroglossidae	Occidozyginae	Ingerana		tenasserimensis	Tenasserim Tricklefrog	Ingerana tenasserimensis			Least Concern (LC)	TH,MY,MM		4738	https://amphibiaweb.org/species/4738
Anura	Dicroglossidae	Occidozyginae	Occidozyga		baluensis		Occidozyga baluensis			Near Threatened (NT)	MY,ID		4844	https://amphibiaweb.org/species/4844
Anura	Dicroglossidae	Occidozyginae	Occidozyga		celebensis		Occidozyga celebensis			Least Concern (LC)	ID		4846	https://amphibiaweb.org/species/4846
Anura	Dicroglossidae	Occidozyginae	Occidozyga		diminutiva		Occidozyga diminutiva	Occidozyga diminutivus, Micrixalus diminutiva	Occidozyga diminutivus, Micrixalus diminutiva	Vulnerable (VU)	PH		4847	https://amphibiaweb.org/species/4847
Anura	Dicroglossidae	Occidozyginae	Occidozyga		floresiana		Occidozyga floresiana	Occidozyga floresianus, Oxydozyga floresiana, Phrynoglossus floresianus	Occidozyga floresianus, Oxydozyga floresiana, Phrynoglossus floresianus	Data Deficient (DD)	ID		4848	https://amphibiaweb.org/species/4848
Anura	Dicroglossidae	Occidozyginae	Occidozyga		laevis	Puddle Frog, Yellow-Bellied Puddle Frog	Occidozyga laevis			Least Concern (LC)	TH,PH,MY,ID		4849	https://amphibiaweb.org/species/4849
Anura	Dicroglossidae	Occidozyginae	Occidozyga		lima	Gray-green Puddlefrog	Occidozyga lima			Least Concern (LC)	KH,CN,HK,IN,ID,LA,MY,MM,TH,VN		4850	https://amphibiaweb.org/species/4850
Anura	Dicroglossidae	Occidozyginae	Occidozyga		magnapustulosa		Occidozyga magnapustulosa	Occidozyga magnapustulosus, Micrixalus magnapustulosus	Occidozyga magnapustulosus, Micrixalus magnapustulosus	Least Concern (LC)	TH		4851	https://amphibiaweb.org/species/4851
Anura	Dicroglossidae	Occidozyginae	Occidozyga		martensii	Malayan Puddlefrog	Occidozyga martensii			Least Concern (LC)	KH,CN,LA,MM,TH,VN		4852	https://amphibiaweb.org/species/4852
Anura	Dicroglossidae	Occidozyginae	Occidozyga		semipalmata		Occidozyga semipalmata	Occidozyga semipalmatus, Ooeidozyga semipalmata	Occidozyga semipalmatus, Ooeidozyga semipalmata	Least Concern (LC)	ID		4853	https://amphibiaweb.org/species/4853
Anura	Dicroglossidae	Occidozyginae	Occidozyga		sumatrana	Sumatran Puddle Frog	Occidozyga sumatrana			Least Concern (LC)	IN,ID		6844	https://amphibiaweb.org/species/6844
Anura	Dicroglossidae	Occidozyginae	Occidozyga		tompotika						ID		7749	https://amphibiaweb.org/species/7749
Anura	Dicroglossidae	Occidozyginae	Occidozyga		vittata		Occidozyga vittata	Occidozyga vittatus, Phrynoglossus vittatus	Occidozyga vittatus, Phrynoglossus vittatus	Least Concern (LC)	VN		4854	https://amphibiaweb.org/species/4854
Anura	Eleutherodactylidae	Eleutherodactylinae	Diasporus		amirae	AmiraÃ¢â‚¬â„¢s dink frog					CR		9007	https://amphibiaweb.org/species/9007
Anura	Eleutherodactylidae	Eleutherodactylinae	Diasporus		anthrax		Diasporus anthrax	Eleutherodactylus anthrax	Eleutherodactylus anthrax	Data Deficient (DD)	CO		5985	https://amphibiaweb.org/species/5985
Anura	Eleutherodactylidae	Eleutherodactylinae	Diasporus		citrinobapheus	Yellow Dyer Rainfrog				Least Concern (LC)	PA		7828	https://amphibiaweb.org/species/7828
Anura	Eleutherodactylidae	Eleutherodactylinae	Diasporus		darienensis	Darien dink frog					PA		8579	https://amphibiaweb.org/species/8579
Anura	Eleutherodactylidae	Eleutherodactylinae	Diasporus		diastema		Diasporus diastema	Eleutherodactylus diastema	Eleutherodactylus diastema	Least Concern (LC)	CO,CR,EC,HN,NI,PA		2890	https://amphibiaweb.org/species/2890
Anura	Eleutherodactylidae	Eleutherodactylinae	Diasporus		gularis		Diasporus gularis	Eleutherodactylus gularis	Eleutherodactylus gularis	Least Concern (LC)	EC,CO		2954	https://amphibiaweb.org/species/2954
Anura	Eleutherodactylidae	Eleutherodactylinae	Diasporus		hylaeformis		Diasporus hylaeformis	Eleutherodactylus hylaeformis	Eleutherodactylus hylaeformis	Least Concern (LC)	CR		2970	https://amphibiaweb.org/species/2970
Anura	Eleutherodactylidae	Eleutherodactylinae	Diasporus		igneus						PA		7887	https://amphibiaweb.org/species/7887
Anura	Eleutherodactylidae	Eleutherodactylinae	Diasporus		majeensis						PA		8580	https://amphibiaweb.org/species/8580
Anura	Eleutherodactylidae	Eleutherodactylinae	Diasporus		pequeno	Dink frog					PA		8581	https://amphibiaweb.org/species/8581
Anura	Eleutherodactylidae	Eleutherodactylinae	Diasporus		quidditus		Diasporus quidditus	Eleutherodactylus quidditus	Eleutherodactylus quidditus	Least Concern (LC)	CO,PA		5986	https://amphibiaweb.org/species/5986
Anura	Eleutherodactylidae	Eleutherodactylinae	Diasporus		sapo						PA		8582	https://amphibiaweb.org/species/8582
Anura	Eleutherodactylidae	Eleutherodactylinae	Diasporus		tigrillo		Diasporus tigrillo	Eleutherodactylus tigrillo	Eleutherodactylus tigrillo	Data Deficient (DD)	CR		5593	https://amphibiaweb.org/species/5593
Anura	Eleutherodactylidae	Eleutherodactylinae	Diasporus		tinker		Diasporus tinker	Eleutherodactylus tinker	Eleutherodactylus tinker	Least Concern (LC)	CO		5987	https://amphibiaweb.org/species/5987
Anura	Eleutherodactylidae	Eleutherodactylinae	Diasporus		ventrimaculatus		Diasporus ventrimaculatus			Vulnerable (VU)	CR		7286	https://amphibiaweb.org/species/7286
Anura	Eleutherodactylidae	Eleutherodactylinae	Diasporus		vocator		Diasporus vocator	Eleutherodactylus vocator	Eleutherodactylus vocator	Least Concern (LC)	CO,PA,CR		3280	https://amphibiaweb.org/species/3280
Anura	Eleutherodactylidae	Eleutherodactylinae	Eleutherodactylus	Eleutherodactylus	abbotti	Common Chirping Frog	Eleutherodactylus abbotti			Least Concern (LC)	DO,HT		2744	https://amphibiaweb.org/species/2744
Anura	Eleutherodactylidae	Eleutherodactylinae	Eleutherodactylus	Euhyas	acmonis	Cuban Red-rumped Frog	Eleutherodactylus acmonis			Endangered (EN)	CU		2748	https://amphibiaweb.org/species/2748
Anura	Eleutherodactylidae	Eleutherodactylinae	Eleutherodactylus	Euhyas	adelus	Cuban Dwarf Grassfrog	Eleutherodactylus adelus			Endangered (EN)	CU		6218	https://amphibiaweb.org/species/6218
Anura	Eleutherodactylidae	Eleutherodactylinae	Eleutherodactylus	Euhyas	albipes	Turquino White-footed Frog, Cuban Dwarf Robber Frog	Eleutherodactylus albipes			Critically Endangered (CR)	CU		2756	https://amphibiaweb.org/species/2756
Anura	Eleutherodactylidae	Eleutherodactylinae	Eleutherodactylus	Syrrhophus	albolabris		Eleutherodactylus dixoni	Eleutherodactylus dixoni, Tomodactylus albolabris, Syrrhophus albolabris	Tomodactylus albolabris, Syrrhophus albolabris, Eleutherodactylus albolabris	Critically Endangered (CR)	MX		6828	https://amphibiaweb.org/species/6828
Anura	Eleutherodactylidae	Eleutherodactylinae	Eleutherodactylus	Euhyas	alcoae	Barahona Rockfrog	Eleutherodactylus alcoae			Endangered (EN)	DO,HT		2757	https://amphibiaweb.org/species/2757
Anura	Eleutherodactylidae	Eleutherodactylinae	Eleutherodactylus	Euhyas	alticola	Jamaican Peak Frog	Eleutherodactylus alticola			Data Deficient (DD)	JM		2761	https://amphibiaweb.org/species/2761
Anura	Eleutherodactylidae	Eleutherodactylinae	Eleutherodactylus	Euhyas	amadeus	Macaya Bushfrog	Eleutherodactylus amadeus			Critically Endangered (CR)	HT		2762	https://amphibiaweb.org/species/2762
Anura	Eleutherodactylidae	Eleutherodactylinae	Eleutherodactylus	Eleutherodactylus	amplinympha	Dominica Frog	Eleutherodactylus amplinympha			Endangered (EN)	DM		2763	https://amphibiaweb.org/species/2763
Anura	Eleutherodactylidae	Eleutherodactylinae	Eleutherodactylus	Euhyas	andrewsi	Jamaican Rump-spotted Frog	Eleutherodactylus andrewsi			Endangered (EN)	JM		2768	https://amphibiaweb.org/species/2768
Anura	Eleutherodactylidae	Eleutherodactylinae	Eleutherodactylus	Syrrhophus	angustidigitorum		Eleutherodactylus angustidigitorum	Tomodactylus angustidigitorum	Tomodactylus angustidigitorum	Vulnerable (VU)	MX		2770	https://amphibiaweb.org/species/2770
Anura	Eleutherodactylidae	Eleutherodactylinae	Eleutherodactylus	Eleutherodactylus	antillensis	Puerto Rican Red-eyed Frog, CoquÃƒÂ­ ChurÃƒÂ­	Eleutherodactylus antillensis			Least Concern (LC)	PA,VI,VG,PR	PA	2775	https://amphibiaweb.org/species/2775
Anura	Eleutherodactylidae	Eleutherodactylinae	Eleutherodactylus	Pelorius	aporostegus	Tiburon Burrowing Frog					DO,HT		7120	https://amphibiaweb.org/species/7120
Anura	Eleutherodactylidae	Eleutherodactylinae	Eleutherodactylus	Euhyas	apostates	La Hotte Big-legged Frog	Eleutherodactylus apostates			Critically Endangered (CR)	HT		2778	https://amphibiaweb.org/species/2778
Anura	Eleutherodactylidae	Eleutherodactylinae	Eleutherodactylus	Euhyas	armstrongi	Baoruco Hammer Frog	Eleutherodactylus armstrongi			Endangered (EN)	DO,HT		2780	https://amphibiaweb.org/species/2780
Anura	Eleutherodactylidae	Eleutherodactylinae	Eleutherodactylus	Euhyas	atkinsi	Cuban Groin-spotted Frog, Ranita	Eleutherodactylus atkinsi			Least Concern (LC)	CU		2781	https://amphibiaweb.org/species/2781
Anura	Eleutherodactylidae	Eleutherodactylinae	Eleutherodactylus	Eleutherodactylus	audanti	South Island Telegraphic Frog	Eleutherodactylus audanti	Eleutherodactylus neodreptus	Eleutherodactylus neodreptus	Vulnerable (VU)	DO,HT		2783	https://amphibiaweb.org/species/2783
Anura	Eleutherodactylidae	Eleutherodactylinae	Eleutherodactylus	Eleutherodactylus	auriculatoides	Northern Hammer Frog	Eleutherodactylus auriculatoides			Endangered (EN)	DO		2785	https://amphibiaweb.org/species/2785
Anura	Eleutherodactylidae	Eleutherodactylinae	Eleutherodactylus	Eleutherodactylus	auriculatus	Cuban Telegraphic Frog, Eastern Cuba Robber Frog	Eleutherodactylus auriculatus			Least Concern (LC)	CU		2786	https://amphibiaweb.org/species/2786
Anura	Eleutherodactylidae	Eleutherodactylinae	Eleutherodactylus	Euhyas	bakeri	La Hotte Bushfrog	Eleutherodactylus bakeri			Critically Endangered (CR)	HT		2791	https://amphibiaweb.org/species/2791
Anura	Eleutherodactylidae	Eleutherodactylinae	Eleutherodactylus	Eleutherodactylus	barlagnei	Guadeloupe Streamfrog	Eleutherodactylus barlagnei			Endangered (EN)	GP		2793	https://amphibiaweb.org/species/2793
Anura	Eleutherodactylidae	Eleutherodactylinae	Eleutherodactylus	Eleutherodactylus	bartonsmithi	Boca de Yumuri Frog, Barton's Robber Frog; Ranita	Eleutherodactylus bartonsmithi			Critically Endangered (CR)	CU		2794	https://amphibiaweb.org/species/2794
Anura	Eleutherodactylidae	Eleutherodactylinae	Eleutherodactylus	Euhyas	beguei						CU		8343	https://amphibiaweb.org/species/8343
Anura	Eleutherodactylidae	Eleutherodactylinae	Eleutherodactylus	Euhyas	blairhedgesi	Canasi Frog	Eleutherodactylus blairhedgesi			Critically Endangered (CR)	CU		5732	https://amphibiaweb.org/species/5732
Anura	Eleutherodactylidae	Eleutherodactylinae	Eleutherodactylus	Pelorius	bothroboans	Cordillera Central Frog					DO,HT		7121	https://amphibiaweb.org/species/7121
Anura	Eleutherodactylidae	Eleutherodactylinae	Eleutherodactylus	Euhyas	bresslerae	Maisi Frog, Rio Yumuri Robber Frog	Eleutherodactylus bresslerae			Critically Endangered (CR)	CU		2813	https://amphibiaweb.org/species/2813
Anura	Eleutherodactylidae	Eleutherodactylinae	Eleutherodactylus	Euhyas	brevirostris	Short-nosed Green Frog, Short-snout Robber Frog	Eleutherodactylus brevirostris			Critically Endangered (CR)	HT		2815	https://amphibiaweb.org/species/2815
Anura	Eleutherodactylidae	Eleutherodactylinae	Eleutherodactylus	Eleutherodactylus	brittoni	Puerto Rican Grassfrog, Shrub CoquÃƒÂ­	Eleutherodactylus brittoni			Least Concern (LC)	PR		2817	https://amphibiaweb.org/species/2817
Anura	Eleutherodactylidae	Eleutherodactylinae	Eleutherodactylus	Euhyas	caribe	Haitian Marshfrog	Eleutherodactylus caribe			Critically Endangered (CR)	HT		2834	https://amphibiaweb.org/species/2834
Anura	Eleutherodactylidae	Eleutherodactylinae	Eleutherodactylus	Euhyas	casparii	Trinidad Flat-headed Frog	Eleutherodactylus casparii			Endangered (EN)	CU		5733	https://amphibiaweb.org/species/5733
Anura	Eleutherodactylidae	Eleutherodactylinae	Eleutherodactylus	Eleutherodactylus	cattus						CU		8570	https://amphibiaweb.org/species/8570
Anura	Eleutherodactylidae	Eleutherodactylinae	Eleutherodactylus	Euhyas	cavernicola	Portland Ridge Frog	Eleutherodactylus cavernicola			Critically Endangered (CR)	JM		2837	https://amphibiaweb.org/species/2837
Anura	Eleutherodactylidae	Eleutherodactylinae	Eleutherodactylus	Pelorius	chlorophenax	La Hotte Giant Frog	Eleutherodactylus chlorophenax			Critically Endangered (CR)	HT		2848	https://amphibiaweb.org/species/2848
[truncated: 6,223 more rows]
