# Supplementary material for: Gaps in global wildlife trade monitoring leave amphibians vulnerable
Source: eLife. 2021 Aug 12;10:e70086. doi: 10.7554/eLife.70086 (PMC8425949; doi:10.7554/eLife.70086)
Supplement: Source data 3. [file elife-70086-data3.csv]

sp	page	keyw	n	webID
Leptopelis nordequatorialis	1	Leptopelis nordequatorialis	1	web002
Bombina orientalis	1	Bombina orientalis	1	web002
Anaxyrus woodhousii	1	Anaxyrus woodhousii	1	web002
Melanophryniscus klappenbachi	1	Melanophryniscus klappenbachi	1	web002
Melanophryniscus stelzneri	1	Melanophryniscus stelzneri	1	web002
Ceratophrys cranwelli	1	Ceratophrys cranwelli	1	web002
Lepidobatrachus laevis	1	Lepidobatrachus laevis	1	web002
Dendrobates tinctorius	1	Dendrobates tinctorius	2	web002
Mantella baroni	1	Mantella baroni	1	web002
Mantella betsileo	1	Mantella betsileo	1	web002
Rana catesbeiana	1	Rana catesbeiana	2	web002
Rhacophorus reinwardtii	1	Rhacophorus reinwardtii	1	web002
Anaxyrus debilis	101	Anaxyrus debilis	1	web002
Megophrys montana	101	Megophrys montana	1	web002
Bombina orientalis	102	Bombina orientalis	1	web002
Anaxyrus debilis	102	Anaxyrus debilis	1	web002
Anaxyrus terrestris	102	Anaxyrus terrestris	1	web002
Anaxyrus woodhousii	102	Anaxyrus woodhousii	1	web002
Melanophryniscus klappenbachi	102	Melanophryniscus klappenbachi	1	web002
Bombina orientalis	104	Bombina orientalis	1	web002
Anaxyrus debilis	104	Anaxyrus debilis	1	web002
Anaxyrus terrestris	104	Anaxyrus terrestris	1	web002
Melanophryniscus klappenbachi	104	Melanophryniscus klappenbachi	1	web002
Rhinella marina	104	Rhinella marinus	1	web002
Hyla cinerea	108	Hyla cinerea	1	web002
Dendropsophus leucophyllatus	110	Hyla leucophyllata	1	web002
Hyla cinerea	110	Hyla cinerea	1	web002
Rhaebo guttatus	111	Bufo guttatus	1	web002
Rhinella marina	111	Bufo marinus	2	web002
Dendrobates auratus	111	Dendrobates auratus	1	web002
Hyla cinerea	111	Hyla cinerea	1	web002
Trachycephalus resinifictrix	111	Trachycephalus resinifictrix	1	web002
Litoria aurea	111	Litoria aurea	1	web002
Mantella aurantiaca	111	Mantella aurantiaca	1	web002
Scaphiophryne marmorata	111	Scaphiophryne marmorata	1	web002
Scaphiophryne obscura	111	Scaphiophryne	1	web002
Scaphiophryne verrucosa	111	Scaphiophryne	1	web002
Polypedates leucomystax	111	Polypedates leucomystax	1	web002
Polypedates teraiensis	111	Polypedates leucomystax	1	web002
Rhaebo guttatus	112	Bufo guttatus	1	web002
Rhinella marina	112	Bufo marinus	2	web002
Dendrobates auratus	112	Dendrobates auratus	1	web002
Hyla cinerea	112	Hyla cinerea	1	web002
Trachycephalus resinifictrix	112	Trachycephalus resinifictrix	1	web002
Litoria aurea	112	Litoria aurea	1	web002
Mantella aurantiaca	112	Mantella aurantiaca	1	web002
Scaphiophryne marmorata	112	Scaphiophryne marmorata	1	web002
Scaphiophryne obscura	112	Scaphiophryne	1	web002
Scaphiophryne verrucosa	112	Scaphiophryne	1	web002
Polypedates leucomystax	112	Polypedates leucomystax	1	web002
Polypedates teraiensis	112	Polypedates leucomystax	1	web002
Lepidobatrachus laevis	113	Lepidobatrachus laevis	1	web002
Bombina orientalis	114	Bombina orientalis	1	web002
Anaxyrus debilis	114	Anaxyrus debilis	1	web002
Anaxyrus woodhousii	114	Anaxyrus woodhousii	1	web002
Rhaebo guttatus	114	Bufo guttatus	1	web002
Rhinella marina	114	Rhinella marinus	1	web002
Bombina orientalis	115	Bombina orientalis	1	web002
Anaxyrus terrestris	115	Anaxyrus terrestris	1	web002
Anaxyrus woodhousii	115	Anaxyrus woodhousii	1	web002
Rhinella marina	115	Rhinella marinus	1	web002
Mantella aurantiaca	117	Mantella aurantiaca	1	web002
Mantella baroni	117	Mantella baroni	1	web002
Rhacophorus reinwardtii	117	Rhacophorus reinwardtii	1	web002
Hyla cinerea	118	Hyla cinerea	1	web002
Polypedates leucomystax	118	Polypedates leucomystax	1	web002
Polypedates teraiensis	118	Polypedates leucomystax	1	web002
Rhacophorus reinwardtii	118	Rhacophorus reinwardtii	1	web002
Dendrobates auratus	119	Dendrobates auratus	1	web002
Dendrobates tinctorius	119	Dendrobates tinctorius	1	web002
Hyla cinerea	119	Hyla cinerea	1	web002
Mantella baroni	119	Mantella baroni	1	web002
Leptopelis nordequatorialis	12	Leptopelis nordequatorialis	1	web002
Bombina orientalis	12	Bombina orientalis	1	web002
Anaxyrus woodhousii	12	Anaxyrus woodhousii	1	web002
Melanophryniscus klappenbachi	12	Melanophryniscus klappenbachi	1	web002
Melanophryniscus stelzneri	12	Melanophryniscus stelzneri	1	web002
Ceratophrys cranwelli	12	Ceratophrys cranwelli	1	web002
Lepidobatrachus laevis	12	Lepidobatrachus laevis	1	web002
Dendrobates tinctorius	12	Dendrobates tinctorius	2	web002
Mantella baroni	12	Mantella baroni	1	web002
Mantella betsileo	12	Mantella betsileo	1	web002
Rana catesbeiana	12	Rana catesbeiana	2	web002
Rhacophorus reinwardtii	12	Rhacophorus reinwardtii	1	web002
Bombina orientalis	121	Bombina orientalis	1	web002
Anaxyrus debilis	121	Anaxyrus debilis	1	web002
Dendrobates auratus	121	Dendrobates auratus	1	web002
Hyla cinerea	121	Hyla cinerea	1	web002
Litoria aurea	121	Litoria aurea	1	web002
Polypedates leucomystax	121	Polypedates leucomystax	1	web002
Polypedates teraiensis	121	Polypedates leucomystax	1	web002
Anaxyrus debilis	122	Anaxyrus debilis	1	web002
Melanophryniscus klappenbachi	122	Melanophryniscus klappenbachi	1	web002
Lepidobatrachus laevis	122	Lepidobatrachus laevis	1	web002
Scaphiophryne marmorata	122	Scaphiophryne marmorata	1	web002
Scaphiophryne obscura	122	Scaphiophryne	1	web002
Scaphiophryne verrucosa	122	Scaphiophryne	1	web002
Anaxyrus debilis	123	Anaxyrus debilis	1	web002
Lepidobatrachus laevis	123	Lepidobatrachus laevis	1	web002
Bombina orientalis	124	Bombina orientalis	1	web002
Anaxyrus debilis	124	Anaxyrus debilis	1	web002
Anaxyrus terrestris	124	Anaxyrus terrestris	1	web002
Anaxyrus woodhousii	124	Anaxyrus woodhousii	1	web002
Melanophryniscus klappenbachi	124	Melanophryniscus klappenbachi	1	web002
Rhinella marina	124	Bufo marinus	2	web002
Lepidobatrachus laevis	126	Lepidobatrachus laevis	1	web002
Dendropsophus leucophyllatus	126	Hyla leucophyllata	1	web002
Trachycephalus resinifictrix	126	Trachycephalus resinifictrix	1	web002
Leptopelis uluguruensis	127	Leptopelis uluguruensis	1	web002
Leptopelis vermiculatus	127	Leptopelis vermiculatus	1	web002
Anaxyrus terrestris	127	Anaxyrus terrestris	2	web002
Ceratophrys cranwelli	127	Ceratophrys cranwelli	1	web002
Ceratophrys ornata	127	Ceratophrys ornata	1	web002
Agalychnis callidryas	127	Agalychnis callidryas	1	web002
Mantella pulchra	127	Mantella pulchra	1	web002
Pyxicephalus adspersus	127	Pyxicephalus adspersus	1	web002
Theloderma corticale	127	Theloderma corticale	1	web002
Leptopelis uluguruensis	128	Leptopelis uluguruensis	1	web002
Leptopelis vermiculatus	128	Leptopelis vermiculatus	1	web002
Anaxyrus terrestris	128	Anaxyrus terrestris	2	web002
Ceratophrys cranwelli	128	Ceratophrys cranwelli	1	web002
Ceratophrys ornata	128	Ceratophrys ornata	1	web002
Agalychnis callidryas	128	Agalychnis callidryas	1	web002
Mantella pulchra	128	Mantella pulchra	1	web002
Pyxicephalus adspersus	128	Pyxicephalus adspersus	1	web002
Theloderma corticale	128	Theloderma corticale	1	web002
Lepidobatrachus laevis	129	Lepidobatrachus laevis	1	web002
Rhacophorus reinwardtii	129	Rhacophorus reinwardtii	1	web002
Leptopelis nordequatorialis	13	Leptopelis nordequatorialis	1	web002
Ceratophrys cranwelli	13	Ceratophrys cranwelli	1	web002
Lepidobatrachus laevis	13	Lepidobatrachus laevis	1	web002
Dendrobates tinctorius	13	Dendrobates tinctorius	2	web002
Mantella baroni	13	Mantella baroni	1	web002
Mantella betsileo	13	Mantella betsileo	1	web002
Kaloula pulchra	13	Kaloula pulchra	1	web002
Rana catesbeiana	13	Rana catesbeiana	2	web002
Rhacophorus reinwardtii	13	Rhacophorus reinwardtii	1	web002
Lepidobatrachus laevis	130	Lepidobatrachus laevis	1	web002
Hyla cinerea	130	Hyla cinerea	1	web002
Trachycephalus resinifictrix	130	Trachycephalus resinifictrix	1	web002
Theloderma corticale	130	Theloderma corticale	1	web002
Ceratophrys cranwelli	132	Ceratophrys cranwelli	1	web002
Ceratophrys ornata	132	Ceratophrys ornata	1	web002
Lepidobatrachus laevis	132	Lepidobatrachus laevis	1	web002
Ceratophrys cranwelli	134	Ceratophrys cranwelli	1	web002
Lepidobatrachus laevis	134	Lepidobatrachus laevis	1	web002
Leptopelis vermiculatus	136	Leptopelis vermiculatus	1	web002
Dendropsophus leucophyllatus	136	Hyla leucophyllata	1	web002
Hyla cinerea	136	Hyla cinerea	1	web002
Rhacophorus reinwardtii	136	Rhacophorus reinwardtii	1	web002
Lepidobatrachus laevis	137	Lepidobatrachus laevis	1	web002
Pyxicephalus adspersus	137	Pyxicephalus adspersus	1	web002
Leptopelis uluguruensis	139	Leptopelis uluguruensis	1	web002
Dendropsophus leucophyllatus	139	Hyla leucophyllata	1	web002
Rhacophorus reinwardtii	139	Rhacophorus reinwardtii	1	web002
Dendropsophus leucophyllatus	140	Hyla leucophyllata	1	web002
Hyla cinerea	140	Hyla cinerea	1	web002
Agalychnis callidryas	140	Agalychnis callidryas	1	web002
Phyllomedusa hypochondrialis	140	Phyllomedusa hypochondrialis	1	web002
Rhacophorus reinwardtii	140	Rhacophorus reinwardtii	1	web002
Dendropsophus leucophyllatus	141	Hyla leucophyllata	1	web002
Hyla cinerea	141	Hyla cinerea	1	web002
Lepidobatrachus laevis	142	Lepidobatrachus laevis	1	web002
Bombina orientalis	143	Bombina orientalis	1	web002
Anaxyrus debilis	143	Anaxyrus debilis	1	web002
Anaxyrus terrestris	143	Anaxyrus terrestris	2	web002
Anaxyrus woodhousii	143	Anaxyrus woodhousii	1	web002
Melanophryniscus klappenbachi	143	Melanophryniscus klappenbachi	1	web002
Rhinella marina	143	Rhinella marinus	1	web002
Mantella baroni	145	Mantella baroni	1	web002
Mantella pulchra	145	Mantella pulchra	1	web002
Dendrobates leucomelas	146	Dendrobates leucomelas	1	web002
Phyllomedusa hypochondrialis	146	Phyllomedusa hypochondrialis	1	web002
Phyllomedusa tomopterna	146	Phyllomedusa tomopterna	1	web002
Dyscophus guineti	146	Dyscophus guineti	1	web002
Zhangixalus dennysi	146	Rhacophorus dennysi	1	web002
Ambystoma maculatum	146	Ambystoma maculatum	1	web002
Dendrobates leucomelas	147	Dendrobates leucomelas	1	web002
Phyllomedusa hypochondrialis	147	Phyllomedusa hypochondrialis	1	web002
Phyllomedusa tomopterna	147	Phyllomedusa tomopterna	1	web002
Dyscophus guineti	147	Dyscophus guineti	1	web002
Zhangixalus dennysi	147	Rhacophorus dennysi	1	web002
Ambystoma maculatum	147	Ambystoma maculatum	1	web002
Bombina orientalis	148	Bombina orientalis	1	web002
Anaxyrus debilis	148	Anaxyrus debilis	1	web002
Lepidobatrachus laevis	148	Lepidobatrachus laevis	1	web002
Ambystoma maculatum	148	Ambystoma maculatum	1	web002
Anaxyrus debilis	149	Anaxyrus debilis	1	web002
Ambystoma maculatum	15	Ambystoma maculatum	1	web002
Agalychnis callidryas	150	Agalychnis callidryas	1	web002
Phyllomedusa hypochondrialis	150	Phyllomedusa hypochondrialis	1	web002
Phyllomedusa tomopterna	150	Phyllomedusa tomopterna	1	web002
Rhacophorus reinwardtii	150	Rhacophorus reinwardtii	1	web002
Lepidobatrachus laevis	152	Lepidobatrachus laevis	1	web002
Dyscophus guineti	152	Dyscophus guineti	1	web002
Polypedates leucomystax	154	Polypedates leucomystax	1	web002
Polypedates teraiensis	154	Polypedates leucomystax	1	web002
Rhacophorus reinwardtii	154	Rhacophorus reinwardtii	1	web002
Zhangixalus dennysi	154	Rhacophorus dennysi	1	web002
Phyllomedusa hypochondrialis	155	Phyllomedusa hypochondrialis	1	web002
Rhacophorus reinwardtii	155	Rhacophorus reinwardtii	1	web002
Melanophryniscus klappenbachi	156	Melanophryniscus klappenbachi	1	web002
Dendrobates auratus	156	Dendrobates auratus	1	web002
Dendrobates leucomelas	156	Dendrobates leucomelas	1	web002
Dendrobates tinctorius	156	Dendrobates tinctorius	1	web002
Mantella baroni	156	Mantella baroni	1	web002
Bombina orientalis	16	Bombina orientalis	1	web002
Anaxyrus debilis	16	Anaxyrus debilis	1	web002
Anaxyrus terrestris	16	Anaxyrus terrestris	2	web002
Anaxyrus woodhousii	16	Anaxyrus woodhousii	1	web002
Melanophryniscus klappenbachi	16	Melanophryniscus klappenbachi	1	web002
Melanophryniscus stelzneri	16	Melanophryniscus stelzneri	1	web002
Rhaebo guttatus	16	Bufo guttatus	1	web002
Rhinella marina	16	Bufo marinus	2	web002
Leptopelis nordequatorialis	18	Leptopelis nordequatorialis	1	web002
Bombina orientalis	18	Bombina orientalis	1	web002
Anaxyrus woodhousii	18	Anaxyrus woodhousii	1	web002
Melanophryniscus klappenbachi	18	Melanophryniscus klappenbachi	1	web002
Melanophryniscus stelzneri	18	Melanophryniscus stelzneri	1	web002
Ceratophrys cranwelli	18	Ceratophrys cranwelli	1	web002
Lepidobatrachus laevis	18	Lepidobatrachus laevis	1	web002
Dendrobates tinctorius	18	Dendrobates tinctorius	2	web002
Mantella baroni	18	Mantella baroni	1	web002
Mantella betsileo	18	Mantella betsileo	1	web002
Rana catesbeiana	18	Rana catesbeiana	2	web002
Rhacophorus reinwardtii	18	Rhacophorus reinwardtii	1	web002
Leptopelis nordequatorialis	2	Leptopelis nordequatorialis	1	web002
Bombina orientalis	2	Bombina orientalis	1	web002
Anaxyrus woodhousii	2	Anaxyrus woodhousii	1	web002
Melanophryniscus klappenbachi	2	Melanophryniscus klappenbachi	1	web002
Melanophryniscus stelzneri	2	Melanophryniscus stelzneri	1	web002
Ceratophrys cranwelli	2	Ceratophrys cranwelli	1	web002
Lepidobatrachus laevis	2	Lepidobatrachus laevis	1	web002
Dendrobates tinctorius	2	Dendrobates tinctorius	2	web002
Mantella baroni	2	Mantella baroni	1	web002
Mantella betsileo	2	Mantella betsileo	1	web002
Rana catesbeiana	2	Rana catesbeiana	2	web002
Rhacophorus reinwardtii	2	Rhacophorus reinwardtii	1	web002
Bombina orientalis	3	Bombina orientalis	1	web002
Anaxyrus debilis	3	Anaxyrus debilis	1	web002
Ceratophrys cranwelli	3	Ceratophrys cranwelli	1	web002
Dendrobates tinctorius	3	Dendrobates tinctorius	1	web002
Dendropsophus leucophyllatus	3	Hyla leucophyllata	1	web002
Osteopilus septentrionalis	3	Osteopilus septentrionalis	1	web002
Litoria caerulea	3	Litoria caerulea	1	web002
Mantella laevigata	3	Mantella laevigata	1	web002
Megophrys montana	3	Megophrys montana	1	web002
Dermatonotus muelleri	3	Dermatonotus muelleri	1	web002
Kaloula pulchra	3	Kaloula pulchra	1	web002
Rhaebo guttatus	4	Bufo guttatus	1	web002
Rhinella marina	4	Bufo marinus	2	web002
Dendrobates auratus	4	Dendrobates auratus	1	web002
Hyla cinerea	4	Hyla cinerea	1	web002
Trachycephalus resinifictrix	4	Trachycephalus resinifictrix	1	web002
Litoria aurea	4	Litoria aurea	1	web002
Mantella aurantiaca	4	Mantella aurantiaca	1	web002
Scaphiophryne marmorata	4	Scaphiophryne marmorata	1	web002
Scaphiophryne obscura	4	Scaphiophryne	1	web002
Scaphiophryne verrucosa	4	Scaphiophryne	1	web002
Polypedates leucomystax	4	Polypedates leucomystax	1	web002
Polypedates teraiensis	4	Polypedates leucomystax	1	web002
Leptopelis uluguruensis	5	Leptopelis uluguruensis	1	web002
Leptopelis vermiculatus	5	Leptopelis vermiculatus	1	web002
Anaxyrus terrestris	5	Anaxyrus terrestris	2	web002
Ceratophrys cranwelli	5	Ceratophrys cranwelli	1	web002
Ceratophrys ornata	5	Ceratophrys ornata	1	web002
Agalychnis callidryas	5	Agalychnis callidryas	1	web002
Mantella pulchra	5	Mantella pulchra	1	web002
Pyxicephalus adspersus	5	Pyxicephalus adspersus	1	web002
Theloderma corticale	5	Theloderma corticale	1	web002
Bombina orientalis	55	Bombina orientalis	1	web002
Anaxyrus woodhousii	55	Anaxyrus woodhousii	1	web002
Lepidobatrachus laevis	55	Lepidobatrachus laevis	1	web002
Rana catesbeiana	55	Rana catesbeiana	2	web002
Bombina orientalis	57	Bombina orientalis	1	web002
Anaxyrus woodhousii	57	Anaxyrus woodhousii	1	web002
Melanophryniscus klappenbachi	57	Melanophryniscus klappenbachi	1	web002
Rhinella marina	57	Rhinella marinus	1	web002
Rana catesbeiana	57	Lithobates catesbeianus	1	web002
Ceratophrys cranwelli	58	Ceratophrys cranwelli	1	web002
Lepidobatrachus laevis	58	Lepidobatrachus laevis	1	web002
Leptopelis nordequatorialis	59	Leptopelis nordequatorialis	1	web002
Bombina orientalis	59	Bombina orientalis	1	web002
Anaxyrus woodhousii	59	Anaxyrus woodhousii	1	web002
Melanophryniscus klappenbachi	59	Melanophryniscus klappenbachi	1	web002
Melanophryniscus stelzneri	59	Melanophryniscus stelzneri	1	web002
Ceratophrys cranwelli	59	Ceratophrys cranwelli	1	web002
Lepidobatrachus laevis	59	Lepidobatrachus laevis	1	web002
Dendrobates tinctorius	59	Dendrobates tinctorius	2	web002
Mantella baroni	59	Mantella baroni	1	web002
Mantella betsileo	59	Mantella betsileo	1	web002
Rana catesbeiana	59	Rana catesbeiana	2	web002
Rhacophorus reinwardtii	59	Rhacophorus reinwardtii	1	web002
Dendrobates leucomelas	6	Dendrobates leucomelas	1	web002
Phyllomedusa hypochondrialis	6	Phyllomedusa hypochondrialis	1	web002
Phyllomedusa tomopterna	6	Phyllomedusa tomopterna	1	web002
Dyscophus guineti	6	Dyscophus guineti	1	web002
Zhangixalus dennysi	6	Rhacophorus dennysi	1	web002
Ambystoma maculatum	6	Ambystoma maculatum	1	web002
Leptopelis nordequatorialis	60	Leptopelis nordequatorialis	1	web002
Bombina orientalis	60	Bombina orientalis	1	web002
Anaxyrus woodhousii	60	Anaxyrus woodhousii	1	web002
Melanophryniscus klappenbachi	60	Melanophryniscus klappenbachi	1	web002
Melanophryniscus stelzneri	60	Melanophryniscus stelzneri	1	web002
Ceratophrys cranwelli	60	Ceratophrys cranwelli	1	web002
Lepidobatrachus laevis	60	Lepidobatrachus laevis	1	web002
Dendrobates tinctorius	60	Dendrobates tinctorius	2	web002
Mantella baroni	60	Mantella baroni	1	web002
Mantella betsileo	60	Mantella betsileo	1	web002
Rana catesbeiana	60	Rana catesbeiana	2	web002
Rhacophorus reinwardtii	60	Rhacophorus reinwardtii	1	web002
Leptopelis nordequatorialis	61	Leptopelis nordequatorialis	1	web002
Bombina orientalis	61	Bombina orientalis	1	web002
Anaxyrus woodhousii	61	Anaxyrus woodhousii	1	web002
Melanophryniscus klappenbachi	61	Melanophryniscus klappenbachi	1	web002
Melanophryniscus stelzneri	61	Melanophryniscus stelzneri	1	web002
Ceratophrys cranwelli	61	Ceratophrys cranwelli	1	web002
Lepidobatrachus laevis	61	Lepidobatrachus laevis	1	web002
Dendrobates tinctorius	61	Dendrobates tinctorius	2	web002
Mantella baroni	61	Mantella baroni	1	web002
Mantella betsileo	61	Mantella betsileo	1	web002
Rana catesbeiana	61	Rana catesbeiana	2	web002
Rhacophorus reinwardtii	61	Rhacophorus reinwardtii	1	web002
Leptopelis nordequatorialis	63	Leptopelis nordequatorialis	1	web002
Bombina orientalis	63	Bombina orientalis	1	web002
Anaxyrus woodhousii	63	Anaxyrus woodhousii	1	web002
Melanophryniscus klappenbachi	63	Melanophryniscus klappenbachi	1	web002
Melanophryniscus stelzneri	63	Melanophryniscus stelzneri	1	web002
Ceratophrys cranwelli	63	Ceratophrys cranwelli	1	web002
Lepidobatrachus laevis	63	Lepidobatrachus laevis	1	web002
Dendrobates tinctorius	63	Dendrobates tinctorius	2	web002
Mantella baroni	63	Mantella baroni	1	web002
Mantella betsileo	63	Mantella betsileo	1	web002
Rana catesbeiana	63	Rana catesbeiana	2	web002
Rhacophorus reinwardtii	63	Rhacophorus reinwardtii	1	web002
Leptopelis nordequatorialis	64	Leptopelis nordequatorialis	1	web002
Bombina orientalis	64	Bombina orientalis	1	web002
Anaxyrus woodhousii	64	Anaxyrus woodhousii	1	web002
Melanophryniscus klappenbachi	64	Melanophryniscus klappenbachi	1	web002
Melanophryniscus stelzneri	64	Melanophryniscus stelzneri	1	web002
Ceratophrys cranwelli	64	Ceratophrys cranwelli	1	web002
Lepidobatrachus laevis	64	Lepidobatrachus laevis	1	web002
Dendrobates tinctorius	64	Dendrobates tinctorius	2	web002
Mantella baroni	64	Mantella baroni	1	web002
Mantella betsileo	64	Mantella betsileo	1	web002
Rana catesbeiana	64	Rana catesbeiana	2	web002
Rhacophorus reinwardtii	64	Rhacophorus reinwardtii	1	web002
Hyla cinerea	69	Hyla cinerea	1	web002
Leptopelis nordequatorialis	7	Leptopelis nordequatorialis	1	web002
Bombina orientalis	7	Bombina orientalis	1	web002
Anaxyrus woodhousii	7	Anaxyrus woodhousii	1	web002
Melanophryniscus klappenbachi	7	Melanophryniscus klappenbachi	1	web002
Melanophryniscus stelzneri	7	Melanophryniscus stelzneri	1	web002
Ceratophrys cranwelli	7	Ceratophrys cranwelli	1	web002
Lepidobatrachus laevis	7	Lepidobatrachus laevis	1	web002
Dendrobates tinctorius	7	Dendrobates tinctorius	2	web002
Mantella baroni	7	Mantella baroni	1	web002
Mantella betsileo	7	Mantella betsileo	1	web002
Rana catesbeiana	7	Rana catesbeiana	2	web002
Rhacophorus reinwardtii	7	Rhacophorus reinwardtii	1	web002
Leptopelis nordequatorialis	72	Leptopelis nordequatorialis	1	web002
Bombina orientalis	72	Bombina orientalis	1	web002
Anaxyrus woodhousii	72	Anaxyrus woodhousii	1	web002
Melanophryniscus klappenbachi	72	Melanophryniscus klappenbachi	1	web002
Melanophryniscus stelzneri	72	Melanophryniscus stelzneri	1	web002
Ceratophrys cranwelli	72	Ceratophrys cranwelli	1	web002
Lepidobatrachus laevis	72	Lepidobatrachus laevis	1	web002
Dendrobates tinctorius	72	Dendrobates tinctorius	2	web002
Mantella baroni	72	Mantella baroni	1	web002
Mantella betsileo	72	Mantella betsileo	1	web002
Rana catesbeiana	72	Rana catesbeiana	2	web002
Rhacophorus reinwardtii	72	Rhacophorus reinwardtii	1	web002
Leptopelis nordequatorialis	73	Leptopelis nordequatorialis	1	web002
Bombina orientalis	73	Bombina orientalis	1	web002
Anaxyrus woodhousii	73	Anaxyrus woodhousii	1	web002
Melanophryniscus klappenbachi	73	Melanophryniscus klappenbachi	1	web002
Melanophryniscus stelzneri	73	Melanophryniscus stelzneri	1	web002
Ceratophrys cranwelli	73	Ceratophrys cranwelli	1	web002
Lepidobatrachus laevis	73	Lepidobatrachus laevis	1	web002
Dendrobates tinctorius	73	Dendrobates tinctorius	2	web002
Mantella baroni	73	Mantella baroni	1	web002
Mantella betsileo	73	Mantella betsileo	1	web002
Rana catesbeiana	73	Rana catesbeiana	2	web002
Rhacophorus reinwardtii	73	Rhacophorus reinwardtii	1	web002
Bombina orientalis	75	Bombina orientalis	1	web002
Anaxyrus debilis	75	Anaxyrus debilis	1	web002
Anaxyrus terrestris	75	Anaxyrus terrestris	1	web002
Anaxyrus woodhousii	75	Anaxyrus woodhousii	1	web002
Melanophryniscus klappenbachi	75	Melanophryniscus klappenbachi	1	web002
Dendrobates tinctorius	76	Dendrobates tinctorius	1	web002
Mantella baroni	76	Mantella baroni	1	web002
Rhacophorus reinwardtii	76	Rhacophorus reinwardtii	1	web002
Hyla cinerea	77	Hyla cinerea	1	web002
Mantella baroni	77	Mantella baroni	1	web002
Mantella betsileo	77	Mantella betsileo	1	web002
Leptopelis nordequatorialis	78	Leptopelis nordequatorialis	1	web002
Hyla cinerea	78	Hyla cinerea	1	web002
Rhacophorus reinwardtii	78	Rhacophorus reinwardtii	1	web002
Dendrobates auratus	79	Dendrobates auratus	1	web002
Dendrobates tinctorius	79	Dendrobates tinctorius	2	web002
Mantella baroni	79	Mantella baroni	1	web002
Rhacophorus reinwardtii	79	Rhacophorus reinwardtii	1	web002
Phyllomedusa hypochondrialis	81	Phyllomedusa hypochondrialis	1	web002
Mantella baroni	81	Mantella baroni	1	web002
Rhacophorus reinwardtii	81	Rhacophorus reinwardtii	1	web002
Lepidobatrachus laevis	82	Lepidobatrachus laevis	1	web002
Lepidobatrachus laevis	83	Lepidobatrachus laevis	1	web002
Bombina orientalis	84	Bombina orientalis	1	web002
Anaxyrus debilis	84	Anaxyrus debilis	1	web002
Anaxyrus terrestris	84	Anaxyrus terrestris	1	web002
Anaxyrus woodhousii	84	Anaxyrus woodhousii	1	web002
Melanophryniscus klappenbachi	84	Melanophryniscus klappenbachi	1	web002
Melanophryniscus stelzneri	84	Melanophryniscus stelzneri	1	web002
Rhinella marina	84	Rhinella marinus	1	web002
Bombina orientalis	85	Bombina orientalis	1	web002
Anaxyrus debilis	85	Anaxyrus debilis	1	web002
Ceratophrys cranwelli	85	Ceratophrys cranwelli	1	web002
Dendrobates tinctorius	85	Dendrobates tinctorius	1	web002
Dendropsophus leucophyllatus	85	Hyla leucophyllata	1	web002
Osteopilus septentrionalis	85	Osteopilus septentrionalis	1	web002
Litoria caerulea	85	Litoria caerulea	1	web002
Mantella laevigata	85	Mantella laevigata	1	web002
Megophrys montana	85	Megophrys montana	1	web002
Dermatonotus muelleri	85	Dermatonotus muelleri	1	web002
Kaloula pulchra	85	Kaloula pulchra	1	web002
Bombina orientalis	86	Bombina orientalis	1	web002
Anaxyrus debilis	86	Anaxyrus debilis	1	web002
Ceratophrys cranwelli	86	Ceratophrys cranwelli	1	web002
Dendrobates tinctorius	86	Dendrobates tinctorius	1	web002
Dendropsophus leucophyllatus	86	Hyla leucophyllata	1	web002
Osteopilus septentrionalis	86	Osteopilus septentrionalis	1	web002
Litoria caerulea	86	Litoria caerulea	1	web002
Mantella laevigata	86	Mantella laevigata	1	web002
Megophrys montana	86	Megophrys montana	1	web002
Dermatonotus muelleri	86	Dermatonotus muelleri	1	web002
Kaloula pulchra	86	Kaloula pulchra	1	web002
Ceratophrys cranwelli	87	Ceratophrys cranwelli	1	web002
Ceratophrys ornata	87	Ceratophrys ornata	1	web002
Lepidobatrachus laevis	87	Lepidobatrachus laevis	1	web002
Lepidobatrachus laevis	89	Lepidobatrachus laevis	1	web002
Kaloula pulchra	89	Kaloula pulchra	1	web002
Dendrobates auratus	91	Dendrobates auratus	1	web002
Dendrobates tinctorius	91	Dendrobates tinctorius	1	web002
Dendropsophus leucophyllatus	91	Hyla leucophyllata	1	web002
Mantella baroni	91	Mantella baroni	1	web002
Anaxyrus woodhousii	93	Anaxyrus woodhousii	1	web002
Mantella baroni	93	Mantella baroni	1	web002
Mantella laevigata	93	Mantella laevigata	1	web002
Rhacophorus reinwardtii	93	Rhacophorus reinwardtii	1	web002
Dendropsophus leucophyllatus	94	Hyla leucophyllata	1	web002
Hyla cinerea	94	Hyla cinerea	1	web002
Mantella baroni	94	Mantella baroni	1	web002
Rhacophorus reinwardtii	94	Rhacophorus reinwardtii	1	web002
Hyla cinerea	95	Hyla cinerea	1	web002
Osteopilus septentrionalis	95	Osteopilus septentrionalis	1	web002
Litoria aurea	95	Litoria aurea	1	web002
Lepidobatrachus laevis	97	Lepidobatrachus laevis	1	web002
Dermatonotus muelleri	97	Dermatonotus muelleri	1	web002
Lepidobatrachus laevis	98	Lepidobatrachus laevis	1	web002
Hyla cinerea	98	Hyla cinerea	1	web002
Litoria caerulea	98	Litoria caerulea	1	web002
Lepidobatrachus laevis	99	Lepidobatrachus laevis	1	web002
Trachycephalus resinifictrix	99	Trachycephalus resinifictrix	1	web002
Litoria caerulea	99	Litoria caerulea	1	web002
Ameerega trivittata	2	Ameerega trivittata	1	web003
Adelphobates galactonotus	2	Adelphobates galactonotus	2	web003
Dendrobates auratus	2	Dendrobates auratus	1	web003
Dendrobates tinctorius	2	Dendrobates tinctorius	2	web003
Oophaga pumilio	2	Oophaga pumilio	1	web003
Atelopus barbotini	3	Atelopus barbotini	1	web003
Pleurodema brachyops	3	Pleurodema brachyops	1	web003
Mantella baroni	3	Mantella baroni	1	web003
Mantella expectata	3	Mantella expectata	1	web003
Mantella nigricans	3	Mantella nigricans	1	web003
Dyscophus guineti	3	Dyscophus guineti	1	web003
Pipa pipa	3	Pipa pipa	1	web003
Ameerega trivittata	37	Ameerega trivittata	1	web003
Adelphobates galactonotus	37	Adelphobates galactonotus	2	web003
Dendrobates auratus	37	Dendrobates auratus	1	web003
Dendrobates tinctorius	37	Dendrobates tinctorius	2	web003
Oophaga pumilio	37	Oophaga pumilio	1	web003
Ameerega trivittata	38	Ameerega trivittata	1	web003
Adelphobates galactonotus	38	Adelphobates galactonotus	2	web003
Dendrobates auratus	38	Dendrobates auratus	1	web003
Dendrobates tinctorius	38	Dendrobates tinctorius	2	web003
Oophaga pumilio	38	Oophaga pumilio	1	web003
Ameerega trivittata	39	Ameerega trivittata	1	web003
Adelphobates galactonotus	39	Adelphobates galactonotus	2	web003
Dendrobates auratus	39	Dendrobates auratus	1	web003
Dendrobates tinctorius	39	Dendrobates tinctorius	2	web003
Oophaga pumilio	39	Oophaga pumilio	1	web003
Pleurodeles waltl	4	Pleurodeles waltl	1	web003
Adelphobates galactonotus	40	Dendrobates galactonotus	1	web003
Dendrobates tinctorius	40	Dendrobates tinctorius	1	web003
Dendrobates tinctorius	41	Dendrobates tinctorius	1	web003
Dendrobates auratus	42	Dendrobates auratus	1	web003
Dendrobates tinctorius	42	Dendrobates tinctorius	2	web003
Ameerega trivittata	43	Ameerega trivittata	1	web003
Adelphobates galactonotus	43	Adelphobates galactonotus	2	web003
Dendrobates auratus	43	Dendrobates auratus	1	web003
Dendrobates tinctorius	43	Dendrobates tinctorius	2	web003
Oophaga pumilio	43	Oophaga pumilio	1	web003
Dendrobates auratus	44	Dendrobates auratus	1	web003
Dendrobates tinctorius	44	Dendrobates tinctorius	2	web003
Oophaga pumilio	44	Oophaga pumilio	1	web003
Agalychnis callidryas	44	Agalychnis callidryas	1	web003
Atelopus barbotini	45	Atelopus barbotini	1	web003
Pleurodema brachyops	45	Pleurodema brachyops	1	web003
Mantella baroni	45	Mantella baroni	1	web003
Mantella expectata	45	Mantella expectata	1	web003
Mantella nigricans	45	Mantella nigricans	1	web003
Dyscophus guineti	45	Dyscophus guineti	1	web003
Pipa pipa	45	Pipa pipa	1	web003
Ambystoma maculatum	5	Ambystoma maculatum	1	web003
Ambystoma opacum	5	Ambystoma opacum	1	web003
Ambystoma tigrinum	5	Ambystoma tigrinum	1	web003
Desmognathus fuscus	5	Desmognathus fuscus	1	web003
Plethodon glutinosus	5	Plethodon glutinosus	1	web003
Bombina bombina	6	Bombina bombina	1	web003
Bombina orientalis	6	Bombina orientalis	1	web003
Anaxyrus cognatus	6	Anaxyrus cognatus	1	web003
Anaxyrus quercicus	6	Anaxyrus quercicus	1	web003
Anaxyrus retiformis	6	Bufo retiformis	1	web003
Duttaphrynus melanostictus	6	Duttaphrynus melanostictus	1	web003
Incilius alvarius	6	Incilius alvarius	1	web003
Incilius valliceps	6	Incilius valliceps	1	web003
Melanophryniscus stelzneri	6	Melanophryniscus stelzneri	1	web003
Rhinella lescurei	6	Rhinella lescurei	1	web003
Rhinella margaritifera	6	Rhinella margaritifera	1	web003
Rhinella marina	6	Rhinella marina	2	web003
Hoplobatrachus tigerinus	6	Bufo typhonius	1	web003
Boana calcarata	7	Hypsiboas calcaratus	1	web003
Boana crepitans	7	Hypsiboas crepitans	1	web003
Dendropsophus leucophyllatus	7	Hyla leucophyllata	1	web003
Dendropsophus marmoratus	7	Hyla marmorata	1	web003
Dendropsophus reticulatus	7	Dendropsophus reticulatus	1	web003
Hyla cinerea	7	Hyla cinerea	1	web003
Hyla gratiosa	7	Hyla gratiosa	1	web003
Hyla versicolor	7	Hyla versicolor	1	web003
Osteopilus septentrionalis	7	Osteopilus septentrionalis	1	web003
Smilisca phaeota	7	Smilisca phaeota	1	web003
Sphaenorhynchus lacteus	7	Sphaenorhynchus lacteus	1	web003
Litoria caerulea	7	Litoria caerulea	1	web003
Litoria infrafrenata	7	Litoria infrafrenata	1	web003
Agalychnis callidryas	7	Agalychnis callidryas	1	web003
Cruziohyla craspedopus	7	Cruziohyla craspedopus	1	web003
Phyllomedusa bicolor	7	Phyllomedusa bicolor	1	web003
Phyllomedusa hypochondrialis	7	Phyllomedusa hypochondrialis	1	web003
Phyllomedusa tomopterna	7	Phyllomedusa tomopterna	1	web003
Polypedates otilophus	7	Polypedates otilophus	1	web003
Theloderma corticale	7	Theloderma corticale	1	web003
Ceratophrys aurita	8	Ceratophrys aurita	1	web003
Ceratophrys cranwelli	8	Ceratophrys cranwelli	1	web003
Ceratophrys stolzmanni	8	Ceratophrys stolzmanni	1	web003
Rana catesbeiana	2	Lithobates catesbeianus	1	web004
Adelphobates galactonotus	2	Adelphobates galactonotus	1	web005
Oophaga pumilio	2	Oophaga pumilio	1	web005
Ranitomeya imitator	2	Ranitomeya imitator	1	web005
Ceratophrys cornuta	3	Ceratophrys cornuta	1	web005
Ceratophrys cranwelli	3	Ceratophrys cranwelli	1	web005
Hyla cinerea	3	Hyla cinerea	1	web005
Osteopilus septentrionalis	3	Osteopilus septentrionalis	1	web005
Litoria caerulea	3	Litoria caerulea	1	web005
Agalychnis callidryas	3	Agalychnis callidryas	1	web005
Ranitomeya amazonica	101	Ranitomeya amazonica	1	web006
Necturus beyeri	102	Necturus beyeri	1	web006
Dendropsophus reticulatus	104	Dendropsophus reticulatus	1	web006
Adelphobates galactonotus	105	Adelphobates galactonotus	1	web006
Dendrobates auratus	106	Dendrobates auratus	1	web006
Dendrobates auratus	107	Dendrobates auratus	1	web006
Dendrobates tinctorius	108	Dendrobates tinctorius	1	web006
Phyllomedusa vaillantii	109	Phyllomedusa vaillantii	1	web006
Phyllomedusa hypochondrialis	110	Phyllomedusa hypocondrialis	1	web006
Litoria caerulea	112	Litoria caerulea	1	web006
Neurergus crocatus	114	Neurergus crocatus	1	web006
Agalychnis callidryas	115	Agalychnis callidryas	1	web006
Hyla cinerea	116	Hyla cinerea	1	web006
Dendrobates leucomelas	117	Dendrobates leucomelas	1	web006
Ameerega trivittata	118	Epipedobates trivittatus	1	web006
Ceratophrys cornuta	119	Ceratophrys cornuta	1	web006
Ceratophrys cranwelli	12	Ceratophrys cranwelli	1	web006
Atelopus barbotini	120	Atelopus barbotini	1	web006
Dyscophus guineti	121	Dyscophus guineti	1	web006
Trachycephalus resinifictrix	122	Trachycephalus resinifictrix	1	web006
Ceratophrys cranwelli	123	Ceratophrys cranwelli	1	web006
Ambystoma mexicanum	124	Ambystoma mexicanum	1	web006
Pyxicephalus adspersus	125	Pyxicephalus adspersus	1	web006
Boana boans	126	Boana boans	1	web006
Rhinella margaritifera	127	Rhinella margaritifera	1	web006
Dendropsophus leucophyllatus	128	Hyla leucophyllata	1	web006
Phyllomedusa bicolor	129	Phyllomedusa bicolor	1	web006
Incilius alvarius	13	Incilius alvarius	1	web006
Phyllomedusa tomopterna	130	Phyllomedusa tomopterna	1	web006
Microhyla butleri	131	Microhyla butleri	1	web006
Scaphiophryne marmorata	132	Scaphiophryne marmorata	1	web006
Scaphiophryne obscura	132	Scaphiophryne	1	web006
Scaphiophryne verrucosa	132	Scaphiophryne	1	web006
Hyla arenicolor	133	Hyla arenicolor	1	web006
Ambystoma mavortium	134	Ambystoma mavortium	1	web006
Phlyctimantis maculatus	135	Kassina maculata	1	web006
Trachycephalus coriaceus	137	Trachycephalus coriaceus	1	web006
Gastrophryne carolinensis	138	Gastrophryne carolinensis	1	web006
Hamptophryne boliviana	139	Hamptophryne boliviana	1	web006
Litoria caerulea	14	Litoria caerulea	1	web006
Scaphiopus holbrookii	140	Scaphiopus holbrookii	1	web006
Necturus beyeri	141	Necturus beyeri	1	web006
Mantella betsileo	142	Mantella betsileo	1	web006
Dendrobates leucomelas	143	Dendrobates leucomelas	1	web006
Phyllobates vittatus	143	Phyllobates vittatus	1	web006
Mantella madagascariensis	144	Mantella madagascariensis	1	web006
Mantella nigricans	144	Mantella nigricans	1	web006
Boana calcarata	145	Hypsiboas calcaratus	1	web006
Litoria caerulea	146	Litoria caerulea	1	web006
Smilisca phaeota	147	Smilisca phaeota	1	web006
Plethodon glutinosus	148	Plethodon glutinosus	1	web006
Pleurodeles waltl	149	Pleurodeles waltl	1	web006
Ceratophrys aurita	15	Ceratophrys aurita	1	web006
Eurycea longicauda	151	Eurycea longicauda	1	web006
Incilius valliceps	152	Incilius valliceps	1	web006
Ceratophrys cranwelli	153	Ceratophrys cranwelli	1	web006
Litoria caerulea	154	Litoria caerulea	1	web006
Rana sphenocephala	155	Rana sphenocephala	1	web006
Zhangixalus dennysi	159	Rhacophorus dennysi	1	web006
Ceratophrys cranwelli	16	Ceratophrys cranwelli	1	web006
Mantella madagascariensis	160	Mantella madagascariensis	1	web006
Hyla squirella	161	Hyla squirella	1	web006
Litoria aurea	162	Litoria aurea	1	web006
Anaxyrus woodhousii	164	Anaxyrus woodhousii	1	web006
Ceratophrys cranwelli	165	Ceratophrys cranwelli	1	web006
Strongylopus fasciatus	166	Strongylopus fasciatus	1	web006
Anaxyrus terrestris	168	Anaxyrus terrestris	1	web006
Dendrobates tinctorius	169	Dendrobates tinctorius	1	web006
Litoria caerulea	17	Litoria caerulea	1	web006
Hyla versicolor	170	Hyla versicolor	1	web006
Amphiuma pholeter	171	Amphiuma pholeter	1	web006
Ceratophrys ornata	172	Ceratophrys ornata	1	web006
Siren intermedia	173	Siren intermedia	1	web006
Dendropsophus triangulum	174	Dendropsophus triangulum	1	web006
Agalychnis moreletii	175	Agalychnis moreletii	1	web006
Epipedobates anthonyi	176	Epipedobates anthonyi	1	web006
Ceratophrys ornata	177	Ceratophrys ornata	1	web006
Heterixalus madagascariensis	178	Heterixalus madagascariensis	1	web006
Ambystoma opacum	179	Ambystoma opacum	1	web006
Dendrobates tinctorius	18	Dendrobates tinctorius	1	web006
Mantella aurantiaca	180	Mantella aurantiaca	1	web006
Dendrobates auratus	181	Dendrobates auratus	1	web006
Rana catesbeiana	182	Lithobates catesbeianus	1	web006
Kaloula pulchra	183	Kaloula pulchra	1	web006
Polypedates leucomystax	184	Polypedates leucomystax	1	web006
Polypedates teraiensis	184	Polypedates leucomystax	1	web006
Eurycea lucifuga	185	Eurycea lucifuga	1	web006
Leptopelis vermiculatus	186	Leptopelis vermiculatus	1	web006
Ceratophrys cornuta	187	Ceratophrys cornuta	1	web006
Pipa pipa	188	Pipa pipa	1	web006
Ceratophrys cranwelli	189	Ceratophrys cranwelli	1	web006
Hyalinobatrachium fleischmanni	19	Hyalinobatrachium fleischmanni	1	web006
Boana punctata	19	Hyla punctata	1	web006
Phyllomedusa tomopterna	190	Phyllomedusa tomopterna	1	web006
Pipa pipa	191	Pipa pipa	1	web006
Spea multiplicata	192	Spea multiplicata	1	web006
Anaxyrus cognatus	193	Anaxyrus cognatus	1	web006
Agalychnis callidryas	194	Agalychnis callidryas	1	web006
Salamandra salamandra	195	Salamandra salamandra	1	web006
Ceratophrys cranwelli	196	Ceratophrys cranwelli	1	web006
Eurycea bislineata	198	Eurycea bislineata	1	web006
Boophis albilabris	199	Boophis albilabris	1	web006
Dendrobates auratus	20	Dendrobates auratus	1	web006
Mantella nigricans	200	Mantella nigricans	1	web006
Duttaphrynus melanostictus	202	Duttaphrynus melanostictus	1	web006
Breviceps mossambicus	203	Breviceps mossambicus	1	web006
Ceratophrys cranwelli	204	Ceratophrys cranwelli	1	web006
Pyxicephalus edulis	205	Pyxicephalus edulis	1	web006
Scaphiopus couchii	206	Scaphiopus couchii	1	web006
Mantella pulchra	207	Mantella pulchra	1	web006
Bombina orientalis	208	Bombina orientalis	1	web006
Ceratophrys cranwelli	209	Ceratophrys cranwelli	1	web006
Agalychnis callidryas	210	Agalychnis callidryas	1	web006
Theloderma asperum	211	Theloderma asperum	1	web006
Incilius alvarius	214	Incilius alvarius	1	web006
Ambystoma tigrinum	217	Ambystoma tigrinum	1	web006
Phyllomedusa bicolor	218	Phyllomedusa bicolor	1	web006
Atelopus pulcher	219	Atelopus pulcher	1	web006
Melanophryniscus stelzneri	219	Melanophryniscus stelzneri	1	web006
Oophaga pumilio	220	Dendrobates pumilio	1	web006
Kaloula pulchra	221	Kaloula pulchra	1	web006
Ceratophrys cranwelli	222	Ceratophrys cranwelli	1	web006
Lepidobatrachus llanensis	223	Lepidobatrachus llanensis	1	web006
Ceratophrys cranwelli	224	Ceratophrys cranwelli	1	web006
Ichthyosaura alpestris	225	Ichthyosaura alpestris	1	web006
Pseudacris crucifer	226	Pseudacris crucifer	1	web006
Notophthalmus viridescens	227	Notophthalmus viridescens	1	web006
Ceratophrys cranwelli	228	Ceratophrys cranwelli	1	web006
Notophthalmus viridescens	229	Notophthalmus viridescens	1	web006
Dendrobates auratus	23	Dendrobates auratus	1	web006
Anaxyrus fowleri	230	Anaxyrus fowleri	1	web006
Anaxyrus woodhousii	230	Anaxyrus woodhousii	1	web006
Dendrobates tinctorius	24	Dendrobates tinctorius	1	web006
Dendrobates tinctorius	25	Dendrobates tinctorius	1	web006
Dendrobates tinctorius	26	Dendrobates tinctorius	1	web006
Dendrobates auratus	27	Dendrobates auratus	1	web006
Dendrobates auratus	28	Dendrobates auratus	1	web006
Dendrobates tinctorius	29	Dendrobates tinctorius	1	web006
Dendrobates tinctorius	30	Dendrobates tinctorius	1	web006
Dendrobates tinctorius	31	Dendrobates tinctorius	1	web006
Ambystoma tigrinum	37	Ambystoma tigrinum	1	web006
Ambystoma mexicanum	38	Ambystoma mexicanum	1	web006
Osteopilus septentrionalis	39	Osteopilus septentrionalis	1	web006
Adelphobates galactonotus	40	Adelphobates galactonotus	1	web006
Ceratophrys cranwelli	41	Ceratophrys cranwelli	1	web006
Ceratophrys cranwelli	43	Ceratophrys cranwelli	1	web006
Incilius alvarius	44	Incilius alvarius	1	web006
Litoria caerulea	45	Litoria caerulea	1	web006
Ceratophrys aurita	46	Ceratophrys aurita	1	web006
Ceratophrys cranwelli	47	Ceratophrys cranwelli	1	web006
Litoria caerulea	48	Litoria caerulea	1	web006
Dendrobates tinctorius	49	Dendrobates tinctorius	1	web006
Pipa pipa	5	Pipa pipa	1	web006
Hyalinobatrachium fleischmanni	50	Hyalinobatrachium fleischmanni	1	web006
Boana punctata	50	Hyla punctata	1	web006
Dendrobates auratus	51	Dendrobates auratus	1	web006
Dendrobates auratus	53	Dendrobates auratus	1	web006
Dendrobates tinctorius	54	Dendrobates tinctorius	1	web006
Ambystoma tigrinum	55	Ambystoma tigrinum	1	web006
Ambystoma mexicanum	56	Ambystoma mexicanum	1	web006
Osteopilus septentrionalis	57	Osteopilus septentrionalis	1	web006
Adelphobates galactonotus	58	Adelphobates galactonotus	1	web006
Ceratophrys cranwelli	59	Ceratophrys cranwelli	1	web006
Ceratophrys ornata	62	Ceratophrys ornata	1	web006
Eleutherodactylus planirostris	63	Eleutherodactylus planirostris	1	web006
Rana sphenocephala	64	Rana sphenocephala	1	web006
Dendrobates tinctorius	65	Dendrobates tinctorius	1	web006
Amphiuma means	66	Amphiuma means	1	web006
Siren lacertina	67	Siren lacertina	1	web006
Anaxyrus quercicus	68	Anaxyrus quercicus	1	web006
Dendrobates tinctorius	69	Dendrobates tinctorius	1	web006
Dendrobates tinctorius	70	Dendrobates tinctorius	1	web006
Rhaebo guttatus	71	Bufo guttatus	1	web006
Ameerega trivittata	72	Epipedobates trivittatus	1	web006
Dendrobates tinctorius	73	Dendrobates tinctorius	1	web006
Atelopus barbotini	74	Atelopus barbotini	1	web006
Leptodactylus fallax	75	Leptodactylus fallax	1	web006
Atelopus barbotini	76	Atelopus barbotini	1	web006
Ceratophrys cranwelli	77	Ceratophrys cranwelli	1	web006
Ceratophrys cornuta	78	Ceratophrys cornuta	1	web006
Theloderma corticale	79	Theloderma corticale	1	web006
Dendrobates tinctorius	80	Dendrobates tinctorius	1	web006
Sphaenorhynchus lacteus	81	Sphaenorhynchus lacteus	1	web006
Rhinella marina	82	Bufo marinus	1	web006
Dyscophus guineti	84	Dyscophus guineti	1	web006
Pipa pipa	86	Pipa pipa	1	web006
Dendropsophus marmoratus	87	Hyla marmorata	1	web006
Pleurodeles waltl	88	Pleurodeles waltl	1	web006
Boana crepitans	89	Hypsiboas crepitans	1	web006
Pipa pipa	9	Pipa pipa	1	web006
Allophryne ruthveni	90	Allophryne ruthveni	1	web006
Pipa pipa	91	Pipa pipa	1	web006
Anaxyrus americanus	92	Anaxyrus americanus	1	web006
Dendropsophus ebraccatus	93	Dendropsophus ebraccatus	1	web006
Lepidobatrachus laevis	94	Lepidobatrachus laevis	1	web006
Ambystoma opacum	96	Ambystoma opacum	1	web006
Desmognathus fuscus	97	Desmognathus fuscus	1	web006
Ambystoma maculatum	98	Ambystoma maculatum	1	web006
Plethodon dorsalis	99	Plethodon dorsalis	1	web006
Bombina maxima	1	Bombina maxima	1	web007
Bombina orientalis	1	Bombina orientalis	1	web007
Bombina variegata	1	Bombina variegata	1	web007
Melanophryniscus klappenbachi	1	Melanophryniscus klappenbachi	1	web007
Rhaebo guttatus	1	Rhaebo guttatus	2	web007
Hyalinobatrachium fleischmanni	1	Hyalinobatrachium fleischmanni	1	web007
Ceratophrys aurita	1	Ceratophrys aurita	1	web007
Ceratophrys cornuta	1	Ceratophrys cornuta	1	web007
Ceratophrys cranwelli	1	Ceratophrys cranwelli	1	web007
Ceratophrys ornata	1	Ceratophrys ornata	1	web007
Lepidobatrachus laevis	1	Lepidobatrachus laevis	1	web007
Dendrobates tinctorius	1	Dendrobates tinctorius	1	web007
Phyllobates terribilis	1	Phyllobates terribilis	1	web007
Ranitomeya amazonica	1	Ranitomeya amazonica	1	web007
Ranitomeya sirensis	1	Ranitomeya sirensis	1	web007
Ranitomeya ventrimaculata	1	Ranitomeya ventrimaculata	1	web007
Anotheca spinosa	1	Anotheca spinosa	1	web007
Dendropsophus ebraccatus	1	Dendropsophus ebraccatus	1	web007
Dendropsophus leucophyllatus	1	Dendropsophus leucophyllatus	1	web007
Dendropsophus marmoratus	1	Dendropsophus marmoratus	2	web007
Trachycephalus coriaceus	1	Trachycephalus coriaceus	1	web007
Litoria caerulea	1	Litoria caerulea	1	web007
Litoria chloris	1	Litoria chloris	1	web007
Agalychnis lemur	1	Agalychnis lemur	1	web007
Phyllomedusa hypochondrialis	1	Phyllomedusa hypochondrialis	1	web007
Heterixalus alboguttatus	1	Heterixalus alboguttatus	1	web007
Heterixalus madagascariensis	1	Heterixalus madagascariensis	1	web007
Mantella baroni	1	Mantella baroni	1	web007
Mantella betsileo	1	Mantella betsileo	1	web007
Dyscophus guineti	1	Dyscophus guineti	1	web007
Pyxicephalus adspersus	1	Pyxicephalus adspersus	1	web007
Polypedates leucomystax	1	Polypedates leucomystax	1	web007
Polypedates otilophus	1	Polypedates otilophus	1	web007
Polypedates teraiensis	1	Polypedates leucomystax	1	web007
Theloderma corticale	1	Theloderma corticale	1	web007
Bombina maxima	2	Bombina maxima	1	web007
Bombina orientalis	2	Bombina orientalis	1	web007
Bombina variegata	2	Bombina variegata	1	web007
Melanophryniscus klappenbachi	2	Melanophryniscus klappenbachi	1	web007
Rhaebo guttatus	2	Rhaebo guttatus	2	web007
Hyalinobatrachium fleischmanni	2	Hyalinobatrachium fleischmanni	1	web007
Ceratophrys aurita	2	Ceratophrys aurita	1	web007
Ceratophrys cornuta	2	Ceratophrys cornuta	1	web007
Ceratophrys cranwelli	2	Ceratophrys cranwelli	1	web007
Ceratophrys ornata	2	Ceratophrys ornata	1	web007
Lepidobatrachus laevis	2	Lepidobatrachus laevis	1	web007
Dendrobates tinctorius	2	Dendrobates tinctorius	1	web007
Phyllobates terribilis	2	Phyllobates terribilis	1	web007
Ranitomeya amazonica	2	Ranitomeya amazonica	1	web007
Ranitomeya sirensis	2	Ranitomeya sirensis	1	web007
Ranitomeya ventrimaculata	2	Ranitomeya ventrimaculata	1	web007
Anotheca spinosa	2	Anotheca spinosa	1	web007
Dendropsophus ebraccatus	2	Dendropsophus ebraccatus	1	web007
Dendropsophus leucophyllatus	2	Dendropsophus leucophyllatus	1	web007
Dendropsophus marmoratus	2	Dendropsophus marmoratus	2	web007
Trachycephalus coriaceus	2	Trachycephalus coriaceus	1	web007
Litoria caerulea	2	Litoria caerulea	1	web007
Litoria chloris	2	Litoria chloris	1	web007
Agalychnis lemur	2	Agalychnis lemur	1	web007
Phyllomedusa hypochondrialis	2	Phyllomedusa hypochondrialis	1	web007
Heterixalus alboguttatus	2	Heterixalus alboguttatus	1	web007
Heterixalus madagascariensis	2	Heterixalus madagascariensis	1	web007
Mantella baroni	2	Mantella baroni	1	web007
Mantella betsileo	2	Mantella betsileo	1	web007
Dyscophus guineti	2	Dyscophus guineti	1	web007
Pyxicephalus adspersus	2	Pyxicephalus adspersus	1	web007
Polypedates leucomystax	2	Polypedates leucomystax	1	web007
Polypedates otilophus	2	Polypedates otilophus	1	web007
Polypedates teraiensis	2	Polypedates leucomystax	1	web007
Theloderma corticale	2	Theloderma corticale	1	web007
Rhaebo guttatus	3	Rhaebo guttatus	1	web007
Dendrobates auratus	3	Dendrobates auratus	1	web007
Dendrobates tinctorius	3	Dendrobates tinctorius	1	web007
Phyllobates terribilis	3	Phyllobates terribilis	1	web007
Ranitomeya flavovittata	3	Ranitomeya flavovittata	1	web007
Ranitomeya imitator	3	Ranitomeya imitator	1	web007
Ranitomeya variabilis	3	Ranitomeya variabilis	1	web007
Litoria caerulea	3	Litoria caerulea	1	web007
Agalychnis moreletii	3	Agalychnis moreletii	1	web007
Bombina variegata	4	Bombina variegata	1	web007
Melanophryniscus klappenbachi	4	Melanophryniscus klappenbachi	1	web007
Rentapia hosii	4	Pedostibes hosii	1	web007
Ceratophrys cranwelli	4	Ceratophrys cranwelli	1	web007
Ameerega trivittata	4	Epipedobates trivittatus	1	web007
Epipedobates anthonyi	4	Epipedobates anthonyi	1	web007
Adelphobates galactonotus	4	Adelphobates galactonotus	2	web007
Dendrobates auratus	4	Dendrobates auratus	1	web007
Dendrobates leucomelas	4	Dendrobates leucomelas	1	web007
Dendrobates tinctorius	4	Dendrobates tinctorius	1	web007
Dendrobates truncatus	4	Dendrobates truncatus	1	web007
Oophaga pumilio	4	Dendrobates pumilio	1	web007
Phyllobates bicolor	4	Phyllobates bicolor	1	web007
Phyllobates terribilis	4	Phyllobates terribilis	1	web007
Phyllobates vittatus	4	Phyllobates vittatus	1	web007
Ranitomeya amazonica	4	Dendrobates amazonicus	1	web007
Ranitomeya benedicta	4	Ranitomeya benedicta	1	web007
Ranitomeya fantastica	4	Ranitomeya fantastica	1	web007
Ranitomeya imitator	4	Ranitomeya imitator	2	web007
Ranitomeya vanzolinii	4	Ranitomeya vanzolinii	2	web007
Ranitomeya variabilis	4	Ranitomeya variabilis	1	web007
Ranitomeya ventrimaculata	4	Ranitomeya ventrimaculata	2	web007
Hyla arborea	4	Hyla arborea	1	web007
Trachycephalus resinifictrix	4	Trachycephalus resinifictrix	1	web007
Litoria caerulea	4	Litoria caerulea	1	web007
Agalychnis callidryas	4	Agalychnis callidryas	1	web007
Phyllomedusa tomopterna	4	Phyllomedusa tomopterna	1	web007
Heterixalus alboguttatus	4	Heterixalus alboguttatus	1	web007
Heterixalus madagascariensis	4	Heterixalus madagascariensis	1	web007
Mantella aurantiaca	4	Mantella aurantiaca	1	web007
Mantella pulchra	4	Mantella pulchra	1	web007
Mantella viridis	4	Mantella viridis	1	web007
Pelobatrachus nasuta	4	Megophrys nasuta	1	web007
Pipa parva	4	Pipa parva	1	web007
Polypedates otilophus	4	Polypedates otilophus	1	web007
Theloderma asperum	4	Theloderma asperum	1	web007
Theloderma bicolor	4	Theloderma bicolor	1	web007
Theloderma corticale	4	Theloderma corticale	1	web007
Theloderma stellatum	4	Theloderma stellatum	1	web007
Bombina variegata	5	Bombina variegata	1	web007
Melanophryniscus klappenbachi	5	Melanophryniscus klappenbachi	1	web007
Rentapia hosii	5	Pedostibes hosii	1	web007
Ceratophrys cranwelli	5	Ceratophrys cranwelli	1	web007
Ameerega trivittata	5	Epipedobates trivittatus	1	web007
Epipedobates anthonyi	5	Epipedobates anthonyi	1	web007
Adelphobates galactonotus	5	Adelphobates galactonotus	2	web007
Dendrobates auratus	5	Dendrobates auratus	1	web007
Dendrobates leucomelas	5	Dendrobates leucomelas	1	web007
Dendrobates tinctorius	5	Dendrobates tinctorius	1	web007
Dendrobates truncatus	5	Dendrobates truncatus	1	web007
Oophaga pumilio	5	Dendrobates pumilio	1	web007
Phyllobates bicolor	5	Phyllobates bicolor	1	web007
Phyllobates terribilis	5	Phyllobates terribilis	1	web007
Phyllobates vittatus	5	Phyllobates vittatus	1	web007
Ranitomeya amazonica	5	Dendrobates amazonicus	1	web007
Ranitomeya benedicta	5	Ranitomeya benedicta	1	web007
Ranitomeya fantastica	5	Ranitomeya fantastica	1	web007
Ranitomeya imitator	5	Ranitomeya imitator	2	web007
Ranitomeya vanzolinii	5	Ranitomeya vanzolinii	2	web007
Ranitomeya variabilis	5	Ranitomeya variabilis	1	web007
Ranitomeya ventrimaculata	5	Ranitomeya ventrimaculata	2	web007
Hyla arborea	5	Hyla arborea	1	web007
Trachycephalus resinifictrix	5	Trachycephalus resinifictrix	1	web007
Litoria caerulea	5	Litoria caerulea	1	web007
Agalychnis callidryas	5	Agalychnis callidryas	1	web007
Phyllomedusa tomopterna	5	Phyllomedusa tomopterna	1	web007
Heterixalus alboguttatus	5	Heterixalus alboguttatus	1	web007
Heterixalus madagascariensis	5	Heterixalus madagascariensis	1	web007
Mantella aurantiaca	5	Mantella aurantiaca	1	web007
Mantella pulchra	5	Mantella pulchra	1	web007
Mantella viridis	5	Mantella viridis	1	web007
Pelobatrachus nasuta	5	Megophrys nasuta	1	web007
Pipa parva	5	Pipa parva	1	web007
Polypedates otilophus	5	Polypedates otilophus	1	web007
Theloderma asperum	5	Theloderma asperum	1	web007
Theloderma bicolor	5	Theloderma bicolor	1	web007
Theloderma corticale	5	Theloderma corticale	1	web007
Theloderma stellatum	5	Theloderma stellatum	1	web007
Leptopelis uluguruensis	1	Leptopelis uluguruensis	1	web008
Leptopelis vermiculatus	1	Leptopelis vermiculatus	1	web008
Bombina orientalis	1	Bombina orientalis	1	web008
Bombina variegata	1	Bombina variegata	1	web008
Breviceps mossambicus	1	Breviceps mossambicus	1	web008
Anaxyrus cognatus	1	Bufo cognatus	1	web008
Anaxyrus debilis	1	Anaxyrus debilis	1	web008
Anaxyrus speciosus	1	Bufo speciosus	1	web008
Anaxyrus terrestris	1	Bufo terrestris	1	web008
Atelopus spumarius	1	Atelopus spumarius	1	web008
Barbarophryne brongersmai	1	Barbarophryne brongersmai	1	web008
Bufo gargarizans	1	Bufo gargarizans	1	web008
Bufotes pewzowi	1	Bufo pewzowi	1	web008
Bufotes viridis	1	Bufo viridis	1	web008
Duttaphrynus melanostictus	1	Duttaphrynus melanostictus	1	web008
Incilius alvarius	1	Bufo alvarius	1	web008
Melanophryniscus stelzneri	1	Melanophryniscus stelzneri	1	web008
Phrynoidis aspera	1	Phrynoidis aspera	2	web008
Rentapia hosii	1	Pedostibes hosii	1	web008
Rhinella marina	1	Rhinella marina	1	web008
Rhinella martyi	1	Rhinella martyi	1	web008
Sclerophrys regularis	1	Bufo regularis	1	web008
Hyalinobatrachium fleischmanni	1	Hyalinobatrachium fleischmanni	1	web008
Ceratophrys cranwelli	1	Ceratophrys cranwelli	1	web008
Ceratophrys ornata	1	Ceratophrys ornata	1	web008
Lepidobatrachus laevis	1	Lepidobatrachus laevis	1	web008
Epipedobates tricolor	1	Epipedobates tricolor	1	web008
Dendrobates auratus	1	Dendrobates auratus	1	web008
Dendrobates leucomelas	1	Dendrobates leucomelas	1	web008
Dendrobates tinctorius	1	Dendrobates tinctorius	1	web008
Dendrobates truncatus	1	Dendrobates truncatus	1	web008
Phyllobates vittatus	1	Phyllobates vittatus	1	web008
Limnonectes malesianus	1	Limnonectes malesianus	1	web008
Occidozyga lima	1	Occidozyga lima	1	web008
Hemisus marmoratus	1	Hemisus marmoratus	1	web008
Dendropsophus ebraccatus	1	Dendropsophus ebraccatus	1	web008
Hyla arborea	1	Hyla arborea	1	web008
Hyla chinensis	1	Hyla chinensis	1	web008
Hyla cinerea	1	Hyla cinerea	1	web008
Hyla gratiosa	1	Hyla gratiosa	1	web008
Hyla savignyi	1	Hyla savignyi	1	web008
Hyla versicolor	1	Hyla versicolor	1	web008
Osteopilus septentrionalis	1	Osteopilus septentrionalis	1	web008
Trachycephalus resinifictrix	1	Phrynohyas resinifictrix	1	web008
Litoria aurea	1	Litoria aurea	1	web008
Litoria caerulea	1	Litoria caerulea	1	web008
Litoria infrafrenata	1	Litoria infrafrenata	1	web008
Litoria rubella	1	Litoria rubella	1	web008
Agalychnis callidryas	1	Agalychnis callidryas	1	web008
Agalychnis moreletii	1	Agalychnis moreletii	1	web008
Agalychnis spurrelli	1	Agalychnis spurrelli	1	web008
Phyllomedusa sauvagii	1	Phyllomedusa sauvagii	1	web008
Phyllomedusa tomopterna	1	Phyllomedusa tomopterna	1	web008
Afrixalus dorsalis	1	Afrixalus dorsalis	1	web008
Afrixalus fulvovittatus	1	Afrixalus fulvovittatus	1	web008
Hyperolius argus	1	Hyperolius argus	1	web008
Hyperolius fusciventris	1	Hyperolius fusciventris	1	web008
Hyperolius guttulatus	1	Hyperolius guttulatus	1	web008
Hyperolius marmoratus	1	Hyperolius marmoratus	1	web008
Hyperolius puncticulatus	1	Hyperolius puncticulatus	1	web008
Hyperolius riggenbachi	1	Hyperolius riggenbachi	1	web008
Hyperolius viridiflavus	1	Hyperolius viridiflavus	1	web008
Kassina senegalensis	1	Kassina senegalensis	1	web008
Phlyctimantis maculatus	1	Kassina maculata	1	web008
Boophis luteus	1	Boophis luteus	1	web008
Mantella aurantiaca	1	Mantella aurantiaca	1	web008
Mantella betsileo	1	Mantella betsileo	1	web008
Mantella ebenaui	1	Mantella ebenaui	1	web008
Mantella expectata	1	Mantella expectata	1	web008
Mantella madagascariensis	1	Mantella madagascariensis	1	web008
Mantella viridis	1	Mantella viridis	1	web008
Megophrys montana	1	Megophrys montana	1	web008
Pelobatrachus nasuta	1	Megophrys nasuta	1	web008
Dyscophus antongilii	1	Dyscophus antongilii	1	web008
Dyscophus guineti	1	Dyscophus guineti	1	web008
Kaloula baleata	1	Kaloula baleata	1	web008
Kaloula pulchra	1	Kaloula pulchra	1	web008
Microhyla fissipes	1	Microhyla fissipes	1	web008
Phrynomantis bifasciatus	1	Phrynomantis bifasciatus	1	web008
Phrynomantis microps	1	Phrynomantis microps	1	web008
Scaphiophryne madagascariensis	1	Scaphiophryne madagascariensis	1	web008
Scaphiophryne obscura	1	Scaphiophryne	1	web008
Scaphiophryne spinosa	1	Scaphiophryne spinosa	1	web008
Scaphiophryne verrucosa	1	Scaphiophryne	1	web008
Pelobates fuscus	1	Pelobates fuscus	1	web008
Hymenochirus boettgeri	1	Hymenochirus boettgeri	1	web008
Pipa pipa	1	Pipa pipa	1	web008
Xenopus laevis	1	Xenopus laevis	1	web008
Pyxicephalus adspersus	1	Pyxicephalus adspersus	1	web008
Pyxicephalus edulis	1	Pyxicephalus edulis	1	web008
Hylarana erythraea	1	Hylarana erythraea	2	web008
Odorrana livida	1	Rana livida	1	web008
Pelophylax esculentus	1	Pelophylax lessonae	1	web008
Pelophylax lessonae	1	Pelophylax lessonae	1	web008
Chiromantis xerampelina	1	Chiromantis xerampelina	1	web008
Polypedates leucomystax	1	Polypedates leucomystax	1	web008
Polypedates otilophus	1	Polypedates otilophus	1	web008
Polypedates teraiensis	1	Polypedates leucomystax	1	web008
Rhacophorus reinwardtii	1	Rhacophorus reinwardtii	1	web008
Theloderma corticale	1	Theloderma corticale	1	web008
Zhangixalus dennysi	1	Rhacophorus dennysi	1	web008
Zhangixalus feae	1	Rhacophorus feae	1	web008
Scaphiopus holbrookii	1	Scaphiopus holbrookii	1	web008
Ambystoma maculatum	1	Ambystoma maculatum	1	web008
Ambystoma mexicanum	1	Ambystoma mexicanum	1	web008
Ambystoma opacum	1	Ambystoma opacum	1	web008
Ambystoma texanum	1	Ambystoma texanum	1	web008
Ambystoma tigrinum	1	Ambystoma tigrinum	1	web008
Eurycea cirrigera	1	Eurycea cirrigera	1	web008
Plethodon cinereus	1	Plethodon cinereus	1	web008
Plethodon glutinosus	1	Plethodon glutinosus	1	web008
Necturus maculosus	1	Necturus maculosus	1	web008
Cynops orientalis	1	Cynops orientalis	1	web008
Cynops pyrrhogaster	1	Cynops pyrrhogaster	1	web008
Ichthyosaura alpestris	1	Ichthyosaura alpestris	2	web008
Neurergus crocatus	1	Neurergus crocatus	1	web008
Notophthalmus viridescens	1	Notophthalmus viridescens	1	web008
Ommatotriton nesterovi	1	Ommatotriton nesterovi	1	web008
Ommatotriton ophryticus	1	Ommatotriton ophryticus	1	web008
Paramesotriton labiatus	1	Pachytriton labiatus	1	web008
Pleurodeles waltl	1	Pleurodeles waltl	1	web008
Triturus carnifex	1	Triturus carnifex	1	web008
Triturus marmoratus	1	Triturus marmoratus	1	web008
Triturus pygmaeus	1	Triturus pygmaeus	1	web008
Tylototriton verrucosus	1	Tylototriton verrucosus	1	web008
Salamandra salamandra	1	Salamandra salamandra	1	web008
Pseudobranchus striatus	1	Pseudobranchus striatus	1	web008
Siren lacertina	1	Siren lacertina	1	web008
Geotrypetes seraphini	1	Geotrypetes seraphini	1	web008
Paramesotriton labiatus	1	Pachytriton labiatus	1	web009
Pleurodeles waltl	1	Pleurodeles waltl	1	web009
Ceratophrys cranwelli	2	Ceratophrys cranwelli	1	web010
Hyla cinerea	3	Hyla cinerea	1	web010
Pipa pipa	1	Pipa pipa	1	web011
Litoria caerulea	2	Litoria caerulea	1	web012
Litoria fallax	3	Litoria fallax	1	web012
Ambystoma mexicanum	5	Ambystoma mexicanum	1	web012
Litoria caerulea	6	Litoria caerulea	1	web012
Litoria infrafrenata	7	Litoria infrafrenata	1	web012
Limnodynastes tasmaniensis	9	Limnodynastes tasmaniensis	1	web012
Bombina bombina	1	Bombina bombina	1	web014
Bombina orientalis	1	Bombina orientalis	1	web014
Bombina pachypus	1	Bombina pachypus	1	web014
Bombina variegata	1	Bombina variegata	1	web014
Anaxyrus quercicus	1	Anaxyrus quercicus	1	web014
Anaxyrus terrestris	1	Anaxyrus terrestris	1	web014
Bufotes viridis	1	Bufotes viridis	2	web014
Hyalinobatrachium valerioi	1	Hyalinobatrachium valerioi	1	web014
Ameerega bassleri	1	Ameerega bassleri	1	web014
Epipedobates anthonyi	1	Epipedobates anthonyi	1	web014
Dendrobates leucomelas	1	Dendrobates leucomelas	1	web014
Dendrobates tinctorius	1	Dendrobates tinctorius	1	web014
Oophaga pumilio	1	Oophaga pumilio	1	web014
Phyllobates vittatus	1	Phyllobates vittatus	1	web014
Hyla cinerea	1	Hyla cinerea	1	web014
Osteopilus septentrionalis	1	Osteopilus septentrionalis	1	web014
Litoria caerulea	1	Litoria caerulea	1	web014
Mantella aurantiaca	1	Mantella aurantiaca	1	web014
Dyscophus insularis	1	Dyscophus insularis	1	web014
Pipa parva	1	Pipa parva	1	web014
Pipa pipa	1	Pipa pipa	1	web014
Ambystoma maculatum	1	Ambystoma maculatum	1	web014
Aneides lugubris	1	Aneides lugubris	1	web014
Cynops orientalis	1	Cynops orientalis	1	web014
Pleurodeles waltl	1	Pleurodeles waltl	1	web014
Taricha granulosa	1	Taricha granulosa	1	web014
Triturus dobrogicus	1	Triturus dobrogicus	1	web014
Triturus pygmaeus	1	Triturus pygmaeus	1	web014
Salamandra atra	1	Salamandra atra	1	web014
Salamandra infraimmaculata	1	Salamandra infraimmaculata	1	web014
Salamandra salamandra	1	Salamandra salamandra	1	web014
Bombina orientalis	10	Bombina orientalis	1	web015
Conraua goliath	11	Conraua goliath	1	web015
Pyxicephalus adspersus	11	Pyxicephalus adspersus	1	web015
Pelobatrachus nasuta	12	Megophrys nasuta	1	web015
Agalychnis callidryas	13	Agalychnis callidryas	1	web015
Phyllomedusa sauvagii	14	Phyllomedusa sauvagii	1	web015
Litoria caerulea	15	Litoria caerulea	1	web015
Cynops orientalis	16	Cynops orientalis	1	web015
Bombina orientalis	17	Bombina orientalis	1	web015
Cynops orientalis	17	Cynops orientalis	1	web015
Cynops pyrrhogaster	17	Cynops pyrrhogaster	1	web015
Bombina orientalis	2	Bombina orientalis	1	web015
Melanophryniscus stelzneri	2	Melanophryniscus stelzneri	1	web015
Lepidobatrachus laevis	2	Lepidobatrachus laevis	1	web015
Dendrobates leucomelas	2	Dendrobates leucomelas	1	web015
Dendrobates tinctorius	2	Dendrobates azureus	1	web015
Trachycephalus resinifictrix	2	Trachycephalus resinifictrix	1	web015
Litoria caerulea	2	Litoria caerulea	1	web015
Agalychnis callidryas	2	Agalychnis callidryas	1	web015
Phyllomedusa sauvagii	2	Phyllomedusa sauvagii	1	web015
Pelobatrachus nasuta	2	Megophrys nasuta	1	web015
Pyxicephalus adspersus	2	Pyxicephalus adspersus	1	web015
Cynops orientalis	3	Cynops orientalis	1	web015
Bombina orientalis	4	Bombina orientalis	1	web015
Melanophryniscus stelzneri	4	Melanophryniscus stelzneri	1	web015
Lepidobatrachus laevis	4	Lepidobatrachus laevis	1	web015
Dendrobates leucomelas	4	Dendrobates leucomelas	1	web015
Dendrobates tinctorius	4	Dendrobates azureus	1	web015
Trachycephalus resinifictrix	4	Trachycephalus resinifictrix	1	web015
Litoria caerulea	4	Litoria caerulea	1	web015
Agalychnis callidryas	4	Agalychnis callidryas	1	web015
Phyllomedusa sauvagii	4	Phyllomedusa sauvagii	1	web015
Pelobatrachus nasuta	4	Megophrys nasuta	1	web015
Pyxicephalus adspersus	4	Pyxicephalus adspersus	1	web015
Trachycephalus resinifictrix	5	Trachycephalus resinifictrix	1	web015
Dendrobates tinctorius	6	Dendrobates azureus	1	web015
Lepidobatrachus laevis	7	Lepidobatrachus laevis	1	web015
Melanophryniscus stelzneri	8	Melanophryniscus stelzneri	1	web015
Dendrobates leucomelas	9	Dendrobates leucomelas	1	web015
Phyllobates terribilis	9	Phyllobates terribilis	1	web015
Rhinella marina	1	Bufo marinus	1	web017
Ceratophrys aurita	1	Ceratophrys aurita	1	web017
Ceratophrys cranwelli	1	Ceratophrys cranwelli	1	web017
Ceratophrys ornata	1	Ceratophrys ornata	1	web017
Dendrobates tinctorius	1	Dendrobates tinctorius	1	web017
Hyla gratiosa	1	Hyla gratiosa	1	web017
Trachycephalus resinifictrix	1	Trachycephalus resinifictrix	1	web017
Agalychnis callidryas	1	Agalychnis callidryas	1	web017
Mantella expectata	1	Mantella expectata	1	web017
Pyxicephalus adspersus	1	Pyxicephalus adspersus	1	web017
Rhacophorus exechopygus	1	Rhacophorus exechopygus	1	web017
Theloderma corticale	1	Theloderma corticale	1	web017
Taricha granulosa	1	Taricha granulosa	1	web017
Salamandra salamandra	1	Salamandra salamandra	1	web017
Dendrobates auratus	1	Dendrobates auratus	1	web018
Xenopus laevis	1	Xenopus laevis	1	web019
Ambystoma mavortium	1	Ambystoma mavortium	1	web019
Cynops cyanurus	1	Cynops cyanurus	1	web019
Notophthalmus viridescens	1	Notophthalmus viridescens	1	web019
Laotriton laoensis	10	Laotriton laoensis	1	web019
Notophthalmus viridescens	10	Notophthalmus viridescens	1	web019
Notophthalmus viridescens	100	Notophthalmus viridescens	1	web019
Taricha granulosa	100	Taricha granulosa	1	web019
Notophthalmus viridescens	101	Notophthalmus viridescens	1	web019
Taricha granulosa	101	Taricha granulosa	1	web019
Taricha rivularis	101	Taricha rivularis	1	web019
Neurergus crocatus	102	Neurergus crocatus	1	web019
Neurergus kaiseri	102	Neurergus kaiseri	1	web019
Notophthalmus viridescens	102	Notophthalmus viridescens	1	web019
Triturus pygmaeus	102	Triturus pygmaeus	1	web019
Lissotriton italicus	103	Lissotriton italicus	2	web019
Lissotriton vulgaris	103	Lissotriton vulgaris	1	web019
Notophthalmus viridescens	103	Notophthalmus viridescens	1	web019
Triturus marmoratus	103	Triturus marmoratus	1	web019
Notophthalmus viridescens	104	Notophthalmus viridescens	1	web019
Triturus marmoratus	104	Triturus marmoratus	1	web019
Cynops orientalis	105	Cynops orientalis	1	web019
Notophthalmus viridescens	105	Notophthalmus viridescens	1	web019
Paramesotriton chinensis	105	Paramesotriton chinensis	1	web019
Neurergus crocatus	106	Neurergus crocatus	1	web019
Notophthalmus viridescens	106	Notophthalmus viridescens	1	web019
Notophthalmus viridescens	107	Notophthalmus viridescens	1	web019
Cynops orientalis	108	Hypselotriton orientalis	1	web019
Notophthalmus viridescens	108	Notophthalmus viridescens	1	web019
Ichthyosaura alpestris	109	Ichthyosaura alpestris	1	web019
Notophthalmus viridescens	109	Notophthalmus viridescens	1	web019
Triturus dobrogicus	109	Triturus dobrogicus	1	web019
Notophthalmus viridescens	11	Notophthalmus viridescens	1	web019
Triturus cristatus	11	Triturus cristatus	1	web019
Triturus dobrogicus	11	Triturus dobrogicus	1	web019
Triturus macedonicus	11	Triturus macedonicus	1	web019
Tylototriton yangi	11	Tylototriton yangi	1	web019
Epipedobates anthonyi	110	Epipedobates anthonyi	1	web019
Notophthalmus viridescens	110	Notophthalmus viridescens	1	web019
Taricha granulosa	110	Taricha granulosa	1	web019
Triturus marmoratus	110	Triturus marmoratus	1	web019
Notophthalmus viridescens	111	Notophthalmus viridescens	1	web019
Triturus marmoratus	111	Triturus marmoratus	1	web019
Notophthalmus viridescens	112	Notophthalmus viridescens	1	web019
Eurycea cirrigera	113	Eurycea cirrigera	1	web019
Cynops orientalis	113	Cynops orientalis	1	web019
Notophthalmus viridescens	113	Notophthalmus viridescens	1	web019
Paramesotriton chinensis	113	Paramesotriton chinensis	1	web019
Triturus dobrogicus	113	Triturus dobrogicus	1	web019
Ichthyosaura alpestris	114	Ichthyosaura alpestris	1	web019
Notophthalmus viridescens	114	Notophthalmus viridescens	1	web019
Triturus dobrogicus	114	Triturus dobrogicus	1	web019
Notophthalmus viridescens	115	Notophthalmus viridescens	1	web019
Neurergus crocatus	116	Neurergus crocatus	1	web019
Neurergus kaiseri	116	Neurergus kaiseri	1	web019
Notophthalmus viridescens	116	Notophthalmus viridescens	1	web019
Triturus dobrogicus	116	Triturus dobrogicus	1	web019
Triturus karelinii	116	Triturus karelinii	1	web019
Salamandra salamandra	116	Salamandra salamandra	1	web019
Notophthalmus viridescens	117	Notophthalmus viridescens	1	web019
Neurergus strauchii	118	Neurergus strauchii	1	web019
Notophthalmus viridescens	118	Notophthalmus viridescens	1	web019
Notophthalmus viridescens	119	Notophthalmus viridescens	1	web019
Dendrobates leucomelas	12	Dendrobates leucomelas	1	web019
Dendrobates tinctorius	12	Dendrobates tinctorius	1	web019
Agalychnis callidryas	12	Agalychnis callidryas	1	web019
Notophthalmus viridescens	12	Notophthalmus viridescens	1	web019
Eurycea lucifuga	120	Eurycea lucifuga	1	web019
Notophthalmus viridescens	120	Notophthalmus viridescens	1	web019
Cynops cyanurus	121	Cynops cyanurus	1	web019
Notophthalmus viridescens	121	Notophthalmus viridescens	1	web019
Notophthalmus viridescens	122	Notophthalmus viridescens	1	web019
Notophthalmus viridescens	123	Notophthalmus viridescens	1	web019
Notophthalmus viridescens	124	Notophthalmus viridescens	1	web019
Notophthalmus viridescens	125	Notophthalmus viridescens	1	web019
Neurergus kaiseri	126	Neurergus kaiseri	1	web019
Notophthalmus viridescens	126	Notophthalmus viridescens	1	web019
Neurergus kaiseri	127	Neurergus kaiseri	1	web019
Notophthalmus viridescens	127	Notophthalmus viridescens	1	web019
Triturus karelinii	127	Triturus karelinii	1	web019
Neurergus kaiseri	128	Neurergus kaiseri	1	web019
Notophthalmus viridescens	128	Notophthalmus viridescens	1	web019
Aneides lugubris	129	Aneides lugubris	1	web019
Neurergus kaiseri	129	Neurergus kaiseri	1	web019
Notophthalmus viridescens	129	Notophthalmus viridescens	1	web019
Triturus dobrogicus	129	Triturus dobrogicus	1	web019
Polypedates otilophus	13	Polypedates otilophus	1	web019
Cynops pyrrhogaster	13	Cynops pyrrhogaster	1	web019
Notophthalmus viridescens	13	Notophthalmus viridescens	1	web019
Neurergus kaiseri	130	Neurergus kaiseri	1	web019
Notophthalmus viridescens	130	Notophthalmus viridescens	1	web019
Neurergus kaiseri	131	Neurergus kaiseri	1	web019
Notophthalmus viridescens	131	Notophthalmus viridescens	1	web019
Neurergus kaiseri	132	Neurergus kaiseri	1	web019
Notophthalmus viridescens	132	Notophthalmus viridescens	1	web019
Triturus dobrogicus	132	Triturus dobrogicus	1	web019
Triturus karelinii	132	Triturus karelinii	1	web019
Notophthalmus viridescens	133	Notophthalmus viridescens	1	web019
Triturus dobrogicus	133	Triturus dobrogicus	1	web019
Notophthalmus viridescens	134	Notophthalmus viridescens	1	web019
Notophthalmus viridescens	135	Notophthalmus viridescens	1	web019
Pleurodeles waltl	135	Pleurodeles waltl	1	web019
Notophthalmus viridescens	136	Notophthalmus viridescens	1	web019
Notophthalmus viridescens	137	Notophthalmus viridescens	1	web019
Notophthalmus viridescens	138	Notophthalmus viridescens	1	web019
Notophthalmus viridescens	139	Notophthalmus viridescens	1	web019
Notophthalmus viridescens	14	Notophthalmus viridescens	1	web019
Pleurodeles waltl	14	Pleurodeles waltl	1	web019
Notophthalmus viridescens	140	Notophthalmus viridescens	1	web019
Tylototriton verrucosus	140	Tylototriton verrucosus	1	web019
Cynops pyrrhogaster	141	Cynops pyrrhogaster	1	web019
Notophthalmus viridescens	141	Notophthalmus viridescens	1	web019
Notophthalmus viridescens	142	Notophthalmus viridescens	1	web019
Triturus karelinii	142	Triturus karelinii	1	web019
Neurergus strauchii	143	Neurergus strauchii	1	web019
Notophthalmus viridescens	143	Notophthalmus viridescens	1	web019
Triturus dobrogicus	143	Triturus dobrogicus	1	web019
Notophthalmus viridescens	144	Notophthalmus viridescens	1	web019
Cynops cyanurus	145	Cynops cyanurus	1	web019
Notophthalmus viridescens	145	Notophthalmus viridescens	1	web019
Notophthalmus viridescens	146	Notophthalmus viridescens	1	web019
Notophthalmus viridescens	147	Notophthalmus viridescens	1	web019
Ambystoma mexicanum	148	Ambystoma mexicanum	1	web019
Eurycea guttolineata	148	Eurycea guttolineata	1	web019
Notophthalmus viridescens	148	Notophthalmus viridescens	1	web019
Triturus dobrogicus	148	Triturus dobrogicus	1	web019
Tylototriton verrucosus	148	Tylototriton verrucosus	1	web019
Laotriton laoensis	149	Laotriton laoensis	1	web019
Notophthalmus viridescens	149	Notophthalmus viridescens	1	web019
Neurergus kaiseri	15	Neurergus kaiseri	1	web019
Notophthalmus viridescens	15	Notophthalmus viridescens	1	web019
Notophthalmus viridescens	150	Notophthalmus viridescens	1	web019
Laotriton laoensis	151	Laotriton laoensis	1	web019
Notophthalmus viridescens	151	Notophthalmus viridescens	1	web019
Laotriton laoensis	152	Laotriton laoensis	1	web019
Neurergus strauchii	152	Neurergus strauchii	1	web019
Notophthalmus viridescens	152	Notophthalmus viridescens	1	web019
Neurergus kaiseri	153	Neurergus kaiseri	1	web019
Notophthalmus viridescens	153	Notophthalmus viridescens	1	web019
Tylototriton verrucosus	153	Tylototriton verrucosus	1	web019
Notophthalmus viridescens	154	Notophthalmus viridescens	1	web019
Ambystoma andersoni	155	Ambystoma andersoni	1	web019
Notophthalmus viridescens	155	Notophthalmus viridescens	1	web019
Triturus dobrogicus	155	Triturus dobrogicus	1	web019
Triturus karelinii	155	Triturus karelinii	1	web019
Laotriton laoensis	156	Laotriton laoensis	1	web019
Notophthalmus viridescens	156	Notophthalmus viridescens	1	web019
Ambystoma tigrinum	157	Ambystoma tigrinum	1	web019
Ichthyosaura alpestris	157	Ichthyosaura alpestris	1	web019
Notophthalmus viridescens	157	Notophthalmus viridescens	1	web019
Taricha torosa	157	Taricha torosa	1	web019
Triturus dobrogicus	157	Triturus dobrogicus	1	web019
Triturus marmoratus	157	Triturus marmoratus	1	web019
Tylototriton verrucosus	157	Tylototriton verrucosus	1	web019
Ambystoma mexicanum	158	Ambystoma mexicanum	1	web019
Cynops orientalis	158	Cynops orientalis	1	web019
Notophthalmus viridescens	158	Notophthalmus viridescens	1	web019
Taricha torosa	158	Taricha torosa	1	web019
Ambystoma mavortium	159	Ambystoma mavortium	1	web019
Cynops ensicauda	159	Cynops ensicauda	1	web019
Notophthalmus viridescens	159	Notophthalmus viridescens	1	web019
Cynops ensicauda	16	Cynops ensicauda	1	web019
Ichthyosaura alpestris	16	Ichthyosaura alpestris	1	web019
Notophthalmus viridescens	16	Notophthalmus viridescens	1	web019
Rhinella marina	160	Bufo marinus	1	web019
Cynops ensicauda	160	Cynops ensicauda	1	web019
Cynops orientalis	160	Hypselotriton orientalis	1	web019
Notophthalmus viridescens	160	Notophthalmus viridescens	1	web019
Triturus dobrogicus	160	Triturus dobrogicus	1	web019
Ambystoma talpoideum	161	Ambystoma talpoideum	1	web019
Eurycea wilderae	161	Eurycea wilderae	1	web019
Desmognathus aeneus	161	Desmognathus aeneus	1	web019
Neurergus strauchii	161	Neurergus strauchii	1	web019
Notophthalmus viridescens	161	Notophthalmus viridescens	1	web019
Pleurodeles waltl	161	Pleurodeles waltl	1	web019
Triturus dobrogicus	161	Triturus dobrogicus	1	web019
Notophthalmus viridescens	162	Notophthalmus viridescens	1	web019
Cynops orientalis	163	Cynops orientalis	1	web019
Notophthalmus viridescens	163	Notophthalmus viridescens	1	web019
Taricha granulosa	163	Taricha granulosa	1	web019
Xenopus laevis	164	Xenopus laevis	1	web019
Lissotriton vulgaris	164	Lissotriton vulgaris	1	web019
Neurergus strauchii	164	Neurergus strauchii	1	web019
Notophthalmus viridescens	164	Notophthalmus viridescens	1	web019
Cynops ensicauda	165	Cynops ensicauda	1	web019
Neurergus kaiseri	165	Neurergus kaiseri	1	web019
Notophthalmus viridescens	165	Notophthalmus viridescens	1	web019
Pleurodeles waltl	165	Pleurodeles waltl	1	web019
Triturus dobrogicus	165	Triturus dobrogicus	1	web019
Triturus marmoratus	165	Triturus marmoratus	1	web019
Cynops orientalis	166	Cynops orientalis	1	web019
Notophthalmus viridescens	166	Notophthalmus viridescens	1	web019
Tylototriton shanjing	166	Tylototriton shanjing	1	web019
Ambystoma andersoni	167	Ambystoma andersoni	1	web019
Notophthalmus viridescens	167	Notophthalmus viridescens	1	web019
Triturus dobrogicus	167	Triturus dobrogicus	1	web019
Aneides flavipunctatus	168	Aneides flavipunctatus	1	web019
Cynops chenggongensis	168	Cynops chenggongensis	1	web019
Cynops orientalis	168	Cynops orientalis	1	web019
Notophthalmus viridescens	168	Notophthalmus viridescens	1	web019
Pleurodeles waltl	168	Pleurodeles waltl	1	web019
Tylototriton verrucosus	168	Tylototriton verrucosus	1	web019
Cynops cyanurus	169	Cynops cyanurus	1	web019
Notophthalmus viridescens	169	Notophthalmus viridescens	1	web019
Triturus dobrogicus	169	Triturus dobrogicus	1	web019
Tylototriton shanjing	169	Tylototriton shanjing	1	web019
Cynops ensicauda	17	Cynops ensicauda	1	web019
Cynops orientalis	17	Cynops orientalis	1	web019
Lissotriton boscai	17	Lissotriton boscai	1	web019
Notophthalmus viridescens	17	Notophthalmus viridescens	1	web019
Ambystoma andersoni	170	Ambystoma andersoni	1	web019
Cynops chenggongensis	170	Cynops chenggongensis	1	web019
Cynops cyanurus	170	Cynops cyanurus	1	web019
Ichthyosaura alpestris	170	Mesotriton alpestris	2	web019
Notophthalmus viridescens	170	Notophthalmus viridescens	1	web019
Triturus dobrogicus	170	Triturus dobrogicus	1	web019
Triturus karelinii	170	Triturus karelinii	1	web019
Tylototriton kweichowensis	170	Tylototriton kweichowensis	1	web019
Cynops chenggongensis	171	Cynops chenggongensis	1	web019
Cynops orientalis	171	Cynops orientalis	1	web019
Neurergus kaiseri	171	Neurergus kaiseri	1	web019
Notophthalmus viridescens	171	Notophthalmus viridescens	1	web019
Paramesotriton labiatus	171	Pachytriton labiatus	1	web019
Pleurodeles waltl	171	Pleurodeles waltl	1	web019
Cynops ensicauda	172	Cynops ensicauda	1	web019
Notophthalmus viridescens	172	Notophthalmus viridescens	1	web019
Notophthalmus viridescens	173	Notophthalmus viridescens	1	web019
Pleurodeles waltl	173	Pleurodeles waltl	1	web019
Tylototriton shanjing	173	Tylototriton shanjing	1	web019
Ichthyosaura alpestris	174	Mesotriton alpestris	2	web019
Neurergus kaiseri	174	Neurergus kaiseri	1	web019
Notophthalmus viridescens	174	Notophthalmus viridescens	1	web019
Triturus carnifex	174	Triturus carnifex	1	web019
Salamandra salamandra	174	Salamandra salamandra	1	web019
Cynops orientalis	175	Cynops orientalis	1	web019
Ichthyosaura alpestris	175	Mesotriton alpestris	2	web019
Notophthalmus viridescens	175	Notophthalmus viridescens	1	web019
Pleurodeles waltl	175	Pleurodeles waltl	1	web019
Eurycea guttolineata	176	Eurycea guttolineata	1	web019
Notophthalmus viridescens	176	Notophthalmus viridescens	1	web019
Triturus marmoratus	176	Triturus marmoratus	1	web019
Salamandra salamandra	176	Salamandra salamandra	1	web019
Cynops orientalis	177	Cynops orientalis	1	web019
Ichthyosaura alpestris	177	Mesotriton alpestris	2	web019
Lissotriton vulgaris	177	Lissotriton vulgaris	1	web019
Notophthalmus viridescens	177	Notophthalmus viridescens	1	web019
Cynops ensicauda	178	Cynops ensicauda	1	web019
Ichthyosaura alpestris	178	Mesotriton alpestris	2	web019
Notophthalmus viridescens	178	Notophthalmus viridescens	1	web019
Tylototriton kweichowensis	178	Tylototriton kweichowensis	1	web019
Ambystoma andersoni	179	Ambystoma andersoni	1	web019
Necturus maculosus	179	Necturus maculosus	1	web019
Notophthalmus viridescens	179	Notophthalmus viridescens	1	web019
Triturus dobrogicus	179	Triturus dobrogicus	1	web019
Neurergus kaiseri	18	Neurergus kaiseri	1	web019
Notophthalmus viridescens	18	Notophthalmus viridescens	1	web019
Ommatotriton ophryticus	18	Ommatotriton ophryticus	1	web019
Notophthalmus viridescens	180	Notophthalmus viridescens	1	web019
Notophthalmus viridescens	181	Notophthalmus viridescens	1	web019
Taricha granulosa	181	Taricha granulosa	1	web019
Ichthyosaura alpestris	182	Mesotriton alpestris	2	web019
Lissotriton vulgaris	182	Lissotriton vulgaris	1	web019
Notophthalmus viridescens	182	Notophthalmus viridescens	1	web019
Triturus karelinii	182	Triturus karelinii	1	web019
Xenopus laevis	183	Xenopus laevis	1	web019
Aneides lugubris	183	Aneides lugubris	1	web019
Cynops orientalis	183	Cynops orientalis	1	web019
Notophthalmus viridescens	183	Notophthalmus viridescens	1	web019
Notophthalmus viridescens	184	Notophthalmus viridescens	1	web019
Notophthalmus viridescens	185	Notophthalmus viridescens	1	web019
Notophthalmus viridescens	186	Notophthalmus viridescens	1	web019
Notophthalmus viridescens	187	Notophthalmus viridescens	1	web019
Notophthalmus viridescens	188	Notophthalmus viridescens	1	web019
Ambystoma andersoni	189	Ambystoma andersoni	1	web019
Cynops orientalis	189	Cynops orientalis	1	web019
Notophthalmus viridescens	189	Notophthalmus viridescens	1	web019
Lissotriton montandoni	19	Lissotriton montandoni	2	web019
Notophthalmus viridescens	19	Notophthalmus viridescens	1	web019
Cynops orientalis	190	Cynops orientalis	1	web019
Notophthalmus viridescens	190	Notophthalmus viridescens	1	web019
Paramesotriton chinensis	190	Paramesotriton chinensis	1	web019
Taricha granulosa	190	Taricha granulosa	1	web019
Xenopus laevis	2	Xenopus laevis	1	web019
Ambystoma mavortium	2	Ambystoma mavortium	1	web019
Cynops cyanurus	2	Cynops cyanurus	1	web019
Notophthalmus viridescens	2	Notophthalmus viridescens	1	web019
Theloderma stellatum	20	Theloderma stellatum	1	web019
Notophthalmus viridescens	20	Notophthalmus viridescens	1	web019
Neurergus kaiseri	21	Neurergus kaiseri	1	web019
Notophthalmus viridescens	21	Notophthalmus viridescens	1	web019
Triturus marmoratus	21	Triturus marmoratus	1	web019
Tylototriton taliangensis	21	Tylototriton taliangensis	1	web019
Tylototriton verrucosus	21	Tylototriton verrucosus	1	web019
Ambystoma andersoni	22	Ambystoma andersoni	1	web019
Ichthyosaura alpestris	22	Ichthyosaura alpestris	1	web019
Notophthalmus viridescens	22	Notophthalmus viridescens	1	web019
Triturus marmoratus	22	Triturus marmoratus	1	web019
Echinotriton andersoni	23	Echinotriton andersoni	1	web019
Notophthalmus viridescens	23	Notophthalmus viridescens	1	web019
Tylototriton verrucosus	23	Tylototriton verrucosus	1	web019
Mantella aurantiaca	24	Mantella aurantiaca	1	web019
Notophthalmus viridescens	24	Notophthalmus viridescens	1	web019
Tylototriton shanjing	24	Tylototriton shanjing	1	web019
Theloderma stellatum	25	Theloderma stellatum	1	web019
Cynops orientalis	25	Cynops orientalis	1	web019
Lissotriton montandoni	25	Lissotriton montandoni	2	web019
Neurergus kaiseri	25	Neurergus kaiseri	1	web019
Notophthalmus viridescens	25	Notophthalmus viridescens	1	web019
Bombina orientalis	26	Bombina orientalis	1	web019
Pipa pipa	26	Pipa pipa	1	web019
Neurergus crocatus	26	Neurergus crocatus	1	web019
Notophthalmus viridescens	26	Notophthalmus viridescens	1	web019
Notophthalmus viridescens	27	Notophthalmus viridescens	1	web019
Dendrobates leucomelas	28	Dendrobates leucomelas	1	web019
Notophthalmus viridescens	28	Notophthalmus viridescens	1	web019
Ichthyosaura alpestris	29	Mesotriton alpestris	2	web019
Notophthalmus viridescens	29	Notophthalmus viridescens	1	web019
Tylototriton verrucosus	29	Tylototriton verrucosus	1	web019
Ambystoma maculatum	3	Ambystoma maculatum	1	web019
Hynobius dunni	3	Hynobius dunni	1	web019
Neurergus kaiseri	3	Neurergus kaiseri	1	web019
Notophthalmus viridescens	3	Notophthalmus viridescens	1	web019
Tylototriton shanjing	3	Tylototriton shanjing	1	web019
Tylototriton ziegleri	3	Tylototriton ziegleri	1	web019
Bombina orientalis	30	Bombina orientalis	1	web019
Odorrana livida	30	Odorrana livida	2	web019
Notophthalmus viridescens	30	Notophthalmus viridescens	1	web019
Tylototriton verrucosus	30	Tylototriton verrucosus	1	web019
Epipedobates tricolor	31	Epipedobates tricolor	1	web019
Ambystoma andersoni	31	Ambystoma andersoni	1	web019
Notophthalmus viridescens	31	Notophthalmus viridescens	1	web019
Tylototriton shanjing	31	Tylototriton shanjing	1	web019
Hyla chrysoscelis	32	Hyla chrysoscelis	1	web019
Laotriton laoensis	32	Laotriton laoensis	1	web019
Notophthalmus viridescens	32	Notophthalmus viridescens	1	web019
Pleurodeles waltl	32	Pleurodeles waltl	1	web019
Tylototriton verrucosus	32	Tylototriton verrucosus	1	web019
Neurergus kaiseri	33	Neurergus kaiseri	1	web019
Notophthalmus viridescens	33	Notophthalmus viridescens	1	web019
Triturus marmoratus	33	Triturus marmoratus	1	web019
Laotriton laoensis	34	Laotriton laoensis	1	web019
Notophthalmus viridescens	34	Notophthalmus viridescens	1	web019
Pleurodeles waltl	34	Pleurodeles waltl	1	web019
Notophthalmus viridescens	35	Notophthalmus viridescens	1	web019
Triturus marmoratus	35	Triturus marmoratus	1	web019
Bombina maxima	36	Bombina maxima	1	web019
Ichthyosaura alpestris	36	Ichthyosaura alpestris	1	web019
Notophthalmus viridescens	36	Notophthalmus viridescens	1	web019
Ambystoma tigrinum	37	Ambystoma tigrinum	1	web019
Cynops orientalis	37	Cynops orientalis	1	web019
Ichthyosaura alpestris	37	Ichthyosaura alpestris	1	web019
Notophthalmus viridescens	37	Notophthalmus viridescens	1	web019
Pleurodeles waltl	37	Pleurodeles waltl	1	web019
Cynops orientalis	38	Cynops orientalis	1	web019
Neurergus kaiseri	38	Neurergus kaiseri	1	web019
Notophthalmus viridescens	38	Notophthalmus viridescens	1	web019
Xenopus muelleri	39	Xenopus muelleri	1	web019
Notophthalmus viridescens	39	Notophthalmus viridescens	1	web019
Cynops orientalis	4	Cynops orientalis	1	web019
Lissotriton italicus	4	Lissotriton italicus	2	web019
Notophthalmus viridescens	4	Notophthalmus viridescens	1	web019
Pleurodeles waltl	4	Pleurodeles waltl	1	web019
Triturus pygmaeus	4	Triturus pygmaeus	1	web019
Dendrobates leucomelas	40	Dendrobates leucomelas	1	web019
Dendrobates tinctorius	40	Dendrobates azureus	1	web019
Notophthalmus viridescens	40	Notophthalmus viridescens	1	web019
Lissotriton montandoni	41	Lissotriton montandoni	2	web019
Notophthalmus viridescens	41	Notophthalmus viridescens	1	web019
Hyloxalus azureiventris	42	Hyloxalus azureiventris	1	web019
Notophthalmus viridescens	42	Notophthalmus viridescens	1	web019
Tylototriton verrucosus	42	Tylototriton verrucosus	1	web019
Cynops orientalis	43	Cynops orientalis	1	web019
Notophthalmus viridescens	43	Notophthalmus viridescens	1	web019
Triturus carnifex	43	Triturus carnifex	1	web019
Cynops pyrrhogaster	44	Cynops pyrrhogaster	1	web019
Notophthalmus viridescens	44	Notophthalmus viridescens	1	web019
Ichthyosaura alpestris	45	Mesotriton alpestris	2	web019
Neurergus kaiseri	45	Neurergus kaiseri	1	web019
Notophthalmus viridescens	45	Notophthalmus viridescens	1	web019
Ommatotriton ophryticus	45	Ommatotriton ophryticus	1	web019
Cynops orientalis	46	Cynops orientalis	1	web019
Neurergus kaiseri	46	Neurergus kaiseri	1	web019
Notophthalmus viridescens	46	Notophthalmus viridescens	1	web019
Triturus carnifex	46	Triturus carnifex	1	web019
Notophthalmus viridescens	47	Notophthalmus viridescens	1	web019
Pleurodeles waltl	47	Pleurodeles waltl	1	web019
Notophthalmus viridescens	48	Notophthalmus viridescens	1	web019
Cynops orientalis	49	Cynops orientalis	1	web019
Notophthalmus viridescens	49	Notophthalmus viridescens	1	web019
Hynobius dunni	5	Hynobius dunni	1	web019
Notophthalmus viridescens	5	Notophthalmus viridescens	1	web019
Tylototriton verrucosus	5	Tylototriton verrucosus	1	web019
Notophthalmus viridescens	50	Notophthalmus viridescens	1	web019
Triturus dobrogicus	50	Triturus dobrogicus	1	web019
Tylototriton verrucosus	50	Tylototriton verrucosus	1	web019
Notophthalmus viridescens	51	Notophthalmus viridescens	1	web019
Notophthalmus viridescens	52	Notophthalmus viridescens	1	web019
Hynobius dunni	53	Hynobius dunni	1	web019
Cynops orientalis	53	Cynops orientalis	1	web019
Notophthalmus viridescens	53	Notophthalmus viridescens	1	web019
Triturus marmoratus	53	Triturus marmoratus	1	web019
Tylototriton verrucosus	53	Tylototriton verrucosus	1	web019
Cynops orientalis	54	Cynops orientalis	1	web019
Notophthalmus viridescens	54	Notophthalmus viridescens	1	web019
Paramesotriton hongkongensis	54	Paramesotriton hongkongensis	1	web019
Tylototriton verrucosus	54	Tylototriton verrucosus	1	web019
Xenopus laevis	55	Xenopus laevis	1	web019
Ambystoma mavortium	55	Ambystoma mavortium	1	web019
Ichthyosaura alpestris	55	Mesotriton alpestris	2	web019
Notophthalmus viridescens	55	Notophthalmus viridescens	1	web019
Triturus marmoratus	55	Triturus marmoratus	1	web019
Notophthalmus viridescens	56	Notophthalmus viridescens	1	web019
Tylototriton verrucosus	56	Tylototriton verrucosus	1	web019
Notophthalmus viridescens	57	Notophthalmus viridescens	1	web019
Triturus marmoratus	57	Triturus marmoratus	1	web019
Tylototriton kweichowensis	57	Tylototriton kweichowensis	1	web019
Notophthalmus viridescens	58	Notophthalmus viridescens	1	web019
Paramesotriton hongkongensis	58	Paramesotriton hongkongensis	1	web019
Dendrobates leucomelas	59	Dendrobates leucomelas	1	web019
Hynobius dunni	59	Hynobius dunni	1	web019
Neurergus kaiseri	59	Neurergus kaiseri	1	web019
Notophthalmus viridescens	59	Notophthalmus viridescens	1	web019
Pleurodeles waltl	59	Pleurodeles waltl	1	web019
Neurergus kaiseri	6	Neurergus kaiseri	1	web019
Notophthalmus viridescens	6	Notophthalmus viridescens	1	web019
Triturus marmoratus	6	Triturus marmoratus	1	web019
Tylototriton verrucosus	6	Tylototriton verrucosus	1	web019
Notophthalmus viridescens	60	Notophthalmus viridescens	1	web019
Ambystoma andersoni	61	Ambystoma andersoni	1	web019
Ambystoma dumerilii	61	Ambystoma dumerilii	1	web019
Ambystoma mavortium	61	Ambystoma mavortium	1	web019
Ambystoma talpoideum	61	Ambystoma talpoideum	1	web019
Hynobius nigrescens	61	Hynobius nigrescens	1	web019
Neurergus kaiseri	61	Neurergus kaiseri	1	web019
Notophthalmus viridescens	61	Notophthalmus viridescens	1	web019
Paramesotriton chinensis	61	Paramesotriton chinensis	1	web019
Triturus macedonicus	61	Triturus macedonicus	1	web019
Triturus marmoratus	61	Triturus marmoratus	1	web019
Tylototriton shanjing	61	Tylototriton shanjing	1	web019
Salamandra salamandra	61	Salamandra salamandra	1	web019
Ambystoma andersoni	62	Ambystoma andersoni	1	web019
Ambystoma dumerilii	62	Ambystoma dumerilii	1	web019
Ambystoma mavortium	62	Ambystoma mavortium	1	web019
Ambystoma talpoideum	62	Ambystoma talpoideum	1	web019
Hynobius nigrescens	62	Hynobius nigrescens	1	web019
Neurergus kaiseri	62	Neurergus kaiseri	1	web019
Notophthalmus viridescens	62	Notophthalmus viridescens	1	web019
Paramesotriton chinensis	62	Paramesotriton chinensis	1	web019
Triturus macedonicus	62	Triturus macedonicus	1	web019
Triturus marmoratus	62	Triturus marmoratus	1	web019
Tylototriton shanjing	62	Tylototriton shanjing	1	web019
Salamandra salamandra	62	Salamandra salamandra	1	web019
Agalychnis annae	63	Agalychnis annae	1	web019
Ambystoma mavortium	63	Ambystoma mavortium	1	web019
Cynops ensicauda	63	Cynops ensicauda	1	web019
Notophthalmus viridescens	63	Notophthalmus viridescens	1	web019
Tylototriton kweichowensis	63	Tylototriton kweichowensis	1	web019
Tylototriton shanjing	63	Tylototriton shanjing	1	web019
Salamandra salamandra	63	Salamandra salamandra	1	web019
Bombina orientalis	64	Bombina orientalis	1	web019
Ambystoma tigrinum	64	Ambystoma tigrinum	1	web019
Cynops ensicauda	64	Cynops ensicauda	1	web019
Ichthyosaura alpestris	64	Ichthyosaura alpestris	1	web019
Notophthalmus viridescens	64	Notophthalmus viridescens	1	web019
Triturus carnifex	64	Triturus carnifex	1	web019
Triturus cristatus	64	Triturus cristatus	1	web019
Tylototriton shanjing	64	Tylototriton shanjing	1	web019
Salamandra algira	64	Salamandra algira	1	web019
Bombina variegata	65	Bombina variegata	1	web019
Cynops cyanurus	65	Cynops cyanurus	1	web019
Notophthalmus viridescens	65	Notophthalmus viridescens	1	web019
Tylototriton verrucosus	65	Tylototriton verrucosus	1	web019
Siren intermedia	65	Siren intermedia	1	web019
Bombina maxima	66	Bombina maxima	1	web019
Bombina variegata	66	Bombina variegata	1	web019
Neurergus kaiseri	66	Neurergus kaiseri	1	web019
Notophthalmus viridescens	66	Notophthalmus viridescens	1	web019
Triturus carnifex	66	Triturus carnifex	1	web019
Triturus dobrogicus	66	Triturus dobrogicus	1	web019
Tylototriton shanjing	66	Tylototriton shanjing	1	web019
Tylototriton wenxianensis	66	Tylototriton wenxianensis	1	web019
Bombina maxima	67	Bombina maxima	1	web019
Bombina orientalis	67	Bombina orientalis	1	web019
Ambystoma mexicanum	67	Ambystoma mexicanum	1	web019
Ambystoma opacum	67	Ambystoma opacum	1	web019
Batrachoseps attenuatus	67	Batrachoseps attenuatus	1	web019
Notophthalmus viridescens	67	Notophthalmus viridescens	1	web019
Paramesotriton labiatus	67	Pachytriton labiatus	1	web019
Taricha granulosa	67	Taricha granulosa	1	web019
Salamandra salamandra	67	Salamandra salamandra	1	web019
Hynobius dunni	68	Hynobius dunni	1	web019
Cynops ensicauda	68	Cynops ensicauda	1	web019
Cynops orientalis	68	Cynops orientalis	1	web019
Cynops pyrrhogaster	68	Cynops pyrrhogaster	1	web019
Ichthyosaura alpestris	68	Triturus alpestris	1	web019
Lissotriton boscai	68	Lissotriton boscai	1	web019
Notophthalmus viridescens	68	Notophthalmus viridescens	1	web019
Triturus cristatus	68	Triturus cristatus	1	web019
Salamandra salamandra	68	Salamandra salamandra	1	web019
Bombina maxima	69	Bombina maxima	1	web019
Bombina variegata	69	Bombina variegata	1	web019
Cynops orientalis	69	Cynops orientalis	1	web019
Laotriton laoensis	69	Laotriton laoensis	1	web019
Neurergus kaiseri	69	Neurergus kaiseri	1	web019
Notophthalmus viridescens	69	Notophthalmus viridescens	1	web019
Taricha granulosa	69	Taricha granulosa	1	web019
Triturus carnifex	69	Triturus carnifex	1	web019
Triturus marmoratus	69	Triturus marmoratus	1	web019
Tylototriton kweichowensis	69	Tylototriton kweichowensis	1	web019
Notophthalmus viridescens	7	Notophthalmus viridescens	1	web019
Triturus macedonicus	7	Triturus macedonicus	1	web019
Tylototriton verrucosus	7	Tylototriton verrucosus	1	web019
Bombina maxima	70	Bombina maxima	1	web019
Bombina variegata	70	Bombina variegata	1	web019
Epipedobates anthonyi	70	Epipedobates anthonyi	1	web019
Cynops ensicauda	70	Cynops ensicauda	1	web019
Ichthyosaura alpestris	70	Triturus alpestris	1	web019
Neurergus kaiseri	70	Neurergus kaiseri	1	web019
Notophthalmus viridescens	70	Notophthalmus viridescens	1	web019
Pleurodeles waltl	70	Pleurodeles waltl	1	web019
Triturus karelinii	70	Triturus karelinii	1	web019
Tylototriton kweichowensis	70	Tylototriton kweichowensis	1	web019
Ichthyosaura alpestris	71	Triturus alpestris	1	web019
Notophthalmus viridescens	71	Notophthalmus viridescens	1	web019
Notophthalmus viridescens	72	Notophthalmus viridescens	1	web019
Notophthalmus viridescens	73	Notophthalmus viridescens	1	web019
Notophthalmus viridescens	74	Notophthalmus viridescens	1	web019
Notophthalmus viridescens	75	Notophthalmus viridescens	1	web019
Notophthalmus viridescens	76	Notophthalmus viridescens	1	web019
Notophthalmus viridescens	77	Notophthalmus viridescens	1	web019
Notophthalmus viridescens	78	Notophthalmus viridescens	1	web019
Notophthalmus viridescens	79	Notophthalmus viridescens	1	web019
Bufotes viridis	8	Bufo viridis	1	web019
Epidalea calamita	8	Bufo calamita	1	web019
Cynops orientalis	8	Cynops orientalis	1	web019
Notophthalmus viridescens	8	Notophthalmus viridescens	1	web019
Triturus macedonicus	8	Triturus macedonicus	1	web019
Triturus marmoratus	8	Triturus marmoratus	1	web019
Salamandra salamandra	8	Salamandra salamandra	1	web019
Notophthalmus viridescens	80	Notophthalmus viridescens	1	web019
Notophthalmus viridescens	81	Notophthalmus viridescens	1	web019
Notophthalmus viridescens	82	Notophthalmus viridescens	1	web019
Notophthalmus viridescens	83	Notophthalmus viridescens	1	web019
Notophthalmus viridescens	84	Notophthalmus viridescens	1	web019
Triturus marmoratus	84	Triturus marmoratus	1	web019
Notophthalmus viridescens	85	Notophthalmus viridescens	1	web019
Triturus marmoratus	85	Triturus marmoratus	1	web019
Neurergus kaiseri	86	Neurergus kaiseri	1	web019
Notophthalmus viridescens	86	Notophthalmus viridescens	1	web019
Cynops cyanurus	87	Hypselotriton cyanurus	1	web019
Cynops pyrrhogaster	87	Cynops pyrrhogaster	1	web019
Ichthyosaura alpestris	87	Ichthyosaura alpestris	1	web019
Neurergus kaiseri	87	Neurergus kaiseri	1	web019
Notophthalmus viridescens	87	Notophthalmus viridescens	1	web019
Triturus marmoratus	87	Triturus marmoratus	1	web019
Cynops orientalis	88	Cynops orientalis	1	web019
Neurergus kaiseri	88	Neurergus kaiseri	1	web019
Notophthalmus viridescens	88	Notophthalmus viridescens	1	web019
Pleurodeles waltl	88	Pleurodeles waltl	1	web019
Siren lacertina	88	Siren lacertina	1	web019
Notophthalmus viridescens	89	Notophthalmus viridescens	1	web019
Bombina maxima	9	Bombina maxima	1	web019
Epidalea calamita	9	Bufo calamita	1	web019
Neurergus kaiseri	9	Neurergus kaiseri	1	web019
Notophthalmus viridescens	9	Notophthalmus viridescens	1	web019
Ommatotriton ophryticus	9	Ommatotriton ophryticus	1	web019
Cynops pyrrhogaster	90	Cynops pyrrhogaster	1	web019
Notophthalmus viridescens	90	Notophthalmus viridescens	1	web019
Aneides aeneus	91	Aneides aeneus	1	web019
Neurergus kaiseri	91	Neurergus kaiseri	1	web019
Notophthalmus viridescens	91	Notophthalmus viridescens	1	web019
Pleurodeles waltl	91	Pleurodeles waltl	1	web019
Laotriton laoensis	92	Laotriton laoensis	1	web019
Notophthalmus viridescens	92	Notophthalmus viridescens	1	web019
Tylototriton yangi	92	Tylototriton yangi	1	web019
Notophthalmus viridescens	93	Notophthalmus viridescens	1	web019
Pleurodeles waltl	93	Pleurodeles waltl	1	web019
Tylototriton yangi	93	Tylototriton yangi	1	web019
Laotriton laoensis	94	Laotriton laoensis	1	web019
Notophthalmus viridescens	94	Notophthalmus viridescens	1	web019
Neurergus kaiseri	95	Neurergus kaiseri	1	web019
Notophthalmus viridescens	95	Notophthalmus viridescens	1	web019
Cynops pyrrhogaster	96	Cynops pyrrhogaster	1	web019
Notophthalmus viridescens	96	Notophthalmus viridescens	1	web019
Tylototriton verrucosus	96	Tylototriton verrucosus	1	web019
Notophthalmus viridescens	97	Notophthalmus viridescens	1	web019
Cynops ensicauda	98	Cynops ensicauda	1	web019
Notophthalmus viridescens	98	Notophthalmus viridescens	1	web019
Notophthalmus viridescens	99	Notophthalmus viridescens	1	web019
Triturus pygmaeus	99	Triturus pygmaeus	1	web019
Bombina orientalis	1	Bombina orientalis	1	web020
Ceratophrys cranwelli	1	Ceratophrys cranwelli	1	web020
Dendrobates leucomelas	1	Dendrobates leucomelas	1	web020
Oophaga pumilio	1	Dendrobates pumilio	1	web020
Agalychnis callidryas	1	Agalychnis callidryas	1	web020
Phyllomedusa sauvagii	1	Phyllomedusa sauvagii	1	web020
Pyxicephalus adspersus	1	Pyxicephalus adspersus	1	web020
Ambystoma mexicanum	1	Ambystoma mexicanum	1	web020
Ambystoma tigrinum	1	Ambystoma tigrinum	1	web020
Hymenochirus curtipes	1	Hymenochirus curtipes	1	web022
Ceratophrys cornuta	1	Ceratophrys cornuta	1	web024
Ceratophrys cranwelli	1	Ceratophrys cranwelli	1	web024
Dendrobates leucomelas	1	Dendrobates leucomelas	1	web024
Dendrobates tinctorius	1	Dendrobates tinctorius	2	web024
Oophaga pumilio	1	Oophaga pumilio	1	web024
Hyloxalus azureiventris	1	Hyloxalus azureiventris	1	web024
Amphiuma means	1	Amphiuma means	1	web024
Hynobius nigrescens	1	Hynobius nigrescens	1	web024
Epipedobates anthonyi	1	Epipedobates anthonyi	1	web025
Dendrobates auratus	1	Dendrobates auratus	1	web025
Dendrobates tinctorius	1	Dendrobates tinctorius	2	web025
Dendrobates truncatus	1	Dendrobates truncatus	1	web025
Oophaga pumilio	1	Oophaga pumilio	1	web025
Phyllobates bicolor	1	Phyllobates bicolor	1	web025
Phyllobates terribilis	1	Phyllobates terribilis	1	web025
Phyllobates vittatus	1	Phyllobates vittatus	1	web025
Ranitomeya benedicta	1	Ranitomeya benedicta	1	web025
Ranitomeya imitator	1	Ranitomeya imitator	1	web025
Ranitomeya reticulata	1	Ranitomeya reticulata	1	web025
Ranitomeya sirensis	1	Ranitomeya sirensis	1	web025
Ranitomeya vanzolinii	1	Ranitomeya vanzolinii	1	web025
Ranitomeya variabilis	1	Ranitomeya variabilis	1	web025
Ranitomeya ventrimaculata	1	Ranitomeya ventrimaculata	1	web025
Anotheca spinosa	1	Anotheca spinosa	1	web025
Agalychnis callidryas	1	Agalychnis callidryas	1	web025
Agalychnis spurrelli	1	Agalychnis spurrelli	1	web025
Theloderma corticale	1	Theloderma corticale	1	web025
Bombina orientalis	1	Bombina orientalis	1	web027
Ceratophrys cornuta	1	Ceratophrys cornuta	1	web027
Ceratophrys cranwelli	1	Ceratophrys cranwelli	1	web027
Hyla arborea	1	Hyla arborea	1	web027
Trachycephalus nigromaculatus	1	Trachycephalus nigromaculatus	1	web027
Kaloula pulchra	1	Kaloula pulchra	1	web027
Pipa parva	1	Pipa parva	1	web027
Ambystoma maculatum	1	Ambystoma maculatum	1	web027
Ichthyosaura alpestris	1	Ichthyosaura alpestris	1	web027
Leptopelis vermiculatus	1	Leptopelis vermiculatus	1	web034
Bombina microdeladigitora	1	Bombina microdeladigitora	1	web034
Bombina orientalis	1	Bombina orientalis	1	web034
Bombina variegata	1	Bombina variegata	1	web034
Anaxyrus americanus	1	Anaxyrus americanus	1	web034
Anaxyrus cognatus	1	Anaxyrus cognatus	2	web034
Anaxyrus debilis	1	Anaxyrus debilis	1	web034
Anaxyrus quercicus	1	Anaxyrus quercicus	2	web034
Anaxyrus speciosus	1	Anaxyrus speciosus	2	web034
Anaxyrus terrestris	1	Bufo terrestris	1	web034
Duttaphrynus melanostictus	1	Duttaphrynus melanostictus	2	web034
Incilius alvarius	1	Incilius alvarius	2	web034
Incilius marmoreus	1	Incilius marmoreus	2	web034
Phrynoidis aspera	1	Phrynoidis aspera	3	web034
Rhinella margaritifera	1	Rhinella margaritifera	1	web034
Rhinella marina	1	Rhinella marina	2	web034
Sclerophrys regularis	1	Amietophrynus regularis	2	web034
Ceratophrys cornuta	1	Ceratophrys cornuta	1	web034
Ceratophrys cranwelli	1	Ceratophrys cranwelli	1	web034
Ceratophrys ornata	1	Ceratophrys ornata	1	web034
Epipedobates anthonyi	1	Epipedobates anthonyi	1	web034
Epipedobates tricolor	1	Epipedobates tricolor	1	web034
Dendrobates auratus	1	Dendrobates auratus	1	web034
Dendrobates leucomelas	1	Dendrobates leucomelas	1	web034
Dendrobates tinctorius	1	Dendrobates tinctorius	2	web034
Oophaga pumilio	1	Oophaga pumilio	1	web034
Phyllobates vittatus	1	Phyllobates vittatus	1	web034
Hoplobatrachus tigerinus	1	Bufo typhonius	1	web034
Boana calcarata	1	Hyla calcarata	1	web034
Dendropsophus ebraccatus	1	Dendropsophus ebraccatus	1	web034
Dendropsophus leucophyllatus	1	Dendropsophus leucophyllatus	1	web034
Hyla cinerea	1	Hyla cinerea	1	web034
Hyla squirella	1	Hyla squirella	1	web034
Hyla versicolor	1	Hyla versicolor	1	web034
Trachycephalus resinifictrix	1	Trachycephalus resinifictrix	1	web034
Litoria caerulea	1	Litoria caerulea	1	web034
Litoria infrafrenata	1	Litoria infrafrenata	1	web034
Litoria thesaurensis	1	Litoria thesaurensis	1	web034
Agalychnis callidryas	1	Agalychnis callidryas	1	web034
Agalychnis spurrelli	1	Agalychnis spurrelli	1	web034
Phyllomedusa hypochondrialis	1	Phyllomedusa hypochondrialis	1	web034
Phyllomedusa tomopterna	1	Phyllomedusa tomopterna	1	web034
Hyperolius fusciventris	1	Hyperolius fusciventris	1	web034
Kassina senegalensis	1	Kassina senegalensis	1	web034
Kaloula pulchra	1	Kaloula pulchra	1	web034
Microhyla pulchra	1	Microhyla pulchra	1	web034
Scaphiophryne marmorata	1	Scaphiophryne marmorata	1	web034
Scaphiophryne obscura	1	Scaphiophryne	1	web034
Scaphiophryne verrucosa	1	Scaphiophryne	1	web034
Polypedates leucomystax	1	Polypedates leucomystax	1	web034
Polypedates teraiensis	1	Polypedates leucomystax	1	web034
Ambystoma maculatum	1	Ambystoma maculatum	1	web034
Ambystoma mavortium	1	Ambystoma mavortium	1	web034
Ambystoma mexicanum	1	Ambystoma mexicanum	1	web034
Ambystoma opacum	1	Ambystoma opacum	1	web034
Ambystoma tigrinum	1	Ambystoma tigrinum	1	web034
Hynobius dunni	1	Hynobius dunni	1	web034
Cynops orientalis	1	Cynops orientalis	2	web034
Triturus carnifex	1	Triturus carnifex	1	web034
Triturus marmoratus	1	Triturus marmoratus	1	web034
Tylototriton shanorum	1	Tylototriton shanorum	1	web034
Leptopelis nordequatorialis	1	Leptopelis nordequatorialis	1	web035
Anaxyrus terrestris	1	Bufo terrestris	1	web035
Bufotes boulengeri	1	Bufotes boulengeri	1	web035
Bufotes viridis	1	Bufotes viridis	1	web035
Sclerophrys regularis	1	Bufo regularis	1	web035
Ceratophrys cranwelli	1	Ceratophrys cranwelli	1	web035
Ceratophrys joazeirensis	1	Ceratophrys joazeirensis	1	web035
Ceratophrys ornata	1	Ceratophrys ornata	1	web035
Adelphobates galactonotus	1	Dendrobates galactonotus	1	web035
Dendrobates truncatus	1	Dendrobates truncatus	1	web035
Anotheca spinosa	1	Anotheca spinosa	1	web035
Hyla cinerea	1	Hyla cinerea	1	web035
Smilisca baudinii	1	Smilisca baudinii	1	web035
Litoria caerulea	1	Litoria caerulea	1	web035
Agalychnis spurrelli	1	Agalychnis spurrelli	1	web035
Kassina senegalensis	1	Kassina senegalensis	1	web035
Phrynomantis microps	1	Phrynomantis microps	1	web035
Scaphiophryne madagascariensis	1	Scaphiophryne madagascariensis	1	web035
Scaphiophryne obscura	1	Scaphiophryne	1	web035
Scaphiophryne verrucosa	1	Scaphiophryne	1	web035
Pipa parva	1	Pipa parva	1	web035
Pipa pipa	1	Pipa pipa	1	web035
Xenopus laevis	1	Xenopus laevis	1	web035
Pyxicephalus adspersus	1	Pyxicephalus adspersus	1	web035
Ambystoma mexicanum	1	Ambystoma mexicanum	1	web035
Pleurodeles waltl	1	Pleurodeles waltl	1	web035
Ceratophrys cranwelli	1	Ceratophrys cranwelli	1	web036
Hyla cinerea	1	Hyla cinerea	1	web036
Litoria caerulea	1	Litoria caerulea	1	web036
Agalychnis callidryas	1	Agalychnis callidryas	1	web036
Kassina senegalensis	1	Kassina senegalensis	1	web036
Sclerophrys regularis	1	Bufo regularis	1	web038
Ceratophrys cranwelli	1	Ceratophrys cranwelli	1	web038
Ceratophrys ornata	1	Ceratophrys ornata	1	web038
Dendrobates auratus	1	Dendrobates auratus	1	web038
Dendrobates leucomelas	1	Dendrobates leucomelas	1	web038
Litoria caerulea	1	Litoria caerulea	1	web038
Agalychnis callidryas	1	Agalychnis callidryas	1	web038
Dyscophus guineti	1	Dyscophus guineti	1	web038
Dyscophus insularis	1	Dyscophus insularis	1	web038
Pyxicephalus adspersus	1	Pyxicephalus adspersus	1	web038
Ambystoma tigrinum	1	Ambystoma tigrinum	1	web038
Ceratophrys cranwelli	1	Ceratophrys cranwelli	1	web039
Ceratophrys ornata	1	Ceratophrys ornata	1	web039
Dendrobates auratus	1	Dendrobates auratus	1	web039
Dendrobates leucomelas	1	Dendrobates leucomelas	1	web039
Ameerega silverstonei	10	Ameerega silverstonei	1	web040
Adelphobates galactonotus	10	Adelphobates galactonotus	1	web040
Dendrobates auratus	10	Dendrobates auratus	1	web040
Dendrobates leucomelas	10	Dendrobates leucomelas	1	web040
Ranitomeya vanzolinii	10	Ranitomeya vanzolinii	1	web040
Heterixalus alboguttatus	10	Heterixalus alboguttatus	1	web040
Boophis erythrodactylus	10	Boophis erythrodactylus	1	web040
Mantella betsileo	10	Mantella betsileo	1	web040
Mantella crocea	10	Mantella crocea	1	web040
Mantella expectata	10	Mantella expectata	1	web040
Mantella laevigata	10	Mantella laevigata	1	web040
Mantella madagascariensis	10	Mantella madagascariensis	1	web040
Atelopus spumarius	11	Atelopus spumarius	1	web040
Adelphobates galactonotus	11	Adelphobates galactonotus	1	web040
Dendrobates auratus	11	Dendrobates auratus	1	web040
Oophaga pumilio	11	Oophaga pumilio	1	web040
Ranitomeya amazonica	11	Ranitomeya amazonica	1	web040
Ranitomeya variabilis	11	Ranitomeya variabilis	1	web040
Ranitomeya ventrimaculata	11	Ranitomeya ventrimaculata	1	web040
Hyloxalus azureiventris	11	Hyloxalus azureiventris	1	web040
Mantella nigricans	11	Mantella nigricans	1	web040
Mantella pulchra	11	Mantella pulchra	1	web040
Mantella viridis	11	Mantella viridis	1	web040
Ameerega bassleri	12	Ameerega bassleri	1	web040
Ameerega trivittata	12	Ameerega trivittata	1	web040
Dendrobates auratus	12	Dendrobates auratus	1	web040
Dendrobates tinctorius	12	Dendrobates tinctorius	1	web040
Dendrobates truncatus	12	Dendrobates truncatus	1	web040
Excidobates mysteriosus	12	Excidobates mysteriosus	1	web040
Oophaga pumilio	12	Oophaga pumilio	1	web040
Ranitomeya fantastica	12	Ranitomeya fantastica	1	web040
Ranitomeya imitator	12	Ranitomeya imitator	1	web040
Ranitomeya summersi	12	Ranitomeya summersi	1	web040
Ameerega pepperi	13	Ameerega pepperi	1	web040
Ameerega trivittata	13	Ameerega trivittata	1	web040
Dendrobates auratus	13	Dendrobates auratus	1	web040
Oophaga pumilio	13	Oophaga pumilio	1	web040
Ranitomeya imitator	13	Ranitomeya imitator	1	web040
Ranitomeya reticulata	13	Ranitomeya reticulata	1	web040
Cynops orientalis	14	Cynops orientalis	1	web040
Tylototriton shanjing	14	Tylototriton shanjing	1	web040
Cynops orientalis	15	Cynops orientalis	1	web040
Tylototriton shanjing	15	Tylototriton shanjing	1	web040
Ceratophrys cranwelli	2	Ceratophrys cranwelli	1	web040
Epipedobates anthonyi	2	Epipedobates anthonyi	1	web040
Dendrobates auratus	2	Dendrobates auratus	1	web040
Dendrobates tinctorius	2	Dendrobates azureus	1	web040
Ranitomeya benedicta	2	Ranitomeya benedicta	1	web040
Agalychnis callidryas	2	Agalychnis callidryas	1	web040
Heterixalus madagascariensis	2	Heterixalus madagascariensis	1	web040
Boophis viridis	2	Boophis viridis	1	web040
Mantella aurantiaca	2	Mantella aurantiaca	1	web040
Mantella baroni	2	Mantella baroni	1	web040
Mantella bernhardi	2	Mantella bernhardi	1	web040
Ceratophrys cranwelli	3	Ceratophrys cranwelli	1	web040
Epipedobates anthonyi	3	Epipedobates anthonyi	1	web040
Dendrobates auratus	3	Dendrobates auratus	1	web040
Dendrobates tinctorius	3	Dendrobates azureus	1	web040
Ranitomeya benedicta	3	Ranitomeya benedicta	1	web040
Agalychnis callidryas	3	Agalychnis callidryas	1	web040
Heterixalus madagascariensis	3	Heterixalus madagascariensis	1	web040
Boophis viridis	3	Boophis viridis	1	web040
Mantella aurantiaca	3	Mantella aurantiaca	1	web040
Mantella baroni	3	Mantella baroni	1	web040
Mantella bernhardi	3	Mantella bernhardi	1	web040
Ameerega silverstonei	4	Ameerega silverstonei	1	web040
Adelphobates galactonotus	4	Adelphobates galactonotus	1	web040
Dendrobates auratus	4	Dendrobates auratus	1	web040
Dendrobates leucomelas	4	Dendrobates leucomelas	1	web040
Ranitomeya vanzolinii	4	Ranitomeya vanzolinii	1	web040
Heterixalus alboguttatus	4	Heterixalus alboguttatus	1	web040
Boophis erythrodactylus	4	Boophis erythrodactylus	1	web040
Mantella betsileo	4	Mantella betsileo	1	web040
Mantella crocea	4	Mantella crocea	1	web040
Mantella expectata	4	Mantella expectata	1	web040
Mantella laevigata	4	Mantella laevigata	1	web040
Mantella madagascariensis	4	Mantella madagascariensis	1	web040
Atelopus spumarius	5	Atelopus spumarius	1	web040
Adelphobates galactonotus	5	Adelphobates galactonotus	1	web040
Dendrobates auratus	5	Dendrobates auratus	1	web040
Oophaga pumilio	5	Oophaga pumilio	1	web040
Ranitomeya amazonica	5	Ranitomeya amazonica	1	web040
Ranitomeya variabilis	5	Ranitomeya variabilis	1	web040
Ranitomeya ventrimaculata	5	Ranitomeya ventrimaculata	1	web040
Hyloxalus azureiventris	5	Hyloxalus azureiventris	1	web040
Mantella nigricans	5	Mantella nigricans	1	web040
Mantella pulchra	5	Mantella pulchra	1	web040
Mantella viridis	5	Mantella viridis	1	web040
Ameerega bassleri	6	Ameerega bassleri	1	web040
Ameerega trivittata	6	Ameerega trivittata	1	web040
Dendrobates auratus	6	Dendrobates auratus	1	web040
Dendrobates tinctorius	6	Dendrobates tinctorius	1	web040
Dendrobates truncatus	6	Dendrobates truncatus	1	web040
Excidobates mysteriosus	6	Excidobates mysteriosus	1	web040
Oophaga pumilio	6	Oophaga pumilio	1	web040
Ranitomeya fantastica	6	Ranitomeya fantastica	1	web040
Ranitomeya imitator	6	Ranitomeya imitator	1	web040
Ranitomeya summersi	6	Ranitomeya summersi	1	web040
Ameerega pepperi	7	Ameerega pepperi	1	web040
Ameerega trivittata	7	Ameerega trivittata	1	web040
Dendrobates auratus	7	Dendrobates auratus	1	web040
Oophaga pumilio	7	Oophaga pumilio	1	web040
Ranitomeya imitator	7	Ranitomeya imitator	1	web040
Ranitomeya reticulata	7	Ranitomeya reticulata	1	web040
Ceratophrys cranwelli	8	Ceratophrys cranwelli	1	web040
Epipedobates anthonyi	8	Epipedobates anthonyi	1	web040
Dendrobates auratus	8	Dendrobates auratus	1	web040
Dendrobates tinctorius	8	Dendrobates azureus	1	web040
Ranitomeya benedicta	8	Ranitomeya benedicta	1	web040
Agalychnis callidryas	8	Agalychnis callidryas	1	web040
[truncated: 3,519 more rows]
