# Supplementary material for: Gaps in global wildlife trade monitoring leave amphibians vulnerable
Source: eLife. 2021 Aug 12;10:e70086. doi: 10.7554/eLife.70086 (PMC8425949; doi:10.7554/eLife.70086)
Supplement: Source data 4. [file elife-70086-data4.csv]

sp	page	keyw	n	webID	timestamp.parse	year
Rhinella marina	4	Rhinella marina	2	terraristikTemporal	2010-09-20	2010
Rhinella schneideri	4	Rhinella schneideri	2	terraristikTemporal	2010-09-20	2010
Theloderma corticale	4	Theloderma corticale	1	terraristikTemporal	2010-09-20	2010
Phyllomedusa bicolor	7	Phyllomedusa bicolor	1	terraristikTemporal	2010-09-15	2010
Pelobatrachus nasuta	7	Megophrys nasuta	1	terraristikTemporal	2010-09-15	2010
Nyctixalus pictus	7	Nyctixalus pictus	1	terraristikTemporal	2010-09-15	2010
Theloderma asperum	7	Theloderma asperum	1	terraristikTemporal	2010-09-15	2010
Phyllomedusa bicolor	8	Phyllomedusa bicolor	1	terraristikTemporal	2010-09-17	2010
Pelobatrachus nasuta	8	Megophrys nasuta	1	terraristikTemporal	2010-09-17	2010
Nyctixalus pictus	8	Nyctixalus pictus	1	terraristikTemporal	2010-09-17	2010
Theloderma asperum	8	Theloderma asperum	1	terraristikTemporal	2010-09-17	2010
Rhinella marina	9	Rhinella marina	2	terraristikTemporal	2010-09-15	2010
Rhinella schneideri	9	Rhinella schneideri	2	terraristikTemporal	2010-09-15	2010
Rhinella marina	10	Rhinella marina	2	terraristikTemporal	2010-09-15	2010
Rhinella schneideri	10	Rhinella schneideri	2	terraristikTemporal	2010-09-15	2010
Dendrobates leucomelas	10	Dendrobates leucomelas	1	terraristikTemporal	2010-09-15	2010
Dendrobates auratus	12	Dendrobates auratus	1	terraristikTemporal	2010-09-15	2010
Dendrobates leucomelas	12	Dendrobates leucomelas	1	terraristikTemporal	2010-09-15	2010
Dendrobates tinctorius	12	Dendrobates tinctorius	1	terraristikTemporal	2010-09-15	2010
Oophaga pumilio	12	Oophaga pumilio	1	terraristikTemporal	2010-09-15	2010
Ranitomeya reticulata	12	Ranitomeya reticulata	1	terraristikTemporal	2010-09-15	2010
Melanophryniscus stelzneri	15	Melanophryniscus stelzneri	1	terraristikTemporal	2010-09-15	2010
Dendrobates auratus	15	Dendrobates auratus	1	terraristikTemporal	2010-09-15	2010
Dendrobates leucomelas	15	Dendrobates leucomelas	1	terraristikTemporal	2010-09-15	2010
Dendrobates tinctorius	15	Dendrobates tinctorius	2	terraristikTemporal	2010-09-15	2010
Triturus cristatus	15	Triturus cristatus	1	terraristikTemporal	2010-09-15	2010
Bombina bombina	16	Bombina bombina	1	terraristikTemporal	2010-09-15	2010
Bufotes viridis	16	Bufo viridis	1	terraristikTemporal	2010-09-15	2010
Pelophylax lessonae	16	Rana esculenta	1	terraristikTemporal	2010-09-15	2010
Pelophylax ridibundus	16	Rana esculenta	1	terraristikTemporal	2010-09-15	2010
Bombina bombina	17	Bombina bombina	1	terraristikTemporal	2010-09-15	2010
Bufotes viridis	17	Bufo viridis	1	terraristikTemporal	2010-09-15	2010
Melanophryniscus stelzneri	17	Melanophryniscus stelzneri	1	terraristikTemporal	2010-09-15	2010
Dendrobates auratus	17	Dendrobates auratus	1	terraristikTemporal	2010-09-15	2010
Dendrobates leucomelas	17	Dendrobates leucomelas	1	terraristikTemporal	2010-09-15	2010
Dendrobates tinctorius	17	Dendrobates tinctorius	2	terraristikTemporal	2010-09-15	2010
Hyla arborea	17	Hyla arborea	1	terraristikTemporal	2010-09-15	2010
Pelophylax lessonae	17	Rana esculenta	1	terraristikTemporal	2010-09-15	2010
Pelophylax ridibundus	17	Rana esculenta	1	terraristikTemporal	2010-09-15	2010
Calyptocephalella gayi	19	Caudiverbera caudiverbera	1	terraristikTemporal	2010-09-15	2010
Litoria infrafrenata	19	Litoria infrafrenata	1	terraristikTemporal	2010-09-15	2010
Ceratophrys cranwelli	20	Ceratophrys cranwelli	1	terraristikTemporal	2010-09-15	2010
Ceratophrys ornata	20	Ceratophrys ornata	1	terraristikTemporal	2010-09-15	2010
Phyllobates vittatus	20	Phyllobates vittatus	1	terraristikTemporal	2010-09-15	2010
Melanophryniscus stelzneri	21	Melanophryniscus stelzneri	1	terraristikTemporal	2010-09-15	2010
Lepidobatrachus laevis	21	Lepidobatrachus laevis	1	terraristikTemporal	2010-09-15	2010
Dendrobates truncatus	22	Dendrobates truncatus	1	terraristikTemporal	2010-09-20	2010
Ceratophrys aurita	23	Ceratophrys aurita	1	terraristikTemporal	2010-09-15	2010
Dendrobates tinctorius	23	Dendrobates tinctorius	1	terraristikTemporal	2010-09-15	2010
Dendrobates truncatus	23	Dendrobates truncatus	1	terraristikTemporal	2010-09-15	2010
Litoria caerulea	23	Litoria caerulea	1	terraristikTemporal	2010-09-15	2010
Epipedobates anthonyi	24	Epipedobates anthonyi	1	terraristikTemporal	2010-09-15	2010
Dendrobates tinctorius	24	Dendrobates tinctorius	1	terraristikTemporal	2010-09-15	2010
Triturus carnifex	24	Triturus carnifex	1	terraristikTemporal	2010-09-15	2010
Triturus marmoratus	24	Triturus marmoratus	1	terraristikTemporal	2010-09-15	2010
Caecilia thompsoni	24	Caecilia thompsoni	1	terraristikTemporal	2010-09-15	2010
Dermophis mexicanus	24	Dermophis mexicanus	1	terraristikTemporal	2010-09-15	2010
Ichthyophis glutinosus	24	Ichthyophis glutinosus	1	terraristikTemporal	2010-09-15	2010
Siphonops annulatus	24	Siphonops annulatus	1	terraristikTemporal	2010-09-15	2010
Typhlonectes compressicauda	24	Typhlonectes compressicauda	1	terraristikTemporal	2010-09-15	2010
Melanophryniscus stelzneri	25	Melanophryniscus stelzneri	1	terraristikTemporal	2010-09-15	2010
Dendrobates tinctorius	25	Dendrobates tinctorius	1	terraristikTemporal	2010-09-15	2010
Oophaga pumilio	25	Oophaga pumilio	1	terraristikTemporal	2010-09-15	2010
Phyllobates vittatus	25	Phyllobates vittatus	1	terraristikTemporal	2010-09-15	2010
Oophaga pumilio	28	Oophaga pumilio	1	terraristikTemporal	2010-09-15	2010
Phyllobates vittatus	28	Phyllobates vittatus	1	terraristikTemporal	2010-09-15	2010
Melanophryniscus stelzneri	31	Melanophryniscus stelzneri	1	terraristikTemporal	2010-09-20	2010
Phyllomedusa bicolor	32	Phyllomedusa bicolor	1	terraristikTemporal	2010-09-15	2010
Pelobatrachus nasuta	32	Megophrys nasuta	1	terraristikTemporal	2010-09-15	2010
Polypedates colletti	32	Polypedates colletti	1	terraristikTemporal	2010-09-15	2010
Melanophryniscus stelzneri	33	Melanophryniscus stelzneri	1	terraristikTemporal	2010-12-20	2010
Rhinella schneideri	33	Bufo paracnemis	1	terraristikTemporal	2010-12-20	2010
Lepidobatrachus laevis	33	Lepidobatrachus laevis	1	terraristikTemporal	2010-12-20	2010
Occidozyga lima	33	Occidozyga lima	1	terraristikTemporal	2010-12-20	2010
Phyllomedusa sauvagii	33	Phyllomedusa sauvagii	1	terraristikTemporal	2010-12-20	2010
Phlyctimantis maculatus	33	Kassina maculata	1	terraristikTemporal	2010-12-20	2010
Pelobatrachus nasuta	33	Megophrys nasuta	1	terraristikTemporal	2010-12-20	2010
Phrynomantis bifasciatus	33	Phrynomantis bifasciatus	1	terraristikTemporal	2010-12-20	2010
Anaxyrus speciosus	34	Bufo speciosus	1	terraristikTemporal	2010-12-20	2010
Lepidobatrachus laevis	34	Lepidobatrachus laevis	1	terraristikTemporal	2010-12-20	2010
Leptodactylus pentadactylus	34	Leptodactylus pentadactylus	1	terraristikTemporal	2010-12-20	2010
Rhinella margaritifera	36	Bufo margaritifer	1	terraristikTemporal	2010-12-20	2010
Hoplobatrachus tigerinus	36	Bufo typhonius	1	terraristikTemporal	2010-12-20	2010
Rentapia hosii	37	Pedostibes hosii	1	terraristikTemporal	2010-12-20	2010
Trachycephalus resinifictrix	37	Phrynohyas resinifictrix	1	terraristikTemporal	2010-12-20	2010
Agalychnis callidryas	37	Agalychnis callidryas	1	terraristikTemporal	2010-12-20	2010
Mantella aurantiaca	37	Mantella aurantiaca	1	terraristikTemporal	2010-12-20	2010
Theloderma gordoni	37	Theloderma gordoni	1	terraristikTemporal	2010-12-20	2010
Ranitomeya variabilis	40	Ranitomeya variabilis	1	terraristikTemporal	2010-12-20	2010
Ceratophrys cranwelli	41	Ceratophrys cranwelli	1	terraristikTemporal	2010-12-20	2010
Anaxyrus speciosus	42	Bufo speciosus	1	terraristikTemporal	2010-12-20	2010
Rhinella schneideri	42	Bufo paracnemis	1	terraristikTemporal	2010-12-20	2010
Lepidobatrachus laevis	42	Lepidobatrachus laevis	1	terraristikTemporal	2010-12-20	2010
Leptodactylus pentadactylus	42	Leptodactylus pentadactylus	1	terraristikTemporal	2010-12-20	2010
Dendrobates tinctorius	43	Dendrobates tinctorius	1	terraristikTemporal	2010-12-20	2010
Melanophryniscus stelzneri	45	Melanophryniscus stelzneri	1	terraristikTemporal	2010-12-20	2010
Ceratophrys stolzmanni	45	Ceratophrys stolzmanni	1	terraristikTemporal	2010-12-20	2010
Trachycephalus resinifictrix	45	Trachycephalus resinifictrix	1	terraristikTemporal	2010-12-20	2010
Ambystoma maculatum	45	Ambystoma maculatum	1	terraristikTemporal	2010-12-20	2010
Salamandra algira	45	Salamandra algira	1	terraristikTemporal	2010-12-20	2010
Ceratophrys cranwelli	47	Ceratophrys cranwelli	1	terraristikTemporal	2010-12-20	2010
Ceratophrys stolzmanni	47	Ceratophrys stolzmanni	1	terraristikTemporal	2010-12-20	2010
Salamandra salamandra	47	Salamandra salamandra	1	terraristikTemporal	2010-12-20	2010
Epipedobates anthonyi	48	Epipedobates anthonyi	1	terraristikTemporal	2010-12-20	2010
Oophaga pumilio	48	Oophaga pumilio	1	terraristikTemporal	2010-12-20	2010
Oophaga sylvatica	48	Oophaga sylvatica	1	terraristikTemporal	2010-12-20	2010
Dendrobates tinctorius	49	Dendrobates azureus	1	terraristikTemporal	2010-12-20	2010
Heterixalus rutenbergi	49	Heterixalus rutenbergi	1	terraristikTemporal	2010-12-20	2010
Hyperolius riggenbachi	51	Hyperolius riggenbachi	1	terraristikTemporal	2010-12-20	2010
Aneides flavipunctatus	53	Aneides flavipunctatus	1	terraristikTemporal	2010-12-20	2010
Bombina bombina	54	Bombina bombina	1	terraristikTemporal	2010-12-20	2010
Bombina variegata	54	Bombina variegata	1	terraristikTemporal	2010-12-20	2010
Barbarophryne brongersmai	54	Bufo brongersmai	1	terraristikTemporal	2010-12-20	2010
Bufotes viridis	54	Bufo viridis	1	terraristikTemporal	2010-12-20	2010
Epidalea calamita	54	Bufo calamita	1	terraristikTemporal	2010-12-20	2010
Pelobates fuscus	54	Pelobates fuscus	1	terraristikTemporal	2010-12-20	2010
Ambystoma opacum	54	Ambystoma opacum	1	terraristikTemporal	2010-12-20	2010
Ambystoma tigrinum	54	Ambystoma tigrinum	1	terraristikTemporal	2010-12-20	2010
Triturus carnifex	54	Triturus carnifex	1	terraristikTemporal	2010-12-20	2010
Tylototriton verrucosus	54	Tylototriton verrucosus	1	terraristikTemporal	2010-12-20	2010
Dendrobates tinctorius	59	Dendrobates tinctorius	1	terraristikTemporal	2010-12-20	2010
Phyllomedusa hypochondrialis	59	Phyllomedusa hypochondrialis	1	terraristikTemporal	2010-12-20	2010
Rhacophorus reinwardtii	61	Rhacophorus reinwardtii	1	terraristikTemporal	2010-12-20	2010
Rhinella granulosa	62	Bufo granulosus	1	terraristikTemporal	2010-12-20	2010
Rhinella pygmaea	62	Bufo pygmaeus	1	terraristikTemporal	2010-12-20	2010
Rhinella schneideri	62	Bufo paracnemis	1	terraristikTemporal	2010-12-20	2010
Ceratophrys cranwelli	62	Ceratophrys cranwelli	1	terraristikTemporal	2010-12-20	2010
Oophaga pumilio	62	Oophaga pumilio	1	terraristikTemporal	2010-12-20	2010
Phyllomedusa azurea	62	Phyllomedusa azurea	1	terraristikTemporal	2010-12-20	2010
Dermatonotus muelleri	62	Dermatonotus muelleri	1	terraristikTemporal	2010-12-20	2010
Phyllobates terribilis	63	Phyllobates terribilis	1	terraristikTemporal	2008-03-16	2008
Cynops ensicauda	63	Cynops ensicauda	1	terraristikTemporal	2008-03-16	2008
Ommatotriton vittatus	63	Ommatotriton vittatus	1	terraristikTemporal	2008-03-16	2008
Paramesotriton labiatus	63	Pachytriton labiatus	1	terraristikTemporal	2008-03-16	2008
Pleurodeles waltl	63	Pleurodeles waltl	1	terraristikTemporal	2008-03-16	2008
Triturus carnifex	63	Triturus carnifex	1	terraristikTemporal	2008-03-16	2008
Pelobatrachus nasuta	64	Megophrys nasuta	1	terraristikTemporal	2008-05-26	2008
Dendrobates auratus	65	Dendrobates auratus	1	terraristikTemporal	2009-02-12	2009
Pelobatrachus nasuta	69	Megophrys nasuta	1	terraristikTemporal	2008-03-16	2008
Neurergus kaiseri	69	Neurergus kaiseri	1	terraristikTemporal	2008-03-16	2008
Tylototriton verrucosus	69	Tylototriton verrucosus	1	terraristikTemporal	2008-03-16	2008
Dendrobates leucomelas	72	Dendrobates leucomelas	1	terraristikTemporal	2008-03-16	2008
Dendrobates tinctorius	72	Dendrobates tinctorius	1	terraristikTemporal	2008-03-16	2008
Pelobatrachus nasuta	73	Megophrys nasuta	1	terraristikTemporal	2008-05-26	2008
Dendrobates auratus	76	Dendrobates auratus	1	terraristikTemporal	2008-05-26	2008
Oophaga pumilio	76	Dendrobates pumilio	1	terraristikTemporal	2008-05-26	2008
Cynops orientalis	77	Cynops orientalis	1	terraristikTemporal	2009-02-12	2009
Dendrobates tinctorius	78	Dendrobates tinctorius	1	terraristikTemporal	2008-03-16	2008
Bombina orientalis	79	Bombina orientalis	1	terraristikTemporal	2008-03-16	2008
Dendrobates tinctorius	79	Dendrobates tinctorius	1	terraristikTemporal	2008-03-16	2008
Mantella aurantiaca	82	Mantella aurantiaca	1	terraristikTemporal	2009-02-12	2009
Mantella laevigata	82	Mantella laevigata	1	terraristikTemporal	2009-02-12	2009
Mantella aurantiaca	83	Mantella aurantiaca	1	terraristikTemporal	2009-02-12	2009
Mantella laevigata	83	Mantella laevigata	1	terraristikTemporal	2009-02-12	2009
Dendrobates tinctorius	85	Dendrobates tinctorius	1	terraristikTemporal	2008-03-16	2008
Bombina orientalis	87	Bombina orientalis	1	terraristikTemporal	2009-02-12	2009
Epipedobates anthonyi	87	Epipedobates anthonyi	1	terraristikTemporal	2009-02-12	2009
Mantella aurantiaca	88	Mantella aurantiaca	1	terraristikTemporal	2008-03-16	2008
Bombina orientalis	89	Bombina orientalis	1	terraristikTemporal	2008-05-26	2008
Ambystoma tigrinum	89	Ambystoma tigrinum	1	terraristikTemporal	2008-05-26	2008
Cynops orientalis	89	Cynops orientalis	1	terraristikTemporal	2008-05-26	2008
Pelobatrachus nasuta	90	Megophrys nasuta	1	terraristikTemporal	2009-02-12	2009
Neurergus kaiseri	92	Neurergus kaiseri	1	terraristikTemporal	2008-05-26	2008
Neurergus strauchii	92	Neurergus strauchii	1	terraristikTemporal	2008-05-26	2008
Trachycephalus resinifictrix	93	Phrynohyas resinifictrix	1	terraristikTemporal	2008-03-16	2008
Rhacophorus reinwardtii	93	Rhacophorus reinwardtii	1	terraristikTemporal	2008-03-16	2008
Ceratophrys ornata	97	Ceratophrys ornata	1	terraristikTemporal	2009-02-12	2009
Phyllobates vittatus	99	Phyllobates vittatus	1	terraristikTemporal	2008-05-26	2008
Dendrobates tinctorius	101	Dendrobates tinctorius	1	terraristikTemporal	2008-05-26	2008
Bombina variegata	102	Bombina variegata	1	terraristikTemporal	2008-03-16	2008
Salamandra salamandra	102	Salamandra salamandra	1	terraristikTemporal	2008-03-16	2008
Ambystoma mavortium	107	Ambystoma mavortium	1	terraristikTemporal	2009-02-12	2009
Ambystoma opacum	107	Ambystoma opacum	1	terraristikTemporal	2009-02-12	2009
Desmognathus fuscus	107	Desmognathus fuscus	1	terraristikTemporal	2009-02-12	2009
Desmognathus quadramaculatus	107	Desmognathus quadramaculatus	1	terraristikTemporal	2009-02-12	2009
Plethodon glutinosus	107	Plethodon glutinosus	1	terraristikTemporal	2009-02-12	2009
Cynops cyanurus	107	Cynops cyanurus	1	terraristikTemporal	2009-02-12	2009
Paramesotriton chinensis	107	Paramesotriton chinensis	1	terraristikTemporal	2009-02-12	2009
Triturus marmoratus	107	Triturus marmoratus	1	terraristikTemporal	2009-02-12	2009
Salamandra salamandra	107	Salamandra salamandra	1	terraristikTemporal	2009-02-12	2009
Dendrobates tinctorius	108	Dendrobates tinctorius	1	terraristikTemporal	2008-03-16	2008
Oophaga pumilio	108	Dendrobates pumilio	1	terraristikTemporal	2008-03-16	2008
Phyllobates terribilis	108	Phyllobates terribilis	1	terraristikTemporal	2008-03-16	2008
Phyllobates lugubris	112	Phyllobates lugubris	1	terraristikTemporal	2008-03-16	2008
Trachycephalus resinifictrix	112	Phrynohyas resinifictrix	1	terraristikTemporal	2008-03-16	2008
Rhaebo blombergi	115	Bufo blombergi	1	terraristikTemporal	2008-05-26	2008
Tylototriton verrucosus	115	Tylototriton verrucosus	1	terraristikTemporal	2008-05-26	2008
Excidobates mysteriosus	117	Dendrobates mysteriosus	1	terraristikTemporal	2008-03-16	2008
Ceratophrys ornata	120	Ceratophrys ornata	1	terraristikTemporal	2008-03-16	2008
Triturus marmoratus	120	Triturus marmoratus	1	terraristikTemporal	2008-03-16	2008
Rhinella schneideri	122	Bufo paracnemis	1	terraristikTemporal	2009-02-09	2009
Ranitomeya ventrimaculata	124	Ranitomeya ventrimaculata	1	terraristikTemporal	2008-03-16	2008
Dendrobates auratus	125	Dendrobates auratus	1	terraristikTemporal	2008-05-26	2008
Bombina variegata	128	Bombina variegata	1	terraristikTemporal	2009-02-12	2009
Incilius alvarius	128	Bufo alvarius	1	terraristikTemporal	2009-02-12	2009
Hyla arborea	128	Hyla arborea	1	terraristikTemporal	2009-02-12	2009
Ambystoma andersoni	128	Ambystoma andersoni	1	terraristikTemporal	2009-02-12	2009
Triturus marmoratus	128	Triturus marmoratus	1	terraristikTemporal	2009-02-12	2009
Dendropsophus leucophyllatus	131	Hyla leucophyllata	1	terraristikTemporal	2008-03-16	2008
Dendropsophus marmoratus	131	Hyla marmorata	1	terraristikTemporal	2008-03-16	2008
Phyllomedusa bicolor	131	Phyllomedusa bicolor	1	terraristikTemporal	2008-03-16	2008
Phyllomedusa hypochondrialis	131	Phyllomedusa hypochondrialis	1	terraristikTemporal	2008-03-16	2008
Ambystoma macrodactylum	131	Ambystoma macrodactylum	1	terraristikTemporal	2008-03-16	2008
Ambystoma maculatum	131	Ambystoma maculatum	1	terraristikTemporal	2008-03-16	2008
Neurergus kaiseri	131	Neurergus kaiseri	1	terraristikTemporal	2008-03-16	2008
Paramesotriton labiatus	131	Paramesotriton labiatus	1	terraristikTemporal	2008-03-16	2008
Tylototriton shanjing	131	Tylototriton shanjing	1	terraristikTemporal	2008-03-16	2008
Salamandra algira	131	Salamandra algira	1	terraristikTemporal	2008-03-16	2008
Phyllobates vittatus	132	Phyllobates vittatus	1	terraristikTemporal	2008-05-26	2008
Oophaga pumilio	133	Dendrobates pumilio	1	terraristikTemporal	2009-02-12	2009
Ommatotriton vittatus	134	Triturus vittatus	1	terraristikTemporal	2008-03-16	2008
Triturus dobrogicus	134	Triturus dobrogicus	1	terraristikTemporal	2008-03-16	2008
Epipedobates tricolor	138	Epipedobates tricolor	1	terraristikTemporal	2008-03-16	2008
Dendrobates tinctorius	138	Dendrobates tinctorius	2	terraristikTemporal	2008-03-16	2008
Mantella baroni	138	Mantella baroni	1	terraristikTemporal	2008-03-16	2008
Mantella haraldmeieri	138	Mantella haraldmeieri	1	terraristikTemporal	2008-03-16	2008
Mantella pulchra	138	Mantella pulchra	1	terraristikTemporal	2008-03-16	2008
Dendrobates tinctorius	141	Dendrobates tinctorius	2	terraristikTemporal	2008-03-16	2008
Ambystoma maculatum	141	Ambystoma maculatum	1	terraristikTemporal	2008-03-16	2008
Neurergus kaiseri	141	Neurergus kaiseri	1	terraristikTemporal	2008-03-16	2008
Paramesotriton deloustali	141	Paramesotriton deloustali	1	terraristikTemporal	2008-03-16	2008
Salamandrina terdigitata	141	Salamandrina terdigitata	1	terraristikTemporal	2008-03-16	2008
Neurergus kaiseri	142	Neurergus kaiseri	1	terraristikTemporal	2008-05-26	2008
Theloderma corticale	143	Theloderma corticale	1	terraristikTemporal	2009-02-12	2009
Epipedobates anthonyi	144	Epipedobates anthonyi	1	terraristikTemporal	2010-08-25	2010
Oophaga pumilio	144	Dendrobates pumilio	1	terraristikTemporal	2010-08-25	2010
Chioglossa lusitanica	144	Chioglossa lusitanica	1	terraristikTemporal	2010-08-25	2010
Atelopus spumarius	145	Atelopus spumarius	1	terraristikTemporal	2010-08-24	2010
Melanophryniscus stelzneri	145	Melanophryniscus stelzneri	1	terraristikTemporal	2010-08-24	2010
Rhinella schneideri	145	Bufo paracnemis	1	terraristikTemporal	2010-08-24	2010
Occidozyga lima	145	Occidozyga lima	1	terraristikTemporal	2010-08-24	2010
Phyllomedusa bicolor	145	Phyllomedusa bicolor	1	terraristikTemporal	2010-08-24	2010
Pelobatrachus nasuta	145	Megophrys nasuta	1	terraristikTemporal	2010-08-24	2010
Dendrobates tinctorius	146	Dendrobates tinctorius	1	terraristikTemporal	2010-08-24	2010
Dendrobates auratus	147	Dendrobates auratus	1	terraristikTemporal	2010-08-24	2010
Dendrobates tinctorius	147	Dendrobates tinctorius	1	terraristikTemporal	2010-08-24	2010
Chioglossa lusitanica	148	Chioglossa lusitanica	1	terraristikTemporal	2010-08-24	2010
Chioglossa lusitanica	149	Chioglossa lusitanica	1	terraristikTemporal	2010-08-24	2010
Mantella aurantiaca	151	Mantella aurantiaca	1	terraristikTemporal	2010-08-24	2010
Bombina variegata	153	Bombina variegata	1	terraristikTemporal	2010-08-24	2010
Ranitomeya benedicta	153	Ranitomeya benedicta	1	terraristikTemporal	2010-08-24	2010
Hyla arborea	153	Hyla arborea	1	terraristikTemporal	2010-08-24	2010
Ambystoma opacum	153	Ambystoma opacum	1	terraristikTemporal	2010-08-24	2010
Siren intermedia	153	Siren intermedia	1	terraristikTemporal	2010-08-24	2010
Siren lacertina	153	Siren lacertina	1	terraristikTemporal	2010-08-24	2010
Bombina orientalis	154	Bombina orientalis	1	terraristikTemporal	2010-08-24	2010
Dyscophus guineti	154	Dyscophus guineti	1	terraristikTemporal	2010-08-24	2010
Dyscophus guineti	156	Dyscophus guineti	1	terraristikTemporal	2010-08-24	2010
Dyscophus guineti	157	Dyscophus guineti	1	terraristikTemporal	2010-08-24	2010
Phyllobates vittatus	158	Phyllobates vittatus	1	terraristikTemporal	2010-08-24	2010
Ceratophrys cranwelli	159	Ceratophrys cranwelli	1	terraristikTemporal	2010-08-25	2010
Ceratophrys ornata	159	Ceratophrys ornata	1	terraristikTemporal	2010-08-25	2010
Mantella aurantiaca	159	Mantella aurantiaca	1	terraristikTemporal	2010-08-25	2010
Mantella betsileo	159	Mantella betsileo	1	terraristikTemporal	2010-08-25	2010
Mantella pulchra	159	Mantella pulchra	1	terraristikTemporal	2010-08-25	2010
Mantella viridis	159	Mantella viridis	1	terraristikTemporal	2010-08-25	2010
Potamotyphlus kaupii	160	Potamotyphlus kaupii	1	terraristikTemporal	2010-08-24	2010
Phyllobates vittatus	162	Phyllobates vittatus	1	terraristikTemporal	2010-08-25	2010
Phyllobates vittatus	163	Phyllobates vittatus	1	terraristikTemporal	2010-08-25	2010
Bombina orientalis	166	Bombina orientalis	1	terraristikTemporal	2010-08-24	2010
Dendrobates auratus	166	Dendrobates auratus	1	terraristikTemporal	2010-08-24	2010
Ambystoma mexicanum	167	Ambystoma mexicanum	1	terraristikTemporal	2010-08-25	2010
Ceratophrys aurita	172	Ceratophrys aurita	1	terraristikTemporal	2010-08-24	2010
Litoria caerulea	172	Litoria caerulea	1	terraristikTemporal	2010-08-24	2010
Dendrobates tinctorius	185	Dendrobates tinctorius	1	terraristikTemporal	2010-06-26	2010
Melanophryniscus stelzneri	186	Melanophryniscus stelzneri	1	terraristikTemporal	2010-12-20	2010
Rhinella schneideri	186	Bufo paracnemis	1	terraristikTemporal	2010-12-20	2010
Lepidobatrachus laevis	186	Lepidobatrachus laevis	1	terraristikTemporal	2010-12-20	2010
Occidozyga lima	186	Occidozyga lima	1	terraristikTemporal	2010-12-20	2010
Phyllomedusa sauvagii	186	Phyllomedusa sauvagii	1	terraristikTemporal	2010-12-20	2010
Phlyctimantis maculatus	186	Kassina maculata	1	terraristikTemporal	2010-12-20	2010
Pelobatrachus nasuta	186	Megophrys nasuta	1	terraristikTemporal	2010-12-20	2010
Phrynomantis bifasciatus	186	Phrynomantis bifasciatus	1	terraristikTemporal	2010-12-20	2010
Ranitomeya reticulata	187	Ranitomeya reticulata	1	terraristikTemporal	2010-06-26	2010
Anaxyrus speciosus	188	Bufo speciosus	1	terraristikTemporal	2010-12-20	2010
Lepidobatrachus laevis	188	Lepidobatrachus laevis	1	terraristikTemporal	2010-12-20	2010
Leptodactylus pentadactylus	188	Leptodactylus pentadactylus	1	terraristikTemporal	2010-12-20	2010
Leptopelis vermiculatus	189	Leptopelis vermiculatus	1	terraristikTemporal	2010-06-26	2010
Nyctixalus pictus	189	Nyctixalus pictus	1	terraristikTemporal	2010-06-26	2010
Rhacophorus nigropalmatus	189	Rhacophorus nigropalmatus	1	terraristikTemporal	2010-06-26	2010
Theloderma asperum	189	Theloderma asperum	1	terraristikTemporal	2010-06-26	2010
Theloderma horridum	189	Theloderma horridum	1	terraristikTemporal	2010-06-26	2010
Leptopelis christyi	191	Leptopelis christyi	1	terraristikTemporal	2010-06-26	2010
Leptopelis uluguruensis	191	Leptopelis uluguruensis	1	terraristikTemporal	2010-06-26	2010
Leptopelis vermiculatus	191	Leptopelis vermiculatus	1	terraristikTemporal	2010-06-26	2010
Melanophryniscus stelzneri	191	Melanophryniscus stelzneri	1	terraristikTemporal	2010-06-26	2010
Rentapia hosii	191	Pedostibes hosii	1	terraristikTemporal	2010-06-26	2010
Epipedobates tricolor	191	Epipedobates tricolor	1	terraristikTemporal	2010-06-26	2010
Dendrobates auratus	191	Dendrobates auratus	1	terraristikTemporal	2010-06-26	2010
Dendrobates leucomelas	191	Dendrobates leucomelas	1	terraristikTemporal	2010-06-26	2010
Agalychnis callidryas	191	Agalychnis callidryas	1	terraristikTemporal	2010-06-26	2010
Afrixalus fornasini	191	Afrixalus fornasini	1	terraristikTemporal	2010-06-26	2010
Hyperolius argus	191	Hyperolius argus	1	terraristikTemporal	2010-06-26	2010
Hyperolius mitchelli	191	Hyperolius mitchelli	1	terraristikTemporal	2010-06-26	2010
Hyperolius puncticulatus	191	Hyperolius puncticulatus	1	terraristikTemporal	2010-06-26	2010
Kassina cochranae	191	Kassina cochranae	1	terraristikTemporal	2010-06-26	2010
Kassina senegalensis	191	Kassina senegalensis	1	terraristikTemporal	2010-06-26	2010
Nyctixalus pictus	191	Nyctixalus pictus	1	terraristikTemporal	2010-06-26	2010
Ichthyosaura alpestris	191	Triturus alpestris	1	terraristikTemporal	2010-06-26	2010
Lissotriton vulgaris	191	Triturus vulgaris	1	terraristikTemporal	2010-06-26	2010
Herpele squalostoma	191	Herpele squalostoma	1	terraristikTemporal	2010-06-26	2010
Rhinella margaritifera	192	Bufo margaritifer	1	terraristikTemporal	2010-12-20	2010
Hoplobatrachus tigerinus	192	Bufo typhonius	1	terraristikTemporal	2010-12-20	2010
Ceratophrys cranwelli	193	Ceratophrys cranwelli	1	terraristikTemporal	2010-06-26	2010
Ceratophrys ornata	193	Ceratophrys ornata	1	terraristikTemporal	2010-06-26	2010
Rentapia hosii	194	Pedostibes hosii	1	terraristikTemporal	2010-12-20	2010
Trachycephalus resinifictrix	194	Phrynohyas resinifictrix	1	terraristikTemporal	2010-12-20	2010
Agalychnis callidryas	194	Agalychnis callidryas	1	terraristikTemporal	2010-12-20	2010
Mantella aurantiaca	194	Mantella aurantiaca	1	terraristikTemporal	2010-12-20	2010
Theloderma gordoni	194	Theloderma gordoni	1	terraristikTemporal	2010-12-20	2010
Oophaga pumilio	195	Oophaga pumilio	1	terraristikTemporal	2010-06-26	2010
Oophaga pumilio	196	Oophaga pumilio	1	terraristikTemporal	2010-06-26	2010
Ranitomeya variabilis	200	Ranitomeya variabilis	1	terraristikTemporal	2010-12-20	2010
Barbarophryne brongersmai	201	Bufo brongersmai	1	terraristikTemporal	2010-06-26	2010
Bufotes viridis	201	Bufo viridis	1	terraristikTemporal	2010-06-26	2010
Epidalea calamita	201	Bufo calamita	1	terraristikTemporal	2010-06-26	2010
Ichthyosaura alpestris	201	Triturus alpestris	1	terraristikTemporal	2010-06-26	2010
Triturus carnifex	201	Triturus carnifex	1	terraristikTemporal	2010-06-26	2010
Triturus cristatus	201	Triturus cristatus	1	terraristikTemporal	2010-06-26	2010
Ceratophrys cranwelli	202	Ceratophrys cranwelli	1	terraristikTemporal	2010-12-20	2010
Pelobatrachus nasuta	203	Megophrys nasuta	1	terraristikTemporal	2010-06-26	2010
Cynops cyanurus	203	Cynops cyanurus	1	terraristikTemporal	2010-06-26	2010
Anaxyrus speciosus	204	Bufo speciosus	1	terraristikTemporal	2010-12-20	2010
Rhinella schneideri	204	Bufo paracnemis	1	terraristikTemporal	2010-12-20	2010
Lepidobatrachus laevis	204	Lepidobatrachus laevis	1	terraristikTemporal	2010-12-20	2010
Leptodactylus pentadactylus	204	Leptodactylus pentadactylus	1	terraristikTemporal	2010-12-20	2010
Bombina orientalis	205	Bombina orientalis	1	terraristikTemporal	2010-06-26	2010
Pelobatrachus nasuta	205	Megophrys nasuta	1	terraristikTemporal	2010-06-26	2010
Dendrobates tinctorius	206	Dendrobates tinctorius	1	terraristikTemporal	2010-12-20	2010
Ambystoma maculatum	207	Ambystoma maculatum	1	terraristikTemporal	2010-06-26	2010
Trachycephalus resinifictrix	208	Trachycephalus resinifictrix	1	terraristikTemporal	2010-12-20	2010
Ranitomeya vanzolinii	209	Ranitomeya vanzolinii	1	terraristikTemporal	2010-06-26	2010
Boana punctata	209	Hyla punctata	1	terraristikTemporal	2010-06-26	2010
Melanophryniscus stelzneri	210	Melanophryniscus stelzneri	1	terraristikTemporal	2010-12-20	2010
Ceratophrys stolzmanni	210	Ceratophrys stolzmanni	1	terraristikTemporal	2010-12-20	2010
Ambystoma maculatum	210	Ambystoma maculatum	1	terraristikTemporal	2010-12-20	2010
Salamandra algira	210	Salamandra algira	1	terraristikTemporal	2010-12-20	2010
Phyllobates vittatus	211	Phyllobates vittatus	1	terraristikTemporal	2010-06-26	2010
Phyllobates vittatus	213	Phyllobates vittatus	1	terraristikTemporal	2010-06-26	2010
Ceratophrys cranwelli	214	Ceratophrys cranwelli	1	terraristikTemporal	2010-12-20	2010
Ceratophrys stolzmanni	214	Ceratophrys stolzmanni	1	terraristikTemporal	2010-12-20	2010
Salamandra salamandra	214	Salamandra salamandra	1	terraristikTemporal	2010-12-20	2010
Phyllobates vittatus	215	Phyllobates vittatus	1	terraristikTemporal	2010-06-26	2010
Pipa parva	215	Pipa parva	1	terraristikTemporal	2010-06-26	2010
Epipedobates anthonyi	216	Epipedobates anthonyi	1	terraristikTemporal	2010-12-20	2010
Oophaga pumilio	216	Oophaga pumilio	1	terraristikTemporal	2010-12-20	2010
Oophaga sylvatica	216	Oophaga sylvatica	1	terraristikTemporal	2010-12-20	2010
Dendrobates tinctorius	218	Dendrobates azureus	1	terraristikTemporal	2010-12-20	2010
Heterixalus rutenbergi	218	Heterixalus rutenbergi	1	terraristikTemporal	2010-12-20	2010
Ambystoma mexicanum	219	Ambystoma mexicanum	1	terraristikTemporal	2010-06-26	2010
Bombina bombina	221	Bombina bombina	1	terraristikTemporal	2010-06-26	2010
Bufotes viridis	221	Bufo viridis	1	terraristikTemporal	2010-06-26	2010
Dendrobates auratus	221	Dendrobates auratus	1	terraristikTemporal	2010-06-26	2010
Dendrobates leucomelas	221	Dendrobates leucomelas	1	terraristikTemporal	2010-06-26	2010
Dendrobates tinctorius	221	Dendrobates azureus	1	terraristikTemporal	2010-06-26	2010
Oophaga pumilio	221	Oophaga pumilio	1	terraristikTemporal	2010-06-26	2010
Pelophylax lessonae	221	Rana esculenta	1	terraristikTemporal	2010-06-26	2010
Pelophylax ridibundus	221	Rana esculenta	1	terraristikTemporal	2010-06-26	2010
Hyperolius riggenbachi	222	Hyperolius riggenbachi	1	terraristikTemporal	2010-12-20	2010
Aneides flavipunctatus	226	Aneides flavipunctatus	1	terraristikTemporal	2010-12-20	2010
Bombina bombina	228	Bombina bombina	1	terraristikTemporal	2010-12-20	2010
Bombina variegata	228	Bombina variegata	1	terraristikTemporal	2010-12-20	2010
Barbarophryne brongersmai	228	Bufo brongersmai	1	terraristikTemporal	2010-12-20	2010
Bufotes viridis	228	Bufo viridis	1	terraristikTemporal	2010-12-20	2010
Epidalea calamita	228	Bufo calamita	1	terraristikTemporal	2010-12-20	2010
Pelobates fuscus	228	Pelobates fuscus	1	terraristikTemporal	2010-12-20	2010
Ambystoma opacum	228	Ambystoma opacum	1	terraristikTemporal	2010-12-20	2010
Ambystoma tigrinum	228	Ambystoma tigrinum	1	terraristikTemporal	2010-12-20	2010
Triturus carnifex	228	Triturus carnifex	1	terraristikTemporal	2010-12-20	2010
Tylototriton verrucosus	228	Tylototriton verrucosus	1	terraristikTemporal	2010-12-20	2010
Bombina orientalis	231	Bombina orientalis	1	terraristikTemporal	2010-06-26	2010
Triturus carnifex	231	Triturus carnifex	1	terraristikTemporal	2010-06-26	2010
Triturus cristatus	231	Triturus cristatus	1	terraristikTemporal	2010-06-26	2010
Dendrobates tinctorius	235	Dendrobates tinctorius	1	terraristikTemporal	2010-06-26	2010
Oophaga pumilio	235	Oophaga pumilio	1	terraristikTemporal	2010-06-26	2010
Ranitomeya amazonica	235	Ranitomeya amazonica	1	terraristikTemporal	2010-06-26	2010
Dendrobates tinctorius	238	Dendrobates tinctorius	1	terraristikTemporal	2010-12-20	2010
Phyllomedusa hypochondrialis	238	Phyllomedusa hypochondrialis	1	terraristikTemporal	2010-12-20	2010
Rhacophorus reinwardtii	242	Rhacophorus reinwardtii	1	terraristikTemporal	2010-12-20	2010
Dendrobates tinctorius	243	Dendrobates tinctorius	1	terraristikTemporal	2010-06-26	2010
Rhinella granulosa	244	Bufo granulosus	1	terraristikTemporal	2010-12-20	2010
Rhinella pygmaea	244	Bufo pygmaeus	1	terraristikTemporal	2010-12-20	2010
Rhinella schneideri	244	Bufo paracnemis	1	terraristikTemporal	2010-12-20	2010
Ceratophrys cranwelli	244	Ceratophrys cranwelli	1	terraristikTemporal	2010-12-20	2010
Oophaga pumilio	244	Oophaga pumilio	1	terraristikTemporal	2010-12-20	2010
Phyllomedusa azurea	244	Phyllomedusa azurea	1	terraristikTemporal	2010-12-20	2010
Dermatonotus muelleri	244	Dermatonotus muelleri	1	terraristikTemporal	2010-12-20	2010
Calyptocephalella gayi	245	Caudiverbera caudiverbera	1	terraristikTemporal	2010-08-31	2010
Epipedobates anthonyi	245	Epipedobates anthonyi	1	terraristikTemporal	2010-08-31	2010
Litoria infrafrenata	245	Litoria infrafrenata	1	terraristikTemporal	2010-08-31	2010
Dendrobates tinctorius	246	Dendrobates tinctorius	1	terraristikTemporal	2010-08-31	2010
Dendrobates tinctorius	247	Dendrobates tinctorius	1	terraristikTemporal	2010-08-31	2010
Ceratophrys aurita	248	Ceratophrys aurita	1	terraristikTemporal	2010-08-31	2010
Litoria caerulea	248	Litoria caerulea	1	terraristikTemporal	2010-08-31	2010
Ceratophrys aurita	249	Ceratophrys aurita	1	terraristikTemporal	2010-08-31	2010
Litoria caerulea	249	Litoria caerulea	1	terraristikTemporal	2010-08-31	2010
Anaxyrus quercicus	252	Bufo quercicus	1	terraristikTemporal	2010-08-31	2010
Melanophryniscus stelzneri	252	Melanophryniscus stelzneri	1	terraristikTemporal	2010-08-31	2010
Pyxicephalus adspersus	252	Pyxicephalus adspersus	1	terraristikTemporal	2010-08-31	2010
Rana grylio	252	Rana grylio	1	terraristikTemporal	2010-08-31	2010
Amphiuma means	252	Amphiuma means	1	terraristikTemporal	2010-08-31	2010
Pseudotriton ruber	252	Pseudotriton ruber	1	terraristikTemporal	2010-08-31	2010
Necturus beyeri	252	Necturus beyeri	1	terraristikTemporal	2010-08-31	2010
Pseudobranchus striatus	252	Pseudobranchus striatus	1	terraristikTemporal	2010-08-31	2010
Siren intermedia	252	Siren intermedia	1	terraristikTemporal	2010-08-31	2010
Siren lacertina	252	Siren lacertina	1	terraristikTemporal	2010-08-31	2010
Hyla arborea	254	Hyla arborea	1	terraristikTemporal	2010-08-31	2010
Adelphobates galactonotus	255	Dendrobates galactonotus	1	terraristikTemporal	2010-08-31	2010
Ceratophrys cornuta	259	Ceratophrys cornuta	1	terraristikTemporal	2010-08-31	2010
Dyscophus guineti	259	Dyscophus guineti	1	terraristikTemporal	2010-08-31	2010
Atelopus spumarius	260	Atelopus spumarius	1	terraristikTemporal	2010-08-31	2010
Melanophryniscus stelzneri	260	Melanophryniscus stelzneri	1	terraristikTemporal	2010-08-31	2010
Rhinella schneideri	260	Bufo paracnemis	1	terraristikTemporal	2010-08-31	2010
Occidozyga lima	260	Occidozyga lima	1	terraristikTemporal	2010-08-31	2010
Phyllomedusa bicolor	260	Phyllomedusa bicolor	1	terraristikTemporal	2010-08-31	2010
Pelobatrachus nasuta	260	Megophrys nasuta	1	terraristikTemporal	2010-08-31	2010
Melanophryniscus stelzneri	261	Melanophryniscus stelzneri	1	terraristikTemporal	2010-08-31	2010
Dendrobates auratus	261	Dendrobates auratus	1	terraristikTemporal	2010-08-31	2010
Dendrobates leucomelas	261	Dendrobates leucomelas	1	terraristikTemporal	2010-08-31	2010
Dendrobates tinctorius	261	Dendrobates tinctorius	2	terraristikTemporal	2010-08-31	2010
Dyscophus guineti	263	Dyscophus guineti	1	terraristikTemporal	2010-08-31	2010
Theloderma corticale	265	Theloderma corticale	1	terraristikTemporal	2010-08-31	2010
Ameerega bassleri	266	Ameerega bassleri	1	terraristikTemporal	2010-08-31	2010
Neurergus kaiseri	266	Neurergus kaiseri	1	terraristikTemporal	2010-08-31	2010
Ameerega bassleri	267	Ameerega bassleri	1	terraristikTemporal	2010-08-31	2010
Neurergus kaiseri	267	Neurergus kaiseri	1	terraristikTemporal	2010-08-31	2010
Dendrobates tinctorius	268	Dendrobates tinctorius	1	terraristikTemporal	2010-08-31	2010
Excidobates mysteriosus	268	Excidobates mysteriosus	1	terraristikTemporal	2010-08-31	2010
Oophaga pumilio	268	Oophaga pumilio	1	terraristikTemporal	2010-08-31	2010
Phyllobates vittatus	268	Phyllobates vittatus	1	terraristikTemporal	2010-08-31	2010
Triturus marmoratus	269	Triturus marmoratus	1	terraristikTemporal	2010-08-31	2010
Ranitomeya reticulata	270	Ranitomeya reticulata	1	terraristikTemporal	2010-08-31	2010
Ambystoma mexicanum	271	Ambystoma mexicanum	1	terraristikTemporal	2010-08-31	2010
Melanophryniscus stelzneri	274	Melanophryniscus stelzneri	1	terraristikTemporal	2010-12-20	2010
Rhinella schneideri	274	Bufo paracnemis	1	terraristikTemporal	2010-12-20	2010
Lepidobatrachus laevis	274	Lepidobatrachus laevis	1	terraristikTemporal	2010-12-20	2010
Occidozyga lima	274	Occidozyga lima	1	terraristikTemporal	2010-12-20	2010
Phyllomedusa sauvagii	274	Phyllomedusa sauvagii	1	terraristikTemporal	2010-12-20	2010
Phlyctimantis maculatus	274	Kassina maculata	1	terraristikTemporal	2010-12-20	2010
Pelobatrachus nasuta	274	Megophrys nasuta	1	terraristikTemporal	2010-12-20	2010
Phrynomantis bifasciatus	274	Phrynomantis bifasciatus	1	terraristikTemporal	2010-12-20	2010
Anaxyrus speciosus	275	Bufo speciosus	1	terraristikTemporal	2010-12-20	2010
Lepidobatrachus laevis	275	Lepidobatrachus laevis	1	terraristikTemporal	2010-12-20	2010
Leptodactylus pentadactylus	275	Leptodactylus pentadactylus	1	terraristikTemporal	2010-12-20	2010
Rhinella margaritifera	277	Bufo margaritifer	1	terraristikTemporal	2010-12-20	2010
Hoplobatrachus tigerinus	277	Bufo typhonius	1	terraristikTemporal	2010-12-20	2010
Rentapia hosii	278	Pedostibes hosii	1	terraristikTemporal	2010-12-20	2010
Trachycephalus resinifictrix	278	Phrynohyas resinifictrix	1	terraristikTemporal	2010-12-20	2010
Agalychnis callidryas	278	Agalychnis callidryas	1	terraristikTemporal	2010-12-20	2010
Mantella aurantiaca	278	Mantella aurantiaca	1	terraristikTemporal	2010-12-20	2010
Theloderma gordoni	278	Theloderma gordoni	1	terraristikTemporal	2010-12-20	2010
Ranitomeya variabilis	281	Ranitomeya variabilis	1	terraristikTemporal	2010-12-20	2010
Ceratophrys cranwelli	282	Ceratophrys cranwelli	1	terraristikTemporal	2010-12-20	2010
Anaxyrus speciosus	283	Bufo speciosus	1	terraristikTemporal	2010-12-20	2010
Rhinella schneideri	283	Bufo paracnemis	1	terraristikTemporal	2010-12-20	2010
Lepidobatrachus laevis	283	Lepidobatrachus laevis	1	terraristikTemporal	2010-12-20	2010
Leptodactylus pentadactylus	283	Leptodactylus pentadactylus	1	terraristikTemporal	2010-12-20	2010
Dendrobates tinctorius	284	Dendrobates tinctorius	1	terraristikTemporal	2010-12-20	2010
Melanophryniscus stelzneri	286	Melanophryniscus stelzneri	1	terraristikTemporal	2010-12-20	2010
Ceratophrys stolzmanni	286	Ceratophrys stolzmanni	1	terraristikTemporal	2010-12-20	2010
Trachycephalus resinifictrix	286	Trachycephalus resinifictrix	1	terraristikTemporal	2010-12-20	2010
Ambystoma maculatum	286	Ambystoma maculatum	1	terraristikTemporal	2010-12-20	2010
Salamandra algira	286	Salamandra algira	1	terraristikTemporal	2010-12-20	2010
Ceratophrys cranwelli	288	Ceratophrys cranwelli	1	terraristikTemporal	2010-12-20	2010
Ceratophrys stolzmanni	288	Ceratophrys stolzmanni	1	terraristikTemporal	2010-12-20	2010
Salamandra salamandra	288	Salamandra salamandra	1	terraristikTemporal	2010-12-20	2010
Epipedobates anthonyi	289	Epipedobates anthonyi	1	terraristikTemporal	2010-12-20	2010
Oophaga pumilio	289	Oophaga pumilio	1	terraristikTemporal	2010-12-20	2010
Oophaga sylvatica	289	Oophaga sylvatica	1	terraristikTemporal	2010-12-20	2010
Dendrobates tinctorius	290	Dendrobates azureus	1	terraristikTemporal	2010-12-20	2010
Heterixalus rutenbergi	290	Heterixalus rutenbergi	1	terraristikTemporal	2010-12-20	2010
Hyperolius riggenbachi	292	Hyperolius riggenbachi	1	terraristikTemporal	2010-12-20	2010
Aneides flavipunctatus	294	Aneides flavipunctatus	1	terraristikTemporal	2010-12-20	2010
Bombina bombina	295	Bombina bombina	1	terraristikTemporal	2010-12-20	2010
Bombina variegata	295	Bombina variegata	1	terraristikTemporal	2010-12-20	2010
Barbarophryne brongersmai	295	Bufo brongersmai	1	terraristikTemporal	2010-12-20	2010
Bufotes viridis	295	Bufo viridis	1	terraristikTemporal	2010-12-20	2010
Epidalea calamita	295	Bufo calamita	1	terraristikTemporal	2010-12-20	2010
Pelobates fuscus	295	Pelobates fuscus	1	terraristikTemporal	2010-12-20	2010
Ambystoma opacum	295	Ambystoma opacum	1	terraristikTemporal	2010-12-20	2010
Ambystoma tigrinum	295	Ambystoma tigrinum	1	terraristikTemporal	2010-12-20	2010
Triturus carnifex	295	Triturus carnifex	1	terraristikTemporal	2010-12-20	2010
Tylototriton verrucosus	295	Tylototriton verrucosus	1	terraristikTemporal	2010-12-20	2010
Dendrobates tinctorius	300	Dendrobates tinctorius	1	terraristikTemporal	2010-12-20	2010
Phyllomedusa hypochondrialis	300	Phyllomedusa hypochondrialis	1	terraristikTemporal	2010-12-20	2010
Rhacophorus reinwardtii	302	Rhacophorus reinwardtii	1	terraristikTemporal	2010-12-20	2010
Rhinella granulosa	303	Bufo granulosus	1	terraristikTemporal	2010-12-20	2010
Rhinella pygmaea	303	Bufo pygmaeus	1	terraristikTemporal	2010-12-20	2010
Rhinella schneideri	303	Bufo paracnemis	1	terraristikTemporal	2010-12-20	2010
Ceratophrys cranwelli	303	Ceratophrys cranwelli	1	terraristikTemporal	2010-12-20	2010
Oophaga pumilio	303	Oophaga pumilio	1	terraristikTemporal	2010-12-20	2010
Phyllomedusa azurea	303	Phyllomedusa azurea	1	terraristikTemporal	2010-12-20	2010
Dermatonotus muelleri	303	Dermatonotus muelleri	1	terraristikTemporal	2010-12-20	2010
Oophaga pumilio	305	Oophaga pumilio	1	terraristikTemporal	2010-11-21	2010
Hyperolius riggenbachi	305	Hyperolius riggenbachi	1	terraristikTemporal	2010-11-21	2010
Pelobatrachus nasuta	306	Megophrys nasuta	1	terraristikTemporal	2010-07-13	2010
Alytes obstetricans	308	Alytes obstetricans	1	terraristikTemporal	2010-07-13	2010
Barbarophryne brongersmai	308	Bufo brongersmai	1	terraristikTemporal	2010-07-13	2010
Epidalea calamita	308	Bufo calamita	1	terraristikTemporal	2010-07-13	2010
Triturus carnifex	309	Triturus carnifex	1	terraristikTemporal	2010-11-21	2010
Ambystoma mexicanum	310	Ambystoma mexicanum	1	terraristikTemporal	2010-07-13	2010
Dendrobates tinctorius	313	Dendrobates tinctorius	1	terraristikTemporal	2010-11-21	2010
Ceratophrys cranwelli	314	Ceratophrys cranwelli	1	terraristikTemporal	2010-07-13	2010
Ceratophrys ornata	314	Ceratophrys ornata	1	terraristikTemporal	2010-07-13	2010
Oophaga pumilio	314	Oophaga pumilio	1	terraristikTemporal	2010-07-13	2010
Ranitomeya vanzolinii	314	Ranitomeya vanzolinii	1	terraristikTemporal	2010-07-13	2010
Ceratophrys cranwelli	315	Ceratophrys cranwelli	1	terraristikTemporal	2010-07-13	2010
Ceratophrys ornata	315	Ceratophrys ornata	1	terraristikTemporal	2010-07-13	2010
Ranitomeya vanzolinii	315	Ranitomeya vanzolinii	1	terraristikTemporal	2010-07-13	2010
Dendrobates tinctorius	318	Dendrobates tinctorius	1	terraristikTemporal	2010-07-13	2010
Oophaga histrionica	318	Oophaga histrionica	1	terraristikTemporal	2010-07-13	2010
Oophaga pumilio	318	Oophaga pumilio	1	terraristikTemporal	2010-07-13	2010
Dendrobates auratus	319	Dendrobates auratus	1	terraristikTemporal	2010-11-21	2010
Leptopelis christyi	324	Leptopelis christyi	1	terraristikTemporal	2010-07-13	2010
Leptopelis uluguruensis	324	Leptopelis uluguruensis	1	terraristikTemporal	2010-07-13	2010
Leptopelis vermiculatus	324	Leptopelis vermiculatus	1	terraristikTemporal	2010-07-13	2010
Melanophryniscus stelzneri	324	Melanophryniscus stelzneri	1	terraristikTemporal	2010-07-13	2010
Rentapia hosii	324	Pedostibes hosii	1	terraristikTemporal	2010-07-13	2010
Dendrobates auratus	324	Dendrobates auratus	1	terraristikTemporal	2010-07-13	2010
Dendrobates leucomelas	324	Dendrobates leucomelas	1	terraristikTemporal	2010-07-13	2010
Agalychnis callidryas	324	Agalychnis callidryas	1	terraristikTemporal	2010-07-13	2010
Afrixalus fornasini	324	Afrixalus fornasini	1	terraristikTemporal	2010-07-13	2010
Hyperolius argus	324	Hyperolius argus	1	terraristikTemporal	2010-07-13	2010
Hyperolius mitchelli	324	Hyperolius mitchelli	1	terraristikTemporal	2010-07-13	2010
Hyperolius puncticulatus	324	Hyperolius puncticulatus	1	terraristikTemporal	2010-07-13	2010
Kassina cochranae	324	Kassina cochranae	1	terraristikTemporal	2010-07-13	2010
Kassina senegalensis	324	Kassina senegalensis	1	terraristikTemporal	2010-07-13	2010
Nyctixalus pictus	324	Nyctixalus pictus	1	terraristikTemporal	2010-07-13	2010
Rhacophorus nigropalmatus	324	Rhacophorus nigropalmatus	1	terraristikTemporal	2010-07-13	2010
Theloderma asperum	324	Theloderma asperum	1	terraristikTemporal	2010-07-13	2010
Theloderma horridum	324	Theloderma horridum	1	terraristikTemporal	2010-07-13	2010
Herpele squalostoma	324	Herpele squalostoma	1	terraristikTemporal	2010-07-13	2010
Melanophryniscus stelzneri	326	Melanophryniscus stelzneri	1	terraristikTemporal	2010-07-13	2010
Litoria caerulea	326	Litoria caerulea	1	terraristikTemporal	2010-07-13	2010
Dendrobates tinctorius	327	Dendrobates tinctorius	1	terraristikTemporal	2010-11-21	2010
Excidobates mysteriosus	327	Dendrobates mysteriosus	1	terraristikTemporal	2010-11-21	2010
Ceratophrys cranwelli	328	Ceratophrys cranwelli	1	terraristikTemporal	2010-07-13	2010
Hyla japonica	331	Hyla japonica	1	terraristikTemporal	2010-11-21	2010
Agalychnis callidryas	331	Agalychnis callidryas	1	terraristikTemporal	2010-11-21	2010
Agalychnis spurrelli	331	Agalychnis spurrelli	1	terraristikTemporal	2010-11-21	2010
Engystomops pustulosus	331	Physalaemus pustulosus	1	terraristikTemporal	2010-11-21	2010
Pelobatrachus nasuta	331	Megophrys nasuta	1	terraristikTemporal	2010-11-21	2010
Polypedates otilophus	331	Polypedates otilophus	1	terraristikTemporal	2010-11-21	2010
Theloderma asperum	332	Theloderma asperum	1	terraristikTemporal	2010-07-13	2010
Ambystoma maculatum	332	Ambystoma maculatum	1	terraristikTemporal	2010-07-13	2010
Ambystoma talpoideum	332	Ambystoma talpoideum	1	terraristikTemporal	2010-07-13	2010
Ambystoma tigrinum	332	Ambystoma tigrinum	1	terraristikTemporal	2010-07-13	2010
Laotriton laoensis	332	Laotriton laoensis	1	terraristikTemporal	2010-07-13	2010
Trachycephalus resinifictrix	333	Trachycephalus resinifictrix	1	terraristikTemporal	2010-11-21	2010
Triturus carnifex	334	Triturus carnifex	1	terraristikTemporal	2010-07-13	2010
Triturus marmoratus	334	Triturus marmoratus	1	terraristikTemporal	2010-07-13	2010
Triturus carnifex	336	Triturus carnifex	1	terraristikTemporal	2010-07-13	2010
Triturus marmoratus	336	Triturus marmoratus	1	terraristikTemporal	2010-07-13	2010
Oophaga pumilio	338	Oophaga pumilio	1	terraristikTemporal	2010-07-13	2010
Ranitomeya vanzolinii	340	Ranitomeya vanzolinii	1	terraristikTemporal	2010-07-13	2010
Boana punctata	340	Hyla punctata	1	terraristikTemporal	2010-07-13	2010
Bombina bombina	341	Bombina bombina	1	terraristikTemporal	2010-11-21	2010
Bombina variegata	341	Bombina variegata	1	terraristikTemporal	2010-11-21	2010
Barbarophryne brongersmai	341	Bufo brongersmai	1	terraristikTemporal	2010-11-21	2010
Epidalea calamita	341	Bufo calamita	1	terraristikTemporal	2010-11-21	2010
Vandijkophrynus robinsoni	341	Bufo robinsoni	1	terraristikTemporal	2010-11-21	2010
Pelobates fuscus	341	Pelobates fuscus	1	terraristikTemporal	2010-11-21	2010
Ambystoma mexicanum	341	Ambystoma mexicanum	1	terraristikTemporal	2010-11-21	2010
Neurergus kaiseri	341	Neurergus kaiseri	1	terraristikTemporal	2010-11-21	2010
Triturus carnifex	341	Triturus carnifex	1	terraristikTemporal	2010-11-21	2010
Triturus marmoratus	341	Triturus marmoratus	1	terraristikTemporal	2010-11-21	2010
Salamandra salamandra	341	Salamandra salamandra	1	terraristikTemporal	2010-11-21	2010
Typhlonectes compressicauda	342	Typhlonectes compressicauda	1	terraristikTemporal	2010-07-13	2010
Mantella laevigata	347	Mantella laevigata	1	terraristikTemporal	2010-11-21	2010
Mantella viridis	347	Mantella viridis	1	terraristikTemporal	2010-11-21	2010
Dendrobates auratus	348	Dendrobates auratus	1	terraristikTemporal	2010-07-13	2010
Dendrobates leucomelas	348	Dendrobates leucomelas	1	terraristikTemporal	2010-07-13	2010
Dendrobates tinctorius	348	Dendrobates azureus	1	terraristikTemporal	2010-07-13	2010
Oophaga pumilio	348	Oophaga pumilio	1	terraristikTemporal	2010-07-13	2010
Rhinella schneideri	351	Bufo paracnemis	1	terraristikTemporal	2010-11-21	2010
Phyllobates vittatus	351	Phyllobates vittatus	1	terraristikTemporal	2010-11-21	2010
Pyxicephalus edulis	351	Pyxicephalus edulis	1	terraristikTemporal	2010-11-21	2010
Alytes obstetricans	352	Alytes obstetricans	1	terraristikTemporal	2010-07-13	2010
Barbarophryne brongersmai	352	Bufo brongersmai	1	terraristikTemporal	2010-07-13	2010
Epidalea calamita	352	Bufo calamita	1	terraristikTemporal	2010-07-13	2010
Dendrobates tinctorius	352	Dendrobates tinctorius	1	terraristikTemporal	2010-07-13	2010
Triturus carnifex	352	Triturus carnifex	1	terraristikTemporal	2010-07-13	2010
Triturus cristatus	352	Triturus cristatus	1	terraristikTemporal	2010-07-13	2010
Triturus marmoratus	352	Triturus marmoratus	1	terraristikTemporal	2010-07-13	2010
Ceratophrys stolzmanni	353	Ceratophrys stolzmanni	1	terraristikTemporal	2010-11-21	2010
Ranitomeya summersi	354	Ranitomeya summersi	1	terraristikTemporal	2010-07-13	2010
Ranitomeya ventrimaculata	354	Ranitomeya ventrimaculata	1	terraristikTemporal	2010-07-13	2010
Ceratophrys stolzmanni	355	Ceratophrys stolzmanni	1	terraristikTemporal	2010-11-21	2010
Dendrobates leucomelas	355	Dendrobates leucomelas	1	terraristikTemporal	2010-11-21	2010
Ambystoma mexicanum	355	Ambystoma mexicanum	1	terraristikTemporal	2010-11-21	2010
Ceratophrys cranwelli	356	Ceratophrys cranwelli	1	terraristikTemporal	2010-07-13	2010
Dendrobates tinctorius	357	Dendrobates tinctorius	1	terraristikTemporal	2010-11-21	2010
Ranitomeya reticulata	357	Ranitomeya reticulata	1	terraristikTemporal	2010-11-21	2010
Dendrobates leucomelas	359	Dendrobates leucomelas	1	terraristikTemporal	2010-11-21	2010
Pipa pipa	359	Pipa pipa	1	terraristikTemporal	2010-11-21	2010
Ambystoma opacum	359	Ambystoma opacum	1	terraristikTemporal	2010-11-21	2010
Lissotriton helveticus	359	Lissotriton helveticus	1	terraristikTemporal	2010-11-21	2010
Lissotriton italicus	359	Lissotriton italicus	2	terraristikTemporal	2010-11-21	2010
Phyllobates vittatus	360	Phyllobates vittatus	1	terraristikTemporal	2010-07-13	2010
Theloderma asperum	360	Theloderma asperum	1	terraristikTemporal	2010-07-13	2010
Epipedobates anthonyi	361	Epipedobates anthonyi	1	terraristikTemporal	2010-11-21	2010
Dendrobates tinctorius	361	Dendrobates tinctorius	1	terraristikTemporal	2010-11-21	2010
Phyllobates vittatus	361	Phyllobates vittatus	1	terraristikTemporal	2010-11-21	2010
Ranitomeya reticulata	365	Ranitomeya reticulata	1	terraristikTemporal	2010-02-25	2010
Dendrobates tinctorius	370	Dendrobates tinctorius	1	terraristikTemporal	2010-02-25	2010
Rhaebo guttatus	371	Bufo guttatus	1	terraristikTemporal	2010-02-25	2010
Boana boans	371	Hyla boans	1	terraristikTemporal	2010-02-25	2010
Dendropsophus marmoratus	371	Hyla marmorata	1	terraristikTemporal	2010-02-25	2010
Hyla cinerea	371	Hyla cinerea	1	terraristikTemporal	2010-02-25	2010
Odorrana livida	371	Rana livida	1	terraristikTemporal	2010-02-25	2010
Dendrobates tinctorius	373	Dendrobates tinctorius	1	terraristikTemporal	2010-02-25	2010
Phyllobates lugubris	373	Phyllobates lugubris	1	terraristikTemporal	2010-02-25	2010
Phyllobates vittatus	373	Phyllobates vittatus	1	terraristikTemporal	2010-02-25	2010
Triturus dobrogicus	374	Triturus dobrogicus	1	terraristikTemporal	2010-02-25	2010
Triturus dobrogicus	376	Triturus dobrogicus	1	terraristikTemporal	2010-02-25	2010
Dendrobates tinctorius	378	Dendrobates tinctorius	1	terraristikTemporal	2010-02-25	2010
Dendrobates leucomelas	379	Dendrobates leucomelas	1	terraristikTemporal	2010-02-25	2010
Dendrobates tinctorius	379	Dendrobates tinctorius	1	terraristikTemporal	2010-02-25	2010
Oophaga pumilio	379	Oophaga pumilio	1	terraristikTemporal	2010-02-25	2010
Ranitomeya reticulata	379	Ranitomeya reticulata	1	terraristikTemporal	2010-02-25	2010
Mantella madagascariensis	379	Mantella madagascariensis	1	terraristikTemporal	2010-02-25	2010
Phlyctimantis maculatus	380	Kassina maculata	1	terraristikTemporal	2010-02-25	2010
Pelobatrachus nasuta	380	Megophrys nasuta	1	terraristikTemporal	2010-02-25	2010
Dendrobates leucomelas	381	Dendrobates leucomelas	1	terraristikTemporal	2010-02-25	2010
Dendropsophus leucophyllatus	381	Hyla leucophyllata	1	terraristikTemporal	2010-02-25	2010
Hyla versicolor	382	Hyla versicolor	1	terraristikTemporal	2010-02-25	2010
Litoria caerulea	382	Litoria caerulea	1	terraristikTemporal	2010-02-25	2010
Phlyctimantis maculatus	382	Kassina maculata	1	terraristikTemporal	2010-02-25	2010
Pelobatrachus nasuta	382	Megophrys nasuta	1	terraristikTemporal	2010-02-25	2010
Cynops orientalis	382	Cynops orientalis	1	terraristikTemporal	2010-02-25	2010
Hyla versicolor	384	Hyla versicolor	1	terraristikTemporal	2010-02-25	2010
Cynops orientalis	384	Cynops orientalis	1	terraristikTemporal	2010-02-25	2010
Adelphobates galactonotus	387	Dendrobates galactonotus	1	terraristikTemporal	2010-02-25	2010
Dendrobates auratus	387	Dendrobates auratus	1	terraristikTemporal	2010-02-25	2010
Dendrobates tinctorius	387	Dendrobates azureus	1	terraristikTemporal	2010-02-25	2010
Dendrobates auratus	388	Dendrobates auratus	1	terraristikTemporal	2010-02-25	2010
Dendrobates tinctorius	388	Dendrobates tinctorius	1	terraristikTemporal	2010-02-25	2010
Dendropsophus leucophyllatus	392	Hyla leucophyllata	1	terraristikTemporal	2010-02-25	2010
Dendrobates leucomelas	393	Dendrobates leucomelas	1	terraristikTemporal	2010-02-25	2010
Bombina bombina	394	Bombina bombina	1	terraristikTemporal	2010-04-16	2010
Bombina variegata	394	Bombina variegata	1	terraristikTemporal	2010-04-16	2010
Bombina bombina	395	Bombina bombina	1	terraristikTemporal	2010-04-16	2010
Bombina variegata	395	Bombina variegata	1	terraristikTemporal	2010-04-16	2010
Bombina variegata	396	Bombina variegata	1	terraristikTemporal	2010-04-16	2010
Dendrobates tinctorius	396	Dendrobates tinctorius	1	terraristikTemporal	2010-04-16	2010
Phyllobates vittatus	396	Phyllobates vittatus	1	terraristikTemporal	2010-04-16	2010
Ranitomeya imitator	396	Ranitomeya imitator	1	terraristikTemporal	2010-04-16	2010
Bombina variegata	397	Bombina variegata	1	terraristikTemporal	2010-04-16	2010
Dendrobates tinctorius	397	Dendrobates tinctorius	1	terraristikTemporal	2010-04-16	2010
Phyllobates vittatus	397	Phyllobates vittatus	1	terraristikTemporal	2010-04-16	2010
Ranitomeya imitator	397	Ranitomeya imitator	1	terraristikTemporal	2010-04-16	2010
Bombina bombina	398	Bombina bombina	1	terraristikTemporal	2010-04-16	2010
Bombina variegata	398	Bombina variegata	1	terraristikTemporal	2010-04-16	2010
Bufotes viridis	398	Bufo viridis	1	terraristikTemporal	2010-04-16	2010
Epidalea calamita	398	Bufo calamita	1	terraristikTemporal	2010-04-16	2010
Dendrobates tinctorius	398	Dendrobates tinctorius	1	terraristikTemporal	2010-04-16	2010
Phyllobates vittatus	398	Phyllobates vittatus	1	terraristikTemporal	2010-04-16	2010
Ranitomeya imitator	398	Ranitomeya imitator	1	terraristikTemporal	2010-04-16	2010
Pelobates fuscus	398	Pelobates fuscus	1	terraristikTemporal	2010-04-16	2010
Dendrobates tinctorius	399	Dendrobates azureus	1	terraristikTemporal	2010-04-16	2010
Dendrobates tinctorius	400	Dendrobates azureus	1	terraristikTemporal	2010-04-16	2010
Hyla arborea	401	Hyla arborea	1	terraristikTemporal	2010-04-16	2010
Adelphobates castaneoticus	402	Adelphobates castaneoticus	1	terraristikTemporal	2010-04-16	2010
Dendrobates tinctorius	402	Dendrobates tinctorius	1	terraristikTemporal	2010-04-16	2010
Excidobates mysteriosus	402	Excidobates mysteriosus	1	terraristikTemporal	2010-04-16	2010
Adelphobates castaneoticus	403	Adelphobates castaneoticus	1	terraristikTemporal	2010-04-16	2010
Dendrobates tinctorius	403	Dendrobates tinctorius	1	terraristikTemporal	2010-04-16	2010
Excidobates mysteriosus	403	Excidobates mysteriosus	1	terraristikTemporal	2010-04-16	2010
Pelobatrachus nasuta	404	Megophrys nasuta	1	terraristikTemporal	2010-04-16	2010
Plethodon vehiculum	404	Plethodon vehiculum	1	terraristikTemporal	2010-04-16	2010
Pelobatrachus nasuta	405	Megophrys nasuta	1	terraristikTemporal	2010-04-16	2010
Plethodon vehiculum	405	Plethodon vehiculum	1	terraristikTemporal	2010-04-16	2010
Dendrobates tinctorius	406	Dendrobates azureus	1	terraristikTemporal	2010-04-16	2010
Trachycephalus resinifictrix	406	Trachycephalus resinifictrix	1	terraristikTemporal	2010-04-16	2010
Hyla arborea	409	Hyla arborea	1	terraristikTemporal	2010-04-16	2010
Ceratophrys cranwelli	410	Ceratophrys cranwelli	1	terraristikTemporal	2010-04-16	2010
Dendrobates auratus	410	Dendrobates auratus	1	terraristikTemporal	2010-04-16	2010
Dendrobates tinctorius	410	Dendrobates tinctorius	1	terraristikTemporal	2010-04-16	2010
Oophaga pumilio	410	Oophaga pumilio	1	terraristikTemporal	2010-04-16	2010
Cynops orientalis	410	Cynops orientalis	1	terraristikTemporal	2010-04-16	2010
Bombina variegata	411	Bombina variegata	1	terraristikTemporal	2010-04-16	2010
Anaxyrus terrestris	411	Bufo terrestris	1	terraristikTemporal	2010-04-16	2010
Bufotes viridis	411	Bufo viridis	1	terraristikTemporal	2010-04-16	2010
Vandijkophrynus robinsoni	411	Bufo robinsoni	1	terraristikTemporal	2010-04-16	2010
Xenopus laevis	411	Xenopus laevis	1	terraristikTemporal	2010-04-16	2010
Bombina variegata	412	Bombina variegata	1	terraristikTemporal	2010-04-16	2010
Anaxyrus terrestris	412	Bufo terrestris	1	terraristikTemporal	2010-04-16	2010
Bufotes viridis	412	Bufo viridis	1	terraristikTemporal	2010-04-16	2010
Vandijkophrynus robinsoni	412	Bufo robinsoni	1	terraristikTemporal	2010-04-16	2010
Xenopus laevis	412	Xenopus laevis	1	terraristikTemporal	2010-04-16	2010
Ceratophrys cranwelli	415	Ceratophrys cranwelli	1	terraristikTemporal	2010-04-16	2010
Siren lacertina	415	Siren lacertina	1	terraristikTemporal	2010-04-16	2010
Ceratophrys cornuta	416	Ceratophrys cornuta	1	terraristikTemporal	2010-04-16	2010
Ceratophrys cornuta	417	Ceratophrys cornuta	1	terraristikTemporal	2010-04-16	2010
Dendropsophus leucophyllatus	420	Hyla leucophyllata	1	terraristikTemporal	2010-04-16	2010
Dendropsophus leucophyllatus	421	Hyla leucophyllata	1	terraristikTemporal	2010-04-16	2010
Ichthyosaura alpestris	422	Triturus alpestris	1	terraristikTemporal	2010-04-16	2010
Triturus cristatus	422	Triturus cristatus	1	terraristikTemporal	2010-04-16	2010
Ichthyosaura alpestris	423	Triturus alpestris	1	terraristikTemporal	2010-04-16	2010
Triturus cristatus	423	Triturus cristatus	1	terraristikTemporal	2010-04-16	2010
Pelobatrachus nasuta	426	Megophrys nasuta	1	terraristikTemporal	2010-04-16	2010
Pelobatrachus nasuta	427	Megophrys nasuta	1	terraristikTemporal	2010-04-16	2010
Cynops pyrrhogaster	428	Cynops pyrrhogaster	1	terraristikTemporal	2010-04-16	2010
Ichthyosaura alpestris	428	Triturus alpestris	1	terraristikTemporal	2010-04-16	2010
Triturus karelinii	428	Triturus karelinii	1	terraristikTemporal	2010-04-16	2010
Cynops pyrrhogaster	429	Cynops pyrrhogaster	1	terraristikTemporal	2010-04-16	2010
Ichthyosaura alpestris	429	Triturus alpestris	1	terraristikTemporal	2010-04-16	2010
Triturus karelinii	429	Triturus karelinii	1	terraristikTemporal	2010-04-16	2010
Bombina bombina	432	Bombina bombina	1	terraristikTemporal	2010-04-16	2010
Bufotes viridis	432	Bufo viridis	1	terraristikTemporal	2010-04-16	2010
Dendrobates auratus	432	Dendrobates auratus	1	terraristikTemporal	2010-04-16	2010
Dendrobates tinctorius	432	Dendrobates tinctorius	1	terraristikTemporal	2010-04-16	2010
Excidobates mysteriosus	432	Dendrobates mysteriosus	1	terraristikTemporal	2010-04-16	2010
Phyllobates terribilis	432	Phyllobates terribilis	1	terraristikTemporal	2010-04-16	2010
Hyla arborea	432	Hyla arborea	1	terraristikTemporal	2010-04-16	2010
Pleurodeles waltl	432	Pleurodeles waltl	1	terraristikTemporal	2010-04-16	2010
Dendrobates leucomelas	434	Dendrobates leucomelas	1	terraristikTemporal	2010-04-16	2010
Phyllobates terribilis	434	Phyllobates terribilis	1	terraristikTemporal	2010-04-16	2010
Dendrobates leucomelas	435	Dendrobates leucomelas	1	terraristikTemporal	2010-04-16	2010
Phyllobates terribilis	435	Phyllobates terribilis	1	terraristikTemporal	2010-04-16	2010
Dendrobates tinctorius	437	Dendrobates tinctorius	1	terraristikTemporal	2010-04-16	2010
Oophaga pumilio	437	Oophaga pumilio	1	terraristikTemporal	2010-04-16	2010
Dendrobates auratus	438	Dendrobates auratus	1	terraristikTemporal	2009-02-12	2009
Dendrobates tinctorius	439	Dendrobates tinctorius	1	terraristikTemporal	2009-11-05	2009
Ingerophrynus galeatus	441	Bufo galeatus	1	terraristikTemporal	2011-09-09	2011
Dendrobates leucomelas	441	Dendrobates leucomelas	1	terraristikTemporal	2011-09-09	2011
Dendrobates tinctorius	441	Dendrobates tinctorius	1	terraristikTemporal	2011-09-09	2011
Phyllobates vittatus	441	Phyllobates vittatus	1	terraristikTemporal	2011-09-09	2011
Trachycephalus resinifictrix	441	Phrynohyas resinifictrix	1	terraristikTemporal	2011-09-09	2011
Mantella aurantiaca	441	Mantella aurantiaca	1	terraristikTemporal	2011-09-09	2011
Mantella madagascariensis	441	Mantella madagascariensis	1	terraristikTemporal	2011-09-09	2011
Kurixalus odontotarsus	441	Kurixalus odontotarsus	1	terraristikTemporal	2011-09-09	2011
Theloderma corticale	443	Theloderma corticale	1	terraristikTemporal	2009-11-03	2009
Ingerophrynus galeatus	445	Bufo galeatus	1	terraristikTemporal	2011-09-10	2011
Dendrobates leucomelas	445	Dendrobates leucomelas	1	terraristikTemporal	2011-09-10	2011
Dendrobates tinctorius	445	Dendrobates tinctorius	1	terraristikTemporal	2011-09-10	2011
Phyllobates vittatus	445	Phyllobates vittatus	1	terraristikTemporal	2011-09-10	2011
Trachycephalus resinifictrix	445	Phrynohyas resinifictrix	1	terraristikTemporal	2011-09-10	2011
Mantella aurantiaca	445	Mantella aurantiaca	1	terraristikTemporal	2011-09-10	2011
Kurixalus odontotarsus	445	Kurixalus odontotarsus	1	terraristikTemporal	2011-09-10	2011
Hyla gratiosa	446	Hyla gratiosa	1	terraristikTemporal	2009-11-05	2009
Melanophryniscus stelzneri	447	Melanophryniscus stelzneri	1	terraristikTemporal	2010-09-08	2010
Dendrobates auratus	447	Dendrobates auratus	1	terraristikTemporal	2010-09-08	2010
Dendrobates leucomelas	447	Dendrobates leucomelas	1	terraristikTemporal	2010-09-08	2010
Dendrobates tinctorius	447	Dendrobates tinctorius	1	terraristikTemporal	2010-09-08	2010
Excidobates mysteriosus	447	Excidobates mysteriosus	1	terraristikTemporal	2010-09-08	2010
Oophaga pumilio	447	Oophaga pumilio	1	terraristikTemporal	2010-09-08	2010
Phyllobates vittatus	447	Phyllobates vittatus	1	terraristikTemporal	2010-09-08	2010
Ranitomeya imitator	447	Ranitomeya imitator	1	terraristikTemporal	2010-09-08	2010
Ranitomeya reticulata	447	Ranitomeya reticulata	1	terraristikTemporal	2010-09-08	2010
Hyperolius argus	447	Hyperolius argus	1	terraristikTemporal	2010-09-08	2010
Phlyctimantis maculatus	447	Kassina maculata	1	terraristikTemporal	2010-09-08	2010
Pelobatrachus nasuta	447	Megophrys nasuta	1	terraristikTemporal	2010-09-08	2010
Phrynomantis bifasciatus	447	Phrynomantis bifasciatus	1	terraristikTemporal	2010-09-08	2010
Polypedates colletti	447	Polypedates colletti	1	terraristikTemporal	2010-09-08	2010
Alytes obstetricans	448	Alytes obstetricans	1	terraristikTemporal	2011-09-10	2011
Bufotes viridis	448	Bufo viridis	1	terraristikTemporal	2011-09-10	2011
Epidalea calamita	448	Bufo calamita	1	terraristikTemporal	2011-09-10	2011
Bombina orientalis	449	Bombina orientalis	1	terraristikTemporal	2009-02-07	2009
Bombina orientalis	453	Bombina orientalis	1	terraristikTemporal	2009-02-08	2009
Bufotes viridis	454	Bufo viridis	1	terraristikTemporal	2009-11-05	2009
Dendrobates auratus	454	Dendrobates auratus	1	terraristikTemporal	2009-11-05	2009
Pelobates fuscus	454	Pelobates fuscus	1	terraristikTemporal	2009-11-05	2009
Ceratophrys cornuta	455	Ceratophrys cornuta	1	terraristikTemporal	2010-09-08	2010
Epipedobates tricolor	455	Epipedobates tricolor	1	terraristikTemporal	2010-09-08	2010
Ambystoma andersoni	455	Ambystoma andersoni	1	terraristikTemporal	2010-09-08	2010
Oophaga pumilio	457	Oophaga pumilio	1	terraristikTemporal	2009-02-07	2009
Litoria caerulea	457	Litoria caerulea	1	terraristikTemporal	2009-02-07	2009
Cynops orientalis	457	Cynops orientalis	1	terraristikTemporal	2009-02-07	2009
Mantella aurantiaca	458	Mantella aurantiaca	1	terraristikTemporal	2009-02-12	2009
Mantella laevigata	458	Mantella laevigata	1	terraristikTemporal	2009-02-12	2009
Lepidobatrachus laevis	459	Lepidobatrachus laevis	1	terraristikTemporal	2009-11-02	2009
Lepidobatrachus laevis	460	Lepidobatrachus laevis	1	terraristikTemporal	2009-11-02	2009
Heterixalus alboguttatus	461	Heterixalus alboguttatus	1	terraristikTemporal	2010-09-08	2010
Heterixalus alboguttatus	462	Heterixalus alboguttatus	1	terraristikTemporal	2010-09-08	2010
Phyllobates vittatus	464	Phyllobates vittatus	1	terraristikTemporal	2011-09-10	2011
Phyllobates terribilis	466	Phyllobates terribilis	1	terraristikTemporal	2009-02-09	2009
Pelobatrachus nasuta	466	Megophrys nasuta	1	terraristikTemporal	2009-02-09	2009
Melanophryniscus stelzneri	468	Melanophryniscus stelzneri	1	terraristikTemporal	2010-09-08	2010
Ceratophrys cranwelli	468	Ceratophrys cranwelli	1	terraristikTemporal	2010-09-08	2010
Dendrobates auratus	468	Dendrobates auratus	1	terraristikTemporal	2010-09-08	2010
Dendrobates leucomelas	468	Dendrobates leucomelas	1	terraristikTemporal	2010-09-08	2010
Dendrobates tinctorius	468	Dendrobates tinctorius	2	terraristikTemporal	2010-09-08	2010
Bombina maxima	469	Bombina maxima	1	terraristikTemporal	2011-09-09	2011
Bombina variegata	469	Bombina variegata	1	terraristikTemporal	2011-09-09	2011
Bufotes viridis	469	Bufo viridis	1	terraristikTemporal	2011-09-09	2011
Epidalea calamita	469	Bufo calamita	1	terraristikTemporal	2011-09-09	2011
Dendrobates tinctorius	469	Dendrobates tinctorius	1	terraristikTemporal	2011-09-09	2011
Hyla arborea	469	Hyla arborea	1	terraristikTemporal	2011-09-09	2011
Phyllomedusa sauvagii	469	Phyllomedusa sauvagii	1	terraristikTemporal	2011-09-09	2011
Pelobates fuscus	469	Pelobates fuscus	1	terraristikTemporal	2011-09-09	2011
Triturus carnifex	469	Triturus carnifex	1	terraristikTemporal	2011-09-09	2011
Triturus cristatus	469	Triturus cristatus	1	terraristikTemporal	2011-09-09	2011
Triturus dobrogicus	469	Triturus dobrogicus	1	terraristikTemporal	2011-09-09	2011
Triturus marmoratus	469	Triturus marmoratus	1	terraristikTemporal	2011-09-09	2011
Ceratophrys cranwelli	470	Ceratophrys cranwelli	1	terraristikTemporal	2009-02-11	2009
Ceratophrys ornata	470	Ceratophrys ornata	1	terraristikTemporal	2009-02-11	2009
Dendrobates auratus	470	Dendrobates auratus	1	terraristikTemporal	2009-02-11	2009
Dyscophus guineti	470	Dyscophus guineti	1	terraristikTemporal	2009-02-11	2009
Pyxicephalus adspersus	470	Pyxicephalus adspersus	1	terraristikTemporal	2009-02-11	2009
Litoria caerulea	472	Litoria caerulea	1	terraristikTemporal	2010-09-08	2010
Dendrobates tinctorius	473	Dendrobates tinctorius	1	terraristikTemporal	2011-09-09	2011
Oophaga pumilio	473	Oophaga pumilio	1	terraristikTemporal	2011-09-09	2011
Phyllomedusa sauvagii	473	Phyllomedusa sauvagii	1	terraristikTemporal	2011-09-09	2011
Melanophryniscus stelzneri	476	Melanophryniscus stelzneri	1	terraristikTemporal	2010-09-08	2010
Dendrobates auratus	476	Dendrobates auratus	1	terraristikTemporal	2010-09-08	2010
Dendrobates leucomelas	476	Dendrobates leucomelas	1	terraristikTemporal	2010-09-08	2010
Dendrobates tinctorius	476	Dendrobates tinctorius	2	terraristikTemporal	2010-09-08	2010
Epipedobates anthonyi	478	Epipedobates anthonyi	1	terraristikTemporal	2009-02-13	2009
Cynops orientalis	478	Cynops orientalis	1	terraristikTemporal	2009-02-13	2009
Dendrobates tinctorius	479	Dendrobates tinctorius	1	terraristikTemporal	2009-11-02	2009
Bombina maxima	481	Bombina maxima	1	terraristikTemporal	2011-09-09	2011
Bombina variegata	481	Bombina variegata	1	terraristikTemporal	2011-09-09	2011
Bufotes viridis	481	Bufo viridis	1	terraristikTemporal	2011-09-09	2011
Epidalea calamita	481	Bufo calamita	1	terraristikTemporal	2011-09-09	2011
Hyla arborea	481	Hyla arborea	1	terraristikTemporal	2011-09-09	2011
Pelobates fuscus	481	Pelobates fuscus	1	terraristikTemporal	2011-09-09	2011
Triturus carnifex	481	Triturus carnifex	1	terraristikTemporal	2011-09-09	2011
Triturus cristatus	481	Triturus cristatus	1	terraristikTemporal	2011-09-09	2011
Triturus dobrogicus	481	Triturus dobrogicus	1	terraristikTemporal	2011-09-09	2011
Triturus marmoratus	481	Triturus marmoratus	1	terraristikTemporal	2011-09-09	2011
Tylototriton kweichowensis	481	Tylototriton kweichowensis	1	terraristikTemporal	2011-09-09	2011
Calyptocephalella gayi	483	Caudiverbera caudiverbera	1	terraristikTemporal	2010-09-08	2010
Litoria infrafrenata	483	Litoria infrafrenata	1	terraristikTemporal	2010-09-08	2010
Bombina maxima	484	Bombina maxima	1	terraristikTemporal	2011-09-09	2011
Bombina variegata	484	Bombina variegata	1	terraristikTemporal	2011-09-09	2011
Bufotes viridis	484	Bufo viridis	1	terraristikTemporal	2011-09-09	2011
Epidalea calamita	484	Bufo calamita	1	terraristikTemporal	2011-09-09	2011
Hyla arborea	484	Hyla arborea	1	terraristikTemporal	2011-09-09	2011
Pelobates fuscus	484	Pelobates fuscus	1	terraristikTemporal	2011-09-09	2011
Triturus carnifex	484	Triturus carnifex	1	terraristikTemporal	2011-09-09	2011
Triturus cristatus	484	Triturus cristatus	1	terraristikTemporal	2011-09-09	2011
Triturus dobrogicus	484	Triturus dobrogicus	1	terraristikTemporal	2011-09-09	2011
Triturus marmoratus	484	Triturus marmoratus	1	terraristikTemporal	2011-09-09	2011
Tylototriton kweichowensis	484	Tylototriton kweichowensis	1	terraristikTemporal	2011-09-09	2011
Incilius alvarius	486	Bufo alvarius	1	terraristikTemporal	2009-11-02	2009
Ceratophrys cranwelli	486	Ceratophrys cranwelli	1	terraristikTemporal	2009-11-02	2009
Ranitomeya ventrimaculata	486	Ranitomeya ventrimaculata	1	terraristikTemporal	2009-11-02	2009
Pelobatrachus nasuta	486	Megophrys nasuta	1	terraristikTemporal	2009-11-02	2009
Odorrana hosii	486	Rana hosii	1	terraristikTemporal	2009-11-02	2009
Pulchrana signata	486	Rana signata	1	terraristikTemporal	2009-11-02	2009
Theloderma corticale	486	Theloderma corticale	1	terraristikTemporal	2009-11-02	2009
Herpele squalostoma	486	Herpele squalostoma	1	terraristikTemporal	2009-11-02	2009
Bombina orientalis	490	Bombina orientalis	1	terraristikTemporal	2009-11-02	2009
Bombina maxima	492	Bombina maxima	1	terraristikTemporal	2011-09-10	2011
Bombina variegata	492	Bombina variegata	1	terraristikTemporal	2011-09-10	2011
Bufotes viridis	492	Bufo viridis	1	terraristikTemporal	2011-09-10	2011
Epidalea calamita	492	Bufo calamita	1	terraristikTemporal	2011-09-10	2011
Hyla arborea	492	Hyla arborea	1	terraristikTemporal	2011-09-10	2011
Pelobates fuscus	492	Pelobates fuscus	1	terraristikTemporal	2011-09-10	2011
Triturus carnifex	492	Triturus carnifex	1	terraristikTemporal	2011-09-10	2011
Triturus cristatus	492	Triturus cristatus	1	terraristikTemporal	2011-09-10	2011
Triturus dobrogicus	492	Triturus dobrogicus	1	terraristikTemporal	2011-09-10	2011
Triturus marmoratus	492	Triturus marmoratus	1	terraristikTemporal	2011-09-10	2011
Ceratophrys cranwelli	494	Ceratophrys cranwelli	1	terraristikTemporal	2009-11-05	2009
Pelobatrachus nasuta	494	Megophrys nasuta	1	terraristikTemporal	2009-11-05	2009
Odorrana hosii	494	Rana hosii	1	terraristikTemporal	2009-11-05	2009
Pulchrana signata	494	Rana signata	1	terraristikTemporal	2009-11-05	2009
Ambystoma opacum	494	Ambystoma opacum	1	terraristikTemporal	2009-11-05	2009
Herpele squalostoma	494	Herpele squalostoma	1	terraristikTemporal	2009-11-05	2009
Ameerega silverstonei	495	Ameerega silverstonei	1	terraristikTemporal	2010-09-08	2010
Ambystoma mavortium	497	Ambystoma mavortium	1	terraristikTemporal	2009-02-12	2009
Ambystoma opacum	497	Ambystoma opacum	1	terraristikTemporal	2009-02-12	2009
Desmognathus fuscus	497	Desmognathus fuscus	1	terraristikTemporal	2009-02-12	2009
Desmognathus quadramaculatus	497	Desmognathus quadramaculatus	1	terraristikTemporal	2009-02-12	2009
Plethodon glutinosus	497	Plethodon glutinosus	1	terraristikTemporal	2009-02-12	2009
Cynops cyanurus	497	Cynops cyanurus	1	terraristikTemporal	2009-02-12	2009
Paramesotriton chinensis	497	Paramesotriton chinensis	1	terraristikTemporal	2009-02-12	2009
Triturus marmoratus	497	Triturus marmoratus	1	terraristikTemporal	2009-02-12	2009
Salamandra salamandra	497	Salamandra salamandra	1	terraristikTemporal	2009-02-12	2009
Ceratophrys aurita	499	Ceratophrys aurita	1	terraristikTemporal	2010-09-08	2010
Dendrobates auratus	499	Dendrobates auratus	1	terraristikTemporal	2010-09-08	2010
Hyloxalus azureiventris	499	Hyloxalus azureiventris	1	terraristikTemporal	2010-09-08	2010
Litoria caerulea	499	Litoria caerulea	1	terraristikTemporal	2010-09-08	2010
Pleurodeles waltl	502	Pleurodeles waltl	1	terraristikTemporal	2009-11-02	2009
Tylototriton kweichowensis	502	Tylototriton kweichowensis	1	terraristikTemporal	2009-11-02	2009
Tylototriton verrucosus	502	Tylototriton verrucosus	1	terraristikTemporal	2009-11-02	2009
Epipedobates anthonyi	503	Epipedobates anthonyi	1	terraristikTemporal	2010-09-08	2010
Dendrobates tinctorius	503	Dendrobates tinctorius	1	terraristikTemporal	2010-09-08	2010
Oophaga pumilio	503	Dendrobates pumilio	1	terraristikTemporal	2010-09-08	2010
Ceratophrys cornuta	505	Ceratophrys cornuta	1	terraristikTemporal	2009-02-12	2009
Litoria caerulea	505	Litoria caerulea	1	terraristikTemporal	2009-02-12	2009
Cynops orientalis	505	Cynops orientalis	1	terraristikTemporal	2009-02-12	2009
Lepidobatrachus laevis	506	Lepidobatrachus laevis	1	terraristikTemporal	2009-11-02	2009
Dendrobates leucomelas	506	Dendrobates leucomelas	1	terraristikTemporal	2009-11-02	2009
Trachycephalus resinifictrix	506	Trachycephalus resinifictrix	1	terraristikTemporal	2009-11-02	2009
Phlyctimantis maculatus	506	Kassina maculata	1	terraristikTemporal	2009-11-02	2009
Phyllomedusa bicolor	507	Phyllomedusa bicolor	1	terraristikTemporal	2010-09-08	2010
Pelobatrachus nasuta	507	Megophrys nasuta	1	terraristikTemporal	2010-09-08	2010
Nyctixalus pictus	507	Nyctixalus pictus	1	terraristikTemporal	2010-09-08	2010
Theloderma asperum	507	Theloderma asperum	1	terraristikTemporal	2010-09-08	2010
Alytes obstetricans	508	Alytes obstetricans	1	terraristikTemporal	2011-09-09	2011
Bufotes viridis	508	Bufo viridis	1	terraristikTemporal	2011-09-09	2011
Epidalea calamita	508	Bufo calamita	1	terraristikTemporal	2011-09-09	2011
Rentapia hosii	509	Pedostibes hosii	1	terraristikTemporal	2009-02-08	2009
Dendrobates leucomelas	510	Dendrobates leucomelas	1	terraristikTemporal	2009-11-05	2009
Trachycephalus resinifictrix	510	Trachycephalus resinifictrix	1	terraristikTemporal	2009-11-05	2009
Phlyctimantis maculatus	510	Kassina maculata	1	terraristikTemporal	2009-11-05	2009
Cynops orientalis	512	Cynops orientalis	1	terraristikTemporal	2011-09-09	2011
Dendrobates tinctorius	513	Dendrobates tinctorius	1	terraristikTemporal	2009-11-02	2009
Excidobates mysteriosus	513	Dendrobates mysteriosus	1	terraristikTemporal	2009-11-02	2009
Oophaga pumilio	513	Dendrobates pumilio	1	terraristikTemporal	2009-11-02	2009
Dendrobates tinctorius	517	Dendrobates tinctorius	1	terraristikTemporal	2009-11-05	2009
Excidobates mysteriosus	517	Dendrobates mysteriosus	1	terraristikTemporal	2009-11-05	2009
Oophaga pumilio	517	Dendrobates pumilio	1	terraristikTemporal	2009-11-05	2009
Microhyla ornata	520	Microhyla ornata	1	terraristikTemporal	2009-02-13	2009
Epipedobates anthonyi	521	Epipedobates anthonyi	1	terraristikTemporal	2009-11-02	2009
Dendrobates auratus	521	Dendrobates auratus	1	terraristikTemporal	2009-11-02	2009
Pyxicephalus edulis	521	Pyxicephalus edulis	1	terraristikTemporal	2009-11-02	2009
Cynops orientalis	521	Cynops orientalis	1	terraristikTemporal	2009-11-02	2009
Salamandra salamandra	521	Salamandra salamandra	1	terraristikTemporal	2009-11-02	2009
Oophaga pumilio	524	Oophaga pumilio	1	terraristikTemporal	2009-02-12	2009
Incilius alvarius	528	Bufo alvarius	1	terraristikTemporal	2009-02-07	2009
Litoria infrafrenata	529	Litoria infrafrenata	1	terraristikTemporal	2009-11-02	2009
Dendrobates leucomelas	530	Dendrobates leucomelas	1	terraristikTemporal	2010-09-08	2010
Necturus beyeri	530	Necturus beyeri	1	terraristikTemporal	2010-09-08	2010
Rentapia hosii	532	Pedostibes hosii	1	terraristikTemporal	2009-02-08	2009
Oophaga pumilio	532	Dendrobates pumilio	1	terraristikTemporal	2009-02-08	2009
Dendrobates tinctorius	533	Dendrobates tinctorius	1	terraristikTemporal	2009-11-02	2009
Oophaga pumilio	533	Oophaga pumilio	1	terraristikTemporal	2009-11-02	2009
Theloderma stellatum	535	Theloderma stellatum	1	terraristikTemporal	2011-09-09	2011
Ceratophrys cranwelli	537	Ceratophrys cranwelli	1	terraristikTemporal	2009-11-02	2009
Ceratophrys ornata	537	Ceratophrys ornata	1	terraristikTemporal	2009-11-02	2009
Dyscophus guineti	538	Dyscophus guineti	1	terraristikTemporal	2010-09-08	2010
Agalychnis moreletii	540	Agalychnis moreletii	1	terraristikTemporal	2009-11-03	2009
Adelphobates galactonotus	541	Dendrobates galactonotus	1	terraristikTemporal	2010-09-08	2010
Dendrobates tinctorius	541	Dendrobates tinctorius	1	terraristikTemporal	2010-09-08	2010
Phyllobates vittatus	541	Phyllobates vittatus	1	terraristikTemporal	2010-09-08	2010
Ceratophrys cranwelli	543	Ceratophrys cranwelli	1	terraristikTemporal	2009-02-08	2009
Ichthyosaura alpestris	543	Triturus alpestris	1	terraristikTemporal	2009-02-08	2009
Hyla cinerea	544	Hyla cinerea	1	terraristikTemporal	2009-11-03	2009
Litoria caerulea	544	Litoria caerulea	1	terraristikTemporal	2009-11-03	2009
Pulchrana signata	544	Rana signata	1	terraristikTemporal	2009-11-03	2009
Rana pipiens	544	Rana pipiens	1	terraristikTemporal	2009-11-03	2009
Ambystoma maculatum	544	Ambystoma maculatum	1	terraristikTemporal	2009-11-03	2009
Herpele squalostoma	544	Herpele squalostoma	1	terraristikTemporal	2009-11-03	2009
Dyscophus guineti	545	Dyscophus guineti	1	terraristikTemporal	2010-09-08	2010
Incilius alvarius	548	Bufo alvarius	1	terraristikTemporal	2009-11-02	2009
Lepidobatrachus laevis	548	Lepidobatrachus laevis	1	terraristikTemporal	2009-11-02	2009
Dendropsophus marmoratus	548	Hyla marmorata	1	terraristikTemporal	2009-11-02	2009
Amphiuma means	548	Amphiuma means	1	terraristikTemporal	2009-11-02	2009
Necturus beyeri	548	Necturus beyeri	1	terraristikTemporal	2009-11-02	2009
Pseudobranchus striatus	548	Pseudobranchus striatus	1	terraristikTemporal	2009-11-02	2009
Siren lacertina	548	Siren lacertina	1	terraristikTemporal	2009-11-02	2009
Dendrobates auratus	549	Dendrobates auratus	1	terraristikTemporal	2010-09-08	2010
Ranitomeya vanzolinii	549	Ranitomeya vanzolinii	1	terraristikTemporal	2010-09-08	2010
Alytes obstetricans	550	Alytes obstetricans	1	terraristikTemporal	2011-09-09	2011
Bufotes viridis	550	Bufo viridis	1	terraristikTemporal	2011-09-09	2011
Epidalea calamita	550	Bufo calamita	1	terraristikTemporal	2011-09-09	2011
Dendrobates tinctorius	550	Dendrobates tinctorius	1	terraristikTemporal	2011-09-09	2011
Phyllomedusa sauvagii	550	Phyllomedusa sauvagii	1	terraristikTemporal	2011-09-09	2011
Neurergus derjugini	550	Neurergus derjugini	1	terraristikTemporal	2011-09-09	2011
Theloderma corticale	551	Theloderma corticale	1	terraristikTemporal	2009-02-12	2009
Dendrobates leucomelas	552	Dendrobates leucomelas	1	terraristikTemporal	2009-11-02	2009
Agalychnis callidryas	555	Agalychnis callidryas	1	terraristikTemporal	2006-05-23	2006
Ichthyophis kohtaoensis	555	Ichthyophis kohtaoensis	1	terraristikTemporal	2006-05-23	2006
Trachycephalus resinifictrix	557	Trachycephalus resinifictrix	1	terraristikTemporal	2007-02-18	2007
Ranitomeya ventrimaculata	558	Ranitomeya ventrimaculata	2	terraristikTemporal	2007-08-14	2007
Cynops orientalis	558	Cynops orientalis	1	terraristikTemporal	2007-08-14	2007
Phyllobates vittatus	559	Phyllobates vittatus	1	terraristikTemporal	2005-07-06	2005
Mertensiella caucasica	559	Mertensiella caucasica	1	terraristikTemporal	2005-07-06	2005
Litoria infrafrenata	570	Litoria infrafrenata	1	terraristikTemporal	2005-11-10	2005
Ambystoma tigrinum	570	Ambystoma tigrinum	1	terraristikTemporal	2005-11-10	2005
Triturus karelinii	571	Triturus karelinii	1	terraristikTemporal	2006-05-14	2006
Triturus marmoratus	571	Triturus marmoratus	1	terraristikTemporal	2006-05-14	2006
Dendrobates tinctorius	573	Dendrobates azureus	1	terraristikTemporal	2006-07-26	2006
Liua shihi	573	Ranodon shihi	1	terraristikTemporal	2006-07-26	2006
Pachyhynobius shangchengensis	573	Pachyhynobius shangchengensis	1	terraristikTemporal	2006-07-26	2006
Cynops orphicus	573	Cynops orphicus	1	terraristikTemporal	2006-07-26	2006
Paramesotriton caudopunctatus	573	Paramesotriton caudopunctatus	1	terraristikTemporal	2006-07-26	2006
Paramesotriton labiatus	573	Pachytriton labiatus	1	terraristikTemporal	2006-07-26	2006
Dendrobates tinctorius	575	Dendrobates azureus	1	terraristikTemporal	2006-09-15	2006
Phyllobates terribilis	576	Phyllobates terribilis	1	terraristikTemporal	2007-01-01	2007
Trachycephalus resinifictrix	578	Trachycephalus resinifictrix	2	terraristikTemporal	2007-08-14	2007
Bombina maxima	579	Bombina maxima	1	terraristikTemporal	2005-07-06	2005
Bombina orientalis	579	Bombina orientalis	1	terraristikTemporal	2005-07-06	2005
Litoria caerulea	579	Litoria caerulea	1	terraristikTemporal	2005-07-06	2005
Ichthyosaura alpestris	581	Triturus alpestris	1	terraristikTemporal	2006-05-14	2006
Neurergus kaiseri	581	Neurergus kaiseri	1	terraristikTemporal	2006-05-14	2006
Bufo gargarizans	583	Bufo gargarizans	1	terraristikTemporal	2006-07-11	2006
Adelphobates galactonotus	585	Dendrobates galactonotus	1	terraristikTemporal	2006-09-09	2006
Dendrobates tinctorius	585	Dendrobates tinctorius	1	terraristikTemporal	2006-09-09	2006
Mantella aurantiaca	587	Mantella aurantiaca	1	terraristikTemporal	2007-02-10	2007
Mantella pulchra	587	Mantella pulchra	1	terraristikTemporal	2007-02-10	2007
Ranitomeya ventrimaculata	588	Ranitomeya ventrimaculata	1	terraristikTemporal	2007-08-13	2007
Ranitomeya ventrimaculata	589	Ranitomeya ventrimaculata	1	terraristikTemporal	2007-08-13	2007
Dendrobates tinctorius	593	Dendrobates tinctorius	1	terraristikTemporal	2006-07-11	2006
Cynops cyanurus	593	Cynops cyanurus	1	terraristikTemporal	2006-07-11	2006
Paramesotriton chinensis	593	Paramesotriton chinensis	1	terraristikTemporal	2006-07-11	2006
Paramesotriton labiatus	593	Pachytriton labiatus	1	terraristikTemporal	2006-07-11	2006
Pyxicephalus edulis	598	Pyxicephalus edulis	1	terraristikTemporal	2007-08-13	2007
Triturus marmoratus	598	Triturus marmoratus	1	terraristikTemporal	2007-08-13	2007
Pyxicephalus edulis	599	Pyxicephalus edulis	1	terraristikTemporal	2007-08-13	2007
Triturus marmoratus	599	Triturus marmoratus	1	terraristikTemporal	2007-08-13	2007
Dendrobates auratus	600	Dendrobates auratus	1	terraristikTemporal	2005-07-06	2005
Ranitomeya reticulata	600	Dendrobates reticulatus	1	terraristikTemporal	2005-07-06	2005
Pseudhymenochirus merlini	600	Pseudhymenochirus merlini	1	terraristikTemporal	2005-07-06	2005
Oophaga granulifera	601	Dendrobates granuliferus	1	terraristikTemporal	2005-11-10	2005
Oophaga pumilio	601	Dendrobates pumilio	1	terraristikTemporal	2005-11-10	2005
Salamandra algira	607	Salamandra algira	1	terraristikTemporal	2006-09-17	2006
Salamandra salamandra	607	Salamandra salamandra	1	terraristikTemporal	2006-09-17	2006
Agalychnis callidryas	608	Agalychnis callidryas	1	terraristikTemporal	2006-12-30	2006
Dendrobates auratus	612	Dendrobates auratus	1	terraristikTemporal	2005-11-10	2005
Dendrobates auratus	613	Dendrobates auratus	1	terraristikTemporal	2005-11-10	2005
Agalychnis callidryas	614	Agalychnis callidryas	1	terraristikTemporal	2006-05-14	2006
Cynops cyanurus	614	Cynops cyanurus	1	terraristikTemporal	2006-05-14	2006
Paramesotriton chinensis	614	Paramesotriton chinensis	1	terraristikTemporal	2006-05-14	2006
Paramesotriton labiatus	614	Pachytriton labiatus	1	terraristikTemporal	2006-05-14	2006
Agalychnis callidryas	615	Agalychnis callidryas	1	terraristikTemporal	2006-05-14	2006
Cynops cyanurus	615	Cynops cyanurus	1	terraristikTemporal	2006-05-14	2006
Paramesotriton chinensis	615	Paramesotriton chinensis	1	terraristikTemporal	2006-05-14	2006
Paramesotriton labiatus	615	Pachytriton labiatus	1	terraristikTemporal	2006-05-14	2006
Bombina orientalis	620	Bombina orientalis	1	terraristikTemporal	2007-02-10	2007
Litoria aurea	620	Litoria aurea	1	terraristikTemporal	2007-02-10	2007
Phlyctimantis maculatus	620	Kassina maculata	1	terraristikTemporal	2007-02-10	2007
Cynops orientalis	620	Cynops orientalis	1	terraristikTemporal	2007-02-10	2007
Bombina orientalis	621	Bombina orientalis	1	terraristikTemporal	2007-02-10	2007
Litoria aurea	621	Litoria aurea	1	terraristikTemporal	2007-02-10	2007
Phlyctimantis maculatus	621	Kassina maculata	1	terraristikTemporal	2007-02-10	2007
Cynops orientalis	621	Cynops orientalis	1	terraristikTemporal	2007-02-10	2007
Phyllobates bicolor	624	Phyllobates bicolor	1	terraristikTemporal	2005-07-06	2005
Phyllomedusa bicolor	624	Phyllomedusa bicolor	1	terraristikTemporal	2005-07-06	2005
Dendrobates tinctorius	627	Dendrobates azureus	1	terraristikTemporal	2006-07-11	2006
Rhinella schneideri	632	Bufo paracnemis	1	terraristikTemporal	2007-08-13	2007
Rhinella schneideri	633	Bufo paracnemis	1	terraristikTemporal	2007-08-14	2007
Mertensiella caucasica	634	Mertensiella caucasica	1	terraristikTemporal	2005-07-06	2005
Hyla cinerea	636	Hyla cinerea	1	terraristikTemporal	2006-05-14	2006
Agalychnis callidryas	636	Agalychnis callidryas	1	terraristikTemporal	2006-05-14	2006
Dendrobates tinctorius	639	Dendrobates azureus	1	terraristikTemporal	2006-09-18	2006
Leptopelis vermiculatus	641	Leptopelis vermiculatus	1	terraristikTemporal	2007-02-10	2007
Neurergus kaiseri	641	Neurergus kaiseri	1	terraristikTemporal	2007-02-10	2007
Dendrobates auratus	645	Dendrobates auratus	1	terraristikTemporal	2006-05-14	2006
Dendrobates tinctorius	646	Dendrobates tinctorius	1	terraristikTemporal	2006-07-11	2006
Dendrobates tinctorius	650	Dendrobates tinctorius	1	terraristikTemporal	2007-02-10	2007
Dendrobates tinctorius	653	Dendrobates azureus	1	terraristikTemporal	2005-07-06	2005
Phyllomedusa tarsius	653	Phyllomedusa tarsius	1	terraristikTemporal	2005-07-06	2005
Salamandra salamandra	653	Salamandra salamandra	1	terraristikTemporal	2005-07-06	2005
Bombina orientalis	655	Bombina orientalis	1	terraristikTemporal	2006-05-14	2006
Dendrobates auratus	655	Dendrobates auratus	1	terraristikTemporal	2006-05-14	2006
Oophaga pumilio	655	Dendrobates pumilio	1	terraristikTemporal	2006-05-14	2006
Agalychnis callidryas	655	Agalychnis callidryas	1	terraristikTemporal	2006-05-14	2006
Epipedobates tricolor	656	Epipedobates tricolor	1	terraristikTemporal	2006-07-11	2006
Dendropsophus leucophyllatus	657	Hyla leucophyllata	1	terraristikTemporal	2006-07-26	2006
Phyllobates vittatus	658	Phyllobates vittatus	1	terraristikTemporal	2006-09-19	2006
Triturus marmoratus	658	Triturus marmoratus	1	terraristikTemporal	2006-09-19	2006
Lissotriton vulgaris	660	Triturus vulgaris	1	terraristikTemporal	2007-08-13	2007
Dendrobates auratus	661	Dendrobates auratus	1	terraristikTemporal	2007-08-14	2007
Salamandra salamandra	662	Salamandra salamandra	1	terraristikTemporal	2005-07-06	2005
Dendrobates auratus	664	Dendrobates auratus	1	terraristikTemporal	2006-05-14	2006
Dendropsophus leucophyllatus	666	Hyla leucophyllata	1	terraristikTemporal	2006-07-27	2006
Ranitomeya amazonica	667	Dendrobates amazonicus	1	terraristikTemporal	2006-09-10	2006
Epipedobates tricolor	670	Epipedobates tricolor	1	terraristikTemporal	2007-02-10	2007
Lissotriton vulgaris	671	Triturus vulgaris	1	terraristikTemporal	2007-08-14	2007
Lissotriton vulgaris	672	Triturus vulgaris	1	terraristikTemporal	2007-08-14	2007
Ichthyophis kohtaoensis	674	Ichthyophis kohtaoensis	1	terraristikTemporal	2005-11-10	2005
Ceratophrys cranwelli	675	Ceratophrys cranwelli	1	terraristikTemporal	2006-05-14	2006
Cynops pyrrhogaster	675	Cynops pyrrhogaster	1	terraristikTemporal	2006-05-14	2006
Dendrobates tinctorius	677	Dendrobates tinctorius	2	terraristikTemporal	2006-07-27	2006
Ranitomeya variabilis	677	Dendrobates variabilis	1	terraristikTemporal	2006-07-27	2006
Dendrobates tinctorius	678	Dendrobates tinctorius	1	terraristikTemporal	2006-09-10	2006
Triturus carnifex	678	Triturus carnifex	1	terraristikTemporal	2006-09-10	2006
Dendrobates tinctorius	680	Dendrobates tinctorius	1	terraristikTemporal	2007-08-14	2007
Dendrobates tinctorius	681	Dendrobates tinctorius	1	terraristikTemporal	2007-08-14	2007
Litoria aurea	681	Litoria aurea	1	terraristikTemporal	2007-08-14	2007
Hyperolius puncticulatus	681	Hyperolius puncticulatus	1	terraristikTemporal	2007-08-14	2007
Hyperolius thomensis	681	Nesionixalus thomensis	1	terraristikTemporal	2007-08-14	2007
Polypedates leucomystax	681	Polypedates leucomystax	1	terraristikTemporal	2007-08-14	2007
Polypedates teraiensis	681	Polypedates leucomystax	1	terraristikTemporal	2007-08-14	2007
Zhangixalus prominanus	681	Rhacophorus prominanus	1	terraristikTemporal	2007-08-14	2007
Dendrobates tinctorius	682	Dendrobates azureus	1	terraristikTemporal	2005-07-06	2005
Trachycephalus resinifictrix	687	Phrynohyas resinifictrix	1	terraristikTemporal	2006-12-30	2006
Trachycephalus resinifictrix	688	Phrynohyas resinifictrix	1	terraristikTemporal	2007-01-01	2007
Trachycephalus resinifictrix	691	Trachycephalus resinifictrix	1	terraristikTemporal	2007-08-14	2007
Ranitomeya reticulata	696	Dendrobates reticulatus	1	terraristikTemporal	2006-07-26	2006
Theloderma corticale	697	Theloderma corticale	1	terraristikTemporal	2006-09-10	2006
Ceratophrys cranwelli	698	Ceratophrys cranwelli	1	terraristikTemporal	2007-02-10	2007
Ambystoma mexicanum	698	Ambystoma mexicanum	1	terraristikTemporal	2007-02-10	2007
Dendropsophus ebraccatus	700	Hyla ebraccata	1	terraristikTemporal	2005-07-06	2005
Litoria infrafrenata	702	Litoria infrafrenata	1	terraristikTemporal	2006-05-14	2006
Dendrobates auratus	703	Dendrobates auratus	1	terraristikTemporal	2006-07-11	2006
Pleurodeles waltl	705	Pleurodeles waltl	1	terraristikTemporal	2006-09-09	2006
Litoria caerulea	710	Litoria caerulea	1	terraristikTemporal	2005-07-06	2005
Mertensiella caucasica	711	Mertensiella caucasica	1	terraristikTemporal	2005-11-10	2005
Dendrobates auratus	713	Dendrobates auratus	1	terraristikTemporal	2006-07-11	2006
Oophaga pumilio	713	Dendrobates pumilio	1	terraristikTemporal	2006-07-11	2006
Agalychnis callidryas	713	Agalychnis callidryas	1	terraristikTemporal	2006-07-11	2006
Ranitomeya reticulata	714	Dendrobates reticulatus	1	terraristikTemporal	2006-07-26	2006
Trachycephalus resinifictrix	716	Phrynohyas resinifictrix	1	terraristikTemporal	2007-02-10	2007
Mantella aurantiaca	721	Mantella aurantiaca	1	terraristikTemporal	2006-07-11	2006
Phyllobates terribilis	724	Phyllobates terribilis	1	terraristikTemporal	2006-12-30	2006
Dendrobates leucomelas	725	Dendrobates leucomelas	1	terraristikTemporal	2007-02-10	2007
Dendrobates tinctorius	725	Dendrobates tinctorius	1	terraristikTemporal	2007-02-10	2007
Ambystoma opacum	726	Ambystoma opacum	1	terraristikTemporal	2007-08-14	2007
Oophaga granulifera	729	Dendrobates granuliferus	1	terraristikTemporal	2006-05-14	2006
Oophaga pumilio	729	Dendrobates pumilio	1	terraristikTemporal	2006-05-14	2006
Dendrobates auratus	730	Dendrobates auratus	1	terraristikTemporal	2006-07-11	2006
Dendrobates tinctorius	731	Dendrobates tinctorius	1	terraristikTemporal	2006-07-27	2006
Mantella aurantiaca	733	Mantella aurantiaca	1	terraristikTemporal	2007-02-10	2007
Alytes obstetricans	734	Alytes obstetricans	1	terraristikTemporal	2007-08-13	2007
Dendrobates auratus	734	Dendrobates auratus	1	terraristikTemporal	2007-08-13	2007
Dendrobates tinctorius	734	Dendrobates tinctorius	2	terraristikTemporal	2007-08-13	2007
Triturus dobrogicus	734	Triturus dobrogicus	1	terraristikTemporal	2007-08-13	2007
Rhinella schneideri	742	Bufo paracnemis	1	terraristikTemporal	2005-07-06	2005
Ranitomeya imitator	742	Dendrobates imitator	1	terraristikTemporal	2005-07-06	2005
Hyla meridionalis	742	Hyla meridionalis	1	terraristikTemporal	2005-07-06	2005
Epipedobates tricolor	744	Epipedobates tricolor	1	terraristikTemporal	2006-07-11	2006
Ranitomeya amazonica	744	Dendrobates amazonicus	1	terraristikTemporal	2006-07-11	2006
Cynops cyanurus	748	Cynops cyanurus	1	terraristikTemporal	2007-02-10	2007
Pachytriton brevipes	748	Pachytriton brevipes	1	terraristikTemporal	2007-02-10	2007
Alytes obstetricans	750	Alytes obstetricans	1	terraristikTemporal	2007-08-14	2007
Triturus dobrogicus	750	Triturus dobrogicus	1	terraristikTemporal	2007-08-14	2007
Dendrobates auratus	751	Dendrobates auratus	1	terraristikTemporal	2005-07-06	2005
Dendrobates tinctorius	751	Dendrobates tinctorius	1	terraristikTemporal	2005-07-06	2005
Trachycephalus resinifictrix	751	Phrynohyas resinifictrix	1	terraristikTemporal	2005-07-06	2005
Trachycephalus resinifictrix	752	Phrynohyas resinifictrix	1	terraristikTemporal	2006-05-14	2006
Pelobatrachus nasuta	752	Megophrys nasuta	1	terraristikTemporal	2006-05-14	2006
Litoria infrafrenata	753	Litoria infrafrenata	1	terraristikTemporal	2006-07-11	2006
Phyllomedusa vaillantii	755	Phyllomedusa vaillantii	1	terraristikTemporal	2006-09-08	2006
Triturus marmoratus	756	Triturus marmoratus	1	terraristikTemporal	2007-02-10	2007
Echinotriton andersoni	757	Echinotriton andersoni	1	terraristikTemporal	2007-08-13	2007
Tylototriton asperrimus	757	Tylototriton asperrimus	1	terraristikTemporal	2007-08-13	2007
Tylototriton kweichowensis	757	Tylototriton kweichowensis	1	terraristikTemporal	2007-08-13	2007
Bufo bufo	761	Bufo bufo	1	terraristikTemporal	2006-07-11	2006
Agalychnis callidryas	762	Agalychnis callidryas	1	terraristikTemporal	2006-07-27	2006
Dendrobates tinctorius	765	Dendrobates tinctorius	1	terraristikTemporal	2007-02-10	2007
Ichthyophis kohtaoensis	769	Ichthyophis kohtaoensis	1	terraristikTemporal	2006-05-14	2006
Rhaebo guttatus	770	Bufo guttatus	1	terraristikTemporal	2006-07-11	2006
Rhinella marina	770	Bufo marinus	1	terraristikTemporal	2006-07-11	2006
Rhinella schneideri	770	Bufo paracnemis	1	terraristikTemporal	2006-07-11	2006
Triturus karelinii	771	Triturus karelinii	1	terraristikTemporal	2006-07-26	2006
Trachycephalus resinifictrix	772	Phrynohyas resinifictrix	1	terraristikTemporal	2006-09-08	2006
Mantella expectata	773	Mantella expectata	1	terraristikTemporal	2006-09-08	2006
Ambystoma tigrinum	774	Ambystoma tigrinum	1	terraristikTemporal	2007-01-01	2007
Dendrobates leucomelas	775	Dendrobates leucomelas	1	terraristikTemporal	2007-02-10	2007
Dendrobates tinctorius	775	Dendrobates tinctorius	1	terraristikTemporal	2007-02-10	2007
Oophaga pumilio	778	Dendrobates pumilio	1	terraristikTemporal	2005-07-06	2005
Oophaga granulifera	780	Dendrobates granuliferus	1	terraristikTemporal	2006-07-11	2006
Oophaga pumilio	780	Dendrobates pumilio	1	terraristikTemporal	2006-07-11	2006
Bombina variegata	784	Bombina variegata	1	terraristikTemporal	2007-02-10	2007
Bombina orientalis	788	Bombina orientalis	1	terraristikTemporal	2006-05-14	2006
Pipa parva	788	Pipa parva	1	terraristikTemporal	2006-05-14	2006
Epipedobates tricolor	795	Epipedobates tricolor	1	terraristikTemporal	2007-08-14	2007
Epipedobates tricolor	796	Epipedobates tricolor	1	terraristikTemporal	2007-08-14	2007
Salamandra salamandra	797	Salamandra salamandra	1	terraristikTemporal	2005-07-06	2005
Oophaga pumilio	799	Dendrobates pumilio	1	terraristikTemporal	2006-07-11	2006
Phyllobates vittatus	800	Phyllobates vittatus	1	terraristikTemporal	2006-07-27	2006
Amphiuma means	801	Amphiuma means	1	terraristikTemporal	2007-01-01	2007
Cryptobranchus alleganiensis	801	Cryptobranchus alleganiensis	1	terraristikTemporal	2007-01-01	2007
Necturus maculosus	801	Necturus maculosus	1	terraristikTemporal	2007-01-01	2007
Siren lacertina	801	Siren lacertina	1	terraristikTemporal	2007-01-01	2007
Ranitomeya variabilis	802	Dendrobates variabilis	1	terraristikTemporal	2007-02-10	2007
Epipedobates tricolor	804	Epipedobates tricolor	1	terraristikTemporal	2007-08-14	2007
Dendrobates tinctorius	805	Dendrobates azureus	1	terraristikTemporal	2005-07-06	2005
Dendrobates truncatus	812	Dendrobates truncatus	1	terraristikTemporal	2006-07-11	2006
Ranitomeya flavovittata	812	Dendrobates flavovittatus	1	terraristikTemporal	2006-07-11	2006
Agalychnis callidryas	812	Agalychnis callidryas	1	terraristikTemporal	2006-07-11	2006
Phlyctimantis maculatus	815	Kassina maculata	1	terraristikTemporal	2007-02-10	2007
Cynops pyrrhogaster	815	Cynops pyrrhogaster	1	terraristikTemporal	2007-02-10	2007
Microhyla heymonsi	819	Microhyla heymonsi	1	terraristikTemporal	2006-05-14	2006
Liua shihi	820	Ranodon shihi	1	terraristikTemporal	2006-07-11	2006
Pachyhynobius shangchengensis	820	Pachyhynobius shangchengensis	1	terraristikTemporal	2006-07-11	2006
Cynops orphicus	820	Cynops orphicus	1	terraristikTemporal	2006-07-11	2006
Paramesotriton caudopunctatus	820	Paramesotriton caudopunctatus	1	terraristikTemporal	2006-07-11	2006
Paramesotriton labiatus	820	Pachytriton labiatus	1	terraristikTemporal	2006-07-11	2006
Excidobates mysteriosus	823	Dendrobates mysteriosus	1	terraristikTemporal	2007-08-14	2007
Rhinella rubropunctata	824	Bufo rubropunctatus	1	terraristikTemporal	2005-11-10	2005
Ceratophrys aurita	824	Ceratophrys aurita	1	terraristikTemporal	2005-11-10	2005
Lepidobatrachus asper	824	Lepidobatrachus asper	1	terraristikTemporal	2005-11-10	2005
Epipedobates tricolor	824	Epipedobates tricolor	1	terraristikTemporal	2005-11-10	2005
Dendrobates auratus	824	Dendrobates auratus	1	terraristikTemporal	2005-11-10	2005
Ranitomeya variabilis	824	Dendrobates variabilis	1	terraristikTemporal	2005-11-10	2005
Tlalocohyla loquax	824	Hyla loquax	1	terraristikTemporal	2005-11-10	2005
Trachycephalus resinifictrix	824	Phrynohyas resinifictrix	1	terraristikTemporal	2005-11-10	2005
Agalychnis callidryas	824	Agalychnis callidryas	1	terraristikTemporal	2005-11-10	2005
Agalychnis moreletii	824	Agalychnis moreletii	1	terraristikTemporal	2005-11-10	2005
Phyllomedusa vaillantii	824	Phyllomedusa vaillantii	1	terraristikTemporal	2005-11-10	2005
Edalorhina perezi	824	Edalorhina perezi	1	terraristikTemporal	2005-11-10	2005
Pyxicephalus adspersus	824	Pyxicephalus adspersus	1	terraristikTemporal	2005-11-10	2005
Pyxicephalus edulis	824	Pyxicephalus edulis	1	terraristikTemporal	2005-11-10	2005
Triturus carnifex	824	Triturus carnifex	1	terraristikTemporal	2005-11-10	2005
Bombina orientalis	825	Bombina orientalis	1	terraristikTemporal	2005-11-10	2005
Epipedobates tricolor	825	Epipedobates tricolor	1	terraristikTemporal	2005-11-10	2005
Dendrobates auratus	825	Dendrobates auratus	1	terraristikTemporal	2005-11-10	2005
Dendrobates leucomelas	825	Dendrobates leucomelas	1	terraristikTemporal	2005-11-10	2005
Dendrobates tinctorius	825	Dendrobates azureus	1	terraristikTemporal	2005-11-10	2005
Hyla cinerea	825	Hyla cinerea	1	terraristikTemporal	2005-11-10	2005
Trachycephalus resinifictrix	825	Phrynohyas resinifictrix	1	terraristikTemporal	2005-11-10	2005
Agalychnis callidryas	825	Agalychnis callidryas	1	terraristikTemporal	2005-11-10	2005
Phyllomedusa bicolor	825	Phyllomedusa bicolor	1	terraristikTemporal	2005-11-10	2005
Phyllomedusa boliviana	825	Phyllomedusa boliviana	1	terraristikTemporal	2005-11-10	2005
Phyllomedusa sauvagii	825	Phyllomedusa sauvagii	1	terraristikTemporal	2005-11-10	2005
Phyllomedusa tarsius	825	Phyllomedusa tarsius	1	terraristikTemporal	2005-11-10	2005
Ambystoma mexicanum	825	Ambystoma mexicanum	1	terraristikTemporal	2005-11-10	2005
Triturus marmoratus	825	Triturus marmoratus	1	terraristikTemporal	2005-11-10	2005
Melanophryniscus stelzneri	826	Melanophryniscus stelzneri	1	terraristikTemporal	2005-11-10	2005
Rhinella rubropunctata	826	Bufo rubropunctatus	1	terraristikTemporal	2005-11-10	2005
Calyptocephalella gayi	826	Caudiverbera caudiverbera	1	terraristikTemporal	2005-11-10	2005
Ceratophrys cornuta	826	Ceratophrys cornuta	1	terraristikTemporal	2005-11-10	2005
Dendrobates auratus	826	Dendrobates auratus	1	terraristikTemporal	2005-11-10	2005
Phyllobates vittatus	826	Phyllobates vittatus	1	terraristikTemporal	2005-11-10	2005
Ranitomeya variabilis	826	Dendrobates variabilis	1	terraristikTemporal	2005-11-10	2005
Occidozyga laevis	826	Occidozyga laevis	1	terraristikTemporal	2005-11-10	2005
Agalychnis callidryas	826	Agalychnis callidryas	1	terraristikTemporal	2005-11-10	2005
Phyllomedusa sauvagii	826	Phyllomedusa sauvagii	1	terraristikTemporal	2005-11-10	2005
Pipa pipa	826	Pipa pipa	1	terraristikTemporal	2005-11-10	2005
Cynops ensicauda	826	Cynops ensicauda	1	terraristikTemporal	2005-11-10	2005
Salamandra algira	826	Salamandra algira	1	terraristikTemporal	2005-11-10	2005
Rhinella rubropunctata	827	Bufo rubropunctatus	1	terraristikTemporal	2005-11-10	2005
Calyptocephalella gayi	827	Caudiverbera caudiverbera	1	terraristikTemporal	2005-11-10	2005
Ceratophrys cornuta	827	Ceratophrys cornuta	1	terraristikTemporal	2005-11-10	2005
Ameerega trivittata	827	Epipedobates trivittatus	1	terraristikTemporal	2005-11-10	2005
Epipedobates tricolor	827	Epipedobates tricolor	1	terraristikTemporal	2005-11-10	2005
Dendrobates tinctorius	827	Dendrobates azureus	1	terraristikTemporal	2005-11-10	2005
Ranitomeya fantastica	827	Dendrobates fantasticus	1	terraristikTemporal	2005-11-10	2005
Ranitomeya ventrimaculata	827	Dendrobates ventrimaculatus	1	terraristikTemporal	2005-11-10	2005
Occidozyga laevis	827	Occidozyga laevis	1	terraristikTemporal	2005-11-10	2005
Dendropsophus ebraccatus	827	Hyla ebraccata	1	terraristikTemporal	2005-11-10	2005
Phyllomedusa boliviana	827	Phyllomedusa boliviana	1	terraristikTemporal	2005-11-10	2005
Phyllomedusa sauvagii	827	Phyllomedusa sauvagii	1	terraristikTemporal	2005-11-10	2005
Phyllomedusa tarsius	827	Phyllomedusa tarsius	1	terraristikTemporal	2005-11-10	2005
Phyllomedusa tomopterna	827	Phyllomedusa tomopterna	1	terraristikTemporal	2005-11-10	2005
Mantella aurantiaca	827	Mantella aurantiaca	1	terraristikTemporal	2005-11-10	2005
Dyscophus guineti	827	Dyscophus guineti	1	terraristikTemporal	2005-11-10	2005
Pipa pipa	827	Pipa pipa	1	terraristikTemporal	2005-11-10	2005
Ichthyosaura alpestris	827	Triturus alpestris	1	terraristikTemporal	2005-11-10	2005
Pleurodeles waltl	827	Pleurodeles waltl	1	terraristikTemporal	2005-11-10	2005
Salamandra salamandra	827	Salamandra salamandra	1	terraristikTemporal	2005-11-10	2005
Bombina variegata	828	Bombina variegata	1	terraristikTemporal	2005-11-10	2005
Rhinella rubropunctata	828	Bufo rubropunctatus	1	terraristikTemporal	2005-11-10	2005
Calyptocephalella gayi	828	Caudiverbera caudiverbera	1	terraristikTemporal	2005-11-10	2005
Ceratophrys cornuta	828	Ceratophrys cornuta	1	terraristikTemporal	2005-11-10	2005
Epipedobates tricolor	828	Epipedobates tricolor	1	terraristikTemporal	2005-11-10	2005
Ranitomeya fantastica	828	Dendrobates fantasticus	1	terraristikTemporal	2005-11-10	2005
Occidozyga laevis	828	Occidozyga laevis	1	terraristikTemporal	2005-11-10	2005
Hyla arborea	828	Hyla arborea	1	terraristikTemporal	2005-11-10	2005
Litoria caerulea	828	Litoria caerulea	1	terraristikTemporal	2005-11-10	2005
Hyperolius puncticulatus	828	Hyperolius puncticulatus	1	terraristikTemporal	2005-11-10	2005
Kaloula pulchra	828	Kaloula pulchra	1	terraristikTemporal	2005-11-10	2005
Pipa pipa	828	Pipa pipa	1	terraristikTemporal	2005-11-10	2005
Bombina orientalis	829	Bombina orientalis	1	terraristikTemporal	2005-11-10	2005
Rhinella schneideri	829	Bufo paracnemis	1	terraristikTemporal	2005-11-10	2005
Ceratophrys cranwelli	829	Ceratophrys cranwelli	1	terraristikTemporal	2005-11-10	2005
Dendrobates tinctorius	829	Dendrobates tinctorius	2	terraristikTemporal	2005-11-10	2005
Oophaga pumilio	829	Dendrobates pumilio	1	terraristikTemporal	2005-11-10	2005
Phyllobates bicolor	829	Phyllobates bicolor	1	terraristikTemporal	2005-11-10	2005
Ranitomeya imitator	829	Dendrobates imitator	1	terraristikTemporal	2005-11-10	2005
Ranitomeya variabilis	829	Dendrobates variabilis	1	terraristikTemporal	2005-11-10	2005
Litoria caerulea	829	Litoria caerulea	1	terraristikTemporal	2005-11-10	2005
Phyllomedusa bicolor	829	Phyllomedusa bicolor	1	terraristikTemporal	2005-11-10	2005
Phyllomedusa vaillantii	829	Phyllomedusa vaillantii	1	terraristikTemporal	2005-11-10	2005
Pseudhymenochirus merlini	829	Pseudhymenochirus merlini	1	terraristikTemporal	2005-11-10	2005
Ambystoma tigrinum	829	Ambystoma tigrinum	1	terraristikTemporal	2005-11-10	2005
Cynops cyanurus	829	Cynops cyanurus	1	terraristikTemporal	2005-11-10	2005
Mertensiella caucasica	829	Mertensiella caucasica	1	terraristikTemporal	2005-11-10	2005
Bombina orientalis	830	Bombina orientalis	1	terraristikTemporal	2005-11-10	2005
Rhinella schneideri	830	Bufo paracnemis	1	terraristikTemporal	2005-11-10	2005
Ceratophrys cranwelli	830	Ceratophrys cranwelli	1	terraristikTemporal	2005-11-10	2005
Dendrobates tinctorius	830	Dendrobates tinctorius	2	terraristikTemporal	2005-11-10	2005
Oophaga pumilio	830	Dendrobates pumilio	1	terraristikTemporal	2005-11-10	2005
Phyllobates bicolor	830	Phyllobates bicolor	1	terraristikTemporal	2005-11-10	2005
Ranitomeya imitator	830	Dendrobates imitator	1	terraristikTemporal	2005-11-10	2005
Ranitomeya variabilis	830	Dendrobates variabilis	1	terraristikTemporal	2005-11-10	2005
Litoria caerulea	830	Litoria caerulea	1	terraristikTemporal	2005-11-10	2005
Phyllomedusa bicolor	830	Phyllomedusa bicolor	1	terraristikTemporal	2005-11-10	2005
Phyllomedusa vaillantii	830	Phyllomedusa vaillantii	1	terraristikTemporal	2005-11-10	2005
Pseudhymenochirus merlini	830	Pseudhymenochirus merlini	1	terraristikTemporal	2005-11-10	2005
Ambystoma tigrinum	830	Ambystoma tigrinum	1	terraristikTemporal	2005-11-10	2005
Cynops cyanurus	830	Cynops cyanurus	1	terraristikTemporal	2005-11-10	2005
Mertensiella caucasica	830	Mertensiella caucasica	1	terraristikTemporal	2005-11-10	2005
Rhinella rubropunctata	831	Bufo rubropunctatus	1	terraristikTemporal	2005-11-10	2005
Calyptocephalella gayi	831	Caudiverbera caudiverbera	1	terraristikTemporal	2005-11-10	2005
Ceratophrys cornuta	831	Ceratophrys cornuta	1	terraristikTemporal	2005-11-10	2005
Epipedobates tricolor	831	Epipedobates tricolor	1	terraristikTemporal	2005-11-10	2005
Dendrobates leucomelas	831	Dendrobates leucomelas	1	terraristikTemporal	2005-11-10	2005
Dendrobates tinctorius	831	Dendrobates tinctorius	2	terraristikTemporal	2005-11-10	2005
Oophaga pumilio	831	Dendrobates pumilio	1	terraristikTemporal	2005-11-10	2005
Phyllobates vittatus	831	Phyllobates vittatus	1	terraristikTemporal	2005-11-10	2005
Ranitomeya reticulata	831	Dendrobates reticulatus	1	terraristikTemporal	2005-11-10	2005
Occidozyga laevis	831	Occidozyga laevis	1	terraristikTemporal	2005-11-10	2005
Pipa pipa	831	Pipa pipa	1	terraristikTemporal	2005-11-10	2005
Pyxicephalus adspersus	831	Pyxicephalus adspersus	1	terraristikTemporal	2005-11-10	2005
Ambystoma maculatum	831	Ambystoma maculatum	1	terraristikTemporal	2005-11-10	2005
Pleurodeles waltl	831	Pleurodeles waltl	1	terraristikTemporal	2005-11-10	2005
Oophaga pumilio	832	Dendrobates pumilio	1	terraristikTemporal	2005-11-10	2005
Phyllobates vittatus	832	Phyllobates vittatus	1	terraristikTemporal	2005-11-10	2005
Ranitomeya reticulata	832	Dendrobates reticulatus	1	terraristikTemporal	2005-11-10	2005
Ranitomeya variabilis	832	Dendrobates variabilis	1	terraristikTemporal	2005-11-10	2005
Hyla arborea	832	Hyla arborea	1	terraristikTemporal	2005-11-10	2005
Trachycephalus resinifictrix	832	Phrynohyas resinifictrix	1	terraristikTemporal	2005-11-10	2005
Ambystoma maculatum	832	Ambystoma maculatum	1	terraristikTemporal	2005-11-10	2005
Ambystoma tigrinum	832	Ambystoma tigrinum	1	terraristikTemporal	2005-11-10	2005
Cynops ensicauda	832	Cynops ensicauda	1	terraristikTemporal	2005-11-10	2005
Cynops pyrrhogaster	832	Cynops pyrrhogaster	1	terraristikTemporal	2005-11-10	2005
Lissotriton montandoni	832	Triturus montandoni	1	terraristikTemporal	2005-11-10	2005
Pleurodeles nebulosus	832	Pleurodeles nebulosus	1	terraristikTemporal	2005-11-10	2005
Mertensiella caucasica	832	Mertensiella caucasica	1	terraristikTemporal	2005-11-10	2005
Salamandra salamandra	832	Salamandra salamandra	1	terraristikTemporal	2005-11-10	2005
Rhinella rubropunctata	833	Bufo rubropunctatus	1	terraristikTemporal	2005-11-10	2005
Ceratophrys aurita	833	Ceratophrys aurita	1	terraristikTemporal	2005-11-10	2005
Ceratophrys cranwelli	833	Ceratophrys cranwelli	1	terraristikTemporal	2005-11-10	2005
Lepidobatrachus asper	833	Lepidobatrachus asper	1	terraristikTemporal	2005-11-10	2005
Epipedobates tricolor	833	Epipedobates tricolor	1	terraristikTemporal	2005-11-10	2005
Adelphobates galactonotus	833	Dendrobates galactonotus	1	terraristikTemporal	2005-11-10	2005
Dendrobates tinctorius	833	Dendrobates tinctorius	2	terraristikTemporal	2005-11-10	2005
Oophaga pumilio	833	Dendrobates pumilio	1	terraristikTemporal	2005-11-10	2005
Phyllobates terribilis	833	Phyllobates terribilis	1	terraristikTemporal	2005-11-10	2005
Phyllobates vittatus	833	Phyllobates vittatus	1	terraristikTemporal	2005-11-10	2005
Ranitomeya imitator	833	Dendrobates imitator	1	terraristikTemporal	2005-11-10	2005
Ranitomeya variabilis	833	Dendrobates variabilis	1	terraristikTemporal	2005-11-10	2005
Agalychnis callidryas	833	Agalychnis callidryas	1	terraristikTemporal	2005-11-10	2005
Heterixalus madagascariensis	833	Heterixalus madagascariensis	1	terraristikTemporal	2005-11-10	2005
Mantella madagascariensis	833	Mantella madagascariensis	1	terraristikTemporal	2005-11-10	2005
Mantella pulchra	833	Mantella pulchra	1	terraristikTemporal	2005-11-10	2005
Calotriton asper	833	Euproctus asper	1	terraristikTemporal	2005-11-10	2005
Ichthyosaura alpestris	833	Triturus alpestris	1	terraristikTemporal	2005-11-10	2005
Pleurodeles waltl	833	Pleurodeles waltl	1	terraristikTemporal	2005-11-10	2005
Salamandra salamandra	833	Salamandra salamandra	1	terraristikTemporal	2005-11-10	2005
Rhinella schneideri	834	Bufo paracnemis	1	terraristikTemporal	2005-11-10	2005
Ameerega macero	834	Epipedobates macero	1	terraristikTemporal	2005-11-10	2005
Adelphobates castaneoticus	834	Dendrobates castaneoticus	1	terraristikTemporal	2005-11-10	2005
Dendrobates auratus	834	Dendrobates auratus	1	terraristikTemporal	2005-11-10	2005
Dendrobates tinctorius	834	Dendrobates tinctorius	1	terraristikTemporal	2005-11-10	2005
Oophaga granulifera	834	Dendrobates granuliferus	1	terraristikTemporal	2005-11-10	2005
Oophaga pumilio	834	Dendrobates pumilio	1	terraristikTemporal	2005-11-10	2005
Phyllobates lugubris	834	Phyllobates lugubris	1	terraristikTemporal	2005-11-10	2005
Phyllobates terribilis	834	Phyllobates terribilis	1	terraristikTemporal	2005-11-10	2005
Phyllobates vittatus	834	Phyllobates vittatus	1	terraristikTemporal	2005-11-10	2005
Ranitomeya fantastica	834	Dendrobates fantasticus	1	terraristikTemporal	2005-11-10	2005
Ranitomeya imitator	834	Dendrobates imitator	1	terraristikTemporal	2005-11-10	2005
Ranitomeya reticulata	834	Dendrobates reticulatus	1	terraristikTemporal	2005-11-10	2005
Ranitomeya variabilis	834	Dendrobates variabilis	1	terraristikTemporal	2005-11-10	2005
Gastrotheca riobambae	834	Gastrotheca riobambae	1	terraristikTemporal	2005-11-10	2005
Trachycephalus resinifictrix	834	Phrynohyas resinifictrix	1	terraristikTemporal	2005-11-10	2005
Agalychnis callidryas	834	Agalychnis callidryas	1	terraristikTemporal	2005-11-10	2005
Scaphiophryne gottlebei	834	Scaphiophryne gottlebei	1	terraristikTemporal	2005-11-10	2005
Scaphiophryne obscura	834	Scaphiophryne	1	terraristikTemporal	2005-11-10	2005
Scaphiophryne verrucosa	834	Scaphiophryne	1	terraristikTemporal	2005-11-10	2005
Theloderma corticale	834	Theloderma corticale	1	terraristikTemporal	2005-11-10	2005
Necturus maculosus	834	Necturus maculosus	1	terraristikTemporal	2005-11-10	2005
Salamandra algira	834	Salamandra algira	1	terraristikTemporal	2005-11-10	2005
Bombina variegata	835	Bombina variegata	1	terraristikTemporal	2005-11-10	2005
Peltophryne peltocephala	835	Bufo peltocephalus	1	terraristikTemporal	2005-11-10	2005
Rhinella schneideri	835	Bufo paracnemis	1	terraristikTemporal	2005-11-10	2005
Dendrobates auratus	835	Dendrobates auratus	1	terraristikTemporal	2005-11-10	2005
Dendrobates leucomelas	835	Dendrobates leucomelas	1	terraristikTemporal	2005-11-10	2005
Dendrobates tinctorius	835	Dendrobates tinctorius	2	terraristikTemporal	2005-11-10	2005
Phyllobates terribilis	835	Phyllobates terribilis	1	terraristikTemporal	2005-11-10	2005
Ranitomeya imitator	835	Dendrobates imitator	1	terraristikTemporal	2005-11-10	2005
Hoplobatrachus tigerinus	835	Bufo typhonius	1	terraristikTemporal	2005-11-10	2005
Trachycephalus typhonius	835	Phrynohyas venulosa	1	terraristikTemporal	2005-11-10	2005
Agalychnis callidryas	835	Agalychnis callidryas	1	terraristikTemporal	2005-11-10	2005
Scaphiophryne gottlebei	835	Scaphiophryne gottlebei	1	terraristikTemporal	2005-11-10	2005
Scaphiophryne obscura	835	Scaphiophryne	1	terraristikTemporal	2005-11-10	2005
Scaphiophryne verrucosa	835	Scaphiophryne	1	terraristikTemporal	2005-11-10	2005
Bombina orientalis	836	Bombina orientalis	1	terraristikTemporal	2005-11-10	2005
Ceratophrys ornata	836	Ceratophrys ornata	1	terraristikTemporal	2005-11-10	2005
Epipedobates tricolor	836	Epipedobates tricolor	1	terraristikTemporal	2005-11-10	2005
Dendrobates auratus	836	Dendrobates auratus	1	terraristikTemporal	2005-11-10	2005
Dendrobates tinctorius	836	Dendrobates tinctorius	1	terraristikTemporal	2005-11-10	2005
Oophaga pumilio	836	Dendrobates pumilio	1	terraristikTemporal	2005-11-10	2005
Phyllobates terribilis	836	Phyllobates terribilis	1	terraristikTemporal	2005-11-10	2005
Ranitomeya amazonica	836	Dendrobates amazonicus	1	terraristikTemporal	2005-11-10	2005
Ranitomeya imitator	836	Dendrobates imitator	1	terraristikTemporal	2005-11-10	2005
Ranitomeya variabilis	836	Dendrobates variabilis	1	terraristikTemporal	2005-11-10	2005
Ranitomeya ventrimaculata	836	Dendrobates ventrimaculatus	1	terraristikTemporal	2005-11-10	2005
Gastrotheca peruana	836	Gastrotheca peruana	1	terraristikTemporal	2005-11-10	2005
Dendropsophus leucophyllatus	836	Hyla leucophyllata	1	terraristikTemporal	2005-11-10	2005
Trachycephalus resinifictrix	836	Phrynohyas resinifictrix	1	terraristikTemporal	2005-11-10	2005
Phyllomedusa hypochondrialis	836	Phyllomedusa hypochondrialis	1	terraristikTemporal	2005-11-10	2005
Pachyhynobius shangchengensis	836	Pachyhynobius shangchengensis	1	terraristikTemporal	2005-11-10	2005
Cynops ensicauda	836	Cynops ensicauda	1	terraristikTemporal	2005-11-10	2005
Cynops orientalis	836	Cynops orientalis	1	terraristikTemporal	2005-11-10	2005
Pleurodeles waltl	836	Pleurodeles waltl	1	terraristikTemporal	2005-11-10	2005
Salamandra algira	836	Salamandra algira	1	terraristikTemporal	2005-11-10	2005
Hoplobatrachus tigerinus	837	Bufo typhonius	1	terraristikTemporal	2005-11-10	2005
Trachycephalus resinifictrix	837	Phrynohyas resinifictrix	1	terraristikTemporal	2005-11-10	2005
Agalychnis callidryas	837	Agalychnis callidryas	1	terraristikTemporal	2005-11-10	2005
Phyllomedusa tarsius	837	Phyllomedusa tarsius	1	terraristikTemporal	2005-11-10	2005
Scaphiophryne gottlebei	837	Scaphiophryne gottlebei	1	terraristikTemporal	2005-11-10	2005
Scaphiophryne obscura	837	Scaphiophryne	1	terraristikTemporal	2005-11-10	2005
Scaphiophryne verrucosa	837	Scaphiophryne	1	terraristikTemporal	2005-11-10	2005
Pipa carvalhoi	837	Pipa carvalhoi	1	terraristikTemporal	2005-11-10	2005
Ambystoma maculatum	837	Ambystoma maculatum	1	terraristikTemporal	2005-11-10	2005
Ichthyosaura alpestris	837	Triturus alpestris	1	terraristikTemporal	2005-11-10	2005
Triturus marmoratus	837	Triturus marmoratus	1	terraristikTemporal	2005-11-10	2005
Bombina orientalis	838	Bombina orientalis	1	terraristikTemporal	2005-11-10	2005
Ameerega trivittata	838	Epipedobates trivittatus	1	terraristikTemporal	2005-11-10	2005
Hyla meridionalis	838	Hyla meridionalis	1	terraristikTemporal	2005-11-10	2005
Trachycephalus resinifictrix	838	Phrynohyas resinifictrix	1	terraristikTemporal	2005-11-10	2005
Ambystoma mexicanum	838	Ambystoma mexicanum	1	terraristikTemporal	2005-11-10	2005
Tylototriton shanjing	838	Tylototriton shanjing	1	terraristikTemporal	2005-11-10	2005
Tylototriton verrucosus	838	Tylototriton verrucosus	1	terraristikTemporal	2005-11-10	2005
Discoglossus pictus	839	Discoglossus pictus	1	terraristikTemporal	2005-11-10	2005
Bombina orientalis	839	Bombina orientalis	1	terraristikTemporal	2005-11-10	2005
Rhaebo guttatus	839	Bufo guttatus	1	terraristikTemporal	2005-11-10	2005
Ceratophrys ornata	839	Ceratophrys ornata	1	terraristikTemporal	2005-11-10	2005
Dendrobates auratus	839	Dendrobates auratus	1	terraristikTemporal	2005-11-10	2005
Dendrobates tinctorius	839	Dendrobates tinctorius	2	terraristikTemporal	2005-11-10	2005
Phyllobates terribilis	839	Phyllobates terribilis	1	terraristikTemporal	2005-11-10	2005
Phyllomedusa bicolor	839	Phyllomedusa bicolor	1	terraristikTemporal	2005-11-10	2005
Phyllomedusa hypochondrialis	839	Phyllomedusa hypochondrialis	1	terraristikTemporal	2005-11-10	2005
Phyllomedusa sauvagii	839	Phyllomedusa sauvagii	1	terraristikTemporal	2005-11-10	2005
Tylototriton shanjing	839	Tylototriton shanjing	1	terraristikTemporal	2005-11-10	2005
Mertensiella caucasica	839	Mertensiella caucasica	1	terraristikTemporal	2005-11-10	2005
Epipedobates tricolor	840	Epipedobates tricolor	1	terraristikTemporal	2005-11-10	2005
Oophaga lehmanni	840	Dendrobates lehmanni	1	terraristikTemporal	2005-11-10	2005
Phyllobates terribilis	840	Phyllobates terribilis	1	terraristikTemporal	2005-11-10	2005
Ranitomeya amazonica	840	Dendrobates amazonicus	1	terraristikTemporal	2005-11-10	2005
Ranitomeya ventrimaculata	840	Dendrobates ventrimaculatus	1	terraristikTemporal	2005-11-10	2005
Eleutherodactylus iberia	840	Eleutherodactylus iberia	1	terraristikTemporal	2005-11-10	2005
Eleutherodactylus planirostris	840	Eleutherodactylus planirostris	1	terraristikTemporal	2005-11-10	2005
Phyllomedusa bicolor	840	Phyllomedusa bicolor	1	terraristikTemporal	2005-11-10	2005
Phyllomedusa hypochondrialis	840	Phyllomedusa hypochondrialis	1	terraristikTemporal	2005-11-10	2005
Phyllomedusa sauvagii	840	Phyllomedusa sauvagii	1	terraristikTemporal	2005-11-10	2005
Phyllomedusa vaillantii	840	Phyllomedusa vaillantii	1	terraristikTemporal	2005-11-10	2005
Heterixalus boettgeri	840	Heterixalus boettgeri	1	terraristikTemporal	2005-11-10	2005
Ambystoma tigrinum	840	Ambystoma tigrinum	1	terraristikTemporal	2005-11-10	2005
Salamandra atra	840	Salamandra atra	1	terraristikTemporal	2005-11-10	2005
Salamandra salamandra	840	Salamandra salamandra	1	terraristikTemporal	2005-11-10	2005
Typhlonectes compressicauda	840	Typhlonectes compressicauda	1	terraristikTemporal	2005-11-10	2005
Bombina orientalis	841	Bombina orientalis	1	terraristikTemporal	2005-11-10	2005
Incilius alvarius	841	Bufo alvarius	1	terraristikTemporal	2005-11-10	2005
Rhaebo guttatus	841	Bufo guttatus	1	terraristikTemporal	2005-11-10	2005
Rhinella schneideri	841	Bufo paracnemis	1	terraristikTemporal	2005-11-10	2005
Epipedobates tricolor	841	Epipedobates tricolor	1	terraristikTemporal	2005-11-10	2005
Dendrobates auratus	841	Dendrobates auratus	1	terraristikTemporal	2005-11-10	2005
Dendrobates leucomelas	841	Dendrobates leucomelas	1	terraristikTemporal	2005-11-10	2005
Oophaga pumilio	841	Dendrobates pumilio	1	terraristikTemporal	2005-11-10	2005
Phyllobates bicolor	841	Phyllobates bicolor	1	terraristikTemporal	2005-11-10	2005
Phyllobates vittatus	841	Phyllobates vittatus	1	terraristikTemporal	2005-11-10	2005
Ranitomeya reticulata	841	Dendrobates reticulatus	1	terraristikTemporal	2005-11-10	2005
Ranitomeya ventrimaculata	841	Dendrobates ventrimaculatus	1	terraristikTemporal	2005-11-10	2005
Phyllomedusa bicolor	841	Phyllomedusa bicolor	1	terraristikTemporal	2005-11-10	2005
Phyllomedusa tarsius	841	Phyllomedusa tarsius	1	terraristikTemporal	2005-11-10	2005
Mantella aurantiaca	841	Mantella aurantiaca	1	terraristikTemporal	2005-11-10	2005
Salamandra salamandra	841	Salamandra salamandra	1	terraristikTemporal	2005-11-10	2005
Bombina maxima	842	Bombina maxima	1	terraristikTemporal	2005-11-10	2005
Rhinella rubropunctata	842	Bufo rubropunctatus	1	terraristikTemporal	2005-11-10	2005
Ceratophrys aurita	842	Ceratophrys aurita	1	terraristikTemporal	2005-11-10	2005
Ceratophrys ornata	842	Ceratophrys ornata	1	terraristikTemporal	2005-11-10	2005
Lepidobatrachus asper	842	Lepidobatrachus asper	1	terraristikTemporal	2005-11-10	2005
Dendrobates tinctorius	842	Dendrobates tinctorius	1	terraristikTemporal	2005-11-10	2005
Litoria caerulea	842	Litoria caerulea	1	terraristikTemporal	2005-11-10	2005
Phyllomedusa bicolor	842	Phyllomedusa bicolor	1	terraristikTemporal	2005-11-10	2005
Phyllomedusa boliviana	842	Phyllomedusa boliviana	1	terraristikTemporal	2005-11-10	2005
Phyllomedusa sauvagii	842	Phyllomedusa sauvagii	1	terraristikTemporal	2005-11-10	2005
Phyllomedusa tarsius	842	Phyllomedusa tarsius	1	terraristikTemporal	2005-11-10	2005
Cynops ensicauda	842	Cynops ensicauda	1	terraristikTemporal	2005-11-10	2005
Cynops pyrrhogaster	842	Cynops pyrrhogaster	1	terraristikTemporal	2005-11-10	2005
Ichthyosaura alpestris	842	Mesotriton alpestris	2	terraristikTemporal	2005-11-10	2005
Triturus marmoratus	842	Triturus marmoratus	1	terraristikTemporal	2005-11-10	2005
Tylototriton shanjing	842	Tylototriton shanjing	1	terraristikTemporal	2005-11-10	2005
Tylototriton verrucosus	842	Tylototriton verrucosus	1	terraristikTemporal	2005-11-10	2005
Adelphobates galactonotus	843	Dendrobates galactonotus	1	terraristikTemporal	2005-11-10	2005
Dendrobates auratus	843	Dendrobates auratus	1	terraristikTemporal	2005-11-10	2005
Dendrobates leucomelas	843	Dendrobates leucomelas	1	terraristikTemporal	2005-11-10	2005
Dendrobates tinctorius	843	Dendrobates tinctorius	1	terraristikTemporal	2005-11-10	2005
Phyllobates vittatus	843	Phyllobates vittatus	1	terraristikTemporal	2005-11-10	2005
Litoria caerulea	843	Litoria caerulea	1	terraristikTemporal	2005-11-10	2005
Microhyla heymonsi	843	Microhyla heymonsi	1	terraristikTemporal	2005-11-10	2005
Lissotriton montandoni	843	Triturus montandoni	1	terraristikTemporal	2005-11-10	2005
Triturus dobrogicus	843	Triturus dobrogicus	1	terraristikTemporal	2005-11-10	2005
Triturus marmoratus	843	Triturus marmoratus	1	terraristikTemporal	2005-11-10	2005
Pleurodeles waltl	848	Pleurodeles waltl	1	terraristikTemporal	2005-05-09	2005
Dendropsophus leucophyllatus	849	Dendropsophus leucophyllatus	1	terraristikTemporal	2016-06-30	2016
Triprion petasatus	849	Triprion petasatus	1	terraristikTemporal	2016-06-30	2016
Litoria caerulea	849	Litoria caerulea	1	terraristikTemporal	2016-06-30	2016
Engystomops pustulosus	849	Engystomops pustulosus	1	terraristikTemporal	2016-06-30	2016
Dendrobates tinctorius	851	Dendrobates tinctorius	1	terraristikTemporal	2008-01-27	2008
Mantella pulchra	851	Mantella pulchra	1	terraristikTemporal	2008-01-27	2008
Ceratophrys cornuta	855	Ceratophrys cornuta	1	terraristikTemporal	2008-12-19	2008
Ceratophrys cranwelli	855	Ceratophrys cranwelli	1	terraristikTemporal	2008-12-19	2008
Pyxicephalus adspersus	855	Pyxicephalus adspersus	1	terraristikTemporal	2008-12-19	2008
Ceratophrys cornuta	856	Ceratophrys cornuta	1	terraristikTemporal	2009-02-17	2009
Ceratophrys cranwelli	856	Ceratophrys cranwelli	1	terraristikTemporal	2009-02-17	2009
Ambystoma maculatum	856	Ambystoma maculatum	1	terraristikTemporal	2009-02-17	2009
Alytes obstetricans	859	Alytes obstetricans	1	terraristikTemporal	2009-07-15	2009
Dendrobates auratus	859	Dendrobates auratus	1	terraristikTemporal	2009-07-15	2009
Oophaga pumilio	859	Oophaga pumilio	2	terraristikTemporal	2009-07-15	2009
Bombina maxima	861	Bombina maxima	1	terraristikTemporal	2009-12-12	2009
Trachycephalus resinifictrix	861	Trachycephalus resinifictrix	1	terraristikTemporal	2009-12-12	2009
Litoria caerulea	861	Litoria caerulea	1	terraristikTemporal	2009-12-12	2009
Bombina maxima	862	Bombina maxima	1	terraristikTemporal	2009-12-12	2009
Trachycephalus resinifictrix	862	Trachycephalus resinifictrix	1	terraristikTemporal	2009-12-12	2009
Litoria caerulea	862	Litoria caerulea	1	terraristikTemporal	2009-12-12	2009
Dendrobates auratus	867	Dendrobates auratus	1	terraristikTemporal	2007-12-02	2007
Dendrobates tinctorius	867	Dendrobates tinctorius	1	terraristikTemporal	2007-12-02	2007
Eleutherodactylus planirostris	868	Eleutherodactylus planirostris	1	terraristikTemporal	2007-12-16	2007
Mantella aurantiaca	868	Mantella aurantiaca	1	terraristikTemporal	2007-12-16	2007
Bombina orientalis	870	Bombina orientalis	1	terraristikTemporal	2008-02-03	2008
Epipedobates tricolor	873	Epipedobates tricolor	1	terraristikTemporal	2008-03-24	2008
Dendrobates tinctorius	873	Dendrobates tinctorius	1	terraristikTemporal	2008-03-24	2008
Agalychnis lemur	873	Phyllomedusa lemur	1	terraristikTemporal	2008-03-24	2008
Leptopelis christyi	877	Leptopelis christyi	1	terraristikTemporal	2008-09-25	2008
Leptopelis vermiculatus	877	Leptopelis vermiculatus	1	terraristikTemporal	2008-09-25	2008
Dendrobates auratus	877	Dendrobates auratus	1	terraristikTemporal	2008-09-25	2008
Ranitomeya variabilis	877	Ranitomeya variabilis	1	terraristikTemporal	2008-09-25	2008
Phyllomedusa hypochondrialis	877	Phyllomedusa hypochondrialis	1	terraristikTemporal	2008-09-25	2008
Leptopelis christyi	878	Leptopelis christyi	1	terraristikTemporal	2008-09-26	2008
Leptopelis vermiculatus	878	Leptopelis vermiculatus	1	terraristikTemporal	2008-09-26	2008
Dendrobates auratus	878	Dendrobates auratus	1	terraristikTemporal	2008-09-26	2008
Ranitomeya variabilis	878	Ranitomeya variabilis	1	terraristikTemporal	2008-09-26	2008
Phyllomedusa hypochondrialis	878	Phyllomedusa hypochondrialis	1	terraristikTemporal	2008-09-26	2008
Bombina orientalis	879	Bombina orientalis	1	terraristikTemporal	2008-12-03	2008
Bombina variegata	879	Bombina variegata	1	terraristikTemporal	2008-12-03	2008
Bufo gargarizans	879	Bufo gargarizans	1	terraristikTemporal	2008-12-03	2008
Incilius alvarius	879	Bufo alvarius	1	terraristikTemporal	2008-12-03	2008
Rhaebo guttatus	879	Bufo guttatus	1	terraristikTemporal	2008-12-03	2008
Rhinella marina	879	Bufo marinus	1	terraristikTemporal	2008-12-03	2008
Dendrobates auratus	879	Dendrobates auratus	1	terraristikTemporal	2008-12-03	2008
Ambystoma andersoni	879	Ambystoma andersoni	1	terraristikTemporal	2008-12-03	2008
Neurergus kaiseri	879	Neurergus kaiseri	1	terraristikTemporal	2008-12-03	2008
Dendrobates tinctorius	880	Dendrobates tinctorius	1	terraristikTemporal	2008-12-17	2008
Dendrobates tinctorius	881	Dendrobates azureus	1	terraristikTemporal	2009-02-15	2009
Hyla arborea	881	Hyla arborea	1	terraristikTemporal	2009-02-15	2009
Hyla chinensis	881	Hyla chinensis	1	terraristikTemporal	2009-02-15	2009
Bombina orientalis	883	Bombina orientalis	1	terraristikTemporal	2009-06-17	2009
Bufotes viridis	883	Bufo viridis	1	terraristikTemporal	2009-06-17	2009
Epidalea calamita	883	Bufo calamita	1	terraristikTemporal	2009-06-17	2009
Rhinella granulosa	883	Bufo granulosus	1	terraristikTemporal	2009-06-17	2009
Rhinella marina	883	Bufo marinus	1	terraristikTemporal	2009-06-17	2009
Vandijkophrynus robinsoni	883	Bufo robinsoni	1	terraristikTemporal	2009-06-17	2009
Rana catesbeiana	883	Rana catesbeiana	1	terraristikTemporal	2009-06-17	2009
Ichthyosaura alpestris	883	Triturus alpestris	1	terraristikTemporal	2009-06-17	2009
Neurergus kaiseri	883	Neurergus kaiseri	1	terraristikTemporal	2009-06-17	2009
Triturus cristatus	883	Triturus cristatus	1	terraristikTemporal	2009-06-17	2009
Adelphobates galactonotus	885	Dendrobates galactonotus	1	terraristikTemporal	2010-01-03	2010
Dendrobates auratus	885	Dendrobates auratus	1	terraristikTemporal	2010-01-03	2010
Dendrobates tinctorius	885	Dendrobates azureus	1	terraristikTemporal	2010-01-03	2010
Tylototriton verrucosus	885	Tylototriton verrucosus	1	terraristikTemporal	2010-01-03	2010
Adelphobates galactonotus	886	Dendrobates galactonotus	1	terraristikTemporal	2010-01-04	2010
Dendrobates auratus	886	Dendrobates auratus	1	terraristikTemporal	2010-01-04	2010
Dendrobates tinctorius	886	Dendrobates azureus	1	terraristikTemporal	2010-01-04	2010
Adelphobates galactonotus	887	Dendrobates galactonotus	1	terraristikTemporal	2010-01-05	2010
Dendrobates auratus	887	Dendrobates auratus	1	terraristikTemporal	2010-01-05	2010
Dendrobates tinctorius	887	Dendrobates azureus	1	terraristikTemporal	2010-01-05	2010
Adelphobates galactonotus	888	Dendrobates galactonotus	1	terraristikTemporal	2010-01-05	2010
Dendrobates auratus	888	Dendrobates auratus	1	terraristikTemporal	2010-01-05	2010
Dendrobates tinctorius	888	Dendrobates azureus	1	terraristikTemporal	2010-01-05	2010
Litoria caerulea	889	Litoria caerulea	1	terraristikTemporal	2010-02-25	2010
Geotrypetes seraphini	889	Geotrypetes seraphini	1	terraristikTemporal	2010-02-25	2010
Ceratophrys ornata	890	Ceratophrys ornata	1	terraristikTemporal	2011-09-02	2011
Mantella baroni	892	Mantella baroni	1	terraristikTemporal	2012-01-01	2012
Mantella bernhardi	892	Mantella bernhardi	1	terraristikTemporal	2012-01-01	2012
Mantella madagascariensis	892	Mantella madagascariensis	1	terraristikTemporal	2012-01-01	2012
Mantella nigricans	892	Mantella nigricans	1	terraristikTemporal	2012-01-01	2012
Mantella pulchra	892	Mantella pulchra	1	terraristikTemporal	2012-01-01	2012
Agalychnis lemur	896	Phyllomedusa lemur	1	terraristikTemporal	2007-12-16	2007
Mantella aurantiaca	897	Mantella aurantiaca	1	terraristikTemporal	2008-01-03	2008
Dendrobates tinctorius	898	Dendrobates azureus	1	terraristikTemporal	2008-01-04	2008
Agalychnis lemur	898	Phyllomedusa lemur	1	terraristikTemporal	2008-01-04	2008
Mantella aurantiaca	898	Mantella aurantiaca	1	terraristikTemporal	2008-01-04	2008
Dendrobates tinctorius	899	Dendrobates tinctorius	1	terraristikTemporal	2008-02-12	2008
Mantella baroni	901	Mantella baroni	1	terraristikTemporal	2008-04-16	2008
Mantella haraldmeieri	901	Mantella haraldmeieri	1	terraristikTemporal	2008-04-16	2008
Mantella pulchra	901	Mantella pulchra	1	terraristikTemporal	2008-04-16	2008
Agalychnis callidryas	903	Agalychnis callidryas	1	terraristikTemporal	2008-09-25	2008
Dendrobates tinctorius	904	Dendrobates tinctorius	1	terraristikTemporal	2008-12-17	2008
Excidobates mysteriosus	906	Excidobates mysteriosus	1	terraristikTemporal	2009-03-16	2009
Oophaga lehmanni	906	Dendrobates lehmanni	1	terraristikTemporal	2009-03-16	2009
Cynops orientalis	906	Cynops orientalis	1	terraristikTemporal	2009-03-16	2009
Ceratophrys cranwelli	907	Ceratophrys cranwelli	1	terraristikTemporal	2009-03-18	2009
Ceratophrys ornata	907	Ceratophrys ornata	1	terraristikTemporal	2009-03-18	2009
Hyla cinerea	907	Hyla cinerea	1	terraristikTemporal	2009-03-18	2009
Hyperolius guttulatus	907	Hyperolius guttulatus	1	terraristikTemporal	2009-03-18	2009
Cynops orientalis	907	Cynops orientalis	1	terraristikTemporal	2009-03-18	2009
Neurergus kaiseri	907	Neurergus kaiseri	1	terraristikTemporal	2009-03-18	2009
Bufotes viridis	908	Bufo viridis	1	terraristikTemporal	2009-04-16	2009
Theloderma bicolor	908	Theloderma bicolor	1	terraristikTemporal	2009-04-16	2009
Theloderma corticale	908	Theloderma corticale	1	terraristikTemporal	2009-04-16	2009
Litoria caerulea	914	Litoria caerulea	1	terraristikTemporal	2010-01-04	2010
Ambystoma mexicanum	922	Ambystoma mexicanum	1	terraristikTemporal	2012-01-15	2012
Dendrobates tinctorius	926	Dendrobates tinctorius	1	terraristikTemporal	2008-02-16	2008
Oophaga pumilio	927	Oophaga pumilio	1	terraristikTemporal	2008-04-16	2008
Phyllobates vittatus	927	Phyllobates vittatus	1	terraristikTemporal	2008-04-16	2008
Scaphiophryne gottlebei	928	Scaphiophryne gottlebei	1	terraristikTemporal	2008-06-16	2008
Scaphiophryne obscura	928	Scaphiophryne	1	terraristikTemporal	2008-06-16	2008
Scaphiophryne verrucosa	928	Scaphiophryne	1	terraristikTemporal	2008-06-16	2008
Dendrobates auratus	929	Dendrobates auratus	1	terraristikTemporal	2008-09-25	2008
Mantella expectata	929	Mantella expectata	1	terraristikTemporal	2008-09-25	2008
Ambystoma mavortium	930	Ambystoma mavortium	1	terraristikTemporal	2008-12-17	2008
Ambystoma opacum	930	Ambystoma opacum	1	terraristikTemporal	2008-12-17	2008
Desmognathus fuscus	930	Desmognathus fuscus	1	terraristikTemporal	2008-12-17	2008
Desmognathus quadramaculatus	930	Desmognathus quadramaculatus	1	terraristikTemporal	2008-12-17	2008
Plethodon glutinosus	930	Plethodon glutinosus	1	terraristikTemporal	2008-12-17	2008
Cynops cyanurus	930	Cynops cyanurus	1	terraristikTemporal	2008-12-17	2008
Paramesotriton chinensis	930	Paramesotriton chinensis	1	terraristikTemporal	2008-12-17	2008
Triturus marmoratus	930	Triturus marmoratus	1	terraristikTemporal	2008-12-17	2008
Salamandra salamandra	930	Salamandra salamandra	1	terraristikTemporal	2008-12-17	2008
Pyxicephalus adspersus	931	Pyxicephalus adspersus	1	terraristikTemporal	2009-02-15	2009
Phrynoidis aspera	932	Bufo asper	1	terraristikTemporal	2009-03-16	2009
Rentapia hosii	932	Pedostibes hosii	1	terraristikTemporal	2009-03-16	2009
Dendrobates auratus	932	Dendrobates auratus	1	terraristikTemporal	2009-03-16	2009
Dendrobates tinctorius	932	Dendrobates tinctorius	1	terraristikTemporal	2009-03-16	2009
Ranitomeya amazonica	932	Ranitomeya amazonica	1	terraristikTemporal	2009-03-16	2009
Ranitomeya variabilis	932	Ranitomeya variabilis	1	terraristikTemporal	2009-03-16	2009
Ranitomeya ventrimaculata	932	Ranitomeya ventrimaculata	1	terraristikTemporal	2009-03-16	2009
Litoria infrafrenata	932	Litoria infrafrenata	1	terraristikTemporal	2009-03-16	2009
Cruziohyla calcarifer	932	Agalychnis calcarifer	1	terraristikTemporal	2009-03-16	2009
Phlyctimantis maculatus	932	Kassina maculata	1	terraristikTemporal	2009-03-16	2009
Mantella betsileo	932	Mantella betsileo	1	terraristikTemporal	2009-03-16	2009
Kaloula pulchra	932	Kaloula pulchra	1	terraristikTemporal	2009-03-16	2009
Microhyla pulchra	932	Microhyla pulchra	1	terraristikTemporal	2009-03-16	2009
Ambystoma tigrinum	932	Ambystoma tigrinum	1	terraristikTemporal	2009-03-16	2009
Neurergus kaiseri	932	Neurergus kaiseri	1	terraristikTemporal	2009-03-16	2009
Ceratophrys cranwelli	933	Ceratophrys cranwelli	1	terraristikTemporal	2009-04-15	2009
Ceratophrys ornata	933	Ceratophrys ornata	1	terraristikTemporal	2009-04-15	2009
Agalychnis callidryas	933	Agalychnis callidryas	1	terraristikTemporal	2009-04-15	2009
Epipedobates tricolor	934	Epipedobates tricolor	1	terraristikTemporal	2009-05-20	2009
Barbarophryne brongersmai	938	Bufo brongersmai	1	terraristikTemporal	2010-01-03	2010
Bufotes viridis	938	Bufo viridis	1	terraristikTemporal	2010-01-03	2010
Vandijkophrynus robinsoni	938	Bufo robinsoni	1	terraristikTemporal	2010-01-03	2010
Dendrobates auratus	938	Dendrobates auratus	1	terraristikTemporal	2010-01-03	2010
Dendrobates tinctorius	938	Dendrobates tinctorius	1	terraristikTemporal	2010-01-03	2010
Cynops orientalis	938	Cynops orientalis	1	terraristikTemporal	2010-01-03	2010
Triturus marmoratus	938	Triturus marmoratus	1	terraristikTemporal	2010-01-03	2010
Tylototriton verrucosus	938	Tylototriton verrucosus	1	terraristikTemporal	2010-01-03	2010
Salamandra salamandra	938	Salamandra salamandra	1	terraristikTemporal	2010-01-03	2010
Dendrobates auratus	939	Dendrobates auratus	1	terraristikTemporal	2010-01-04	2010
Dendrobates tinctorius	939	Dendrobates tinctorius	1	terraristikTemporal	2010-01-04	2010
Litoria caerulea	940	Litoria caerulea	1	terraristikTemporal	2010-01-24	2010
Phlyctimantis maculatus	940	Kassina maculata	1	terraristikTemporal	2010-01-24	2010
Pelobatrachus nasuta	940	Megophrys nasuta	1	terraristikTemporal	2010-01-24	2010
Lepidobatrachus laevis	941	Lepidobatrachus laevis	1	terraristikTemporal	2010-01-25	2010
Litoria caerulea	941	Litoria caerulea	1	terraristikTemporal	2010-01-25	2010
Phlyctimantis maculatus	941	Kassina maculata	1	terraristikTemporal	2010-01-25	2010
Pelobatrachus nasuta	941	Megophrys nasuta	1	terraristikTemporal	2010-01-25	2010
Dyscophus antongilii	941	Dyscophus antongilii	1	terraristikTemporal	2010-01-25	2010
Leptopelis uluguruensis	944	Leptopelis uluguruensis	1	terraristikTemporal	2011-05-17	2011
Leptopelis vermiculatus	945	Leptopelis vermiculatus	1	terraristikTemporal	2011-07-17	2011
Hyperolius puncticulatus	945	Hyperolius puncticulatus	1	terraristikTemporal	2011-07-17	2011
Cynops cyanurus	945	Cynops cyanurus	1	terraristikTemporal	2011-07-17	2011
Dendrobates auratus	946	Dendrobates auratus	1	terraristikTemporal	2011-09-15	2011
Dendrobates tinctorius	946	Dendrobates tinctorius	1	terraristikTemporal	2011-09-15	2011
Oophaga pumilio	946	Oophaga pumilio	1	terraristikTemporal	2011-09-15	2011
Phyllobates vittatus	946	Phyllobates vittatus	1	terraristikTemporal	2011-09-15	2011
Phyllomedusa sauvagii	946	Phyllomedusa sauvagii	1	terraristikTemporal	2011-09-15	2011
Neurergus derjugini	946	Neurergus derjugini	1	terraristikTemporal	2011-09-15	2011
Excidobates captivus	947	Excidobates captivus	1	terraristikTemporal	2011-11-14	2011
Excidobates mysteriosus	947	Excidobates mysteriosus	1	terraristikTemporal	2011-11-14	2011
Oophaga pumilio	947	Oophaga pumilio	1	terraristikTemporal	2011-11-14	2011
Ranitomeya reticulata	947	Ranitomeya reticulata	1	terraristikTemporal	2011-11-14	2011
Ranitomeya uakarii	947	Ranitomeya uakarii	1	terraristikTemporal	2011-11-14	2011
Dendrobates auratus	948	Dendrobates auratus	1	terraristikTemporal	2012-01-15	2012
Dendrobates tinctorius	948	Dendrobates tinctorius	1	terraristikTemporal	2012-01-15	2012
Phyllobates terribilis	948	Phyllobates terribilis	1	terraristikTemporal	2012-01-15	2012
Phyllomedusa boliviana	949	Phyllomedusa boliviana	1	terraristikTemporal	2007-10-16	2007
Dendrobates auratus	950	Dendrobates auratus	1	terraristikTemporal	2007-12-16	2007
Phlyctimantis maculatus	951	Kassina maculata	1	terraristikTemporal	2008-02-16	2008
Rhinella marina	952	Bufo marinus	1	terraristikTemporal	2008-04-16	2008
Rana catesbeiana	952	Rana catesbeiana	1	terraristikTemporal	2008-04-16	2008
Epidalea calamita	956	Bufo calamita	1	terraristikTemporal	2009-02-15	2009
Bombina orientalis	957	Bombina orientalis	1	terraristikTemporal	2009-03-16	2009
Dendrobates auratus	958	Dendrobates auratus	1	terraristikTemporal	2009-03-18	2009
Ambystoma tigrinum	958	Ambystoma tigrinum	1	terraristikTemporal	2009-03-18	2009
Neurergus kaiseri	958	Neurergus kaiseri	1	terraristikTemporal	2009-03-18	2009
Bombina bombina	959	Bombina bombina	1	terraristikTemporal	2009-04-15	2009
Bombina orientalis	959	Bombina orientalis	1	terraristikTemporal	2009-04-15	2009
Breviceps mossambicus	959	Breviceps mossambicus	1	terraristikTemporal	2009-04-15	2009
Anaxyrus cognatus	959	Bufo cognatus	1	terraristikTemporal	2009-04-15	2009
Anaxyrus fowleri	959	Bufo fowleri	1	terraristikTemporal	2009-04-15	2009
Bufotes viridis	959	Bufo viridis	1	terraristikTemporal	2009-04-15	2009
Rhinella marina	959	Bufo marinus	1	terraristikTemporal	2009-04-15	2009
Ceratophrys cranwelli	959	Ceratophrys cranwelli	1	terraristikTemporal	2009-04-15	2009
Hyla arborea	959	Hyla arborea	1	terraristikTemporal	2009-04-15	2009
Ambystoma maculatum	959	Ambystoma maculatum	1	terraristikTemporal	2009-04-15	2009
Cynops ensicauda	959	Cynops ensicauda	1	terraristikTemporal	2009-04-15	2009
Salamandra salamandra	959	Salamandra salamandra	1	terraristikTemporal	2009-04-15	2009
Epipedobates tricolor	960	Epipedobates tricolor	1	terraristikTemporal	2009-05-20	2009
Barbarophryne brongersmai	962	Bufo brongersmai	1	terraristikTemporal	2010-01-03	2010
Bufotes viridis	962	Bufo viridis	1	terraristikTemporal	2010-01-03	2010
Vandijkophrynus robinsoni	962	Bufo robinsoni	1	terraristikTemporal	2010-01-03	2010
Cynops orientalis	962	Cynops orientalis	1	terraristikTemporal	2010-01-03	2010
Triturus marmoratus	962	Triturus marmoratus	1	terraristikTemporal	2010-01-03	2010
Tylototriton verrucosus	962	Tylototriton verrucosus	1	terraristikTemporal	2010-01-03	2010
Salamandra salamandra	962	Salamandra salamandra	1	terraristikTemporal	2010-01-03	2010
Lepidobatrachus laevis	963	Lepidobatrachus laevis	1	terraristikTemporal	2010-01-04	2010
Pyxicephalus edulis	963	Pyxicephalus edulis	1	terraristikTemporal	2010-01-04	2010
Ambystoma tigrinum	968	Ambystoma tigrinum	1	terraristikTemporal	2011-05-17	2011
Dendrobates leucomelas	969	Dendrobates leucomelas	1	terraristikTemporal	2011-07-17	2011
Dendrobates tinctorius	969	Dendrobates tinctorius	1	terraristikTemporal	2011-07-17	2011
Phyllobates bicolor	969	Phyllobates bicolor	1	terraristikTemporal	2011-07-17	2011
Phyllobates vittatus	969	Phyllobates vittatus	1	terraristikTemporal	2011-07-17	2011
Dendrobates tinctorius	970	Dendrobates tinctorius	1	terraristikTemporal	2011-09-15	2011
Phyllomedusa sauvagii	970	Phyllomedusa sauvagii	1	terraristikTemporal	2011-09-15	2011
Neurergus derjugini	970	Neurergus derjugini	1	terraristikTemporal	2011-09-15	2011
Bombina orientalis	972	Bombina orientalis	1	terraristikTemporal	2012-01-15	2012
Dendrobates leucomelas	973	Dendrobates leucomelas	1	terraristikTemporal	2007-10-16	2007
Phyllobates vittatus	973	Phyllobates vittatus	1	terraristikTemporal	2007-10-16	2007
Ranitomeya ventrimaculata	973	Ranitomeya ventrimaculata	2	terraristikTemporal	2007-10-16	2007
Pyxicephalus adspersus	973	Pyxicephalus adspersus	1	terraristikTemporal	2007-10-16	2007
Adelphobates galactonotus	974	Adelphobates galactonotus	1	terraristikTemporal	2007-12-16	2007
Mantella aurantiaca	975	Mantella aurantiaca	1	terraristikTemporal	2008-02-16	2008
Agalychnis lemur	976	Phyllomedusa lemur	1	terraristikTemporal	2008-04-16	2008
Phyllomedusa tomopterna	976	Phyllomedusa tomopterna	1	terraristikTemporal	2008-04-16	2008
Pelobatrachus nasuta	976	Megophrys nasuta	1	terraristikTemporal	2008-04-16	2008
Neurergus kaiseri	976	Neurergus kaiseri	1	terraristikTemporal	2008-04-16	2008
Tylototriton verrucosus	976	Tylototriton verrucosus	1	terraristikTemporal	2008-04-16	2008
Epipedobates boulengeri	977	Epipedobates boulengeri	1	terraristikTemporal	2008-06-16	2008
Ceratophrys cornuta	978	Ceratophrys cornuta	1	terraristikTemporal	2008-09-25	2008
Lepidobatrachus laevis	978	Lepidobatrachus laevis	1	terraristikTemporal	2008-09-25	2008
Lepidobatrachus llanensis	978	Lepidobatrachus llanensis	1	terraristikTemporal	2008-09-25	2008
Pyxicephalus adspersus	978	Pyxicephalus adspersus	1	terraristikTemporal	2008-09-25	2008
Bombina orientalis	979	Bombina orientalis	1	terraristikTemporal	2008-12-17	2008
Bombina variegata	979	Bombina variegata	1	terraristikTemporal	2008-12-17	2008
Bufo gargarizans	979	Bufo gargarizans	1	terraristikTemporal	2008-12-17	2008
Incilius alvarius	979	Bufo alvarius	1	terraristikTemporal	2008-12-17	2008
Rhaebo guttatus	979	Bufo guttatus	1	terraristikTemporal	2008-12-17	2008
Rhinella marina	979	Bufo marinus	1	terraristikTemporal	2008-12-17	2008
Dendrobates auratus	979	Dendrobates auratus	1	terraristikTemporal	2008-12-17	2008
Ambystoma andersoni	979	Ambystoma andersoni	1	terraristikTemporal	2008-12-17	2008
Neurergus kaiseri	979	Neurergus kaiseri	1	terraristikTemporal	2008-12-17	2008
Rentapia hosii	980	Pedostibes hosii	1	terraristikTemporal	2009-02-15	2009
Dendrobates tinctorius	980	Dendrobates tinctorius	1	terraristikTemporal	2009-02-15	2009
Bombina orientalis	981	Bombina orientalis	1	terraristikTemporal	2009-03-18	2009
Phyllobates bicolor	981	Phyllobates bicolor	1	terraristikTemporal	2009-03-18	2009
Bombina orientalis	982	Bombina orientalis	1	terraristikTemporal	2009-04-17	2009
Theloderma bicolor	982	Theloderma bicolor	1	terraristikTemporal	2009-04-17	2009
Theloderma corticale	982	Theloderma corticale	1	terraristikTemporal	2009-04-17	2009
Bombina variegata	983	Bombina variegata	1	terraristikTemporal	2009-06-17	2009
Dendrobates auratus	983	Dendrobates auratus	1	terraristikTemporal	2009-06-17	2009
Oophaga pumilio	983	Oophaga pumilio	1	terraristikTemporal	2009-06-17	2009
Salamandra salamandra	983	Salamandra salamandra	1	terraristikTemporal	2009-06-17	2009
Lepidobatrachus laevis	986	Lepidobatrachus laevis	1	terraristikTemporal	2010-01-04	2010
Dendrobates tinctorius	986	Dendrobates tinctorius	1	terraristikTemporal	2010-01-04	2010
Oophaga pumilio	986	Oophaga pumilio	1	terraristikTemporal	2010-01-04	2010
Pyxicephalus edulis	986	Pyxicephalus edulis	1	terraristikTemporal	2010-01-04	2010
Ranitomeya ventrimaculata	987	Ranitomeya ventrimaculata	1	terraristikTemporal	2010-01-27	2010
Plethodon vehiculum	987	Plethodon vehiculum	1	terraristikTemporal	2010-01-27	2010
Melanophryniscus stelzneri	989	Melanophryniscus stelzneri	1	terraristikTemporal	2010-03-28	2010
Dendrobates auratus	990	Dendrobates auratus	1	terraristikTemporal	2010-05-29	2010
Dendrobates tinctorius	990	Dendrobates tinctorius	1	terraristikTemporal	2010-05-29	2010
Oophaga pumilio	990	Oophaga pumilio	1	terraristikTemporal	2010-05-29	2010
Dyscophus antongilii	995	Dyscophus antongilii	1	terraristikTemporal	2011-06-01	2011
Dendrobates tinctorius	997	Dendrobates tinctorius	1	terraristikTemporal	2011-09-29	2011
Oophaga pumilio	997	Oophaga pumilio	1	terraristikTemporal	2011-09-29	2011
Bombina orientalis	998	Bombina orientalis	1	terraristikTemporal	2011-11-28	2011
Neurergus crocatus	998	Neurergus crocatus	1	terraristikTemporal	2011-11-28	2011
Neurergus derjugini	998	Neurergus derjugini	1	terraristikTemporal	2011-11-28	2011
Tylototriton shanjing	998	Tylototriton shanjing	1	terraristikTemporal	2011-11-28	2011
Boana calcarata	999	Hyla calcarata	1	terraristikTemporal	2012-01-28	2012
Boana punctata	999	Hyla punctata	1	terraristikTemporal	2012-01-28	2012
Dendropsophus ebraccatus	999	Hyla ebraccata	1	terraristikTemporal	2012-01-28	2012
Dendropsophus leucophyllatus	999	Hyla leucophyllata	1	terraristikTemporal	2012-01-28	2012
Cynops cyanurus	999	Cynops cyanurus	1	terraristikTemporal	2012-01-28	2012
Dendrobates auratus	1002	Dendrobates auratus	1	terraristikTemporal	2007-12-01	2007
Agalychnis callidryas	1003	Agalychnis callidryas	1	terraristikTemporal	2007-12-16	2007
Dendrobates leucomelas	1004	Dendrobates leucomelas	1	terraristikTemporal	2008-01-02	2008
Dendrobates tinctorius	1004	Dendrobates tinctorius	1	terraristikTemporal	2008-01-02	2008
Alytes obstetricans	1006	Alytes obstetricans	1	terraristikTemporal	2008-02-16	2008
Bombina variegata	1006	Bombina variegata	1	terraristikTemporal	2008-02-16	2008
Bufotes viridis	1006	Bufo viridis	1	terraristikTemporal	2008-02-16	2008
Epidalea calamita	1006	Bufo calamita	1	terraristikTemporal	2008-02-16	2008
Hyla arborea	1006	Hyla arborea	1	terraristikTemporal	2008-02-16	2008
Pelobates fuscus	1006	Pelobates fuscus	1	terraristikTemporal	2008-02-16	2008
Lissotriton helveticus	1006	Triturus helveticus	1	terraristikTemporal	2008-02-16	2008
Alytes obstetricans	1007	Alytes obstetricans	1	terraristikTemporal	2008-02-16	2008
Bombina variegata	1007	Bombina variegata	1	terraristikTemporal	2008-02-16	2008
Bufotes viridis	1007	Bufo viridis	1	terraristikTemporal	2008-02-16	2008
Epidalea calamita	1007	Bufo calamita	1	terraristikTemporal	2008-02-16	2008
Hyla arborea	1007	Hyla arborea	1	terraristikTemporal	2008-02-16	2008
Pelobates fuscus	1007	Pelobates fuscus	1	terraristikTemporal	2008-02-16	2008
Lissotriton helveticus	1007	Triturus helveticus	1	terraristikTemporal	2008-02-16	2008
Litoria caerulea	1009	Litoria caerulea	1	terraristikTemporal	2008-03-28	2008
Pleurodeles waltl	1010	Pleurodeles waltl	1	terraristikTemporal	2008-04-16	2008
Ambystoma andersoni	1014	Ambystoma andersoni	1	terraristikTemporal	2008-06-16	2008
Salamandrina terdigitata	1014	Salamandrina terdigitata	1	terraristikTemporal	2008-06-16	2008
Epipedobates anthonyi	1015	Epipedobates anthonyi	1	terraristikTemporal	2008-09-25	2008
Dendrobates leucomelas	1015	Dendrobates leucomelas	1	terraristikTemporal	2008-09-25	2008
Dendrobates tinctorius	1015	Dendrobates tinctorius	1	terraristikTemporal	2008-09-25	2008
Dendrobates tinctorius	1016	Dendrobates tinctorius	1	terraristikTemporal	2008-09-25	2008
Bombina maxima	1019	Bombina maxima	1	terraristikTemporal	2008-12-17	2008
Bombina orientalis	1019	Bombina orientalis	1	terraristikTemporal	2008-12-17	2008
Dendrobates tinctorius	1019	Dendrobates tinctorius	1	terraristikTemporal	2008-12-17	2008
Bombina maxima	1020	Bombina maxima	1	terraristikTemporal	2008-12-17	2008
Bombina orientalis	1020	Bombina orientalis	1	terraristikTemporal	2008-12-17	2008
Dendrobates tinctorius	1020	Dendrobates tinctorius	1	terraristikTemporal	2008-12-17	2008
Ceratophrys cranwelli	1021	Ceratophrys cranwelli	1	terraristikTemporal	2009-02-03	2009
Ceratophrys ornata	1021	Ceratophrys ornata	1	terraristikTemporal	2009-02-03	2009
Dyscophus guineti	1021	Dyscophus guineti	1	terraristikTemporal	2009-02-03	2009
Pyxicephalus adspersus	1021	Pyxicephalus adspersus	1	terraristikTemporal	2009-02-03	2009
Ceratophrys cranwelli	1023	Ceratophrys cranwelli	1	terraristikTemporal	2009-02-16	2009
Phrynoidis aspera	1025	Bufo asper	1	terraristikTemporal	2009-03-16	2009
Rentapia hosii	1025	Pedostibes hosii	1	terraristikTemporal	2009-03-16	2009
Dendrobates auratus	1025	Dendrobates auratus	1	terraristikTemporal	2009-03-16	2009
Litoria infrafrenata	1025	Litoria infrafrenata	1	terraristikTemporal	2009-03-16	2009
Kaloula pulchra	1025	Kaloula pulchra	1	terraristikTemporal	2009-03-16	2009
Microhyla pulchra	1025	Microhyla pulchra	1	terraristikTemporal	2009-03-16	2009
Salamandra salamandra	1026	Salamandra salamandra	1	terraristikTemporal	2009-03-27	2009
Bufotes viridis	1027	Bufo viridis	1	terraristikTemporal	2009-04-11	2009
Pelobates fuscus	1027	Pelobates fuscus	1	terraristikTemporal	2009-04-11	2009
Pelophylax lessonae	1027	Rana esculenta	1	terraristikTemporal	2009-04-11	2009
Pelophylax ridibundus	1027	Rana esculenta	1	terraristikTemporal	2009-04-11	2009
Lissotriton vulgaris	1027	Triturus vulgaris	1	terraristikTemporal	2009-04-11	2009
Cruziohyla calcarifer	1028	Agalychnis calcarifer	1	terraristikTemporal	2009-04-17	2009
Pelobatrachus nasuta	1028	Megophrys nasuta	1	terraristikTemporal	2009-04-17	2009
Leptopelis vermiculatus	1029	Leptopelis vermiculatus	1	terraristikTemporal	2009-04-26	2009
Bombina variegata	1029	Bombina variegata	1	terraristikTemporal	2009-04-26	2009
Rhinella granulosa	1029	Bufo granulosus	1	terraristikTemporal	2009-04-26	2009
Hylarana erythraea	1029	Rana erythraea	1	terraristikTemporal	2009-04-26	2009
Litoria caerulea	1030	Litoria caerulea	1	terraristikTemporal	2009-05-23	2009
Hylarana erythraea	1030	Hylarana erythraea	2	terraristikTemporal	2009-05-23	2009
Theloderma corticale	1030	Theloderma corticale	1	terraristikTemporal	2009-05-23	2009
Ambystoma mexicanum	1032	Ambystoma mexicanum	1	terraristikTemporal	2009-10-04	2009
Taricha granulosa	1032	Taricha granulosa	1	terraristikTemporal	2009-10-04	2009
Adelphobates galactonotus	1033	Dendrobates galactonotus	1	terraristikTemporal	2010-01-03	2010
Dendrobates auratus	1033	Dendrobates auratus	1	terraristikTemporal	2010-01-03	2010
Dendrobates tinctorius	1033	Dendrobates tinctorius	2	terraristikTemporal	2010-01-03	2010
Epipedobates tricolor	1034	Epipedobates tricolor	1	terraristikTemporal	2010-01-05	2010
Adelphobates galactonotus	1034	Dendrobates galactonotus	1	terraristikTemporal	2010-01-05	2010
Dendrobates auratus	1034	Dendrobates auratus	1	terraristikTemporal	2010-01-05	2010
Dendrobates tinctorius	1034	Dendrobates tinctorius	2	terraristikTemporal	2010-01-05	2010
Phlyctimantis maculatus	1034	Kassina maculata	1	terraristikTemporal	2010-01-05	2010
Epipedobates tricolor	1035	Epipedobates tricolor	1	terraristikTemporal	2010-01-05	2010
Adelphobates galactonotus	1035	Dendrobates galactonotus	1	terraristikTemporal	2010-01-05	2010
Dendrobates auratus	1035	Dendrobates auratus	1	terraristikTemporal	2010-01-05	2010
Dendrobates tinctorius	1035	Dendrobates tinctorius	2	terraristikTemporal	2010-01-05	2010
Phlyctimantis maculatus	1035	Kassina maculata	1	terraristikTemporal	2010-01-05	2010
Adelphobates galactonotus	1036	Dendrobates galactonotus	1	terraristikTemporal	2010-01-05	2010
Dendrobates auratus	1036	Dendrobates auratus	1	terraristikTemporal	2010-01-05	2010
Dendrobates tinctorius	1036	Dendrobates tinctorius	2	terraristikTemporal	2010-01-05	2010
Adelphobates galactonotus	1037	Dendrobates galactonotus	1	terraristikTemporal	2010-01-05	2010
Dendrobates auratus	1037	Dendrobates auratus	1	terraristikTemporal	2010-01-05	2010
Dendrobates tinctorius	1037	Dendrobates tinctorius	2	terraristikTemporal	2010-01-05	2010
Phlyctimantis maculatus	1038	Kassina maculata	1	terraristikTemporal	2010-01-17	2010
Pelobatrachus nasuta	1038	Megophrys nasuta	1	terraristikTemporal	2010-01-17	2010
Dendrobates tinctorius	1039	Dendrobates tinctorius	1	terraristikTemporal	2010-02-25	2010
Dendrobates tinctorius	1040	Dendrobates tinctorius	1	terraristikTemporal	2010-02-25	2010
Ceratophrys cornuta	1042	Ceratophrys cornuta	1	terraristikTemporal	2010-03-08	2010
Epipedobates tricolor	1042	Epipedobates tricolor	1	terraristikTemporal	2010-03-08	2010
Incilius alvarius	1043	Bufo alvarius	1	terraristikTemporal	2010-03-15	2010
Rhinella marina	1043	Bufo marinus	1	terraristikTemporal	2010-03-15	2010
Ichthyosaura alpestris	1043	Triturus alpestris	1	terraristikTemporal	2010-03-15	2010
Lissotriton vulgaris	1043	Triturus vulgaris	1	terraristikTemporal	2010-03-15	2010
Triturus cristatus	1043	Triturus cristatus	1	terraristikTemporal	2010-03-15	2010
Leptopelis christyi	1049	Leptopelis christyi	1	terraristikTemporal	2010-06-04	2010
Leptopelis uluguruensis	1049	Leptopelis uluguruensis	1	terraristikTemporal	2010-06-04	2010
Leptopelis vermiculatus	1049	Leptopelis vermiculatus	1	terraristikTemporal	2010-06-04	2010
Melanophryniscus stelzneri	1049	Melanophryniscus stelzneri	1	terraristikTemporal	2010-06-04	2010
Dendrobates auratus	1049	Dendrobates auratus	1	terraristikTemporal	2010-06-04	2010
Dendrobates leucomelas	1049	Dendrobates leucomelas	1	terraristikTemporal	2010-06-04	2010
Afrixalus fornasini	1049	Afrixalus fornasini	1	terraristikTemporal	2010-06-04	2010
Hyperolius argus	1049	Hyperolius argus	1	terraristikTemporal	2010-06-04	2010
Hyperolius mitchelli	1049	Hyperolius mitchelli	1	terraristikTemporal	2010-06-04	2010
Hyperolius puncticulatus	1049	Hyperolius puncticulatus	1	terraristikTemporal	2010-06-04	2010
Kassina cochranae	1049	Kassina cochranae	1	terraristikTemporal	2010-06-04	2010
Kassina senegalensis	1049	Kassina senegalensis	1	terraristikTemporal	2010-06-04	2010
Pelobatrachus nasuta	1050	Megophrys nasuta	1	terraristikTemporal	2010-06-23	2010
Cynops cyanurus	1050	Cynops cyanurus	1	terraristikTemporal	2010-06-23	2010
Trachycephalus resinifictrix	1052	Trachycephalus resinifictrix	1	terraristikTemporal	2011-09-02	2011
Trachycephalus resinifictrix	1053	Trachycephalus resinifictrix	1	terraristikTemporal	2011-09-02	2011
Oophaga pumilio	1054	Oophaga pumilio	1	terraristikTemporal	2011-11-01	2011
Dendropsophus ebraccatus	1054	Hyla ebraccata	1	terraristikTemporal	2011-11-01	2011
Agalychnis saltator	1054	Agalychnis saltator	1	terraristikTemporal	2011-11-01	2011
Cruziohyla calcarifer	1054	Cruziohyla calcarifer	1	terraristikTemporal	2011-11-01	2011
Bombina orientalis	1056	Bombina orientalis	1	terraristikTemporal	2012-01-01	2012
Ambystoma californiense	1056	Ambystoma californiense	1	terraristikTemporal	2012-01-01	2012
Bombina orientalis	1057	Bombina orientalis	1	terraristikTemporal	2012-01-01	2012
Ambystoma californiense	1057	Ambystoma californiense	1	terraristikTemporal	2012-01-01	2012
Hyperolius fusciventris	1058	Hyperolius fusciventris	1	terraristikTemporal	2012-03-01	2012
Hyperolius parkeri	1058	Hyperolius parkeri	1	terraristikTemporal	2012-03-01	2012
Hyperolius fusciventris	1059	Hyperolius fusciventris	1	terraristikTemporal	2012-03-01	2012
Hyperolius parkeri	1059	Hyperolius parkeri	1	terraristikTemporal	2012-03-01	2012
Pipa parva	1060	Pipa parva	1	terraristikTemporal	2007-10-16	2007
Pipa pipa	1060	Pipa pipa	1	terraristikTemporal	2007-10-16	2007
Xenopus laevis	1060	Xenopus laevis	1	terraristikTemporal	2007-10-16	2007
Paramesotriton labiatus	1060	Pachytriton labiatus	1	terraristikTemporal	2007-10-16	2007
Pleurodeles waltl	1060	Pleurodeles waltl	1	terraristikTemporal	2007-10-16	2007
Triturus dobrogicus	1060	Triturus dobrogicus	1	terraristikTemporal	2007-10-16	2007
Dendrobates leucomelas	1063	Dendrobates leucomelas	1	terraristikTemporal	2008-04-16	2008
Dendrobates tinctorius	1063	Dendrobates tinctorius	1	terraristikTemporal	2008-04-16	2008
Neurergus kaiseri	1063	Neurergus kaiseri	1	terraristikTemporal	2008-04-16	2008
Triturus cristatus	1063	Triturus cristatus	1	terraristikTemporal	2008-04-16	2008
Salamandrina terdigitata	1063	Salamandrina terdigitata	1	terraristikTemporal	2008-04-16	2008
Ceratophrys cranwelli	1065	Ceratophrys cranwelli	1	terraristikTemporal	2008-09-25	2008
Pipa pipa	1065	Pipa pipa	1	terraristikTemporal	2008-09-25	2008
Ambystoma maculatum	1065	Ambystoma maculatum	1	terraristikTemporal	2008-09-25	2008
Plethodon jordani	1065	Plethodon jordani	1	terraristikTemporal	2008-09-25	2008
Bombina orientalis	1067	Bombina orientalis	1	terraristikTemporal	2009-02-15	2009
Dendrobates auratus	1068	Dendrobates auratus	1	terraristikTemporal	2009-04-17	2009
Dendrobates leucomelas	1068	Dendrobates leucomelas	1	terraristikTemporal	2009-04-17	2009
Dendrobates tinctorius	1068	Dendrobates tinctorius	1	terraristikTemporal	2009-04-17	2009
Dendrobates truncatus	1068	Dendrobates truncatus	1	terraristikTemporal	2009-04-17	2009
Dendropsophus marmoratus	1068	Hyla marmorata	1	terraristikTemporal	2009-04-17	2009
Hyperolius argus	1068	Hyperolius argus	1	terraristikTemporal	2009-04-17	2009
Hyperolius fusciventris	1068	Hyperolius fusciventris	1	terraristikTemporal	2009-04-17	2009
Hyperolius puncticulatus	1068	Hyperolius puncticulatus	1	terraristikTemporal	2009-04-17	2009
Phlyctimantis maculatus	1068	Kassina maculata	1	terraristikTemporal	2009-04-17	2009
Polypedates leucomystax	1068	Polypedates leucomystax	1	terraristikTemporal	2009-04-17	2009
Polypedates teraiensis	1068	Polypedates leucomystax	1	terraristikTemporal	2009-04-17	2009
Paramesotriton labiatus	1068	Pachytriton labiatus	1	terraristikTemporal	2009-04-17	2009
Barbarophryne brongersmai	1072	Bufo brongersmai	1	terraristikTemporal	2010-01-04	2010
Bufotes viridis	1072	Bufo viridis	1	terraristikTemporal	2010-01-04	2010
Vandijkophrynus robinsoni	1072	Bufo robinsoni	1	terraristikTemporal	2010-01-04	2010
Cynops orientalis	1072	Cynops orientalis	1	terraristikTemporal	2010-01-04	2010
Triturus marmoratus	1072	Triturus marmoratus	1	terraristikTemporal	2010-01-04	2010
Tylototriton verrucosus	1072	Tylototriton verrucosus	1	terraristikTemporal	2010-01-04	2010
Salamandra salamandra	1072	Salamandra salamandra	1	terraristikTemporal	2010-01-04	2010
Dendrobates tinctorius	1073	Dendrobates azureus	1	terraristikTemporal	2010-01-27	2010
Rhaebo guttatus	1075	Bufo guttatus	1	terraristikTemporal	2010-02-25	2010
Boana boans	1075	Hyla boans	1	terraristikTemporal	2010-02-25	2010
Dendropsophus marmoratus	1075	Hyla marmorata	1	terraristikTemporal	2010-02-25	2010
Hyla cinerea	1075	Hyla cinerea	1	terraristikTemporal	2010-02-25	2010
Odorrana livida	1075	Rana livida	1	terraristikTemporal	2010-02-25	2010
Leptopelis grandiceps	1076	Leptopelis barbouri	1	terraristikTemporal	2010-03-30	2010
Oophaga pumilio	1076	Oophaga pumilio	1	terraristikTemporal	2010-03-30	2010
Phyllomedusa hypochondrialis	1076	Phyllomedusa hypochondrialis	1	terraristikTemporal	2010-03-30	2010
Pelobatrachus nasuta	1076	Megophrys nasuta	1	terraristikTemporal	2010-03-30	2010
Polypedates otilophus	1076	Polypedates otilophus	1	terraristikTemporal	2010-03-30	2010
Rhacophorus nigropalmatus	1076	Rhacophorus nigropalmatus	1	terraristikTemporal	2010-03-30	2010
Melanophryniscus stelzneri	1080	Melanophryniscus stelzneri	1	terraristikTemporal	2010-09-30	2010
Ceratophrys cranwelli	1081	Ceratophrys cranwelli	1	terraristikTemporal	2010-11-30	2010
Ceratophrys joazeirensis	1081	Ceratophrys joazeirensis	1	terraristikTemporal	2010-11-30	2010
Ceratophrys stolzmanni	1081	Ceratophrys stolzmanni	1	terraristikTemporal	2010-11-30	2010
Dendrobates leucomelas	1081	Dendrobates leucomelas	1	terraristikTemporal	2010-11-30	2010
Dendrobates tinctorius	1081	Dendrobates tinctorius	1	terraristikTemporal	2010-11-30	2010
Mantella aurantiaca	1081	Mantella aurantiaca	1	terraristikTemporal	2010-11-30	2010
Mantella madagascariensis	1081	Mantella madagascariensis	1	terraristikTemporal	2010-11-30	2010
Bombina orientalis	1082	Bombina orientalis	1	terraristikTemporal	2011-01-30	2011
Bombina maxima	1085	Bombina maxima	1	terraristikTemporal	2011-07-31	2011
Bombina variegata	1085	Bombina variegata	1	terraristikTemporal	2011-07-31	2011
Bufotes viridis	1085	Bufo viridis	1	terraristikTemporal	2011-07-31	2011
Epidalea calamita	1085	Bufo calamita	1	terraristikTemporal	2011-07-31	2011
Ambystoma opacum	1085	Ambystoma opacum	1	terraristikTemporal	2011-07-31	2011
Ambystoma tigrinum	1085	Ambystoma tigrinum	1	terraristikTemporal	2011-07-31	2011
Triturus carnifex	1085	Triturus carnifex	1	terraristikTemporal	2011-07-31	2011
Triturus cristatus	1085	Triturus cristatus	1	terraristikTemporal	2011-07-31	2011
Triturus marmoratus	1085	Triturus marmoratus	1	terraristikTemporal	2011-07-31	2011
Tylototriton kweichowensis	1085	Tylototriton kweichowensis	1	terraristikTemporal	2011-07-31	2011
Bombina maxima	1086	Bombina maxima	1	terraristikTemporal	2011-09-29	2011
Bombina variegata	1086	Bombina variegata	1	terraristikTemporal	2011-09-29	2011
Bufotes viridis	1086	Bufo viridis	1	terraristikTemporal	2011-09-29	2011
Epidalea calamita	1086	Bufo calamita	1	terraristikTemporal	2011-09-29	2011
Dendrobates leucomelas	1086	Dendrobates leucomelas	1	terraristikTemporal	2011-09-29	2011
Phyllobates terribilis	1086	Phyllobates terribilis	1	terraristikTemporal	2011-09-29	2011
Hyla arborea	1086	Hyla arborea	1	terraristikTemporal	2011-09-29	2011
Pelobates fuscus	1086	Pelobates fuscus	1	terraristikTemporal	2011-09-29	2011
Neurergus strauchii	1086	Neurergus strauchii	1	terraristikTemporal	2011-09-29	2011
Triturus carnifex	1086	Triturus carnifex	1	terraristikTemporal	2011-09-29	2011
Triturus dobrogicus	1086	Triturus dobrogicus	1	terraristikTemporal	2011-09-29	2011
Triturus marmoratus	1086	Triturus marmoratus	1	terraristikTemporal	2011-09-29	2011
Excidobates mysteriosus	1089	Dendrobates mysteriosus	1	terraristikTemporal	2007-10-16	2007
Mantella milotympanum	1091	Mantella milotympanum	1	terraristikTemporal	2008-02-16	2008
Phyllomedusa boliviana	1093	Phyllomedusa boliviana	1	terraristikTemporal	2008-06-16	2008
Dendrobates auratus	1097	Dendrobates auratus	1	terraristikTemporal	2009-04-17	2009
Phyllobates vittatus	1097	Phyllobates vittatus	1	terraristikTemporal	2009-04-17	2009
Ambystoma gracile	1097	Ambystoma gracile	1	terraristikTemporal	2009-04-17	2009
Ambystoma macrodactylum	1097	Ambystoma macrodactylum	1	terraristikTemporal	2009-04-17	2009
Ambystoma opacum	1097	Ambystoma opacum	1	terraristikTemporal	2009-04-17	2009
Liua shihi	1097	Ranodon shihi	1	terraristikTemporal	2009-04-17	2009
Plethodon glutinosus	1097	Plethodon glutinosus	1	terraristikTemporal	2009-04-17	2009
Cynops cyanurus	1097	Cynops cyanurus	1	terraristikTemporal	2009-04-17	2009
Cynops orientalis	1097	Cynops orientalis	1	terraristikTemporal	2009-04-17	2009
Lissotriton vulgaris	1097	Triturus vulgaris	1	terraristikTemporal	2009-04-17	2009
Taricha torosa	1097	Taricha torosa	1	terraristikTemporal	2009-04-17	2009
Triturus marmoratus	1097	Triturus marmoratus	1	terraristikTemporal	2009-04-17	2009
Tylototriton verrucosus	1097	Tylototriton verrucosus	1	terraristikTemporal	2009-04-17	2009
Litoria caerulea	1099	Litoria caerulea	1	terraristikTemporal	2010-01-03	2010
Phlyctimantis maculatus	1099	Kassina maculata	1	terraristikTemporal	2010-01-03	2010
Pelobatrachus nasuta	1099	Megophrys nasuta	1	terraristikTemporal	2010-01-03	2010
Barbarophryne brongersmai	1100	Bufo brongersmai	1	terraristikTemporal	2010-01-04	2010
Bufotes viridis	1100	Bufo viridis	1	terraristikTemporal	2010-01-04	2010
Vandijkophrynus robinsoni	1100	Bufo robinsoni	1	terraristikTemporal	2010-01-04	2010
Litoria caerulea	1100	Litoria caerulea	1	terraristikTemporal	2010-01-04	2010
Phlyctimantis maculatus	1100	Kassina maculata	1	terraristikTemporal	2010-01-04	2010
Pelobatrachus nasuta	1100	Megophrys nasuta	1	terraristikTemporal	2010-01-04	2010
Cynops orientalis	1100	Cynops orientalis	1	terraristikTemporal	2010-01-04	2010
Triturus marmoratus	1100	Triturus marmoratus	1	terraristikTemporal	2010-01-04	2010
Tylototriton verrucosus	1100	Tylototriton verrucosus	1	terraristikTemporal	2010-01-04	2010
Salamandra salamandra	1100	Salamandra salamandra	1	terraristikTemporal	2010-01-04	2010
Plethodon vehiculum	1101	Plethodon vehiculum	1	terraristikTemporal	2010-01-24	2010
Dendropsophus ebraccatus	1102	Hyla ebraccata	1	terraristikTemporal	2010-02-25	2010
Oophaga pumilio	1103	Oophaga pumilio	1	terraristikTemporal	2010-05-26	2010
Ambystoma mexicanum	1104	Ambystoma mexicanum	1	terraristikTemporal	2010-07-28	2010
Dendrobates tinctorius	1105	Dendrobates tinctorius	1	terraristikTemporal	2010-09-26	2010
Phyllomedusa bicolor	1105	Phyllomedusa bicolor	1	terraristikTemporal	2010-09-26	2010
Pelobatrachus nasuta	1105	Megophrys nasuta	1	terraristikTemporal	2010-09-26	2010
Polypedates colletti	1105	Polypedates colletti	1	terraristikTemporal	2010-09-26	2010
Ceratophrys cranwelli	1108	Ceratophrys cranwelli	1	terraristikTemporal	2011-01-29	2011
Ceratophrys stolzmanni	1108	Ceratophrys stolzmanni	1	terraristikTemporal	2011-01-29	2011
Dendrobates auratus	1108	Dendrobates auratus	1	terraristikTemporal	2011-01-29	2011
Oophaga pumilio	1108	Oophaga pumilio	1	terraristikTemporal	2011-01-29	2011
Litoria caerulea	1108	Litoria caerulea	1	terraristikTemporal	2011-01-29	2011
Xenopus laevis	1108	Xenopus laevis	1	terraristikTemporal	2011-01-29	2011
Phyllomedusa bicolor	1110	Phyllomedusa bicolor	1	terraristikTemporal	2011-07-30	2011
Phyllomedusa hypochondrialis	1110	Phyllomedusa hypochondrialis	1	terraristikTemporal	2011-07-30	2011
Oophaga pumilio	1111	Oophaga pumilio	1	terraristikTemporal	2011-09-29	2011
Agalychnis callidryas	1111	Agalychnis callidryas	1	terraristikTemporal	2011-09-29	2011
Salamandra salamandra	1111	Salamandra salamandra	1	terraristikTemporal	2011-09-29	2011
Salamandra salamandra	1114	Salamandra salamandra	1	terraristikTemporal	2007-10-16	2007
Mantella betsileo	1116	Mantella betsileo	1	terraristikTemporal	2008-02-16	2008
Epipedobates tricolor	1120	Epipedobates tricolor	1	terraristikTemporal	2008-12-17	2008
Pelobatrachus nasuta	1121	Megophrys nasuta	1	terraristikTemporal	2009-02-15	2009
Bufotes viridis	1124	Bufo viridis	1	terraristikTemporal	2009-11-27	2009
Hyla arborea	1124	Hyla arborea	1	terraristikTemporal	2009-11-27	2009
Anaxyrus terrestris	1127	Bufo terrestris	1	terraristikTemporal	2010-01-27	2010
Incilius alvarius	1127	Bufo alvarius	1	terraristikTemporal	2010-01-27	2010
Dendrobates tinctorius	1127	Dendrobates tinctorius	1	terraristikTemporal	2010-01-27	2010
Afrixalus dorsalis	1127	Afrixalus dorsalis	1	terraristikTemporal	2010-01-27	2010
[truncated: 4,510 more rows]
