# Supplementary material for: Gaps in global wildlife trade monitoring leave amphibians vulnerable
Source: eLife. 2021 Aug 12;10:e70086. doi: 10.7554/eLife.70086 (PMC8425949; doi:10.7554/eLife.70086)
Supplement: Source data 5. [file elife-70086-data5.csv]

species	meat	pet	commercial	medicine	research	all	meat	pet	commercial	medical	research	all
Abavorana luctuosa	meat	pet	trade		research	all	411	805	930	122	664	1285
Acris crepitans					research	all
Acris gryllus			trade			all
Adelphobates castaneoticus		pet	trade		research	all
Adelphobates galactonotus		pet	trade		research	all
Adelphobates quinquevittatus		pet	trade		research	all
Adenomera andreae	meat	pet	trade		research	all
Adenomera hylaedactyla					research	all
Adenomera martinezi					research	all
Afrixalus dorsalis	meat	pet	trade		research	all
Afrixalus equatorialis	meat	pet	trade		research	all
Afrixalus fornasini		pet	trade		research	all
Afrixalus fulvovittatus		pet	trade		research	all
Afrixalus laevis					research	all
Afrixalus orophilus		pet	trade			all
Afrixalus osorioi	meat	pet	trade		research	all
Afrixalus paradorsalis		pet	trade		research	all
Afrixalus quadrivittatus	meat	pet	trade		research	all
Afrixalus septentrionalis	meat	pet	trade		research	all
Afrixalus stuhlmanni		pet				all
Afrixalus sylvaticus		pet				all
Agalychnis annae		pet	trade		research	all
Agalychnis callidryas	meat	pet	trade	medicine		all
Agalychnis dacnicolor		pet	trade		research	all
Agalychnis lemur	meat	pet	trade		research	all
Agalychnis medinae		pet	trade			all
Agalychnis moreletii		pet	trade		research	all
Agalychnis saltator		pet	trade			all
Agalychnis spurrelli		pet				all
Allobates femoralis		pet	trade		research	all
Allobates talamancae		pet	trade			all
Allobates trilineatus	meat		trade		research	all
Allobates zaparo			trade		research	all
Allophryne ruthveni	meat	pet	trade		research	all
Altiphrynoides malcolmi						all
Alytes muletensis		pet	trade			all
Alytes obstetricans		pet	trade			all
Ambystoma andersoni	meat	pet	trade	medicine		all
Ambystoma annulatum		pet				all
Ambystoma californiense		pet			research	all
Ambystoma dumerilii	meat	pet	trade	medicine	research	all
Ambystoma gracile		pet	trade			all
Ambystoma granulosum	meat		trade			all
Ambystoma jeffersonianum					research	all
Ambystoma laterale		pet	trade		research	all
Ambystoma leorae	meat		trade			all
Ambystoma lermaense	meat		trade	medicine	research	all
Ambystoma macrodactylum	meat	pet	trade	medicine	research	all
Ambystoma maculatum		pet	trade	medicine	research	all
Ambystoma mavortium		pet	trade			all
Ambystoma mexicanum	meat	pet	trade	medicine	research	all
Ambystoma opacum	meat	pet	trade		research	all
Ambystoma ordinarium		pet	trade	medicine		all
Ambystoma rivulare		pet	trade			all
Ambystoma talpoideum		pet	trade		research	all
Ambystoma texanum		pet	trade		research	all
Ambystoma tigrinum	meat	pet	trade		research	all
Ambystoma velasci	meat	pet	trade			all
Ameerega altamazonica			trade			all
Ameerega bassleri		pet	trade		research	all
Ameerega berohoka					research	all
Ameerega bilinguis			trade		research	all
Ameerega boliviana		pet	trade			all
Ameerega braccata					research	all
Ameerega cainarachi		pet	trade		research	all
Ameerega erythromos					research	all
Ameerega flavopicta		pet	trade			all
Ameerega hahneli		pet	trade		research	all
Ameerega macero		pet	trade		research	all
Ameerega maculata		pet	trade			all
Ameerega parvula		pet	trade		research	all
Ameerega pepperi		pet	trade			all
Ameerega petersi			trade		research	all
Ameerega picta		pet	trade		research	all
Ameerega pongoensis		pet	trade			all
Ameerega pulchripecta		pet	trade		research	all
Ameerega rubriventris		pet	trade			all
Ameerega silverstonei		pet	trade		research	all
Ameerega simulans					research	all
Ameerega trivittata	meat	pet	trade		research	all
Amietia angolensis					research	all
Amietia vertebralis				medicine		all
Amietophrynus kisangani	meat	pet	trade		research	all
Amnirana albolabris					research	all
Amnirana amnicola					research	all
Amnirana galamensis	meat		trade		research	all
Amolops caelumnoctis	meat		trade			all
Amolops chunganensis	meat		trade			all
Amolops cremnobatus	meat	pet	trade		research	all
Amolops formosus	meat		trade			all
Amolops hainanensis	meat		trade			all
Amolops larutensis		pet	trade		research	all
Amolops loloensis	meat		trade			all
Amolops monticola				medicine		all
Amolops ricketti					research	all
Amphiuma means		pet	trade		research	all
Amphiuma pholeter		pet	trade			all
Amphiuma tridactylum					research	all
Anaxyrus americanus		pet	trade	medicine	research	all
Anaxyrus baxteri			trade			all
Anaxyrus boreas		pet	trade	medicine	research	all
Anaxyrus cognatus		pet	trade		research	all
Anaxyrus debilis		pet	trade			all
Anaxyrus exsul		pet	trade		research	all
Anaxyrus fowleri		pet	trade			all
Anaxyrus hemiophrys					research	all
Anaxyrus microscaphus		pet	trade		research	all
Anaxyrus punctatus		pet	trade		research	all
Anaxyrus quercicus		pet	trade			all
Anaxyrus retiformis		pet	trade		research	all
Anaxyrus speciosus		pet				all
Anaxyrus terrestris		pet	trade			all
Anaxyrus woodhousii		pet	trade		research	all
Andinobates abditus						all
Andinobates bombetes		pet	trade		research	all
Andinobates claudiae		pet	trade		research	all
Andinobates dorisswansonae		pet	trade			all
Andinobates fulguritus	meat	pet	trade		research	all
Andinobates minutus		pet	trade		research	all
Andinobates opisthomelas		pet	trade			all
Andinobates victimatus		pet	trade			all
Andinobates viridis			trade			all
Andinobates virolinensis		pet	trade			all
Andrias davidianus		pet	trade		research	all
Andrias japonicus		pet	trade		research	all
Aneides aeneus		pet	trade			all
Aneides flavipunctatus		pet	trade		research	all
Aneides lugubris		pet	trade		research	all
Anotheca spinosa		pet				all
Ansonia inthanon				medicine		all
Ansonia spinulifer						all
Arthroleptis adelphus					research	all
Arthroleptis adolfifriederici					research	all
Arthroleptis loveridgei	meat	pet	trade		research	all
Arthroleptis poecilonotus	meat	pet	trade		research	all
Arthroleptis pyrrhoscelis					research	all
Arthroleptis stenodactylus					research	all
Arthroleptis sylvaticus					research	all
Arthroleptis variabilis					research	all
Arthroleptis xenodactyloides					research	all
Arthroleptis xenodactylus					research	all
Astylosternus batesi					research	all
Atelopus balios		pet	trade			all
Atelopus barbotini		pet				all
Atelopus carbonerensis		pet	trade			all
Atelopus certus	meat	pet	trade		research	all
Atelopus cruciger		pet	trade			all
Atelopus elegans		pet	trade			all
Atelopus flavescens		pet	trade			all
Atelopus franciscus		pet	trade			all
Atelopus glyphus	meat	pet	trade		research	all
Atelopus hoogmoedi	meat	pet	trade		research	all
Atelopus ignescens				medicine		all
Atelopus limosus		pet	trade		research	all
Atelopus peruensis		pet	trade			all
Atelopus pulcher		pet	trade			all
Atelopus senex		pet	trade			all
Atelopus siranus		pet	trade			all
Atelopus spumarius		pet				all
Atelopus spurrelli		pet	trade			all
Atelopus varius	meat	pet	trade		research	all
Atelopus zeteki		pet	trade		research	all
Aubria masako	meat	pet	trade		research	all
Aubria subsigillata	meat	pet	trade		research	all
Austrochaperina palmipes					research	all
Austrochaperina rivularis	meat	pet	trade		research	all
Barbarophryne brongersmai		pet	trade			all
Barbourula kalimantanensis	meat		trade	medicine		all
Batrachoseps attenuatus		pet	trade		research	all
Batrachoseps stebbinsi					research	all
Batrachuperus karlschmidti				medicine		all
Batrachuperus londongensis	meat	pet	trade	medicine		all
Batrachuperus pinchonii				medicine		all
Batrachuperus taibaiensis				medicine		all
Batrachuperus tibetanus	meat		trade	medicine		all
Batrachuperus yenyuanensis				medicine		all
Boana aguilari	meat	pet	trade		research	all
Boana boans	meat	pet	trade		research	all
Boana calcarata		pet	trade		research	all
Boana cinerascens	meat	pet	trade		research	all
Boana crepitans	meat	pet	trade		research	all
Boana fasciata	meat	pet	trade		research	all
Boana geographica		pet	trade		research	all
Boana heilprini	meat	pet	trade		research	all
Boana lanciformis		pet	trade			all
Boana picturata	meat	pet	trade		research	all
Boana punctata		pet	trade			all
Boana raniceps	meat	pet	trade		research	all
Boana rosenbergi	meat		trade		research	all
Boehmantis microtympanum	meat		trade			all
Bokermannohyla ibitiguara	meat	pet	trade		research	all
Bokermannohyla sazimai	meat	pet	trade		research	all
Bolitoglossa colonnea					research	all
Bolitoglossa dofleini		pet	trade	medicine	research	all
Bolitoglossa mexicana		pet	trade		research	all
Bolitoglossa pesrubra		pet	trade			all
Bolitoglossa schizodactyla					research	all
Bombina bombina	meat	pet	trade		research	all
Bombina lichuanensis			trade			all
Bombina maxima				medicine	research	all
Bombina microdeladigitora		pet				all
Bombina orientalis	meat	pet	trade	medicine	research	all
Bombina pachypus		pet	trade			all
Bombina variegata		pet	trade			all
Boophis albilabris		pet	trade		research	all
Boophis albipunctatus		pet	trade		research	all
Boophis ankaratra		pet	trade			all
Boophis boehmei			trade			all
Boophis elenae		pet	trade		research	all
Boophis erythrodactylus		pet	trade		research	all
Boophis goudotii	meat		trade			all
Boophis luteus		pet	trade		research	all
Boophis madagascariensis		pet	trade		research	all
Boophis marojezensis			trade			all
Boophis microtympanum		pet	trade		research	all
Boophis rappiodes		pet	trade			all
Boophis tephraeomystax			trade			all
Boophis viridis		pet	trade			all
Boulengerula taitana		pet	trade			all
Brachycephalus ephippium					research	all
Brachytarsophrys carinense		pet	trade		research	all
Brachytarsophrys chuannanensis	meat		trade			all
Brachytarsophrys feae	meat		trade			all
Brachytarsophrys intermedia	meat		trade			all
Breviceps adspersus		pet	trade		research	all
Breviceps fuscus		pet	trade			all
Breviceps mossambicus		pet	trade		research	all
Bryophryne cophites	meat	pet	trade		research	all
Bryophryne hanssaueri	meat	pet	trade		research	all
Bryophryne nubilosus	meat	pet	trade		research	all
Buergeria oxycephala	meat		trade			all
Buergeria robusta	meat		trade			all
Bufo bankorensis	meat	pet	trade	medicine	research	all
Bufo bufo		pet	trade			all
Bufo gargarizans	meat	pet	trade	medicine	research	all
Bufo gutteralis					research	all
Bufo japonicus		pet	trade			all
Bufo torrenticola		pet	trade			all
Bufotes boulengeri		pet	trade			all
Bufotes luristanicus		pet	trade			all
Bufotes pewzowi				medicine		all
Bufotes viridis		pet	trade			all
Caecilia thompsoni		pet				all
Caecilia volcani				medicine	research	all
Callulops doriae					research	all
Callulops stictogaster						all
Calotriton asper		pet				all
Calyptocephalella gayi		pet	trade			all
Cardioglossa elegans					research	all
Cardioglossa gracilis					research	all
Cardioglossa gratiosa					research	all
Cardioglossa leucomystax					research	all
Cardioglossa melanogaster					research	all
Cardioglossa nigromaculata					research	all
Cardioglossa oreas					research	all
Cardioglossa pulchra					research	all
Cardioglossa schioetzi					research	all
Cardioglossa trifasciata					research	all
Cardioglossa venusta					research	all
Centrolene sanchezi		pet	trade		research	all
Ceratophrys aurita		pet	trade			all
Ceratophrys calcarata		pet	trade			all
Ceratophrys cornuta	meat	pet	trade		research	all
Ceratophrys cranwelli	meat	pet	trade		research	all
Ceratophrys joazeirensis		pet	trade			all
Ceratophrys ornata	meat	pet	trade		research	all
Ceratophrys stolzmanni		pet	trade			all
Chacophrys pierottii		pet	trade			all
Chalcorana chalconota					research	all
Charadrahyla chaneque		pet				all
Charadrahyla taeniopus	meat		trade			all
Chiasmocleis bassleri					research	all
Chiasmocleis hudsoni					research	all
Chioglossa lusitanica		pet			research	all
Chiromantis nongkhorensis	meat	pet	trade		research	all
Chiromantis petersii	meat	pet	trade		research	all
Chiromantis rufescens					research	all
Chiromantis xerampelina		pet	trade			all
Chiromantis�xerampelina	meat	pet	trade		research	all
Choerophryne rostellifer					research	all
Clinotarsus alticola	meat	pet	trade		research	all
Cochranella euknemos		pet				all
Cochranella granulosa		pet	trade		research	all
Colostethus panamensis					research	all
Conraua alleni	meat	pet	trade		research	all
Conraua beccarii						all
Conraua crassipes		pet	trade		research	all
Conraua goliath	meat	pet	trade		research	all
Conraua robusta	meat	pet	trade		research	all
Cophixalus cheesmanae					research	all
Cophixalus verrucosus					research	all
Copiula minor					research	all
Copiula oxyrhina					research	all
Cornufer bufoniformis	meat		trade			all
Cornufer guentheri		pet	trade	medicine	research	all
Cornufer guppyi	meat	pet	trade			all
Cornufer opisthodon	meat		trade			all
Cornufer papuensis					research	all
Cornufer vitiensis						all
Cornufer vogti	meat		trade			all
Craugastor angelicus						all
Craugastor augusti			trade			all
Craugastor bransfordii					research	all
Craugastor crassidigitus					research	all
Craugastor fitzingeri					research	all
Craugastor laticeps					research	all
Craugastor punctariolus					research	all
Craugastor rayo					research	all
Craugastor tabasarae					research	all
Crinia parinsignifera			trade			all
Crinia signifera			trade			all
Cruziohyla calcarifer		pet	trade		research	all
Cruziohyla craspedopus		pet	trade			all
Cruziohyla sylviae		pet				all
Cryptobranchus alleganiensis		pet			research	all
Cryptothylax greshoffii					research	all
Cryptothylax minutus	meat	pet	trade		research	all
Ctenophryne aterrima		pet				all
Cynops chenggongensis		pet	trade			all
Cynops cyanurus		pet	trade		research	all
Cynops ensicauda		pet	trade	medicine	research	all
Cynops fudingensis		pet				all
Cynops orientalis		pet	trade		research	all
Cynops orphicus		pet	trade			all
Cynops pyrrhogaster		pet	trade		research	all
Dendrobates auratus		pet	trade	medicine	research	all
Dendrobates leucomelas		pet	trade		research	all
Dendrobates tinctorius		pet	trade		research	all
Dendrobates truncatus		pet	trade		research	all
Dendropsophus acreanus					research	all
Dendropsophus carnifex					research	all
Dendropsophus columbianus		pet				all
Dendropsophus ebraccatus		pet	trade		research	all
Dendropsophus labialis					research	all
Dendropsophus leali					research	all
Dendropsophus leucophyllatus		pet	trade		research	all
Dendropsophus marmoratus	meat	pet	trade		research	all
Dendropsophus melanargyreus		pet	trade			all
Dendropsophus microcephalus		pet	trade		research	all
Dendropsophus minusculus	meat	pet	trade		research	all
Dendropsophus minutus					research	all
Dendropsophus nanus			trade			all
Dendropsophus parviceps					research	all
Dendropsophus reticulatus		pet				all
Dendropsophus riveroi					research	all
Dendropsophus rossalleni	meat	pet	trade		research	all
Dendropsophus sarayacuensis		pet	trade			all
Dendropsophus seniculus			trade			all
Dendropsophus triangulum		pet	trade			all
Dermatonotus muelleri		pet	trade		research	all
Dermophis mexicanus		pet	trade		research	all
Desmognathus aeneus		pet	trade			all
Desmognathus conanti		pet				all
Desmognathus fuscus		pet	trade		research	all
Desmognathus imitator		pet				all
Desmognathus monticola		pet	trade			all
Desmognathus ocoee		pet				all
Desmognathus orestes		pet				all
Desmognathus organi						all
Desmognathus quadramaculatus		pet	trade			all
Desmognathus wrighti		pet				all
Diasporus diastema					research	all
Dicamptodon aterrimus					research	all
Dicamptodon ensatus					research	all
Dicamptodon tenebrosus		pet				all
Discoglossus pictus		pet			research	all
Discoglossus scovazzi		pet	trade			all
Duttaphrynus himalayanus	meat		trade			all
Duttaphrynus melanostictus	meat	pet	trade	medicine	research	all
Dyscophus antongilii		pet	trade		research	all
Dyscophus guineti		pet	trade		research	all
Dyscophus insularis		pet	trade		research	all
Echinotriton andersoni		pet	trade		research	all
Ecnomiohyla miotympanum	meat		trade			all
Ecnomiohyla valancifer		pet	trade			all
Edalorhina perezi		pet			research	all
Elachistocleis surinamensis					research	all
Eleutherodactylus abbotti					research	all
Eleutherodactylus coqui		pet	trade			all
Eleutherodactylus iberia		pet				all
Eleutherodactylus johnstonei		pet	trade			all
Eleutherodactylus martinicensis		pet				all
Eleutherodactylus montanus					research	all
Eleutherodactylus planirostris		pet	trade		research	all
Engystomops petersi					research	all
Engystomops pustulosus	meat	pet	trade		research	all
Ensatina eschscholtzii					research	all
Epidalea calamita		pet	trade			all
Epipedobates anthonyi		pet	trade	medicine	research	all
Epipedobates boulengeri		pet	trade		research	all
Epipedobates darwinwallacei					research	all
Epipedobates espinosai					research	all
Epipedobates machalilla					research	all
Epipedobates narinensis					research	all
Epipedobates tricolor		pet	trade		research	all
Espadarana prosoblepon		pet	trade			all
Euphlyctis cyanophlyctis	meat		trade			all
Euphlyctis hexadactylus	meat		trade		research	all
Euproctus montanus		pet				all
Euproctus platycephalus		pet	trade		research	all
Eurycea bislineata		pet	trade		research	all
Eurycea cirrigera		pet	trade			all
Eurycea guttolineata		pet	trade			all
Eurycea longicauda		pet	trade			all
Eurycea lucifuga		pet	trade		research	all
Eurycea nana	meat		trade			all
Eurycea quadridigitata			trade			all
Eurycea rathbuni						all
Eurycea wilderae		pet	trade			all
Excidobates captivus		pet	trade		research	all
Excidobates mysteriosus		pet	trade		research	all
Exerodonta catracha			trade			all
Feihyla vittata					research	all
Fejervarya cancrivora	meat		trade		research	all
Fejervarya limnocharis		pet	trade		research	all
Fejervarya triora	meat					all
Fejervarya vittigera	meat		trade			all
Gastrophryne carolinensis		pet	trade			all
Gastrotheca cornuta					research	all
Gastrotheca griswoldi	meat	pet	trade		research	all
Gastrotheca marsupiata		pet	trade		research	all
Gastrotheca monticola		pet	trade			all
Gastrotheca peruana		pet	trade			all
Gastrotheca riobambae		pet	trade			all
Genyophryne thomsoni	meat	pet	trade		research	all
Geocrinia laevis			trade			all
Geotrypetes seraphini		pet	trade		research	all
Glyphoglossus guttulatus	meat	pet	trade			all
Glyphoglossus molossus	meat		trade			all
Grandisonia alternans	meat	pet	trade		research	all
Guibemantis pulcher		pet	trade		research	all
Gymnopis multiplicata		pet	trade			all
Gyrinophilus porphyriticus		pet	trade		research	all
Hamptophryne boliviana		pet	trade			all
Heleioporus australiacus			trade			all
Hemidactylium scutatum					research	all
Hemiphractus fasciatus		pet	trade		research	all
Hemiphractus scutatus	meat	pet	trade		research	all
Hemisus marmoratus	meat	pet	trade		research	all
Herpele multiplicata		pet	trade			all
Herpele squalostoma		pet	trade		research	all
Heterixalus alboguttatus		pet	trade			all
Heterixalus betsileo		pet	trade		research	all
Heterixalus boettgeri		pet	trade		research	all
Heterixalus madagascariensis	meat	pet	trade		research	all
Heterixalus rutenbergi		pet	trade			all
Heterixalus tricolor	meat	pet	trade		research	all
Hildebrandtia ornata		pet	trade			all
Hoplobatrachus crassus	meat		trade			all
Hoplobatrachus occipitalis	meat	pet	trade		research	all
Hoplobatrachus rugulosus	meat	pet	trade		research	all
Hoplobatrachus tigerinus	meat	pet	trade	medicine	research	all
Huia cavitympanum	meat		trade			all
Hyalinobatrachium aureoguttatum		pet	trade			all
Hyalinobatrachium colymbiphyllum					research	all
Hyalinobatrachium fleischmanni		pet	trade		research	all
Hyalinobatrachium petersi		pet				all
Hyalinobatrachium valerioi		pet	trade			all
Hyalinobatrachium vireovittatum					research	all
Hydromantes brunus					research	all
Hydromantes flavus					research	all
Hydromantes genei					research	all
Hydromantes imperialis					research	all
Hydromantes shastae					research	all
Hydromantes supramontis					research	all
Hyla annectans	meat			medicine		all
Hyla arborea	meat	pet	trade		research	all
Hyla arenicolor					research	all
Hyla chinensis		pet	trade		research	all
Hyla chrysoscelis		pet	trade			all
Hyla cinerea	meat	pet	trade		research	all
Hyla femoralis		pet				all
Hyla gratiosa		pet	trade			all
Hyla intermedia			trade			all
Hyla japonica		pet				all
Hyla meridionalis		pet				all
Hyla savignyi		pet	trade			all
Hyla squirella		pet	trade			all
Hyla versicolor		pet	trade		research	all
Hylarana erythraea	meat	pet	trade		research	all
Hylarana montivaga	meat		trade			all
Hylarana taipehensis				medicine	research	all
Hylarana tytleri	meat		trade			all
Hyliola regilla	meat	pet	trade	medicine	research	all
Hylodes phyllodes	meat	pet	trade		research	all
Hylophorbus rufescens					research	all
Hyloscirtus colymba					research	all
Hyloscirtus palmeri	meat	pet	trade		research	all
Hyloxalus azureiventris		pet	trade		research	all
Hymenochirus boettgeri	meat	pet	trade		research	all
Hymenochirus boulengeri	meat	pet	trade		research	all
Hymenochirus curtipes	meat	pet	trade		research	all
Hynobius abei		pet	trade			all
Hynobius amjiensis					research	all
Hynobius boulengeri		pet	trade			all
Hynobius chinensis		pet	trade			all
Hynobius dunni		pet	trade			all
Hynobius fossigenus	meat	pet	trade		research	all
Hynobius hidamontanus		pet	trade			all
Hynobius ikioi	meat		trade	medicine		all
Hynobius kimurae		pet	trade			all
Hynobius leechii		pet				all
Hynobius maoershanensis	meat	pet	trade			all
Hynobius nebulosus		pet	trade			all
Hynobius nigrescens		pet	trade			all
Hynobius retardatus		pet				all
Hynobius tokyoensis		pet	trade			all
Hynobius yiwuensis	meat		trade			all
Hyperolius argus		pet	trade			all
Hyperolius bolifambae		pet	trade		research	all
Hyperolius castaneus					research	all
Hyperolius cinnamomeoventris	meat	pet	trade		research	all
Hyperolius concolor	meat	pet	trade		research	all
Hyperolius fusciventris	meat	pet	trade		research	all
Hyperolius guttulatus		pet	trade		research	all
Hyperolius kivuensis					research	all
Hyperolius langi	meat	pet	trade		research	all
Hyperolius marmoratus		pet	trade		research	all
Hyperolius mitchelli		pet	trade			all
Hyperolius nasutus					research	all
Hyperolius ocellatus					research	all
Hyperolius parkeri		pet	trade			all
Hyperolius phantasticus					research	all
Hyperolius picturatus						all
Hyperolius pictus		pet	trade		research	all
Hyperolius platyceps	meat	pet	trade		research	all
Hyperolius puncticulatus	meat	pet	trade		research	all
Hyperolius riggenbachi	meat	pet	trade		research	all
Hyperolius substriatus		pet	trade			all
Hyperolius thomensis		pet				all
Hyperolius tuberculatus	meat	pet	trade		research	all
Hyperolius tuberilinguis		pet	trade		research	all
Hyperolius viridiflavus		pet	trade		research	all
Hypogeophis rostratus	meat	pet	trade		research	all
Hypopachus variolosus			trade		research	all
Ichthyophis bombayensis		pet	trade		research	all
Ichthyophis glutinosus		pet				all
Ichthyophis kohtaoensis		pet	trade		research	all
Ichthyophis supachaii			trade		research	all
Ichthyosaura alpestris		pet	trade			all
Incilius alvarius		pet	trade			all
Incilius cavifrons			trade			all
Incilius coccifer	meat	pet	trade		research	all
Incilius coniferus		pet	trade		research	all
Incilius epioticus					research	all
Incilius luetkenii	meat	pet	trade		research	all
Incilius marmoreus		pet	trade			all
Incilius melanochlorus		pet	trade		research	all
Incilius periglenes						all
Incilius porteri	meat	pet	trade		research	all
Incilius valliceps		pet	trade	medicine	research	all
Indosylvirana nicobariensis		pet	trade			all
Ingerophrynus biporcatus		pet	trade			all
Ingerophrynus galeatus		pet	trade		research	all
Ingerophrynus parvus		pet				all
Isthmohyla debilis					research	all
Isthmohyla pseudopuma		pet	trade			all
Kalophrynus interlineatus					research	all
Kalophrynus pleurostigma					research	all
Kaloula baleata		pet	trade	medicine	research	all
Kaloula mediolineata	meat		trade			all
Kaloula pulchra	meat	pet	trade	medicine	research	all
Kassina cochranae		pet				all
Kassina decorata		pet	trade			all
Kassina maculosa					research	all
Kassina senegalensis		pet	trade		research	all
Kassina uelensis	meat	pet	trade		research	all
Kurixalus appendiculatus					research	all
Kurixalus bisacculus					research	all
Kurixalus odontotarsus		pet	trade			all
Kurixalus verrucosus			trade			all
Laotriton laoensis	meat	pet	trade	medicine	research	all
Lechriodus melanopyga					research	all
Leiopelma archeyi					research	all
Leiopelma hamiltoni					research	all
Leiopelma hochstetteri					research	all
Lepidobatrachus asper		pet				all
Lepidobatrachus laevis		pet	trade		research	all
Lepidobatrachus llanensis		pet	trade			all
Leptobrachella dringi					research	all
Leptobrachella lateralis					research	all
Leptobrachella pelodytoides	meat	pet	trade		research	all
Leptobrachium boringii	meat	pet	trade			all
Leptobrachium chapaense		pet	trade		research	all
Leptobrachium hainanense	meat		trade			all
Leptobrachium hasseltii		pet	trade	medicine	research	all
Leptobrachium hendricksoni		pet	trade		research	all
Leptobrachium leishanense	meat	pet	trade			all
Leptobrachium mangyanorum	meat		trade			all
Leptobrachium smithi	meat		trade			all
Leptodactylodon bicolor	meat	pet	trade			all
Leptodactylus bolivianus	meat		trade		research	all
Leptodactylus bufonius	meat	pet	trade		research	all
Leptodactylus chaquensis	meat	pet	trade		research	all
Leptodactylus fallax	meat	pet	trade		research	all
Leptodactylus fuscus	meat	pet	trade		research	all
Leptodactylus guianensis	meat	pet	trade		research	all
Leptodactylus knudseni					research	all
Leptodactylus labrosus					research	all
Leptodactylus labyrinthicus	meat		trade			all
Leptodactylus laticeps		pet	trade		research	all
Leptodactylus latrans	meat		trade			all
Leptodactylus melanonotus			trade		research	all
Leptodactylus myersi	meat	pet	trade		research	all
Leptodactylus mystaceus					research	all
Leptodactylus mystacinus					research	all
Leptodactylus pentadactylus	meat	pet	trade		research	all
Leptodactylus petersii	meat	pet	trade		research	all
Leptodactylus poecilochilus					research	all
Leptodactylus rhodomerus	meat		trade			all
Leptodactylus rhodomystax					research	all
Leptodactylus wagneri					research	all
Leptopelis argenteus		pet	trade	medicine	research	all
Leptopelis aubryioides	meat	pet	trade		research	all
Leptopelis bocagii		pet	trade			all
Leptopelis boulengeri		pet	trade			all
Leptopelis brevirostris		pet	trade		research	all
Leptopelis broadleyi		pet	trade			all
Leptopelis calcaratus					research	all
Leptopelis christyi		pet			research	all
Leptopelis cynnamomeus					research	all
Leptopelis fiziensis					research	all
Leptopelis flavomaculatus		pet	trade		research	all
Leptopelis grandiceps		pet			research	all
Leptopelis karissimbensis					research	all
Leptopelis kivuensis					research	all
Leptopelis macrotis		pet	trade			all
Leptopelis mossambicus		pet				all
Leptopelis nordequatorialis		pet	trade			all
Leptopelis notatus	meat		trade	medicine		all
Leptopelis ocellatus	meat	pet	trade		research	all
Leptopelis ragazzii						all
Leptopelis rufus		pet	trade			all
Leptopelis spiritusnoctis		pet	trade			all
Leptopelis uluguruensis		pet	trade		research	all
Leptopelis vermiculatus		pet	trade		research	all
Leptopelis viridis		pet	trade		research	all
Leptophryne cruentata		pet	trade			all
Limnodynastes dumerilii			trade			all
Limnodynastes peronii		pet				all
Limnodynastes salmini			trade			all
Limnodynastes tasmaniensis		pet	trade			all
Limnonectes acanthi	meat		trade			all
Limnonectes blythii	meat		trade		research	all
Limnonectes diuatus	meat		trade			all
Limnonectes fujianensis	meat		trade			all
Limnonectes grunniens	meat		trade			all
Limnonectes gyldenstolpei	meat		trade	medicine	research	all
Limnonectes heinrichi	meat		trade			all
Limnonectes ibanorum	meat		trade			all
Limnonectes ingeri	meat		trade			all
Limnonectes isanensis	meat		trade			all
Limnonectes kuhlii	meat		trade		research	all
Limnonectes leporinus	meat		trade			all
Limnonectes leytensis	meat		trade			all
Limnonectes macrocephalus	meat		trade			all
Limnonectes macrodon	meat	pet	trade	medicine	research	all
Limnonectes macrognathus	meat					all
Limnonectes magnus	meat		trade			all
Limnonectes malesianus	meat	pet	trade			all
Limnonectes microtympanum	meat		trade			all
Limnonectes poilani	meat		trade			all
Limnonectes shompenorum	meat		trade			all
Limnonectes taylori	meat		trade			all
Limnonectes visayanus	meat		trade			all
Limnonectes woodworthi	meat		trade			all
Lissotriton boscai		pet	trade			all
Lissotriton helveticus		pet	trade			all
Lissotriton italicus		pet	trade			all
Lissotriton montandoni		pet	trade			all
Lissotriton vulgaris		pet	trade			all
Lithodytes lineatus	meat	pet	trade		research	all
Litoria aurea	meat	pet	trade			all
Litoria bicolor			trade			all
Litoria caerulea	meat	pet	trade	medicine	research	all
Litoria chloris		pet	trade			all
Litoria citropa			trade			all
Litoria eucnemis					research	all
Litoria ewingii		pet	trade			all
Litoria exophthalmia			trade			all
Litoria fallax		pet	trade			all
Litoria gilleni			trade			all
Litoria gracilenta			trade			all
Litoria graminea					research	all
Litoria infrafrenata		pet	trade	medicine	research	all
Litoria lesueurii			trade			all
Litoria moorei			trade			all
Litoria nasuta		pet	trade			all
Litoria nigropunctata					research	all
Litoria peronii			trade			all
Litoria phyllochroa			trade			all
Litoria quadrilineata		pet	trade			all
Litoria raniformis		pet	trade			all
Litoria rothii			trade			all
Litoria rubella		pet	trade	medicine	research	all
Litoria splendida						all
Litoria thesaurensis		pet	trade			all
Litoria tyleri			trade			all
Litoria verreauxii			trade			all
Litoria xanthomera			trade			all
Liua shihi	meat	pet	trade			all
Liua tsinpaensis				medicine		all
Lyciasalamandra helverseni		pet	trade			all
Lysapsus laevis	meat	pet	trade		research	all
Mantella aurantiaca	meat	pet	trade	medicine	research	all
Mantella baroni	meat	pet	trade			all
Mantella bernhardi		pet	trade		research	all
Mantella betsileo	meat	pet	trade			all
Mantella cowanii		pet	trade		research	all
Mantella crocea	meat	pet	trade		research	all
Mantella ebenaui		pet	trade		research	all
Mantella expectata		pet	trade		research	all
Mantella haraldmeieri		pet	trade		research	all
Mantella laevigata	meat	pet	trade		research	all
Mantella madagascariensis	meat	pet	trade		research	all
Mantella manery					research	all
Mantella milotympanum	meat	pet	trade		research	all
Mantella nigricans		pet	trade		research	all
Mantella pulchra	meat	pet	trade		research	all
Mantella viridis	meat	pet	trade		research	all
Mantidactylus grandidieri	meat		trade			all
Mantidactylus guttulatus	meat		trade			all
Mantidactylus lugubris		pet				all
Mantophryne lateralis					research	all
Megophrys montana		pet	trade		research	all
Melanophryniscus admirabilis		pet	trade			all
Melanophryniscus atroluteus		pet	trade			all
Melanophryniscus cambaraensis		pet	trade			all
Melanophryniscus fulvoguttatus		pet	trade			all
Melanophryniscus klappenbachi		pet	trade			all
Melanophryniscus stelzneri		pet	trade		research	all
Melanophryniscus tumifrons		pet	trade			all
Meristogenys kinabaluensis	meat		trade			all
Meristogenys orphnocnemis	meat		trade			all
Mertensiella caucasica		pet	trade			all
Microhyla berdmorei					research	all
Microhyla butleri		pet	trade			all
Microhyla fissipes	meat	pet	trade		research	all
Microhyla heymonsi	meat	pet	trade		research	all
Microhyla mixtura		pet	trade			all
Microhyla ornata		pet			research	all
Microhyla pulchra	meat	pet	trade		research	all
Micryletta inornata					research	all
Minervarya agricola		pet	trade			all
Minervarya nepalensis	meat		trade	medicine		all
Minervarya teraiensis	meat		trade			all
Minyobates steyermarki		pet	trade			all
Mixophyes fasciolatus			trade			all
Mixophyes iteratus			trade			all
Nannophryne cophotis		pet	trade			all
Nannophryne variegata		pet	trade			all
Nanorana arnoldi	meat		trade			all
Nanorana maculosa	meat		trade			all
Nanorana medogensis	meat		trade			all
Nanorana quadranus	meat		trade	medicine		all
Nanorana unculuanus	meat		trade			all
Nanorana yunnanensis	meat		trade			all
Nectophryne afra					research	all
Nectophryne batesii					research	all
Nectophrynoides asperginis					research	all
Nectophrynoides cryptus					research	all
Nectophrynoides minutus					research	all
Nectophrynoides tornieri		pet	trade		research	all
Nectophrynoides viviparus					research	all
Necturus alabamensis		pet				all
Necturus beyeri		pet	trade			all
Necturus maculosus		pet	trade	medicine	research	all
Necturus punctatus		pet				all
Neobatrachus sudellae			trade			all
Neurergus barani		pet				all
Neurergus crocatus		pet	trade			all
Neurergus derjugini		pet	trade		research	all
Neurergus kaiseri		pet	trade		research	all
Neurergus strauchii		pet	trade			all
Nidirana chapaensis	meat		trade			all
Nidirana lini	meat		trade			all
Nidirana pleuraden	meat		trade			all
Nimbaphrynoides occidentalis					research	all
Notophthalmus perstriatus		pet	trade			all
Notophthalmus viridescens		pet	trade	medicine	research	all
Nyctimystes disruptus	meat		trade			all
Nyctimystes trachydermis	meat		trade			all
Nyctixalus pictus		pet	trade		research	all
Occidozyga laevis		pet				all
Occidozyga lima	meat	pet	trade	medicine	research	all
Occidozyga martensii						all
Odontophrynus americanus		pet	trade			all
Odorrana absita	meat					all
Odorrana andersonii	meat		trade			all
Odorrana bacboensis	meat		trade			all
Odorrana banaorum	meat		trade			all
Odorrana chapaensis					research	all
Odorrana chloronota					research	all
Odorrana grahami	meat		trade			all
Odorrana hejiangensis	meat		trade	medicine		all
Odorrana hosii		pet			research	all
Odorrana indeprensa	meat					all
Odorrana ishikawae		pet	trade			all
Odorrana jingdongensis	meat		trade			all
Odorrana kuangwuensis	meat		trade			all
Odorrana kweichowensis	meat		trade	medicine		all
Odorrana livida		pet	trade		research	all
Odorrana macrotympana	meat		trade			all
Odorrana morafkai	meat		trade			all
Odorrana nanjiangensis	meat		trade			all
Odorrana rotodora					research	all
Odorrana schmackeri	meat		trade			all
Odorrana splendida		pet	trade			all
Odorrana swinhoana	meat		trade			all
Odorrana tiannanensis	meat		trade			all
Odorrana wuchuanensis	meat		trade			all
Oedipina taylori	meat	pet	trade		research	all
Ommatotriton nesterovi		pet				all
Ommatotriton ophryticus		pet	trade			all
Ommatotriton vittatus		pet	trade			all
Onychodactylus japonicus		pet	trade		research	all
Oophaga anchicayensis		pet	trade			all
Oophaga arborea			trade			all
Oophaga granulifera		pet	trade		research	all
Oophaga histrionica		pet	trade		research	all
Oophaga lehmanni		pet	trade		research	all
Oophaga pumilio		pet	trade	medicine	research	all
Oophaga solanensis		pet	trade			all
Oophaga speciosa		pet	trade			all
Oophaga sylvatica	meat	pet	trade		research	all
Oophaga vicentei		pet	trade		research	all
Oophaga�andresii		pet	trade			all
Ophryophryne koui					research	all
Ophryophryne microstoma					research	all
Oreobates quixensis		pet	trade			all
Oreolalax jingdongensis	meat		trade			all
Oreolalax major	meat		trade	medicine		all
Oreolalax multipunctatus	meat		trade	medicine		all
Oreolalax omeimontis	meat		trade	medicine		all
Oreolalax popei	meat		trade	medicine		all
Oreolalax rhodostigmatus	meat		trade			all
Oreophryne brevicrus					research	all
Osteocephalus leprieurii					research	all
Osteocephalus taurinus		pet			research	all
Osteopilus septentrionalis	meat	pet	trade			all
Osteopilus vastus	meat	pet	trade			all
Pachyhynobius shangchengensis	meat	pet	trade			all
Pachytriton brevipes	meat	pet	trade		research	all
Pachytriton inexpectatus		pet	trade	medicine		all
Pachytriton wuguanfui		pet	trade			all
Paedophryne swiftorum	meat	pet	trade		research	all
Panophrys caudoprocta	meat		trade			all
Papurana arfaki	meat		trade		research	all
Papurana daemeli	meat		trade			all
Papurana garritor	meat		trade		research	all
Papurana jimiensis	meat		trade			all
Paracrinia haswelli			trade			all
Paramesotriton caudopunctatus		pet	trade	medicine		all
Paramesotriton chinensis		pet	trade		research	all
Paramesotriton deloustali		pet	trade	medicine	research	all
Paramesotriton fuzhongensis		pet	trade			all
Paramesotriton hongkongensis	meat	pet	trade		research	all
Paramesotriton labiatus	meat	pet	trade		research	all
Paramesotriton longliensis		pet	trade			all
Paramesotriton zhijinensis		pet	trade			all
Pelobates cultripes		pet				all
Pelobates fuscus		pet	trade		research	all
Pelobatrachus nasuta	meat	pet	trade	medicine	research	all
Pelobatrachus stejnegeri		pet	trade			all
Pelodytes punctatus		pet	trade			all
Pelophylax bedriagae	meat		trade			all
Pelophylax caralitanus	meat		trade			all
Pelophylax epeiroticus	meat		trade			all
Pelophylax esculentus		pet				all
Pelophylax fukienensis	meat		trade			all
Pelophylax grafi		pet				all
Pelophylax kurtmuelleri	meat		trade			all
Pelophylax lateralis	meat		trade			all
Pelophylax lessonae	meat	pet	trade			all
Pelophylax nigromaculatus	meat		trade			all
Pelophylax perezi	meat		trade			all
Pelophylax plancyi	meat		trade			all
Pelophylax ridibundus	meat	pet	trade	medicine	research	all
Pelophylax saharicus			trade		research	all
Pelophylax shqipericus	meat		trade			all
Pelophylax tenggerensis	meat		trade			all
Peltophryne lemur	meat		trade		research	all
Peltophryne peltocephala		pet				all
Petropedetes johnstoni					research	all
Philautus petersi					research	all
Philautus tectus					research	all
Phlyctimantis boulengeri	meat	pet	trade		research	all
Phlyctimantis leonardi					research	all
Phlyctimantis maculatus		pet	trade	medicine	research	all
Phlyctimantis verrucosus					research	all
Phrynobatrachus accraensis					research	all
Phrynobatrachus acridioides		pet	trade		research	all
Phrynobatrachus albomarginatus	meat	pet	trade		research	all
Phrynobatrachus asper	meat		trade		research	all
Phrynobatrachus auritus	meat	pet	trade		research	all
Phrynobatrachus calcaratus					research	all
Phrynobatrachus krefftii					research	all
Phrynobatrachus latifrons	meat	pet	trade		research	all
Phrynobatrachus mababiensis					research	all
Phrynobatrachus minutus						all
Phrynobatrachus natalensis	meat	pet	trade		research	all
Phrynobatrachus parkeri	meat	pet	trade		research	all
Phrynobatrachus parvulus					research	all
Phrynobatrachus plicatus						all
Phrynobatrachus ukingensis					research	all
Phrynoidis aspera	meat	pet	trade	medicine		all
Phrynoidis juxtasper	meat		trade			all
Phrynomantis annectans	meat	pet	trade		research	all
Phrynomantis bifasciatus	meat	pet	trade		research	all
Phrynomantis microps		pet	trade			all
Phrynopus juninensis	meat	pet	trade		research	all
Phyllobates aurotaenia		pet	trade		research	all
Phyllobates bicolor		pet	trade		research	all
Phyllobates lugubris		pet	trade		research	all
Phyllobates terribilis	meat	pet	trade	medicine	research	all
Phyllobates vittatus		pet	trade		research	all
Phyllomedusa atelopoides					research	all
Phyllomedusa azurea		pet	trade		research	all
Phyllomedusa bicolor	meat	pet	trade		research	all
Phyllomedusa boliviana		pet				all
Phyllomedusa burmeisteri		pet	trade			all
Phyllomedusa ecuatoriana		pet				all
Phyllomedusa hypochondrialis		pet	trade			all
Phyllomedusa iheringii		pet	trade			all
Phyllomedusa sauvagii		pet	trade		research	all
Phyllomedusa tarsius		pet				all
Phyllomedusa tetraploidea		pet	trade		research	all
Phyllomedusa tomopterna		pet	trade		research	all
Phyllomedusa trinitatis		pet	trade			all
Phyllomedusa vaillantii		pet	trade		research	all
Physalaemus biligonigerus		pet	trade			all
Physalaemus cuvieri	meat	pet	trade		research	all
Physalaemus nattereri	meat	pet	trade		research	all
Pipa carvalhoi		pet	trade			all
Pipa parva		pet	trade			all
Pipa pipa		pet	trade	medicine	research	all
Pipa snethlageae		pet	trade			all
Platymantis guentheri		pet	trade			all
Platypelis milloti	meat	pet	trade		research	all
Plectrohyla dasypus		pet	trade			all
Plectrohyla exquisita		pet	trade			all
Plectrohyla ixil					research	all
Plethodon chlorobryonis						all
Plethodon cinereus		pet	trade		research	all
Plethodon dorsalis		pet	trade			all
Plethodon elongatus		pet				all
Plethodon glutinosus		pet	trade			all
Plethodon idahoensis		pet	trade			all
Plethodon jordani		pet			research	all
Plethodon larselli					research	all
Plethodon metcalfi		pet				all
Plethodon montanus		pet				all
Plethodon neomexicanus			trade			all
Plethodon petraeus		pet	trade			all
Plethodon shermani		pet				all
Plethodon teyahalee		pet	trade			all
Plethodon vehiculum		pet				all
Plethodon yonahlossee					research	all
Plethodontohyla tuberata			trade			all
Pleurodeles nebulosus						all
Pleurodeles poireti					research	all
Pleurodeles waltl		pet	trade		research	all
Pleurodema brachyops		pet	trade		research	all
Polypedates colletti		pet			research	all
Polypedates leucomystax	meat	pet	trade	medicine	research	all
Polypedates megacephalus		pet				all
Polypedates otilophus		pet	trade		research	all
Polypedates pseudotilophus		pet	trade			all
Polypedates teraiensis		pet				all
Potamotyphlus kaupii		pet	trade			all
Pristimantis altamazonicus			trade			all
Pristimantis bipunctatus	meat	pet	trade		research	all
Pristimantis cerasinus	meat	pet	trade		research	all
Pristimantis conspicillatus	meat	pet	trade		research	all
Pristimantis cruciocularis	meat	pet	trade		research	all
Pristimantis cruentus					research	all
Pristimantis lanthanites	meat	pet	trade		research	all
Pristimantis lirellus	meat	pet	trade		research	all
Pristimantis minutulus	meat	pet	trade		research	all
Pristimantis muscosus					research	all
Pristimantis peruvianus	meat	pet	trade		research	all
Pristimantis pharangobates	meat	pet	trade		research	all
Pristimantis platydactylus	meat	pet	trade		research	all
Pristimantis sagittulus	meat	pet	trade		research	all
Proceratophrys boiei		pet	trade			all
Proteus anguinus		pet	trade		research	all
Pseudacris crucifer		pet	trade		research	all
Pseudacris streckeri					research	all
Pseudacris triseriata					research	all
Pseudhymenochirus merlini	meat	pet	trade			all
Pseudis paradoxa		pet	trade		research	all
Pseudobranchus striatus		pet	trade			all
Pseudobufo subasper	meat	pet	trade	medicine		all
Pseudohynobius shuichengensis	meat	pet	trade			all
Pseudopaludicola mystacalis					research	all
Pseudophilautus auratus		pet				all
Pseudophryne semimarmorata			trade			all
Pseudotriton montanus		pet				all
Pseudotriton ruber		pet	trade		research	all
Psychrophrynella usurpator	meat	pet	trade		research	all
Ptychadena anchietae		pet	trade		research	all
Ptychadena bobita	meat	pet	trade		research	all
Ptychadena christyi	meat	pet	trade		research	all
Ptychadena erlangeri					research	all
Ptychadena kisangani	meat	pet	trade		research	all
Ptychadena mascareniensis	meat	pet	trade		research	all
Ptychadena neumanni						all
Ptychadena oxyrhynchus	meat	pet	trade		research	all
Ptychadena superciliaris	meat		trade			all
Ptychohyla hypomykter					research	all
Pulchrana picturata		pet				all
Pulchrana signata		pet	trade			all
Pyxicephalus adspersus	meat	pet	trade		research	all
Pyxicephalus angusticeps	meat	pet	trade			all
Pyxicephalus edulis	meat	pet	trade		research	all
Quasipaa boulengeri	meat		trade			all
Quasipaa courtoisi						all
Quasipaa delacouri	meat		trade			all
Quasipaa exilispinosa	meat		trade			all
Quasipaa fasciculispina	meat	pet	trade	medicine		all
Quasipaa jiulongensis	meat		trade			all
Quasipaa shini	meat		trade			all
Quasipaa spinosa	meat	pet	trade			all
Quasipaa verrucospinosa	meat		trade			all
Quasipaa yei	meat		trade			all
Rana amurensis	meat		trade			all
Rana arvalis						all
Rana aurora		pet	trade		research	all
Rana berlandieri	meat		trade	medicine	research	all
Rana brownorum	meat		trade			all
Rana capito	meat		trade			all
Rana catesbeiana	meat	pet	trade		research	all
Rana chensinensis	meat		trade	medicine	research	all
Rana chiricahuensis					research	all
Rana clamitans	meat	pet	trade	medicine	research	all
Rana dunni	meat		trade			all
Rana dybowskii				medicine		all
Rana forreri	meat		trade	medicine	research	all
Rana grylio	meat		trade			all
Rana heckscheri						all
Rana huanrensis	meat		trade	medicine		all
Rana latastei	meat		trade		research	all
Rana luanchuanensis	meat		trade			all
Rana macrocnemis		pet	trade		research	all
Rana magnaocularis					research	all
Rana megapoda	meat		trade			all
Rana montezumae	meat		trade			all
Rana palustris					research	all
Rana pipiens	meat	pet	trade	medicine	research	all
Rana psilonota	meat		trade			all
Rana spectabilis	meat		trade			all
Rana sphenocephala			trade			all
Rana sylvatica			trade	medicine	research	all
Rana tarahumarae					research	all
Rana temporaria	meat	pet	trade	medicine	research	all
Rana vibicaria						all
Rana warszewitschii					research	all
Rana yavapaiensis					research	all
Ranitomeya amazonica		pet	trade		research	all
Ranitomeya benedicta		pet	trade		research	all
Ranitomeya cyanovittata					research	all
Ranitomeya defleri					research	all
Ranitomeya fantastica		pet	trade		research	all
Ranitomeya flavovittata		pet	trade		research	all
Ranitomeya imitator		pet	trade		research	all
Ranitomeya reticulata		pet	trade		research	all
Ranitomeya sirensis		pet	trade		research	all
Ranitomeya summersi		pet	trade		research	all
Ranitomeya toraro					research	all
Ranitomeya uakarii		pet	trade		research	all
Ranitomeya vanzolinii		pet	trade		research	all
Ranitomeya variabilis		pet	trade		research	all
Ranitomeya ventrimaculata		pet	trade		research	all
Ranitomeya yavaricola					research	all
Ranodon sibiricus	meat		trade	medicine		all
Rentapia hosii		pet	trade		research	all
Rhacophorus annamensis		pet	trade		research	all
Rhacophorus bipunctatus	meat	pet	trade	medicine		all
Rhacophorus calcaneus		pet	trade		research	all
Rhacophorus exechopygus		pet	trade			all
Rhacophorus helenae	meat	pet	trade		research	all
Rhacophorus kio		pet	trade			all
Rhacophorus margaritifer		pet	trade			all
Rhacophorus nigropalmatus		pet	trade		research	all
Rhacophorus orlovi		pet	trade			all
Rhacophorus pardalis		pet	trade		research	all
Rhacophorus reinwardtii	meat	pet	trade	medicine	research	all
Rhacophorus rhodopus					research	all
Rhaebo blombergi	meat	pet	trade			all
Rhaebo guttatus		pet	trade		research	all
Rhaebo haematiticus		pet	trade			all
Rhinatrema bivittatum					research	all
Rhinella arenarum		pet				all
Rhinella atacamensis		pet	trade			all
Rhinella diptycha			trade			all
Rhinella granulosa	meat	pet	trade		research	all
Rhinella humboldti						all
Rhinella icterica		pet	trade			all
Rhinella lescurei	meat	pet	trade		research	all
Rhinella margaritifera	meat	pet	trade		research	all
Rhinella marina	meat	pet	trade	medicine	research	all
Rhinella martyi	meat	pet	trade		research	all
Rhinella pygmaea		pet				all
Rhinella rubescens		pet				all
Rhinella rubropunctata		pet				all
Rhinella schneideri		pet	trade		research	all
Rhinella sclerocephala				medicine		all
Rhinella spinulosa	meat	pet	trade	medicine		all
Rhinoderma darwinii		pet			research	all
Rhinophrynus dorsalis		pet	trade		research	all
Rhyacotriton olympicus					research	all
Sachatamia albomaculata	meat	pet	trade		research	all
Sachatamia ilex					research	all
Salamandra algira		pet	trade			all
Salamandra atra		pet	trade			all
Salamandra corsica		pet	trade			all
Salamandra infraimmaculata		pet	trade			all
Salamandra lanzai		pet				all
Salamandra salamandra		pet	trade		research	all
Salamandrella keyserlingii		pet	trade			all
Salamandrina perspicillata		pet	trade			all
Salamandrina terdigitata		pet				all
Sanguirana aurantipunctata	meat		trade			all
Scaphiophryne boribory		pet				all
Scaphiophryne brevis		pet	trade			all
Scaphiophryne calcarata	meat	pet	trade		research	all
Scaphiophryne gottlebei		pet	trade		research	all
Scaphiophryne madagascariensis	meat	pet	trade		research	all
Scaphiophryne marmorata		pet	trade		research	all
Scaphiophryne obscura		pet				all
Scaphiophryne spinosa		pet	trade			all
Scaphiophryne verrucosa		pet	trade			all
Scaphiopus couchii		pet	trade		research	all
Scaphiopus holbrookii	meat	pet	trade		research	all
Schismaderma carens		pet	trade		research	all
Schistometopum gregorii	meat	pet	trade		research	all
Schistometopum thomense		pet	trade			all
Scinax boesemani					research	all
Scinax cruentommus						all
Scinax funereus					research	all
Scinax garbei					research	all
Scinax perpusillus					research	all
Scinax ruber					research	all
Scinax staufferi	meat	pet	trade		research	all
Scinax x-signatus	meat	pet	trade		research	all
Sclerophrys camerunensis					research	all
Sclerophrys funerea					research	all
Sclerophrys garmani	meat	pet	trade		research	all
Sclerophrys gutturalis	meat	pet	trade		research	all
Sclerophrys kisoloensis					research	all
Sclerophrys maculata	meat		trade		research	all
Sclerophrys mauritanica	meat	pet	trade			all
Sclerophrys pardalis		pet	trade			all
Sclerophrys regularis	meat	pet	trade	medicine	research	all
Sclerophrys superciliaris		pet			research	all
Sclerophrys togoensis				medicine		all
Sclerophrys tuberosa		pet				all
Scolecomorphus kirkii		pet	trade			all
Scotobleps gabonicus					research	all
Scutiger glandulatus					research	all
Siphonops annulatus		pet				all
Siren intermedia		pet	trade		research	all
Siren lacertina		pet	trade			all
Smilisca baudinii	meat	pet	trade	medicine	research	all
Smilisca phaeota	meat	pet	trade		research	all
Smilisca sordida					research	all
Spea multiplicata		pet	trade		research	all
Sphaenorhynchus lacteus	meat	pet	trade		research	all
Sphaerotheca breviceps					research	all
Sphaerotheca dobsonii					research	all
Sphenophryne cornuta					research	all
Stefania evansi					research	all
Strabomantis biporcatus					research	all
Strabomantis bufoniformis					research	all
Strauchbufo raddei		pet		medicine		all
Strongylopus fasciatus		pet	trade			all
Sylvirana cubitalis		pet				all
Sylvirana guentheri	meat	pet	trade			all
Taricha granulosa		pet	trade		research	all
Taricha rivularis		pet	trade			all
Taricha torosa		pet	trade		research	all
Telmatobius arequipensis	meat		trade	medicine		all
Telmatobius atahualpai	meat		trade	medicine		all
Telmatobius brevirostris	meat		trade	medicine		all
Telmatobius carrillae	meat		trade	medicine		all
Telmatobius cirrhacelis	meat		trade			all
Telmatobius culeus	meat	pet	trade		research	all
Telmatobius gigas				medicine		all
Telmatobius hockingi	meat		trade	medicine		all
Telmatobius jelskii	meat		trade			all
Telmatobius macrostomus	meat		trade			all
Telmatobius marmoratus	meat		trade	medicine	research	all
Telmatobius mayoloi	meat		trade	medicine		all
Telmatobius niger	meat		trade			all
Telmatobius peruvianus	meat		trade	medicine		all
Telmatobius punctatus	meat	pet	trade			all
Telmatobius rimac	meat		trade	medicine		all
Telmatobius truebae	meat		trade	medicine		all
Telmatobius vellardi	meat		trade			all
Telmatobius ventriflavum	meat		trade	medicine		all
Telmatobius verrucosus					research	all
Teratohyla pulverata		pet	trade			all
Theloderma albopunctatum		pet	trade			all
Theloderma asperum		pet	trade		research	all
Theloderma auratum		pet				all
Theloderma bicolor		pet	trade			all
Theloderma corticale		pet	trade		research	all
Theloderma gordoni		pet	trade			all
Theloderma horridum		pet	trade			all
Theloderma laeve		pet				all
Theloderma lateriticum		pet	trade			all
Theloderma leporosum		pet	trade			all
Theloderma licin		pet	trade			all
Theloderma nebulosum		pet	trade			all
Theloderma palliatum		pet	trade			all
Theloderma ryabovi		pet	trade			all
Theloderma stellatum		pet	trade		research	all
Theloderma vietnamense		pet	trade			all
Tlalocohyla loquax		pet	trade	medicine	research	all
Tomopterna cryptotis		pet	trade		research	all
Tomopterna luganga		pet	trade			all
Tomopterna marmorata					research	all
Trachycephalus coriaceus	meat	pet	trade			all
Trachycephalus hadroceps		pet				all
Trachycephalus jordani	meat					all
Trachycephalus nigromaculatus		pet	trade			all
Trachycephalus resinifictrix	meat	pet	trade		research	all
Trachycephalus typhonius	meat	pet	trade	medicine	research	all
Trichobatrachus robustus	meat	pet	trade		research	all
Triprion petasatus		pet	trade		research	all
Triturus carnifex		pet	trade			all
Triturus cristatus		pet	trade			all
Triturus dobrogicus		pet	trade			all
Triturus karelinii		pet	trade			all
Triturus macedonicus		pet				all
Triturus marmoratus		pet	trade		research	all
Triturus pygmaeus		pet	trade			all
Tylototriton anguliceps		pet	trade	medicine		all
Tylototriton asperrimus		pet	trade	medicine		all
Tylototriton dabienicus		pet	trade			all
Tylototriton kweichowensis		pet	trade	medicine		all
Tylototriton lizhengchangi		pet	trade			all
Tylototriton notialis		pet	trade	medicine		all
Tylototriton podichthys		pet	trade	medicine		all
Tylototriton pseudoverrucosus				medicine		all
Tylototriton shanjing		pet	trade	medicine	research	all
Tylototriton shanorum		pet	trade			all
Tylototriton taliangensis		pet	trade	medicine		all
Tylototriton verrucosus		pet	trade	medicine	research	all
Tylototriton vietnamensis		pet	trade	medicine		all
Tylototriton wenxianensis		pet	trade	medicine		all
Tylototriton yangi		pet	trade	medicine		all
Tylototriton ziegleri		pet	trade			all
Typhlonectes compressicauda		pet				all
Typhlonectes natans		pet	trade		research	all
Vandijkophrynus robinsoni		pet	trade			all
Xenophrys aceras		pet				all
Xenophrys longipes	meat	pet	trade		research	all
Xenophrys parva		pet	trade		research	all
Xenopus amieti	meat	pet	trade		research	all
Xenopus andrei	meat		trade			all
Xenopus clivii	meat	pet	trade		research	all
Xenopus epitropicalis					research	all
Xenopus fraseri	meat	pet	trade			all
Xenopus gilli						all
Xenopus laevis	meat	pet	trade	medicine	research	all
Xenopus longipes					research	all
Xenopus muelleri	meat	pet	trade		research	all
Xenopus petersii	meat		trade			all
Xenopus pygmaeus	meat	pet	trade		research	all
Xenopus ruwenzoriensis	meat		trade			all
Xenopus tropicalis	meat	pet	trade		research	all
Xenopus vestitus	meat		trade			all
Xenopus wittei	meat		trade			all
Zhangixalus arboreus		pet	trade			all
Zhangixalus dennysi		pet	trade		research	all
Zhangixalus feae	meat	pet	trade			all
Zhangixalus prominanus		pet	trade		research	all
Zhangixalus smaragdinus		pet	trade			all
Sclerophrys pantherina		pet				all	German_list
Leptobrachium guangxiense		pet				all	onlinelist
Microhyla annamensis		pet				all	onlinelist
Rhacophorus norhayatii		pet				all	onlinelist
Staurois guttatus		pet				all	onlinelist
Theloderma rhododiscus		pet				all	onlinelist
