# Supplementary material for: Gaps in global wildlife trade monitoring leave amphibians vulnerable
Source: eLife. 2021 Aug 12;10:e70086. doi: 10.7554/eLife.70086 (PMC8425949; doi:10.7554/eLife.70086)
Supplement: Source data 6. [file elife-70086-data6.csv]

Keyword	category	LiveDead
Laboratory	Medicinal and pharmaceutical	Dead
Laboratoire	Medicinal and pharmaceutical	Dead
pharmaceuticals	Medicinal and pharmaceutical	Dead
scientific	Medicinal and pharmaceutical	Dead
sciences	Medicinal and pharmaceutical	Dead
frozen	food	Dead
food	food	Dead
fisheries	food	Dead
agricultural	food	Dead
flavour	food	Dead
seafood	food	Dead
specimen	research	Dead
museum	research	Dead
institute	research	Dead
zoological	research	Dead
frozen	food	Live
food	food	Live
fisheries	food	Live
agricultural	food	Live
flavour	food	Live
pet	pet	Live
tropical	pet	Live
birds	pet	Live
vivarium	pet	Live
exotics	pet	Live
Laboratory	Medicinal and pharmaceutical	Live
Laboratoire	Medicinal and pharmaceutical	Live
pharmaceuticals	Medicinal and pharmaceutical	Live
scientific	Medicinal and pharmaceutical	Live
sciences	Medicinal and pharmaceutical	Live
Prada * (a number of other brands, especially Italian brands such as Gucci were also listed)	Commercial (Fashion)	Live
Crafts	Commercial (Fashion)	Live
accessories	Commercial (Fashion)	Live
hides	Commercial (Fashion)	Live
bait	Commercial (bait)	Live
museum	research	Live
institute	research	Live
zoological	research	Live
