# Supplementary material for: Gaps in global wildlife trade monitoring leave amphibians vulnerable
Source: eLife. 2021 Aug 12;10:e70086. doi: 10.7554/eLife.70086 (PMC8425949; doi:10.7554/eLife.70086)
Supplement: Source data 7. [file elife-70086-data7.csv]

control_number	species_code	taxa	class	genus	species	subspecies	specific_name	generic_name	description	quantity	unit	value	country_origin	country_imp_exp	purpose	source	action	disposition	disposition_date	disposition_year	shipment_date	shipment_year	import_export	port	us_co	foreign_co	cleaning_notes	lemisName	amphiName
2000731968	HYMC	amphibian	Amphibia	Hymenochirus	curtipes	NA	W. DWARF CLAWED	FROG	LIV	200	NO	40	HK	HK	T	W	C	C	2000-01-03	2000	2000-01-01	2000	I	NY	ERDA INC.	BROTHER AQUARIUM	NA	Hymenochirus curtipes	Hymenochirus curtipes
2000761530	CYPY	amphibian	Amphibia	Cynops	pyrrhogaster	NA	JAPANESE FIREBELLY	NEWT	LIV	50	NO	6	HK	HK	T	W	C	C	2000-01-04	2000	2000-01-01	2000	I	NY	BOZMAN IMPORTS LTD.	UNION TROPICAL FISH FARM	NA	Cynops pyrrhogaster	Cynops pyrrhogaster
2000761530	XELA	amphibian	Amphibia	Xenopus	laevis	NA	AFRICAN CLAWED	TOAD	LIV	875	NO	131	HK	HK	T	W	C	C	2000-01-04	2000	2000-01-01	2000	I	NY	BOZMAN IMPORTS LTD.	UNION TROPICAL FISH FARM	NA	Xenopus laevis	Xenopus laevis
2000695680	RACA	amphibian	Amphibia	Rana	catesbeiana	NA	NA	BULLFROG	LIV	5000	NO	364	DO	DO	T	W	C	C	2000-01-06	2000	2000-01-02	2000	I	NW	KIN YICK TRADING CORPORATION	EXPORTADORA GONZALEZ	Original value in 'species' column: catesbeinana	Rana catesbeiana	Rana catesbeiana
2000720963	HYMC	amphibian	Amphibia	Hymenochirus	curtipes	NA	W. DWARF CLAWED	FROG	LIV	2950	NO	1180	SG	SG	T	W	C	C	2000-01-02	2000	2000-01-02	2000	I	LA	AQUA-NAUTIC SPECIALIST	AQUANAUTICS SPECIALIST PTE LIMITED	NA	Hymenochirus curtipes	Hymenochirus curtipes
2000721114	BUME	amphibian	Amphibia	Bufo	melanostictus	NA	BLACK-SPINED	TOAD	LIV	144	NO	58	VN	VN	T	W	C	C	2000-01-02	2000	2000-01-02	2000	I	LA	UNIVERSAL AQUATIC	CORIMEX	NA	Bufo melanostictus	Duttaphrynus melanostictus
2000721114	KALO	amphibian	Amphibia	Kaloula	pulchra	NA	ASIATIC PAINTED	FROG	LIV	260	NO	104	VN	VN	T	W	C	C	2000-01-02	2000	2000-01-02	2000	I	LA	UNIVERSAL AQUATIC	CORIMEX	NA	Kaloula pulchra	Kaloula pulchra
2000721114	RLEU	amphibian	Amphibia	Rhacophorus	leucomystax	NA	FLYING	FROG	LIV	70	NO	28	VN	VN	T	W	C	C	2000-01-02	2000	2000-01-02	2000	I	LA	UNIVERSAL AQUATIC	CORIMEX	NA	Rhacophorus leucomystax	NA
2000723046	HYMC	amphibian	Amphibia	Hymenochirus	curtipes	NA	W. DWARF CLAWED	FROG	LIV	300	NO	24	ID	ID	T	W	C	C	2000-01-02	2000	2000-01-02	2000	I	LA	DOLPHIN INTERNATIONAL	PT VIVARIA INDONESIA	NA	Hymenochirus curtipes	Hymenochirus curtipes
2000723046	LICA	amphibian	Amphibia	Litoria	caerulea	NA	WHITE'S TREE	FROG	LIV	180	NO	260	ID	ID	T	W	C	C	2000-01-02	2000	2000-01-02	2000	I	LA	DOLPHIN INTERNATIONAL	PT VIVARIA INDONESIA	NA	Litoria caerulea	Litoria caerulea
2000723114	CYOR	amphibian	Amphibia	Cynops	orientalis	NA	CHINESE DWARF	NEWT	LIV	1700	NO	186	HK	HK	T	W	C	C	2000-01-02	2000	2000-01-02	2000	I	LA	DOLPHIN INTERNATIONAL	SANWOO FISHERIES	NA	Cynops orientalis	Cynops orientalis
2000723114	HYMC	amphibian	Amphibia	Hymenochirus	curtipes	NA	W. DWARF CLAWED	FROG	LIV	3360	NO	403	HK	HK	T	W	C	C	2000-01-02	2000	2000-01-02	2000	I	LA	DOLPHIN INTERNATIONAL	SANWOO FISHERIES	NA	Hymenochirus curtipes	Hymenochirus curtipes
2000723589	HYMC	amphibian	Amphibia	Hymenochirus	curtipes	NA	W. DWARF CLAWED	FROG	LIV	1600	NO	366	HK	HK	T	W	C	C	2000-01-02	2000	2000-01-02	2000	I	LA	AQUACO, INC.	DRAGON FISHERIES	NA	Hymenochirus curtipes	Hymenochirus curtipes
2000724639	BOOR	amphibian	Amphibia	Bombina	orientalis	NA	ORIENTAL FIREBELLY	TOAD	LIV	2000	NO	547	CN	CN	T	W	C	C	2000-01-02	2000	2000-01-02	2000	I	LA	DOLPHIN INTERNATIONAL	SHANGHAI GOLDEN FIELD	NA	Bombina orientalis	Bombina orientalis
2000724639	CYOR	amphibian	Amphibia	Cynops	orientalis	NA	CHINESE DWARF	NEWT	LIV	6000	NO	627	CN	CN	T	W	C	C	2000-01-02	2000	2000-01-02	2000	I	LA	DOLPHIN INTERNATIONAL	SHANGHAI GOLDEN FIELD	NA	Cynops orientalis	Cynops orientalis
2000733064	BOOR	amphibian	Amphibia	Bombina	orientalis	NA	ORIENTAL FIREBELLY	TOAD	LIV	400	NO	112	CN	CN	T	W	C	C	2000-01-06	2000	2000-01-02	2000	I	NY	FISH MART INC.	SHANGHAI INTERNATIONAL TRADE & SERVICE	NA	Bombina orientalis	Bombina orientalis
2000733064	CYOR	amphibian	Amphibia	Cynops	orientalis	NA	CHINESE DWARF	NEWT	LIV	400	NO	112	CN	CN	T	W	C	C	2000-01-06	2000	2000-01-02	2000	I	NY	FISH MART INC.	SHANGHAI INTERNATIONAL TRADE & SERVICE	NA	Cynops orientalis	Cynops orientalis
2000695674	RACA	amphibian	Amphibia	Rana	catesbeiana	NA	NA	BULLFROG	LIV	1216	KG	1004	EC	EC	T	W	C	C	2000-01-06	2000	2000-01-03	2000	I	NW	KIN YICK TRADING CORPORATION	VIVACOCE CIA LTD	Original value in 'species' column: catesbeinana	Rana catesbeiana	Rana catesbeiana
2000701733	RACA	amphibian	Amphibia	Rana	catesbeiana	NA	NA	BULLFROG	LIV	350	KG	210	DO	DO	T	W	C	C	2000-01-26	2000	2000-01-03	2000	I	NW	TIN TIN FISH TRADING INC.	LIVE FROGSS DOMINICANA	Original value in 'species' column: catesbeinana	Rana catesbeiana	Rana catesbeiana
2000723230	AGCL	amphibian	Amphibia	Agalychnis	callidryas	NA	RED-EYED TREE	FROG	LIV	136	NO	1020	MX	MX	T	W	C	C	2000-01-04	2000	2000-01-03	2000	I	LA	NA	GRANJA BIOMAT	NA	Agalychnis callidryas	Agalychnis callidryas
2000746084	RACA	amphibian	Amphibia	Rana	catesbeiana	NA	NA	BULLFROG	LIV	975	NO	195	DO	DO	T	C	C	C	2000-04-18	2000	2000-01-03	2000	I	NW	NORTH SEA TRADING CORPORATION	HECTOR ANT TORO	Original value in 'species' column: catesbeinana	Rana catesbeiana	Rana catesbeiana
2000698801	RACA	amphibian	Amphibia	Rana	catesbeiana	NA	NA	BULLFROG	LIV	68	KG	593	TW	CA	T	U	C	C	2000-01-05	2000	2000-01-04	2000	I	BN	MING'S SUPERMARKET INC.	BEAVER FISHERY	Original value in 'species' column: catesbeinana	Rana catesbeiana	Rana catesbeiana
2000701726	RACA	amphibian	Amphibia	Rana	catesbeiana	NA	NA	BULLFROG	LIV	400	KG	238	DO	DO	T	W	C	C	2000-01-26	2000	2000-01-04	2000	I	NW	TIN TIN FISH TRADING INC.	LIVE FROGSS DOMINGANA	Original value in 'species' column: catesbeinana	Rana catesbeiana	Rana catesbeiana
2000723568	BOOR	amphibian	Amphibia	Bombina	orientalis	NA	ORIENTAL FIREBELLY	TOAD	LIV	6000	NO	900	CN	CN	T	W	C	C	2000-01-04	2000	2000-01-04	2000	I	LA	R. H. PET INCORPORATED	SAB FUQI IMPORT & EXPORT CO LIMITED	NA	Bombina orientalis	Bombina orientalis
2000723568	CYOR	amphibian	Amphibia	Cynops	orientalis	NA	CHINESE DWARF	NEWT	LIV	3500	NO	175	CN	CN	T	W	C	C	2000-01-04	2000	2000-01-04	2000	I	LA	R. H. PET INCORPORATED	SAB FUQI IMPORT & EXPORT CO LIMITED	NA	Cynops orientalis	Cynops orientalis
2000734414	RACA	amphibian	Amphibia	Rana	catesbeiana	NA	NA	BULLFROG	LIV	2700	NO	987	TW	TW	T	W	C	C	2000-01-10	2000	2000-01-04	2000	I	NY	KIN YICK TRADING CORPORATION	ESTATE GALLERY INT'L TRADE	Original value in 'species' column: catesbeinana	Rana catesbeiana	Rana catesbeiana
2000736985	RACA	amphibian	Amphibia	Rana	catesbeiana	NA	NA	BULLFROG	LIV	5000	NO	224	DO	DO	T	C	C	C	2000-03-07	2000	2000-01-04	2000	I	NW	KIN YICK TRADING CORPORATION	EXPORTADORA GONZALEZ	Original value in 'species' column: catesbeinana	Rana catesbeiana	Rana catesbeiana
2000794973	RAFO	amphibian	Amphibia	Rana	forreri	NA	FORRER'S GRASS	FROG	SPE	48750	NO	24750	MX	MX	T	W	C	C	2000-01-07	2000	2000-01-04	2000	I	NG	RANACO CORPORATION	P.A.M.E.E.S.A.	NA	Rana forreri	Rana forreri
2000843277	RMAC	amphibian	Amphibia	Rana	macrodon	NA	NA	BULLFROG	LPS	2	NO	80	SG	IT	T	W	C	C	2000-01-04	2000	2000-01-04	2000	I	NY	MAURI U.S.A.	MAURI SPA	NA	Rana macrodon	NA
2000848895	ANCT	amphibian	Amphibia	NA	NA	NA	NON-CITES	AMPHIBIANS	LIV	1200	NO	60	NI	NI	T	U	C	C	2000-01-04	2000	2000-01-04	2000	I	MI	RICHARD J. TIEDER INC.	GIN INC.	NA	Na na	NA
2000731813	BOOR	amphibian	Amphibia	Bombina	orientalis	NA	ORIENTAL FIREBELLY	TOAD	LIV	200	NO	20	CN	CN	T	W	C	C	2000-01-12	2000	2000-01-05	2000	I	NY	MIN HUA ENTERPRISE, INC.	SHANGHAI NATIVE PRODUCE IMP & EXP CORP	NA	Bombina orientalis	Bombina orientalis
2000731813	CYOR	amphibian	Amphibia	Cynops	orientalis	NA	CHINESE DWARF	NEWT	LIV	200	NO	10	CN	CN	T	W	C	C	2000-01-12	2000	2000-01-05	2000	I	NY	MIN HUA ENTERPRISE, INC.	SHANGHAI NATIVE PRODUCE IMP & EXP CORP	NA	Cynops orientalis	Cynops orientalis
2000753786	RACA	amphibian	Amphibia	Rana	catesbeiana	NA	NA	BULLFROG	LIV	996	NO	249	DO	DO	T	C	C	C	2000-04-20	2000	2000-01-05	2000	I	NW	NORTH SEA TRADING CORPORATION	HECTOR ANT TORO	Original value in 'species' column: catesbeinana	Rana catesbeiana	Rana catesbeiana
2000789235	RACA	amphibian	Amphibia	Rana	catesbeiana	NA	NA	BULLFROG	LIV	996	NO	249	DO	DO	T	C	C	C	2000-08-29	2000	2000-01-05	2000	I	NW	NORTH SEA TRADING CORPORATION	HECTOR ANT. TORO	Original value in 'species' column: catesbeinana	Rana catesbeiana	Rana catesbeiana
2000723364	KALO	amphibian	Amphibia	Kaloula	pulchra	NA	ASIATIC PAINTED	FROG	LIV	60	NO	180	MY	MY	T	W	C	C	2000-01-06	2000	2000-01-06	2000	I	LA	L. A. REPTILE	CBS WILDLIFE	NA	Kaloula pulchra	Kaloula pulchra
2000723364	LHAS	amphibian	Amphibia	Leptobrachium	hasseltii	NA	JAVA SPADEFOOT	TOAD	LIV	100	NO	300	MY	MY	T	W	C	C	2000-01-06	2000	2000-01-06	2000	I	LA	L. A. REPTILE	CBS WILDLIFE	NA	Leptobrachium hasseltii	Leptobrachium hasseltii
2000723364	MENA	amphibian	Amphibia	Megophrys	nasuta	NA	SPADEFOOT	TOAD	LIV	120	NO	900	MY	MY	T	W	C	C	2000-01-06	2000	2000-01-06	2000	I	LA	L. A. REPTILE	CBS WILDLIFE	NA	Megophrys nasuta	Pelobatrachus nasuta
2000723364	PEHO	amphibian	Amphibia	Pedostibes	hosii	NA	BOULEN. ASIAN TREE	TOAD	LIV	5	NO	200	MY	MY	T	W	C	C	2000-01-06	2000	2000-01-06	2000	I	LA	L. A. REPTILE	CBS WILDLIFE	NA	Pedostibes hosii	Rentapia hosii
2000736333	RACA	amphibian	Amphibia	Rana	catesbeiana	NA	NA	BULLFROG	LIV	3000	NO	945	TW	TW	T	W	C	C	2000-01-10	2000	2000-01-06	2000	I	NY	HOY LUNG COMPANY	HORREI FISHERY COMPANY	Original value in 'species' column: catesbeinana	Rana catesbeiana	Rana catesbeiana
2000785065	KALO	amphibian	Amphibia	Kaloula	pulchra	NA	ASIATIC PAINTED	FROG	LIV	66	NO	1901	VN	VN	T	W	C	C	2000-01-06	2000	2000-01-06	2000	I	MI	STUBBS, RICHARD A	V.C.S. CORPS	NA	Kaloula pulchra	Kaloula pulchra
2000788700	RACA	amphibian	Amphibia	Rana	catesbeiana	NA	NA	BULLFROG	LIV	5000	NO	1086	EC	EC	T	C	C	C	2000-01-06	2000	2000-01-06	2000	I	NW	KIN YICK TRADING CORPORATION	ASSOCIATION DE PRODUCTIONS	Original value in 'species' column: catesbeinana	Rana catesbeiana	Rana catesbeiana
2000788715	RACA	amphibian	Amphibia	Rana	catesbeiana	NA	NA	BULLFROG	LIV	5000	NO	368	DO	DO	T	C	C	C	2000-01-31	2000	2000-01-06	2000	I	NW	KIN YICK TRADING CORPORATION	EXPORTADOR GONZALEZ	Original value in 'species' column: catesbeinana	Rana catesbeiana	Rana catesbeiana
2000789243	RACA	amphibian	Amphibia	Rana	catesbeiana	NA	NA	BULLFROG	LIV	612	NO	153	DO	DO	T	C	C	C	2000-08-29	2000	2000-01-07	2000	I	NW	NORTH SEA TRADING CORPORATION	HECTOR ANT TORO	Original value in 'species' column: catesbeinana	Rana catesbeiana	Rana catesbeiana
2000794571	XELA	amphibian	Amphibia	Xenopus	laevis	NA	AFRICAN CLAWED	TOAD	LIV	600	NO	90	CZ	CZ	T	C	C	C	2000-01-07	2000	2000-01-07	2000	I	NW	GLOBAL TROPICAL RESOURCES INC.	ING. RICHARD HOUSKA	NA	Xenopus laevis	Xenopus laevis
2000794969	RAFO	amphibian	Amphibia	Rana	forreri	NA	FORRER'S GRASS	FROG	SPE	46319	NO	30240	MX	MX	T	W	C	C	2000-01-10	2000	2000-01-07	2000	I	NG	RANACO CORPORATION	P.A.M.E.E.S.A.	NA	Rana forreri	Rana forreri
2000723324	HYMC	amphibian	Amphibia	Hymenochirus	curtipes	NA	W. DWARF CLAWED	FROG	LIV	1900	NO	760	SG	SG	T	W	C	C	2000-01-08	2000	2000-01-08	2000	I	LA	AQUA-NAUTIC SPECIALIST	AQUANAUTICS SPECIALIST PTE LTD	NA	Hymenochirus curtipes	Hymenochirus curtipes
2000723368	CEGU	amphibian	Amphibia	Ceratobatrachus	guentheri	NA	GUNTHER'S TRIANGLE	FROG	LIV	120	NO	240	SB	SB	T	W	C	C	2000-01-08	2000	2000-01-08	2000	I	LA	L. A. REPTILE	JINNEY ROBERT ETE	NA	Ceratobatrachus guentheri	NA
2000725985	HYMC	amphibian	Amphibia	Hymenochirus	curtipes	NA	W. DWARF CLAWED	FROG	LIV	700	NO	130	HK	HK	T	W	C	C	2000-01-10	2000	2000-01-08	2000	I	NY	ERDA INC.	BROTHER AQUARIUM	NA	Hymenochirus curtipes	Hymenochirus curtipes
2000733141	CYPY	amphibian	Amphibia	Cynops	pyrrhogaster	NA	JAPANESE FIREBELLY	NEWT	LIV	100	NO	12	HK	HK	T	W	C	C	2000-01-11	2000	2000-01-08	2000	I	NY	BOZMAN IMPORTS LTD.	UNION TROPICAL FISH FARM	NA	Cynops pyrrhogaster	Cynops pyrrhogaster
2000733141	XELA	amphibian	Amphibia	Xenopus	laevis	NA	AFRICAN CLAWED	TOAD	LIV	200	NO	300	HK	HK	T	W	C	C	2000-01-11	2000	2000-01-08	2000	I	NY	BOZMAN IMPORTS LTD.	UNION TROPICAL FISH FARM	NA	Xenopus laevis	Xenopus laevis
2000721447	HYMC	amphibian	Amphibia	Hymenochirus	curtipes	NA	W. DWARF CLAWED	FROG	LIV	1950	NO	780	SG	SG	T	W	C	C	2000-01-09	2000	2000-01-09	2000	I	LA	AQUA-NAUTIC SPECIALIST	AQUANAUTICS SPECIALIST	NA	Hymenochirus curtipes	Hymenochirus curtipes
2000721914	LICA	amphibian	Amphibia	Litoria	caerulea	NA	WHITE'S TREE	FROG	LIV	20	NO	16	ID	ID	T	W	C	C	2000-01-09	2000	2000-01-09	2000	I	LA	DOLPHIN INTERNATIONAL	VIVAJAYA INTERNATIONAL	NA	Litoria caerulea	Litoria caerulea
2000721914	OOLI	amphibian	Amphibia	Occidozyga	lima	NA	PADDY	FROG	LIV	1350	NO	54	ID	ID	T	W	C	C	2000-01-09	2000	2000-01-09	2000	I	LA	DOLPHIN INTERNATIONAL	VIVAJAYA INTERNATIONAL	Original value in 'genus' column: ooedozyga	Occidozyga lima	Occidozyga lima
2000721915	HYMC	amphibian	Amphibia	Hymenochirus	curtipes	NA	W. DWARF CLAWED	FROG	LIV	300	NO	24	ID	ID	T	W	C	C	2000-01-09	2000	2000-01-09	2000	I	LA	DOLPHIN INTERNATIONAL	P.T. VIVARIA INDONESIA	NA	Hymenochirus curtipes	Hymenochirus curtipes
2000721915	LICA	amphibian	Amphibia	Litoria	caerulea	NA	WHITE'S TREE	FROG	LIV	160	NO	320	ID	ID	T	W	C	C	2000-01-09	2000	2000-01-09	2000	I	LA	DOLPHIN INTERNATIONAL	P.T. VIVARIA INDONESIA	NA	Litoria caerulea	Litoria caerulea
2000722179	CYOR	amphibian	Amphibia	Cynops	orientalis	NA	CHINESE DWARF	NEWT	LIV	450	NO	117	HK	HK	T	W	C	C	2000-01-09	2000	2000-01-09	2000	I	LA	DOLPHIN INTERNATIONAL	SANWOO FISHERIES	NA	Cynops orientalis	Cynops orientalis
2000722186	ANCT	amphibian	Amphibia	NA	NA	NA	NON-CITES	AMPHIBIANS	LIV	25	NO	13	HK	HK	T	W	C	C	2000-01-09	2000	2000-01-09	2000	I	LA	TROPICAL ENTERPRISES	CEYLON AQUARIUM	NA	Na na	NA
2000723314	HYMC	amphibian	Amphibia	Hymenochirus	curtipes	NA	W. DWARF CLAWED	FROG	LIV	6000	NO	1373	HK	HK	T	W	C	C	2000-01-09	2000	2000-01-09	2000	I	LA	AQUACO, INC.	DRAGON FISHERIES	NA	Hymenochirus curtipes	Hymenochirus curtipes
2000723536	RACA	amphibian	Amphibia	Rana	catesbeiana	NA	NA	BULLFROG	LEG	19595	KG	122671	TW	TW	T	NA	C	C	2000-01-06	2000	2000-01-09	2000	I	LA	BEAVER STREET FISHERIES, INC.	ASIAPACRIM MERCANTILE, INC	Original value in 'species' column: catesbeinana	Rana catesbeiana	Rana catesbeiana
2000734417	RACA	amphibian	Amphibia	Rana	catesbeiana	NA	NA	BULLFROG	LIV	2700	NO	1029	TW	TW	T	W	C	C	2000-01-10	2000	2000-01-09	2000	I	NY	KIN YICK TRADING CORPORATION	ESTATE GALLERY INT'L TRADE	Original value in 'species' column: catesbeinana	Rana catesbeiana	Rana catesbeiana
2000735106	OOLI	amphibian	Amphibia	Occidozyga	lima	NA	PADDY	FROG	LIV	150	NO	14	ID	ID	T	W	C	C	2000-01-14	2000	2000-01-09	2000	I	NY	BOZMAN IMPORTS LTD.	VIAJAYA INTL	Original value in 'genus' column: ooedozyga	Occidozyga lima	Occidozyga lima
2000720716	RACA	amphibian	Amphibia	Rana	catesbeiana	NA	NA	BULLFROG	LIV	10000	KG	34564	TW	TW	T	W	C	C	2000-01-11	2000	2000-01-10	2000	I	SF	NOR-CAL SEAFOOD INC.	PENSETO SEAFOOD CO LTD.	Original value in 'species' column: catesbeinana	Rana catesbeiana	Rana catesbeiana
2000721213	BOOR	amphibian	Amphibia	Bombina	orientalis	NA	ORIENTAL FIREBELLY	TOAD	LIV	1500	NO	150	CN	CN	T	C	C	C	2000-01-10	2000	2000-01-10	2000	I	LA	GOLDEN POND	SHANGHAI NEW LONG MARCH INTERNATIONAL TRADE CO.	NA	Bombina orientalis	Bombina orientalis
2000722214	RLEU	amphibian	Amphibia	Rhacophorus	leucomystax	NA	FLYING	FROG	LIV	150	NO	60	VN	VN	T	W	C	C	2000-01-10	2000	2000-01-10	2000	I	LA	L. A. REPTILE	CORIMEX	NA	Rhacophorus leucomystax	NA
2000788712	RACA	amphibian	Amphibia	Rana	catesbeiana	NA	NA	BULLFROG	LIV	5000	NO	272	DO	DO	T	C	C	C	2000-02-17	2000	2000-01-10	2000	I	NW	KIN YICK TRADING CORPORATION	EXPORTADOR GONZALEZ	Original value in 'species' column: catesbeinana	Rana catesbeiana	Rana catesbeiana
2000789254	RACA	amphibian	Amphibia	Rana	catesbeiana	NA	NA	BULLFROG	LIV	1380	NO	345	DO	DO	T	C	C	C	2000-08-29	2000	2000-01-10	2000	I	NW	NORTH SEA TRADING CORPORATION	HECTOR ANT TORO	Original value in 'species' column: catesbeinana	Rana catesbeiana	Rana catesbeiana
2000698625	RACA	amphibian	Amphibia	Rana	catesbeiana	NA	NA	BULLFROG	LIV	68	KG	593	TW	CA	T	U	C	C	2000-01-12	2000	2000-01-11	2000	I	BN	MING'S SUPERMARKET INC.	BEAVER FISHERY	Original value in 'species' column: catesbeinana	Rana catesbeiana	Rana catesbeiana
2000723198	RACA	amphibian	Amphibia	Rana	catesbeiana	NA	NA	BULLFROG	MEA	18153	NO	108812	TW	TW	T	W	C	C	2000-01-10	2000	2000-01-11	2000	I	LA	BEAVER STREET FISHERIES, INC.	MOON RIVER FOODS CO LIMITED	Original value in 'species' column: catesbeinana	Rana catesbeiana	Rana catesbeiana
2000697894	RMAC	amphibian	Amphibia	Rana	macrodon	NA	NA	BULLFROG	LEG	19731	KG	109525	ID	BE	T	W	C	C	2000-01-12	2000	2000-01-12	2000	I	BO	INTEROCEAN INC.	EUROTRACO N.V.	NA	Rana macrodon	NA
2000721248	RACA	amphibian	Amphibia	Rana	catesbeiana	NA	NA	BULLFROG	LEG	2041	KG	12440	TW	TW	T	NA	C	C	2000-01-13	2000	2000-01-12	2000	I	LA	OCEAN CHOICE SEAFOOD	HOGIYA SEAFOODS INC	Original value in 'species' column: catesbeinana	Rana catesbeiana	Rana catesbeiana
2000721261	RACA	amphibian	Amphibia	Rana	catesbeiana	NA	NA	BULLFROG	MEA	635	KG	1250	VN	VN	T	W	C	C	2000-01-13	2000	2000-01-12	2000	I	LA	COUNTRY FLAVOR CORP.	NHAN HOA COMPANY LTD	Original value in 'species' column: catesbeinana	Rana catesbeiana	Rana catesbeiana
2000779217	XELA	amphibian	Amphibia	Xenopus	laevis	NA	AFRICAN CLAWED	TOAD	LIV	500	NO	1000	ZA	ZA	T	W	C	C	2000-01-12	2000	2000-01-12	2000	I	MI	XENOPUS EXPRESS	NA	NA	Xenopus laevis	Xenopus laevis
2000701719	RACA	amphibian	Amphibia	Rana	catesbeiana	NA	NA	BULLFROG	LIV	354	KG	312	DO	DO	T	W	C	C	2000-01-26	2000	2000-01-13	2000	I	NW	KIN YICK TRADING CORPORATION	EXPORTADOR GONZALEZ	Original value in 'species' column: catesbeinana	Rana catesbeiana	Rana catesbeiana
2000701729	RACA	amphibian	Amphibia	Rana	catesbeiana	NA	NA	BULLFROG	LIV	499	KG	310	DO	DO	T	W	C	C	2000-01-26	2000	2000-01-13	2000	I	NW	TIN TIN FISH TRADING INC.	LIVE FROGSS DOMINICANA	Original value in 'species' column: catesbeinana	Rana catesbeiana	Rana catesbeiana
2000701815	RACA	amphibian	Amphibia	Rana	catesbeiana	NA	NA	BULLFROG	LIV	963	KG	963	EC	EC	T	W	C	C	2000-01-26	2000	2000-01-13	2000	I	NW	KIN YICK TRADING CORPORATION	VIVACOCE Y CIA	Original value in 'species' column: catesbeinana	Rana catesbeiana	Rana catesbeiana
2000723030	RACA	amphibian	Amphibia	Rana	catesbeiana	NA	NA	BULLFROG	MEA	9526	KG	57520	TW	TW	T	W	C	C	2000-01-13	2000	2000-01-13	2000	I	LA	SEA PORT PRODUCTS CORP.	MARNEX COMPANY	Original value in 'species' column: catesbeinana	Rana catesbeiana	Rana catesbeiana
2000699281	RATI	amphibian	Amphibia	Hoplobatrachus	tigerinus	NA	INDIAN	BULLFROG	MEA	17010	KG	76252	VN	VN	T	C	C	C	2000-01-18	2000	2000-01-14	2000	I	NW	PHOENIX TRADING CORPORATION	SEASPIMEX	NA	Hoplobatrachus tigerinus	Hoplobatrachus tigerinus
2000701811	RACA	amphibian	Amphibia	Rana	catesbeiana	NA	NA	BULLFROG	LIV	405	KG	243	DO	DO	T	W	C	C	2000-01-26	2000	2000-01-14	2000	I	NW	NORTH SEA TRADING CORPORATION	HECTOR ANT. TORO	Original value in 'species' column: catesbeinana	Rana catesbeiana	Rana catesbeiana
2000794935	RACA	amphibian	Amphibia	Rana	catesbeiana	NA	NA	BULLFROG	SPE	917	NO	578	MX	MX	T	W	C	C	2000-01-18	2000	2000-01-14	2000	I	NG	RANACO CORPORATION	P.A.M.E.E.S.A.	Original value in 'species' column: catesbeinana	Rana catesbeiana	Rana catesbeiana
2000794935	RAFO	amphibian	Amphibia	Rana	forreri	NA	FORRER'S GRASS	FROG	SPE	22492	NO	9927	MX	MX	T	W	C	C	2000-01-18	2000	2000-01-14	2000	I	NG	RANACO CORPORATION	P.A.M.E.E.S.A.	NA	Rana forreri	Rana forreri
2000701736	RACA	amphibian	Amphibia	Rana	catesbeiana	NA	NA	BULLFROG	LIV	300	KG	168	DO	DO	T	W	C	C	2000-01-26	2000	2000-01-15	2000	I	NW	TIN TIN FISH TRADING INC.	LIVE FROGSS DOMINICANA	Original value in 'species' column: catesbeinana	Rana catesbeiana	Rana catesbeiana
2000722111	HYMC	amphibian	Amphibia	Hymenochirus	curtipes	NA	W. DWARF CLAWED	FROG	LIV	1500	NO	600	SG	SG	T	W	C	C	2000-01-15	2000	2000-01-15	2000	I	LA	AQUA-NAUTIC SPECIALIST	AQUANAUTICS SPECIALIST PTE LTD	NA	Hymenochirus curtipes	Hymenochirus curtipes
2000722163	BOOR	amphibian	Amphibia	Bombina	orientalis	NA	ORIENTAL FIREBELLY	TOAD	LIV	3000	NO	450	CN	CN	T	W	C	C	2000-01-15	2000	2000-01-15	2000	I	LA	Z IMPORTS INC.	XIAOSHAN IMPORT & EXPORT CO.	NA	Bombina orientalis	Bombina orientalis
2000722163	CYOR	amphibian	Amphibia	Cynops	orientalis	NA	CHINESE DWARF	NEWT	LIV	2000	NO	100	CN	CN	T	W	C	C	2000-01-15	2000	2000-01-15	2000	I	LA	Z IMPORTS INC.	XIAOSHAN IMPORT & EXPORT CO.	NA	Cynops orientalis	Cynops orientalis
2000726950	CYPY	amphibian	Amphibia	Cynops	pyrrhogaster	NA	JAPANESE FIREBELLY	NEWT	LIV	100	NO	45	HK	HK	T	W	C	C	2000-01-19	2000	2000-01-15	2000	I	NY	ERDA INC.	BROTHER AQUARIUM	NA	Cynops pyrrhogaster	Cynops pyrrhogaster
2000726950	HYMC	amphibian	Amphibia	Hymenochirus	curtipes	NA	W. DWARF CLAWED	FROG	LIV	450	NO	85	HK	HK	T	W	C	C	2000-01-19	2000	2000-01-15	2000	I	NY	ERDA INC.	BROTHER AQUARIUM	NA	Hymenochirus curtipes	Hymenochirus curtipes
2000729130	XELA	amphibian	Amphibia	Xenopus	laevis	NA	AFRICAN CLAWED	TOAD	LIV	300	NO	30	NG	NG	T	W	C	C	2000-01-15	2000	2000-01-15	2000	I	HN	AFRICAN EXOTIC TROPICAL FISH FACTORY	BAI INTERNATIONAL FISHERIES INC.	NA	Xenopus laevis	Xenopus laevis
2000749871	BOOR	amphibian	Amphibia	Bombina	orientalis	NA	ORIENTAL FIREBELLY	TOAD	LIV	60	NO	53	HK	HK	T	W	C	C	2000-01-15	2000	2000-01-15	2000	I	NY	BOZMAN IMPORTS LTD.	UNION TROPICAL FISH FARM	NA	Bombina orientalis	Bombina orientalis
2000749871	CYPY	amphibian	Amphibia	Cynops	pyrrhogaster	NA	JAPANESE FIREBELLY	NEWT	LIV	600	NO	72	HK	HK	T	W	C	C	2000-01-15	2000	2000-01-15	2000	I	NY	BOZMAN IMPORTS LTD.	UNION TROPICAL FISH FARM	NA	Cynops pyrrhogaster	Cynops pyrrhogaster
2000749871	XELA	amphibian	Amphibia	Xenopus	laevis	NA	AFRICAN CLAWED	TOAD	LIV	375	NO	56	HK	HK	T	W	C	C	2000-01-15	2000	2000-01-15	2000	I	NY	BOZMAN IMPORTS LTD.	UNION TROPICAL FISH FARM	NA	Xenopus laevis	Xenopus laevis
2000790924	PYAD	amphibian	Amphibia	Pyxicephalus	adspersus	NA	TSCHUDI'S AFRICAN	BULLFROG	LIV	100	NO	100	TZ	TZ	T	U	C	C	2000-01-24	2000	2000-01-15	2000	I	MI	STUBBS, RICHARD A	GRECHANT LMT	NA	Pyxicephalus adspersus	Pyxicephalus adspersus
2000721528	HYMC	amphibian	Amphibia	Hymenochirus	curtipes	NA	W. DWARF CLAWED	FROG	LIV	1200	NO	275	HK	HK	T	W	C	C	2000-01-16	2000	2000-01-16	2000	I	LA	AQUACO, INC.	DRAGON FISHERIES	NA	Hymenochirus curtipes	Hymenochirus curtipes
2000722003	LICA	amphibian	Amphibia	Litoria	caerulea	NA	WHITE'S TREE	FROG	LIV	20	NO	16	ID	ID	T	W	C	C	2000-01-16	2000	2000-01-16	2000	I	LA	DOLPHIN INTERNATIONAL	VIVAJAYA INTERNATIONAL	NA	Litoria caerulea	Litoria caerulea
2000722003	OOLI	amphibian	Amphibia	Occidozyga	lima	NA	PADDY	FROG	LIV	1050	NO	42	ID	ID	T	W	C	C	2000-01-16	2000	2000-01-16	2000	I	LA	DOLPHIN INTERNATIONAL	VIVAJAYA INTERNATIONAL	Original value in 'genus' column: ooedozyga	Occidozyga lima	Occidozyga lima
2000722004	HYMC	amphibian	Amphibia	Hymenochirus	curtipes	NA	W. DWARF CLAWED	FROG	LIV	1500	NO	120	ID	ID	T	W	C	C	2000-01-16	2000	2000-01-16	2000	I	LA	DOLPHIN INTERNATIONAL	P.T. VIVARIA INDONESIA	NA	Hymenochirus curtipes	Hymenochirus curtipes
2000722004	LICA	amphibian	Amphibia	Litoria	caerulea	NA	WHITE'S TREE	FROG	LIV	653	NO	510	ID	ID	T	W	C	C	2000-01-16	2000	2000-01-16	2000	I	LA	DOLPHIN INTERNATIONAL	P.T. VIVARIA INDONESIA	NA	Litoria caerulea	Litoria caerulea
2000722004	OOLI	amphibian	Amphibia	Occidozyga	lima	NA	PADDY	FROG	LIV	900	NO	63	ID	ID	T	W	C	C	2000-01-16	2000	2000-01-16	2000	I	LA	DOLPHIN INTERNATIONAL	P.T. VIVARIA INDONESIA	Original value in 'genus' column: ooedozyga	Occidozyga lima	Occidozyga lima
2000722006	CYOR	amphibian	Amphibia	Cynops	orientalis	NA	CHINESE DWARF	NEWT	LIV	900	NO	234	HK	HK	T	W	C	C	2000-01-16	2000	2000-01-16	2000	I	LA	DOLPHIN INTERNATIONAL	SANWOO FISHERIES	NA	Cynops orientalis	Cynops orientalis
2000722006	HYMC	amphibian	Amphibia	Hymenochirus	curtipes	NA	W. DWARF CLAWED	FROG	LIV	3920	NO	470	HK	HK	T	W	C	C	2000-01-16	2000	2000-01-16	2000	I	LA	DOLPHIN INTERNATIONAL	SANWOO FISHERIES	NA	Hymenochirus curtipes	Hymenochirus curtipes
2000722096	KALO	amphibian	Amphibia	Kaloula	pulchra	NA	ASIATIC PAINTED	FROG	LIV	220	NO	88	VN	VN	T	W	C	C	2000-01-16	2000	2000-01-16	2000	I	LA	UNIVERSAL AQUATIC	CORIMEX	NA	Kaloula pulchra	Kaloula pulchra
2000722096	RAAU	amphibian	Amphibia	Rana	aurora	NA	RED-LEGGED	FROG	LIV	90	NO	18	VN	VN	T	W	C	C	2000-01-16	2000	2000-01-16	2000	I	LA	UNIVERSAL AQUATIC	CORIMEX	NA	Rana aurora	Rana aurora
2000722096	RLEU	amphibian	Amphibia	Rhacophorus	leucomystax	NA	FLYING	FROG	LIV	260	NO	104	VN	VN	T	W	C	C	2000-01-16	2000	2000-01-16	2000	I	LA	UNIVERSAL AQUATIC	CORIMEX	NA	Rhacophorus leucomystax	NA
2000722143	BOOR	amphibian	Amphibia	Bombina	orientalis	NA	ORIENTAL FIREBELLY	TOAD	LIV	1400	NO	279	LK	LK	T	W	C	C	2000-01-16	2000	2000-01-16	2000	I	LA	DOLPHIN INTERNATIONAL	SHANGHAI GOLDEN FIELD GARDENING CO LTD.	NA	Bombina orientalis	Bombina orientalis
2000722143	CYOR	amphibian	Amphibia	Cynops	orientalis	NA	CHINESE DWARF	NEWT	LIV	8100	NO	808	LK	LK	T	W	C	C	2000-01-16	2000	2000-01-16	2000	I	LA	DOLPHIN INTERNATIONAL	SHANGHAI GOLDEN FIELD GARDENING CO LTD.	NA	Cynops orientalis	Cynops orientalis
2000730840	OOLI	amphibian	Amphibia	Occidozyga	lima	NA	PADDY	FROG	LIV	75	NO	7	ID	ID	T	W	C	C	2000-01-18	2000	2000-01-16	2000	I	NY	BOZMAN IMPORTS LTD.	VIAJAYA INTERNATIONAL	Original value in 'genus' column: ooedozyga	Occidozyga lima	Occidozyga lima
2000699276	RACA	amphibian	Amphibia	Rana	catesbeiana	NA	NA	BULLFROG	LIV	5000	NO	260	DO	DO	T	C	C	C	2000-01-18	2000	2000-01-18	2000	I	NW	KIN YICK TRADING CORPORATION	EXPORTADORA GONZALES S.A.	Original value in 'species' column: catesbeinana	Rana catesbeiana	Rana catesbeiana
2000701828	RACA	amphibian	Amphibia	Rana	catesbeiana	NA	NA	BULLFROG	LIV	5000	NO	1097	EC	EC	T	C	C	C	2000-01-19	2000	2000-01-18	2000	I	NW	KIN YICK TRADING CORPORATION	ASOCIACION PI ODUCTORAS DE RANAS	Original value in 'species' column: catesbeinana	Rana catesbeiana	Rana catesbeiana
2000721568	RACA	amphibian	Amphibia	Rana	catesbeiana	NA	NA	BULLFROG	MEA	5444	KG	33939	TW	TW	T	W	C	C	2000-01-24	2000	2000-01-18	2000	I	LA	H & N FISH CO.	FOREVER FROZEN FOODS INC.	Original value in 'species' column: catesbeinana	Rana catesbeiana	Rana catesbeiana
2000731063	AGCL	amphibian	Amphibia	Agalychnis	callidryas	NA	RED-EYED TREE	FROG	LIV	200	NO	200	NI	NI	T	C	C	C	2000-01-18	2000	2000-01-18	2000	I	MI	BURGUNDY REPTILE TRADERS	NATUANEX	NA	Agalychnis callidryas	Agalychnis callidryas
2000750573	RACA	amphibian	Amphibia	Rana	catesbeiana	NA	NA	BULLFROG	LIV	3000	NO	945	TW	TW	T	W	C	C	2000-01-18	2000	2000-01-18	2000	I	NY	HOY LUNG CO	HORREI FISHERY CO	Original value in 'species' column: catesbeinana	Rana catesbeiana	Rana catesbeiana
2000794595	RABE	amphibian	Amphibia	Rana	berlandieri	NA	RIO GRANDE	FROG	LIV	450	KG	2871	MX	MX	T	W	C	C	2000-01-18	2000	2000-01-18	2000	I	BV	RANA LABORATORIES	MMONTALVO ALVARO GARZA	NA	Rana berlandieri	Rana berlandieri
2000701834	RACA	amphibian	Amphibia	Rana	catesbeiana	NA	NA	BULLFROG	LIV	948	NO	237	DO	DO	T	C	C	C	2000-01-19	2000	2000-01-19	2000	I	NW	NORTH SEA TRADING CORPORATION	HECTOR ANT. TORO	Original value in 'species' column: catesbeinana	Rana catesbeiana	Rana catesbeiana
2000722177	CYOR	amphibian	Amphibia	Cynops	orientalis	NA	CHINESE DWARF	NEWT	LIV	7500	NO	818	CN	CN	T	W	C	C	2000-01-09	2000	2000-01-19	2000	I	LA	DOLPHIN INTERNATIONAL	SHANGHAI GOLDEN FIELD GARDENING CO LTD	NA	Cynops orientalis	Cynops orientalis
2000722235	KALO	amphibian	Amphibia	Kaloula	pulchra	NA	ASIATIC PAINTED	FROG	LIV	560	NO	84	TH	TH	T	W	C	C	2000-01-19	2000	2000-01-19	2000	I	LA	PETS INTERNATIONAL	ASIA WORLD WIDE IMPORT/EXPORT LTD	NA	Kaloula pulchra	Kaloula pulchra
2000785582	RACA	amphibian	Amphibia	Rana	catesbeiana	NA	NA	BULLFROG	LIV	903	KG	5100	GT	GT	T	U	C	C	2000-01-19	2000	2000-01-19	2000	I	MI	AQUALAND, INC.	PRODUCTOS MOBOT SA	Original value in 'species' column: catesbeinana	Rana catesbeiana	Rana catesbeiana
2000789256	RACA	amphibian	Amphibia	Rana	catesbeiana	NA	NA	BULLFROG	LIV	5000	NO	170	DO	DO	T	C	C	C	2000-08-29	2000	2000-01-20	2000	I	NW	TIN TIN FISH TRADING INC.	LIVE FROGS	Original value in 'species' column: catesbeinana	Rana catesbeiana	Rana catesbeiana
2000789417	RACA	amphibian	Amphibia	Rana	catesbeiana	NA	NA	BULLFROG	LIV	5000	NO	170	DO	DO	T	C	C	C	2000-08-30	2000	2000-01-20	2000	I	NW	TIN TIN FISH TRADING INC.	LIVE FROGS	Original value in 'species' column: catesbeinana	Rana catesbeiana	Rana catesbeiana
2000800042	BUME	amphibian	Amphibia	Bufo	melanostictus	NA	BLACK-SPINED	TOAD	LIV	20	NO	6	VN	VN	T	U	C	C	2000-01-20	2000	2000-01-20	2000	I	MI	GAMA SUPPLIERS, INC.	NA	NA	Bufo melanostictus	Duttaphrynus melanostictus
2000800042	KALO	amphibian	Amphibia	Kaloula	pulchra	NA	ASIATIC PAINTED	FROG	LIV	100	NO	30	VN	VN	T	U	C	C	2000-01-20	2000	2000-01-20	2000	I	MI	GAMA SUPPLIERS, INC.	NA	NA	Kaloula pulchra	Kaloula pulchra
2000800042	RLEU	amphibian	Amphibia	Rhacophorus	leucomystax	NA	FLYING	FROG	LIV	20	NO	6	VN	VN	T	U	C	C	2000-01-20	2000	2000-01-20	2000	I	MI	GAMA SUPPLIERS, INC.	NA	NA	Rhacophorus leucomystax	NA
2000720724	RACA	amphibian	Amphibia	Rana	catesbeiana	NA	NA	BULLFROG	LIV	10000	NO	34564	TW	TW	T	W	C	C	2000-01-20	2000	2000-01-21	2000	I	SF	NOR-CAL SEAFOOD INC.	PENSETO SEAFOOD CO LTD.	Original value in 'species' column: catesbeinana	Rana catesbeiana	Rana catesbeiana
2000722898	RACA	amphibian	Amphibia	Rana	catesbeiana	NA	NA	BULLFROG	LEG	6089	NO	11726	VN	VN	T	W	C	C	2000-01-25	2000	2000-01-21	2000	I	LA	COUNTRY FLAVOR CORP.	NHAN HOA COMPANY LTD	Original value in 'species' column: catesbeinana	Rana catesbeiana	Rana catesbeiana
2000730826	PBIF	amphibian	Amphibia	Phrynomantis	bifasciatus	NA	S AFR SNAKE-NECK	FROG	LIV	1	NO	2	GH	GH	T	W	C	C	2000-01-21	2000	2000-01-21	2000	I	NY	EAST COAST ZOOLOGICAL SUPPLY	NOMED COMMERCIAL HOUSE	NA	Phrynomantis bifasciatus	Phrynomantis bifasciatus
2000736248	RACA	amphibian	Amphibia	Rana	catesbeiana	NA	NA	BULLFROG	LIV	2700	NO	987	TW	TW	T	W	C	C	2000-01-31	2000	2000-01-21	2000	I	NY	KIN YICK TRADING CORPORATION	ESTATE GALLEN INTERNATIONAL TRADE CO	Original value in 'species' column: catesbeinana	Rana catesbeiana	Rana catesbeiana
2000788930	RACA	amphibian	Amphibia	Rana	catesbeiana	NA	NA	BULLFROG	LIV	5000	NO	301	DO	DO	T	C	C	C	2000-01-24	2000	2000-01-21	2000	I	NW	TIN TIN FISH TRADING INC.	MULTI #56	Original value in 'species' column: catesbeinana	Rana catesbeiana	Rana catesbeiana
2000793351	XELA	amphibian	Amphibia	Xenopus	laevis	NA	AFRICAN CLAWED	TOAD	LIV	250	NO	63	NG	NG	T	W	C	C	2000-01-21	2000	2000-01-21	2000	I	NW	GLOBAL TROPICAL RESOURCES INC.	SPIVAP NIGERIA LTD	NA	Xenopus laevis	Xenopus laevis
2000721777	HYMC	amphibian	Amphibia	Hymenochirus	curtipes	NA	W. DWARF CLAWED	FROG	LIV	220	NO	110	NG	NG	T	W	C	C	2000-01-22	2000	2000-01-22	2000	I	LA	CIS INTERNATIONAL CORP.	PELUSON COMPANY LIMITED	NA	Hymenochirus curtipes	Hymenochirus curtipes
2000726245	HYMC	amphibian	Amphibia	Hymenochirus	curtipes	NA	W. DWARF CLAWED	FROG	LIV	1700	NO	330	HK	HK	T	W	C	C	2000-01-26	2000	2000-01-22	2000	I	NY	ERDA INC.	BROTHER AQUARIUM	NA	Hymenochirus curtipes	Hymenochirus curtipes
2000743227	BOOR	amphibian	Amphibia	Bombina	orientalis	NA	ORIENTAL FIREBELLY	TOAD	LIV	60	NO	53	HK	HK	T	W	C	C	2000-01-27	2000	2000-01-22	2000	I	NY	BOZMAN IMPORTS LTD.	UNION TROPICAL FISH FARM	NA	Bombina orientalis	Bombina orientalis
2000743227	CYOR	amphibian	Amphibia	Cynops	orientalis	NA	CHINESE DWARF	NEWT	LIV	600	NO	72	HK	HK	T	W	C	C	2000-01-27	2000	2000-01-22	2000	I	NY	BOZMAN IMPORTS LTD.	UNION TROPICAL FISH FARM	NA	Cynops orientalis	Cynops orientalis
2000743227	XELA	amphibian	Amphibia	Xenopus	laevis	NA	AFRICAN CLAWED	TOAD	LIV	1050	NO	150	HK	HK	T	W	C	C	2000-01-27	2000	2000-01-22	2000	I	NY	BOZMAN IMPORTS LTD.	UNION TROPICAL FISH FARM	NA	Xenopus laevis	Xenopus laevis
2000757361	HYMC	amphibian	Amphibia	Hymenochirus	curtipes	NA	W. DWARF CLAWED	FROG	LIV	1500	NO	600	SG	SG	T	W	C	C	2000-01-22	2000	2000-01-22	2000	I	LA	AQUA-NAUTIC SPECIALIST	AQUANAUTICS SPECIALIST PTE LIMITED	NA	Hymenochirus curtipes	Hymenochirus curtipes
2000722064	HYMC	amphibian	Amphibia	Hymenochirus	curtipes	NA	W. DWARF CLAWED	FROG	LIV	60	NO	17	SG	SG	T	C	C	C	2000-01-23	2000	2000-01-23	2000	I	LA	TROPICAL FISH CONSOLIDATORS LTD.	SUNSHINE AQUARIUM	NA	Hymenochirus curtipes	Hymenochirus curtipes
2000722137	HYMC	amphibian	Amphibia	Hymenochirus	curtipes	NA	W. DWARF CLAWED	FROG	LIV	2000	NO	458	HK	HK	T	C	C	C	2000-01-23	2000	2000-01-23	2000	I	LA	AQUACO, INC.	DRAGON FISHERIES	NA	Hymenochirus curtipes	Hymenochirus curtipes
2000722301	OOLI	amphibian	Amphibia	Occidozyga	lima	NA	PADDY	FROG	LIV	600	NO	24	ID	ID	T	W	C	C	2000-01-23	2000	2000-01-23	2000	I	LA	DOLPHIN INTERNATIONAL	VIVAJAYA INTERNATIONAL	Original value in 'genus' column: ooedozyga	Occidozyga lima	Occidozyga lima
2000722313	HYMC	amphibian	Amphibia	Hymenochirus	curtipes	NA	W. DWARF CLAWED	FROG	LIV	2100	NO	168	ID	ID	T	W	C	C	2000-01-23	2000	2000-01-23	2000	I	LA	DOLPHIN INTERNATIONAL	P.T. VIVARIA INDONESIA	NA	Hymenochirus curtipes	Hymenochirus curtipes
2000722313	LICA	amphibian	Amphibia	Litoria	caerulea	NA	WHITE'S TREE	FROG	LIV	140	NO	180	ID	ID	T	W	C	C	2000-01-23	2000	2000-01-23	2000	I	LA	DOLPHIN INTERNATIONAL	P.T. VIVARIA INDONESIA	NA	Litoria caerulea	Litoria caerulea
2000722313	OOLI	amphibian	Amphibia	Occidozyga	lima	NA	PADDY	FROG	LIV	150	NO	11	ID	ID	T	W	C	C	2000-01-23	2000	2000-01-23	2000	I	LA	DOLPHIN INTERNATIONAL	P.T. VIVARIA INDONESIA	Original value in 'genus' column: ooedozyga	Occidozyga lima	Occidozyga lima
2000722327	CYOR	amphibian	Amphibia	Cynops	orientalis	NA	CHINESE DWARF	NEWT	LIV	9000	NO	872	CN	CN	T	W	C	C	2000-01-23	2000	2000-01-23	2000	I	LA	DOLPHIN INTERNATIONAL	SHANGHAI GOLDEN FIELD GARDENING CO LTD.	NA	Cynops orientalis	Cynops orientalis
2000722329	CYOR	amphibian	Amphibia	Cynops	orientalis	NA	CHINESE DWARF	NEWT	LIV	375	NO	98	HK	HK	T	W	C	C	2000-01-23	2000	2000-01-23	2000	I	LA	DOLPHIN INTERNATIONAL	SANWOO FISHERIES	NA	Cynops orientalis	Cynops orientalis
2000722329	HYMC	amphibian	Amphibia	Hymenochirus	curtipes	NA	W. DWARF CLAWED	FROG	LIV	3640	NO	400	HK	HK	T	W	C	C	2000-01-23	2000	2000-01-23	2000	I	LA	DOLPHIN INTERNATIONAL	SANWOO FISHERIES	NA	Hymenochirus curtipes	Hymenochirus curtipes
2000722361	OOLI	amphibian	Amphibia	Occidozyga	lima	NA	PADDY	FROG	LIV	1800	NO	72	ID	ID	T	W	C	C	2000-01-23	2000	2000-01-23	2000	I	LA	DOLPHIN INTERNATIONAL	VIVAJAYA INTERNATIONAL	Original value in 'genus' column: ooedozyga	Occidozyga lima	Occidozyga lima
2000723049	LICA	amphibian	Amphibia	Litoria	caerulea	NA	WHITE'S TREE	FROG	LIV	1010	NO	417	ID	ID	T	W	C	C	2000-01-23	2000	2000-01-23	2000	I	LA	AQUA-NAUTIC SPECIALIST	PT BEKAEL ESKA GEMILANG JL	NA	Litoria caerulea	Litoria caerulea
2000734398	BOOR	amphibian	Amphibia	Bombina	orientalis	NA	ORIENTAL FIREBELLY	TOAD	LIV	400	NO	120	CN	CN	T	W	C	C	2000-01-27	2000	2000-01-23	2000	I	NY	FISH MART INC.	SHANGHAI INTERNATIONAL TRADE & SERVICE	NA	Bombina orientalis	Bombina orientalis
2000788955	RACA	amphibian	Amphibia	Rana	catesbeiana	NA	NA	BULLFROG	LIV	5000	NO	165	DO	DO	T	C	C	C	2000-08-29	2000	2000-01-23	2000	I	NW	TIN TIN FISH TRADING INC.	LIVE FROGS	Original value in 'species' column: catesbeinana	Rana catesbeiana	Rana catesbeiana
2000732207	AGCL	amphibian	Amphibia	Agalychnis	callidryas	NA	RED-EYED TREE	FROG	LIV	200	NO	1400	NI	NI	T	C	C	C	2000-01-24	2000	2000-01-24	2000	I	MI	GAMA SUPPLIERS, INC.	ZOONICA SA	NA	Agalychnis callidryas	Agalychnis callidryas
2000764606	RLEU	amphibian	Amphibia	Rhacophorus	leucomystax	NA	FLYING	FROG	SPE	2	NO	1	VN	VN	S	W	C	C	2000-03-13	2000	2000-01-26	2000	I	NY	CENTER FOR BIODIVERSITY	INSTITUTE OF ECOLOGY AND BIOLOGICAL RESOURCES	NA	Rhacophorus leucomystax	NA
2000740428	ANCT	amphibian	Amphibia	NA	NA	NA	NON-CITES	AMPHIBIANS	LIV	13	NO	420	MY	MY	T	W	C	C	2000-01-27	2000	2000-01-27	2000	I	LA	L. A. REPTILE	CBS WILDLIFE	NA	Na na	NA
2000740428	KALO	amphibian	Amphibia	Kaloula	pulchra	NA	ASIATIC PAINTED	FROG	LIV	26	NO	78	MY	MY	T	W	C	C	2000-01-27	2000	2000-01-27	2000	I	LA	L. A. REPTILE	CBS WILDLIFE	NA	Kaloula pulchra	Kaloula pulchra
2000784685	XELA	amphibian	Amphibia	Xenopus	laevis	NA	AFRICAN CLAWED	TOAD	LIV	960	NO	48	NG	NG	T	U	C	C	2000-01-27	2000	2000-01-27	2000	I	MI	RICHARD J. TIEDER, INC.	GIN INCORPORATED	NA	Xenopus laevis	Xenopus laevis
2000784967	BUME	amphibian	Amphibia	Bufo	melanostictus	NA	BLACK-SPINED	TOAD	LIV	65	NO	33	VN	VN	T	U	C	C	2000-01-27	2000	2000-01-27	2000	I	MI	SOUTH FLORIDA REPTILE EXCHANGE	VINOFOR HANOI	NA	Bufo melanostictus	Duttaphrynus melanostictus
2000784967	KALO	amphibian	Amphibia	Kaloula	pulchra	NA	ASIATIC PAINTED	FROG	LIV	108	NO	54	VN	VN	T	U	C	C	2000-01-27	2000	2000-01-27	2000	I	MI	SOUTH FLORIDA REPTILE EXCHANGE	VINOFOR HANOI	NA	Kaloula pulchra	Kaloula pulchra
2000794940	RACA	amphibian	Amphibia	Rana	catesbeiana	NA	NA	BULLFROG	SPE	520	NO	413	MX	MX	T	W	C	C	2000-01-28	2000	2000-01-27	2000	I	NG	RANACO CORPORATION	P.A.M.E.E.S.A.	Original value in 'species' column: catesbeinana	Rana catesbeiana	Rana catesbeiana
2000794940	RAFO	amphibian	Amphibia	Rana	forreri	NA	FORRER'S GRASS	FROG	SPE	5560	NO	1890	MX	MX	T	W	C	C	2000-01-28	2000	2000-01-27	2000	I	NG	RANACO CORPORATION	P.A.M.E.E.S.A.	NA	Rana forreri	Rana forreri
2000727285	RACA	amphibian	Amphibia	Rana	catesbeiana	NA	NA	BULLFROG	LIV	1320	NO	385	DO	DO	T	C	C	C	2000-02-10	2000	2000-01-28	2000	I	NW	NORTH SEA TRADING CORPORATION	HECTOR TORO	Original value in 'species' column: catesbeinana	Rana catesbeiana	Rana catesbeiana
2000731143	RACA	amphibian	Amphibia	Rana	catesbeiana	NA	NA	BULLFROG	LIV	3000	NO	910	TW	TW	T	W	C	C	2000-02-07	2000	2000-01-28	2000	I	NY	HOY LUNG CO.	HORREI FISHING CO	Original value in 'species' column: catesbeinana	Rana catesbeiana	Rana catesbeiana
2000723590	HYMC	amphibian	Amphibia	Hymenochirus	curtipes	NA	W. DWARF CLAWED	FROG	LIV	1500	NO	600	SG	SG	T	W	C	C	2000-01-29	2000	2000-01-29	2000	I	LA	AQUA-NAUTIC SPECIALIST	AQUANAUTICS SPECIALIST PTE LIMITED	NA	Hymenochirus curtipes	Hymenochirus curtipes
2000726144	XELA	amphibian	Amphibia	Xenopus	laevis	NA	AFRICAN CLAWED	TOAD	LIV	1250	NO	188	HK	HK	T	W	C	C	2000-02-01	2000	2000-01-29	2000	I	NY	BOZMAN IMPORTS LTD.	UNION TROPICAL FISH FARM	NA	Xenopus laevis	Xenopus laevis
2000739871	CEGU	amphibian	Amphibia	Ceratobatrachus	guentheri	NA	GUNTHER'S TRIANGLE	FROG	LIV	120	NO	240	SB	SB	T	W	C	C	2000-01-29	2000	2000-01-29	2000	I	LA	L. A. REPTILE	NA	NA	Ceratobatrachus guentheri	NA
2000741575	BOOR	amphibian	Amphibia	Bombina	orientalis	NA	ORIENTAL FIREBELLY	TOAD	LIV	1000	NO	200	CN	CN	T	W	C	C	2000-01-29	2000	2000-01-29	2000	I	LA	Z IMPORTS INC.	XIAOSHAN IMPORT & EXPORT CO.	NA	Bombina orientalis	Bombina orientalis
2000750395	HYMC	amphibian	Amphibia	Hymenochirus	curtipes	NA	W. DWARF CLAWED	FROG	LIV	200	NO	40	HK	HK	T	W	C	C	2000-01-31	2000	2000-01-29	2000	I	NY	ERDA INC.	BROTHER AQUARIUM	NA	Hymenochirus curtipes	Hymenochirus curtipes
2000760849	RACA	amphibian	Amphibia	Rana	catesbeiana	NA	NA	BULLFROG	LIV	5000	NO	369	DO	DO	T	W	C	C	2000-01-31	2000	2000-01-29	2000	I	NY	TIN TIN FISH TRADING INC.	LIVE FROGS	Original value in 'species' column: catesbeinana	Rana catesbeiana	Rana catesbeiana
2000789422	RACA	amphibian	Amphibia	Rana	catesbeiana	NA	NA	BULLFROG	LIV	5000	NO	210	DO	DO	T	C	C	C	2000-08-30	2000	2000-01-29	2000	I	NW	TIN TIN FISH TRADING INC.	LIVE FROG	Original value in 'species' column: catesbeinana	Rana catesbeiana	Rana catesbeiana
2000722407	CYOR	amphibian	Amphibia	Cynops	orientalis	NA	CHINESE DWARF	NEWT	LIV	25	NO	30	SG	SG	T	C	C	C	2000-01-30	2000	2000-01-30	2000	I	LA	PET-SIAM INTERNATIONAL	OLYMPIA AQUARIUM	NA	Cynops orientalis	Cynops orientalis
2000722599	CYOR	amphibian	Amphibia	Cynops	orientalis	NA	CHINESE DWARF	NEWT	LIV	300	NO	84	HK	HR	T	W	C	C	2000-01-30	2000	2000-01-30	2000	I	LA	DOLPHIN INTERNATIONAL	SANWOO FISHERIES	NA	Cynops orientalis	Cynops orientalis
2000722662	OOLI	amphibian	Amphibia	Occidozyga	lima	NA	PADDY	FROG	LIV	150	NO	6	ID	ID	T	W	C	C	2000-01-30	2000	2000-01-30	2000	I	LA	DOLPHIN INTERNATIONAL	VIVAJAYA INTERNATIONAL	Original value in 'genus' column: ooedozyga	Occidozyga lima	Occidozyga lima
2000722679	HYMC	amphibian	Amphibia	Hymenochirus	curtipes	NA	W. DWARF CLAWED	FROG	LIV	1200	NO	96	ID	ID	T	W	C	C	2000-01-30	2000	2000-01-30	2000	I	LA	DOLPHIN INTERNATIONAL	PT VIVARIA INDONESIA	NA	Hymenochirus curtipes	Hymenochirus curtipes
2000722679	LICA	amphibian	Amphibia	Litoria	caerulea	NA	WHITE'S TREE	FROG	LIV	240	NO	480	ID	ID	T	W	C	C	2000-01-30	2000	2000-01-30	2000	I	LA	DOLPHIN INTERNATIONAL	PT VIVARIA INDONESIA	NA	Litoria caerulea	Litoria caerulea
2000722679	OOLI	amphibian	Amphibia	Occidozyga	lima	NA	PADDY	FROG	LIV	1050	NO	74	ID	ID	T	W	C	C	2000-01-30	2000	2000-01-30	2000	I	LA	DOLPHIN INTERNATIONAL	PT VIVARIA INDONESIA	Original value in 'genus' column: ooedozyga	Occidozyga lima	Occidozyga lima
2000736903	OOLI	amphibian	Amphibia	Occidozyga	lima	NA	PADDY	FROG	LIV	300	NO	27	ID	ID	T	W	C	C	2000-02-02	2000	2000-01-30	2000	I	NY	BOZMAN IMPORTS LTD.	VIAJAYA INTERNATIONAL	Original value in 'genus' column: ooedozyga	Occidozyga lima	Occidozyga lima
2000739283	HYMB	amphibian	Amphibia	Hymenochirus	boettgeri	NA	ZAIRE DWARF CLAWED	FROG	LIV	900	NO	99	HK	HK	T	C	C	C	2000-01-30	2000	2000-01-30	2000	I	LA	GLOBAL AQUATIC CONSULTING	BOKO EXPRESS COMPANY	NA	Hymenochirus boettgeri	Hymenochirus boettgeri
2000739740	HYMC	amphibian	Amphibia	Hymenochirus	curtipes	NA	W. DWARF CLAWED	FROG	LIV	1400	NO	600	SG	SG	T	W	C	C	2000-01-30	2000	2000-01-30	2000	I	LA	AQUA-NAUTIC SPECIALIST	AQUANAUTICS SPECIALIST PTE	NA	Hymenochirus curtipes	Hymenochirus curtipes
2000167832	BMAR	amphibian	Amphibia	Bufo	marinus	NA	NEOTROPICAL	TOAD	LIV	2	NO	28	GY	GY	T	W	C	C	2000-01-31	2000	2000-01-31	2000	I	MI	GAMA SUPPLIERS, INC.	NA	NA	Bufo marinus	NA
2000187819	DETI	amphibian	Amphibia	Dendrobates	tinctorius	NA	DYEING	POISON-ARROW FROG	LIV	11	NO	100	GY	GY	T	A	R	S	2000-01-31	2000	2000-01-31	2000	I	MI	GAMA SUPPLIERS, INC.	GAMA SUPPLIERS,INC	NA	Dendrobates tinctorius	Dendrobates tinctorius
2000187821	DETI	amphibian	Amphibia	Dendrobates	tinctorius	NA	DYEING	POISON-ARROW FROG	LIV	11	NO	100	GY	GY	T	A	R	S	2000-01-31	2000	2000-01-31	2000	I	MI	GAMA SUPPLIERS, INC.	GAMA SUPPLIERS,INC	NA	Dendrobates tinctorius	Dendrobates tinctorius
2000723924	CYOR	amphibian	Amphibia	Cynops	orientalis	NA	CHINESE DWARF	NEWT	LIV	800	NO	40	CN	CN	T	W	C	C	2000-01-31	2000	2000-01-31	2000	I	LA	R. H. PET INCORPORATED	SAB FU QI IMPORT & EXORT LIMITED	NA	Cynops orientalis	Cynops orientalis
2000731985	AGCL	amphibian	Amphibia	Agalychnis	callidryas	NA	RED-EYED TREE	FROG	LIV	200	NO	1400	NI	NI	T	C	C	C	2000-01-31	2000	2000-01-31	2000	I	MI	EMERALD CORAL & REPTILE	ZOONICA S.A.	NA	Agalychnis callidryas	Agalychnis callidryas
2000736312	RACA	amphibian	Amphibia	Rana	catesbeiana	NA	NA	BULLFROG	LIV	1320	NO	385	DO	DO	T	W	C	C	2000-01-31	2000	2000-01-31	2000	I	NY	NORTH SEA TRADING CORPORATION	NA	Original value in 'species' column: catesbeinana	Rana catesbeiana	Rana catesbeiana
2000736900	RACA	amphibian	Amphibia	Rana	catesbeiana	NA	NA	BULLFROG	LIV	2000	NO	1029	TW	TW	T	W	C	C	2000-02-02	2000	2000-01-31	2000	I	NY	KIN YICK TRADING CORPORATION	ESTATE GALLEN INTERNATIONAL TRADE CO	Original value in 'species' column: catesbeinana	Rana catesbeiana	Rana catesbeiana
2000741557	ANCT	amphibian	Amphibia	NA	NA	NA	NON-CITES	AMPHIBIANS	LIV	102	NO	102	TZ	TZ	T	W	C	C	2000-01-31	2000	2000-01-31	2000	I	LA	BOSTON HIDES AND FURS LTD.	MOUTAIN BIRDS & REPTILES	NA	Na na	NA
2000824731	RABE	amphibian	Amphibia	Rana	berlandieri	NA	RIO GRANDE	FROG	LIV	350	KG	2233	MX	MX	T	W	C	C	2000-01-31	2000	2000-01-31	2000	I	BV	RANA LABORATORIES	ALVARO GARZA MONTALVO	NA	Rana berlandieri	Rana berlandieri
2000722395	LICA	amphibian	Amphibia	Litoria	caerulea	NA	WHITE'S TREE	FROG	LIV	500	NO	600	ID	ID	T	W	C	C	2000-02-01	2000	2000-02-01	2000	I	LA	L. A. REPTILE	FIRMA HASCO	NA	Litoria caerulea	Litoria caerulea
2000723255	GMON	amphibian	Amphibia	Gastrotheca	monticola	NA	MOUNTAIN MARSUPIAL	FROG	LIV	55	NO	187	PE	PE	T	W	C	C	2000-02-01	2000	2000-02-01	2000	I	LA	CALIFORNIA ZOOLOGICAL SUPPLY	PERU JUNGLE	NA	Gastrotheca monticola	Gastrotheca monticola
2000741824	RACA	amphibian	Amphibia	Rana	catesbeiana	NA	NA	BULLFROG	LIV	2000	NO	700	TW	TW	T	W	C	C	2000-02-14	2000	2000-02-01	2000	I	NY	HOY LUNG SEAFOOD CORPORATION	PENSETO SEAFOOD	Original value in 'species' column: catesbeinana	Rana catesbeiana	Rana catesbeiana
2000794964	RACA	amphibian	Amphibia	Rana	catesbeiana	NA	NA	BULLFROG	SPE	435	NO	550	MX	MX	T	W	C	C	2000-02-02	2000	2000-02-01	2000	I	NG	RANACO CORPORATION	P.AM.E.E.S.A.	Original value in 'species' column: catesbeinana	Rana catesbeiana	Rana catesbeiana
2000794964	RAFO	amphibian	Amphibia	Rana	forreri	NA	FORRER'S GRASS	FROG	SPE	6960	NO	3780	MX	MX	T	W	C	C	2000-02-02	2000	2000-02-01	2000	I	NG	RANACO CORPORATION	P.AM.E.E.S.A.	NA	Rana forreri	Rana forreri
2000113326	BMAR	amphibian	Amphibia	Bufo	marinus	NA	NEOTROPICAL	TOAD	LIV	1	NO	0	EC	EC	T	W	R	S	2000-03-04	2000	2000-02-02	2000	I	MI	BURGUNDY REPTILE TRADERS	NA	NA	Bufo marinus	NA
2000723503	ANCT	amphibian	Amphibia	NA	NA	NA	NON-CITES	AMPHIBIANS	LIV	200	NO	300	TG	TG	T	W	C	C	2000-02-02	2000	2000-02-02	2000	I	LA	L. A. REPTILE	NA	NA	Na na	NA
2000736249	XELA	amphibian	Amphibia	Xenopus	laevis	NA	AFRICAN CLAWED	TOAD	LIV	1300	NO	4420	CL	CL	T	W	C	C	2000-02-03	2000	2000-02-02	2000	I	CH	XENOPUS I, INC.	CARLOS DEL RIO CAMUS	NA	Xenopus laevis	Xenopus laevis
2000736410	RACA	amphibian	Amphibia	Rana	catesbeiana	NA	NA	BULLFROG	LIV	1428	NO	416	DO	DO	T	W	C	C	2000-02-04	2000	2000-02-02	2000	I	NY	NORTH SEA TRADING CORPORATION	NA	Original value in 'species' column: catesbeinana	Rana catesbeiana	Rana catesbeiana
2000736510	RACA	amphibian	Amphibia	Rana	catesbeiana	NA	NA	BULLFROG	LIV	5400	NO	304	DO	DO	T	W	C	C	2000-02-28	2000	2000-02-02	2000	I	NY	KIN YICK TRADING CORPORATION	EXPORTADOR GONZALEZ	Original value in 'species' column: catesbeinana	Rana catesbeiana	Rana catesbeiana
2000741610	MAAU	amphibian	Amphibia	Mantella	aurantiaca	NA	MALAGASY GOLDEN	MANTELLA	LIV	50	NO	250	MG	MG	T	W	C	C	2000-02-02	2000	2000-02-02	2000	I	LA	REPTILE SPECIALTIES	SOAFIAVY EXPORT	NA	Mantella aurantiaca	Mantella aurantiaca
2000745251	ANCT	amphibian	Amphibia	NA	NA	NA	NON-CITES	AMPHIBIANS	LIV	2000	NO	100	VS	HK	T	W	C	C	2000-02-02	2000	2000-02-02	2000	I	AT	FINN'S AQUATICS INC.	FORTUNE WIDE ASIA	NA	Na na	NA
2000802290	DYIN	amphibian	Amphibia	Dyscophus	insularis	NA	ANTSOUHY TOMATO	FROG	LIV	20	NO	170	MG	MG	T	U	C	C	2000-02-02	2000	2000-02-02	2000	I	MI	GLADES HERP	SOAFIAVY EXPORT	NA	Dyscophus insularis	Dyscophus insularis
2000802290	MAAU	amphibian	Amphibia	Mantella	aurantiaca	NA	MALAGASY GOLDEN	MANTELLA	LIV	100	NO	500	MG	MG	T	W	C	C	2000-02-02	2000	2000-02-02	2000	I	MI	GLADES HERP	SOAFIAVY EXPORT	NA	Mantella aurantiaca	Mantella aurantiaca
2000802290	MANV	amphibian	Amphibia	Mantella	viridis	NA	GREEN GOLDEN	MANTELLA	LIV	12	NO	60	MG	MG	T	U	C	C	2000-02-02	2000	2000-02-02	2000	I	MI	GLADES HERP	SOAFIAVY EXPORT	NA	Mantella viridis	Mantella viridis
2000802290	MCRO	amphibian	Amphibia	Mantella	crocea	NA	EASTERN GOLDEN	MANTELLA	LIV	25	NO	150	MG	MG	T	U	C	C	2000-02-02	2000	2000-02-02	2000	I	MI	GLADES HERP	SOAFIAVY EXPORT	NA	Mantella crocea	Mantella crocea
2000802290	MNLA	amphibian	Amphibia	Mantella	laevigata	NA	FOLOHY GOLDEN	MANTELLA	LIV	12	NO	72	MG	MG	T	U	C	C	2000-02-02	2000	2000-02-02	2000	I	MI	GLADES HERP	SOAFIAVY EXPORT	NA	Mantella laevigata	Mantella laevigata
2000722408	RACA	amphibian	Amphibia	Rana	catesbeiana	NA	NA	BULLFROG	LEG	10886	KG	65320	TW	TW	T	NA	C	C	2000-02-07	2000	2000-02-03	2000	I	LA	BEAVER STREET FISHERIES, INC.	FOREVER FROZEN SEAFOODS	Original value in 'species' column: catesbeinana	Rana catesbeiana	Rana catesbeiana
2000730972	RACA	amphibian	Amphibia	Rana	catesbeiana	NA	NA	BULLFROG	LIV	150	KG	987	TW	TW	T	W	C	C	2000-02-24	2000	2000-02-03	2000	I	NY	KIN YICK TRADING CORPORATION	ESTATE GALLEY INTL TRADE	Original value in 'species' column: catesbeinana	Rana catesbeiana	Rana catesbeiana
2000730973	RACA	amphibian	Amphibia	Rana	catesbeiana	NA	NA	BULLFROG	LIV	150	KG	1029	TW	TW	T	W	C	C	2000-02-24	2000	2000-02-03	2000	I	NY	KIN YICK TRADING CORPORATION	ESTATE GALLEY INTL	Original value in 'species' column: catesbeinana	Rana catesbeiana	Rana catesbeiana
2000743475	RMAC	amphibian	Amphibia	Rana	macrodon	NA	NA	BULLFROG	LEG	18371	KG	71814	VN	VN	T	W	C	C	2000-02-04	2000	2000-02-03	2000	I	BO	INTEROCEAN INC.	CANTHO AGRICULTURAL & ANIMAL PROD.	NA	Rana macrodon	NA
2000789415	RACA	amphibian	Amphibia	Rana	catesbeiana	NA	NA	BULLFROG	LIV	5000	NO	128	DO	DO	T	C	C	C	2000-02-17	2000	2000-02-03	2000	I	NW	TIN TIN FISH TRADING INC.	LIVE FROGS	Original value in 'species' column: catesbeinana	Rana catesbeiana	Rana catesbeiana
2000739461	LICA	amphibian	Amphibia	Litoria	caerulea	NA	WHITE'S TREE	FROG	LIV	200	NO	300	ID	ID	T	W	C	C	2000-02-04	2000	2000-02-04	2000	I	LA	R. H. PET INCORPORATED	FIRMA HASCO	NA	Litoria caerulea	Litoria caerulea
2000739461	MENA	amphibian	Amphibia	Megophrys	nasuta	NA	SPADEFOOT	TOAD	LIV	50	NO	250	ID	ID	T	W	C	C	2000-02-04	2000	2000-02-04	2000	I	LA	R. H. PET INCORPORATED	FIRMA HASCO	NA	Megophrys nasuta	Pelobatrachus nasuta
2000802801	CECW	amphibian	Amphibia	Ceratophrys	cranwelli	NA	CRANWELL'S HORNED	FROG	LIV	16	NO	1600	PY	PY	T	U	C	C	2000-02-04	2000	2000-02-04	2000	I	MI	GAMA SUPPLIERS, INC.	WALTER GOMEZ	NA	Ceratophrys cranwelli	Ceratophrys cranwelli
2000802801	PHSA	amphibian	Amphibia	Phyllomedusa	sauvagii	NA	PAINT-BELLY MONKEY	FROG	LIV	95	NO	95	PY	PY	T	U	C	C	2000-02-04	2000	2000-02-04	2000	I	MI	GAMA SUPPLIERS, INC.	WALTER GOMEZ	NA	Phyllomedusa sauvagii	Phyllomedusa sauvagii
2000722584	LICA	amphibian	Amphibia	Litoria	caerulea	NA	WHITE'S TREE	FROG	LIV	1464	NO	2196	ID	ID	T	W	C	C	2000-02-05	2000	2000-02-05	2000	I	LA	AQUA-NAUTIC SPECIALIST	PT BEKAEL ESKA GEMILANG JL	NA	Litoria caerulea	Litoria caerulea
2000722700	TRRO	amphibian	Amphibia	Trichobatrachus	robustus	NA	HAIRY	FROG	LIV	2637	NO	1580	ID	ID	T	W	C	C	2000-02-05	2000	2000-02-05	2000	I	LA	AQUACO, INC.	CV CITRA NUGANTARA ABADI	NA	Trichobatrachus robustus	Trichobatrachus robustus
2000731103	HYMC	amphibian	Amphibia	Hymenochirus	curtipes	NA	W. DWARF CLAWED	FROG	LIV	600	NO	120	HK	HK	T	W	C	C	2000-02-07	2000	2000-02-05	2000	I	NY	ERDA INC.	BROTHER AQUARIUM	NA	Hymenochirus curtipes	Hymenochirus curtipes
2000743231	BOOR	amphibian	Amphibia	Bombina	orientalis	NA	ORIENTAL FIREBELLY	TOAD	LIV	60	NO	13	HK	HK	T	W	C	C	2000-02-08	2000	2000-02-05	2000	I	NY	BOZMAN IMPORTS LTD.	UNION TROPICAL FISH FARM	NA	Bombina orientalis	Bombina orientalis
2000743231	CYOR	amphibian	Amphibia	Cynops	orientalis	NA	CHINESE DWARF	NEWT	LIV	125	NO	53	HK	HK	T	W	C	C	2000-02-08	2000	2000-02-05	2000	I	NY	BOZMAN IMPORTS LTD.	UNION TROPICAL FISH FARM	NA	Cynops orientalis	Cynops orientalis
2000743231	XELA	amphibian	Amphibia	Xenopus	laevis	NA	AFRICAN CLAWED	TOAD	LIV	1000	NO	180	HK	HK	T	W	C	C	2000-02-08	2000	2000-02-05	2000	I	NY	BOZMAN IMPORTS LTD.	UNION TROPICAL FISH FARM	NA	Xenopus laevis	Xenopus laevis
2000723033	HYMC	amphibian	Amphibia	Hymenochirus	curtipes	NA	W. DWARF CLAWED	FROG	LIV	3600	NO	826	HK	HK	T	W	C	C	2000-02-06	2000	2000-02-06	2000	I	LA	AQUACO, INC.	DRAGON FISHERIES	NA	Hymenochirus curtipes	Hymenochirus curtipes
2000730561	OOLI	amphibian	Amphibia	Occidozyga	lima	NA	PADDY	FROG	LIV	75	NO	7	ID	ID	T	W	C	C	2000-02-09	2000	2000-02-06	2000	I	NY	BOZMAN IMPORTS LTD.	VIAJAYA INTERNATIONAL	Original value in 'genus' column: ooedozyga	Occidozyga lima	Occidozyga lima
2000734619	HYMC	amphibian	Amphibia	Hymenochirus	curtipes	NA	W. DWARF CLAWED	FROG	LIV	400	NO	68	CN	CN	NA	W	C	C	2000-02-07	2000	2000-02-06	2000	I	NY	TRI-COUNTY TROPICALS, INC.	CORNWALL AQUATICS	NA	Hymenochirus curtipes	Hymenochirus curtipes
2000737249	RMAC	amphibian	Amphibia	Rana	macrodon	NA	NA	BULLFROG	SKI	67	NO	462	ID	FR	T	W	C	C	2000-02-08	2000	2000-02-06	2000	I	DF	ROGGWILLER TANNERY OF LOUISIANA	TANNERIES DES CUIRS D'INDOCHINE ET DE MADAGASCAR	NA	Rana macrodon	NA
2000739958	CYOR	amphibian	Amphibia	Cynops	orientalis	NA	CHINESE DWARF	NEWT	LIV	7500	NO	725	CN	CN	T	W	C	C	2000-02-06	2000	2000-02-06	2000	I	LA	DOLPHIN INTERNATIONAL	SHANGHAI GOLDEN FIELD GARDENING CO LTD	NA	Cynops orientalis	Cynops orientalis
2000739958	PACB	amphibian	Amphibia	Pachytriton	brevipes	NA	TSITOU	NEWT	LIV	100	NO	42	CN	CN	T	W	C	C	2000-02-06	2000	2000-02-06	2000	I	LA	DOLPHIN INTERNATIONAL	SHANGHAI GOLDEN FIELD GARDENING CO LTD	NA	Pachytriton brevipes	Pachytriton brevipes
2000739961	HYMC	amphibian	Amphibia	Hymenochirus	curtipes	NA	W. DWARF CLAWED	FROG	LIV	2800	NO	2800	HK	HK	T	W	C	C	2000-02-06	2000	2000-02-06	2000	I	LA	DOLPHIN INTERNATIONAL	SANWOO FISHERIES	NA	Hymenochirus curtipes	Hymenochirus curtipes
2000739961	TYVE	amphibian	Amphibia	Tylototriton	verrucosus	NA	CROCODILE	NEWT	LIV	900	NO	900	HK	HK	T	W	C	C	2000-02-06	2000	2000-02-06	2000	I	LA	DOLPHIN INTERNATIONAL	SANWOO FISHERIES	NA	Tylototriton verrucosus	Tylototriton verrucosus
2000739968	HYMC	amphibian	Amphibia	Hymenochirus	curtipes	NA	W. DWARF CLAWED	FROG	LIV	1800	NO	144	ID	ID	T	W	C	C	2000-02-06	2000	2000-02-06	2000	I	LA	DOLPHIN INTERNATIONAL	PT VIVARIA INDONESIA	NA	Hymenochirus curtipes	Hymenochirus curtipes
2000739968	LICA	amphibian	Amphibia	Litoria	caerulea	NA	WHITE'S TREE	FROG	LIV	40	NO	80	ID	ID	T	W	C	C	2000-02-06	2000	2000-02-06	2000	I	LA	DOLPHIN INTERNATIONAL	PT VIVARIA INDONESIA	NA	Litoria caerulea	Litoria caerulea
2000739493	KASE	amphibian	Amphibia	Kassina	senegalensis	NA	SENEGAL RUNNING	FROG	LIV	300	NO	150	TZ	TZ	T	W	C	C	2000-02-07	2000	2000-02-07	2000	I	LA	CALIFORNIA ZOOLOGICAL SUPPLY	M.T. CANDIDA	NA	Kassina senegalensis	Kassina senegalensis
2000740162	PBIF	amphibian	Amphibia	Phrynomantis	bifasciatus	NA	S AFR SNAKE-NECK	FROG	LIV	300	NO	150	TZ	TZ	T	W	C	C	2000-02-07	2000	2000-02-07	2000	I	LA	L. A. REPTILE	KISASE INV	NA	Phrynomantis bifasciatus	Phrynomantis bifasciatus
2000741822	RACA	amphibian	Amphibia	Rana	catesbeiana	NA	NA	BULLFROG	LIV	3000	NO	945	TW	TW	T	W	C	C	2000-02-14	2000	2000-02-07	2000	I	NY	HOY LUNG SEAFOOD CORPORATION	HORRIE FISHERY CO	Original value in 'species' column: catesbeinana	Rana catesbeiana	Rana catesbeiana
2000794981	RACA	amphibian	Amphibia	Rana	catesbeiana	NA	NA	BULLFROG	SPE	2870	NO	1760	MX	MX	T	W	C	C	2000-02-08	2000	2000-02-07	2000	I	NG	RANACO CORPORATION	P.A.M.E.E.S.A.	Original value in 'species' column: catesbeinana	Rana catesbeiana	Rana catesbeiana
2000794981	RAFO	amphibian	Amphibia	Rana	forreri	NA	FORRER'S GRASS	FROG	SPE	50	NO	90	MX	MX	T	W	C	C	2000-02-08	2000	2000-02-07	2000	I	NG	RANACO CORPORATION	P.A.M.E.E.S.A.	NA	Rana forreri	Rana forreri
2000742048	ANCT	amphibian	Amphibia	NA	NA	NA	NON-CITES	AMPHIBIANS	LIV	3	NO	3	ZR	ZR	T	W	C	C	2000-02-08	2000	2000-02-08	2000	I	LA	CALIFORNIA ZOOLOGICAL SUPPLY	EXOTROPICS	NA	Na na	NA
2000731730	RMAC	amphibian	Amphibia	Rana	macrodon	NA	NA	BULLFROG	SHO	6	NO	153	ID	IT	T	W	C	C	2000-02-14	2000	2000-02-09	2000	I	NY	PRADA USA CORP.	I PELLETTIERI D'ITALIA SPA	NA	Rana macrodon	NA
2000749988	RACA	amphibian	Amphibia	Rana	catesbeiana	NA	NA	BULLFROG	LIV	709	KG	4010	DO	DO	T	W	C	C	2000-02-11	2000	2000-02-09	2000	I	NY	TIN TIN FISH TRADING INC.	LIVE FROGS DOMINICA S.A.	Original value in 'species' column: catesbeinana	Rana catesbeiana	Rana catesbeiana
2000738366	RACA	amphibian	Amphibia	Rana	catesbeiana	NA	NA	BULLFROG	LIV	1800	NO	514	DO	DO	T	W	C	C	2000-03-08	2000	2000-02-10	2000	I	NW	NORTH SEA TRADING CORPORATION	HECTOR ANT. TORO	Original value in 'species' column: catesbeinana	Rana catesbeiana	Rana catesbeiana
2000739849	LIAU	amphibian	Amphibia	Litoria	aurea	NA	GREEN & GOLD BELL	FROG	LIV	2000	NO	1966	NZ	NZ	T	W	C	C	2000-02-10	2000	2000-02-10	2000	I	LA	CALIFORNIA ZOOLOGICAL SUPPLY	BURBANK GOLDFISH	NA	Litoria aurea	Litoria aurea
2000788944	RACA	amphibian	Amphibia	Rana	catesbeiana	NA	NA	BULLFROG	LIV	1059	KG	1006	EC	EC	T	C	C	C	2000-08-29	2000	2000-02-10	2000	I	NW	KIN YICK TRADING CORPORATION	ASOCIACIR DE PRODUCTORES	Original value in 'species' column: catesbeinana	Rana catesbeiana	Rana catesbeiana
2000735697	RACA	amphibian	Amphibia	Rana	catesbeiana	NA	NA	BULLFROG	LIV	10000	KG	34564	TW	TW	T	C	C	C	2000-02-11	2000	2000-02-11	2000	I	SF	NOR-CAL SEAFOOD INC.	PENSETO SEAFOOD COMPANY LTD	Original value in 'species' column: catesbeinana	Rana catesbeiana	Rana catesbeiana
2000735959	BOOR	amphibian	Amphibia	Bombina	orientalis	NA	ORIENTAL FIREBELLY	TOAD	LIV	50	NO	400	JP	JP	non-standard value	C	C	C	2000-02-11	2000	2000-02-11	2000	I	CH	NA	NA	Original value in 'purpose' column: N	Bombina orientalis	Bombina orientalis
2000727358	RACA	amphibian	Amphibia	Rana	catesbeiana	NA	NA	BULLFROG	LIV	450	KG	292	DO	DO	T	C	C	C	2000-02-10	2000	2000-02-12	2000	I	NW	TIN TIN FISH TRADING INC.	LIVE FROGS DOMINICA, S.A.	Original value in 'species' column: catesbeinana	Rana catesbeiana	Rana catesbeiana
2000739309	HYMC	amphibian	Amphibia	Hymenochirus	curtipes	NA	W. DWARF CLAWED	FROG	LIV	1400	NO	460	SG	SG	T	W	C	C	2000-02-12	2000	2000-02-12	2000	I	LA	AQUA-NAUTIC SPECIALIST	AQUANAUTICS SPECIALIST PTE LIMITED	NA	Hymenochirus curtipes	Hymenochirus curtipes
2000741855	HYMC	amphibian	Amphibia	Hymenochirus	curtipes	NA	W. DWARF CLAWED	FROG	LIV	450	NO	85	HK	HK	T	W	C	C	2000-02-14	2000	2000-02-12	2000	I	NY	ERDA INC.	BROTHER AQUARIUM	NA	Hymenochirus curtipes	Hymenochirus curtipes
2000820634	XELA	amphibian	Amphibia	Xenopus	laevis	NA	AFRICAN CLAWED	TOAD	LIV	750	NO	113	HK	HK	T	W	C	C	2000-02-15	2000	2000-02-12	2000	I	NY	BOZMAN IMPORTS LTD.	UNION TROPICAL FISH FARM	NA	Xenopus laevis	Xenopus laevis
2000739251	HYMB	amphibian	Amphibia	Hymenochirus	boettgeri	NA	ZAIRE DWARF CLAWED	FROG	LIV	300	NO	33	HK	HK	T	W	C	C	2000-02-13	2000	2000-02-13	2000	I	LA	GLOBAL AQUATIC CONSULTING	BOKO EXPRESS COMPANY	NA	Hymenochirus boettgeri	Hymenochirus boettgeri
2000739798	CYOR	amphibian	Amphibia	Cynops	orientalis	NA	CHINESE DWARF	NEWT	LIV	6300	NO	573	CN	CN	T	W	C	C	2000-02-13	2000	2000-02-13	2000	I	LA	DOLPHIN INTERNATIONAL	SHANGHAI GOLDEN FIELD GARDENING CO LTD	NA	Cynops orientalis	Cynops orientalis
2000739800	CYOR	amphibian	Amphibia	Cynops	orientalis	NA	CHINESE DWARF	NEWT	LIV	450	NO	117	HK	HK	T	W	C	C	2000-02-13	2000	2000-02-13	2000	I	LA	DOLPHIN INTERNATIONAL	SANWOO FISHERIES	NA	Cynops orientalis	Cynops orientalis
2000739800	HYMC	amphibian	Amphibia	Hymenochirus	curtipes	NA	W. DWARF CLAWED	FROG	LIV	3640	NO	437	HK	HK	T	W	C	C	2000-02-13	2000	2000-02-13	2000	I	LA	DOLPHIN INTERNATIONAL	SANWOO FISHERIES	NA	Hymenochirus curtipes	Hymenochirus curtipes
2000739810	HYMC	amphibian	Amphibia	Hymenochirus	curtipes	NA	W. DWARF CLAWED	FROG	LIV	900	NO	72	ID	ID	T	W	C	C	2000-02-13	2000	2000-02-13	2000	I	LA	DOLPHIN INTERNATIONAL	PT VIVARIA INDONESIA	NA	Hymenochirus curtipes	Hymenochirus curtipes
2000739810	OOLI	amphibian	Amphibia	Occidozyga	lima	NA	PADDY	FROG	LIV	900	NO	63	ID	ID	T	W	C	C	2000-02-13	2000	2000-02-13	2000	I	LA	DOLPHIN INTERNATIONAL	PT VIVARIA INDONESIA	Original value in 'genus' column: ooedozyga	Occidozyga lima	Occidozyga lima
2000740171	HYMB	amphibian	Amphibia	Hymenochirus	boettgeri	NA	ZAIRE DWARF CLAWED	FROG	LIV	625	NO	206	HK	HK	T	W	C	C	2000-02-13	2000	2000-02-13	2000	I	LA	TROPICAL ENTERPRISES	CEYLON AQUARIUM	NA	Hymenochirus boettgeri	Hymenochirus boettgeri
2000742064	RLEU	amphibian	Amphibia	Rhacophorus	leucomystax	NA	FLYING	FROG	LIV	476	NO	190	VN	VN	T	W	C	C	2000-02-13	2000	2000-02-13	2000	I	LA	UNIVERSAL AQUATIC	CORIMEX	NA	Rhacophorus leucomystax	NA
2000742874	OOLI	amphibian	Amphibia	Occidozyga	lima	NA	PADDY	FROG	LIV	150	NO	14	ID	ID	T	W	C	C	2000-02-16	2000	2000-02-13	2000	I	NY	BOZMAN IMPORTS LTD.	VIAJAYA INTERNATIONAL	Original value in 'genus' column: ooedozyga	Occidozyga lima	Occidozyga lima
2000741825	RACA	amphibian	Amphibia	Rana	catesbeiana	NA	NA	BULLFROG	LIV	2000	NO	700	TW	TW	T	W	C	C	2000-02-18	2000	2000-02-14	2000	I	NY	HOY LUNG SEAFOOD CORPORATION	HORREI FISHERY CO	Original value in 'species' column: catesbeinana	Rana catesbeiana	Rana catesbeiana
2000824729	RABE	amphibian	Amphibia	Rana	berlandieri	NA	RIO GRANDE	FROG	LIV	350	KG	2233	MX	MX	T	W	C	C	2000-02-14	2000	2000-02-14	2000	I	BV	RANA LABORATORIES	ALVARO GARZA MONTALVO	NA	Rana berlandieri	Rana berlandieri
2000788737	RACA	amphibian	Amphibia	Rana	catesbeiana	NA	NA	BULLFROG	LIV	1077	KG	1077	EC	EC	T	C	C	C	2000-08-28	2000	2000-02-15	2000	I	NW	KIN YICK TRADING CORPORATION	ASOCIACOIONDE PRODUCTORES	Original value in 'species' column: catesbeinana	Rana catesbeiana	Rana catesbeiana
2000830564	RACA	amphibian	Amphibia	Rana	catesbeiana	NA	NA	BULLFROG	LIV	3030	NO	5529	GT	GT	T	U	C	C	2000-02-15	2000	2000-02-15	2000	I	MI	AQUALAND, INC.	PRODUCTOS ACUICOLAS DE GUATEMALA	Original value in 'species' column: catesbeinana	Rana catesbeiana	Rana catesbeiana
2000730994	ANCT	amphibian	Amphibia	NA	NA	NA	NON-CITES	AMPHIBIANS	LIV	200	NO	10	CN	CN	T	W	C	C	2000-02-23	2000	2000-02-16	2000	I	NY	MIN HUA ENTERPRISE, INC.	SHANGHAI ESWELL ENTERPRISE	NA	Na na	NA
2000739875	KALO	amphibian	Amphibia	Kaloula	pulchra	NA	ASIATIC PAINTED	FROG	LIV	80	NO	12	TH	TH	T	W	C	C	2000-02-16	2000	2000-02-16	2000	I	LA	PETS INTERNATIONAL	ASIA WORLD WIDE	NA	Kaloula pulchra	Kaloula pulchra
2000749850	RACA	amphibian	Amphibia	Rana	catesbeiana	NA	NA	BULLFROG	LIV	3000	NO	1029	TW	TW	T	W	C	C	2000-02-16	2000	2000-02-16	2000	I	NY	KIN YICK TRADING CORPORATION	ESTATE GALLEN INTERNATIONAL TRADE CO	Original value in 'species' column: catesbeinana	Rana catesbeiana	Rana catesbeiana
2000754409	RACA	amphibian	Amphibia	Rana	catesbeiana	NA	NA	BULLFROG	LIV	1080	NO	315	DO	DO	T	C	C	C	2000-04-20	2000	2000-02-16	2000	I	NW	NORTH SEA TRADING CORPORATION	NA	Original value in 'species' column: catesbeinana	Rana catesbeiana	Rana catesbeiana
2000788726	RACA	amphibian	Amphibia	Rana	catesbeiana	NA	NA	BULLFROG	LIV	1080	NO	315	DO	DO	T	C	C	C	2000-08-29	2000	2000-02-16	2000	I	NW	NORTH SEA TRADING CORPORATION	HECTOR ANT. TORO	Original value in 'species' column: catesbeinana	Rana catesbeiana	Rana catesbeiana
2000805154	ANCT	amphibian	Amphibia	NA	NA	NA	NON-CITES	AMPHIBIANS	LIV	200	NO	300	TG	TG	T	W	C	C	2000-02-16	2000	2000-02-16	2000	I	LA	L. A. REPTILE	PAJAR SARL	NA	Na na	NA
2000113328	BMAR	amphibian	Amphibia	Bufo	marinus	NA	NEOTROPICAL	TOAD	LIV	1	NO	1	EC	EC	T	W	C	C	2000-03-20	2000	2000-02-17	2000	I	MI	BURGUNDY REPTILE TRADERS	NA	NA	Bufo marinus	NA
2000739482	PBIF	amphibian	Amphibia	Phrynomantis	bifasciatus	NA	S AFR SNAKE-NECK	FROG	LIV	500	NO	1000	GH	GH	T	W	C	C	2000-02-17	2000	2000-02-17	2000	I	LA	CALIFORNIA ZOOLOGICAL SUPPLY	BASIL ARYEETEY	NA	Phrynomantis bifasciatus	Phrynomantis bifasciatus
2000740136	KALO	amphibian	Amphibia	Kaloula	pulchra	NA	ASIATIC PAINTED	FROG	LIV	54	NO	162	MY	MY	T	W	C	C	2000-02-17	2000	2000-02-17	2000	I	LA	L. A. REPTILE	CBS WILDLIFE	NA	Kaloula pulchra	Kaloula pulchra
2000740136	LHAS	amphibian	Amphibia	Leptobrachium	hasseltii	NA	JAVA SPADEFOOT	TOAD	LIV	73	NO	219	MY	MY	T	W	C	C	2000-02-17	2000	2000-02-17	2000	I	LA	L. A. REPTILE	CBS WILDLIFE	NA	Leptobrachium hasseltii	Leptobrachium hasseltii
2000740136	MENA	amphibian	Amphibia	Megophrys	nasuta	NA	SPADEFOOT	TOAD	LIV	113	NO	847	MY	MY	T	W	C	C	2000-02-17	2000	2000-02-17	2000	I	LA	L. A. REPTILE	CBS WILDLIFE	NA	Megophrys nasuta	Pelobatrachus nasuta
2000740136	PEHO	amphibian	Amphibia	Pedostibes	hosii	NA	BOULEN. ASIAN TREE	TOAD	LIV	16	NO	440	MY	MY	T	W	C	C	2000-02-17	2000	2000-02-17	2000	I	LA	L. A. REPTILE	CBS WILDLIFE	NA	Pedostibes hosii	Rentapia hosii
2000741815	RANC	amphibian	Amphibia	Rana	clamitans	NA	GREEN	FROG	MEA	4725	KG	7700	VN	VN	T	C	C	C	2000-02-16	2000	2000-02-17	2000	I	LA	COUNTRY FLAVOR CORP.	NHAN HOA COMPANY, LTD.	NA	Rana clamitans	Rana clamitans
2000760419	RACA	amphibian	Amphibia	Rana	catesbeiana	NA	NA	BULLFROG	LEG	1177	KG	123585	CN	CN	T	W	C	C	2000-02-22	2000	2000-02-17	2000	I	HN	SO T. CHEA/CHEA, INC.	SHANTOU S.E.Z. YANGFENG MARINE PROD. CO	Original value in 'species' column: catesbeinana	Rana catesbeiana	Rana catesbeiana
2000727353	RACA	amphibian	Amphibia	Rana	catesbeiana	NA	NA	BULLFROG	LIV	580	KG	313	DO	DO	T	C	C	C	2000-02-10	2000	2000-02-18	2000	I	NW	TIN TIN FISH TRADING INC.	LIVE FROGS DOMINICA, S.A.	Original value in 'species' column: catesbeinana	Rana catesbeiana	Rana catesbeiana
2000732371	RACA	amphibian	Amphibia	Rana	catesbeiana	NA	NA	BULLFROG	LIV	3000	NO	945	TW	TW	T	W	C	C	2000-02-21	2000	2000-02-18	2000	I	NY	HOY LUNG SEAFOOD CORPORATION	HOCREI FISHERY COMPANY	Original value in 'species' column: catesbeinana	Rana catesbeiana	Rana catesbeiana
2000733503	RACA	amphibian	Amphibia	Rana	catesbeiana	NA	NA	BULLFROG	LIV	290	NO	1160	DO	DO	T	W	C	C	2000-02-29	2000	2000-02-18	2000	I	NY	TIN TIN FISH TRADING INC.	LINE FROGS	Original value in 'species' column: catesbeinana	Rana catesbeiana	Rana catesbeiana
2000737337	LICA	amphibian	Amphibia	Litoria	caerulea	NA	WHITE'S TREE	FROG	LIV	250	NO	775	ID	ID	T	W	C	C	2000-02-18	2000	2000-02-18	2000	I	DF	TEPEDELEN, KAMURAN	CV TERRARIA INDONESIA	NA	Litoria caerulea	Litoria caerulea
2000794932	RACA	amphibian	Amphibia	Rana	catesbeiana	NA	NA	BULLFROG	SPE	8870	NO	5236	MX	MX	T	W	C	C	2000-02-18	2000	2000-02-18	2000	I	NG	RANACO CORPORATION	P.A.M.E.E.S.A.	Original value in 'species' column: catesbeinana	Rana catesbeiana	Rana catesbeiana
2000794932	RAFO	amphibian	Amphibia	Rana	forreri	NA	FORRER'S GRASS	FROG	SPE	156	NO	180	MX	MX	T	W	C	C	2000-02-18	2000	2000-02-18	2000	I	NG	RANACO CORPORATION	P.A.M.E.E.S.A.	NA	Rana forreri	Rana forreri
2000167405	PBIF	amphibian	Amphibia	Phrynomantis	bifasciatus	NA	S AFR SNAKE-NECK	FROG	LIV	185	NO	278	TZ	TZ	T	W	C	C	2000-02-19	2000	2000-02-19	2000	I	MI	GLOBAL IMPORT/EXPORTS	KOORI INVESTMENT	NA	Phrynomantis bifasciatus	Phrynomantis bifasciatus
2000739415	HYMC	amphibian	Amphibia	Hymenochirus	curtipes	NA	W. DWARF CLAWED	FROG	LIV	1500	NO	600	SG	SG	T	W	C	C	2000-02-19	2000	2000-02-19	2000	I	LA	AQUA-NAUTIC SPECIALIST	AQUANAUTICS SPECIALIST PTE LTD	NA	Hymenochirus curtipes	Hymenochirus curtipes
2000739420	HYMC	amphibian	Amphibia	Hymenochirus	curtipes	NA	W. DWARF CLAWED	FROG	LIV	2003	NO	3324	ID	ID	T	W	C	C	2000-02-19	2000	2000-02-19	2000	I	LA	AQUA-NAUTIC SPECIALIST	PT BEKAEL ESKA GEMILANG	NA	Hymenochirus curtipes	Hymenochirus curtipes
2000739978	CEGU	amphibian	Amphibia	Ceratobatrachus	guentheri	NA	GUNTHER'S TRIANGLE	FROG	LIV	120	NO	240	SB	SB	T	W	C	C	2000-02-19	2000	2000-02-19	2000	I	LA	L. A. REPTILE	JINNEY ETE	NA	Ceratobatrachus guentheri	NA
2000750771	XELA	amphibian	Amphibia	Xenopus	laevis	NA	AFRICAN CLAWED	TOAD	LIV	2125	NO	319	HK	HK	T	W	C	C	2000-02-23	2000	2000-02-19	2000	I	NY	BOZMAN IMPORTS LTD.	UNION TROPICAL FISH FARM	NA	Xenopus laevis	Xenopus laevis
2000793357	XELA	amphibian	Amphibia	Xenopus	laevis	NA	AFRICAN CLAWED	TOAD	LIV	280	NO	56	NG	NG	T	W	C	C	2000-02-19	2000	2000-02-19	2000	I	NW	GLOBAL TROPICAL RESOURCES INC.	SPIUAP NIGERIA LTD.	NA	Xenopus laevis	Xenopus laevis
2000726557	RMAC	amphibian	Amphibia	Rana	macrodon	NA	NA	BULLFROG	LPS	2	NO	14	AU	IT	T	W	C	C	2000-02-25	2000	2000-02-20	2000	I	NY	ALLFURS	ITALHIDE	NA	Rana macrodon	NA
2000732347	OOLI	amphibian	Amphibia	Occidozyga	lima	NA	PADDY	FROG	LIV	225	NO	20	ID	ID	T	W	C	C	2000-02-23	2000	2000-02-20	2000	I	NY	BOZMAN IMPORTS LTD.	VIAJAYA INTERNATIONAL	Original value in 'genus' column: ooedozyga	Occidozyga lima	Occidozyga lima
2000738961	CYOR	amphibian	Amphibia	Cynops	orientalis	NA	CHINESE DWARF	NEWT	LIV	450	NO	117	HK	HK	T	W	C	C	2000-02-20	2000	2000-02-20	2000	I	LA	DOLPHIN INTERNATIONAL	SANWOO FISHERIES	NA	Cynops orientalis	Cynops orientalis
2000738961	HYMC	amphibian	Amphibia	Hymenochirus	curtipes	NA	W. DWARF CLAWED	FROG	LIV	3920	NO	470	HK	HK	T	W	C	C	2000-02-20	2000	2000-02-20	2000	I	LA	DOLPHIN INTERNATIONAL	SANWOO FISHERIES	NA	Hymenochirus curtipes	Hymenochirus curtipes
2000739038	LICA	amphibian	Amphibia	Litoria	caerulea	NA	WHITE'S TREE	FROG	LIV	25	NO	20	ID	ID	T	W	C	C	2000-02-20	2000	2000-02-20	2000	I	LA	DOLPHIN INTERNATIONAL	VIVAJAYA INTERNATIONAL	NA	Litoria caerulea	Litoria caerulea
2000739038	OOLI	amphibian	Amphibia	Occidozyga	lima	NA	PADDY	FROG	LIV	450	NO	18	ID	ID	T	W	C	C	2000-02-20	2000	2000-02-20	2000	I	LA	DOLPHIN INTERNATIONAL	VIVAJAYA INTERNATIONAL	Original value in 'genus' column: ooedozyga	Occidozyga lima	Occidozyga lima
2000739115	HYMC	amphibian	Amphibia	Hymenochirus	curtipes	NA	W. DWARF CLAWED	FROG	LIV	1800	NO	144	ID	ID	T	W	C	C	2000-02-20	2000	2000-02-20	2000	I	LA	DOLPHIN INTERNATIONAL	P T VIVARIA INDONESIA	NA	Hymenochirus curtipes	Hymenochirus curtipes
2000739115	LICA	amphibian	Amphibia	Litoria	caerulea	NA	WHITE'S TREE	FROG	LIV	350	NO	350	ID	ID	T	W	C	C	2000-02-20	2000	2000-02-20	2000	I	LA	DOLPHIN INTERNATIONAL	P T VIVARIA INDONESIA	NA	Litoria caerulea	Litoria caerulea
2000739115	LICA	amphibian	Amphibia	Litoria	caerulea	NA	WHITE'S TREE	FROG	LIV	40	NO	80	ID	ID	T	W	C	C	2000-02-20	2000	2000-02-20	2000	I	LA	DOLPHIN INTERNATIONAL	P T VIVARIA INDONESIA	NA	Litoria caerulea	Litoria caerulea
2000739115	LICA	amphibian	Amphibia	Litoria	caerulea	NA	WHITE'S TREE	FROG	LIV	30	NO	38	ID	ID	T	W	C	C	2000-02-20	2000	2000-02-20	2000	I	LA	DOLPHIN INTERNATIONAL	P T VIVARIA INDONESIA	NA	Litoria caerulea	Litoria caerulea
2000739115	OOLI	amphibian	Amphibia	Occidozyga	lima	NA	PADDY	FROG	LIV	1650	NO	166	ID	ID	T	W	C	C	2000-02-20	2000	2000-02-20	2000	I	LA	DOLPHIN INTERNATIONAL	P T VIVARIA INDONESIA	Original value in 'genus' column: ooedozyga	Occidozyga lima	Occidozyga lima
2000741102	HYMC	amphibian	Amphibia	Hymenochirus	curtipes	NA	W. DWARF CLAWED	FROG	LIV	1400	NO	516	SG	SG	T	W	C	C	2000-02-20	2000	2000-02-20	2000	I	LA	AQUA-NAUTIC SPECIALIST	AQUANAUTICS SPECIALIST PTE LTD.	NA	Hymenochirus curtipes	Hymenochirus curtipes
2000759256	HYMC	amphibian	Amphibia	Hymenochirus	curtipes	NA	W. DWARF CLAWED	FROG	LIV	2400	NO	548	HK	HK	T	W	C	C	2000-02-20	2000	2000-02-20	2000	I	LA	AQUACO, INC.	DRAGON FISHERIES	NA	Hymenochirus curtipes	Hymenochirus curtipes
2000167236	AGCL	amphibian	Amphibia	Agalychnis	callidryas	NA	RED-EYED TREE	FROG	LIV	300	NO	2100	NI	NI	T	C	C	C	2000-02-21	2000	2000-02-21	2000	I	MI	GAMA SUPPLIERS, INC.	ZOONICA S.A.	NA	Agalychnis callidryas	Agalychnis callidryas
2000732317	RACA	amphibian	Amphibia	Rana	catesbeiana	NA	NA	BULLFROG	LIV	1600	NO	459	DO	DO	T	W	C	C	2000-02-22	2000	2000-02-21	2000	I	NY	NORTH SEA TRADING CORPORATION	HECTOR TORO	Original value in 'species' column: catesbeinana	Rana catesbeiana	Rana catesbeiana
2000739922	RLEU	amphibian	Amphibia	Rhacophorus	leucomystax	NA	FLYING	FROG	LIV	280	NO	111	VN	VN	T	W	C	C	2000-02-21	2000	2000-02-21	2000	I	LA	L. A. REPTILE	CORIMEX	NA	Rhacophorus leucomystax	NA
2000737607	RACA	amphibian	Amphibia	Rana	catesbeiana	NA	NA	BULLFROG	LIV	1077	NO	1077	EC	EC	T	C	C	C	2000-03-03	2000	2000-02-22	2000	I	NW	KIN YICK TRADING CORPORATION	VIVACOCE Y CIA	Original value in 'species' column: catesbeinana	Rana catesbeiana	Rana catesbeiana
2000785801	XELA	amphibian	Amphibia	Xenopus	laevis	NA	AFRICAN CLAWED	TOAD	LIV	600	NO	1680	CL	CL	T	U	C	C	2000-02-22	2000	2000-02-22	2000	I	MI	XENOPUS EXPRESS	CARLOS F. DEL RIO CAMUS	NA	Xenopus laevis	Xenopus laevis
2000794604	RABE	amphibian	Amphibia	Rana	berlandieri	NA	RIO GRANDE	FROG	LIV	450	KG	2871	MX	MX	T	W	C	C	2000-02-22	2000	2000-02-22	2000	I	BV	RANA LABORATORIES	MONTALVO ALVARO GARZA	NA	Rana berlandieri	Rana berlandieri
2000738360	RACA	amphibian	Amphibia	Rana	catesbeiana	NA	NA	BULLFROG	LIV	740	KG	652	DO	DO	T	W	C	C	2000-03-05	2000	2000-02-23	2000	I	NW	TIN TIN FISH TRADING INC.	EXPORTADORA GONZALES S.A.	Original value in 'species' column: catesbeinana	Rana catesbeiana	Rana catesbeiana
2000779615	KASE	amphibian	Amphibia	Kassina	senegalensis	NA	SENEGAL RUNNING	FROG	LIV	100	NO	60	TZ	TZ	T	W	C	C	2000-03-06	2000	2000-02-23	2000	I	MI	GLOBAL TROPICAL IMPORT/EXPORT	GRECHANT TANZANIA LTD	NA	Kassina senegalensis	Kassina senegalensis
2000785669	PBIF	amphibian	Amphibia	Phrynomantis	bifasciatus	NA	S AFR SNAKE-NECK	FROG	LIV	100	NO	200	TG	TG	T	U	C	C	2000-02-24	2000	2000-02-23	2000	I	MI	SEGREST FARMS	PAJAR S A R L IMP/EXP	NA	Phrynomantis bifasciatus	Phrynomantis bifasciatus
2000900514	HYVI	amphibian	Amphibia	Hyperolius	viridiflavus	NA	COMMON REED	FROG	LIV	182	NO	182	TZ	TZ	T	U	C	C	2000-02-24	2000	2000-02-23	2000	I	MI	GLOBAL TROPICAL IMPORT/EXPORTS	AMANDLA ANIMAL FARM	NA	Hyperolius viridiflavus	Hyperolius viridiflavus
2000900514	KASE	amphibian	Amphibia	Kassina	senegalensis	NA	SENEGAL RUNNING	FROG	LIV	94	NO	117	TZ	TZ	T	U	C	C	2000-02-24	2000	2000-02-23	2000	I	MI	GLOBAL TROPICAL IMPORT/EXPORTS	AMANDLA ANIMAL FARM	NA	Kassina senegalensis	Kassina senegalensis
2000168041	SASA	amphibian	Amphibia	Salamandra	salamandra	NA	EUROPEAN FIRE	SALAMANDER	LIV	58	NO	485	GB	GB	T	W	C	C	2000-02-24	2000	2000-02-24	2000	I	MI	GLADES HERP, INC.	CHESSINGTON WORLD ADV.	NA	Salamandra salamandra	Salamandra salamandra
2000727286	XELA	amphibian	Amphibia	Xenopus	laevis	NA	AFRICAN CLAWED	TOAD	LIV	656	NO	90	CZ	CZ	T	C	C	C	2000-02-28	2000	2000-02-24	2000	I	NW	GLOBAL TROPICAL RESOURCES INC.	NA	NA	Xenopus laevis	Xenopus laevis
2000733725	BUME	amphibian	Amphibia	Bufo	melanostictus	NA	BLACK-SPINED	TOAD	LIV	300	NO	90	VN	VN	T	W	C	C	2000-02-25	2000	2000-02-24	2000	I	CH	VUNG TAU CATCHING FISHERY	GLOBAL TROPICAL REPTILES & FISH	NA	Bufo melanostictus	Duttaphrynus melanostictus
2000741687	RACA	amphibian	Amphibia	Rana	catesbeiana	NA	NA	BULLFROG	LIV	3000	NO	945	TW	TW	T	W	C	C	2000-03-03	2000	2000-02-24	2000	I	NY	HOY LUNG SEAFOOD CORPORATION	HORREI FISHERY CO	Original value in 'species' column: catesbeinana	Rana catesbeiana	Rana catesbeiana
2000790247	KALO	amphibian	Amphibia	Kaloula	pulchra	NA	ASIATIC PAINTED	FROG	LIV	29	NO	60	VN	VN	T	W	C	C	2000-02-24	2000	2000-02-24	2000	I	MI	FRANKLIN, CAROL	V.C.S. CORPS	NA	Kaloula pulchra	Kaloula pulchra
2000790247	RNIG	amphibian	Amphibia	Rhacophorus	nigropalmatus	NA	ABAH RIVER FLYING	FROG	LIV	200	NO	8	VN	VN	T	W	C	C	2000-02-24	2000	2000-02-24	2000	I	MI	FRANKLIN, CAROL	V.C.S. CORPS	NA	Rhacophorus nigropalmatus	Rhacophorus nigropalmatus
2000900520	BMAR	amphibian	Amphibia	Bufo	marinus	NA	NEOTROPICAL	TOAD	LIV	750	NO	750	CL	CL	T	U	C	C	2000-02-24	2000	2000-02-24	2000	I	MI	WEST COAST ZOOLOGICAL, INC.	NA	NA	Bufo marinus	NA
2000257035	HMAD	amphibian	Amphibia	Heterixalus	madagascariensis	NA	MADAGASCAR REED	FROG	LIV	30	NO	67	MG	MG	T	W	C	C	2000-03-09	2000	2000-02-25	2000	I	MI	GLOBAL TROPICAL REPTILES	FAUNA EXPORT	NA	Heterixalus madagascariensis	Heterixalus madagascariensis
2000257035	MAAU	amphibian	Amphibia	Mantella	aurantiaca	NA	MALAGASY GOLDEN	MANTELLA	LIV	695	NO	2578	MG	MG	T	W	C	C	2000-03-09	2000	2000-02-25	2000	I	MI	GLOBAL TROPICAL REPTILES	FAUNA EXPORT	NA	Mantella aurantiaca	Mantella aurantiaca
2000257035	MABE	amphibian	Amphibia	Mantella	bernhardi	NA	GOLDEN	MANTELLA	LIV	68	NO	303	MG	MG	T	W	C	C	2000-03-09	2000	2000-02-25	2000	I	MI	GLOBAL TROPICAL REPTILES	FAUNA EXPORT	NA	Mantella bernhardi	Mantella bernhardi
2000257035	MANB	amphibian	Amphibia	Mantella	betsileo	NA	BETSILEO GOLDEN	MANTELLA	LIV	70	NO	208	MG	MG	T	W	C	C	2000-03-09	2000	2000-02-25	2000	I	MI	GLOBAL TROPICAL REPTILES	FAUNA EXPORT	NA	Mantella betsileo	Mantella betsileo
2000257035	MANE	amphibian	Amphibia	Mantella	expectata	NA	TULAR GOLDEN	MANTELLA	LIV	10	NO	45	MG	MG	T	W	C	C	2000-03-09	2000	2000-02-25	2000	I	MI	GLOBAL TROPICAL REPTILES	FAUNA EXPORT	NA	Mantella expectata	Mantella expectata
2000257035	MANV	amphibian	Amphibia	Mantella	viridis	NA	GREEN GOLDEN	MANTELLA	LIV	71	NO	263	MG	MG	T	W	C	C	2000-03-09	2000	2000-02-25	2000	I	MI	GLOBAL TROPICAL REPTILES	FAUNA EXPORT	NA	Mantella viridis	Mantella viridis
2000257035	MCOW	amphibian	Amphibia	Mantella	cowani	NA	BLACK GOLDEN	MANTELLA	LIV	255	NO	1324	MG	MG	T	W	C	C	2000-03-09	2000	2000-02-25	2000	I	MI	GLOBAL TROPICAL REPTILES	FAUNA EXPORT	NA	Mantella cowani	NA
2000257035	MCRO	amphibian	Amphibia	Mantella	crocea	NA	EASTERN GOLDEN	MANTELLA	LIV	6	NO	18	MG	MG	T	W	C	C	2000-03-09	2000	2000-02-25	2000	I	MI	GLOBAL TROPICAL REPTILES	FAUNA EXPORT	NA	Mantella crocea	Mantella crocea
2000257035	MMAD	amphibian	Amphibia	Mantella	madagascariensis	NA	MADAGASCAR GOLDEN	MANTELLA	LIV	350	NO	1038	MG	MG	T	W	C	C	2000-03-09	2000	2000-02-25	2000	I	MI	GLOBAL TROPICAL REPTILES	FAUNA EXPORT	NA	Mantella madagascariensis	Mantella madagascariensis
2000257035	MNLA	amphibian	Amphibia	Mantella	laevigata	NA	FOLOHY GOLDEN	MANTELLA	LIV	75	NO	390	MG	MG	T	W	C	C	2000-03-09	2000	2000-02-25	2000	I	MI	GLOBAL TROPICAL REPTILES	FAUNA EXPORT	NA	Mantella laevigata	Mantella laevigata
2000257035	MPLC	amphibian	Amphibia	Mantella	pulchra	NA	PARKER'S GOLDEN	MANTELLA	LIV	62	NO	184	MG	MG	T	W	C	C	2000-03-09	2000	2000-02-25	2000	I	MI	GLOBAL TROPICAL REPTILES	FAUNA EXPORT	NA	Mantella pulchra	Mantella pulchra
2000257035	SCGO	amphibian	Amphibia	Scaphiophryne	gottlebei	NA	GOTTLEBE'S MICROHY	FROG	LIV	128	NO	1424	MG	MG	T	W	C	C	2000-03-09	2000	2000-02-25	2000	I	MI	GLOBAL TROPICAL REPTILES	FAUNA EXPORT	NA	Scaphiophryne gottlebei	Scaphiophryne gottlebei
2000257035	SCMR	amphibian	Amphibia	Scaphiophryne	marmorata	NA	MARBLED RAIN	FROG	LIV	6	NO	31	MG	MG	T	W	C	C	2000-03-09	2000	2000-02-25	2000	I	MI	GLOBAL TROPICAL REPTILES	FAUNA EXPORT	NA	Scaphiophryne marmorata	Scaphiophryne marmorata
2000785663	PHBC	amphibian	Amphibia	Phyllomedusa	bicolor	NA	GIANT MONKEY	FROG	LIV	10	NO	250	SR	SR	T	W	C	C	2000-03-02	2000	2000-02-25	2000	I	MI	NA	HENZENS TROPICAL WILDLIFE	NA	Phyllomedusa bicolor	Phyllomedusa bicolor
2000789211	RACA	amphibian	Amphibia	Rana	catesbeiana	NA	NA	BULLFROG	LIV	1300	NO	375	DO	DO	T	C	C	C	2000-08-30	2000	2000-02-25	2000	I	NW	NORTH SEA TRADING CORPORATION	HECTOR ANT TORO	Original value in 'species' column: catesbeinana	Rana catesbeiana	Rana catesbeiana
2000794559	RACA	amphibian	Amphibia	Rana	catesbeiana	NA	NA	BULLFROG	SPE	5014	NO	2640	MX	MX	T	W	C	C	2000-02-25	2000	2000-02-25	2000	I	NG	RANACO CORPORATION	P.A.M.E.E.S.A.	Original value in 'species' column: catesbeinana	Rana catesbeiana	Rana catesbeiana
2000794559	RAFO	amphibian	Amphibia	Rana	forreri	NA	FORRER'S GRASS	FROG	SPE	390	NO	405	MX	MX	T	W	C	C	2000-02-25	2000	2000-02-25	2000	I	NG	RANACO CORPORATION	P.A.M.E.E.S.A.	NA	Rana forreri	Rana forreri
2000730855	ANCT	amphibian	Amphibia	NA	NA	NA	NON-CITES	AMPHIBIANS	LIV	1493	NO	300	HK	HK	T	W	C	C	2000-02-29	2000	2000-02-26	2000	I	NY	BOZMAN IMPORTS LTD.	UNION TROPICAL FISH FARM	NA	Na na	NA
2000734887	ANCT	amphibian	Amphibia	NA	NA	NA	NON-CITES	AMPHIBIANS	LIV	295	NO	681	ID	ID	T	W	C	C	2000-02-26	2000	2000-02-26	2000	I	SF	PAN OCEAN AQUARIUM	PT BEKAEL	NA	Na na	NA
2000739342	HYMC	amphibian	Amphibia	Hymenochirus	curtipes	NA	W. DWARF CLAWED	FROG	LIV	1500	NO	600	SG	SG	T	W	C	C	2000-02-26	2000	2000-02-26	2000	I	LA	AQUA-NAUTIC SPECIALIST	AQUANAUTICS SPECIALIST PTE LIMITED	NA	Hymenochirus curtipes	Hymenochirus curtipes
2000741663	HYMC	amphibian	Amphibia	Hymenochirus	curtipes	NA	W. DWARF CLAWED	FROG	LIV	1200	NO	245	HK	HK	T	W	C	C	2000-02-28	2000	2000-02-26	2000	I	NY	ERDA INC.	BROTHER AQUARIUM	NA	Hymenochirus curtipes	Hymenochirus curtipes
2000739253	HYMC	amphibian	Amphibia	Hymenochirus	curtipes	NA	W. DWARF CLAWED	FROG	LIV	1600	NO	352	HK	HK	T	W	C	C	2000-02-27	2000	2000-02-27	2000	I	LA	AQUACO, INC.	DRAGON FISHERIES	NA	Hymenochirus curtipes	Hymenochirus curtipes
2000739431	KALO	amphibian	Amphibia	Kaloula	pulchra	NA	ASIATIC PAINTED	FROG	LIV	197	NO	79	VN	VN	T	W	C	C	2000-02-27	2000	2000-02-27	2000	I	LA	UNIVERSAL AQUATIC	CORIMEX	NA	Kaloula pulchra	Kaloula pulchra
2000739431	OOLI	amphibian	Amphibia	Occidozyga	lima	NA	PADDY	FROG	LIV	160	NO	32	VN	VN	T	W	C	C	2000-02-27	2000	2000-02-27	2000	I	LA	UNIVERSAL AQUATIC	CORIMEX	Original value in 'genus' column: ooedozyga	Occidozyga lima	Occidozyga lima
2000739431	RLEU	amphibian	Amphibia	Rhacophorus	leucomystax	NA	FLYING	FROG	LIV	300	NO	120	VN	VN	T	W	C	C	2000-02-27	2000	2000-02-27	2000	I	LA	UNIVERSAL AQUATIC	CORIMEX	NA	Rhacophorus leucomystax	NA
2000739492	HYMC	amphibian	Amphibia	Hymenochirus	curtipes	NA	W. DWARF CLAWED	FROG	LIV	1100	NO	440	SG	SG	T	W	C	C	2000-02-27	2000	2000-02-27	2000	I	LA	AQUA-NAUTIC SPECIALIST	AQUANAUTICS SPECIALIST PTE LIMITED	NA	Hymenochirus curtipes	Hymenochirus curtipes
2000740982	LICA	amphibian	Amphibia	Litoria	caerulea	NA	WHITE'S TREE	FROG	LIV	20	NO	16	ID	ID	T	W	C	C	2000-02-27	2000	2000-02-27	2000	I	LA	DOLPHIN INTERNATIONAL	VIVAJAYA INTERNATIONAL	NA	Litoria caerulea	Litoria caerulea
2000740982	OOLI	amphibian	Amphibia	Occidozyga	lima	NA	PADDY	FROG	LIV	300	NO	12	ID	ID	T	W	C	C	2000-02-27	2000	2000-02-27	2000	I	LA	DOLPHIN INTERNATIONAL	VIVAJAYA INTERNATIONAL	Original value in 'genus' column: ooedozyga	Occidozyga lima	Occidozyga lima
2000740993	HYMC	amphibian	Amphibia	Hymenochirus	curtipes	NA	W. DWARF CLAWED	FROG	LIV	300	NO	24	ID	ID	T	W	C	C	2000-02-27	2000	2000-02-27	2000	I	LA	DOLPHIN INTERNATIONAL	P T VIVARIA INDONESIA	NA	Hymenochirus curtipes	Hymenochirus curtipes
2000740993	LICA	amphibian	Amphibia	Litoria	caerulea	NA	WHITE'S TREE	FROG	LIV	130	NO	210	ID	ID	T	W	C	C	2000-02-27	2000	2000-02-27	2000	I	LA	DOLPHIN INTERNATIONAL	P T VIVARIA INDONESIA	NA	Litoria caerulea	Litoria caerulea
2000740993	OOLI	amphibian	Amphibia	Occidozyga	lima	NA	PADDY	FROG	LIV	750	NO	53	ID	ID	T	W	C	C	2000-02-27	2000	2000-02-27	2000	I	LA	DOLPHIN INTERNATIONAL	P T VIVARIA INDONESIA	Original value in 'genus' column: ooedozyga	Occidozyga lima	Occidozyga lima
2000741006	CYOR	amphibian	Amphibia	Cynops	orientalis	NA	CHINESE DWARF	NEWT	LIV	14100	NO	1439	CN	CN	T	W	C	C	2000-02-27	2000	2000-02-27	2000	I	LA	DOLPHIN INTERNATIONAL	SHANGHAI GOLDEN FIELD GARDENING COMPANY LTD	NA	Cynops orientalis	Cynops orientalis
2000734581	KASE	amphibian	Amphibia	Kassina	senegalensis	NA	SENEGAL RUNNING	FROG	LIV	2	NO	2	GH	GH	T	W	C	C	2000-02-28	2000	2000-02-28	2000	I	NY	EAST COAST ZOOLOGICAL SUPPLY	NOMAD COMMERCIAL HOUSE	NA	Kassina senegalensis	Kassina senegalensis
2000735437	RACA	amphibian	Amphibia	Rana	catesbeiana	NA	NA	BULLFROG	LIV	10000	KG	34564	TW	TW	T	C	C	C	2000-02-25	2000	2000-02-28	2000	I	SF	NOR-CAL SEAFOOD INC.	PENSETO SEAFOOD COMPANY LTD	Original value in 'species' column: catesbeinana	Rana catesbeiana	Rana catesbeiana
2000737584	RACA	amphibian	Amphibia	Rana	catesbeiana	NA	NA	BULLFROG	LIV	5000	NO	920	DO	DO	T	C	C	C	2000-02-28	2000	2000-02-28	2000	I	NW	TIN TIN FISH TRADING INC.	EXPORTADORA	Original value in 'species' column: catesbeinana	Rana catesbeiana	Rana catesbeiana
2000737590	RACA	amphibian	Amphibia	Rana	catesbeiana	NA	NA	BULLFROG	LIV	1008	NO	294	DO	DO	T	C	C	C	2000-02-28	2000	2000-02-28	2000	I	NW	NORTH SEA TRADING CORPORATION	NA	Original value in 'species' column: catesbeinana	Rana catesbeiana	Rana catesbeiana
2000742943	PBIF	amphibian	Amphibia	Phrynomantis	bifasciatus	NA	S AFR SNAKE-NECK	FROG	LIV	230	NO	115	TZ	TZ	NA	W	C	C	2000-02-28	2000	2000-02-28	2000	I	LA	L. A. REPTILE	KISASE INVESTMENT	NA	Phrynomantis bifasciatus	Phrynomantis bifasciatus
2000742955	RLEU	amphibian	Amphibia	Rhacophorus	leucomystax	NA	FLYING	FROG	LIV	265	NO	106	VN	VN	NA	W	C	C	2000-02-28	2000	2000-02-28	2000	I	LA	L. A. REPTILE	CORIMEX	NA	Rhacophorus leucomystax	NA
2000747974	HYMC	amphibian	Amphibia	Hymenochirus	curtipes	NA	W. DWARF CLAWED	FROG	LIV	1600	NO	640	SG	SG	T	W	C	C	2000-02-28	2000	2000-02-28	2000	I	LA	AQUA-NAUTIC SPECIALIST	AQUANAUTICS SPECIALIST PTE LTD	NA	Hymenochirus curtipes	Hymenochirus curtipes
2000749618	RANC	amphibian	Amphibia	Rana	clamitans	NA	GREEN	FROG	MEA	5443	KG	33421	TW	TW	T	C	C	C	2000-03-31	2000	2000-02-28	2000	I	LA	FORTUNA SEA PRODUCTS INC.	FOREVER FRB SEAFOOD INC.	NA	Rana clamitans	Rana clamitans
2000738427	MENA	amphibian	Amphibia	Megophrys	nasuta	NA	SPADEFOOT	TOAD	LIV	50	NO	263	ID	ID	T	W	C	C	2000-02-29	2000	2000-02-29	2000	I	DF	TEPEDELEN, KAMURAN	CV TERRARIA INDONESIA	NA	Megophrys nasuta	Pelobatrachus nasuta
2000738427	MENA	amphibian	Amphibia	Megophrys	nasuta	NA	SPADEFOOT	TOAD	LIV	59	NO	309	ID	ID	T	W	C	C	2000-02-29	2000	2000-02-29	2000	I	DF	TEPEDELEN, KAMURAN	CV TERRARIA INDONESIA	NA	Megophrys nasuta	Pelobatrachus nasuta
2000757694	RACA	amphibian	Amphibia	Rana	catesbeiana	NA	NA	BULLFROG	LIV	80	NO	700	TW	CA	T	U	C	C	2000-03-01	2000	2000-02-29	2000	I	BN	MING'S SUPERMARKET INC.	BEAVER FISHERY	Original value in 'species' column: catesbeinana	Rana catesbeiana	Rana catesbeiana
2000794600	RABE	amphibian	Amphibia	Rana	berlandieri	NA	RIO GRANDE	FROG	LIV	400	KG	2552	MX	MX	T	W	C	C	2000-02-29	2000	2000-02-29	2000	I	BV	RANA LABORATORIES	MONTALVO ALVARO GARZA	NA	Rana berlandieri	Rana berlandieri
2000794957	RACA	amphibian	Amphibia	Rana	catesbeiana	NA	NA	BULLFROG	SPE	3735	NO	1650	MX	MX	T	W	C	C	2000-03-03	2000	2000-02-29	2000	I	NG	RANACO CORPORATION	P.A.M.E.E.S.A.	Original value in 'species' column: catesbeinana	Rana catesbeiana	Rana catesbeiana
2000794957	RAFO	amphibian	Amphibia	Rana	forreri	NA	FORRER'S GRASS	FROG	SPE	450	NO	450	MX	MX	T	W	C	C	2000-03-03	2000	2000-02-29	2000	I	NG	RANACO CORPORATION	P.A.M.E.E.S.A.	NA	Rana forreri	Rana forreri
2000800911	LPEN	amphibian	Amphibia	Leptodactylus	pentadactylus	NA	SOUTH AMERICAN	BULLFROG	LIV	29	NO	203	GY	GY	T	U	C	C	2000-02-29	2000	2000-02-29	2000	I	MI	BURGUNDY REPTILE TRADERS	LOUIS MARTINS TROPICAL FAUNA	NA	Leptodactylus pentadactylus	Leptodactylus pentadactylus
2000800919	PHRV	amphibian	Amphibia	Phrynohyas	venulosa	NA	VEINED TREE	FROG	LIV	5	NO	8	PY	PY	T	U	C	C	2000-02-29	2000	2000-02-29	2000	I	MI	BURGUNDY REPTILE TRADERS	NA	NA	Phrynohyas venulosa	NA
2000800919	PHSA	amphibian	Amphibia	Phyllomedusa	sauvagii	NA	PAINT-BELLY MONKEY	FROG	LIV	60	NO	600	PY	PY	T	U	C	C	2000-02-29	2000	2000-02-29	2000	I	MI	BURGUNDY REPTILE TRADERS	NA	NA	Phyllomedusa sauvagii	Phyllomedusa sauvagii
2000747653	ANCT	amphibian	Amphibia	NA	NA	NA	NON-CITES	AMPHIBIANS	LIV	6	NO	1	PY	PY	T	W	C	C	2000-03-01	2000	2000-03-01	2000	I	LA	IZI INTERNATIONAL ZOOLOGICAL IMPORTS	EXOCTIC AQUARIUM & PET SHOP	NA	Na na	NA
2000747653	ANCT	amphibian	Amphibia	NA	NA	NA	NON-CITES	AMPHIBIANS	LIV	1	NO	1	PY	PY	T	W	C	C	2000-03-01	2000	2000-03-01	2000	I	LA	IZI INTERNATIONAL ZOOLOGICAL IMPORTS	EXOCTIC AQUARIUM & PET SHOP	NA	Na na	NA
2000747653	ANCT	amphibian	Amphibia	NA	NA	NA	NON-CITES	AMPHIBIANS	LIV	300	NO	60	PY	PY	T	W	C	C	2000-03-01	2000	2000-03-01	2000	I	LA	IZI INTERNATIONAL ZOOLOGICAL IMPORTS	EXOCTIC AQUARIUM & PET SHOP	NA	Na na	NA
2000747653	ANCT	amphibian	Amphibia	NA	NA	NA	NON-CITES	AMPHIBIANS	LIV	30	NO	5	PY	PY	T	W	C	C	2000-03-01	2000	2000-03-01	2000	I	LA	IZI INTERNATIONAL ZOOLOGICAL IMPORTS	EXOCTIC AQUARIUM & PET SHOP	NA	Na na	NA
2000747653	ANCT	amphibian	Amphibia	NA	NA	NA	NON-CITES	AMPHIBIANS	LIV	3	NO	1	PY	PY	T	W	C	C	2000-03-01	2000	2000-03-01	2000	I	LA	IZI INTERNATIONAL ZOOLOGICAL IMPORTS	EXOCTIC AQUARIUM & PET SHOP	NA	Na na	NA
2000747653	CECW	amphibian	Amphibia	Ceratophrys	cranwelli	NA	CRANWELL'S HORNED	FROG	LIV	80	NO	12	PY	PY	T	W	C	C	2000-03-01	2000	2000-03-01	2000	I	LA	IZI INTERNATIONAL ZOOLOGICAL IMPORTS	EXOCTIC AQUARIUM & PET SHOP	NA	Ceratophrys cranwelli	Ceratophrys cranwelli
2000747653	LLAE	amphibian	Amphibia	Lepidobatrachus	laevis	NA	BUDGETT'S	FROG	LIV	1	NO	1	PY	PY	T	W	C	C	2000-03-01	2000	2000-03-01	2000	I	LA	IZI INTERNATIONAL ZOOLOGICAL IMPORTS	EXOCTIC AQUARIUM & PET SHOP	NA	Lepidobatrachus laevis	Lepidobatrachus laevis
2000900402	CHIX	amphibian	Amphibia	Chiromantis	xerapelina	NA	AFRICAN GRAY TREE	FROG	LIV	200	NO	60	TZ	TZ	T	U	C	C	2000-03-02	2000	2000-03-01	2000	I	MI	BURGUNDY REPTILE TRADERS	G.M. KISHARI BIRDS	NA	Chiromantis xerapelina	NA
2000900497	GMAR	amphibian	Amphibia	Gastrotheca	marsupiata	NA	COMMON MARSUPIAL	FROG	LIV	317	NO	476	PE	PE	T	U	C	C	2000-03-02	2000	2000-03-01	2000	I	MI	GAMA SUPPLIERS, INC.	NA	NA	Gastrotheca marsupiata	Gastrotheca marsupiata
2000737430	RACA	amphibian	Amphibia	Rana	catesbeiana	NA	NA	BULLFROG	LIV	5000	NO	1277	EC	EC	T	C	C	C	2000-03-02	2000	2000-03-02	2000	I	NW	KIN YICK TRADING CORPORATION	ASOCIACION DE PRODUCTORES DE RANAS	Original value in 'species' column: catesbeinana	Rana catesbeiana	Rana catesbeiana
2000742893	RACA	amphibian	Amphibia	Rana	catesbeiana	NA	NA	BULLFROG	LEG	4082	KG	25065	TW	TW	T	W	C	C	2000-03-03	2000	2000-03-02	2000	I	LA	INTERNATIONAL BUSINESS TRADING CORP	FOREVER FROZEN SEAFOODS INC	Original value in 'species' column: catesbeinana	Rana catesbeiana	Rana catesbeiana
2000779244	BUME	amphibian	Amphibia	Bufo	melanostictus	NA	BLACK-SPINED	TOAD	LIV	100	NO	50	VN	XX	T	W	C	C	2000-03-02	2000	2000-03-02	2000	I	MI	JP PETS	VINAFOR HANOI	NA	Bufo melanostictus	Duttaphrynus melanostictus
2000779244	KALO	amphibian	Amphibia	Kaloula	pulchra	NA	ASIATIC PAINTED	FROG	LIV	50	NO	25	VN	XX	T	W	C	C	2000-03-02	2000	2000-03-02	2000	I	MI	JP PETS	VINAFOR HANOI	NA	Kaloula pulchra	Kaloula pulchra
2000779244	RLEU	amphibian	Amphibia	Rhacophorus	leucomystax	NA	FLYING	FROG	LIV	105	NO	52	VN	XX	T	W	C	C	2000-03-02	2000	2000-03-02	2000	I	MI	JP PETS	VINAFOR HANOI	NA	Rhacophorus leucomystax	NA
2000779247	KALO	amphibian	Amphibia	Kaloula	pulchra	NA	ASIATIC PAINTED	FROG	LIV	100	NO	30	VN	VN	T	W	C	C	2000-03-02	2000	2000-03-02	2000	I	MI	SOUTHEAST REPTILE EXCHANGE, INC	CONFICO	NA	Kaloula pulchra	Kaloula pulchra
2000779247	RLEU	amphibian	Amphibia	Rhacophorus	leucomystax	NA	FLYING	FROG	LIV	100	NO	30	VN	VN	T	W	C	C	2000-03-02	2000	2000-03-02	2000	I	MI	SOUTHEAST REPTILE EXCHANGE, INC	CONFICO	NA	Rhacophorus leucomystax	NA
2000779262	KALO	amphibian	Amphibia	Kaloula	pulchra	NA	ASIATIC PAINTED	FROG	LIV	60	NO	18	VN	VN	T	W	C	C	2000-03-02	2000	2000-03-02	2000	I	MI	GLOBAL TROPICAL IMPORT/EXPORT	VCS CORPS	NA	Kaloula pulchra	Kaloula pulchra
2000750908	RACA	amphibian	Amphibia	Rana	catesbeiana	NA	NA	BULLFROG	LIV	2000	NO	700	TW	TW	T	W	C	C	2000-03-15	2000	2000-03-03	2000	I	NY	HOY LUNG SEAFOOD CORPORATION	PENSETO SEAFOOD	Original value in 'species' column: catesbeinana	Rana catesbeiana	Rana catesbeiana
2000751369	RACA	amphibian	Amphibia	Rana	catesbeiana	NA	NA	BULLFROG	LIV	2000	NO	700	TW	TW	T	W	C	C	2000-03-20	2000	2000-03-03	2000	I	NY	HOY LUNG COMPANY	PENSETO SEAFOOD	Original value in 'species' column: catesbeinana	Rana catesbeiana	Rana catesbeiana
2000788739	RACA	amphibian	Amphibia	Rana	catesbeiana	NA	NA	BULLFROG	LIV	1300	NO	361	DO	DO	T	C	C	C	2000-08-28	2000	2000-03-03	2000	I	NW	NORTH SEA TRADING CORPORATION	HECTOR ANT. TORO	Original value in 'species' column: catesbeinana	Rana catesbeiana	Rana catesbeiana
2000732590	HYMC	amphibian	Amphibia	Hymenochirus	curtipes	NA	W. DWARF CLAWED	FROG	LIV	550	NO	117	HK	HK	T	W	C	C	2000-03-06	2000	2000-03-04	2000	I	NY	ERDA INC.	BROTHER AQUARIUM	NA	Hymenochirus curtipes	Hymenochirus curtipes
2000735123	ANCT	amphibian	Amphibia	NA	NA	NA	NON-CITES	AMPHIBIANS	LIV	2750	NO	450	HK	HK	T	W	C	C	2000-03-07	2000	2000-03-04	2000	I	NY	BOZMAN IMPORTS LTD.	UNION TROPICAL FISH FARM	NA	Na na	NA
2000740287	LICA	amphibian	Amphibia	Litoria	caerulea	NA	WHITE'S TREE	FROG	LIV	1571	NO	2356	ID	ID	T	W	C	C	2000-03-04	2000	2000-03-04	2000	I	LA	AQUA-NAUTIC SPECIALIST	PT BEKAEL ESKA GEMILANG	NA	Litoria caerulea	Litoria caerulea
2000740293	HYMC	amphibian	Amphibia	Hymenochirus	curtipes	NA	W. DWARF CLAWED	FROG	LIV	1500	NO	600	SG	SG	T	W	C	C	2000-03-04	2000	2000-03-04	2000	I	LA	AQUA-NAUTIC SPECIALIST	AQUANAUATICS SPECIALIST PTE LTD	NA	Hymenochirus curtipes	Hymenochirus curtipes
2000726884	CYPY	amphibian	Amphibia	Cynops	pyrrhogaster	NA	JAPANESE FIREBELLY	NEWT	LIV	400	NO	110	CN	CN	T	W	C	C	2000-03-09	2000	2000-03-05	2000	I	NY	FISH MART INC.	SHANGHAI INTERNATIONAL TRADER SERVICE	NA	Cynops pyrrhogaster	Cynops pyrrhogaster
2000732597	XELA	amphibian	Amphibia	Xenopus	laevis	NA	AFRICAN CLAWED	TOAD	LIV	140	NO	8	SG	SG	T	W	C	C	2000-03-08	2000	2000-03-05	2000	I	NY	BOZMAN IMPORTS LTD.	AQUAWORLD TROPICAL FISH	NA	Xenopus laevis	Xenopus laevis
2000738682	HYMC	amphibian	Amphibia	Hymenochirus	curtipes	NA	W. DWARF CLAWED	FROG	LIV	2200	NO	507	HK	HK	T	W	C	C	2000-03-05	2000	2000-03-05	2000	I	LA	AQUACO, INC.	DRAGON FISHERIES	NA	Hymenochirus curtipes	Hymenochirus curtipes
2000738696	HYMC	amphibian	Amphibia	Hymenochirus	curtipes	NA	W. DWARF CLAWED	FROG	LIV	100	NO	61	SG	SG	T	W	C	C	2000-03-05	2000	2000-03-05	2000	I	LA	AQUACO, INC.	SUNRISE AQUARIUM PTE LTD	NA	Hymenochirus curtipes	Hymenochirus curtipes
2000739306	HYMC	amphibian	Amphibia	Hymenochirus	curtipes	NA	W. DWARF CLAWED	FROG	LIV	1900	NO	760	SG	SG	T	W	C	C	2000-03-05	2000	2000-03-05	2000	I	LA	AQUA-NAUTIC SPECIALIST	AQUANAUTICS SPECIALIST PTE LTD	NA	Hymenochirus curtipes	Hymenochirus curtipes
2000740505	HYMC	amphibian	Amphibia	Hymenochirus	curtipes	NA	W. DWARF CLAWED	FROG	LIV	1300	NO	520	SG	SG	T	W	C	C	2000-03-05	2000	2000-03-05	2000	I	LA	AQUA-NAUTIC SPECIALIST	AQUANAUTICS SPECIALIST PTE LTD	NA	Hymenochirus curtipes	Hymenochirus curtipes
2000747463	CYOR	amphibian	Amphibia	Cynops	orientalis	NA	CHINESE DWARF	NEWT	LIV	2100	NO	168	HK	HK	T	W	C	C	2000-03-05	2000	2000-03-05	2000	I	LA	DOLPHIN INTERNATIONAL	SANWOO FISHERIES	NA	Cynops orientalis	Cynops orientalis
2000747463	HYMC	amphibian	Amphibia	Hymenochirus	curtipes	NA	W. DWARF CLAWED	FROG	LIV	4200	NO	462	HK	HK	T	W	C	C	2000-03-05	2000	2000-03-05	2000	I	LA	DOLPHIN INTERNATIONAL	SANWOO FISHERIES	NA	Hymenochirus curtipes	Hymenochirus curtipes
2000747468	CYOR	amphibian	Amphibia	Cynops	orientalis	NA	CHINESE DWARF	NEWT	LIV	9900	NO	971	CN	CN	T	W	C	C	2000-03-05	2000	2000-03-05	2000	I	LA	DOLPHIN INTERNATIONAL	SHANGHAI GOLDEN FIELD GARDENING CO LTD	NA	Cynops orientalis	Cynops orientalis
2000747472	OOLI	amphibian	Amphibia	Occidozyga	lima	NA	PADDY	FROG	LIV	1050	NO	42	ID	ID	T	W	C	C	2000-03-05	2000	2000-03-05	2000	I	LA	DOLPHIN INTERNATIONAL	VIVAJAYA INTERNATIONAL	Original value in 'genus' column: ooedozyga	Occidozyga lima	Occidozyga lima
2000747839	HYMC	amphibian	Amphibia	Hymenochirus	curtipes	NA	W. DWARF CLAWED	FROG	LIV	300	NO	24	ID	ID	T	W	C	C	2000-03-05	2000	2000-03-05	2000	I	LA	DOLPHIN INTERNATIONAL	P.T. VIVARIA INDONESIA	NA	Hymenochirus curtipes	Hymenochirus curtipes
2000747839	LICA	amphibian	Amphibia	Litoria	caerulea	NA	WHITE'S TREE	FROG	LIV	230	NO	310	ID	ID	T	W	C	C	2000-03-05	2000	2000-03-05	2000	I	LA	DOLPHIN INTERNATIONAL	P.T. VIVARIA INDONESIA	NA	Litoria caerulea	Litoria caerulea
2000747839	OOLI	amphibian	Amphibia	Occidozyga	lima	NA	PADDY	FROG	LIV	1050	NO	74	ID	ID	T	W	C	C	2000-03-05	2000	2000-03-05	2000	I	LA	DOLPHIN INTERNATIONAL	P.T. VIVARIA INDONESIA	Original value in 'genus' column: ooedozyga	Occidozyga lima	Occidozyga lima
2000747881	CYOR	amphibian	Amphibia	Cynops	orientalis	NA	CHINESE DWARF	NEWT	LIV	75	NO	26	HK	HK	T	W	C	C	2000-03-05	2000	2000-03-05	2000	I	LA	DOLPHIN INTERNATIONAL	UNION TROPICAL FISH FARM LTD	NA	Cynops orientalis	Cynops orientalis
2000788973	RACA	amphibian	Amphibia	Rana	catesbeiana	NA	NA	BULLFROG	LIV	5000	NO	600	DO	DO	T	C	C	C	2000-08-29	2000	2000-03-05	2000	I	NW	TIN TIN FISH TRADING INC.	EXPORTADORA GONZALES S.A.	Original value in 'species' column: catesbeinana	Rana catesbeiana	Rana catesbeiana
2000791693	RACA	amphibian	Amphibia	Rana	catesbeiana	NA	NA	BULLFROG	LIV	3000	NO	945	TW	TW	T	W	C	C	2000-03-06	2000	2000-03-05	2000	I	NY	HOY LUNG SEAFOOD CORPORATION	HORREI FISHERY CO	Original value in 'species' column: catesbeinana	Rana catesbeiana	Rana catesbeiana
2000785962	AGCL	amphibian	Amphibia	Agalychnis	callidryas	NA	RED-EYED TREE	FROG	LIV	100	NO	175	NI	NI	T	C	C	C	2000-03-07	2000	2000-03-06	2000	I	MI	AUDETTE, DAVID WARREN	EXPANSA	NA	Agalychnis callidryas	Agalychnis callidryas
2000788743	RACA	amphibian	Amphibia	Rana	catesbeiana	NA	NA	BULLFROG	LIV	1400	NO	3196	DO	DO	T	C	C	C	2000-08-29	2000	2000-03-06	2000	I	NW	NORTH SEA TRADING CORPORATION	HECTOR ANT. TORO	Original value in 'species' column: catesbeinana	Rana catesbeiana	Rana catesbeiana
2000739541	KALO	amphibian	Amphibia	Kaloula	pulchra	NA	ASIATIC PAINTED	FROG	LIV	50	NO	65	ID	ID	T	W	C	C	2000-03-07	2000	2000-03-07	2000	I	LA	CALIFORNIA ZOOLOGICAL SUPPLY	FIRMA HASCO	NA	Kaloula pulchra	Kaloula pulchra
2000740453	CYOR	amphibian	Amphibia	Cynops	orientalis	NA	CHINESE DWARF	NEWT	LIV	9000	NO	360	CN	CN	T	W	C	C	2000-03-07	2000	2000-03-07	2000	I	LA	AQUA-NAUTIC SPECIALIST	SHANGHAI ESWELL ENTERPRISE CO LTD	NA	Cynops orientalis	Cynops orientalis
2000746287	RATE	amphibian	Amphibia	Rana	temporaria	NA	EUROPEAN COMMON	FROG	LIV	300	NO	484	IE	IE	T	U	C	C	2000-03-07	2000	2000-03-07	2000	I	AT	CHARLES D. SULLIVAN CO., INC.	THE FROG FARM	NA	Rana temporaria	Rana temporaria
2000785982	RACA	amphibian	Amphibia	Rana	catesbeiana	NA	NA	BULLFROG	LIV	3205	NO	5454	GT	GT	T	U	C	C	2000-03-07	2000	2000-03-07	2000	I	MI	AQUALAND, INC.	PRODUCTOS ACUICOLAS DE GUATEMALA	Original value in 'species' column: catesbeinana	Rana catesbeiana	Rana catesbeiana
2000794611	RABE	amphibian	Amphibia	Rana	berlandieri	NA	RIO GRANDE	FROG	LIV	300	KG	1914	MX	MX	T	W	C	C	2000-03-07	2000	2000-03-07	2000	I	BV	RANA LABORATORIES	MONTALVO ALVARO GARZA	NA	Rana berlandieri	Rana berlandieri
2000802695	PHRV	amphibian	Amphibia	Phrynohyas	venulosa	NA	VEINED TREE	FROG	LIV	100	NO	350	HN	HN	T	U	C	C	2000-03-07	2000	2000-03-07	2000	I	MI	MIAMI REPTILE	BREEDING FARMS CORP.	NA	Phrynohyas venulosa	NA
2000802695	SMBA	amphibian	Amphibia	Smilisca	baudinii	NA	COMMON MEX. TREE	FROG	LIV	38	NO	114	HN	HN	T	U	C	C	2000-03-07	2000	2000-03-07	2000	I	MI	MIAMI REPTILE	BREEDING FARMS CORP.	NA	Smilisca baudinii	Smilisca baudinii
2000726971	CYOR	amphibian	Amphibia	Cynops	orientalis	NA	CHINESE DWARF	NEWT	LIV	600	NO	30	CN	CN	T	W	C	C	2000-03-10	2000	2000-03-08	2000	I	NY	MIN HUA ENTERPRISE, INC.	SHANGHAI ESWELL ENTERPRISE CO	NA	Cynops orientalis	Cynops orientalis
2000736665	RACA	amphibian	Amphibia	Rana	catesbeiana	NA	NA	BULLFROG	LIV	1450	KG	580	DO	DO	T	W	C	C	2000-03-15	2000	2000-03-08	2000	I	NW	TIN TIN FISH TRADING INC.	EXPORTADORA GONZALEAS	Original value in 'species' column: catesbeinana	Rana catesbeiana	Rana catesbeiana
2000752208	ANCT	amphibian	Amphibia	NA	NA	NA	NON-CITES	AMPHIBIANS	SPE	1	NO	0	BO	DE	non-standard value	W	C	C	2000-03-09	2000	2000-03-08	2000	I	DF	BIOLOGY UTA	STAATLICHES MUSEUM FUR NATURKUNDE	Original value in 'purpose' column: N	Na na	NA
2000783784	ANCT	amphibian	Amphibia	NA	NA	NA	NON-CITES	AMPHIBIANS	LIV	3	NO	1	PY	PY	T	W	C	C	2000-03-08	2000	2000-03-08	2000	I	MI	GAMA SUPPLIERS, INC.	NA	NA	Na na	NA
2000783784	PHSA	amphibian	Amphibia	Phyllomedusa	sauvagii	NA	PAINT-BELLY MONKEY	FROG	LIV	42	NO	63	PY	PY	T	W	C	C	2000-03-08	2000	2000-03-08	2000	I	MI	GAMA SUPPLIERS, INC.	NA	NA	Phyllomedusa sauvagii	Phyllomedusa sauvagii
2000789238	RACA	amphibian	Amphibia	Rana	catesbeiana	NA	NA	BULLFROG	LIV	2000	NO	700	TW	TW	T	C	C	C	2000-08-29	2000	2000-03-08	2000	I	NW	HOY LUNG SEAFOOD CORPORATION	HORREI FISHERY COMPANY	Original value in 'species' column: catesbeinana	Rana catesbeiana	Rana catesbeiana
2000794950	BMAR	amphibian	Amphibia	Bufo	marinus	NA	NEOTROPICAL	TOAD	SPE	3	NO	2	MX	MX	T	W	C	C	2000-03-10	2000	2000-03-08	2000	I	NG	RANACO CORPORATION	P.A.M.E.E.S.A.	NA	Bufo marinus	NA
2000794950	RACA	amphibian	Amphibia	Rana	catesbeiana	NA	NA	BULLFROG	SPE	4976	NO	2970	MX	MX	T	W	C	C	2000-03-10	2000	2000-03-08	2000	I	NG	RANACO CORPORATION	P.A.M.E.E.S.A.	Original value in 'species' column: catesbeinana	Rana catesbeiana	Rana catesbeiana
2000794950	RAFO	amphibian	Amphibia	Rana	forreri	NA	FORRER'S GRASS	FROG	SPE	170	NO	180	MX	MX	T	W	C	C	2000-03-10	2000	2000-03-08	2000	I	NG	RANACO CORPORATION	P.A.M.E.E.S.A.	NA	Rana forreri	Rana forreri
2000737585	BMAR	amphibian	Amphibia	Bufo	marinus	NA	NEOTROPICAL	TOAD	LIV	25	NO	196	AU	AU	non-standard value	W	C	C	2000-03-09	2000	2000-03-09	2000	I	SF	STANFORD UNIVERSITY	NA	Original value in 'purpose' column: N	Bufo marinus	NA
2000743308	RMAC	amphibian	Amphibia	Rana	macrodon	NA	NA	BULLFROG	LEG	252	NO	10135	ID	ID	T	W	C	C	2000-03-29	2000	2000-03-09	2000	I	BO	CHANNEL SEAFOODS INTERNATIONAL	PT SUMBER PANGAN NUSANTARA	NA	Rana macrodon	NA
2000745624	RACA	amphibian	Amphibia	Rana	catesbeiana	NA	NA	BULLFROG	LIV	5000	NO	982	EC	EC	T	C	C	C	2000-03-15	2000	2000-03-09	2000	I	NW	KIN YICK TRADING CORPORATION	VIVACOSE Y CIA	Original value in 'species' column: catesbeinana	Rana catesbeiana	Rana catesbeiana
2000752207	ANCT	amphibian	Amphibia	NA	NA	NA	NON-CITES	AMPHIBIANS	SPE	14	NO	0	BO	BO	non-standard value	W	C	C	2000-03-09	2000	2000-03-09	2000	I	DF	BIOLOGY UTA	MUSEO DE HISTORIA NATURAL NOEL KEMPFF MERCADO UAGR	Original value in 'purpose' column: N	Na na	NA
2000802693	DETI	amphibian	Amphibia	Dendrobates	tinctorius	NA	DYEING	POISON-ARROW FROG	LIV	24	NO	600	SR	CA	T	W	C	C	2000-03-09	2000	2000-03-09	2000	I	MI	MOMMSEN, BRIAN ROGER	MIRDO IMPORTATIONS	NA	Dendrobates tinctorius	Dendrobates tinctorius
2000802693	LPEN	amphibian	Amphibia	Leptodactylus	pentadactylus	NA	SOUTH AMERICAN	BULLFROG	LIV	20	NO	200	SR	CA	T	U	C	C	2000-03-09	2000	2000-03-09	2000	I	MI	MOMMSEN, BRIAN ROGER	MIRDO IMPORTATIONS	NA	Leptodactylus pentadactylus	Leptodactylus pentadactylus
2000789411	RACA	amphibian	Amphibia	Rana	catesbeiana	NA	NA	BULLFROG	LIV	1000	NO	266	DO	DO	T	C	C	C	2000-08-29	2000	2000-03-10	2000	I	NW	NORTH SEA TRADING CORPORATION	HECTOR ANT TORO	Original value in 'species' column: catesbeinana	Rana catesbeiana	Rana catesbeiana
2000748435	CEGU	amphibian	Amphibia	Ceratobatrachus	guentheri	NA	GUNTHER'S TRIANGLE	FROG	LIV	120	NO	240	SB	SB	T	W	C	C	2000-03-11	2000	2000-03-11	2000	I	LA	L.A. REPTILE INC.	JINNEY ROBERT ETE	NA	Ceratobatrachus guentheri	NA
2000750917	XELA	amphibian	Amphibia	Xenopus	laevis	NA	AFRICAN CLAWED	TOAD	LIV	500	NO	75	HK	HK	T	W	C	C	2000-03-14	2000	2000-03-11	2000	I	NY	BOZMAN IMPORTS LTD.	UNION TROPICAL FISH FARM	NA	Xenopus laevis	Xenopus laevis
2000738920	HYMC	amphibian	Amphibia	Hymenochirus	curtipes	NA	W. DWARF CLAWED	FROG	LIV	2400	NO	551	HK	HK	T	W	C	C	2000-03-12	2000	2000-03-12	2000	I	LA	AQUACO, INC.	DRAGON FISHERIES	NA	Hymenochirus curtipes	Hymenochirus curtipes
2000739046	CYOR	amphibian	Amphibia	Cynops	orientalis	NA	CHINESE DWARF	NEWT	LIV	75	NO	26	HK	HK	T	W	C	C	2000-03-12	2000	2000-03-12	2000	I	LA	DOLPHIN INTERNATIONAL	UNION TROPICAL FISH FARM LIMITED	NA	Cynops orientalis	Cynops orientalis
2000739071	LICA	amphibian	Amphibia	Litoria	caerulea	NA	WHITE'S TREE	FROG	LIV	230	NO	350	ID	ID	T	W	C	C	2000-03-12	2000	2000-03-12	2000	I	LA	DOLPHIN INTERNATIONAL	VIVARIA INDONESIA P.T.	NA	Litoria caerulea	Litoria caerulea
2000739126	HYMC	amphibian	Amphibia	Hymenochirus	curtipes	NA	W. DWARF CLAWED	FROG	LIV	250	NO	50	HK	HK	T	W	C	C	2000-03-12	2000	2000-03-12	2000	I	LA	SALINAS, ADRIAN	CEYLON AQUARIUM	NA	Hymenochirus curtipes	Hymenochirus curtipes
2000740516	HYMC	amphibian	Amphibia	Hymenochirus	curtipes	NA	W. DWARF CLAWED	FROG	LIV	100	NO	38	SG	SG	T	W	C	C	2000-03-12	2000	2000-03-12	2000	I	LA	AQUACO, INC.	SUNRISE AQUARIUM PTE	NA	Hymenochirus curtipes	Hymenochirus curtipes
2000742287	OOLI	amphibian	Amphibia	Occidozyga	lima	NA	PADDY	FROG	LIV	150	NO	14	ID	ID	T	W	C	C	2000-03-15	2000	2000-03-12	2000	I	NY	BOZMAN IMPORTS LTD.	VIAJAYA INTERNATIONAL	Original value in 'genus' column: ooedozyga	Occidozyga lima	Occidozyga lima
2000747835	KALO	amphibian	Amphibia	Kaloula	pulchra	NA	ASIATIC PAINTED	FROG	LIV	325	NO	130	VN	VN	T	W	C	C	2000-03-12	2000	2000-03-12	2000	I	LA	UNIVERSAL AQUATIC	CORIMEX	NA	Kaloula pulchra	Kaloula pulchra
2000747835	RLEU	amphibian	Amphibia	Rhacophorus	leucomystax	NA	FLYING	FROG	LIV	375	NO	150	VN	VN	T	W	C	C	2000-03-12	2000	2000-03-12	2000	I	LA	UNIVERSAL AQUATIC	CORIMEX	NA	Rhacophorus leucomystax	NA
2000738467	RACA	amphibian	Amphibia	Rana	catesbeiana	NA	NA	BULLFROG	LIV	10000	KG	34564	TW	TW	T	W	C	C	2000-03-10	2000	2000-03-13	2000	I	SF	NOR-CAL SEAFOOD INC.	PENSETO SEAFOOD COMPANY LTD	Original value in 'species' column: catesbeinana	Rana catesbeiana	Rana catesbeiana
2000738751	DEFA	amphibian	Amphibia	Dendrobates	fantasticus	NA	RED-HEADED	POISON-ARROW FROG	LIV	25	NO	300	NL	NL	T	C	C	C	2000-03-13	2000	2000-03-13	2000	I	DU	GAGLIARDO, RONALD W.	RIJK LOOYS	NA	Dendrobates fantasticus	Ranitomeya fantastica
2000738751	DEGA	amphibian	Amphibia	Dendrobates	galactonotus	NA	SPLASH-BACKED	POISON-ARROW FROG	LIV	35	NO	800	NL	NL	T	C	C	C	2000-03-13	2000	2000-03-13	2000	I	DU	GAGLIARDO, RONALD W.	RIJK LOOYS	NA	Dendrobates galactonotus	Adelphobates galactonotus
2000738751	DEIM	amphibian	Amphibia	Dendrobates	imitator	NA	MIMIC	POISON-ARROW FROG	LIV	5	NO	75	NL	NL	T	C	C	C	2000-03-13	2000	2000-03-13	2000	I	DU	GAGLIARDO, RONALD W.	RIJK LOOYS	NA	Dendrobates imitator	Ranitomeya imitator
2000738751	DEQU	amphibian	Amphibia	Dendrobates	quinquevittatus	NA	RIO MADEIRA	POISON-ARROW FROG	LIV	30	NO	450	NL	NL	T	C	C	C	2000-03-13	2000	2000-03-13	2000	I	DU	GAGLIARDO, RONALD W.	RIJK LOOYS	NA	Dendrobates quinquevittatus	NA
2000738751	DETI	amphibian	Amphibia	Dendrobates	tinctorius	NA	DYEING	POISON-ARROW FROG	LIV	25	NO	250	NL	NL	T	C	C	C	2000-03-13	2000	2000-03-13	2000	I	DU	GAGLIARDO, RONALD W.	RIJK LOOYS	NA	Dendrobates tinctorius	Dendrobates tinctorius
2000738751	DEZA	amphibian	Amphibia	Epipedobates	zaparo	NA	SANGUINE	POISON-ARROW FROG	LIV	50	NO	750	NL	NL	T	C	C	C	2000-03-13	2000	2000-03-13	2000	I	DU	GAGLIARDO, RONALD W.	RIJK LOOYS	NA	Epipedobates zaparo	NA
2000738751	DLAM	amphibian	Amphibia	Dendrobates	lamasi	NA	PASCO	POISON-ARROW FROG	LIV	12	NO	120	NL	NL	T	C	C	C	2000-03-13	2000	2000-03-13	2000	I	DU	GAGLIARDO, RONALD W.	RIJK LOOYS	NA	Dendrobates lamasi	NA
2000738751	PART	amphibian	Amphibia	Phyllobates	aurotaenia	NA	KOKOE	POISON-DART FROG	LIV	15	NO	225	NL	NL	T	C	C	C	2000-03-13	2000	2000-03-13	2000	I	DU	GAGLIARDO, RONALD W.	RIJK LOOYS	NA	Phyllobates aurotaenia	Phyllobates aurotaenia
2000738751	PHTE	amphibian	Amphibia	Phyllobates	terribilis	NA	GOLDEN	POISON-DART FROG	LIV	15	NO	300	NL	NL	T	C	C	C	2000-03-13	2000	2000-03-13	2000	I	DU	GAGLIARDO, RONALD W.	RIJK LOOYS	NA	Phyllobates terribilis	Phyllobates terribilis
2000738935	LIAU	amphibian	Amphibia	Litoria	aurea	NA	GREEN & GOLD BELL	FROG	LIV	600	NO	648	NZ	NZ	T	W	C	C	2000-03-13	2000	2000-03-13	2000	I	LA	CALIFORNIA ZOOLOGICAL SUPPLY	BURBANK GOLDFISH AND TREE	NA	Litoria aurea	Litoria aurea
2000742276	BMAR	amphibian	Amphibia	Bufo	marinus	NA	NEOTROPICAL	TOAD	LIV	182	NO	1000	DO	DO	non-standard value	W	C	C	2000-03-14	2000	2000-03-13	2000	I	BO	NA	NA	Original value in 'purpose' column: N	Bufo marinus	NA
2000744738	DEAZ	amphibian	Amphibia	Dendrobates	azureus	NA	BLUE	POISON-ARROW FROG	LIV	2	NO	23	DE	DE	non-standard value	C	C	C	2000-03-13	2000	2000-03-13	2000	I	CH	ROD MITCHELL	TSN	Original value in 'purpose' column: N	Dendrobates azureus	NA
2000744738	DEGA	amphibian	Amphibia	Dendrobates	galactonotus	NA	SPLASH-BACKED	POISON-ARROW FROG	LIV	45	NO	518	DE	DE	non-standard value	C	C	C	2000-03-13	2000	2000-03-13	2000	I	CH	ROD MITCHELL	TSN	Original value in 'purpose' column: N	Dendrobates galactonotus	Adelphobates galactonotus
2000744738	DETI	amphibian	Amphibia	Dendrobates	tinctorius	NA	DYEING	POISON-ARROW FROG	LIV	1	NO	12	DE	DE	non-standard value	C	C	C	2000-03-13	2000	2000-03-13	2000	I	CH	ROD MITCHELL	TSN	Original value in 'purpose' column: N	Dendrobates tinctorius	Dendrobates tinctorius
2000744738	DLEU	amphibian	Amphibia	Dendrobates	leucomelas	NA	YELLOW-BANDED	POISON-ARROW FROG	LIV	15	NO	173	DE	DE	non-standard value	C	C	C	2000-03-13	2000	2000-03-13	2000	I	CH	ROD MITCHELL	TSN	Original value in 'purpose' column: N	Dendrobates leucomelas	Dendrobates leucomelas
2000744738	PHTE	amphibian	Amphibia	Phyllobates	terribilis	NA	GOLDEN	POISON-DART FROG	LIV	7	NO	81	DE	DE	non-standard value	C	C	C	2000-03-13	2000	2000-03-13	2000	I	CH	ROD MITCHELL	TSN	Original value in 'purpose' column: N	Phyllobates terribilis	Phyllobates terribilis
2000745655	RACA	amphibian	Amphibia	Rana	catesbeiana	NA	NA	BULLFROG	LIV	500	NO	360	DO	DO	T	C	C	C	2000-03-28	2000	2000-03-13	2000	I	NW	TIN TIN FISH TRADING INC.	EXPORTADORA GONZALEAS S.A.	Original value in 'species' column: catesbeinana	Rana catesbeiana	Rana catesbeiana
2000745661	RACA	amphibian	Amphibia	Rana	catesbeiana	NA	NA	BULLFROG	LIV	1300	NO	371	DO	DO	T	C	C	C	2000-03-28	2000	2000-03-13	2000	I	NW	NORTH SEA TRADING CORPORATION	NA	Original value in 'species' column: catesbeinana	Rana catesbeiana	Rana catesbeiana
2000783884	LICA	amphibian	Amphibia	Litoria	caerulea	NA	WHITE'S TREE	FROG	LIV	400	NO	1000	ID	ID	T	W	C	C	2000-03-13	2000	2000-03-13	2000	I	MI	SOUTH FLORIDA REPTILE EXCHANGE	C.V. PRESTASI	NA	Litoria caerulea	Litoria caerulea
2000783884	RHRE	amphibian	Amphibia	Rhacophorus	reinwardtii	NA	REINWARDT'S FLYING	FROG	LIV	50	NO	150	ID	ID	T	W	C	C	2000-03-13	2000	2000-03-13	2000	I	MI	SOUTH FLORIDA REPTILE EXCHANGE	C.V. PRESTASI	NA	Rhacophorus reinwardtii	Rhacophorus reinwardtii
2000786165	BMAR	amphibian	Amphibia	Bufo	marinus	NA	NEOTROPICAL	TOAD	UNS	350	NO	300	NI	NI	T	W	C	C	2000-03-13	2000	2000-03-13	2000	I	MI	NA	NA	NA	Bufo marinus	NA
2000786165	BMAR	amphibian	Amphibia	Bufo	marinus	NA	NEOTROPICAL	TOAD	UNS	450	NO	450	NI	NI	T	W	C	C	2000-03-13	2000	2000-03-13	2000	I	MI	NA	NA	NA	Bufo marinus	NA
2000794609	RABE	amphibian	Amphibia	Rana	berlandieri	NA	RIO GRANDE	FROG	LIV	450	KG	2871	MX	MX	T	W	C	C	2000-03-13	2000	2000-03-13	2000	I	BV	RANA LABORATORIES	MONTALVO ALVARO GARZA	NA	Rana berlandieri	Rana berlandieri
2000736660	XELA	amphibian	Amphibia	Xenopus	laevis	NA	AFRICAN CLAWED	TOAD	LIV	505	NO	131	CZ	CZ	T	W	C	C	2000-03-15	2000	2000-03-14	2000	I	NW	GLOBAL TROPICAL RESOURCES INC.	APISTOGRAMMA AQUARIUM	NA	Xenopus laevis	Xenopus laevis
2000745812	RACA	amphibian	Amphibia	Rana	catesbeiana	NA	NA	BULLFROG	LIV	5000	NO	1041	EC	EC	T	C	C	C	2000-03-28	2000	2000-03-14	2000	I	NW	KIN YICK TRADING CORPORATION	ASOCIACION PRODUCTORA DE RANAS	Original value in 'species' column: catesbeinana	Rana catesbeiana	Rana catesbeiana
2000747521	LICA	amphibian	Amphibia	Litoria	caerulea	NA	WHITE'S TREE	FROG	LIV	100	NO	150	ID	ID	T	W	C	C	2000-03-14	2000	2000-03-14	2000	I	LA	L. A. REPTILE	FIRMA HASCO	NA	Litoria caerulea	Litoria caerulea
2000748660	ANCT	amphibian	Amphibia	NA	NA	NA	NON-CITES	AMPHIBIANS	SKI	15	NO	172	HK	HK	T	C	C	C	2000-03-15	2000	2000-03-14	2000	I	LA	MICHAEL'S FURS	RISING SUN FUR MANUFACTURING LTD	NA	Na na	NA
2000770852	ANCT	amphibian	Amphibia	NA	NA	NA	NON-CITES	AMPHIBIANS	MEA	6	KG	238	XX	HK	T	W	R	S	2000-03-17	2000	2000-03-14	2000	I	AN	YUE FUNG USA ENTERPRISE INC.	NA	NA	Na na	NA
2000742291	CYOR	amphibian	Amphibia	Cynops	orientalis	NA	CHINESE DWARF	NEWT	LIV	800	NO	40	CN	CN	T	W	C	C	2000-03-22	2000	2000-03-15	2000	I	NY	MIN HUA ENTERPRISE, INC.	SHANGHAI ESWELL ENTERPRISE	NA	Cynops orientalis	Cynops orientalis
2000742696	ANCT	amphibian	Amphibia	NA	NA	NA	NON-CITES	AMPHIBIANS	LIV	664	NO	300	NG	NG	NA	W	C	C	2000-03-17	2000	2000-03-15	2000	I	NY	OKUOLU INTERNATIONAL USA INC.	OLUOLU INTERNATIONAL	NA	Na na	NA
2000783288	RNIG	amphibian	Amphibia	Rhacophorus	nigropalmatus	NA	ABAH RIVER FLYING	FROG	LIV	300	NO	150	VN	VN	T	W	C	C	2000-03-15	2000	2000-03-15	2000	I	MI	MIAMI REPTILE	V.C.S CORPS	NA	Rhacophorus nigropalmatus	Rhacophorus nigropalmatus
2000785066	CHIX	amphibian	Amphibia	Chiromantis	xerapelina	NA	AFRICAN GRAY TREE	FROG	LIV	28	NO	30	TZ	TZ	T	W	C	C	2000-03-15	2000	2000-03-15	2000	I	MI	STUBBS, RICHARD A	G.M. KISHARI BIRDS	NA	Chiromantis xerapelina	NA
2000785066	HEMM	amphibian	Amphibia	Hemisus	marmoratus	NA	MARBLED SHOVELNOSE	FROG	LIV	200	NO	60	TZ	TZ	T	U	C	C	2000-03-15	2000	2000-03-15	2000	I	MI	STUBBS, RICHARD A	G.M. KISHARI BIRDS	NA	Hemisus marmoratus	Hemisus marmoratus
2000785066	PBIF	amphibian	Amphibia	Phrynomantis	bifasciatus	NA	S AFR SNAKE-NECK	FROG	LIV	100	NO	30	TZ	TZ	T	W	C	C	2000-03-15	2000	2000-03-15	2000	I	MI	STUBBS, RICHARD A	G.M. KISHARI BIRDS	NA	Phrynomantis bifasciatus	Phrynomantis bifasciatus
2000741106	RACA	amphibian	Amphibia	Rana	catesbeiana	NA	NA	BULLFROG	LIV	3000	NO	1029	TW	TW	T	W	C	C	2000-03-21	2000	2000-03-16	2000	I	NY	KIN YICK TRADING CORPORATION	ESTATE GALLIN INTERNATIONAL TRADE	Original value in 'species' column: catesbeinana	Rana catesbeiana	Rana catesbeiana
2000745658	RACA	amphibian	Amphibia	Rana	catesbeiana	NA	NA	BULLFROG	LIV	844	KG	335	DO	DO	T	C	C	C	2000-03-28	2000	2000-03-16	2000	I	NW	TIN TIN FISH TRADING INC.	EXPORTADORA GONZALEAS S.A.	Original value in 'species' column: catesbeinana	Rana catesbeiana	Rana catesbeiana
2000766004	RMAC	amphibian	Amphibia	Rana	macrodon	NA	NA	BULLFROG	GAR	6	NO	140	ID	IT	T	W	C	C	2000-03-20	2000	2000-03-16	2000	I	NY	PRADA USA CORP.	I PELLETTIERI D'ITALIA SPA	NA	Rana macrodon	NA
2000783290	NA	amphibian	Amphibia	Phrynohyas	resinifictrix	NA	NA	NA	LIV	300	NO	6736	DE	DE	T	W	C	C	2000-03-16	2000	2000-03-16	2000	I	MI	WEST COAST ZOOLOGICAL, INC.	IMPORT-EXPORT PETER HOCH	Original value in 'species' column: resini fectrix	Phrynohyas resinifictrix	Trachycephalus resinifictrix
2000737048	RACA	amphibian	Amphibia	Rana	catesbeiana	NA	NA	BULLFROG	LIV	800	NO	224	DO	DO	T	C	C	C	2000-03-20	2000	2000-03-17	2000	I	NW	NORTH SEA TRADING CORPORATION	HECTOR ANT TORO	Original value in 'species' column: catesbeinana	Rana catesbeiana	Rana catesbeiana
2000751900	LICA	amphibian	Amphibia	Litoria	caerulea	NA	WHITE'S TREE	FROG	LIV	250	NO	650	ID	ID	T	W	C	C	2000-03-17	2000	2000-03-17	2000	I	DF	TEPEDELEN, KAMURAN/TEPEDELEN ENTERPRISES INC	CV TERRARIA INDONESIA	NA	Litoria caerulea	Litoria caerulea
2000751900	MENA	amphibian	Amphibia	Megophrys	nasuta	NA	SPADEFOOT	TOAD	LIV	50	NO	260	ID	ID	T	W	C	C	2000-03-17	2000	2000-03-17	2000	I	DF	TEPEDELEN, KAMURAN/TEPEDELEN ENTERPRISES INC	CV TERRARIA INDONESIA	NA	Megophrys nasuta	Pelobatrachus nasuta
2000783291	PHYV	amphibian	Amphibia	Phyllobates	vittatus	NA	ORANGE AND BLACK	POISON-DART FROG	LIV	199	NO	3781	CZ	CZ	T	C	C	C	2000-03-17	2000	2000-03-17	2000	I	MI	GAMA SUPPLIERS, INC.	B.A.R ZOO	NA	Phyllobates vittatus	Phyllobates vittatus
2000785710	CECW	amphibian	Amphibia	Ceratophrys	cranwelli	NA	CRANWELL'S HORNED	FROG	LIV	5	NO	50	PY	PY	T	U	C	C	2000-03-17	2000	2000-03-17	2000	I	MI	BURGUNDY REPTILE TRADERS	NA	NA	Ceratophrys cranwelli	Ceratophrys cranwelli
2000785710	LLAE	amphibian	Amphibia	Lepidobatrachus	laevis	NA	BUDGETT'S	FROG	LIV	12	NO	120	PY	PY	T	U	C	C	2000-03-17	2000	2000-03-17	2000	I	MI	BURGUNDY REPTILE TRADERS	NA	NA	Lepidobatrachus laevis	Lepidobatrachus laevis
2000785710	PHRV	amphibian	Amphibia	Phrynohyas	venulosa	NA	VEINED TREE	FROG	LIV	120	NO	248	PY	PY	T	U	C	C	2000-03-17	2000	2000-03-17	2000	I	MI	BURGUNDY REPTILE TRADERS	NA	NA	Phrynohyas venulosa	NA
2000785710	PHSA	amphibian	Amphibia	Phyllomedusa	sauvagii	NA	PAINT-BELLY MONKEY	FROG	LIV	115	NO	1150	PY	PY	T	U	C	C	2000-03-17	2000	2000-03-17	2000	I	MI	BURGUNDY REPTILE TRADERS	NA	NA	Phyllomedusa sauvagii	Phyllomedusa sauvagii
2000785738	AGCL	amphibian	Amphibia	Agalychnis	callidryas	NA	RED-EYED TREE	FROG	LIV	29	NO	203	NI	NI	T	C	C	C	2000-03-17	2000	2000-03-17	2000	I	MI	EMERALD CORAL & REPTILE	ZOONICA S.A.	NA	Agalychnis callidryas	Agalychnis callidryas
2000872800	ANCT	amphibian	Amphibia	NA	NA	NA	NON-CITES	AMPHIBIANS	LIV	60	NO	24	HK	HK	T	U	C	C	2001-03-19	2001	2000-03-17	2000	I	NY	TRANSSHIP DISCOUNTS LTD.	UNION TROPICAL FISH FARM LTD.	NA	Na na	NA
2000872800	ANCT	amphibian	Amphibia	NA	NA	NA	NON-CITES	AMPHIBIANS	LIV	750	NO	120	HK	HK	T	U	C	C	2001-03-19	2001	2000-03-17	2000	I	NY	TRANSSHIP DISCOUNTS LTD.	UNION TROPICAL FISH FARM LTD.	NA	Na na	NA
2000872800	ANCT	amphibian	Amphibia	NA	NA	NA	NON-CITES	AMPHIBIANS	LIV	125	NO	123	HK	HK	T	U	C	C	2001-03-19	2001	2000-03-17	2000	I	NY	TRANSSHIP DISCOUNTS LTD.	UNION TROPICAL FISH FARM LTD.	NA	Na na	NA
2000726514	CYPY	amphibian	Amphibia	Cynops	pyrrhogaster	NA	JAPANESE FIREBELLY	NEWT	LIV	125	NO	53	HK	HK	T	W	C	C	2000-03-22	2000	2000-03-18	2000	I	NY	BOZMAN IMPORTS LTD.	UNION TROPICAL FISH FARM	NA	Cynops pyrrhogaster	Cynops pyrrhogaster
2000726514	XELA	amphibian	Amphibia	Xenopus	laevis	NA	AFRICAN CLAWED	TOAD	LIV	1375	NO	206	HK	HK	T	W	C	C	2000-03-22	2000	2000-03-18	2000	I	NY	BOZMAN IMPORTS LTD.	UNION TROPICAL FISH FARM	NA	Xenopus laevis	Xenopus laevis
2000738852	HYMC	amphibian	Amphibia	Hymenochirus	curtipes	NA	W. DWARF CLAWED	FROG	LIV	1600	NO	640	SG	SG	T	W	C	C	2000-03-18	2000	2000-03-18	2000	I	LA	AQUA-NAUTIC SPECIALIST	AQUANAUTICS SPECIALIST PTE	NA	Hymenochirus curtipes	Hymenochirus curtipes
2000739162	HYMC	amphibian	Amphibia	Hymenochirus	curtipes	NA	W. DWARF CLAWED	FROG	LIV	2000	NO	460	HK	HK	T	W	C	C	2000-03-19	2000	2000-03-18	2000	I	LA	AQUACO, INC.	DRAGON FISHERIES	NA	Hymenochirus curtipes	Hymenochirus curtipes
2000746181	XELA	amphibian	Amphibia	Xenopus	laevis	NA	AFRICAN CLAWED	TOAD	LIV	260	NO	31	NG	NG	T	W	C	C	2000-04-18	2000	2000-03-18	2000	I	NW	GLOBAL TROPICAL RESOURCES INC.	SPIVAP NIGERIA LTD	NA	Xenopus laevis	Xenopus laevis
2000760077	HYMC	amphibian	Amphibia	Hymenochirus	curtipes	NA	W. DWARF CLAWED	FROG	LIV	200	NO	40	HK	HK	T	W	C	C	2000-03-30	2000	2000-03-18	2000	I	NY	ERDA INC.	BROTHER AQUARIUM	NA	Hymenochirus curtipes	Hymenochirus curtipes
2000739124	HYMB	amphibian	Amphibia	Hymenochirus	boettgeri	NA	ZAIRE DWARF CLAWED	FROG	LIV	1500	NO	165	HK	HK	T	W	C	C	2000-03-19	2000	2000-03-19	2000	I	LA	GLOBAL AQUATIC CONSULTING	BOKO EXPRESS COMPANY	NA	Hymenochirus boettgeri	Hymenochirus boettgeri
2000739129	HYMC	amphibian	Amphibia	Hymenochirus	curtipes	NA	W. DWARF CLAWED	FROG	LIV	1400	NO	560	SG	SG	T	C	C	C	2000-03-19	2000	2000-03-19	2000	I	LA	AQUA-NAUTIC SPECIALIST	AQUANAUTICS SPECIALIST PTE LIMITED	NA	Hymenochirus curtipes	Hymenochirus curtipes
2000740047	LICA	amphibian	Amphibia	Litoria	caerulea	NA	WHITE'S TREE	FROG	LIV	1428	NO	2142	ID	ID	T	W	C	C	2000-03-19	2000	2000-03-19	2000	I	LA	AQUA-NAUTIC SPECIALIST	BEKAEL ESKA GEMILANG P.T.	NA	Litoria caerulea	Litoria caerulea
2000740063	HYMC	amphibian	Amphibia	Hymenochirus	curtipes	NA	W. DWARF CLAWED	FROG	LIV	1600	NO	640	SG	SG	T	C	C	C	2000-03-19	2000	2000-03-19	2000	I	LA	AQUA-NAUTIC SPECIALIST	AQUANAUTICS SPECIALIST PTE LTD	NA	Hymenochirus curtipes	Hymenochirus curtipes
2000741070	XELA	amphibian	Amphibia	Xenopus	laevis	NA	AFRICAN CLAWED	TOAD	LIV	70	NO	4	SG	SG	T	W	C	C	2000-03-22	2000	2000-03-19	2000	I	NY	BOZMAN IMPORTS LTD.	AQUAWORLD TROPICAL FISH	NA	Xenopus laevis	Xenopus laevis
2000748895	CYOR	amphibian	Amphibia	Cynops	orientalis	NA	CHINESE DWARF	NEWT	LIV	6000	NO	561	CN	CN	T	W	C	C	2000-03-19	2000	2000-03-19	2000	I	LA	DOLPHIN INTERNATIONAL	SHANGHAI GOLDEN FIELD	NA	Cynops orientalis	Cynops orientalis
2000748895	PACB	amphibian	Amphibia	Pachytriton	brevipes	NA	TSITOU	NEWT	LIV	200	NO	82	CN	CN	T	W	C	C	2000-03-19	2000	2000-03-19	2000	I	LA	DOLPHIN INTERNATIONAL	SHANGHAI GOLDEN FIELD	NA	Pachytriton brevipes	Pachytriton brevipes
2000748897	OOLI	amphibian	Amphibia	Occidozyga	lima	NA	PADDY	FROG	LIV	1350	NO	54	ID	ID	T	W	C	C	2000-03-19	2000	2000-03-19	2000	I	LA	DOLPHIN INTERNATIONAL	VIVAJAYA INTERNATIONAL	Original value in 'genus' column: ooedozyga	Occidozyga lima	Occidozyga lima
2000748901	CYOR	amphibian	Amphibia	Cynops	orientalis	NA	CHINESE DWARF	NEWT	LIV	3950	NO	397	HK	HK	T	W	C	C	2000-03-19	2000	2000-03-19	2000	I	LA	DOLPHIN INTERNATIONAL	SANWOO FISHERIES	NA	Cynops orientalis	Cynops orientalis
2000748901	HYMC	amphibian	Amphibia	Hymenochirus	curtipes	NA	W. DWARF CLAWED	FROG	LIV	4200	NO	462	HK	HK	T	W	C	C	2000-03-19	2000	2000-03-19	2000	I	LA	DOLPHIN INTERNATIONAL	SANWOO FISHERIES	NA	Hymenochirus curtipes	Hymenochirus curtipes
2000748912	CYOR	amphibian	Amphibia	Cynops	orientalis	NA	CHINESE DWARF	NEWT	LIV	225	NO	79	HK	HK	T	W	C	C	2000-03-19	2000	2000-03-19	2000	I	LA	DOLPHIN INTERNATIONAL	UNION TROPICAL FISH FARM LIMITED	NA	Cynops orientalis	Cynops orientalis
2000748918	HYMC	amphibian	Amphibia	Hymenochirus	curtipes	NA	W. DWARF CLAWED	FROG	LIV	2100	NO	168	ID	ID	T	W	C	C	2000-03-19	2000	2000-03-19	2000	I	LA	DOLPHIN INTERNATIONAL	VIVARIA INDONESIA P.T.	NA	Hymenochirus curtipes	Hymenochirus curtipes
2000748918	LICA	amphibian	Amphibia	Litoria	caerulea	NA	WHITE'S TREE	FROG	LIV	260	NO	348	ID	ID	T	W	C	C	2000-03-19	2000	2000-03-19	2000	I	LA	DOLPHIN INTERNATIONAL	VIVARIA INDONESIA P.T.	NA	Litoria caerulea	Litoria caerulea
2000748918	OOLI	amphibian	Amphibia	Occidozyga	lima	NA	PADDY	FROG	LIV	375	NO	29	ID	ID	T	W	C	C	2000-03-19	2000	2000-03-19	2000	I	LA	DOLPHIN INTERNATIONAL	VIVARIA INDONESIA P.T.	Original value in 'genus' column: ooedozyga	Occidozyga lima	Occidozyga lima
2000751616	ANCT	amphibian	Amphibia	NA	NA	NA	NON-CITES	AMPHIBIANS	LIV	2700	NO	987	TW	TW	T	C	C	C	2000-03-17	2000	2000-03-19	2000	I	DF	SPECIALTY PRODUCTS TRADING CO.	ESTATER GALLEN INTERNATIONAL TRADE	NA	Na na	NA
2000740633	RACA	amphibian	Amphibia	Rana	catesbeiana	NA	NA	BULLFROG	LIV	5000	NO	1029	TW	TW	T	W	C	C	2000-04-03	2000	2000-03-20	2000	I	NY	KIN YICK TRADING CORPORATION	ESTATE GALLEON INTL TRADE	Original value in 'species' column: catesbeinana	Rana catesbeiana	Rana catesbeiana
2000769812	PBIF	amphibian	Amphibia	Phrynomantis	bifasciatus	NA	S AFR SNAKE-NECK	FROG	LIV	60	NO	30	TZ	TZ	T	W	C	C	2000-03-20	2000	2000-03-20	2000	I	LA	L. A. REPTILE	KISASE INVESTMENTS	NA	Phrynomantis bifasciatus	Phrynomantis bifasciatus
2000789161	RACA	amphibian	Amphibia	Rana	catesbeiana	NA	NA	BULLFROG	LIV	600	NO	168	DO	DO	T	C	C	C	2000-08-29	2000	2000-03-20	2000	I	NW	NORTH SEA TRADING CORPORATION	HECTOR ANT. TORO	Original value in 'species' column: catesbeinana	Rana catesbeiana	Rana catesbeiana
2000794944	RACA	amphibian	Amphibia	Rana	catesbeiana	NA	NA	BULLFROG	SPE	1065	NO	660	MX	MX	T	W	C	C	2000-03-20	2000	2000-03-20	2000	I	NG	RANACO CORPORATION	P.A.M.E.E.S.A.	Original value in 'species' column: catesbeinana	Rana catesbeiana	Rana catesbeiana
2000794944	RAFO	amphibian	Amphibia	Rana	forreri	NA	FORRER'S GRASS	FROG	SPE	4545	NO	1890	MX	MX	T	W	C	C	2000-03-20	2000	2000-03-20	2000	I	NG	RANACO CORPORATION	P.A.M.E.E.S.A.	NA	Rana forreri	Rana forreri
2000762709	AMBA	amphibian	Amphibia	Ambystoma	maculatum	NA	SPOTTED	SALAMANDER	CLA	192	NO	0	CA	CA	S	W	C	C	2000-03-30	2000	2000-03-21	2000	I	SE	MATSON'S LABORATORY	CANADIAN WILDLIFE SERVICE	NA	Ambystoma maculatum	Ambystoma maculatum
2000740619	RACA	amphibian	Amphibia	Rana	catesbeiana	NA	NA	BULLFROG	LIV	3000	NO	945	TW	TW	T	W	C	C	2000-04-04	2000	2000-03-22	2000	I	NY	HOY LUNG SEAFOOD CORPORATION	HORREI FISHERY COMPANY	Original value in 'species' column: catesbeinana	Rana catesbeiana	Rana catesbeiana
2000740680	RACA	amphibian	Amphibia	Rana	catesbeiana	NA	NA	BULLFROG	LIV	3000	NO	945	TW	TW	T	W	C	C	2000-03-30	2000	2000-03-22	2000	I	NY	HOY LUNG SEAFOOD CORPORATION	HORREI FISHERY CO	Original value in 'species' column: catesbeinana	Rana catesbeiana	Rana catesbeiana
2000745031	ANCT	amphibian	Amphibia	NA	NA	NA	NON-CITES	AMPHIBIANS	LIV	500	NO	100	NG	NG	T	W	C	C	2000-03-22	2000	2000-03-22	2000	I	SF	PAN OCEAN AQUARIUM	ALL WELL TROPICAL	NA	Na na	NA
2000745751	RMAC	amphibian	Amphibia	Rana	macrodon	NA	NA	BULLFROG	LEG	17704	KG	93818	CN	CN	T	W	C	C	2000-03-22	2000	2000-03-22	2000	I	NW	ROBERT W. CHAN INC.	SHANTOU CITY CERIALS AND FOODSTUFF PRODUCTS ENTERP	NA	Rana macrodon	NA
2000747142	MAAU	amphibian	Amphibia	Mantella	aurantiaca	NA	MALAGASY GOLDEN	MANTELLA	LIV	100	NO	500	MG	MG	T	W	C	C	2000-03-22	2000	2000-03-22	2000	I	LA	L. A. REPTILE	RAJAOFFERSON'S PETFARM	NA	Mantella aurantiaca	Mantella aurantiaca
2000745659	XELA	amphibian	Amphibia	Xenopus	laevis	NA	AFRICAN CLAWED	TOAD	LIV	300	NO	44	CZ	CZ	T	C	C	C	2000-03-28	2000	2000-03-23	2000	I	NW	METROPOLITAN FISH COMPANY LLC	PETRA AQUA	NA	Xenopus laevis	Xenopus laevis
2000745815	RAPI	amphibian	Amphibia	Rana	pipiens	NA	NORTHERN LEOPARD	FROG	BOD	35	NO	5000	US	ES	non-standard value	W	C	C	2000-03-24	2000	2000-03-23	2000	I	SF	SHIP/ART INT'L	NA	Original value in 'purpose' column: N	Rana pipiens	Rana pipiens
2000789409	RACA	amphibian	Amphibia	Rana	catesbeiana	NA	NA	BULLFROG	LIV	5000	NO	506	DO	DO	T	C	C	C	2000-08-29	2000	2000-03-23	2000	I	NW	TIN TIN FISH TRADING INC.	LIVE FROGS	Original value in 'species' column: catesbeinana	Rana catesbeiana	Rana catesbeiana
2000793070	RMAC	amphibian	Amphibia	Rana	macrodon	NA	NA	BULLFROG	LEG	906	KG	2600	VN	VN	T	W	C	C	2000-03-23	2000	2000-03-23	2000	I	NW	EVERGREEN IMPORT & EXPORT	VIET LONG FROZEN FOOD ENTERPRISE	NA	Rana macrodon	NA
2000715325	MAAU	amphibian	Amphibia	Mantella	aurantiaca	NA	MALAGASY GOLDEN	MANTELLA	LIV	500	NO	3000	MG	MG	T	W	R	C	2000-03-24	2000	2000-03-24	2000	I	MI	NA	NA	NA	Mantella aurantiaca	Mantella aurantiaca
2000744009	HYMB	amphibian	Amphibia	Hymenochirus	boettgeri	NA	ZAIRE DWARF CLAWED	FROG	LIV	2000	NO	100	HK	HK	T	W	C	C	2000-03-23	2000	2000-03-24	2000	I	AT	FINN'S AQUATICS INC.	FORTUNE WIDE ASIA	NA	Hymenochirus boettgeri	Hymenochirus boettgeri
2000748233	CYOR	amphibian	Amphibia	Cynops	orientalis	NA	CHINESE DWARF	NEWT	LIV	6000	NO	360	CN	CN	T	W	C	C	2000-03-24	2000	2000-03-24	2000	I	LA	R. H. PET INCORPORATED	SAB FUQI IMPORT & EXPORT CO LIMITED	NA	Cynops orientalis	Cynops orientalis
2000783289	MANB	amphibian	Amphibia	Mantella	betsileo	NA	BETSILEO GOLDEN	MANTELLA	LIV	70	NO	210	MG	MG	T	W	C	C	2000-03-24	2000	2000-03-24	2000	I	MI	STUBBS, RICHARD A	SOCIETE FAUNA EXPORT	NA	Mantella betsileo	Mantella betsileo
2000783289	MANV	amphibian	Amphibia	Mantella	viridis	NA	GREEN GOLDEN	MANTELLA	LIV	70	NO	263	MG	MG	T	W	C	C	2000-03-24	2000	2000-03-24	2000	I	MI	STUBBS, RICHARD A	SOCIETE FAUNA EXPORT	NA	Mantella viridis	Mantella viridis
2000783289	MNLA	amphibian	Amphibia	Mantella	laevigata	NA	FOLOHY GOLDEN	MANTELLA	LIV	54	NO	284	MG	MG	T	W	C	C	2000-03-24	2000	2000-03-24	2000	I	MI	STUBBS, RICHARD A	SOCIETE FAUNA EXPORT	NA	Mantella laevigata	Mantella laevigata
2000783289	SCGO	amphibian	Amphibia	Scaphiophryne	gottlebei	NA	GOTTLEBE'S MICROHY	FROG	LIV	50	NO	563	MG	MG	T	W	C	C	2000-03-24	2000	2000-03-24	2000	I	MI	STUBBS, RICHARD A	SOCIETE FAUNA EXPORT	NA	Scaphiophryne gottlebei	Scaphiophryne gottlebei
2000783289	SPUS	amphibian	Amphibia	Scaphiophryne	pustulosa	NA	GREEN RAIN	FROG	LIV	70	NO	315	MG	MG	T	W	C	C	2000-03-24	2000	2000-03-24	2000	I	MI	STUBBS, RICHARD A	SOCIETE FAUNA EXPORT	NA	Scaphiophryne pustulosa	NA
2000789410	RACA	amphibian	Amphibia	Rana	catesbeiana	NA	NA	BULLFROG	LIV	1100	NO	312	DO	DO	T	C	C	C	2000-08-29	2000	2000-03-24	2000	I	NW	NORTH SEA TRADING CORPORATION	HECTOR ANT TORO	Original value in 'species' column: catesbeinana	Rana catesbeiana	Rana catesbeiana
2000794581	BMAR	amphibian	Amphibia	Bufo	marinus	NA	NEOTROPICAL	TOAD	SPE	20	NO	10	MX	MX	T	W	C	C	2000-03-27	2000	2000-03-24	2000	I	NG	RANACO CORPORATION	P.A.M.E.E.S.A.	NA	Bufo marinus	NA
2000794581	RACA	amphibian	Amphibia	Rana	catesbeiana	NA	NA	BULLFROG	SPE	135	NO	182	MX	MX	T	W	C	C	2000-03-27	2000	2000-03-24	2000	I	NG	RANACO CORPORATION	P.A.M.E.E.S.A.	Original value in 'species' column: catesbeinana	Rana catesbeiana	Rana catesbeiana
2000794581	RAFO	amphibian	Amphibia	Rana	forreri	NA	FORRER'S GRASS	FROG	SPE	4904	NO	2160	MX	MX	T	W	C	C	2000-03-27	2000	2000-03-24	2000	I	NG	RANACO CORPORATION	P.A.M.E.E.S.A.	NA	Rana forreri	Rana forreri
2000747544	LICA	amphibian	Amphibia	Litoria	caerulea	NA	WHITE'S TREE	FROG	LIV	1212	NO	3242	ID	ID	T	W	C	C	2000-03-25	2000	2000-03-25	2000	I	LA	AQUA-NAUTIC SPECIALIST	BEKAEL ESKA GEMILANG P.T.	NA	Litoria caerulea	Litoria caerulea
2000798235	CHIP	amphibian	Amphibia	Chiromantis	petersii	NA	PETER'S F-NST TREE	FROG	LIV	200	NO	300	TZ	TZ	T	U	C	C	2000-03-25	2000	2000-03-25	2000	I	MI	GLOBAL IMPORT/EXPORT	KOORI INVESTMENT	NA	Chiromantis petersii	Chiromantis petersii
2000741672	XELA	amphibian	Amphibia	Xenopus	laevis	NA	AFRICAN CLAWED	TOAD	LIV	140	NO	8	SG	SG	T	W	C	C	2000-03-28	2000	2000-03-26	2000	I	NY	BOZMAN IMPORTS LTD.	AQUAWORLD TROICAL FISH	NA	Xenopus laevis	Xenopus laevis
2000741697	OOLI	amphibian	Amphibia	Occidozyga	lima	NA	PADDY	FROG	LIV	150	NO	14	ID	ID	T	W	C	C	2000-03-28	2000	2000-03-26	2000	I	NY	BOZMAN IMPORTS LTD.	VIAJAYA INTL	Original value in 'genus' column: ooedozyga	Occidozyga lima	Occidozyga lima
2000745915	RACA	amphibian	Amphibia	Rana	catesbeiana	NA	NA	BULLFROG	LIV	5000	NO	1155	EC	EC	T	C	C	C	2000-03-30	2000	2000-03-26	2000	I	NW	KIN YICK TRADING CORPORATION	ASOCIATION DE PRODUCTORES DE RANAS	Original value in 'species' column: catesbeinana	Rana catesbeiana	Rana catesbeiana
2000748534	KALO	amphibian	Amphibia	Kaloula	pulchra	NA	ASIATIC PAINTED	FROG	LIV	113	NO	45	VN	VN	T	W	C	C	2000-03-26	2000	2000-03-26	2000	I	LA	UNIVERSAL AQUATIC	CORIMEX	NA	Kaloula pulchra	Kaloula pulchra
2000748818	HYMC	amphibian	Amphibia	Hymenochirus	curtipes	NA	W. DWARF CLAWED	FROG	LIV	300	NO	24	ID	ID	T	C	C	C	2000-03-26	2000	2000-03-26	2000	I	LA	DOLPHIN INTERNATIONAL	VIVARIA INDONESIA P.T.	NA	Hymenochirus curtipes	Hymenochirus curtipes
2000748818	LICA	amphibian	Amphibia	Litoria	caerulea	NA	WHITE'S TREE	FROG	LIV	590	NO	830	ID	ID	T	C	C	C	2000-03-26	2000	2000-03-26	2000	I	LA	DOLPHIN INTERNATIONAL	VIVARIA INDONESIA P.T.	NA	Litoria caerulea	Litoria caerulea
2000748818	OOLI	amphibian	Amphibia	Occidozyga	lima	NA	PADDY	FROG	LIV	600	NO	42	ID	ID	T	W	C	C	2000-03-26	2000	2000-03-26	2000	I	LA	DOLPHIN INTERNATIONAL	VIVARIA INDONESIA P.T.	Original value in 'genus' column: ooedozyga	Occidozyga lima	Occidozyga lima
2000748824	HYMB	amphibian	Amphibia	Hymenochirus	boettgeri	NA	ZAIRE DWARF CLAWED	FROG	LIV	50	NO	50	HK	HK	T	W	C	C	2000-03-26	2000	2000-03-26	2000	I	LA	SALINAS, ADRIAN	CEYLON AQUARIUM	NA	Hymenochirus boettgeri	Hymenochirus boettgeri
2000748841	CYOR	amphibian	Amphibia	Cynops	orientalis	NA	CHINESE DWARF	NEWT	LIV	5050	NO	434	HK	HK	T	W	C	C	2000-03-26	2000	2000-03-26	2000	I	LA	DOLPHIN INTERNATIONAL	SANWOO FISHERIES	NA	Cynops orientalis	Cynops orientalis
2000748841	HYMC	amphibian	Amphibia	Hymenochirus	curtipes	NA	W. DWARF CLAWED	FROG	LIV	5600	NO	616	HK	HK	T	W	C	C	2000-03-26	2000	2000-03-26	2000	I	LA	DOLPHIN INTERNATIONAL	SANWOO FISHERIES	NA	Hymenochirus curtipes	Hymenochirus curtipes
2000748987	HYMB	amphibian	Amphibia	Hymenochirus	boettgeri	NA	ZAIRE DWARF CLAWED	FROG	LIV	1000	NO	110	HK	HK	T	W	C	C	2000-03-26	2000	2000-03-26	2000	I	LA	GLOBAL AQUATIC CONSULTING	BOKO EXPRESS COMPANY	NA	Hymenochirus boettgeri	Hymenochirus boettgeri
2000749842	HYMC	amphibian	Amphibia	Hymenochirus	curtipes	NA	W. DWARF CLAWED	FROG	LIV	1800	NO	414	HK	HK	T	W	C	C	2000-03-26	2000	2000-03-26	2000	I	LA	AQUACO, INC.	DRAGON FISHERIES	NA	Hymenochirus curtipes	Hymenochirus curtipes
2000788745	RACA	amphibian	Amphibia	Rana	catesbeiana	NA	NA	BULLFROG	LIV	5000	NO	254	DO	DO	T	C	C	C	2000-08-29	2000	2000-03-26	2000	I	NW	TIN TIN FISH TRADING INC.	LIVE FROGS DONING ANA	Original value in 'species' column: catesbeinana	Rana catesbeiana	Rana catesbeiana
2000168347	PHBC	amphibian	Amphibia	Phyllomedusa	bicolor	NA	GIANT MONKEY	FROG	LIV	33	NO	825	SR	SR	T	W	C	C	2000-03-28	2000	2000-03-27	2000	I	MI	MIAMI REPTILE	NA	NA	Phyllomedusa bicolor	Phyllomedusa bicolor
2000168347	PHHP	amphibian	Amphibia	Phyllomedusa	hypocondrialis	NA	ORANGE-LEGGED LEAF	FROG	LIV	32	NO	96	SR	SR	T	W	C	C	2000-03-28	2000	2000-03-27	2000	I	MI	MIAMI REPTILE	NA	NA	Phyllomedusa hypocondrialis	NA
2000715388	SASA	amphibian	Amphibia	Salamandra	salamandra	NA	EUROPEAN FIRE	SALAMANDER	LIV	14	NO	35	ES	ES	T	W	R	S	2000-03-27	2000	2000-03-27	2000	I	NY	NA	NA	NA	Salamandra salamandra	Salamandra salamandra
2000715388	SASA	amphibian	Amphibia	Salamandra	salamandra	NA	EUROPEAN FIRE	SALAMANDER	DEA	12	NO	1	ES	ES	T	W	R	S	2000-03-27	2000	2000-03-27	2000	I	NY	NA	NA	NA	Salamandra salamandra	Salamandra salamandra
2000715392	SASA	amphibian	Amphibia	Salamandra	salamandra	NA	EUROPEAN FIRE	SALAMANDER	DEA	12	NO	1	ES	ES	T	W	R	S	2000-03-28	2000	2000-03-27	2000	I	NY	NA	NA	NA	Salamandra salamandra	Salamandra salamandra
2000715392	SASA	amphibian	Amphibia	Salamandra	salamandra	NA	EUROPEAN FIRE	SALAMANDER	LIV	14	NO	35	ES	ES	T	W	R	S	2000-03-28	2000	2000-03-27	2000	I	NY	NA	NA	NA	Salamandra salamandra	Salamandra salamandra
2000749014	LIAU	amphibian	Amphibia	Litoria	aurea	NA	GREEN & GOLD BELL	FROG	LIV	1950	NO	2085	NZ	NZ	T	W	C	C	2000-03-27	2000	2000-03-27	2000	I	LA	CALIFORNIA ZOOLOGICAL SUPPLY	BURBANK GOLDFISH	NA	Litoria aurea	Litoria aurea
2000752428	RACA	amphibian	Amphibia	Rana	catesbeiana	NA	NA	BULLFROG	LIV	1400	NO	406	DO	DO	T	C	C	C	2000-04-11	2000	2000-03-27	2000	I	NW	NORTH SEA TRADING CORPORATION	HECTOR ANT. TORO	Original value in 'species' column: catesbeinana	Rana catesbeiana	Rana catesbeiana
2000743264	XELA	amphibian	Amphibia	Xenopus	laevis	NA	AFRICAN CLAWED	TOAD	LIV	1300	NO	4420	CL	CL	T	W	C	C	2000-04-03	2000	2000-03-28	2000	I	CH	XENOPUS I, INC.	CARLOS FRANCISCO DEL RIO CAMUS	NA	Xenopus laevis	Xenopus laevis
2000744442	RACA	amphibian	Amphibia	Rana	catesbeiana	NA	NA	BULLFROG	LIV	10000	KG	34564	TW	TW	T	W	C	C	2000-03-28	2000	2000-03-28	2000	I	SF	NOR-CAL SEAFOOD INC.	PENSETO SEAFOOD CO LIMITED	Original value in 'species' column: catesbeinana	Rana catesbeiana	Rana catesbeiana
2000746341	RACA	amphibian	Amphibia	Rana	catesbeiana	NA	NA	BULLFROG	LIV	5000	NO	1271	EC	EC	T	C	C	C	2000-04-13	2000	2000-03-28	2000	I	NW	KIN YICK TRADING CORPORATION	VIVACOE Y CIA	Original value in 'species' column: catesbeinana	Rana catesbeiana	Rana catesbeiana
2000748798	KALO	amphibian	Amphibia	Kaloula	pulchra	NA	ASIATIC PAINTED	FROG	LIV	40	NO	52	VN	VN	T	W	C	C	2000-03-28	2000	2000-03-28	2000	I	LA	CONFICO LIMITED	GNATURE	NA	Kaloula pulchra	Kaloula pulchra
2000748798	RLEU	amphibian	Amphibia	Rhacophorus	leucomystax	NA	FLYING	FROG	LIV	80	NO	24	VN	VN	T	W	C	C	2000-03-28	2000	2000-03-28	2000	I	LA	CONFICO LIMITED	GNATURE	NA	Rhacophorus leucomystax	NA
2000748799	HYMC	amphibian	Amphibia	Hymenochirus	curtipes	NA	W. DWARF CLAWED	FROG	LIV	250	NO	25	NG	NG	T	W	C	C	2000-03-28	2000	2000-03-28	2000	I	LA	AQUA-NAUTIC SPECIALIST	JUDE INTERNATIONAL TRADING	NA	Hymenochirus curtipes	Hymenochirus curtipes
2000779077	AGCL	amphibian	Amphibia	Agalychnis	callidryas	NA	RED-EYED TREE	FROG	LIV	2	NO	16	GT	GT	T	U	C	C	2000-03-28	2000	2000-03-28	2000	I	MI	GLOBAL TROPICAL REPTILES	GUATAMALTEX	NA	Agalychnis callidryas	Agalychnis callidryas
2000796786	RACA	amphibian	Amphibia	Rana	catesbeiana	NA	NA	BULLFROG	LPL	2	NO	1200	ID	IT	T	W	C	C	2000-03-30	2000	2000-03-28	2000	I	NY	DG USA INC.	FONTANA PELLETTERIE S.P.A.	Original value in 'species' column: catesbeinana	Rana catesbeiana	Rana catesbeiana
2000748859	MENA	amphibian	Amphibia	Megophrys	nasuta	NA	SPADEFOOT	TOAD	LIV	144	NO	1080	MY	MY	T	W	C	C	2000-03-29	2000	2000-03-29	2000	I	LA	L. A. REPTILE	CBS WILDLIFE	NA	Megophrys nasuta	Pelobatrachus nasuta
2000749830	CYOR	amphibian	Amphibia	Cynops	orientalis	NA	CHINESE DWARF	NEWT	LIV	400	NO	20	CN	CN	T	W	C	C	2000-03-31	2000	2000-03-29	2000	I	NY	MIN HUA ENTERPRISE, INC.	SHANGHAI ESWELL ENTERPRISE	NA	Cynops orientalis	Cynops orientalis
2000750647	RACA	amphibian	Amphibia	Rana	catesbeiana	NA	NA	BULLFROG	LPL	1	NO	630	ID	IT	T	W	C	C	2000-03-30	2000	2000-03-29	2000	I	NY	DG BAL, HARBOUR, INC.	FONTANA PELLETTERIE	Original value in 'species' column: catesbeinana	Rana catesbeiana	Rana catesbeiana
2000751156	HYSE	amphibian	Amphibia	Hyla	septentrionalis	NA	CUBAN TREE	FROG	SPR	10944	NO	255	CN	HK	T	W	C	C	2000-03-30	2000	2000-03-29	2000	I	AN	MISSISSIPPI PLASTICS INC.	HEAD CROWN TRADING LTD	NA	Hyla septentrionalis	NA
2000831234	LARG	amphibian	Amphibia	Leptopelis	argenteus	NA	BAGAM. FOREST TREE	FROG	LIV	100	NO	200	TZ	TZ	T	U	C	C	2000-03-29	2000	2000-03-29	2000	I	MI	GLOBAL TROPICAL IMPORT/EXPORTS	AMANDLA ANIMAL FARM	NA	Leptopelis argenteus	Leptopelis argenteus
2000744129	XELA	amphibian	Amphibia	Xenopus	laevis	NA	AFRICAN CLAWED	TOAD	LIV	700	NO	1400	ZA	ZA	T	W	C	C	2000-03-30	2000	2000-03-30	2000	I	AT	XENOPUS EXPRESS	PLUCK, GUY	NA	Xenopus laevis	Xenopus laevis
2000747168	DEPI	amphibian	Amphibia	Epipedobates	pictus	NA	SPOT-LEGGED	POISON-ARROW FROG	LIV	102	NO	408	PE	PE	T	W	C	C	2000-03-30	2000	2000-03-30	2000	I	LA	L. A. REPTILE	REPTILE EXPORT	NA	Epipedobates pictus	Ameerega picta
2000747168	DERE	amphibian	Amphibia	Dendrobates	reticulatus	NA	RETICULATED	POISON-ARROW FROG	LIV	65	NO	390	PE	PE	T	W	C	C	2000-03-30	2000	2000-03-30	2000	I	LA	L. A. REPTILE	REPTILE EXPORT	NA	Dendrobates reticulatus	Ranitomeya reticulata
2000789227	RACA	amphibian	Amphibia	Rana	catesbeiana	NA	NA	BULLFROG	LIV	5000	NO	502	DO	DO	T	C	C	C	2000-08-29	2000	2000-03-30	2000	I	NW	TIN TIN FISH TRADING INC	LIVE FROGS	Original value in 'species' column: catesbeinana	Rana catesbeiana	Rana catesbeiana
2000752664	RACA	amphibian	Amphibia	Rana	catesbeiana	NA	NA	BULLFROG	LIV	1500	NO	431	DO	DO	T	C	C	C	2000-04-11	2000	2000-03-31	2000	I	NW	NORTH SEA TRADING CORPORATION	HECTOR ANT. TORO	Original value in 'species' column: catesbeinana	Rana catesbeiana	Rana catesbeiana
2000752873	LICA	amphibian	Amphibia	Litoria	caerulea	NA	WHITE'S TREE	FROG	LIV	200	NO	515	ID	ID	T	W	C	C	2000-03-31	2000	2000-03-31	2000	I	DF	TEPEDELEN, KAMURAN/TEPEDELEN ENTERPRISES INC.	CV TERRARIA INDONESIA	NA	Litoria caerulea	Litoria caerulea
2000752873	MENA	amphibian	Amphibia	Megophrys	nasuta	NA	SPADEFOOT	TOAD	LIV	50	NO	258	ID	ID	T	W	C	C	2000-03-31	2000	2000-03-31	2000	I	DF	TEPEDELEN, KAMURAN/TEPEDELEN ENTERPRISES INC.	CV TERRARIA INDONESIA	NA	Megophrys nasuta	Pelobatrachus nasuta
2000794976	RACA	amphibian	Amphibia	Rana	catesbeiana	NA	NA	BULLFROG	SPE	105	NO	110	MX	MX	T	W	C	C	2000-03-31	2000	2000-03-31	2000	I	NG	RANACO CORPORATION	P.A.M.E.E.S.A.	Original value in 'species' column: catesbeinana	Rana catesbeiana	Rana catesbeiana
2000794976	RAFO	amphibian	Amphibia	Rana	forreri	NA	FORRER'S GRASS	FROG	SPE	17410	NO	8190	MX	MX	T	W	C	C	2000-03-31	2000	2000-03-31	2000	I	NG	RANACO CORPORATION	P.A.M.E.E.S.A.	NA	Rana forreri	Rana forreri
2000740551	ANCT	amphibian	Amphibia	NA	NA	NA	NON-CITES	AMPHIBIANS	LIV	3175	NO	21	HK	HK	T	W	C	C	2000-04-03	2000	2000-04-01	2000	I	NY	TRANSSHIP DISCOUNTS LTD.	UNION TROPICAL FISH FARM	NA	Na na	NA
2000747242	CEGU	amphibian	Amphibia	Ceratobatrachus	guentheri	NA	GUNTHER'S TRIANGLE	FROG	LIV	120	NO	240	SB	SB	T	W	C	C	2000-04-01	2000	2000-04-01	2000	I	LA	L. A. REPTILE	EX 2000/007	NA	Ceratobatrachus guentheri	NA
2000748274	HYMC	amphibian	Amphibia	Hymenochirus	curtipes	NA	W. DWARF CLAWED	FROG	LIV	1400	NO	560	SG	SG	T	W	C	C	2000-04-01	2000	2000-04-01	2000	I	LA	AQUA-NAUTIC SPECIALIST	AQUANAUTICS SPECIALIST PTE LTD	NA	Hymenochirus curtipes	Hymenochirus curtipes
2000747097	OOLI	amphibian	Amphibia	Occidozyga	lima	NA	PADDY	FROG	LIV	1200	NO	48	ID	ID	T	W	C	C	2000-04-02	2000	2000-04-02	2000	I	LA	DOLPHIN INTERNATIONAL	VIVAJAYA INTERNATIONAL	Original value in 'genus' column: ooedozyga	Occidozyga lima	Occidozyga lima
2000747101	HYMC	amphibian	Amphibia	Hymenochirus	curtipes	NA	W. DWARF CLAWED	FROG	LIV	600	NO	48	IN	IN	T	C	C	C	2000-04-02	2000	2000-04-02	2000	I	LA	DOLPHIN INTERNATIONAL	VIVARIA INDONESIA P.T.	NA	Hymenochirus curtipes	Hymenochirus curtipes
2000747101	LICA	amphibian	Amphibia	Litoria	caerulea	NA	WHITE'S TREE	FROG	LIV	60	NO	75	IN	IN	T	W	C	C	2000-04-02	2000	2000-04-02	2000	I	LA	DOLPHIN INTERNATIONAL	VIVARIA INDONESIA P.T.	NA	Litoria caerulea	Litoria caerulea
2000747101	OOLI	amphibian	Amphibia	Occidozyga	lima	NA	PADDY	FROG	LIV	450	NO	32	IN	IN	T	W	C	C	2000-04-02	2000	2000-04-02	2000	I	LA	DOLPHIN INTERNATIONAL	VIVARIA INDONESIA P.T.	Original value in 'genus' column: ooedozyga	Occidozyga lima	Occidozyga lima
2000747111	CYOR	amphibian	Amphibia	Cynops	orientalis	NA	CHINESE DWARF	NEWT	LIV	450	NO	117	CN	HK	T	W	C	C	2000-04-02	2000	2000-04-02	2000	I	LA	DOLPHIN INTERNATIONAL	SANWOO FISHERIES	NA	Cynops orientalis	Cynops orientalis
2000747111	HYMC	amphibian	Amphibia	Hymenochirus	curtipes	NA	W. DWARF CLAWED	FROG	LIV	4200	NO	462	HK	HK	T	C	C	C	2000-04-02	2000	2000-04-02	2000	I	LA	DOLPHIN INTERNATIONAL	SANWOO FISHERIES	NA	Hymenochirus curtipes	Hymenochirus curtipes
2000747316	CYOR	amphibian	Amphibia	Cynops	orientalis	NA	CHINESE DWARF	NEWT	LIV	6900	NO	966	CN	CN	T	W	C	C	2000-04-02	2000	2000-04-02	2000	I	LA	DOLPHIN INTERNATIONAL	SHANGHAI GOLDEN FIELD GARDENING CO LIMITED	NA	Cynops orientalis	Cynops orientalis
2000747406	HYMC	amphibian	Amphibia	Hymenochirus	curtipes	NA	W. DWARF CLAWED	FROG	LIV	1200	NO	480	SG	SG	T	C	C	C	2000-04-02	2000	2000-04-02	2000	I	LA	AQUA-NAUTIC SPECIALIST	AQUANAUTICS SPECIALIST PTE LTD	NA	Hymenochirus curtipes	Hymenochirus curtipes
2000748210	HYMC	amphibian	Amphibia	Hymenochirus	curtipes	NA	W. DWARF CLAWED	FROG	LIV	850	NO	271	HK	HK	T	W	C	C	2000-04-02	2000	2000-04-02	2000	I	LA	AQUACO, INC.	DRAGON FISHERIES	NA	Hymenochirus curtipes	Hymenochirus curtipes
2000748805	HYMC	amphibian	Amphibia	Hymenochirus	curtipes	NA	W. DWARF CLAWED	FROG	LIV	1700	NO	680	SG	SG	T	W	C	C	2000-04-02	2000	2000-04-02	2000	I	LA	AQUA-NAUTIC SPECIALIST	AQUANAUTICS SPECIALIST PTE LIMITED	NA	Hymenochirus curtipes	Hymenochirus curtipes
2000789225	RACA	amphibian	Amphibia	Rana	catesbeiana	NA	NA	BULLFROG	LIV	5000	NO	501	DO	DO	T	C	C	C	2000-08-29	2000	2000-04-02	2000	I	NW	TIN TIN FISH TRADING INC	LIVE FROGS	Original value in 'species' column: catesbeinana	Rana catesbeiana	Rana catesbeiana
2000804273	CECW	amphibian	Amphibia	Ceratophrys	cranwelli	NA	CRANWELL'S HORNED	FROG	LIV	60	NO	1080	PY	PY	T	U	C	C	2000-04-12	2000	2000-04-02	2000	I	MI	GAMA SUPPLIERS, INC.	AMAZONAS ACUARIO	NA	Ceratophrys cranwelli	Ceratophrys cranwelli
2000804273	LLAE	amphibian	Amphibia	Lepidobatrachus	laevis	NA	BUDGETT'S	FROG	LIV	18	NO	288	PY	PY	T	U	C	C	2000-04-12	2000	2000-04-02	2000	I	MI	GAMA SUPPLIERS, INC.	AMAZONAS ACUARIO	NA	Lepidobatrachus laevis	Lepidobatrachus laevis
2000804273	PHSA	amphibian	Amphibia	Phyllomedusa	sauvagii	NA	PAINT-BELLY MONKEY	FROG	LIV	30	NO	450	PY	PY	T	U	C	C	2000-04-12	2000	2000-04-02	2000	I	MI	GAMA SUPPLIERS, INC.	AMAZONAS ACUARIO	NA	Phyllomedusa sauvagii	Phyllomedusa sauvagii
2000742456	RACA	amphibian	Amphibia	Rana	catesbeiana	NA	NA	BULLFROG	LIV	3000	NO	1029	TW	TW	T	W	C	C	2000-04-06	2000	2000-04-03	2000	I	NY	KIN YICK TRADING CORPORATION	ESTATE GALLEN INTERNATIONAL TRADE	Original value in 'species' column: catesbeinana	Rana catesbeiana	Rana catesbeiana
2000746665	PBIF	amphibian	Amphibia	Phrynomantis	bifasciatus	NA	S AFR SNAKE-NECK	FROG	LIV	200	NO	300	TG	TG	T	W	C	C	2000-04-03	2000	2000-04-03	2000	I	LA	L. A. REPTILE	NA	NA	Phrynomantis bifasciatus	Phrynomantis bifasciatus
2000752424	RACA	amphibian	Amphibia	Rana	catesbeiana	NA	NA	BULLFROG	LIV	1300	NO	375	DO	DO	T	C	C	C	2000-04-11	2000	2000-04-03	2000	I	NW	NORTH SEA TRADING CORPORATION	HECTOR ANT. TORO	Original value in 'species' column: catesbeinana	Rana catesbeiana	Rana catesbeiana
2000779093	HEMM	amphibian	Amphibia	Hemisus	marmoratus	NA	MARBLED SHOVELNOSE	FROG	LIV	100	NO	150	TZ	TZ	T	U	C	C	2000-04-10	2000	2000-04-03	2000	I	MI	EXOTIC REPTILES JUNGLE	SWAN INVESTMENTS	NA	Hemisus marmoratus	Hemisus marmoratus
2000779093	PBIF	amphibian	Amphibia	Phrynomantis	bifasciatus	NA	S AFR SNAKE-NECK	FROG	LIV	150	NO	225	TZ	TZ	T	U	C	C	2000-04-10	2000	2000-04-03	2000	I	MI	EXOTIC REPTILES JUNGLE	SWAN INVESTMENTS	NA	Phrynomantis bifasciatus	Phrynomantis bifasciatus
2000794704	RABE	amphibian	Amphibia	Rana	berlandieri	NA	RIO GRANDE	FROG	LIV	350	KG	2233	MX	MX	T	W	C	C	2000-04-03	2000	2000-04-03	2000	I	BV	RANA LABORATORIES	MONTALVO ALVARO GARZA	NA	Rana berlandieri	Rana berlandieri
2000745404	ANCT	amphibian	Amphibia	NA	NA	NA	NON-CITES	AMPHIBIANS	SPE	1	NO	0	PG	AU	non-standard value	W	C	C	2000-04-11	2000	2000-04-04	2000	I	HA	BISHIP MUSEUM	QUEENSLAND MUSEUM	Original value in 'purpose' column: N	Na na	NA
2000756840	RACA	amphibian	Amphibia	Rana	catesbeiana	NA	NA	BULLFROG	LIV	45	KG	1975	TW	CA	T	U	C	C	2000-04-06	2000	2000-04-04	2000	I	BN	MING'S SUPERMARKET INC.	BEAVER FISHERY	Original value in 'species' column: catesbeinana	Rana catesbeiana	Rana catesbeiana
2000746314	RACA	amphibian	Amphibia	Rana	catesbeiana	NA	NA	BULLFROG	LIV	726	KG	640	DO	DO	T	NA	C	C	2000-04-11	2000	2000-04-05	2000	I	NW	TIN TIN FISH TRADING INC.	LIVE FROGS DONONGANA PRESADEHATILLOCOTUI	Original value in 'species' column: catesbeinana	Rana catesbeiana	Rana catesbeiana
2000746698	BOOA	amphibian	Amphibia	Boophis	albilabris	NA	WHT-LIP BRIGHT-EYE	FROG	LIV	50	NO	150	MG	MG	T	W	C	C	2000-04-05	2000	2000-04-05	2000	I	LA	INTERNATIONAL DRAGON BREEDERS INC	NA	NA	Boophis albilabris	Boophis albilabris
2000746698	MAAU	amphibian	Amphibia	Mantella	aurantiaca	NA	MALAGASY GOLDEN	MANTELLA	LIV	50	NO	250	MG	MG	T	W	C	C	2000-04-05	2000	2000-04-05	2000	I	LA	INTERNATIONAL DRAGON BREEDERS INC	NA	NA	Mantella aurantiaca	Mantella aurantiaca
2000746698	MANV	amphibian	Amphibia	Mantella	viridis	NA	GREEN GOLDEN	MANTELLA	LIV	50	NO	200	MG	MG	T	W	C	C	2000-04-05	2000	2000-04-05	2000	I	LA	INTERNATIONAL DRAGON BREEDERS INC	NA	NA	Mantella viridis	Mantella viridis
2000746698	MCOW	amphibian	Amphibia	Mantella	cowani	NA	BLACK GOLDEN	MANTELLA	LIV	50	NO	300	MG	MG	T	W	C	C	2000-04-05	2000	2000-04-05	2000	I	LA	INTERNATIONAL DRAGON BREEDERS INC	NA	NA	Mantella cowani	NA
2000776591	AFFO	amphibian	Amphibia	Afrixalus	fornasini	NA	SILVER-BAND BANANA	FROG	BOD	12	NO	0	CG	GB	S	W	C	C	2000-04-05	2000	2000-04-05	2000	I	NY	AMERICAN MUSEUM OF NATURAL HISTORY	UNIVERSITY OF LEEDS	Original value in 'genus' column: afrilaxus	Afrixalus fornasini	Afrixalus fornasini
2000776591	AFFO	amphibian	Amphibia	Afrixalus	fornasini	NA	SILVER-BAND BANANA	FROG	BOD	6	NO	0	VG	GB	S	W	C	C	2000-04-05	2000	2000-04-05	2000	I	NY	AMERICAN MUSEUM OF NATURAL HISTORY	UNIVERSITY OF LEEDS	Original value in 'genus' column: afrilaxus	Afrixalus fornasini	Afrixalus fornasini
2000776591	AFFO	amphibian	Amphibia	Afrixalus	fornasini	NA	SILVER-BAND BANANA	FROG	BOD	1	NO	0	ZA	GB	S	W	C	C	2000-04-05	2000	2000-04-05	2000	I	NY	AMERICAN MUSEUM OF NATURAL HISTORY	UNIVERSITY OF LEEDS	Original value in 'genus' column: afrilaxus	Afrixalus fornasini	Afrixalus fornasini
2000776591	AFFO	amphibian	Amphibia	Afrixalus	fornasini	NA	SILVER-BAND BANANA	FROG	BOD	1	NO	0	ZM	GB	S	W	C	C	2000-04-05	2000	2000-04-05	2000	I	NY	AMERICAN MUSEUM OF NATURAL HISTORY	UNIVERSITY OF LEEDS	Original value in 'genus' column: afrilaxus	Afrixalus fornasini	Afrixalus fornasini
2000776591	AFFO	amphibian	Amphibia	Afrixalus	fornasini	NA	SILVER-BAND BANANA	FROG	BOD	18	NO	0	LR	GB	S	W	C	C	2000-04-05	2000	2000-04-05	2000	I	NY	AMERICAN MUSEUM OF NATURAL HISTORY	UNIVERSITY OF LEEDS	Original value in 'genus' column: afrilaxus	Afrixalus fornasini	Afrixalus fornasini
2000776591	AFFO	amphibian	Amphibia	Afrixalus	fornasini	NA	SILVER-BAND BANANA	FROG	BOD	2	NO	0	KE	GB	S	W	C	C	2000-04-05	2000	2000-04-05	2000	I	NY	AMERICAN MUSEUM OF NATURAL HISTORY	UNIVERSITY OF LEEDS	Original value in 'genus' column: afrilaxus	Afrixalus fornasini	Afrixalus fornasini
2000776591	AFFO	amphibian	Amphibia	Afrixalus	fornasini	NA	SILVER-BAND BANANA	FROG	BOD	4	NO	0	TZ	GB	S	W	C	C	2000-04-05	2000	2000-04-05	2000	I	NY	AMERICAN MUSEUM OF NATURAL HISTORY	UNIVERSITY OF LEEDS	Original value in 'genus' column: afrilaxus	Afrixalus fornasini	Afrixalus fornasini
2000748216	AGCL	amphibian	Amphibia	Agalychnis	callidryas	NA	RED-EYED TREE	FROG	LIV	250	NO	750	NI	NI	T	W	C	C	2000-04-06	2000	2000-04-06	2000	I	LA	L. A. REPTILE	BIO EXPORT	NA	Agalychnis callidryas	Agalychnis callidryas
2000751701	RACA	amphibian	Amphibia	Rana	catesbeiana	NA	NA	BULLFROG	LIV	2700	NO	970	TW	TW	T	C	C	C	2000-04-07	2000	2000-04-06	2000	I	DF	SPECIALTY PRODUCTS TRADING CO.	ESTATE GALLEN INERNATIONALTRADE	Original value in 'species' column: catesbeinana	Rana catesbeiana	Rana catesbeiana
2000800268	LICA	amphibian	Amphibia	Litoria	caerulea	NA	WHITE'S TREE	FROG	LIV	1000	NO	2850	GB	GB	P	U	C	C	2000-04-06	2000	2000-04-06	2000	I	MI	GAMA SUPPLIERS	NA	NA	Litoria caerulea	Litoria caerulea
2000817744	RACA	amphibian	Amphibia	Rana	catesbeiana	NA	NA	BULLFROG	LIV	1114	KG	1114	EC	EC	T	W	C	C	2000-04-25	2000	2000-04-06	2000	I	NY	KIN YICK TRADING CORPORATION	ASOCIACION DE PRODUCTORES	Original value in 'species' column: catesbeinana	Rana catesbeiana	Rana catesbeiana
2000821315	RACA	amphibian	Amphibia	Rana	catesbeiana	NA	NA	BULLFROG	LIV	1114	NO	1114	EC	EC	T	W	C	C	2000-04-25	2000	2000-04-06	2000	I	NY	KIN YICK TRADING CORPORATION	ASOCIACIAL DE PRODUCTORES	Original value in 'species' column: catesbeinana	Rana catesbeiana	Rana catesbeiana
2000835780	XELA	amphibian	Amphibia	Xenopus	laevis	NA	AFRICAN CLAWED	TOAD	LIV	600	NO	1680	CL	CL	T	U	C	C	2000-04-06	2000	2000-04-06	2000	I	MI	XENOPUS EXPRESS	CARLOS DEL RIO CAMUS	NA	Xenopus laevis	Xenopus laevis
2000843980	RACA	amphibian	Amphibia	Rana	catesbeiana	NA	NA	BULLFROG	LIV	3000	NO	945	TW	TW	T	W	C	C	2000-04-08	2000	2000-04-06	2000	I	NY	HOY LUNG SEAFOOD CORPORATION	HORREI FISHERY CO	Original value in 'species' column: catesbeinana	Rana catesbeiana	Rana catesbeiana
2000900783	KALO	amphibian	Amphibia	Kaloula	pulchra	NA	ASIATIC PAINTED	FROG	LIV	160	NO	48	VN	VN	T	U	C	C	2000-04-06	2000	2000-04-06	2000	I	MI	JP PETS	VIANFOR HANOI	NA	Kaloula pulchra	Kaloula pulchra
2000900783	RLEU	amphibian	Amphibia	Rhacophorus	leucomystax	NA	FLYING	FROG	LIV	200	NO	60	VN	VN	T	U	C	C	2000-04-06	2000	2000-04-06	2000	I	MI	JP PETS	VIANFOR HANOI	NA	Rhacophorus leucomystax	NA
2000257066	AGCL	amphibian	Amphibia	Agalychnis	callidryas	NA	RED-EYED TREE	FROG	LIV	150	NO	263	NI	NI	T	W	C	C	2000-04-07	2000	2000-04-07	2000	I	MI	NA	EXPANSA	NA	Agalychnis callidryas	Agalychnis callidryas
2000743378	RMAC	amphibian	Amphibia	Rana	macrodon	NA	NA	BULLFROG	LEG	19051	KG	76571	VN	VN	T	W	C	C	2000-04-10	2000	2000-04-07	2000	I	BO	INTEROCEAN INC.	CANTHO AGRICULTURAL & ANIMAL	NA	Rana macrodon	NA
2000752426	RACA	amphibian	Amphibia	Rana	catesbeiana	NA	NA	BULLFROG	LIV	1350	NO	389	DO	DO	T	C	C	C	2000-04-11	2000	2000-04-07	2000	I	NW	NORTH SEA TRADING CORPORATION	HECTOR ANT. TORO	Original value in 'species' column: catesbeinana	Rana catesbeiana	Rana catesbeiana
2000794575	RACA	amphibian	Amphibia	Rana	catesbeiana	NA	NA	BULLFROG	SPE	180	NO	138	MX	MX	T	W	C	C	2000-04-07	2000	2000-04-07	2000	I	NG	RANACO CORPORATION	P.A.M.E.E.S.A.	Original value in 'species' column: catesbeinana	Rana catesbeiana	Rana catesbeiana
2000794575	RAFO	amphibian	Amphibia	Rana	forreri	NA	FORRER'S GRASS	FROG	SPE	4090	NO	1260	MX	MX	T	W	C	C	2000-04-07	2000	2000-04-07	2000	I	NG	RANACO CORPORATION	P.A.M.E.E.S.A.	NA	Rana forreri	Rana forreri
2000828921	MAAU	amphibian	Amphibia	Mantella	aurantiaca	NA	MALAGASY GOLDEN	MANTELLA	LIV	500	NO	3000	MG	MG	T	W	C	C	2000-04-20	2000	2000-04-07	2000	I	MI	ALINE RAKOTONIRINA IMPORT- EXPORT	GERMAIN ERNEST IMPORT/EXPORT	NA	Mantella aurantiaca	Mantella aurantiaca
2000828921	MNLA	amphibian	Amphibia	Mantella	laevigata	NA	FOLOHY GOLDEN	MANTELLA	LIV	400	NO	2800	MG	MG	T	U	C	C	2000-04-20	2000	2000-04-07	2000	I	MI	ALINE RAKOTONIRINA IMPORT- EXPORT	GERMAIN ERNEST IMPORT/EXPORT	NA	Mantella laevigata	Mantella laevigata
2000828921	SCGO	amphibian	Amphibia	Scaphiophryne	gottlebei	NA	GOTTLEBE'S MICROHY	FROG	LIV	39	NO	585	MG	MG	T	U	C	C	2000-04-20	2000	2000-04-07	2000	I	MI	ALINE RAKOTONIRINA IMPORT- EXPORT	GERMAIN ERNEST IMPORT/EXPORT	NA	Scaphiophryne gottlebei	Scaphiophryne gottlebei
2000747540	HYMC	amphibian	Amphibia	Hymenochirus	curtipes	NA	W. DWARF CLAWED	FROG	LIV	1200	NO	480	SG	SG	T	W	C	C	2000-04-08	2000	2000-04-08	2000	I	LA	AQUA-NAUTIC SPECIALIST	AQUANAUTICS SPECIALIST PTE LIMITED	NA	Hymenochirus curtipes	Hymenochirus curtipes
2000747988	CYOR	amphibian	Amphibia	Cynops	orientalis	NA	CHINESE DWARF	NEWT	LIV	2000	NO	100	CN	CN	T	W	C	C	2000-04-08	2000	2000-04-08	2000	I	LA	Z IMPORTS INC.	XIAOSHAN IMPORT & EXPORT CO	NA	Cynops orientalis	Cynops orientalis
2000752419	RACA	amphibian	Amphibia	Rana	catesbeiana	NA	NA	BULLFROG	LIV	681	KG	459	DO	DO	T	C	C	C	2000-04-25	2000	2000-04-08	2000	I	NW	TIN TIN FISH TRADING INC.	LIVE FROGS	Original value in 'species' column: catesbeinana	Rana catesbeiana	Rana catesbeiana
2000763774	XELA	amphibian	Amphibia	Xenopus	laevis	NA	AFRICAN CLAWED	TOAD	LIV	1250	NO	188	HK	HK	T	W	C	C	2000-04-12	2000	2000-04-08	2000	I	NY	TRANSSHIP DISCOUNTS LTD.	UNION TROPICAL FISH FARM	NA	Xenopus laevis	Xenopus laevis
2000778096	CYPY	amphibian	Amphibia	Cynops	pyrrhogaster	NA	JAPANESE FIREBELLY	NEWT	LIV	200	NO	36	HK	HK	T	W	C	C	2000-04-10	2000	2000-04-08	2000	I	NY	ERDA INC.	BROTHER AQUARIUM	NA	Cynops pyrrhogaster	Cynops pyrrhogaster
2000778096	HYMC	amphibian	Amphibia	Hymenochirus	curtipes	NA	W. DWARF CLAWED	FROG	LIV	400	NO	80	HK	HK	T	W	C	C	2000-04-10	2000	2000-04-08	2000	I	NY	ERDA INC.	BROTHER AQUARIUM	NA	Hymenochirus curtipes	Hymenochirus curtipes
2000741492	OOLI	amphibian	Amphibia	Occidozyga	lima	NA	PADDY	FROG	LIV	150	NO	14	ID	ID	T	W	C	C	2000-04-12	2000	2000-04-09	2000	I	NY	TRANSSHIP DISCOUNTS LTD.	VIVAJAYA INTERNATIONAL	Original value in 'genus' column: ooedozyga	Occidozyga lima	Occidozyga lima
2000746991	HYMC	amphibian	Amphibia	Hymenochirus	curtipes	NA	W. DWARF CLAWED	FROG	LIV	1600	NO	640	SG	SG	T	W	C	C	2000-04-09	2000	2000-04-09	2000	I	LA	AQUA-NAUTIC SPECIALIST	AQUANAUTICS SPECIALIST PTE LIMITED	NA	Hymenochirus curtipes	Hymenochirus curtipes
2000747377	HYMC	amphibian	Amphibia	Hymenochirus	curtipes	NA	W. DWARF CLAWED	FROG	LIV	250	NO	97	SG	SG	T	W	C	C	2000-11-09	2000	2000-04-09	2000	I	LA	AQUACO, INC.	SUNRISE AQUARIUM PTE LIMITED	NA	Hymenochirus curtipes	Hymenochirus curtipes
2000747418	HYMB	amphibian	Amphibia	Hymenochirus	boettgeri	NA	ZAIRE DWARF CLAWED	FROG	LIV	625	NO	97	HK	HK	T	W	C	C	2000-04-09	2000	2000-04-09	2000	I	LA	TROPICAL ENTERPRISES	CEYLON AQUARIUM	NA	Hymenochirus boettgeri	Hymenochirus boettgeri
2000748426	KALO	amphibian	Amphibia	Kaloula	pulchra	NA	ASIATIC PAINTED	FROG	LIV	510	NO	204	VN	VN	T	W	C	C	2000-04-09	2000	2000-04-09	2000	I	LA	UNIVERSAL AQUATIC	CORIMEX	NA	Kaloula pulchra	Kaloula pulchra
2000748545	HYMC	amphibian	Amphibia	Hymenochirus	curtipes	NA	W. DWARF CLAWED	FROG	LIV	1100	NO	400	SG	SG	T	W	C	C	2000-04-09	2000	2000-04-09	2000	I	LA	AQUA-NAUTIC SPECIALIST	AQUANAUTICS SPECIALIST PTE LTD.	NA	Hymenochirus curtipes	Hymenochirus curtipes
2000749219	OOLI	amphibian	Amphibia	Occidozyga	lima	NA	PADDY	FROG	LIV	300	NO	12	ID	ID	T	W	C	C	2000-04-09	2000	2000-04-09	2000	I	LA	DOLPHIN INTERNATIONAL	VIVAJAYA INTERNATIONAL	Original value in 'genus' column: ooedozyga	Occidozyga lima	Occidozyga lima
2000749222	HYMC	amphibian	Amphibia	Hymenochirus	curtipes	NA	W. DWARF CLAWED	FROG	LIV	450	NO	41	ID	ID	T	W	C	C	2000-04-09	2000	2000-04-09	2000	I	LA	DOLPHIN INTERNATIONAL	PT VIVARIA INDONESIA	NA	Hymenochirus curtipes	Hymenochirus curtipes
2000749222	OOLI	amphibian	Amphibia	Occidozyga	lima	NA	PADDY	FROG	LIV	1200	NO	84	ID	ID	T	W	C	C	2000-04-09	2000	2000-04-09	2000	I	LA	DOLPHIN INTERNATIONAL	PT VIVARIA INDONESIA	Original value in 'genus' column: ooedozyga	Occidozyga lima	Occidozyga lima
2000749256	CYOR	amphibian	Amphibia	Cynops	orientalis	NA	CHINESE DWARF	NEWT	LIV	1850	NO	229	HK	HK	T	W	C	C	2000-04-09	2000	2000-04-09	2000	I	LA	DOLPHIN INTERNATIONAL	SANWOO FISHERIES	NA	Cynops orientalis	Cynops orientalis
2000749256	HYMC	amphibian	Amphibia	Hymenochirus	curtipes	NA	W. DWARF CLAWED	FROG	LIV	4200	NO	462	HK	HK	T	W	C	C	2000-04-09	2000	2000-04-09	2000	I	LA	DOLPHIN INTERNATIONAL	SANWOO FISHERIES	NA	Hymenochirus curtipes	Hymenochirus curtipes
2000749260	CYOR	amphibian	Amphibia	Cynops	orientalis	NA	CHINESE DWARF	NEWT	LIV	6000	NO	572	CN	CN	T	W	C	C	2000-04-09	2000	2000-04-09	2000	I	LA	DOLPHIN INTERNATIONAL	SHANGHAI GOLDEN FIELD GARDENING COMPANY LTD	NA	Cynops orientalis	Cynops orientalis
2000804266	DETI	amphibian	Amphibia	Dendrobates	tinctorius	NA	DYEING	POISON-ARROW FROG	LIV	70	NO	3500	SR	SR	T	W	C	C	2000-04-14	2000	2000-04-09	2000	I	MI	NA	TROPICAL BIRDS AND REPTILES	NA	Dendrobates tinctorius	Dendrobates tinctorius
2000804296	BMAR	amphibian	Amphibia	Bufo	marinus	NA	NEOTROPICAL	TOAD	LIV	6	NO	150	SR	SR	T	W	C	C	2000-04-14	2000	2000-04-09	2000	I	MI	NA	HENZENS TROPICAL WILDLIFE	NA	Bufo marinus	NA
2000804296	DETI	amphibian	Amphibia	Dendrobates	tinctorius	NA	DYEING	POISON-ARROW FROG	LIV	50	NO	1389	SR	SR	T	W	C	C	2000-04-14	2000	2000-04-09	2000	I	MI	NA	HENZENS TROPICAL WILDLIFE	NA	Dendrobates tinctorius	Dendrobates tinctorius
2000804296	DTRV	amphibian	Amphibia	Epipedobates	trivittatus	NA	THREE-STRIPED	POISON-ARROW FROG	LIV	10	NO	350	SR	SR	T	W	C	C	2000-04-14	2000	2000-04-09	2000	I	MI	NA	HENZENS TROPICAL WILDLIFE	NA	Epipedobates trivittatus	Ameerega trivittata
2000804296	PHHP	amphibian	Amphibia	Phyllomedusa	hypocondrialis	NA	ORANGE-LEGGED LEAF	FROG	LIV	150	NO	450	SR	SR	T	W	C	C	2000-04-14	2000	2000-04-09	2000	I	MI	NA	HENZENS TROPICAL WILDLIFE	NA	Phyllomedusa hypocondrialis	NA
2000804296	PPIP	amphibian	Amphibia	Pipa	pipa	NA	SURINAM	TOAD	LIV	2	NO	14	SR	SR	T	W	C	C	2000-04-14	2000	2000-04-09	2000	I	MI	NA	HENZENS TROPICAL WILDLIFE	NA	Pipa pipa	Pipa pipa
2000804399	PHHP	amphibian	Amphibia	Phyllomedusa	hypocondrialis	NA	ORANGE-LEGGED LEAF	FROG	LIV	258	NO	774	SR	SR	T	W	C	C	2000-04-14	2000	2000-04-09	2000	I	MI	GAMA SUPPLIERS, INC.	FANNAS PET SHOP	NA	Phyllomedusa hypocondrialis	NA
2000804399	PPIP	amphibian	Amphibia	Pipa	pipa	NA	SURINAM	TOAD	LIV	8	NO	24	SR	SR	T	W	C	C	2000-04-14	2000	2000-04-09	2000	I	MI	GAMA SUPPLIERS, INC.	FANNAS PET SHOP	NA	Pipa pipa	Pipa pipa
2000804956	PHBC	amphibian	Amphibia	Phyllomedusa	bicolor	NA	GIANT MONKEY	FROG	LIV	36	NO	900	SR	SR	T	W	C	C	2000-04-14	2000	2000-04-09	2000	I	MI	MIAMI REPTILE	NA	NA	Phyllomedusa bicolor	Phyllomedusa bicolor
2000804956	PHHP	amphibian	Amphibia	Phyllomedusa	hypocondrialis	NA	ORANGE-LEGGED LEAF	FROG	LIV	92	NO	276	SR	SR	T	W	C	C	2000-04-14	2000	2000-04-09	2000	I	MI	MIAMI REPTILE	NA	NA	Phyllomedusa hypocondrialis	NA
2000746116	RACA	amphibian	Amphibia	Rana	catesbeiana	NA	NA	BULLFROG	LIV	2400	NO	417	DO	DO	T	C	C	C	2000-04-18	2000	2000-04-10	2000	I	NW	NORTH SEA TRADING CORPORATION	HECTOR ANT TORO	Original value in 'species' column: catesbeinana	Rana catesbeiana	Rana catesbeiana
2000754562	DEAZ	amphibian	Amphibia	Dendrobates	azureus	NA	BLUE	POISON-ARROW FROG	LIV	40	NO	800	DK	DK	T	C	C	C	2000-04-11	2000	2000-04-10	2000	I	SE	WAGNER ERNIE	ELVERS RENE	NA	Dendrobates azureus	NA
2000766602	RACA	amphibian	Amphibia	Rana	catesbeiana	NA	NA	BULLFROG	LIV	318	NO	360	MX	MX	T	W	C	C	2000-04-10	2000	2000-04-10	2000	I	MP	BIO CORPORATION	ANTURO BELTRON	Original value in 'species' column: catesbeinana	Rana catesbeiana	Rana catesbeiana
2000766602	RAPI	amphibian	Amphibia	Rana	pipiens	NA	NORTHERN LEOPARD	FROG	LIV	854	NO	450	MX	MX	T	W	C	C	2000-04-10	2000	2000-04-10	2000	I	MP	BIO CORPORATION	ANTURO BELTRON	NA	Rana pipiens	Rana pipiens
2000746669	RACA	amphibian	Amphibia	Rana	catesbeiana	NA	NA	BULLFROG	LIV	40000	NO	45904	TW	TW	T	W	C	C	2000-04-07	2000	2000-04-11	2000	I	SF	NOR-CAL SEAFOOD INC.	PENSE SEAFOODS CO LIMITED	Original value in 'species' column: catesbeinana	Rana catesbeiana	Rana catesbeiana
2000746983	CYOR	amphibian	Amphibia	Cynops	orientalis	NA	CHINESE DWARF	NEWT	LIV	12000	NO	360	CN	CN	T	W	C	C	2000-04-11	2000	2000-04-11	2000	I	LA	AQUA-NAUTIC SPECIALIST	SHANGHAI ESWELL ENTERPRISE CO. LIMITED	NA	Cynops orientalis	Cynops orientalis
2000747180	HYMC	amphibian	Amphibia	Hymenochirus	curtipes	NA	W. DWARF CLAWED	FROG	LIV	300	NO	90	NG	NG	T	W	C	C	2000-04-11	2000	2000-04-11	2000	I	LA	AQUA-NAUTIC SPECIALIST	MCBOO AQUARIUM SUPPLY LTD	NA	Hymenochirus curtipes	Hymenochirus curtipes
2000752422	RACA	amphibian	Amphibia	Rana	catesbeiana	NA	NA	BULLFROG	LIV	1018	KG	1018	EC	EC	T	C	C	C	2000-04-25	2000	2000-04-11	2000	I	NW	KIN YICK TRADING CORPORATION	VIVICOCE Y CIA	Original value in 'species' column: catesbeinana	Rana catesbeiana	Rana catesbeiana
2000783287	AGCL	amphibian	Amphibia	Agalychnis	callidryas	NA	RED-EYED TREE	FROG	LIV	100	NO	700	NI	NI	T	C	C	C	2000-04-11	2000	2000-04-11	2000	I	MI	EMERALD CORAL & REPTILE	ZOCRIADERO NICARAGUENSE	NA	Agalychnis callidryas	Agalychnis callidryas
2000783909	AGCL	amphibian	Amphibia	Agalychnis	callidryas	NA	RED-EYED TREE	FROG	LIV	42	NO	420	HN	HN	T	W	C	C	2000-04-11	2000	2000-04-11	2000	I	MI	MIAMI REPTILE	BREDDING FARMS CORPORATION	NA	Agalychnis callidryas	Agalychnis callidryas
2000747832	BUME	amphibian	Amphibia	Bufo	melanostictus	NA	BLACK-SPINED	TOAD	LIV	130	NO	292	TH	TH	T	W	C	C	2000-04-12	2000	2000-04-12	2000	I	LA	PETS INTERNATIONAL	ASIA WORLD WIDE	NA	Bufo melanostictus	Duttaphrynus melanostictus
2000747832	KALO	amphibian	Amphibia	Kaloula	pulchra	NA	ASIATIC PAINTED	FROG	LIV	688	NO	232	TH	TH	T	W	C	C	2000-04-12	2000	2000-04-12	2000	I	LA	PETS INTERNATIONAL	ASIA WORLD WIDE	NA	Kaloula pulchra	Kaloula pulchra
2000747832	RLEU	amphibian	Amphibia	Rhacophorus	leucomystax	NA	FLYING	FROG	LIV	375	NO	337	TH	TH	T	W	C	C	2000-04-12	2000	2000-04-12	2000	I	LA	PETS INTERNATIONAL	ASIA WORLD WIDE	NA	Rhacophorus leucomystax	NA
2000751326	CEGU	amphibian	Amphibia	Ceratobatrachus	guentheri	NA	GUNTHER'S TRIANGLE	FROG	LIV	6	NO	60	CA	CA	non-standard value	C	C	C	2000-04-12	2000	2000-04-12	2000	I	CH	RED RIVER ZOO	TORONTO ZOO	Original value in 'purpose' column: N	Ceratobatrachus guentheri	NA
2000769926	HEMM	amphibian	Amphibia	Hemisus	marmoratus	NA	MARBLED SHOVELNOSE	FROG	LIV	50	NO	75	TZ	TZ	T	W	C	C	2000-04-12	2000	2000-04-12	2000	I	LA	INTERNATIONAL DRAGON BREEDERS INC	KISASE INVESTMENT	NA	Hemisus marmoratus	Hemisus marmoratus
2000770960	BRMO	amphibian	Amphibia	Breviceps	mossambiscus	NA	MZ SHORT-HEADED	FROG	LIV	300	NO	150	TZ	TZ	T	W	C	C	2000-04-12	2000	2000-04-12	2000	I	LA	CALIFORNIA ZOOLOGICAL SUPPLY	CANDIDA ENTERPRISES	NA	Breviceps mossambiscus	NA
2000816884	PBIF	amphibian	Amphibia	Phrynomantis	bifasciatus	NA	S AFR SNAKE-NECK	FROG	LIV	150	NO	60	GH	GH	T	W	C	C	2000-04-12	2000	2000-04-12	2000	I	NY	EAST COAST ZOOLOGICAL SUPPLY	PRESTIGE COMMERCIAL HOUSE	NA	Phrynomantis bifasciatus	Phrynomantis bifasciatus
2000747018	MAAU	amphibian	Amphibia	Mantella	aurantiaca	NA	MALAGASY GOLDEN	MANTELLA	LIV	50	NO	150	MG	MG	T	W	C	C	2000-04-13	2000	2000-04-13	2000	I	LA	GLOBAL TROPICAL	FAUNA EXPORT	NA	Mantella aurantiaca	Mantella aurantiaca
2000749907	DYIN	amphibian	Amphibia	Dyscophus	insularis	NA	ANTSOUHY TOMATO	FROG	LIV	50	NO	350	MG	MG	T	W	C	C	2000-04-13	2000	2000-04-13	2000	I	LA	L. A. REPTILE	RAJAOFFERSONS PETFARM	NA	Dyscophus insularis	Dyscophus insularis
2000749907	MAAU	amphibian	Amphibia	Mantella	aurantiaca	NA	MALAGASY GOLDEN	MANTELLA	LIV	100	NO	500	MG	MG	T	W	C	C	2000-04-13	2000	2000-04-13	2000	I	LA	L. A. REPTILE	RAJAOFFERSONS PETFARM	NA	Mantella aurantiaca	Mantella aurantiaca
2000751795	CYPY	amphibian	Amphibia	Cynops	pyrrhogaster	NA	JAPANESE FIREBELLY	NEWT	LIV	49	NO	0	JP	JP	non-standard value	W	C	C	2000-04-13	2000	2000-04-13	2000	I	DF	NA	NA	Original value in 'purpose' column: N	Cynops pyrrhogaster	Cynops pyrrhogaster
2000788931	RACA	amphibian	Amphibia	Rana	catesbeiana	NA	NA	BULLFROG	LIV	5000	NO	496	DO	DO	T	C	C	C	2000-08-29	2000	2000-04-13	2000	I	NW	TIN TIN FISH TRADING INC.	LIVE FROGS DOM S.A.	Original value in 'species' column: catesbeinana	Rana catesbeiana	Rana catesbeiana
2000747068	PBIF	amphibian	Amphibia	Phrynomantis	bifasciatus	NA	S AFR SNAKE-NECK	FROG	LIV	200	NO	300	TG	TG	T	W	C	C	2000-04-14	2000	2000-04-14	2000	I	LA	L. A. REPTILE	PAJAR S.A.R.L.	NA	Phrynomantis bifasciatus	Phrynomantis bifasciatus
2000753777	RACA	amphibian	Amphibia	Rana	catesbeiana	NA	NA	BULLFROG	LIV	1150	NO	326	DO	DO	T	C	C	C	2000-04-20	2000	2000-04-14	2000	I	NW	NORTH SEA TRADING CORPORATION	HECTOR ANT TORO	Original value in 'species' column: catesbeinana	Rana catesbeiana	Rana catesbeiana
2000741410	HYMC	amphibian	Amphibia	Hymenochirus	curtipes	NA	W. DWARF CLAWED	FROG	LIV	1500	NO	315	HK	HK	T	W	C	C	2000-04-17	2000	2000-04-15	2000	I	NY	ERDA INC.	BROTHER AQUARIUM	NA	Hymenochirus curtipes	Hymenochirus curtipes
2000744698	RACA	amphibian	Amphibia	Rana	catesbeiana	NA	NA	BULLFROG	LIV	3000	NO	945	TW	TW	T	W	C	C	2000-03-22	2000	2000-04-15	2000	I	NY	HOY LUNG CO	HORREI FISHERY CO	Original value in 'species' column: catesbeinana	Rana catesbeiana	Rana catesbeiana
2000747533	HYMC	amphibian	Amphibia	Hymenochirus	curtipes	NA	W. DWARF CLAWED	FROG	LIV	1600	NO	640	SG	SG	T	W	C	C	2000-04-15	2000	2000-04-15	2000	I	LA	AQUA-NAUTIC SPECIALIST	AQUANAUTICS SPECIALIST PTE LIMITED	NA	Hymenochirus curtipes	Hymenochirus curtipes
2000749491	XELA	amphibian	Amphibia	Xenopus	laevis	NA	AFRICAN CLAWED	TOAD	LIV	1875	NO	281	HK	HK	T	W	C	C	2000-04-18	2000	2000-04-15	2000	I	NY	TRANSSHIP DISCOUNTS LTD.	UNION TROPICAL FISH FARM	NA	Xenopus laevis	Xenopus laevis
2000747002	HYMC	amphibian	Amphibia	Hymenochirus	curtipes	NA	W. DWARF CLAWED	FROG	LIV	200	NO	80	SG	SG	T	W	C	C	2000-04-16	2000	2000-04-16	2000	I	LA	AQUACO, INC.	SUNSHINE AQUARIU PTE LTD	NA	Hymenochirus curtipes	Hymenochirus curtipes
2000747042	HYMC	amphibian	Amphibia	Hymenochirus	curtipes	NA	W. DWARF CLAWED	FROG	LIV	1600	NO	369	HK	HK	T	W	C	C	2000-04-16	2000	2000-04-16	2000	I	LA	AQUACO, INC.	DRAGON FISHERIES	NA	Hymenochirus curtipes	Hymenochirus curtipes
2000747654	HYMC	amphibian	Amphibia	Hymenochirus	curtipes	NA	W. DWARF CLAWED	FROG	LIV	500	NO	600	SG	SG	T	W	C	C	2000-04-16	2000	2000-04-16	2000	I	LA	AQUA-NAUTIC SPECIALIST	AQUANAUTICS SPECIALIST PTE LIMITED	NA	Hymenochirus curtipes	Hymenochirus curtipes
2000752441	RACA	amphibian	Amphibia	Rana	catesbeiana	NA	NA	BULLFROG	LIV	919	KG	759	EC	EC	T	C	C	C	2000-04-25	2000	2000-04-16	2000	I	NW	KIN YICK TRADING CORP.	ASSOCIACION DE PRODUCTORES	Original value in 'species' column: catesbeinana	Rana catesbeiana	Rana catesbeiana
2000759591	PACB	amphibian	Amphibia	Pachytriton	brevipes	NA	TSITOU	NEWT	LIV	100	NO	100	CN	CA	T	C	C	C	2000-04-15	2000	2000-04-16	2000	I	LA	DOLPHIN INTERNATIONAL	AQUA LIFE INTERNATIONAL	NA	Pachytriton brevipes	Pachytriton brevipes
2000761834	LICA	amphibian	Amphibia	Litoria	caerulea	NA	WHITE'S TREE	FROG	LIV	25	NO	20	ID	ID	T	W	C	C	2000-04-16	2000	2000-04-16	2000	I	LA	DOLPHIN INTERNATIONAL	VIVAJAYA INTERNATIONAL	NA	Litoria caerulea	Litoria caerulea
2000761834	OOLI	amphibian	Amphibia	Occidozyga	lima	NA	PADDY	FROG	LIV	1050	NO	42	ID	ID	T	W	C	C	2000-04-16	2000	2000-04-16	2000	I	LA	DOLPHIN INTERNATIONAL	VIVAJAYA INTERNATIONAL	Original value in 'genus' column: ooedozyga	Occidozyga lima	Occidozyga lima
2000761839	HYMC	amphibian	Amphibia	Hymenochirus	curtipes	NA	W. DWARF CLAWED	FROG	LIV	450	NO	39	ID	ID	T	W	C	C	2000-04-16	2000	2000-04-16	2000	I	LA	DOLPHIN INTERNATIONAL	VIVARIA INDONESIA P.T.	NA	Hymenochirus curtipes	Hymenochirus curtipes
2000761839	OOLI	amphibian	Amphibia	Occidozyga	lima	NA	PADDY	FROG	LIV	450	NO	32	ID	ID	T	W	C	C	2000-04-16	2000	2000-04-16	2000	I	LA	DOLPHIN INTERNATIONAL	VIVARIA INDONESIA P.T.	Original value in 'genus' column: ooedozyga	Occidozyga lima	Occidozyga lima
2000761869	CYOR	amphibian	Amphibia	Cynops	orientalis	NA	CHINESE DWARF	NEWT	LIV	940	NO	123	HK	HK	T	W	C	C	2000-04-16	2000	2000-04-16	2000	I	LA	DOLPHIN INTERNATIONAL	SANWOO FISHERIES	NA	Cynops orientalis	Cynops orientalis
2000761869	HYMC	amphibian	Amphibia	Hymenochirus	curtipes	NA	W. DWARF CLAWED	FROG	LIV	36807	NO	3163	HK	HK	T	W	C	C	2000-04-16	2000	2000-04-16	2000	I	LA	DOLPHIN INTERNATIONAL	SANWOO FISHERIES	NA	Hymenochirus curtipes	Hymenochirus curtipes
2000761869	HYMC	amphibian	Amphibia	Hymenochirus	curtipes	NA	W. DWARF CLAWED	FROG	LIV	2800	NO	336	HK	HK	T	W	C	C	2000-04-16	2000	2000-04-16	2000	I	LA	DOLPHIN INTERNATIONAL	SANWOO FISHERIES	NA	Hymenochirus curtipes	Hymenochirus curtipes
2000789212	RACA	amphibian	Amphibia	Rana	catesbeiana	NA	NA	BULLFROG	LIV	5000	NO	324	DO	DO	T	C	C	C	2000-08-30	2000	2000-04-16	2000	I	NW	TIN TIN FISH TRADING INC.	LIVE FROGS DOM S.A.	Original value in 'species' column: catesbeinana	Rana catesbeiana	Rana catesbeiana
2000746165	RMAC	amphibian	Amphibia	Rana	macrodon	NA	NA	BULLFROG	LEG	8845	KG	32654	ID	ID	T	W	C	C	2000-04-17	2000	2000-04-17	2000	I	NW	ROBERT W. CHAN INC.	PT SUMBERLAUT BENGINDO	NA	Rana macrodon	NA
2000747051	HEMM	amphibian	Amphibia	Hemisus	marmoratus	NA	MARBLED SHOVELNOSE	FROG	LIV	150	NO	75	TZ	TZ	T	W	C	C	2000-04-17	2000	2000-04-17	2000	I	LA	L. A. REPTILE	KISASE INVESTMENT	NA	Hemisus marmoratus	Hemisus marmoratus
2000747051	PBIF	amphibian	Amphibia	Phrynomantis	bifasciatus	NA	S AFR SNAKE-NECK	FROG	LIV	400	NO	200	TZ	TZ	T	W	C	C	2000-04-17	2000	2000-04-17	2000	I	LA	L. A. REPTILE	KISASE INVESTMENT	NA	Phrynomantis bifasciatus	Phrynomantis bifasciatus
2000748363	BUME	amphibian	Amphibia	Bufo	melanostictus	NA	BLACK-SPINED	TOAD	LIV	100	NO	100	ID	ID	NA	W	C	C	2000-04-18	2000	2000-04-17	2000	I	LA	CALIFORNIA ZOOLOGICAL SUPPLY	CV LEO JAYA	NA	Bufo melanostictus	Duttaphrynus melanostictus
2000748363	RHRE	amphibian	Amphibia	Rhacophorus	reinwardtii	NA	REINWARDT'S FLYING	FROG	LIV	20	NO	20	ID	ID	NA	W	C	C	2000-04-18	2000	2000-04-17	2000	I	LA	CALIFORNIA ZOOLOGICAL SUPPLY	CV LEO JAYA	NA	Rhacophorus reinwardtii	Rhacophorus reinwardtii
2000772910	LICA	amphibian	Amphibia	Litoria	caerulea	NA	WHITE'S TREE	FROG	LIV	100	NO	291	ID	ID	T	W	C	C	2000-07-14	2000	2000-04-17	2000	I	LA	TEPEDELEN, KAMURAN	CV. TERRARIA INDONESIA	NA	Litoria caerulea	Litoria caerulea
2000772910	LICA	amphibian	Amphibia	Litoria	caerulea	NA	WHITE'S TREE	FROG	LIV	125	NO	300	ID	ID	T	W	C	C	2000-07-14	2000	2000-04-17	2000	I	LA	TEPEDELEN, KAMURAN	CV. TERRARIA INDONESIA	NA	Litoria caerulea	Litoria caerulea
2000782437	BUVI	amphibian	Amphibia	Bufo	viridis	NA	EUROPEAN GREEN	TOAD	LIV	605	NO	453	EG	EG	T	U	C	C	2000-04-17	2000	2000-04-17	2000	I	MI	EXOTIC REPTILES JUNGLE	TOP TRADERS	NA	Bufo viridis	NA
2000754101	RACA	amphibian	Amphibia	Rana	catesbeiana	NA	NA	BULLFROG	LIV	479	KG	264	DO	DO	T	W	C	C	2000-04-26	2000	2000-04-18	2000	I	NW	TIN TIN FISH TRADING INC.	LIVE FROGS DOM SA	Original value in 'species' column: catesbeinana	Rana catesbeiana	Rana catesbeiana
2000793114	RACA	amphibian	Amphibia	Rana	catesbeiana	NA	NA	BULLFROG	LIV	1005	KG	1005	EC	EC	T	C	C	C	2000-04-18	2000	2000-04-18	2000	I	NW	KIN YICK TRADING CORPORATION	ASSOCIACION DE PRODUCTORES DE RANAS	Original value in 'species' column: catesbeinana	Rana catesbeiana	Rana catesbeiana
2000794588	BMAR	amphibian	Amphibia	Bufo	marinus	NA	NEOTROPICAL	TOAD	SPE	20	NO	10	MX	MX	T	W	C	C	2000-04-18	2000	2000-04-18	2000	I	NG	RANACO CORPORATION	P.A.M.E.E.S.A.	NA	Bufo marinus	NA
2000794588	RACA	amphibian	Amphibia	Rana	catesbeiana	NA	NA	BULLFROG	SPE	345	NO	330	MX	MX	T	W	C	C	2000-04-18	2000	2000-04-18	2000	I	NG	RANACO CORPORATION	P.A.M.E.E.S.A.	Original value in 'species' column: catesbeinana	Rana catesbeiana	Rana catesbeiana
2000794588	RAFO	amphibian	Amphibia	Rana	forreri	NA	FORRER'S GRASS	FROG	SPE	12119	NO	4590	MX	MX	T	W	C	C	2000-04-18	2000	2000-04-18	2000	I	NG	RANACO CORPORATION	P.A.M.E.E.S.A.	NA	Rana forreri	Rana forreri
2000794718	RABE	amphibian	Amphibia	Rana	berlandieri	NA	RIO GRANDE	FROG	LIV	150	KG	968	MX	MX	T	W	C	C	2000-04-18	2000	2000-04-18	2000	I	BV	RANA LABORATORIES	MONTALVO ALVARO GARZA	NA	Rana berlandieri	Rana berlandieri
2000726705	CYOR	amphibian	Amphibia	Cynops	orientalis	NA	CHINESE DWARF	NEWT	LIV	200	NO	10	CN	CN	T	W	C	C	2000-04-26	2000	2000-04-19	2000	I	NY	MIN HUA ENTERPRISE INC	SHANGHAI ESWELL ENTERPRISE CO	NA	Cynops orientalis	Cynops orientalis
2000751986	ANCT	amphibian	Amphibia	NA	NA	NA	NON-CITES	AMPHIBIANS	SPE	46	NO	0	CN	FR	non-standard value	U	C	C	2000-04-21	2000	2000-04-19	2000	I	NY	AMERICAN MUSEUM OF NATURAL HISTORY DEPARTMENT OF H	MUSEUM NATIONAL D'HISTOIRE NATUREL LABORATOIRE DES	Original value in 'purpose' column: N	Na na	NA
2000754099	RACA	amphibian	Amphibia	Rana	catesbeiana	NA	NA	BULLFROG	LIV	299	KG	300	DO	DO	T	W	C	C	2000-04-26	2000	2000-04-19	2000	I	NW	TIN TIN FISH TRADING INC.	LIVE FROGS DOM SA	Original value in 'species' column: catesbeinana	Rana catesbeiana	Rana catesbeiana
2000756021	NMAC	amphibian	Amphibia	Necturus	maculosus	NA	NA	MUDPUPPY	LIV	2000	NO	2000	CA	CA	T	C	C	C	2000-04-26	2000	2000-04-19	2000	I	BN	WARD'S NATURAL SCIENCE,EST	NA	NA	Necturus maculosus	Necturus maculosus
2000760248	KALO	amphibian	Amphibia	Kaloula	pulchra	NA	ASIATIC PAINTED	FROG	LIV	200	NO	60	VN	VN	T	W	C	C	2000-04-19	2000	2000-04-19	2000	I	LA	CALIFORNIA ZOOLOGICAL SUPPLY	CONFICO	NA	Kaloula pulchra	Kaloula pulchra
2000760248	RLEU	amphibian	Amphibia	Rhacophorus	leucomystax	NA	FLYING	FROG	LIV	300	NO	90	VN	VN	T	W	C	C	2000-04-19	2000	2000-04-19	2000	I	LA	CALIFORNIA ZOOLOGICAL SUPPLY	CONFICO	NA	Rhacophorus leucomystax	NA
2000789209	RACA	amphibian	Amphibia	Rana	catesbeiana	NA	NA	BULLFROG	LIV	1008	NO	294	DO	DO	T	C	C	C	2000-08-30	2000	2000-04-19	2000	I	NW	NORTH SEA TRADING CORPORATION	HECTOR ANT TORO	Original value in 'species' column: catesbeinana	Rana catesbeiana	Rana catesbeiana
2000799563	DETI	amphibian	Amphibia	Dendrobates	tinctorius	NA	DYEING	POISON-ARROW FROG	LIV	2	NO	0	SR	CA	T	W	C	C	2000-04-19	2000	2000-04-19	2000	I	MI	MOMMSEN, BRIAN ROGER	MIRDO IMPORTATIONS	NA	Dendrobates tinctorius	Dendrobates tinctorius
2000746712	DYIN	amphibian	Amphibia	Dyscophus	insularis	NA	ANTSOUHY TOMATO	FROG	LIV	200	NO	800	MG	MG	T	W	C	C	2000-04-21	2000	2000-04-20	2000	I	LA	CALIFORNIA ZOOLOGICAL SUPPLY	SOPRACO	NA	Dyscophus insularis	Dyscophus insularis
2000746712	MAAU	amphibian	Amphibia	Mantella	aurantiaca	NA	MALAGASY GOLDEN	MANTELLA	LIV	200	NO	500	MG	MG	T	W	C	C	2000-04-21	2000	2000-04-20	2000	I	LA	CALIFORNIA ZOOLOGICAL SUPPLY	SOPRACO	NA	Mantella aurantiaca	Mantella aurantiaca
2000750436	RACA	amphibian	Amphibia	Rana	catesbeiana	NA	NA	BULLFROG	LEG	17281	KG	41910	CN	CN	T	C	C	C	2000-04-25	2000	2000-04-20	2000	I	LA	OCEAN KING INTERNATIONAL INC.	XIZMEN NOONSUN INDUSTRIES CO LIMITED	Original value in 'species' column: catesbeinana	Rana catesbeiana	Rana catesbeiana
2000821408	RACA	amphibian	Amphibia	Rana	catesbeiana	NA	NA	BULLFROG	LPL	2	NO	1210	ID	IT	T	W	C	C	2000-04-25	2000	2000-04-20	2000	I	NY	DG USA INC.	FONTANA PELLETTERIE SPA	Original value in 'species' column: catesbeinana	Rana catesbeiana	Rana catesbeiana
2000745885	RACA	amphibian	Amphibia	Rana	catesbeiana	NA	NA	BULLFROG	LIV	1000	KG	34564	TW	TW	T	W	C	C	2000-04-21	2000	2000-04-21	2000	I	SF	NOR-CAL SEAFOOD INC.	PENSETO SEAFOOD CO LIMITED	Original value in 'species' column: catesbeinana	Rana catesbeiana	Rana catesbeiana
2000750224	BOOR	amphibian	Amphibia	Bombina	orientalis	NA	ORIENTAL FIREBELLY	TOAD	LIV	25000	NO	12500	KR	KR	T	W	C	C	2000-04-21	2000	2000-04-21	2000	I	LA	GEO INTERNATIONAL	INTERPET KOREA	NA	Bombina orientalis	Bombina orientalis
2000754097	RACA	amphibian	Amphibia	Rana	catesbeiana	NA	NA	BULLFROG	LIV	544	KG	300	DO	DO	T	W	C	C	2000-04-26	2000	2000-04-21	2000	I	NW	TIN TIN FISH TRADING INC.	LIVE FROGS DOM SA	Original value in 'species' column: catesbeinana	Rana catesbeiana	Rana catesbeiana
2000768219	HYMB	amphibian	Amphibia	Hymenochirus	boettgeri	NA	ZAIRE DWARF CLAWED	FROG	LIV	1000	NO	50	HK	HK	T	W	C	C	2000-04-20	2000	2000-04-21	2000	I	AT	FINN'S AQUATICS INC.	FORTUNE WIDE ASIA	NA	Hymenochirus boettgeri	Hymenochirus boettgeri
2000785044	RACA	amphibian	Amphibia	Rana	catesbeiana	NA	NA	BULLFROG	LIV	3000	NO	945	TW	TW	T	W	C	C	2000-04-21	2000	2000-04-21	2000	I	NY	HOY LUNG SEAFOOD CORPORATION	HORREI FISHERY CO.	Original value in 'species' column: catesbeinana	Rana catesbeiana	Rana catesbeiana
2000746784	RMAC	amphibian	Amphibia	Rana	macrodon	NA	NA	BULLFROG	LPL	6	NO	2940	SG	IT	T	W	C	C	2000-04-26	2000	2000-04-22	2000	I	LA	G.V. DISTRIBUTION LLC	DIVER SRL	NA	Rana macrodon	NA
2000749745	BOOR	amphibian	Amphibia	Bombina	orientalis	NA	ORIENTAL FIREBELLY	TOAD	LIV	13000	NO	7800	KR	KR	T	W	C	C	2000-04-22	2000	2000-04-22	2000	I	LA	PET-SIAM INTERNATIONAL	YICHO SANGSA	NA	Bombina orientalis	Bombina orientalis
2000750056	CYOR	amphibian	Amphibia	Cynops	orientalis	NA	CHINESE DWARF	NEWT	LIV	1500	NO	75	CN	CN	T	W	C	C	2000-04-22	2000	2000-04-22	2000	I	LA	Z IMPORTS INC.	XIAOSHAN IMPORT & EXPORT COMPANY	NA	Cynops orientalis	Cynops orientalis
2000750617	XELA	amphibian	Amphibia	Xenopus	laevis	NA	AFRICAN CLAWED	TOAD	LIV	1500	NO	225	HK	HK	T	W	C	C	2000-04-24	2000	2000-04-22	2000	I	NY	TRANSSHIP DISCOUNTS LTD.	UNION KTROPICALFISH FARM	NA	Xenopus laevis	Xenopus laevis
2000819495	CYOR	amphibian	Amphibia	Cynops	orientalis	NA	CHINESE DWARF	NEWT	LIV	500	NO	216	HK	DK	T	W	C	C	2000-04-24	2000	2000-04-22	2000	I	NY	ERDA INC.	BROTHER AQUARIUM	NA	Cynops orientalis	Cynops orientalis
2000819495	HYMC	amphibian	Amphibia	Hymenochirus	curtipes	NA	W. DWARF CLAWED	FROG	LIV	1100	NO	212	HK	DK	T	W	C	C	2000-04-24	2000	2000-04-22	2000	I	NY	ERDA INC.	BROTHER AQUARIUM	NA	Hymenochirus curtipes	Hymenochirus curtipes
2000830190	PHBC	amphibian	Amphibia	Phyllomedusa	bicolor	NA	GIANT MONKEY	FROG	LIV	30	NO	600	SR	SR	T	U	C	C	2000-05-04	2000	2000-04-22	2000	I	MI	NA	HENZENS TROPICAL WILDLIFE	NA	Phyllomedusa bicolor	Phyllomedusa bicolor
2000830403	PPIP	amphibian	Amphibia	Pipa	pipa	NA	SURINAM	TOAD	LIV	3	NO	9	SR	SR	T	W	C	C	2000-05-12	2000	2000-04-22	2000	I	MI	GAMA SUPPLIERS, INC.	FANNAS PET SHOP	NA	Pipa pipa	Pipa pipa
2000747821	HYMC	amphibian	Amphibia	Hymenochirus	curtipes	NA	W. DWARF CLAWED	FROG	LIV	2400	NO	553	HK	HK	T	W	C	C	2000-04-23	2000	2000-04-23	2000	I	LA	AQUACO, INC.	DRAGON FISHERIES	NA	Hymenochirus curtipes	Hymenochirus curtipes
2000749596	BUME	amphibian	Amphibia	Bufo	melanostictus	NA	BLACK-SPINED	TOAD	LIV	107	NO	43	VN	VN	T	W	C	C	2000-04-23	2000	2000-04-23	2000	I	LA	UNIVERSAL AQUATIC	CORIMEX	NA	Bufo melanostictus	Duttaphrynus melanostictus
2000749596	KALO	amphibian	Amphibia	Kaloula	pulchra	NA	ASIATIC PAINTED	FROG	LIV	130	NO	52	VN	VN	T	W	C	C	2000-04-23	2000	2000-04-23	2000	I	LA	UNIVERSAL AQUATIC	CORIMEX	NA	Kaloula pulchra	Kaloula pulchra
2000749596	RLEU	amphibian	Amphibia	Rhacophorus	leucomystax	NA	FLYING	FROG	LIV	95	NO	38	VN	VN	T	W	C	C	2000-04-23	2000	2000-04-23	2000	I	LA	UNIVERSAL AQUATIC	CORIMEX	NA	Rhacophorus leucomystax	NA
2000750017	HYMC	amphibian	Amphibia	Hymenochirus	curtipes	NA	W. DWARF CLAWED	FROG	LIV	1100	NO	440	SG	SG	T	W	C	C	2000-04-23	2000	2000-04-23	2000	I	LA	AQUA-NAUTIC SPECIALIST	AQUANAUTICS SPECIALIST PTE LIMITED	NA	Hymenochirus curtipes	Hymenochirus curtipes
2000752432	RACA	amphibian	Amphibia	Rana	catesbeiana	NA	NA	BULLFROG	LIV	480	KG	301	DO	DO	T	C	C	C	2000-04-25	2000	2000-04-23	2000	I	NW	TIN TIN FISH TRADING INC.	LIVE FROGS	Original value in 'species' column: catesbeinana	Rana catesbeiana	Rana catesbeiana
2000758310	CYOR	amphibian	Amphibia	Cynops	orientalis	NA	CHINESE DWARF	NEWT	LIV	450	NO	117	HK	HK	T	W	C	C	2000-04-23	2000	2000-04-23	2000	I	LA	DOLPHIN INTERNATIONAL	SANWOO FISHERIES	NA	Cynops orientalis	Cynops orientalis
2000758310	HYMC	amphibian	Amphibia	Hymenochirus	curtipes	NA	W. DWARF CLAWED	FROG	LIV	3640	NO	437	HK	HK	T	W	C	C	2000-04-23	2000	2000-04-23	2000	I	LA	DOLPHIN INTERNATIONAL	SANWOO FISHERIES	NA	Hymenochirus curtipes	Hymenochirus curtipes
2000758317	CYOR	amphibian	Amphibia	Cynops	orientalis	NA	CHINESE DWARF	NEWT	LIV	7500	NO	714	CN	CN	T	W	C	C	2000-04-23	2000	2000-04-23	2000	I	LA	DOLPHIN INTERNATIONAL	SHANGHAI GOLDEN FIELD GARDENING COMPANY, LTD	NA	Cynops orientalis	Cynops orientalis
2000758321	HYMC	amphibian	Amphibia	Hymenochirus	curtipes	NA	W. DWARF CLAWED	FROG	LIV	600	NO	42	ID	ID	T	W	C	C	2000-04-23	2000	2000-04-23	2000	I	LA	DOLPHIN INTERNATIONAL	P.T. VIVARIA INDONESIA	NA	Hymenochirus curtipes	Hymenochirus curtipes
2000758321	LICA	amphibian	Amphibia	Litoria	caerulea	NA	WHITE'S TREE	FROG	LIV	320	NO	440	ID	ID	T	W	C	C	2000-04-23	2000	2000-04-23	2000	I	LA	DOLPHIN INTERNATIONAL	P.T. VIVARIA INDONESIA	NA	Litoria caerulea	Litoria caerulea
2000758321	OOLI	amphibian	Amphibia	Occidozyga	lima	NA	PADDY	FROG	LIV	750	NO	53	ID	ID	T	W	C	C	2000-04-23	2000	2000-04-23	2000	I	LA	DOLPHIN INTERNATIONAL	P.T. VIVARIA INDONESIA	Original value in 'genus' column: ooedozyga	Occidozyga lima	Occidozyga lima
2000758326	LICA	amphibian	Amphibia	Litoria	caerulea	NA	WHITE'S TREE	FROG	LIV	50	NO	40	ID	ID	T	W	C	C	2000-04-23	2000	2000-04-23	2000	I	LA	DOLPHIN INTERNATIONAL	VIVAJAYA INTERNATIONAL	NA	Litoria caerulea	Litoria caerulea
2000758326	OOLI	amphibian	Amphibia	Occidozyga	lima	NA	PADDY	FROG	LIV	150	NO	6	ID	ID	T	W	C	C	2000-04-23	2000	2000-04-23	2000	I	LA	DOLPHIN INTERNATIONAL	VIVAJAYA INTERNATIONAL	Original value in 'genus' column: ooedozyga	Occidozyga lima	Occidozyga lima
2000759896	HYMC	amphibian	Amphibia	Hymenochirus	curtipes	NA	W. DWARF CLAWED	FROG	LIV	1600	NO	640	SG	SG	T	C	C	C	2000-04-23	2000	2000-04-23	2000	I	LA	AQUA-NAUTIC SPECIALIST	AQUANAUTICS SPECIALIST PTE LIMITED	NA	Hymenochirus curtipes	Hymenochirus curtipes
2000760201	CYOR	amphibian	Amphibia	Cynops	orientalis	NA	CHINESE DWARF	NEWT	LIV	25	NO	30	SG	SG	T	C	C	C	2000-04-23	2000	2000-04-23	2000	I	LA	PET-SIAM INTERNATIONAL	OLYMPIA AQUARIUM	NA	Cynops orientalis	Cynops orientalis
2000746657	ANCT	amphibian	Amphibia	NA	NA	NA	NON-CITES	AMPHIBIANS	LIV	140	NO	280	GH	GH	T	W	C	C	2000-04-24	2000	2000-04-24	2000	I	LA	CALIFORNIA ZOOLOGICAL SUPPLY	BASIL ARYEETEY	NA	Na na	NA
2000746714	BUVI	amphibian	Amphibia	Bufo	viridis	NA	EUROPEAN GREEN	TOAD	LIV	260	NO	78	EG	EG	T	W	C	C	2000-04-24	2000	2000-04-24	2000	I	LA	CALIFORNIA ZOOLOGICAL SUPPLY	SAIED TOLBA EXPORT	NA	Bufo viridis	NA
2000755631	RACA	amphibian	Amphibia	Rana	catesbeiana	NA	NA	BULLFROG	LIV	469	NO	261	DO	DO	T	C	C	C	2000-04-24	2000	2000-04-24	2000	I	NW	TIN TIN FISH TRADING INC.	LIVE FROGS DOMINICAN SA	Original value in 'species' column: catesbeinana	Rana catesbeiana	Rana catesbeiana
2000794728	RABE	amphibian	Amphibia	Rana	berlandieri	NA	RIO GRANDE	FROG	LIV	400	KG	2583	MX	MX	T	W	C	C	2000-04-24	2000	2000-04-24	2000	I	BV	RANA LABORATORIES	MONTALVO ALVARO GARZA	NA	Rana berlandieri	Rana berlandieri
2000819612	RACA	amphibian	Amphibia	Rana	catesbeiana	NA	NA	BULLFROG	LIV	1000	KG	1000	BR	BR	T	W	C	C	2000-04-25	2000	2000-04-24	2000	I	NY	KIN YICK TRADING CORPORATION	IMPORT & EXPORT RANAJAX	Original value in 'species' column: catesbeinana	Rana catesbeiana	Rana catesbeiana
2000754141	RACA	amphibian	Amphibia	Rana	catesbeiana	NA	NA	BULLFROG	LIV	914	KG	914	EC	EC	T	C	C	C	2000-05-22	2000	2000-04-25	2000	I	NW	KIN YICK TRADING CORPORATION	ASOCIACION DE PRODUCTORES	Original value in 'species' column: catesbeinana	Rana catesbeiana	Rana catesbeiana
2000754622	RACA	amphibian	Amphibia	Rana	catesbeiana	NA	NA	BULLFROG	LIV	2000	NO	700	TW	TW	T	W	C	C	2000-05-05	2000	2000-04-25	2000	I	NY	HOY LUNG COMPANY	HORREI FISHERY COMPANY	Original value in 'species' column: catesbeinana	Rana catesbeiana	Rana catesbeiana
2000755635	RACA	amphibian	Amphibia	Rana	catesbeiana	NA	NA	BULLFROG	LIV	5000	NO	275	DO	DO	T	C	C	C	2000-04-24	2000	2000-04-25	2000	I	NW	TIN TIN FISH TRADING INC.	LIVE FROGS DOMINICA PRESA DE HATILLO	Original value in 'species' column: catesbeinana	Rana catesbeiana	Rana catesbeiana
2000835781	AGCL	amphibian	Amphibia	Agalychnis	callidryas	NA	RED-EYED TREE	FROG	LIV	68	NO	680	HN	HN	T	U	C	C	2000-04-25	2000	2000-04-25	2000	I	MI	MIAMI REPTILE	BREEDING FARMS CORP.	NA	Agalychnis callidryas	Agalychnis callidryas
2000835781	PHRV	amphibian	Amphibia	Phrynohyas	venulosa	NA	VEINED TREE	FROG	LIV	50	NO	175	HN	HN	T	U	C	C	2000-04-25	2000	2000-04-25	2000	I	MI	MIAMI REPTILE	BREEDING FARMS CORP.	NA	Phrynohyas venulosa	NA
2000749447	HYMC	amphibian	Amphibia	Hymenochirus	curtipes	NA	W. DWARF CLAWED	FROG	LIV	1000	NO	110	HK	HK	T	U	C	C	2000-04-26	2000	2000-04-26	2000	I	TP	5-D TROPICAL, INC.	WUN FAT AQUARIUM	NA	Hymenochirus curtipes	Hymenochirus curtipes
2000754159	RACA	amphibian	Amphibia	Rana	catesbeiana	NA	NA	BULLFROG	LIV	1450	NO	413	DO	DO	T	W	C	C	2000-05-12	2000	2000-04-26	2000	I	NW	NORTH SEA TRADING CORP.	HECTOR ANT. TORO	Original value in 'species' column: catesbeinana	Rana catesbeiana	Rana catesbeiana
2000755719	RACA	amphibian	Amphibia	Rana	catesbeiana	NA	NA	BULLFROG	LIV	5000	NO	275	DO	DO	T	C	C	C	2000-04-24	2000	2000-04-26	2000	I	NW	TIN TIN FISH TRADING INC.	LIVE FROGS DOMINICA SA	Original value in 'species' column: catesbeinana	Rana catesbeiana	Rana catesbeiana
2000814759	CYOR	amphibian	Amphibia	Cynops	orientalis	NA	CHINESE DWARF	NEWT	LIV	200	NO	10	CN	CN	T	W	C	C	2000-04-26	2000	2000-04-26	2000	I	NY	MIN HUA ENTERPRISE, INC.	SHANGHAI ESWELL ENTERPRISE COMPANY	NA	Cynops orientalis	Cynops orientalis
2000828868	KALO	amphibian	Amphibia	Kaloula	pulchra	NA	ASIATIC PAINTED	FROG	LIV	200	NO	60	VN	VN	T	U	C	C	2000-04-28	2000	2000-04-26	2000	I	MI	STUBBS, RICHARD A	VCS CORP.	NA	Kaloula pulchra	Kaloula pulchra
2000750315	ANCT	amphibian	Amphibia	NA	NA	NA	NON-CITES	AMPHIBIANS	LIV	10000	NO	500	RU	RU	T	W	C	C	2000-04-27	2000	2000-04-27	2000	I	NY	REPTILE MASTERS	ZOOLEX COMPANY	NA	Na na	NA
2000754616	RACA	amphibian	Amphibia	Rana	catesbeiana	NA	NA	BULLFROG	LIV	1000	KG	1000	BR	BR	T	W	C	C	2000-05-05	2000	2000-04-27	2000	I	NY	KIN YICK TRADING CORPORATION	RANAJAX IMPORT AND EXPORT	Original value in 'species' column: catesbeinana	Rana catesbeiana	Rana catesbeiana
2000755611	RATI	amphibian	Amphibia	Hoplobatrachus	tigerinus	NA	INDIAN	BULLFROG	MEA	8505	NO	29788	VN	VN	T	C	C	C	2000-05-02	2000	2000-04-27	2000	I	NW	EXPACK SEAFOOD INC.	SPECIAL AQUATIC PRO IMP AND EXP CO	NA	Hoplobatrachus tigerinus	Hoplobatrachus tigerinus
2000828931	KASE	amphibian	Amphibia	Kassina	senegalensis	NA	SENEGAL RUNNING	FROG	LIV	25	NO	0	TG	TG	T	U	C	C	2000-04-28	2000	2000-04-27	2000	I	MI	GAMA SUPPLIERS, INC.	TOGANIM	NA	Kassina senegalensis	Kassina senegalensis
2000828949	BUVI	amphibian	Amphibia	Bufo	viridis	NA	EUROPEAN GREEN	TOAD	LIV	240	NO	180	EG	EG	T	U	C	C	2000-04-28	2000	2000-04-27	2000	I	MI	GLOBAL TROPICAL IMP/EXP	TOP TRADERS	NA	Bufo viridis	NA
2000842679	ANCT	amphibian	Amphibia	NA	NA	NA	NON-CITES	AMPHIBIANS	SPE	930	NO	0	LA	LA	S	W	C	C	2000-11-17	2000	2000-04-27	2000	I	CH	FIELD MUS. DIV. OF AMPHIBIANS AND REPTILES	BRYAN STUART- WILDLIFE CONSERVATION SOCIETY	NA	Na na	NA
2000842679	BUME	amphibian	Amphibia	Bufo	melanostictus	NA	BLACK-SPINED	TOAD	SPE	16	NO	0	LA	LA	S	W	C	C	2000-11-17	2000	2000-04-27	2000	I	CH	FIELD MUS. DIV. OF AMPHIBIANS AND REPTILES	BRYAN STUART- WILDLIFE CONSERVATION SOCIETY	NA	Bufo melanostictus	Duttaphrynus melanostictus
2000842679	KALO	amphibian	Amphibia	Kaloula	pulchra	NA	ASIATIC PAINTED	FROG	SPE	10	NO	0	LA	LA	S	W	C	C	2000-11-17	2000	2000-04-27	2000	I	CH	FIELD MUS. DIV. OF AMPHIBIANS AND REPTILES	BRYAN STUART- WILDLIFE CONSERVATION SOCIETY	NA	Kaloula pulchra	Kaloula pulchra
2000842679	RALA	amphibian	Amphibia	Rana	latastei	NA	ITALIAN AGILE	FROG	SKE	10	NO	0	LA	LA	S	W	C	C	2000-11-17	2000	2000-04-27	2000	I	CH	FIELD MUS. DIV. OF AMPHIBIANS AND REPTILES	BRYAN STUART- WILDLIFE CONSERVATION SOCIETY	NA	Rana latastei	Rana latastei
2000842679	RHRE	amphibian	Amphibia	Rhacophorus	reinwardtii	NA	REINWARDT'S FLYING	FROG	SKE	4	NO	0	LA	LA	S	W	C	C	2000-11-17	2000	2000-04-27	2000	I	CH	FIELD MUS. DIV. OF AMPHIBIANS AND REPTILES	BRYAN STUART- WILDLIFE CONSERVATION SOCIETY	NA	Rhacophorus reinwardtii	Rhacophorus reinwardtii
2000754158	RACA	amphibian	Amphibia	Rana	catesbeiana	NA	NA	BULLFROG	LIV	1300	NO	378	DO	DO	T	W	C	C	2000-04-27	2000	2000-04-28	2000	I	NW	NORTH SEA TRADING CORPORATION	HECTOR ANT. TORO	Original value in 'species' column: catesbeinana	Rana catesbeiana	Rana catesbeiana
2000794593	RACA	amphibian	Amphibia	Rana	catesbeiana	NA	NA	BULLFROG	SPE	343	NO	550	MX	MX	T	W	C	C	2000-04-28	2000	2000-04-28	2000	I	NG	RANACO CORPORATION	P.A.M.E.E.S.A.	Original value in 'species' column: catesbeinana	Rana catesbeiana	Rana catesbeiana
2000794593	RAFO	amphibian	Amphibia	Rana	forreri	NA	FORRER'S GRASS	FROG	SPE	16490	NO	8730	MX	MX	T	W	C	C	2000-04-28	2000	2000-04-28	2000	I	NG	RANACO CORPORATION	P.A.M.E.E.S.A.	NA	Rana forreri	Rana forreri
2000747785	RACA	amphibian	Amphibia	Rana	catesbeiana	NA	NA	BULLFROG	LEG	19051	KG	99743	TW	TW	T	W	C	C	2000-04-26	2000	2000-04-29	2000	I	LA	BEAVER STREET FISHERIES, INC.	MOON RIVER FOODS COMPANY LTD	Original value in 'species' column: catesbeinana	Rana catesbeiana	Rana catesbeiana
2000748063	BOOR	amphibian	Amphibia	Bombina	orientalis	NA	ORIENTAL FIREBELLY	TOAD	LIV	7000	NO	3500	KR	KR	T	W	C	C	2000-04-29	2000	2000-04-29	2000	I	LA	GEO INTERNATIONAL	INTERPET KOREA	NA	Bombina orientalis	Bombina orientalis
2000749805	BOOR	amphibian	Amphibia	Bombina	orientalis	NA	ORIENTAL FIREBELLY	TOAD	LIV	5000	NO	2750	KR	KR	T	W	C	C	2000-04-29	2000	2000-04-29	2000	I	LA	PET-SIAM INTERNATIONAL	YICHO SANGSA	NA	Bombina orientalis	Bombina orientalis
2000754167	RACA	amphibian	Amphibia	Rana	catesbeiana	NA	NA	BULLFROG	LIV	908	KG	450	DO	DO	T	C	C	C	2000-05-22	2000	2000-04-29	2000	I	NW	TIN TIN FISH TRADING INC.	LIVE FROGS	Original value in 'species' column: catesbeinana	Rana catesbeiana	Rana catesbeiana
2000754458	ANCT	amphibian	Amphibia	NA	NA	NA	NON-CITES	AMPHIBIANS	LIV	1500	NO	225	HK	HK	T	W	C	C	2000-05-01	2000	2000-04-29	2000	I	NY	TRANSSHIP DISCOUNTS LTD.	UNION TROPICAL FISH FARM	NA	Na na	NA
2000764719	CYPY	amphibian	Amphibia	Cynops	pyrrhogaster	NA	JAPANESE FIREBELLY	NEWT	LIV	150	NO	83	HK	HK	T	W	C	C	2000-05-08	2000	2000-04-29	2000	I	NY	ERDA INC.	BROTHER AQUARIUM	NA	Cynops pyrrhogaster	Cynops pyrrhogaster
2000746477	HYMC	amphibian	Amphibia	Hymenochirus	curtipes	NA	W. DWARF CLAWED	FROG	LIV	1600	NO	640	SG	SG	T	C	C	C	2000-04-30	2000	2000-04-30	2000	I	LA	AQUA-NAUTIC SPECIALIST	AQUANAUTICS SPECIALIST PTE	NA	Hymenochirus curtipes	Hymenochirus curtipes
2000746511	HYMC	amphibian	Amphibia	Hymenochirus	curtipes	NA	W. DWARF CLAWED	FROG	LIV	1100	NO	440	SG	SG	T	C	C	C	2000-04-30	2000	2000-04-30	2000	I	LA	AQUA-NAUTIC SPECIALIST	AQUANAUTICS SPECIALIST PTE LTD	NA	Hymenochirus curtipes	Hymenochirus curtipes
2000749355	HYMC	amphibian	Amphibia	Hymenochirus	curtipes	NA	W. DWARF CLAWED	FROG	LIV	500	NO	200	SG	SG	T	C	C	C	2000-04-30	2000	2000-04-30	2000	I	LA	AQUACO, INC.	SUNRISE AQUARIUM PTE LIMITED	NA	Hymenochirus curtipes	Hymenochirus curtipes
2000749554	CYOR	amphibian	Amphibia	Cynops	orientalis	NA	CHINESE DWARF	NEWT	LIV	575	NO	91	HK	HK	T	C	C	C	2000-04-30	2000	2000-04-30	2000	I	LA	DOLPHIN INTERNATIONAL	SANWOO FISHERIES	NA	Cynops orientalis	Cynops orientalis
2000749554	HYMC	amphibian	Amphibia	Hymenochirus	curtipes	NA	W. DWARF CLAWED	FROG	LIV	3640	NO	437	HK	HK	T	C	C	C	2000-04-30	2000	2000-04-30	2000	I	LA	DOLPHIN INTERNATIONAL	SANWOO FISHERIES	NA	Hymenochirus curtipes	Hymenochirus curtipes
2000749557	HYMC	amphibian	Amphibia	Hymenochirus	curtipes	NA	W. DWARF CLAWED	FROG	LIV	900	NO	54	ID	ID	T	W	C	C	2000-04-30	2000	2000-04-30	2000	I	LA	DOLPHIN INTERNATIONAL	VIVARIA INDONESIA	NA	Hymenochirus curtipes	Hymenochirus curtipes
2000749557	LICA	amphibian	Amphibia	Litoria	caerulea	NA	WHITE'S TREE	FROG	LIV	130	NO	138	ID	ID	T	W	C	C	2000-04-30	2000	2000-04-30	2000	I	LA	DOLPHIN INTERNATIONAL	VIVARIA INDONESIA	NA	Litoria caerulea	Litoria caerulea
2000749557	OOLI	amphibian	Amphibia	Occidozyga	lima	NA	PADDY	FROG	LIV	825	NO	43	ID	ID	T	W	C	C	2000-04-30	2000	2000-04-30	2000	I	LA	DOLPHIN INTERNATIONAL	VIVARIA INDONESIA	Original value in 'genus' column: ooedozyga	Occidozyga lima	Occidozyga lima
2000749585	CYOR	amphibian	Amphibia	Cynops	orientalis	NA	CHINESE DWARF	NEWT	LIV	7500	NO	732	CN	CN	T	C	C	C	2000-04-30	2000	2000-04-30	2000	I	LA	DOLPHIN INTERNATIONAL	SHANGHAI GOLDEN FIELD	NA	Cynops orientalis	Cynops orientalis
2000749585	PACB	amphibian	Amphibia	Pachytriton	brevipes	NA	TSITOU	NEWT	LIV	600	NO	254	CN	CN	T	C	C	C	2000-04-30	2000	2000-04-30	2000	I	LA	DOLPHIN INTERNATIONAL	SHANGHAI GOLDEN FIELD	NA	Pachytriton brevipes	Pachytriton brevipes
2000750806	BOOR	amphibian	Amphibia	Bombina	orientalis	NA	ORIENTAL FIREBELLY	TOAD	LIV	6000	NO	3000	KR	KR	T	W	C	C	2000-04-30	2000	2000-04-30	2000	I	LA	GEO INTERNATIONAL	INTERPET KOREA	NA	Bombina orientalis	Bombina orientalis
2000751112	DEAU	amphibian	Amphibia	Dendrobates	auratus	NA	GREEN	POISON-ARROW FROG	LIV	29	NO	87	NL	NL	T	C	C	C	2000-04-30	2000	2000-04-30	2000	I	LA	REPTILE SPECIALTIES	KWEKERJI RANA V.O.F.	NA	Dendrobates auratus	Dendrobates auratus
2000751112	DEGA	amphibian	Amphibia	Dendrobates	galactonotus	NA	SPLASH-BACKED	POISON-ARROW FROG	LIV	10	NO	50	NL	NL	T	C	C	C	2000-04-30	2000	2000-04-30	2000	I	LA	REPTILE SPECIALTIES	KWEKERJI RANA V.O.F.	NA	Dendrobates galactonotus	Adelphobates galactonotus
2000751112	DENM	amphibian	Amphibia	Epipedobates	maculatus	NA	CONFUSING	POISON-ARROW FROG	LIV	27	NO	108	NL	NL	T	C	C	C	2000-04-30	2000	2000-04-30	2000	I	LA	REPTILE SPECIALTIES	KWEKERJI RANA V.O.F.	NA	Epipedobates maculatus	Ameerega maculata
2000751112	DETI	amphibian	Amphibia	Dendrobates	tinctorius	NA	DYEING	POISON-ARROW FROG	LIV	115	NO	460	NL	NL	T	C	C	C	2000-04-30	2000	2000-04-30	2000	I	LA	REPTILE SPECIALTIES	KWEKERJI RANA V.O.F.	NA	Dendrobates tinctorius	Dendrobates tinctorius
2000751112	DLEU	amphibian	Amphibia	Dendrobates	leucomelas	NA	YELLOW-BANDED	POISON-ARROW FROG	LIV	30	NO	150	NL	NL	T	C	C	C	2000-04-30	2000	2000-04-30	2000	I	LA	REPTILE SPECIALTIES	KWEKERJI RANA V.O.F.	NA	Dendrobates leucomelas	Dendrobates leucomelas
2000751112	DTRI	amphibian	Amphibia	Epipedobates	tricolor	NA	PHANTASMAL	POISON-ARROW FROG	LIV	20	NO	50	NL	NL	T	C	C	C	2000-04-30	2000	2000-04-30	2000	I	LA	REPTILE SPECIALTIES	KWEKERJI RANA V.O.F.	NA	Epipedobates tricolor	Epipedobates tricolor
2000751112	DTRV	amphibian	Amphibia	Epipedobates	trivittatus	NA	THREE-STRIPED	POISON-ARROW FROG	LIV	10	NO	30	NL	NL	T	C	C	C	2000-04-30	2000	2000-04-30	2000	I	LA	REPTILE SPECIALTIES	KWEKERJI RANA V.O.F.	NA	Epipedobates trivittatus	Ameerega trivittata
2000752126	CYPY	amphibian	Amphibia	Cynops	pyrrhogaster	NA	JAPANESE FIREBELLY	NEWT	LIV	400	NO	108	CN	CN	T	W	C	C	2000-05-04	2000	2000-04-30	2000	I	NY	FISH MART INC.	SHANGHAI INTERNATIONAL TRADER SERVICE	NA	Cynops pyrrhogaster	Cynops pyrrhogaster
2000758157	HYMC	amphibian	Amphibia	Hymenochirus	curtipes	NA	W. DWARF CLAWED	FROG	LIV	1600	NO	352	HK	HK	T	C	C	C	2000-04-30	2000	2000-04-30	2000	I	LA	AQUACO, INC.	DRAGON FISHERIES	NA	Hymenochirus curtipes	Hymenochirus curtipes
2000760048	OOLI	amphibian	Amphibia	Occidozyga	lima	NA	PADDY	FROG	LIV	150	NO	14	ID	ID	T	W	C	C	2000-05-01	2000	2000-04-30	2000	I	NY	TRANSSHIP DISCOUNTS LTD.	VIVAJAYA INTERNATIONAL	Original value in 'genus' column: ooedozyga	Occidozyga lima	Occidozyga lima
2000793168	RACA	amphibian	Amphibia	Rana	catesbeiana	NA	NA	BULLFROG	LIV	5000	KG	885	EC	EC	T	C	C	C	2000-04-30	2000	2000-04-30	2000	I	NW	KIN YICK TRADING CORPORATION	VIVA COCE PORTUGAL	Original value in 'species' column: catesbeinana	Rana catesbeiana	Rana catesbeiana
2000788724	RACA	amphibian	Amphibia	Rana	catesbeiana	NA	NA	BULLFROG	LIV	1400	NO	403	DO	DO	T	C	C	C	2000-08-29	2000	2000-05-01	2000	I	NW	NORTH SEA TRADING CORPORATION	HECTOR ANT. TORO	Original value in 'species' column: catesbeinana	Rana catesbeiana	Rana catesbeiana
2000790374	RMAC	amphibian	Amphibia	Rana	macrodon	NA	NA	BULLFROG	LEG	19051	KG	77138	VN	VN	T	W	C	C	2000-05-02	2000	2000-05-01	2000	I	BO	INTEROCEAN INC.	CANTHO AGRICULTURAL ANIMAL & PRODUCTS	NA	Rana macrodon	NA
2000755319	RACA	amphibian	Amphibia	Rana	catesbeiana	NA	NA	BULLFROG	LIV	1122	NO	928	EC	EC	T	C	C	C	2000-05-04	2000	2000-05-02	2000	I	NW	KIN YICK TRADING CORPORATION	ASOCIACION PRODUCTORES	Original value in 'species' column: catesbeinana	Rana catesbeiana	Rana catesbeiana
2000760910	RACA	amphibian	Amphibia	Rana	catesbeiana	NA	NA	BULLFROG	LIV	699	KG	417	DO	DO	T	C	C	C	2000-06-07	2000	2000-05-02	2000	I	NW	TIN TIN FISH TRADING INC.	LIVE FROGS DOM S.A.	Original value in 'species' column: catesbeinana	Rana catesbeiana	Rana catesbeiana
2000781440	XELA	amphibian	Amphibia	Xenopus	laevis	NA	AFRICAN CLAWED	TOAD	LIV	1300	NO	4420	CL	CL	T	C	C	C	2000-05-02	2000	2000-05-02	2000	I	CH	XENOPUS I, INC.	CARLOS DEL RIO CAMUS	NA	Xenopus laevis	Xenopus laevis
2000794722	RABE	amphibian	Amphibia	Rana	berlandieri	NA	RIO GRANDE	FROG	LIV	300	KG	1937	MX	MX	T	W	C	C	2000-05-02	2000	2000-05-02	2000	I	BV	RANA LABORATORIES	MONTALVO ALVARO GARZA	NA	Rana berlandieri	Rana berlandieri
2000799227	DETI	amphibian	Amphibia	Dendrobates	tinctorius	NA	DYEING	POISON-ARROW FROG	LIV	36	NO	900	SR	SR	T	W	C	C	2000-05-02	2000	2000-05-02	2000	I	MI	GAMA SUPPLIERS, INC.	FANNAS PET SHOP	NA	Dendrobates tinctorius	Dendrobates tinctorius
2000904049	PPIP	amphibian	Amphibia	Pipa	pipa	NA	SURINAM	TOAD	LIV	50	NO	350	SR	SR	T	W	C	C	2000-05-23	2000	2000-05-02	2000	I	MI	MIAMI REPTILE	HENZEN SANCHES	NA	Pipa pipa	Pipa pipa
2000257054	BRMO	amphibian	Amphibia	Breviceps	mossambiscus	NA	MZ SHORT-HEADED	FROG	LIV	100	NO	125	TZ	TZ	T	W	C	C	2000-05-03	2000	2000-05-03	2000	I	MI	MID-AMERICAN REPTILES INC	KIRYA GENERAL SUPPLIES IMP. EXP.	NA	Breviceps mossambiscus	NA
2000257054	HYVI	amphibian	Amphibia	Hyperolius	viridiflavus	NA	COMMON REED	FROG	LIV	200	NO	250	TZ	TZ	T	W	C	C	2000-05-03	2000	2000-05-03	2000	I	MI	MID-AMERICAN REPTILES INC	KIRYA GENERAL SUPPLIES IMP. EXP.	NA	Hyperolius viridiflavus	Hyperolius viridiflavus
2000257054	PYAD	amphibian	Amphibia	Pyxicephalus	adspersus	NA	TSCHUDI'S AFRICAN	BULLFROG	LIV	100	NO	250	TZ	TZ	T	W	C	C	2000-05-03	2000	2000-05-03	2000	I	MI	MID-AMERICAN REPTILES INC	KIRYA GENERAL SUPPLIES IMP. EXP.	NA	Pyxicephalus adspersus	Pyxicephalus adspersus
2000754164	RACA	amphibian	Amphibia	Rana	catesbeiana	NA	NA	BULLFROG	LIV	681	KG	401	DO	DO	T	C	C	C	2000-05-22	2000	2000-05-03	2000	I	NW	TIN TIN FISH TRADING INC.	LIVE FROGS	Original value in 'species' column: catesbeinana	Rana catesbeiana	Rana catesbeiana
2000760578	RACA	amphibian	Amphibia	Rana	catesbeiana	NA	NA	BULLFROG	LIV	2000	NO	700	TW	TW	T	W	C	C	2000-05-05	2000	2000-05-03	2000	I	NY	HOY LUNG SEAFOOD CORPORATION	HORREI FISHERY CO	Original value in 'species' column: catesbeinana	Rana catesbeiana	Rana catesbeiana
2000760580	RACA	amphibian	Amphibia	Rana	catesbeiana	NA	NA	BULLFROG	LIV	3000	NO	945	TW	TW	T	W	C	C	2000-05-05	2000	2000-05-03	2000	I	NY	HOY LUNG SEAFOOD CORPORATION	HORREI FISHERY CO	Original value in 'species' column: catesbeinana	Rana catesbeiana	Rana catesbeiana
2000761173	CYOR	amphibian	Amphibia	Cynops	orientalis	NA	CHINESE DWARF	NEWT	LIV	100	NO	471	CN	CN	T	W	C	C	2000-05-10	2000	2000-05-03	2000	I	NY	MIN HUA ENTERPRISE, INC.	SHANGHAI ESWELL ENTERPRISE COMPANY	NA	Cynops orientalis	Cynops orientalis
2000761384	RACA	amphibian	Amphibia	Rana	catesbeiana	NA	NA	BULLFROG	LIV	1164	KG	1100	EC	EC	T	C	C	C	2000-06-13	2000	2000-05-03	2000	I	NW	HAY LUNG CO	HAY LUNG CO	Original value in 'species' column: catesbeinana	Rana catesbeiana	Rana catesbeiana
2000766603	RACA	amphibian	Amphibia	Rana	catesbeiana	NA	NA	BULLFROG	LIV	429	NO	450	MX	MX	T	W	C	C	2000-05-03	2000	2000-05-03	2000	I	MP	BIO CORPORATION	NA	Original value in 'species' column: catesbeinana	Rana catesbeiana	Rana catesbeiana
2000766603	RAPI	amphibian	Amphibia	Rana	pipiens	NA	NORTHERN LEOPARD	FROG	LIV	3295	NO	1710	MX	MX	T	W	C	C	2000-05-03	2000	2000-05-03	2000	I	MP	BIO CORPORATION	NA	NA	Rana pipiens	Rana pipiens
2000779444	PHRV	amphibian	Amphibia	Phrynohyas	venulosa	NA	VEINED TREE	FROG	LIV	50	NO	175	HN	HN	T	W	C	C	2000-05-03	2000	2000-05-03	2000	I	MI	MIAMI REPTILES	BREEDING FARMS CORP	NA	Phrynohyas venulosa	NA
2000782231	BUME	amphibian	Amphibia	Bufo	melanostictus	NA	BLACK-SPINED	TOAD	LIV	50	NO	15	VN	VN	T	U	C	C	2000-05-03	2000	2000-05-03	2000	I	MI	GAMA SUPPLIERS, INC.	VINAFOR HANOI	NA	Bufo melanostictus	Duttaphrynus melanostictus
2000782231	KALO	amphibian	Amphibia	Kaloula	pulchra	NA	ASIATIC PAINTED	FROG	LIV	150	NO	45	VN	VN	T	U	C	C	2000-05-03	2000	2000-05-03	2000	I	MI	GAMA SUPPLIERS, INC.	VINAFOR HANOI	NA	Kaloula pulchra	Kaloula pulchra
2000765273	HYMC	amphibian	Amphibia	Hymenochirus	curtipes	NA	W. DWARF CLAWED	FROG	LIV	2000	NO	220	HK	HK	T	U	C	C	2000-05-04	2000	2000-05-04	2000	I	TP	5-D TROPICAL, INC.	WUN FAT AQUARIUM	NA	Hymenochirus curtipes	Hymenochirus curtipes
2000789246	RACA	amphibian	Amphibia	Rana	catesbeiana	NA	NA	BULLFROG	LIV	5000	NO	598	DO	DO	T	C	C	C	2000-08-29	2000	2000-05-04	2000	I	NW	TIN TIN FISH TRADING INC.	LIVE FROGS	Original value in 'species' column: catesbeinana	Rana catesbeiana	Rana catesbeiana
2000793365	XELA	amphibian	Amphibia	Xenopus	laevis	NA	AFRICAN CLAWED	TOAD	LIV	1000	NO	100	NG	NG	T	W	C	C	2000-05-04	2000	2000-05-04	2000	I	NW	GLOBAL TROPICAL RESOURCES INC.	SPIUAP NIGERIA LTD	NA	Xenopus laevis	Xenopus laevis
2000752443	RACA	amphibian	Amphibia	Rana	catesbeiana	NA	NA	BULLFROG	LIV	5000	NO	343	DO	DO	T	C	C	C	2000-05-08	2000	2000-05-05	2000	I	NW	NORTH SEA TRADING CORPORATION	HECTOR ANT. TORO	Original value in 'species' column: catesbeinana	Rana catesbeiana	Rana catesbeiana
2000757908	LICA	amphibian	Amphibia	Litoria	caerulea	NA	WHITE'S TREE	FROG	LIV	150	NO	390	ID	ID	T	W	C	C	2000-05-05	2000	2000-05-05	2000	I	DF	TEPEDELEN, KAMURAN	CV TERRARIA INDONESIA	NA	Litoria caerulea	Litoria caerulea
2000757908	MENA	amphibian	Amphibia	Megophrys	nasuta	NA	SPADEFOOT	TOAD	LIV	50	NO	259	ID	ID	T	W	C	C	2000-05-05	2000	2000-05-05	2000	I	DF	TEPEDELEN, KAMURAN	CV TERRARIA INDONESIA	NA	Megophrys nasuta	Pelobatrachus nasuta
2000757908	RHRE	amphibian	Amphibia	Rhacophorus	reinwardtii	NA	REINWARDT'S FLYING	FROG	LIV	25	NO	130	ID	ID	T	W	C	C	2000-05-05	2000	2000-05-05	2000	I	DF	TEPEDELEN, KAMURAN	CV TERRARIA INDONESIA	NA	Rhacophorus reinwardtii	Rhacophorus reinwardtii
2000794597	BMAR	amphibian	Amphibia	Bufo	marinus	NA	NEOTROPICAL	TOAD	SPE	4	NO	3	MX	MX	T	W	C	C	2000-05-04	2000	2000-05-05	2000	I	NG	RANACO CORPORATION	P.A.M.E.E.S.A.	NA	Bufo marinus	NA
2000794597	RACA	amphibian	Amphibia	Rana	catesbeiana	NA	NA	BULLFROG	SPE	245	NO	220	MX	MX	T	W	C	C	2000-05-04	2000	2000-05-05	2000	I	NG	RANACO CORPORATION	P.A.M.E.E.S.A.	Original value in 'species' column: catesbeinana	Rana catesbeiana	Rana catesbeiana
2000794597	RAFO	amphibian	Amphibia	Rana	forreri	NA	FORRER'S GRASS	FROG	SPE	9401	NO	5670	MX	MX	T	W	C	C	2000-05-04	2000	2000-05-05	2000	I	NG	RANACO CORPORATION	P.A.M.E.E.S.A.	NA	Rana forreri	Rana forreri
2000819596	RACA	amphibian	Amphibia	Rana	catesbeiana	NA	NA	BULLFROG	LIV	5000	NO	1000	BR	BR	T	W	C	C	2000-05-10	2000	2000-05-05	2000	I	NY	KIN YICK TRADING CORPORATION	RANA JAX IMPORT EXPORT	Original value in 'species' column: catesbeinana	Rana catesbeiana	Rana catesbeiana
2000749386	BOOR	amphibian	Amphibia	Bombina	orientalis	NA	ORIENTAL FIREBELLY	TOAD	LIV	10000	NO	5000	KR	KR	T	W	C	C	2000-05-06	2000	2000-05-06	2000	I	LA	GEO INTERNATIONAL	INTERPET KOREA	NA	Bombina orientalis	Bombina orientalis
2000760194	BOOR	amphibian	Amphibia	Bombina	orientalis	NA	ORIENTAL FIREBELLY	TOAD	LIV	10000	NO	2500	KR	KR	T	W	C	C	2000-05-06	2000	2000-05-06	2000	I	LA	Z IMPORTS INC.	LYE HYUNG FISHERIES	NA	Bombina orientalis	Bombina orientalis
2000789251	RACA	amphibian	Amphibia	Rana	catesbeiana	NA	NA	BULLFROG	LIV	5000	NO	459	DO	DO	T	C	C	C	2000-08-29	2000	2000-05-06	2000	I	NW	TIN TIN FISHING TRADING INC	LIVE FROGS	Original value in 'species' column: catesbeinana	Rana catesbeiana	Rana catesbeiana
2000820910	CYOR	amphibian	Amphibia	Cynops	orientalis	NA	CHINESE DWARF	NEWT	LIV	60	NO	25	HK	HK	T	W	C	C	2000-05-08	2000	2000-05-06	2000	I	NY	TRANSSHIP DISCOUNTS LTD.	UNION TROPICAL FISH FARM	NA	Cynops orientalis	Cynops orientalis
2000820910	XELA	amphibian	Amphibia	Xenopus	laevis	NA	AFRICAN CLAWED	TOAD	LIV	2375	NO	356	HK	HK	T	W	C	C	2000-05-08	2000	2000-05-06	2000	I	NY	TRANSSHIP DISCOUNTS LTD.	UNION TROPICAL FISH FARM	NA	Xenopus laevis	Xenopus laevis
2000821535	HYMC	amphibian	Amphibia	Hymenochirus	curtipes	NA	W. DWARF CLAWED	FROG	LIV	450	NO	98	HK	HK	T	W	C	C	2000-05-08	2000	2000-05-06	2000	I	NY	ERDA INC.	BROTHER AQUARIUM	NA	Hymenochirus curtipes	Hymenochirus curtipes
2000749199	HYMC	amphibian	Amphibia	Hymenochirus	curtipes	NA	W. DWARF CLAWED	FROG	LIV	2000	NO	461	HK	HK	T	W	C	C	2000-05-07	2000	2000-05-07	2000	I	LA	AQUACO, INC.	DRAGON FISHERIES	NA	Hymenochirus curtipes	Hymenochirus curtipes
2000749211	RACA	amphibian	Amphibia	Rana	catesbeiana	NA	NA	BULLFROG	LIV	30	NO	24	SG	SG	T	W	C	C	2000-05-07	2000	2000-05-07	2000	I	LA	AQUACO, INC.	SUNRISE AQUARIUM PTE LIMITED	Original value in 'species' column: catesbeinana	Rana catesbeiana	Rana catesbeiana
2000749913	ANCT	amphibian	Amphibia	NA	NA	NA	NON-CITES	AMPHIBIANS	LIV	300	NO	42	HK	HK	T	W	C	C	2000-05-07	2000	2000-05-07	2000	I	LA	MALLORY WESTERN & LEATHER	CEYLON AQUARIUM	NA	Na na	NA
2000749923	HYMC	amphibian	Amphibia	Hymenochirus	curtipes	NA	W. DWARF CLAWED	FROG	LIV	1500	NO	600	SG	SG	T	W	C	C	2000-05-07	2000	2000-05-07	2000	I	LA	AQUA-NAUTIC SPECIALIST	AQUANAUTICS SPECIALIST PTE LIMITED	NA	Hymenochirus curtipes	Hymenochirus curtipes
2000750367	HYMC	amphibian	Amphibia	Hymenochirus	curtipes	NA	W. DWARF CLAWED	FROG	LIV	1100	NO	440	SG	SG	T	W	C	C	2000-05-07	2000	2000-05-07	2000	I	LA	AQUA-NAUTIC SPECIALIST	AQUANAUTICS SPECIALIST PTE LIMITED	NA	Hymenochirus curtipes	Hymenochirus curtipes
2000750517	BUME	amphibian	Amphibia	Bufo	melanostictus	NA	BLACK-SPINED	TOAD	LIV	60	NO	24	VN	VN	T	W	C	C	2000-05-07	2000	2000-05-07	2000	I	LA	UNIVERSAL AQUATIC	CORIMEX	NA	Bufo melanostictus	Duttaphrynus melanostictus
2000750517	KALO	amphibian	Amphibia	Kaloula	pulchra	NA	ASIATIC PAINTED	FROG	LIV	144	NO	58	VN	VN	T	W	C	C	2000-05-07	2000	2000-05-07	2000	I	LA	UNIVERSAL AQUATIC	CORIMEX	NA	Kaloula pulchra	Kaloula pulchra
2000750517	RLEU	amphibian	Amphibia	Rhacophorus	leucomystax	NA	FLYING	FROG	LIV	216	NO	86	VN	VN	T	W	C	C	2000-05-07	2000	2000-05-07	2000	I	LA	UNIVERSAL AQUATIC	CORIMEX	NA	Rhacophorus leucomystax	NA
2000757901	CYOR	amphibian	Amphibia	Cynops	orientalis	NA	CHINESE DWARF	NEWT	LIV	1400	NO	112	HK	HK	T	W	C	C	2000-05-07	2000	2000-05-07	2000	I	LA	DOLPHIN INTERNATIONAL	SANWOO FISHERIES	NA	Cynops orientalis	Cynops orientalis
2000757901	HYMC	amphibian	Amphibia	Hymenochirus	curtipes	NA	W. DWARF CLAWED	FROG	LIV	3640	NO	437	HK	HK	T	W	C	C	2000-05-07	2000	2000-05-07	2000	I	LA	DOLPHIN INTERNATIONAL	SANWOO FISHERIES	NA	Hymenochirus curtipes	Hymenochirus curtipes
2000757909	ANCT	amphibian	Amphibia	NA	NA	NA	NON-CITES	AMPHIBIANS	LIV	400	NO	172	CN	CN	T	W	C	C	2000-05-07	2000	2000-05-07	2000	I	LA	DOLPHIN INTERNATIONAL	SHANGHAI GOLDEN FIELD GARDENING COMPANY, LTD	NA	Na na	NA
2000757909	ANCT	amphibian	Amphibia	NA	NA	NA	NON-CITES	AMPHIBIANS	LIV	96	NO	130	CN	CN	T	W	C	C	2000-05-07	2000	2000-05-07	2000	I	LA	DOLPHIN INTERNATIONAL	SHANGHAI GOLDEN FIELD GARDENING COMPANY, LTD	NA	Na na	NA
2000757909	CYOR	amphibian	Amphibia	Cynops	orientalis	NA	CHINESE DWARF	NEWT	LIV	6900	NO	690	CN	CN	T	W	C	C	2000-05-07	2000	2000-05-07	2000	I	LA	DOLPHIN INTERNATIONAL	SHANGHAI GOLDEN FIELD GARDENING COMPANY, LTD	NA	Cynops orientalis	Cynops orientalis
2000764690	HYMC	amphibian	Amphibia	Hymenochirus	curtipes	NA	W. DWARF CLAWED	FROG	LIV	1200	NO	264	HK	HK	T	W	C	C	2000-05-15	2000	2000-05-07	2000	I	NY	METROPOLITAN FISH COMPANY LLC	DRAGON FISHERIES	NA	Hymenochirus curtipes	Hymenochirus curtipes
2000754126	RACA	amphibian	Amphibia	Rana	catesbeiana	NA	NA	BULLFROG	LIV	1150	NO	322	DO	DO	T	W	C	C	2000-05-12	2000	2000-05-08	2000	I	NW	NORTH SEA TRADING CORPORATION	HECTOR ANT. TORO	Original value in 'species' column: catesbeinana	Rana catesbeiana	Rana catesbeiana
2000754174	RACA	amphibian	Amphibia	Rana	catesbeiana	NA	NA	BULLFROG	LIV	918	NO	918	EC	EC	T	W	C	C	2000-05-18	2000	2000-05-08	2000	I	NW	KIN YICK TRADING CORPORATION	AGOCIACIOR DE PRODUCTORE	Original value in 'species' column: catesbeinana	Rana catesbeiana	Rana catesbeiana
2000756450	RACA	amphibian	Amphibia	Rana	catesbeiana	NA	NA	BULLFROG	LIV	10000	KG	34564	TW	TW	T	W	C	C	2000-05-08	2000	2000-05-08	2000	I	SF	NOR-CAL SEAFOOD INC.	PENSETO SEAFOOD CO LTD	Original value in 'species' column: catesbeinana	Rana catesbeiana	Rana catesbeiana
2000899735	LARG	amphibian	Amphibia	Leptopelis	argenteus	NA	BAGAM. FOREST TREE	FROG	LIV	30	NO	60	KE	KE	T	U	C	C	2000-05-09	2000	2000-05-08	2000	I	MI	GLADES HERP, INC.	PRICE REPTILES	NA	Leptopelis argenteus	Leptopelis argenteus
2000752466	RACA	amphibian	Amphibia	Rana	catesbeiana	NA	NA	BULLFROG	LIV	5000	NO	1112	EC	EC	T	C	C	C	2000-05-22	2000	2000-05-09	2000	I	NW	KIN YICK TRADING CORPORATION	ASSOCIATION PRODUCTORA	Original value in 'species' column: catesbeinana	Rana catesbeiana	Rana catesbeiana
2000761037	RACA	amphibian	Amphibia	Rana	catesbeiana	NA	NA	BULLFROG	LIV	3000	NO	1029	TW	TW	T	W	C	C	2000-05-18	2000	2000-05-09	2000	I	NY	KIN YICK TRADING CORPORATION	ESTATE GALLEN INT. TRADE	Original value in 'species' column: catesbeinana	Rana catesbeiana	Rana catesbeiana
2000775312	CHIX	amphibian	Amphibia	Chiromantis	xerapelina	NA	AFRICAN GRAY TREE	FROG	LIV	50	NO	75	KE	KE	T	W	C	C	2000-05-09	2000	2000-05-09	2000	I	LA	NATURAL SELECTIONS	PRICE REPTILES	NA	Chiromantis xerapelina	NA
2000775312	HEMM	amphibian	Amphibia	Hemisus	marmoratus	NA	MARBLED SHOVELNOSE	FROG	LIV	20	NO	20	KE	KE	T	W	C	C	2000-05-09	2000	2000-05-09	2000	I	LA	NATURAL SELECTIONS	PRICE REPTILES	NA	Hemisus marmoratus	Hemisus marmoratus
2000775312	KASE	amphibian	Amphibia	Kassina	senegalensis	NA	SENEGAL RUNNING	FROG	LIV	100	NO	75	KE	KE	T	W	C	C	2000-05-09	2000	2000-05-09	2000	I	LA	NATURAL SELECTIONS	PRICE REPTILES	NA	Kassina senegalensis	Kassina senegalensis
2000798691	RACA	amphibian	Amphibia	Rana	catesbeiana	NA	NA	BULLFROG	LIV	3000	NO	4930	GT	GT	T	U	C	C	2000-05-09	2000	2000-05-09	2000	I	MI	AQUALAND, INC.	PRODUCTOS MOBOT S.A.	Original value in 'species' column: catesbeinana	Rana catesbeiana	Rana catesbeiana
2000760094	RANC	amphibian	Amphibia	Rana	clamitans	NA	GREEN	FROG	MEA	8899	KG	21012	CN	CN	T	C	C	C	2000-05-15	2000	2000-05-10	2000	I	LA	RED CHAMBER COMPANY	SHENZHEN ALLIED AQUATIC DEVELOPMENT LIMITED	NA	Rana clamitans	Rana clamitans
2000765036	HYMB	amphibian	Amphibia	Hymenochirus	boettgeri	NA	ZAIRE DWARF CLAWED	FROG	LIV	2000	NO	220	HK	HK	T	W	C	C	2000-05-10	2000	2000-05-10	2000	I	TP	5-D TROPICAL, INC.	WUN FAT AQUARIUM	NA	Hymenochirus boettgeri	Hymenochirus boettgeri
2000772781	PBIF	amphibian	Amphibia	Phrynomantis	bifasciatus	NA	S AFR SNAKE-NECK	FROG	LIV	263	NO	131	TZ	TZ	T	W	C	C	2000-05-10	2000	2000-05-10	2000	I	LA	L. A. REPTILE	KISASE INVESTMENTS	NA	Phrynomantis bifasciatus	Phrynomantis bifasciatus
2000803753	XELA	amphibian	Amphibia	Xenopus	laevis	NA	AFRICAN CLAWED	TOAD	LIV	1225	NO	123	NG	NG	T	W	C	C	2000-05-10	2000	2000-05-10	2000	I	NY	OKUOLU INTERNATIONAL USA INC.	OKUOLU INTERNATIONAL, LTD	NA	Xenopus laevis	Xenopus laevis
2000759715	RLEU	amphibian	Amphibia	Rhacophorus	leucomystax	NA	FLYING	FROG	LIV	200	NO	60	VN	VN	T	W	C	C	2000-05-11	2000	2000-05-11	2000	I	LA	R. H. PET INCORPORATED	CONFICO LIMITED	NA	Rhacophorus leucomystax	NA
2000761858	RACA	amphibian	Amphibia	Rana	catesbeiana	NA	NA	BULLFROG	LIV	959	KG	959	EC	EC	T	C	C	C	2000-05-19	2000	2000-05-11	2000	I	NW	HOY LUNG SEAFOOD CORPORATION	NA	Original value in 'species' column: catesbeinana	Rana catesbeiana	Rana catesbeiana
2000765486	RACA	amphibian	Amphibia	Rana	catesbeiana	NA	NA	BULLFROG	MEA	19051	KG	105000	TW	TW	T	W	C	C	2000-05-11	2000	2000-05-11	2000	I	LA	BEAVER STREET FISHERIES, INC.	UNION DEVELOPMENT FROZEN FOODS CO LIMITED	Original value in 'species' column: catesbeinana	Rana catesbeiana	Rana catesbeiana
2000768434	RACA	amphibian	Amphibia	Rana	catesbeiana	NA	NA	BULLFROG	LIV	246	NO	450	MX	MX	T	W	C	C	2000-05-15	2000	2000-05-11	2000	I	MP	BIO CORPORATION	ARTURO BELTRAN	Original value in 'species' column: catesbeinana	Rana catesbeiana	Rana catesbeiana
2000768434	RAPI	amphibian	Amphibia	Rana	pipiens	NA	NORTHERN LEOPARD	FROG	LIV	1825	NO	960	MX	MX	T	W	C	C	2000-05-15	2000	2000-05-11	2000	I	MP	BIO CORPORATION	ARTURO BELTRAN	NA	Rana pipiens	Rana pipiens
2000168367	AGCL	amphibian	Amphibia	Agalychnis	callidryas	NA	RED-EYED TREE	FROG	LIV	150	NO	262	NI	NF	T	C	C	C	2000-05-12	2000	2000-05-12	2000	I	MI	NA	NA	NA	Agalychnis callidryas	Agalychnis callidryas
2000168398	AGCL	amphibian	Amphibia	Agalychnis	callidryas	NA	RED-EYED TREE	FROG	LIV	100	NO	600	NI	NI	T	W	C	C	2000-05-12	2000	2000-05-12	2000	I	MI	NA	ZOONICA S.A.	NA	Agalychnis callidryas	Agalychnis callidryas
2000727680	MAAU	amphibian	Amphibia	Mantella	aurantiaca	NA	MALAGASY GOLDEN	MANTELLA	LIV	5	NO	20	MG	MG	T	W	R	A	2000-05-12	2000	2000-05-12	2000	I	LA	INTERNATIONAL DRAGON BREEDERS INC	NA	NA	Mantella aurantiaca	Mantella aurantiaca
2000727680	MAAU	amphibian	Amphibia	Mantella	aurantiaca	NA	MALAGASY GOLDEN	MANTELLA	LIV	150	NO	600	MG	MG	T	W	C	C	2000-05-12	2000	2000-05-12	2000	I	LA	INTERNATIONAL DRAGON BREEDERS INC	NA	NA	Mantella aurantiaca	Mantella aurantiaca
2000727680	MANV	amphibian	Amphibia	Mantella	viridis	NA	GREEN GOLDEN	MANTELLA	LIV	20	NO	80	MG	MG	T	W	C	C	2000-05-12	2000	2000-05-12	2000	I	LA	INTERNATIONAL DRAGON BREEDERS INC	NA	NA	Mantella viridis	Mantella viridis
2000727680	MNLA	amphibian	Amphibia	Mantella	laevigata	NA	FOLOHY GOLDEN	MANTELLA	LIV	50	NO	200	MG	MG	T	W	C	C	2000-05-12	2000	2000-05-12	2000	I	LA	INTERNATIONAL DRAGON BREEDERS INC	NA	NA	Mantella laevigata	Mantella laevigata
2000727680	SCMR	amphibian	Amphibia	Scaphiophryne	marmorata	NA	MARBLED RAIN	FROG	LIV	50	NO	250	MG	MG	T	W	C	C	2000-05-12	2000	2000-05-12	2000	I	LA	INTERNATIONAL DRAGON BREEDERS INC	NA	NA	Scaphiophryne marmorata	Scaphiophryne marmorata
2000752579	RACA	amphibian	Amphibia	Rana	catesbeiana	NA	NA	BULLFROG	LIV	908	KG	580	DO	DO	T	C	C	C	2000-05-24	2000	2000-05-12	2000	I	NW	TIN TIN FISH TRADING INC.	LIVE FROGS	Original value in 'species' column: catesbeinana	Rana catesbeiana	Rana catesbeiana
2000754160	RACA	amphibian	Amphibia	Rana	catesbeiana	NA	NA	BULLFROG	LIV	1240	NO	361	DO	DO	T	W	C	C	2000-05-15	2000	2000-05-12	2000	I	NW	NORTH SEA TRADING CORPORATION	HECTOR ANT. TORO	Original value in 'species' column: catesbeinana	Rana catesbeiana	Rana catesbeiana
2000767895	HYMB	amphibian	Amphibia	Hymenochirus	boettgeri	NA	ZAIRE DWARF CLAWED	FROG	LIV	2000	NO	1022	HK	HK	T	W	C	C	2000-05-11	2000	2000-05-12	2000	I	AT	FINN'S AQUATICS INC.	FORTUNE WIDE ASIA	NA	Hymenochirus boettgeri	Hymenochirus boettgeri
2000837484	DYIN	amphibian	Amphibia	Dyscophus	insularis	NA	ANTSOUHY TOMATO	FROG	LIV	200	NO	800	MG	MG	T	U	C	C	2000-05-12	2000	2000-05-12	2000	I	MI	EMERALD CORAL & REPTILE	REPTILE TRADE OF MADAGASCAR	NA	Dyscophus insularis	Dyscophus insularis
2000759740	CYOR	amphibian	Amphibia	Cynops	orientalis	NA	CHINESE DWARF	NEWT	LIV	1000	NO	50	CN	CN	T	W	C	C	2000-05-13	2000	2000-05-13	2000	I	LA	Z IMPORTS INC.	XIAOSHAN IMPORT & EXPORT COMPANY	NA	Cynops orientalis	Cynops orientalis
2000760080	BOOR	amphibian	Amphibia	Bombina	orientalis	NA	ORIENTAL FIREBELLY	TOAD	LIV	10000	NO	3500	KR	KR	T	W	C	C	2000-05-13	2000	2000-05-13	2000	I	LA	GEO INTERNATIONAL	INTERPET KOREA	NA	Bombina orientalis	Bombina orientalis
2000762105	XELA	amphibian	Amphibia	Xenopus	laevis	NA	AFRICAN CLAWED	TOAD	LIV	600	NO	90	HK	HK	T	W	C	C	2000-05-15	2000	2000-05-13	2000	I	NY	TRANSSHIP DISCOUNTS LTD.	UNION TROPICAL FISH FARM	NA	Xenopus laevis	Xenopus laevis
2000752485	RACA	amphibian	Amphibia	Rana	catesbeiana	NA	NA	BULLFROG	LIV	5000	NO	459	DO	DO	T	C	C	C	2000-05-19	2000	2000-05-14	2000	I	NW	TIN TIN FISH TRADING INC.	LIFE FROGS	Original value in 'species' column: catesbeinana	Rana catesbeiana	Rana catesbeiana
2000757126	HYMC	amphibian	Amphibia	Hymenochirus	curtipes	NA	W. DWARF CLAWED	FROG	LIV	200	NO	90	SG	SG	T	W	C	C	2000-05-14	2000	2000-05-14	2000	I	LA	AQUACO, INC.	SUNRISE AQUARIUM PTE	NA	Hymenochirus curtipes	Hymenochirus curtipes
2000757445	BOOR	amphibian	Amphibia	Bombina	orientalis	NA	ORIENTAL FIREBELLY	TOAD	LIV	3000	NO	1191	CN	CN	T	W	C	C	2000-05-14	2000	2000-05-14	2000	I	LA	DOLPHIN INTERNATIONAL	SHANGHAI GOLDEN FIELD GARDENING COMPANY, LTD	NA	Bombina orientalis	Bombina orientalis
2000757445	CYOR	amphibian	Amphibia	Cynops	orientalis	NA	CHINESE DWARF	NEWT	LIV	4200	NO	425	CN	CN	T	W	C	C	2000-05-14	2000	2000-05-14	2000	I	LA	DOLPHIN INTERNATIONAL	SHANGHAI GOLDEN FIELD GARDENING COMPANY, LTD	NA	Cynops orientalis	Cynops orientalis
2000757445	PACB	amphibian	Amphibia	Pachytriton	brevipes	NA	TSITOU	NEWT	LIV	400	NO	174	CN	CN	T	W	C	C	2000-05-14	2000	2000-05-14	2000	I	LA	DOLPHIN INTERNATIONAL	SHANGHAI GOLDEN FIELD GARDENING COMPANY, LTD	NA	Pachytriton brevipes	Pachytriton brevipes
2000757463	OOLI	amphibian	Amphibia	Occidozyga	lima	NA	PADDY	FROG	LIV	1800	NO	72	ID	ID	T	W	C	C	2000-05-14	2000	2000-05-14	2000	I	LA	DOLPHIN INTERNATIONAL	VIVAJAYA INTERNATIONAL	Original value in 'genus' column: ooedozyga	Occidozyga lima	Occidozyga lima
2000757477	HYMC	amphibian	Amphibia	Hymenochirus	curtipes	NA	W. DWARF CLAWED	FROG	LIV	1350	NO	97	ID	ID	T	W	C	C	2000-05-14	2000	2000-05-14	2000	I	LA	DOLPHIN INTERNATIONAL	P.T. VIVARIA INDONESIA	NA	Hymenochirus curtipes	Hymenochirus curtipes
2000757477	OOLI	amphibian	Amphibia	Occidozyga	lima	NA	PADDY	FROG	LIV	750	NO	38	ID	ID	T	W	C	C	2000-05-14	2000	2000-05-14	2000	I	LA	DOLPHIN INTERNATIONAL	P.T. VIVARIA INDONESIA	Original value in 'genus' column: ooedozyga	Occidozyga lima	Occidozyga lima
2000757564	CYOR	amphibian	Amphibia	Cynops	orientalis	NA	CHINESE DWARF	NEWT	LIV	6300	NO	441	HK	HK	T	W	C	C	2000-05-14	2000	2000-05-14	2000	I	LA	DOLPHIN INTERNATIONAL	SANWOO FISHERIES	NA	Cynops orientalis	Cynops orientalis
2000757564	HYMC	amphibian	Amphibia	Hymenochirus	curtipes	NA	W. DWARF CLAWED	FROG	LIV	3360	NO	403	HK	HK	T	W	C	C	2000-05-14	2000	2000-05-14	2000	I	LA	DOLPHIN INTERNATIONAL	SANWOO FISHERIES	NA	Hymenochirus curtipes	Hymenochirus curtipes
2000757569	CYOR	amphibian	Amphibia	Cynops	orientalis	NA	CHINESE DWARF	NEWT	LIV	300	NO	105	HK	HK	T	W	C	C	2000-05-14	2000	2000-05-14	2000	I	LA	DOLPHIN INTERNATIONAL	UNION TROPICAL FISH FARM, LTD	NA	Cynops orientalis	Cynops orientalis
2000759156	HYMC	amphibian	Amphibia	Hymenochirus	curtipes	NA	W. DWARF CLAWED	FROG	LIV	3200	NO	704	HK	HK	T	W	C	C	2000-05-14	2000	2000-05-14	2000	I	LA	AQUACO, INC.	DRAGON FISHERIES	NA	Hymenochirus curtipes	Hymenochirus curtipes
2000759294	HYMB	amphibian	Amphibia	Hymenochirus	boettgeri	NA	ZAIRE DWARF CLAWED	FROG	LIV	250	NO	50	HK	HK	T	W	C	C	2000-05-14	2000	2000-05-14	2000	I	LA	TROPICAL ENTERPRISES	CEYLON AQUARIUM	NA	Hymenochirus boettgeri	Hymenochirus boettgeri
2000759981	HYMB	amphibian	Amphibia	Hymenochirus	boettgeri	NA	ZAIRE DWARF CLAWED	FROG	LIV	600	NO	166	HK	HK	T	W	C	C	2000-05-14	2000	2000-05-14	2000	I	LA	GLOBAL AQUATIC CONSULTING	BOKO EXPRESS COMPANY	NA	Hymenochirus boettgeri	Hymenochirus boettgeri
2000759989	HYMC	amphibian	Amphibia	Hymenochirus	curtipes	NA	W. DWARF CLAWED	FROG	LIV	1050	NO	420	SG	SG	T	W	C	C	2000-05-14	2000	2000-05-14	2000	I	LA	AQUA-NAUTIC SPECIALIST	AQUANAUTICS SPECIALIST PTE LTD	NA	Hymenochirus curtipes	Hymenochirus curtipes
2000760102	HYMC	amphibian	Amphibia	Hymenochirus	curtipes	NA	W. DWARF CLAWED	FROG	LIV	1400	NO	560	SG	SG	T	W	C	C	2000-05-14	2000	2000-05-14	2000	I	LA	AQUA-NAUTIC SPECIALIST	AQUANAUTICS SPECIALIST PTE LIMITED	NA	Hymenochirus curtipes	Hymenochirus curtipes
2000760916	RACA	amphibian	Amphibia	Rana	catesbeiana	NA	NA	BULLFROG	LIV	560	NO	161	DO	DO	T	C	C	C	2000-06-07	2000	2000-05-15	2000	I	NW	NORTH SEA TRADING CORPORATION	HECTOR ANT TORO	Original value in 'species' column: catesbeinana	Rana catesbeiana	Rana catesbeiana
2000770025	HEMM	amphibian	Amphibia	Hemisus	marmoratus	NA	MARBLED SHOVELNOSE	FROG	LIV	50	NO	37	TZ	TZ	T	W	C	C	2000-05-15	2000	2000-05-15	2000	I	LA	BRONX REPTILES INC	MOUNTAIN BIRDS & REPTILES	NA	Hemisus marmoratus	Hemisus marmoratus
2000770025	PBIF	amphibian	Amphibia	Phrynomantis	bifasciatus	NA	S AFR SNAKE-NECK	FROG	LIV	10	NO	7	TZ	TZ	T	W	C	C	2000-05-15	2000	2000-05-15	2000	I	LA	BRONX REPTILES INC	MOUNTAIN BIRDS & REPTILES	NA	Phrynomantis bifasciatus	Phrynomantis bifasciatus
2000794560	RABE	amphibian	Amphibia	Rana	berlandieri	NA	RIO GRANDE	FROG	LIV	400	KG	2583	MX	MX	T	W	C	C	2000-05-15	2000	2000-05-15	2000	I	BV	RANA LABORATORIES	MONTALVO ALVARO GARZA	NA	Rana berlandieri	Rana berlandieri
2000794601	RACA	amphibian	Amphibia	Rana	catesbeiana	NA	NA	BULLFROG	SPE	1140	NO	1650	MX	MX	T	W	C	C	2000-05-15	2000	2000-05-15	2000	I	NG	RANACO CORPORATION	P.A.M.E.E.S.A.	Original value in 'species' column: catesbeinana	Rana catesbeiana	Rana catesbeiana
2000794601	RAFO	amphibian	Amphibia	Rana	forreri	NA	FORRER'S GRASS	FROG	SPE	17870	NO	6660	MX	MX	T	W	C	C	2000-05-15	2000	2000-05-15	2000	I	NG	RANACO CORPORATION	P.A.M.E.E.S.A.	NA	Rana forreri	Rana forreri
2000754142	RACA	amphibian	Amphibia	Rana	catesbeiana	NA	NA	BULLFROG	LIV	1036	KG	1036	EC	EC	T	C	C	C	2000-05-22	2000	2000-05-16	2000	I	NW	KIN YICK TRADING CORPORATION	VIVACOE Y CIA	Original value in 'species' column: catesbeinana	Rana catesbeiana	Rana catesbeiana
2000768442	RACA	amphibian	Amphibia	Rana	catesbeiana	NA	NA	BULLFROG	LIV	292	NO	475	MX	MX	T	W	C	C	2000-05-16	2000	2000-05-16	2000	I	MP	BIO CORPORATION	ARTURO BELTRAN COL.	Original value in 'species' column: catesbeinana	Rana catesbeiana	Rana catesbeiana
2000768442	RAPI	amphibian	Amphibia	Rana	pipiens	NA	NORTHERN LEOPARD	FROG	LIV	1134	NO	605	MX	MX	T	W	C	C	2000-05-16	2000	2000-05-16	2000	I	MP	BIO CORPORATION	ARTURO BELTRAN COL.	NA	Rana pipiens	Rana pipiens
2000785537	AGCL	amphibian	Amphibia	Agalychnis	callidryas	NA	RED-EYED TREE	FROG	LIV	200	NO	2000	NI	NI	T	W	C	C	2000-05-16	2000	2000-05-16	2000	I	MI	BURGUNDY REPTILE TRADERS	NATURALEZA ANIMAL EXPORT SA	NA	Agalychnis callidryas	Agalychnis callidryas
2000758149	RMAC	amphibian	Amphibia	Rana	macrodon	NA	NA	BULLFROG	LEG	18370	NO	82740	ID	ID	T	W	C	C	2000-05-18	2000	2000-05-17	2000	I	LA	BEAVER STREET FISHERIES, INC.	P.T. SUMBER PANGAN NUSANTARA	NA	Rana macrodon	NA
2000759125	BUME	amphibian	Amphibia	Bufo	melanostictus	NA	BLACK-SPINED	TOAD	LIV	60	NO	27	TH	TH	T	W	C	C	2000-05-17	2000	2000-05-17	2000	I	LA	PETS INTERNATIONAL	ASIA WORLD WIDE IMPORT AND EXPORT	NA	Bufo melanostictus	Duttaphrynus melanostictus
2000759125	KALO	amphibian	Amphibia	Kaloula	pulchra	NA	ASIATIC PAINTED	FROG	LIV	275	NO	129	TH	TH	T	W	C	C	2000-05-17	2000	2000-05-17	2000	I	LA	PETS INTERNATIONAL	ASIA WORLD WIDE IMPORT AND EXPORT	NA	Kaloula pulchra	Kaloula pulchra
2000759125	RLEU	amphibian	Amphibia	Rhacophorus	leucomystax	NA	FLYING	FROG	LIV	75	NO	68	TH	TH	T	W	C	C	2000-05-17	2000	2000-05-17	2000	I	LA	PETS INTERNATIONAL	ASIA WORLD WIDE IMPORT AND EXPORT	NA	Rhacophorus leucomystax	NA
2000764248	HYMC	amphibian	Amphibia	Hymenochirus	curtipes	NA	W. DWARF CLAWED	FROG	LIV	2000	NO	220	HK	HK	T	U	C	C	2000-05-17	2000	2000-05-17	2000	I	TP	5-D TROPICAL, INC.	WUN FAT AQUARIUM	NA	Hymenochirus curtipes	Hymenochirus curtipes
2000769308	DYIN	amphibian	Amphibia	Dyscophus	insularis	NA	ANTSOUHY TOMATO	FROG	LIV	50	NO	350	MG	MG	T	W	C	C	2000-05-17	2000	2000-05-17	2000	I	LA	L. A. REPTILE	RAJAOFFERSON'S PETFARM	NA	Dyscophus insularis	Dyscophus insularis
2000769308	MAAU	amphibian	Amphibia	Mantella	aurantiaca	NA	MALAGASY GOLDEN	MANTELLA	LIV	100	NO	500	MG	MG	T	W	C	C	2000-05-17	2000	2000-05-17	2000	I	LA	L. A. REPTILE	RAJAOFFERSON'S PETFARM	NA	Mantella aurantiaca	Mantella aurantiaca
2000772846	GMAR	amphibian	Amphibia	Gastrotheca	marsupiata	NA	COMMON MARSUPIAL	FROG	LIV	302	NO	755	PE	PE	T	W	C	C	2000-05-17	2000	2000-05-17	2000	I	LA	L. A. REPTILE	REPTILE EXPORT	NA	Gastrotheca marsupiata	Gastrotheca marsupiata
2000773238	BUVI	amphibian	Amphibia	Bufo	viridis	NA	EUROPEAN GREEN	TOAD	LIV	500	NO	300	EG	EG	T	W	C	C	2000-05-17	2000	2000-05-17	2000	I	LA	L. A. REPTILE	OSAMA TOLBA	NA	Bufo viridis	NA
2000794562	RACA	amphibian	Amphibia	Rana	catesbeiana	NA	NA	BULLFROG	SPE	530	NO	759	MX	MX	T	W	C	C	2000-05-18	2000	2000-05-17	2000	I	NG	RANACO CORPORATION	P.A.M.E.E.S.A.	Original value in 'species' column: catesbeinana	Rana catesbeiana	Rana catesbeiana
2000794562	RAFO	amphibian	Amphibia	Rana	forreri	NA	FORRER'S GRASS	FROG	SPE	2665	NO	990	MX	MX	T	W	C	C	2000-05-18	2000	2000-05-17	2000	I	NG	RANACO CORPORATION	P.A.M.E.E.S.A.	NA	Rana forreri	Rana forreri
2000822023	CYOR	amphibian	Amphibia	Cynops	orientalis	NA	CHINESE DWARF	NEWT	LIV	500	NO	25	CN	CN	T	W	C	C	2000-05-24	2000	2000-05-17	2000	I	NY	MIN HUA ENTERPRISE, INC.	SHANGHAI ESWELL ENTERPRISE CO	NA	Cynops orientalis	Cynops orientalis
2000789588	RMAC	amphibian	Amphibia	Rana	macrodon	NA	NA	BULLFROG	LEG	19051	GM	78900	VN	VN	T	W	C	C	2000-05-18	2000	2000-05-18	2000	I	BO	INTEROCEAN INC.	CANTHO AGRICULTURAL & ANIMAL PROD IMEX CO.	NA	Rana macrodon	NA
2000794639	RABE	amphibian	Amphibia	Rana	berlandieri	NA	RIO GRANDE	FROG	LIV	350	KG	2206	MX	MX	T	W	C	C	2000-05-18	2000	2000-05-18	2000	I	BV	RANA LABORATORIES	MONTALVO ALVARO GARZA	NA	Rana berlandieri	Rana berlandieri
2000816201	RACA	amphibian	Amphibia	Rana	catesbeiana	NA	NA	BULLFROG	LIV	8000	NO	1000	BR	BR	T	C	C	C	2000-05-22	2000	2000-05-18	2000	I	NY	KIN YICK TRADING CORPORATION	RANGJAX IMPORT & EXPORT	Original value in 'species' column: catesbeinana	Rana catesbeiana	Rana catesbeiana
2000757472	CYOR	amphibian	Amphibia	Cynops	orientalis	NA	CHINESE DWARF	NEWT	LIV	12000	NO	240	CN	CN	T	W	C	C	2000-05-19	2000	2000-05-19	2000	I	LA	R. H. PET INCORPORATED	SAB FUQI IMPORT EXPORT CO LIMITED	NA	Cynops orientalis	Cynops orientalis
2000762183	RACA	amphibian	Amphibia	Rana	catesbeiana	NA	NA	BULLFROG	LIV	651	KG	459	DO	DO	T	C	C	C	2000-05-31	2000	2000-05-19	2000	I	NW	TIN TIN FISH TRADING INC.	LIVE FROGS	Original value in 'species' column: catesbeinana	Rana catesbeiana	Rana catesbeiana
2000759709	BOOR	amphibian	Amphibia	Bombina	orientalis	NA	ORIENTAL FIREBELLY	TOAD	LIV	8000	NO	2800	KR	KR	T	C	C	C	2000-05-20	2000	2000-05-20	2000	I	LA	GEO INTERNATIONAL	INTERPET KOREA	NA	Bombina orientalis	Bombina orientalis
2000769611	CYOR	amphibian	Amphibia	Cynops	orientalis	NA	CHINESE DWARF	NEWT	LIV	500	NO	25	CN	CN	T	W	C	C	2000-05-20	2000	2000-05-20	2000	I	LA	Z IMPORTS INC.	XIAOSHAN IMPORT & EXPORT COMPANY	NA	Cynops orientalis	Cynops orientalis
2000771740	CEGU	amphibian	Amphibia	Ceratobatrachus	guentheri	NA	GUNTHER'S TRIANGLE	FROG	LIV	120	NO	240	SB	SB	NA	W	C	C	2000-05-20	2000	2000-05-20	2000	I	LA	L. A. REPTILE	JINNEY ROBERT ETE	NA	Ceratobatrachus guentheri	NA
2000803973	MANB	amphibian	Amphibia	Mantella	betsileo	NA	BETSILEO GOLDEN	MANTELLA	LIV	50	NO	200	MG	MG	T	W	C	C	2000-06-08	2000	2000-05-20	2000	I	MI	GLOBAL TROPICAL REPTILES	LA FERME EXOTIQUE	NA	Mantella betsileo	Mantella betsileo
2000803973	MCOW	amphibian	Amphibia	Mantella	cowani	NA	BLACK GOLDEN	MANTELLA	LIV	50	NO	1400	MG	MG	T	W	C	C	2000-06-08	2000	2000-05-20	2000	I	MI	GLOBAL TROPICAL REPTILES	LA FERME EXOTIQUE	NA	Mantella cowani	NA
2000803973	SCMR	amphibian	Amphibia	Scaphiophryne	marmorata	NA	MARBLED RAIN	FROG	LIV	100	NO	250	MG	MG	T	W	C	C	2000-06-08	2000	2000-05-20	2000	I	MI	GLOBAL TROPICAL REPTILES	LA FERME EXOTIQUE	NA	Scaphiophryne marmorata	Scaphiophryne marmorata
2000803973	SPUS	amphibian	Amphibia	Scaphiophryne	pustulosa	NA	GREEN RAIN	FROG	LIV	50	NO	250	MG	MG	T	W	C	C	2000-06-08	2000	2000-05-20	2000	I	MI	GLOBAL TROPICAL REPTILES	LA FERME EXOTIQUE	NA	Scaphiophryne pustulosa	NA
2000807375	CYPY	amphibian	Amphibia	Cynops	pyrrhogaster	NA	JAPANESE FIREBELLY	NEWT	LIV	100	NO	55	HK	HK	T	W	C	C	2000-05-23	2000	2000-05-20	2000	I	NY	TRANSSHIP DISCOUNTS LTD.	UNION TROPICAL FISH FARM	NA	Cynops pyrrhogaster	Cynops pyrrhogaster
2000807375	XELA	amphibian	Amphibia	Xenopus	laevis	NA	AFRICAN CLAWED	TOAD	LIV	2900	NO	435	HK	HK	T	W	C	C	2000-05-23	2000	2000-05-20	2000	I	NY	TRANSSHIP DISCOUNTS LTD.	UNION TROPICAL FISH FARM	NA	Xenopus laevis	Xenopus laevis
2000814720	HYMC	amphibian	Amphibia	Hymenochirus	curtipes	NA	W. DWARF CLAWED	FROG	LIV	900	NO	190	HK	HK	T	W	C	C	2000-05-22	2000	2000-05-20	2000	I	NY	ERDA INC.	BROTHER AQUARIUM	NA	Hymenochirus curtipes	Hymenochirus curtipes
2000757253	HYMB	amphibian	Amphibia	Hymenochirus	boettgeri	NA	ZAIRE DWARF CLAWED	FROG	LIV	300	NO	42	HK	HK	T	C	C	C	2000-05-21	2000	2000-05-21	2000	I	LA	C.I.S. INTERNATIONAL	CEYLON AQUARIUM	NA	Hymenochirus boettgeri	Hymenochirus boettgeri
2000757352	HYMB	amphibian	Amphibia	Hymenochirus	boettgeri	NA	ZAIRE DWARF CLAWED	FROG	LIV	300	NO	33	HK	HK	T	W	C	C	2000-05-21	2000	2000-05-21	2000	I	LA	GLOBAL AQUATIC CONSULTING	BOKO EXPRESS COMPANY	NA	Hymenochirus boettgeri	Hymenochirus boettgeri
2000757454	HYMC	amphibian	Amphibia	Hymenochirus	curtipes	NA	W. DWARF CLAWED	FROG	LIV	1050	NO	420	SG	SG	T	W	C	C	2000-05-21	2000	2000-05-21	2000	I	LA	AQUA-NAUTIC SPECIALIST	AQUANAUTICS SPECIALIST PTE LIMITED	NA	Hymenochirus curtipes	Hymenochirus curtipes
2000758058	HYMC	amphibian	Amphibia	Hymenochirus	curtipes	NA	W. DWARF CLAWED	FROG	LIV	1400	NO	560	SG	SG	T	C	C	C	2000-05-21	2000	2000-05-21	2000	I	LA	AQUA-NAUTIC SPECIALIST	AQUANAUTICS SPECIALIST PTE LTD	NA	Hymenochirus curtipes	Hymenochirus curtipes
2000758071	BUME	amphibian	Amphibia	Bufo	melanostictus	NA	BLACK-SPINED	TOAD	LIV	120	NO	48	VN	VN	T	W	C	C	2000-05-21	2000	2000-05-21	2000	I	LA	UNIVERSAL AQUATIC	CORIMEX	NA	Bufo melanostictus	Duttaphrynus melanostictus
2000758071	KALO	amphibian	Amphibia	Kaloula	pulchra	NA	ASIATIC PAINTED	FROG	LIV	278	NO	111	VN	VN	T	W	C	C	2000-05-21	2000	2000-05-21	2000	I	LA	UNIVERSAL AQUATIC	CORIMEX	NA	Kaloula pulchra	Kaloula pulchra
2000758071	OOLI	amphibian	Amphibia	Occidozyga	lima	NA	PADDY	FROG	LIV	70	NO	7	VN	VN	T	W	C	C	2000-05-21	2000	2000-05-21	2000	I	LA	UNIVERSAL AQUATIC	CORIMEX	Original value in 'genus' column: ooedozyga	Occidozyga lima	Occidozyga lima
2000758071	RLEU	amphibian	Amphibia	Rhacophorus	leucomystax	NA	FLYING	FROG	LIV	265	NO	106	VN	VN	T	W	C	C	2000-05-21	2000	2000-05-21	2000	I	LA	UNIVERSAL AQUATIC	CORIMEX	NA	Rhacophorus leucomystax	NA
2000759360	HYMB	amphibian	Amphibia	Hymenochirus	boettgeri	NA	ZAIRE DWARF CLAWED	FROG	LIV	125	NO	25	HK	HK	T	W	C	C	2000-05-21	2000	2000-05-21	2000	I	LA	TROPICAL ENTERPRISES	CEYLON AQUARIUM	NA	Hymenochirus boettgeri	Hymenochirus boettgeri
2000759384	CYOR	amphibian	Amphibia	Cynops	orientalis	NA	CHINESE DWARF	NEWT	LIV	28	NO	34	SG	SG	T	W	C	C	2000-05-21	2000	2000-05-21	2000	I	LA	PET-SIAM INTERNATIONAL	OLYMPIA AQUARIUM	NA	Cynops orientalis	Cynops orientalis
2000759543	HYMC	amphibian	Amphibia	Hymenochirus	curtipes	NA	W. DWARF CLAWED	FROG	LIV	2000	NO	460	HK	HK	T	W	C	C	2000-05-21	2000	2000-05-21	2000	I	LA	AQUACO, INC.	DRAGON FISHERIES	NA	Hymenochirus curtipes	Hymenochirus curtipes
2000759617	HYMC	amphibian	Amphibia	Hymenochirus	curtipes	NA	W. DWARF CLAWED	FROG	LIV	150	NO	60	SG	SG	T	C	C	C	2000-05-21	2000	2000-05-21	2000	I	LA	AQUACO, INC.	SUNRISE AQUARIUM PTE LTD	NA	Hymenochirus curtipes	Hymenochirus curtipes
2000759830	CYOR	amphibian	Amphibia	Cynops	orientalis	NA	CHINESE DWARF	NEWT	LIV	4480	NO	410	CN	CN	T	W	C	C	2000-05-21	2000	2000-05-21	2000	I	LA	DOLPHIN INTERNATIONAL	SHANGAI GOLDEN FIELD GARDENING CO LTD	NA	Cynops orientalis	Cynops orientalis
2000759830	PACB	amphibian	Amphibia	Pachytriton	brevipes	NA	TSITOU	NEWT	LIV	400	NO	166	CN	CN	T	W	C	C	2000-05-21	2000	2000-05-21	2000	I	LA	DOLPHIN INTERNATIONAL	SHANGAI GOLDEN FIELD GARDENING CO LTD	NA	Pachytriton brevipes	Pachytriton brevipes
2000759839	CYOR	amphibian	Amphibia	Cynops	orientalis	NA	CHINESE DWARF	NEWT	LIV	4200	NO	294	CN	HK	T	W	C	C	2000-05-21	2000	2000-05-21	2000	I	LA	DOLPHIN INTERNATIONAL	SANWOO FISHERIES	NA	Cynops orientalis	Cynops orientalis
2000759839	HYMC	amphibian	Amphibia	Hymenochirus	curtipes	NA	W. DWARF CLAWED	FROG	LIV	3640	NO	437	HK	HK	T	C	C	C	2000-05-21	2000	2000-05-21	2000	I	LA	DOLPHIN INTERNATIONAL	SANWOO FISHERIES	NA	Hymenochirus curtipes	Hymenochirus curtipes
2000759842	LICA	amphibian	Amphibia	Litoria	caerulea	NA	WHITE'S TREE	FROG	LIV	25	NO	20	ID	ID	T	W	C	C	2000-05-21	2000	2000-05-21	2000	I	LA	DOLPHIN INTERNATIONAL	VIVAJAYA INTERNATIONAL	NA	Litoria caerulea	Litoria caerulea
2000759842	OOLI	amphibian	Amphibia	Occidozyga	lima	NA	PADDY	FROG	LIV	750	NO	30	ID	ID	T	W	C	C	2000-05-21	2000	2000-05-21	2000	I	LA	DOLPHIN INTERNATIONAL	VIVAJAYA INTERNATIONAL	Original value in 'genus' column: ooedozyga	Occidozyga lima	Occidozyga lima
2000759845	HYMC	amphibian	Amphibia	Hymenochirus	curtipes	NA	W. DWARF CLAWED	FROG	LIV	3300	NO	204	ID	ID	T	W	C	C	2000-05-21	2000	2000-05-21	2000	I	LA	DOLPHIN INTERNATIONAL	PT VIVARIA INDONESIA	NA	Hymenochirus curtipes	Hymenochirus curtipes
2000759845	LICA	amphibian	Amphibia	Litoria	caerulea	NA	WHITE'S TREE	FROG	LIV	285	NO	456	ID	ID	T	W	C	C	2000-05-21	2000	2000-05-21	2000	I	LA	DOLPHIN INTERNATIONAL	PT VIVARIA INDONESIA	NA	Litoria caerulea	Litoria caerulea
2000759845	OOLI	amphibian	Amphibia	Occidozyga	lima	NA	PADDY	FROG	LIV	450	NO	23	ID	ID	T	W	C	C	2000-05-21	2000	2000-05-21	2000	I	LA	DOLPHIN INTERNATIONAL	PT VIVARIA INDONESIA	Original value in 'genus' column: ooedozyga	Occidozyga lima	Occidozyga lima
2000762174	RACA	amphibian	Amphibia	Rana	catesbeiana	NA	NA	BULLFROG	LIV	1030	KG	301	DO	DO	T	C	C	C	2000-05-31	2000	2000-05-21	2000	I	NW	TIN TIN FISH TRADING INC.	LIVE FROGS	Original value in 'species' column: catesbeinana	Rana catesbeiana	Rana catesbeiana
2000764035	OOLI	amphibian	Amphibia	Occidozyga	lima	NA	PADDY	FROG	LIV	600	NO	54	ID	ID	T	W	C	C	2000-05-23	2000	2000-05-21	2000	I	NY	TRANSSHIP DISCOUNTS LTD.	VIVAJAYA INTERNATIONAL	Original value in 'genus' column: ooedozyga	Occidozyga lima	Occidozyga lima
2000770208	HYMC	amphibian	Amphibia	Hymenochirus	curtipes	NA	W. DWARF CLAWED	FROG	LIV	980	NO	1470	ID	ID	T	W	C	C	2000-05-21	2000	2000-05-21	2000	I	LA	AQUA-NAUTIC SPECIALIST	PT. BEKAEL ESKA GEMILANG	NA	Hymenochirus curtipes	Hymenochirus curtipes
2000788718	RACA	amphibian	Amphibia	Rana	catesbeiana	NA	NA	BULLFROG	LIV	5000	NO	968	DO	DO	T	C	C	C	2000-08-29	2000	2000-05-21	2000	I	NW	KIN YICK TRADING CORPORATION	ASSOCIATION PRODUCTORES DE RANAS	Original value in 'species' column: catesbeinana	Rana catesbeiana	Rana catesbeiana
2000256999	PYAD	amphibian	Amphibia	Pyxicephalus	adspersus	NA	TSCHUDI'S AFRICAN	BULLFROG	LIV	200	NO	500	TZ	TZ	T	W	C	C	2000-05-23	2000	2000-05-22	2000	I	MI	GLOBAL TROPICAL IMPORT/EXPORTS	GRECHANT TANZANIA LIMITED	NA	Pyxicephalus adspersus	Pyxicephalus adspersus
2000763857	RACA	amphibian	Amphibia	Rana	catesbeiana	NA	NA	BULLFROG	LIV	1000	NO	1000	BR	BR	T	W	C	C	2000-05-22	2000	2000-05-22	2000	I	NY	KIN YICK TRADING	RANAJAX IMPORT AND EXPORT	Original value in 'species' column: catesbeinana	Rana catesbeiana	Rana catesbeiana
2000771733	AGCL	amphibian	Amphibia	Agalychnis	callidryas	NA	RED-EYED TREE	FROG	LIV	100	NO	175	NI	NI	NA	C	C	C	2000-05-23	2000	2000-05-22	2000	I	LA	L. A. REPTILE	EXPASA	NA	Agalychnis callidryas	Agalychnis callidryas
2000794630	RABE	amphibian	Amphibia	Rana	berlandieri	NA	RIO GRANDE	FROG	LIV	300	KG	1937	MX	MX	T	W	C	C	2000-05-22	2000	2000-05-22	2000	I	BV	RANA LABORATORIES	MONTALVO ALVARO GARZA	NA	Rana berlandieri	Rana berlandieri
2000794630	RAPI	amphibian	Amphibia	Rana	pipiens	NA	NORTHERN LEOPARD	FROG	LIV	300	KG	1937	MX	MX	T	W	C	C	2000-05-22	2000	2000-05-22	2000	I	BV	RANA LABORATORIES	MONTALVO ALVARO GARZA	NA	Rana pipiens	Rana pipiens
2000763640	RACA	amphibian	Amphibia	Rana	catesbeiana	NA	NA	BULLFROG	LPS	5	NO	1239	ID	IT	T	W	C	C	2000-05-24	2000	2000-05-23	2000	I	NY	PRADA USA CORP.	I PELLETTIERI D'ITALIA S.P.A.	Original value in 'species' column: catesbeinana	Rana catesbeiana	Rana catesbeiana
2000763640	RACA	amphibian	Amphibia	Rana	catesbeiana	NA	NA	BULLFROG	LPS	7	NO	1272	ZA	IT	T	W	C	C	2000-05-24	2000	2000-05-23	2000	I	NY	PRADA USA CORP.	I PELLETTIERI D'ITALIA S.P.A.	Original value in 'species' column: catesbeinana	Rana catesbeiana	Rana catesbeiana
2000763990	RMAC	amphibian	Amphibia	Rana	macrodon	NA	NA	BULLFROG	SHO	10	NO	233	ID	IT	T	W	C	C	2000-05-24	2000	2000-05-23	2000	I	NY	PRADA USA CORP.	I PELLETTIERI D'ITALIA SPA	NA	Rana macrodon	NA
2000771464	ANCT	amphibian	Amphibia	NA	NA	NA	NON-CITES	AMPHIBIANS	LIV	200	NO	60	VN	VN	T	W	C	C	2000-05-23	2000	2000-05-23	2000	I	LA	CALIFORNIA ZOOLOGICAL SUPPLY	VINAFOR HANOI	NA	Na na	NA
2000771464	KALO	amphibian	Amphibia	Kaloula	pulchra	NA	ASIATIC PAINTED	FROG	LIV	100	NO	30	VN	VN	T	W	C	C	2000-05-23	2000	2000-05-23	2000	I	LA	CALIFORNIA ZOOLOGICAL SUPPLY	VINAFOR HANOI	NA	Kaloula pulchra	Kaloula pulchra
2000782398	RACA	amphibian	Amphibia	Rana	catesbeiana	NA	NA	BULLFROG	LIV	2970	NO	5139	GT	GT	T	U	C	C	2000-05-23	2000	2000-05-23	2000	I	MI	AQUALAND, INC.	PRODUCTOS AGRICOLAS DE GUATEMALA	Original value in 'species' column: catesbeinana	Rana catesbeiana	Rana catesbeiana
2000788947	RACA	amphibian	Amphibia	Rana	catesbeiana	NA	NA	BULLFROG	LIV	852	NO	249	DO	DO	T	C	C	C	2000-08-29	2000	2000-05-23	2000	I	NW	NORTH SEA TRADING CORPORATION	HECTOR ANT. TORO	Original value in 'species' column: catesbeinana	Rana catesbeiana	Rana catesbeiana
2000764347	RMAC	amphibian	Amphibia	Rana	macrodon	NA	NA	BULLFROG	LPL	4	NO	385	ID	IT	T	W	C	C	2000-05-25	2000	2000-05-24	2000	I	NY	PRADA USA CORP.	I PELLETTIERI D'ITALIA SPA	NA	Rana macrodon	NA
2000771131	MENA	amphibian	Amphibia	Megophrys	nasuta	NA	SPADEFOOT	TOAD	LIV	41	NO	246	ID	ID	T	W	C	C	2000-05-24	2000	2000-05-24	2000	I	LA	L. A. REPTILE	FIRMA HASCO	NA	Megophrys nasuta	Pelobatrachus nasuta
2000777681	BOOR	amphibian	Amphibia	Bombina	orientalis	NA	ORIENTAL FIREBELLY	TOAD	LIV	600	NO	30	CN	CN	T	W	C	C	2000-05-31	2000	2000-05-24	2000	I	NY	MIN HUA ENTERPRISE, INC.	SHANGHAI ESWELL ENTERPRISES	NA	Bombina orientalis	Bombina orientalis
2000777681	CYOR	amphibian	Amphibia	Cynops	orientalis	NA	CHINESE DWARF	NEWT	LIV	800	NO	20	CN	CN	T	W	C	C	2000-05-31	2000	2000-05-24	2000	I	NY	MIN HUA ENTERPRISE, INC.	SHANGHAI ESWELL ENTERPRISES	NA	Cynops orientalis	Cynops orientalis
2000789006	RACA	amphibian	Amphibia	Rana	catesbeiana	NA	NA	BULLFROG	LIV	5000	NO	275	DO	DO	T	C	C	C	2000-08-22	2000	2000-05-24	2000	I	NW	TIN TIN FISH TRADING INC.	LIVE FROGGS	Original value in 'species' column: catesbeinana	Rana catesbeiana	Rana catesbeiana
2000789420	RACA	amphibian	Amphibia	Rana	catesbeiana	NA	NA	BULLFROG	LIV	5000	NO	275	DO	DO	T	C	C	C	2000-08-30	2000	2000-05-24	2000	I	NW	TIN TIN FISH TRADING INC.	LIVE FROGS	Original value in 'species' column: catesbeinana	Rana catesbeiana	Rana catesbeiana
2000789558	XELA	amphibian	Amphibia	Xenopus	laevis	NA	AFRICAN CLAWED	TOAD	LIV	12	NO	750	CH	CH	M	C	C	C	2000-05-24	2000	2000-05-24	2000	I	BO	UNIVERSITY OF ROCHESTER	BASEL INSTITUTE OF IMMUNOLOGY	NA	Xenopus laevis	Xenopus laevis
2000821083	HYMC	amphibian	Amphibia	Hymenochirus	curtipes	NA	W. DWARF CLAWED	FROG	LIV	2000	NO	220	HK	HK	T	U	C	C	2000-05-24	2000	2000-05-24	2000	I	TP	5-D TROPICAL, INC.	WUN FAT AQUARIUM	NA	Hymenochirus curtipes	Hymenochirus curtipes
2000900433	AFFO	amphibian	Amphibia	Afrixalus	fornasini	NA	SILVER-BAND BANANA	FROG	LIV	9	NO	36	KE	CA	T	U	C	C	2000-05-24	2000	2000-05-24	2000	I	MI	GLADES HERP, INC.	GLOBAL EXOTIC PETS	Original value in 'genus' column: afrilaxus	Afrixalus fornasini	Afrixalus fornasini
2000781969	KALO	amphibian	Amphibia	Kaloula	pulchra	NA	ASIATIC PAINTED	FROG	LIV	460	NO	290	VN	VN	T	U	C	C	2000-05-25	2000	2000-05-25	2000	I	MI	GAMA SUPPLIERS, INC.	VINAFOR HANOI	NA	Kaloula pulchra	Kaloula pulchra
2000788720	RACA	amphibian	Amphibia	Rana	catesbeiana	NA	NA	BULLFROG	LIV	1188	NO	347	DO	DO	T	C	C	C	2000-08-29	2000	2000-05-25	2000	I	NW	NORTH SEA TRADING CORPORATION	HECTOR ANT. TORO	Original value in 'species' column: catesbeinana	Rana catesbeiana	Rana catesbeiana
2000793171	RACA	amphibian	Amphibia	Rana	catesbeiana	NA	NA	BULLFROG	LIV	945	KG	945	EC	EC	T	C	C	C	2000-05-25	2000	2000-05-25	2000	I	NW	HOY LUNG SEAFOOD CORPORATION	JUAN PABLO VILLACRES	Original value in 'species' column: catesbeinana	Rana catesbeiana	Rana catesbeiana
2000257095	BMAR	amphibian	Amphibia	Bufo	marinus	NA	NEOTROPICAL	TOAD	LIV	22	NO	550	GY	GY	T	W	C	C	2000-05-26	2000	2000-05-26	2000	I	MI	GLOBAL TROPICAL REPTILES	NA	NA	Bufo marinus	NA
2000257106	DYIN	amphibian	Amphibia	Dyscophus	insularis	NA	ANTSOUHY TOMATO	FROG	LIV	40	NO	100	MG	MG	T	W	C	C	2000-05-31	2000	2000-05-26	2000	I	MI	GLOBAL TROPICAL REPTILES	SOCIETE FAUNA EXPORT	NA	Dyscophus insularis	Dyscophus insularis
2000257106	MAAU	amphibian	Amphibia	Mantella	aurantiaca	NA	MALAGASY GOLDEN	MANTELLA	LIV	100	NO	300	MG	MG	T	W	C	C	2000-05-31	2000	2000-05-26	2000	I	MI	GLOBAL TROPICAL REPTILES	SOCIETE FAUNA EXPORT	NA	Mantella aurantiaca	Mantella aurantiaca
2000257106	MAAU	amphibian	Amphibia	Mantella	aurantiaca	NA	MALAGASY GOLDEN	MANTELLA	LIV	100	NO	300	MG	MG	T	W	C	C	2000-05-31	2000	2000-05-26	2000	I	MI	GLOBAL TROPICAL REPTILES	SOCIETE FAUNA EXPORT	NA	Mantella aurantiaca	Mantella aurantiaca
2000257106	MANV	amphibian	Amphibia	Mantella	viridis	NA	GREEN GOLDEN	MANTELLA	LIV	70	NO	300	MG	MG	T	W	C	C	2000-05-31	2000	2000-05-26	2000	I	MI	GLOBAL TROPICAL REPTILES	SOCIETE FAUNA EXPORT	NA	Mantella viridis	Mantella viridis
2000257106	MMAD	amphibian	Amphibia	Mantella	madagascariensis	NA	MADAGASCAR GOLDEN	MANTELLA	LIV	120	NO	450	MG	MG	T	W	C	C	2000-05-31	2000	2000-05-26	2000	I	MI	GLOBAL TROPICAL REPTILES	SOCIETE FAUNA EXPORT	NA	Mantella madagascariensis	Mantella madagascariensis
2000257106	MPLC	amphibian	Amphibia	Mantella	pulchra	NA	PARKER'S GOLDEN	MANTELLA	LIV	40	NO	150	MG	MG	T	W	C	C	2000-05-31	2000	2000-05-26	2000	I	MI	GLOBAL TROPICAL REPTILES	SOCIETE FAUNA EXPORT	NA	Mantella pulchra	Mantella pulchra
2000257106	SCMR	amphibian	Amphibia	Scaphiophryne	marmorata	NA	MARBLED RAIN	FROG	LIV	30	NO	200	MG	MG	T	W	C	C	2000-05-31	2000	2000-05-26	2000	I	MI	GLOBAL TROPICAL REPTILES	SOCIETE FAUNA EXPORT	NA	Scaphiophryne marmorata	Scaphiophryne marmorata
2000257106	SPUS	amphibian	Amphibia	Scaphiophryne	pustulosa	NA	GREEN RAIN	FROG	LIV	35	NO	200	MG	MG	T	W	C	C	2000-05-31	2000	2000-05-26	2000	I	MI	GLOBAL TROPICAL REPTILES	SOCIETE FAUNA EXPORT	NA	Scaphiophryne pustulosa	NA
2000760898	RACA	amphibian	Amphibia	Rana	catesbeiana	NA	NA	BULLFROG	LIV	700	KG	900	EC	EC	T	C	C	C	2000-06-07	2000	2000-05-26	2000	I	NW	KIN YICK TRADING CORPORATION	VIVACOCE Y CIA	Original value in 'species' column: catesbeinana	Rana catesbeiana	Rana catesbeiana
2000785354	RACA	amphibian	Amphibia	Rana	catesbeiana	NA	NA	BULLFROG	LIV	1000	KG	1000	BR	BR	T	W	C	C	2000-05-31	2000	2000-05-26	2000	I	NY	KIN YICK TRADING CORPORATION	RAMAJAX IMPORT & EXPORT	Original value in 'species' column: catesbeinana	Rana catesbeiana	Rana catesbeiana
2000794563	BMAR	amphibian	Amphibia	Bufo	marinus	NA	NEOTROPICAL	TOAD	SPE	5	NO	3	US	MX	T	W	C	C	2000-05-26	2000	2000-05-26	2000	I	NG	RANACO CORPORATION	P.A.M.E.E.E.S.A.	NA	Bufo marinus	NA
2000794563	RACA	amphibian	Amphibia	Rana	catesbeiana	NA	NA	BULLFROG	SPE	60	NO	154	MX	MX	T	W	C	C	2000-05-26	2000	2000-05-26	2000	I	NG	RANACO CORPORATION	P.A.M.E.E.E.S.A.	Original value in 'species' column: catesbeinana	Rana catesbeiana	Rana catesbeiana
2000794563	RAFO	amphibian	Amphibia	Rana	forreri	NA	FORRER'S GRASS	FROG	SPE	8820	NO	4320	MX	MX	T	W	C	C	2000-05-26	2000	2000-05-26	2000	I	NG	RANACO CORPORATION	P.A.M.E.E.E.S.A.	NA	Rana forreri	Rana forreri
2000758005	ANCT	amphibian	Amphibia	NA	NA	NA	NON-CITES	AMPHIBIANS	LIV	2420	NO	0	HK	HK	T	W	C	C	2000-05-30	2000	2000-05-27	2000	I	NY	TRANSSHIP DISCOUNTS LTD.	UNION TROPICAL FISH FARM	NA	Na na	NA
2000788921	RACA	amphibian	Amphibia	Rana	catesbeiana	NA	NA	BULLFROG	LIV	1392	NO	400	DO	DO	T	C	C	C	2000-05-27	2000	2000-05-27	2000	I	NW	NORTH SEA TRADING CORPORATION	HECTOR ANT.	Original value in 'species' column: catesbeinana	Rana catesbeiana	Rana catesbeiana
2000789216	RACA	amphibian	Amphibia	Rana	catesbeiana	NA	NA	BULLFROG	LIV	5000	NO	560	DO	DO	T	C	C	C	2000-08-30	2000	2000-05-27	2000	I	NW	TIN TIN FISH TRADING INC.	LIVE FROGSS	Original value in 'species' column: catesbeinana	Rana catesbeiana	Rana catesbeiana
2000789286	RACA	amphibian	Amphibia	Rana	catesbeiana	NA	NA	BULLFROG	LIV	1392	NO	406	DO	DO	T	C	C	C	2000-08-29	2000	2000-05-27	2000	I	NW	NORTH SEA TRADING CORPORATION	HECTOR ANT TORO	Original value in 'species' column: catesbeinana	Rana catesbeiana	Rana catesbeiana
2000257102	DETI	amphibian	Amphibia	Dendrobates	tinctorius	NA	DYEING	POISON-ARROW FROG	LIV	25	NO	500	SR	SR	T	W	C	C	2000-05-31	2000	2000-05-28	2000	I	MI	GAMA SUPPLIERS, INC.	FANNAS PET SHOP	NA	Dendrobates tinctorius	Dendrobates tinctorius
2000257102	DETI	amphibian	Amphibia	Dendrobates	tinctorius	NA	DYEING	POISON-ARROW FROG	LIV	50	NO	175	SR	SR	T	W	C	C	2000-05-31	2000	2000-05-28	2000	I	MI	GAMA SUPPLIERS, INC.	FANNAS PET SHOP	NA	Dendrobates tinctorius	Dendrobates tinctorius
2000257102	DTRV	amphibian	Amphibia	Epipedobates	trivittatus	NA	THREE-STRIPED	POISON-ARROW FROG	LIV	20	NO	220	SR	SR	T	W	C	C	2000-05-31	2000	2000-05-28	2000	I	MI	GAMA SUPPLIERS, INC.	FANNAS PET SHOP	NA	Epipedobates trivittatus	Ameerega trivittata
2000759282	BOOR	amphibian	Amphibia	Bombina	orientalis	NA	ORIENTAL FIREBELLY	TOAD	LIV	50	NO	38	HK	HK	T	W	C	C	2000-05-28	2000	2000-05-28	2000	I	LA	CIS INTL	CEYLON AQUARIUM	NA	Bombina orientalis	Bombina orientalis
2000759291	HYMC	amphibian	Amphibia	Hymenochirus	curtipes	NA	W. DWARF CLAWED	FROG	LIV	1400	NO	560	SG	SG	T	W	C	C	2000-05-28	2000	2000-05-28	2000	I	LA	AQUA-NAUTIC SPECIALIST	AQUANAUTICS SPECIALIST PTE LIMITED	NA	Hymenochirus curtipes	Hymenochirus curtipes
2000773750	LICA	amphibian	Amphibia	Litoria	caerulea	NA	WHITE'S TREE	FROG	LIV	25	NO	20	ID	ID	T	W	C	C	2000-05-28	2000	2000-05-28	2000	I	LA	DOLPHIN INTERNATIONAL	VIVAJAYA INTERNATIONAL	NA	Litoria caerulea	Litoria caerulea
2000773750	OOLI	amphibian	Amphibia	Occidozyga	lima	NA	PADDY	FROG	LIV	450	NO	18	ID	ID	T	W	C	C	2000-05-28	2000	2000-05-28	2000	I	LA	DOLPHIN INTERNATIONAL	VIVAJAYA INTERNATIONAL	Original value in 'genus' column: ooedozyga	Occidozyga lima	Occidozyga lima
2000773751	HYMC	amphibian	Amphibia	Hymenochirus	curtipes	NA	W. DWARF CLAWED	FROG	LIV	600	NO	36	ID	ID	T	W	C	C	2000-05-28	2000	2000-05-28	2000	I	LA	DOLPHIN INTERNATIONAL	P.T. VIVARIA INDONESIA	NA	Hymenochirus curtipes	Hymenochirus curtipes
2000773751	LICA	amphibian	Amphibia	Litoria	caerulea	NA	WHITE'S TREE	FROG	LIV	450	NO	23	ID	ID	T	W	C	C	2000-05-28	2000	2000-05-28	2000	I	LA	DOLPHIN INTERNATIONAL	P.T. VIVARIA INDONESIA	NA	Litoria caerulea	Litoria caerulea
2000773751	OOLI	amphibian	Amphibia	Occidozyga	lima	NA	PADDY	FROG	LIV	80	NO	160	ID	ID	T	W	C	C	2000-05-28	2000	2000-05-28	2000	I	LA	DOLPHIN INTERNATIONAL	P.T. VIVARIA INDONESIA	Original value in 'genus' column: ooedozyga	Occidozyga lima	Occidozyga lima
2000773794	CYOR	amphibian	Amphibia	Cynops	orientalis	NA	CHINESE DWARF	NEWT	LIV	1150	NO	173	HK	HK	T	W	C	C	2000-05-28	2000	2000-05-28	2000	I	LA	DOLPHIN INTERNATIONAL	SANWOO FISHERIES	NA	Cynops orientalis	Cynops orientalis
2000773794	HYMC	amphibian	Amphibia	Hymenochirus	curtipes	NA	W. DWARF CLAWED	FROG	LIV	2240	NO	269	HK	HK	T	W	C	C	2000-05-28	2000	2000-05-28	2000	I	LA	DOLPHIN INTERNATIONAL	SANWOO FISHERIES	NA	Hymenochirus curtipes	Hymenochirus curtipes
2000773816	ANCT	amphibian	Amphibia	NA	NA	NA	NON-CITES	AMPHIBIANS	LIV	100	NO	42	CN	CN	T	W	C	C	2000-05-28	2000	2000-05-28	2000	I	LA	DOLPHIN INTERNATIONAL	SHANGAI GOLDEN FIELD GARDENING COMPANY LTD	NA	Na na	NA
2000773816	BOOR	amphibian	Amphibia	Bombina	orientalis	NA	ORIENTAL FIREBELLY	TOAD	LIV	700	NO	253	CN	CN	T	W	C	C	2000-05-28	2000	2000-05-28	2000	I	LA	DOLPHIN INTERNATIONAL	SHANGAI GOLDEN FIELD GARDENING COMPANY LTD	NA	Bombina orientalis	Bombina orientalis
2000773816	CYOR	amphibian	Amphibia	Cynops	orientalis	NA	CHINESE DWARF	NEWT	LIV	5700	NO	553	CN	CN	T	W	C	C	2000-05-28	2000	2000-05-28	2000	I	LA	DOLPHIN INTERNATIONAL	SHANGAI GOLDEN FIELD GARDENING COMPANY LTD	NA	Cynops orientalis	Cynops orientalis
2000774435	HYMC	amphibian	Amphibia	Hymenochirus	curtipes	NA	W. DWARF CLAWED	FROG	LIV	4800	NO	1056	HK	HK	T	W	C	C	2000-05-28	2000	2000-05-28	2000	I	LA	AQUACO, INC.	DRAGON FISHERIES	NA	Hymenochirus curtipes	Hymenochirus curtipes
2000257009	ANCT	amphibian	Amphibia	NA	NA	NA	NON-CITES	AMPHIBIANS	LIV	50	NO	15	TZ	TZ	T	W	C	C	2000-06-09	2000	2000-05-29	2000	I	MI	GLOBAL TROPICAL IMPORT/ EXPORTS	GRECHANT TANZANIA LIMITED	NA	Na na	NA
2000257009	CHIX	amphibian	Amphibia	Chiromantis	xerapelina	NA	AFRICAN GRAY TREE	FROG	LIV	50	NO	30	TZ	TZ	T	W	C	C	2000-06-09	2000	2000-05-29	2000	I	MI	GLOBAL TROPICAL IMPORT/ EXPORTS	GRECHANT TANZANIA LIMITED	NA	Chiromantis xerapelina	NA
2000257009	HEMM	amphibian	Amphibia	Hemisus	marmoratus	NA	MARBLED SHOVELNOSE	FROG	LIV	100	NO	50	TZ	TZ	T	W	C	C	2000-06-09	2000	2000-05-29	2000	I	MI	GLOBAL TROPICAL IMPORT/ EXPORTS	GRECHANT TANZANIA LIMITED	NA	Hemisus marmoratus	Hemisus marmoratus
2000257009	PYAD	amphibian	Amphibia	Pyxicephalus	adspersus	NA	TSCHUDI'S AFRICAN	BULLFROG	LIV	100	NO	100	TZ	TZ	T	W	C	C	2000-06-09	2000	2000-05-29	2000	I	MI	GLOBAL TROPICAL IMPORT/ EXPORTS	GRECHANT TANZANIA LIMITED	NA	Pyxicephalus adspersus	Pyxicephalus adspersus
2000257111	MAAU	amphibian	Amphibia	Mantella	aurantiaca	NA	MALAGASY GOLDEN	MANTELLA	LIV	100	NO	700	MG	MG	T	W	C	C	2000-05-29	2000	2000-05-29	2000	I	MI	GLOBAL TROPICAL REPTILES	LA FERME EXOTIQUE	NA	Mantella aurantiaca	Mantella aurantiaca
2000257111	MANB	amphibian	Amphibia	Mantella	betsileo	NA	BETSILEO GOLDEN	MANTELLA	LIV	200	NO	800	MG	MG	T	W	C	C	2000-05-29	2000	2000-05-29	2000	I	MI	GLOBAL TROPICAL REPTILES	LA FERME EXOTIQUE	NA	Mantella betsileo	Mantella betsileo
2000257111	MCRO	amphibian	Amphibia	Mantella	crocea	NA	EASTERN GOLDEN	MANTELLA	LIV	100	NO	800	MG	MG	T	W	C	C	2000-05-29	2000	2000-05-29	2000	I	MI	GLOBAL TROPICAL REPTILES	LA FERME EXOTIQUE	NA	Mantella crocea	Mantella crocea
2000257111	MMAD	amphibian	Amphibia	Mantella	madagascariensis	NA	MADAGASCAR GOLDEN	MANTELLA	LIV	200	NO	800	MG	MG	T	W	C	C	2000-05-29	2000	2000-05-29	2000	I	MI	GLOBAL TROPICAL REPTILES	LA FERME EXOTIQUE	NA	Mantella madagascariensis	Mantella madagascariensis
2000257111	MNLA	amphibian	Amphibia	Mantella	laevigata	NA	FOLOHY GOLDEN	MANTELLA	LIV	100	NO	700	MG	MG	T	W	C	C	2000-05-29	2000	2000-05-29	2000	I	MI	GLOBAL TROPICAL REPTILES	LA FERME EXOTIQUE	NA	Mantella laevigata	Mantella laevigata
2000257111	MPLC	amphibian	Amphibia	Mantella	pulchra	NA	PARKER'S GOLDEN	MANTELLA	LIV	200	NO	800	MG	MG	T	W	C	C	2000-05-29	2000	2000-05-29	2000	I	MI	GLOBAL TROPICAL REPTILES	LA FERME EXOTIQUE	NA	Mantella pulchra	Mantella pulchra
2000770320	PBIF	amphibian	Amphibia	Phrynomantis	bifasciatus	NA	S AFR SNAKE-NECK	FROG	LIV	22	NO	11	TZ	TZ	T	W	C	C	2000-05-08	2000	2000-05-29	2000	I	LA	L. A. REPTILE	KISASE INVESTMENT	NA	Phrynomantis bifasciatus	Phrynomantis bifasciatus
2000794628	RABE	amphibian	Amphibia	Rana	berlandieri	NA	RIO GRANDE	FROG	LIV	300	KG	1937	MX	MX	T	W	C	C	2000-05-30	2000	2000-05-30	2000	I	BV	RANA LABORATORIES	MONTALVO ALVARO GARZA	NA	Rana berlandieri	Rana berlandieri
2000794628	RAPI	amphibian	Amphibia	Rana	pipiens	NA	NORTHERN LEOPARD	FROG	LIV	350	KG	2260	MX	MX	T	W	C	C	2000-05-30	2000	2000-05-30	2000	I	BV	RANA LABORATORIES	MONTALVO ALVARO GARZA	NA	Rana pipiens	Rana pipiens
2000761478	RACA	amphibian	Amphibia	Rana	catesbeiana	NA	NA	BULLFROG	LIV	654	KG	580	DO	DO	T	C	C	C	2000-06-09	2000	2000-05-31	2000	I	NW	TIN TIN FISH TRADING INC.	LIVE FROGS	Original value in 'species' column: catesbeinana	Rana catesbeiana	Rana catesbeiana
2000769683	PHPE	amphibian	Amphibia	Philautus	petersi	NA	PETERS BUBBLE-NEST	FROG	SPE	1	NO	0	MY	MY	S	W	C	C	2000-06-20	2000	2000-05-31	2000	I	CH	DIVISION OF AMPHIBIANS AND REPTILES FIELD MUSEUM	SABAH PARKS MUSEUM OF ZOO RESEARCH & EDUC	NA	Philautus petersi	Philautus petersi
2000769687	PHPE	amphibian	Amphibia	Philautus	petersi	NA	PETERS BUBBLE-NEST	FROG	SPE	1	NO	0	MY	MY	S	W	C	C	2000-06-20	2000	2000-05-31	2000	I	CH	DIVISION OF AMPHIBIANS AND REPTILES FIELD MUSEUM	SABAH PARKS MUSEUM OF ZOO RESEARCH & EDUC	NA	Philautus petersi	Philautus petersi
2000772595	ANCT	amphibian	Amphibia	NA	NA	NA	NON-CITES	AMPHIBIANS	LIV	82	NO	12	PY	PY	T	W	C	C	2000-05-31	2000	2000-05-31	2000	I	LA	IZI INTERNATIONAL ZOOLOGICAL IMPORTS	EXOTIC AQUAIRUM	NA	Na na	NA
2000772595	PHRV	amphibian	Amphibia	Phrynohyas	venulosa	NA	VEINED TREE	FROG	LIV	9	NO	1	PY	PY	T	W	C	C	2000-05-31	2000	2000-05-31	2000	I	LA	IZI INTERNATIONAL ZOOLOGICAL IMPORTS	EXOTIC AQUAIRUM	NA	Phrynohyas venulosa	NA
2000772595	PHSA	amphibian	Amphibia	Phyllomedusa	sauvagii	NA	PAINT-BELLY MONKEY	FROG	LIV	7	NO	2	PY	PY	T	W	C	C	2000-05-31	2000	2000-05-31	2000	I	LA	IZI INTERNATIONAL ZOOLOGICAL IMPORTS	EXOTIC AQUAIRUM	NA	Phyllomedusa sauvagii	Phyllomedusa sauvagii
2000803933	XELA	amphibian	Amphibia	Xenopus	laevis	NA	AFRICAN CLAWED	TOAD	LIV	1200	NO	100	NG	NG	T	U	C	C	2000-05-31	2000	2000-05-31	2000	I	MI	GOLDFISH & KOI USA, INC.	FOL & P VENTURES	NA	Xenopus laevis	Xenopus laevis
2000804555	AGCL	amphibian	Amphibia	Agalychnis	callidryas	NA	RED-EYED TREE	FROG	LIV	200	NO	600	NI	NI	T	C	C	C	2000-05-31	2000	2000-05-31	2000	I	MI	BURGUNDY REPTILE TRADERS	NATURALEZA ANIMAL EXPORT, S.A.	NA	Agalychnis callidryas	Agalychnis callidryas
2000965193	RNIG	amphibian	Amphibia	Rhacophorus	nigropalmatus	NA	ABAH RIVER FLYING	FROG	LIV	300	NO	150	VN	VN	T	U	C	C	2000-06-01	2000	2000-05-31	2000	I	MI	MIAMI REPTILE	V.C.S. CORP.	NA	Rhacophorus nigropalmatus	Rhacophorus nigropalmatus
2000769991	RMAC	amphibian	Amphibia	Rana	macrodon	NA	NA	BULLFROG	MEA	18506	KG	74191	VN	VN	T	C	C	C	2000-06-02	2000	2000-06-01	2000	I	LA	BEAVER STREET FISHERIES, INC.	CANTHO AGRICULTURAL AND ANIMAL PRODUCTS	NA	Rana macrodon	NA
2000770800	RACA	amphibian	Amphibia	Rana	catesbeiana	NA	NA	BULLFROG	MEA	9525	KG	53609	TW	TW	T	C	C	C	2000-06-02	2000	2000-06-01	2000	I	LA	PACIFIC AMERICAN FISH CO., INC.	FOREVER FROZEN SEAFOODS, INC	Original value in 'species' column: catesbeinana	Rana catesbeiana	Rana catesbeiana
2000773140	BOOR	amphibian	Amphibia	Bombina	orientalis	NA	ORIENTAL FIREBELLY	TOAD	LIV	6000	NO	720	CN	CN	T	W	C	C	2000-06-01	2000	2000-06-01	2000	I	LA	R. H. PET INCORPORATED	SAB FUQI IMPORT & EXPORT CO LTD	NA	Bombina orientalis	Bombina orientalis
2000788978	RACA	amphibian	Amphibia	Rana	catesbeiana	NA	NA	BULLFROG	LIV	1200	NO	343	DO	DO	T	C	C	C	2000-08-29	2000	2000-06-01	2000	I	NW	NORTH SEA TRADING CORPORATION	HECTOR ANT. TORO	Original value in 'species' column: catesbeinana	Rana catesbeiana	Rana catesbeiana
2000789856	RMAC	amphibian	Amphibia	Rana	macrodon	NA	NA	BULLFROG	LEG	19731	KG	107136	ID	BE	T	W	C	C	2000-05-31	2000	2000-06-01	2000	I	BO	INTEROCEAN INC.	EUROTRACO AMERIKALEI	NA	Rana macrodon	NA
2000818958	RACA	amphibian	Amphibia	Rana	catesbeiana	NA	NA	BULLFROG	LIV	1000	KG	1000	BR	BR	T	W	C	C	2000-06-20	2000	2000-06-01	2000	I	NY	KIN YICK TRADING CORPORATION	RANAJA IMPORT & EXPORT	Original value in 'species' column: catesbeinana	Rana catesbeiana	Rana catesbeiana
2000821079	HYMC	amphibian	Amphibia	Hymenochirus	curtipes	NA	W. DWARF CLAWED	FROG	LIV	1000	NO	110	HK	HK	T	U	C	C	2000-06-01	2000	2000-06-01	2000	I	TP	5-D TROPICAL, INC.	WUN FAT AQUARIUM	NA	Hymenochirus curtipes	Hymenochirus curtipes
2000761490	RACA	amphibian	Amphibia	Rana	catesbeiana	NA	NA	BULLFROG	LIV	726	KG	600	DO	DO	T	C	C	C	2000-06-09	2000	2000-06-02	2000	I	NW	TIN TIN FISH TRADING INC.	LIVE FROGS	Original value in 'species' column: catesbeinana	Rana catesbeiana	Rana catesbeiana
2000778938	RACA	amphibian	Amphibia	Rana	catesbeiana	NA	NA	BULLFROG	LIV	359	NO	400	MX	MX	T	W	C	C	2000-06-21	2000	2000-06-02	2000	I	MP	BIO CORPORATION	NA	Original value in 'species' column: catesbeinana	Rana catesbeiana	Rana catesbeiana
2000778938	RAPI	amphibian	Amphibia	Rana	pipiens	NA	NORTHERN LEOPARD	FROG	LIV	4343	NO	2475	MX	MX	T	W	C	C	2000-06-21	2000	2000-06-02	2000	I	MP	BIO CORPORATION	NA	NA	Rana pipiens	Rana pipiens
2000758343	CYPY	amphibian	Amphibia	Cynops	pyrrhogaster	NA	JAPANESE FIREBELLY	NEWT	LIV	885	NO	132	HK	HK	T	W	C	C	2000-06-03	2000	2000-06-03	2000	I	NY	TRANSSHIP DISCOUNTS LTD.	UNION TROPICAL FISH FARM	NA	Cynops pyrrhogaster	Cynops pyrrhogaster
2000758343	XELA	amphibian	Amphibia	Xenopus	laevis	NA	AFRICAN CLAWED	TOAD	LIV	1625	NO	244	HK	HK	T	W	C	C	2000-06-03	2000	2000-06-03	2000	I	NY	TRANSSHIP DISCOUNTS LTD.	UNION TROPICAL FISH FARM	NA	Xenopus laevis	Xenopus laevis
2000761114	RACA	amphibian	Amphibia	Rana	catesbeiana	NA	NA	BULLFROG	LIV	1164	KG	1100	EC	EC	T	C	C	C	2000-06-05	2000	2000-06-03	2000	I	NW	HOY LUNG COMPANY	JUAN PABLO VILLACRES	Original value in 'species' column: catesbeinana	Rana catesbeiana	Rana catesbeiana
2000771601	CEGU	amphibian	Amphibia	Ceratobatrachus	guentheri	NA	GUNTHER'S TRIANGLE	FROG	LIV	116	NO	240	SB	SB	T	W	C	C	2000-06-03	2000	2000-06-03	2000	I	LA	L. A. REPTILE	JINNEY ROBERT ETE	NA	Ceratobatrachus guentheri	NA
2000773605	AMBT	amphibian	Amphibia	Ambystoma	tigrinum	NA	TIGER	SALAMANDER	LIV	100	NO	111	VS	JP	T	W	C	C	2000-06-03	2000	2000-06-03	2000	I	LA	DOLPHIN INTERNATIONAL	KAMIHATA FISH IND. LTD.	NA	Ambystoma tigrinum	Ambystoma tigrinum
2000760410	XELA	amphibian	Amphibia	Xenopus	laevis	NA	AFRICAN CLAWED	TOAD	LIV	70	NO	4	SG	SG	T	W	C	C	2000-06-07	2000	2000-06-04	2000	I	NY	TRANSSHIP DISCOUNTS LTD.	AQUAWORLD TROPICAL FISH	NA	Xenopus laevis	Xenopus laevis
2000761482	RACA	amphibian	Amphibia	Rana	catesbeiana	NA	NA	BULLFROG	LIV	726	KG	600	DO	DO	T	C	C	C	2000-06-09	2000	2000-06-04	2000	I	NW	TIN TIN FISH TRADING INC.	LIVE FROGS	Original value in 'species' column: catesbeinana	Rana catesbeiana	Rana catesbeiana
2000769330	HYMC	amphibian	Amphibia	Hymenochirus	curtipes	NA	W. DWARF CLAWED	FROG	LIV	5100	NO	600	SG	SG	T	R	C	C	2000-06-04	2000	2000-06-04	2000	I	LA	AQUA-NAUTIC SPECIALIST	AQUANAUTICS SPECIALIST PTE LIMITED	NA	Hymenochirus curtipes	Hymenochirus curtipes
2000771546	HYMB	amphibian	Amphibia	Hymenochirus	boettgeri	NA	ZAIRE DWARF CLAWED	FROG	LIV	325	NO	39	HK	HK	T	R	C	C	2000-06-04	2000	2000-06-04	2000	I	LA	TROPICAL ENTERPRISES	CEYLON AQUARIUM	NA	Hymenochirus boettgeri	Hymenochirus boettgeri
2000773196	HYMB	amphibian	Amphibia	Hymenochirus	boettgeri	NA	ZAIRE DWARF CLAWED	FROG	LIV	600	NO	66	HK	HK	T	C	C	C	2000-06-04	2000	2000-06-04	2000	I	LA	GLOBAL AQUATIC CONSULTING	BOKO EXPRESS COMPANY	NA	Hymenochirus boettgeri	Hymenochirus boettgeri
2000773544	BUME	amphibian	Amphibia	Bufo	melanostictus	NA	BLACK-SPINED	TOAD	LIV	60	NO	24	VN	VN	T	W	C	C	2000-06-04	2000	2000-06-04	2000	I	LA	UNIVERSAL AQUATIC	CORIMEX	NA	Bufo melanostictus	Duttaphrynus melanostictus
2000773544	KALO	amphibian	Amphibia	Kaloula	pulchra	NA	ASIATIC PAINTED	FROG	LIV	230	NO	92	VN	VN	T	W	C	C	2000-06-04	2000	2000-06-04	2000	I	LA	UNIVERSAL AQUATIC	CORIMEX	NA	Kaloula pulchra	Kaloula pulchra
2000773544	OOLI	amphibian	Amphibia	Occidozyga	lima	NA	PADDY	FROG	LIV	70	NO	14	VN	VN	T	W	C	C	2000-06-04	2000	2000-06-04	2000	I	LA	UNIVERSAL AQUATIC	CORIMEX	Original value in 'genus' column: ooedozyga	Occidozyga lima	Occidozyga lima
2000773544	RLEU	amphibian	Amphibia	Rhacophorus	leucomystax	NA	FLYING	FROG	LIV	200	NO	80	VN	VN	T	W	C	C	2000-06-04	2000	2000-06-04	2000	I	LA	UNIVERSAL AQUATIC	CORIMEX	NA	Rhacophorus leucomystax	NA
2000773651	HYMC	amphibian	Amphibia	Hymenochirus	curtipes	NA	W. DWARF CLAWED	FROG	LIV	900	NO	60	ID	ID	T	W	C	C	2000-06-04	2000	2000-06-04	2000	I	LA	DOLPHIN INTERNATIONAL	P.T. VIVARIA INDONESIA	NA	Hymenochirus curtipes	Hymenochirus curtipes
2000773651	LICA	amphibian	Amphibia	Litoria	caerulea	NA	WHITE'S TREE	FROG	LIV	290	NO	447	ID	ID	T	W	C	C	2000-06-04	2000	2000-06-04	2000	I	LA	DOLPHIN INTERNATIONAL	P.T. VIVARIA INDONESIA	NA	Litoria caerulea	Litoria caerulea
2000773651	OOLI	amphibian	Amphibia	Occidozyga	lima	NA	PADDY	FROG	LIV	300	NO	15	ID	ID	T	W	C	C	2000-06-04	2000	2000-06-04	2000	I	LA	DOLPHIN INTERNATIONAL	P.T. VIVARIA INDONESIA	Original value in 'genus' column: ooedozyga	Occidozyga lima	Occidozyga lima
2000773655	OOLI	amphibian	Amphibia	Occidozyga	lima	NA	PADDY	FROG	LIV	1050	NO	42	ID	ID	T	W	C	C	2000-06-04	2000	2000-06-04	2000	I	LA	DOLPHIN INTERNATIONAL	VIVAJAYA INTERNATIONAL	Original value in 'genus' column: ooedozyga	Occidozyga lima	Occidozyga lima
2000773676	CYOR	amphibian	Amphibia	Cynops	orientalis	NA	CHINESE DWARF	NEWT	LIV	1400	NO	112	HK	HK	T	C	C	C	2000-06-04	2000	2000-06-04	2000	I	XX	DOLPHIN INTERNATIONAL	SANWOO FISHERIES	NA	Cynops orientalis	Cynops orientalis
2000773676	HYMC	amphibian	Amphibia	Hymenochirus	curtipes	NA	W. DWARF CLAWED	FROG	LIV	3920	NO	470	HK	HK	T	C	C	C	2000-06-04	2000	2000-06-04	2000	I	XX	DOLPHIN INTERNATIONAL	SANWOO FISHERIES	NA	Hymenochirus curtipes	Hymenochirus curtipes
2000774143	HYMC	amphibian	Amphibia	Hymenochirus	curtipes	NA	W. DWARF CLAWED	FROG	LIV	1600	NO	368	HK	HK	T	R	C	C	2000-06-04	2000	2000-06-04	2000	I	LA	AQUACO, INC.	DRAGON FISHERIES	NA	Hymenochirus curtipes	Hymenochirus curtipes
2000775470	BOOR	amphibian	Amphibia	Bombina	orientalis	NA	ORIENTAL FIREBELLY	TOAD	LIV	1400	NO	493	CN	CN	T	C	C	C	2000-06-04	2000	2000-06-04	2000	I	LA	DOLPHIN INTERNATIONAL	SHANGHAI GOLDEN FIELD GARDENING CO LIMITED	NA	Bombina orientalis	Bombina orientalis
2000775470	CYOR	amphibian	Amphibia	Cynops	orientalis	NA	CHINESE DWARF	NEWT	LIV	4800	NO	451	CN	CN	T	C	C	C	2000-06-04	2000	2000-06-04	2000	I	LA	DOLPHIN INTERNATIONAL	SHANGHAI GOLDEN FIELD GARDENING CO LIMITED	NA	Cynops orientalis	Cynops orientalis
2000775470	PACB	amphibian	Amphibia	Pachytriton	brevipes	NA	TSITOU	NEWT	LIV	100	NO	41	CN	CN	T	C	C	C	2000-06-04	2000	2000-06-04	2000	I	LA	DOLPHIN INTERNATIONAL	SHANGHAI GOLDEN FIELD GARDENING CO LIMITED	NA	Pachytriton brevipes	Pachytriton brevipes
2000763321	RACA	amphibian	Amphibia	Rana	catesbeiana	NA	NA	BULLFROG	LIV	10000	KG	34564	TW	TW	T	W	C	C	2000-06-05	2000	2000-06-05	2000	I	SF	NOR-CAL SEAFOOD INC.	PENSETO SEAFOOD CO LTD	Original value in 'species' column: catesbeinana	Rana catesbeiana	Rana catesbeiana
2000794505	RACA	amphibian	Amphibia	Rana	catesbeiana	NA	NA	BULLFROG	SPE	300	NO	165	MX	MX	T	W	C	C	2000-06-06	2000	2000-06-05	2000	I	NG	RANACO CORPORATION	P.A.M.E.E.S.A.	Original value in 'species' column: catesbeinana	Rana catesbeiana	Rana catesbeiana
2000794505	RAFO	amphibian	Amphibia	Rana	forreri	NA	FORRER'S GRASS	FROG	SPE	8940	NO	3510	MX	MX	T	W	C	C	2000-06-06	2000	2000-06-05	2000	I	NG	RANACO CORPORATION	P.A.M.E.E.S.A.	NA	Rana forreri	Rana forreri
2000767152	RACA	amphibian	Amphibia	Rana	catesbeiana	NA	NA	BULLFROG	LIV	1200	NO	350	DO	DO	T	C	C	C	2000-06-09	2000	2000-06-06	2000	I	NW	NORTH SEA TRADING CORPORATION	HECTOR ANT. TORO	Original value in 'species' column: catesbeinana	Rana catesbeiana	Rana catesbeiana
2000768307	RACA	amphibian	Amphibia	Rana	catesbeiana	NA	NA	BULLFROG	LIV	176	NO	225	MX	MX	T	W	C	C	2000-06-06	2000	2000-06-06	2000	I	MP	BIO CORPORATION	COMPRA VENTA DE RANA VIVA	Original value in 'species' column: catesbeinana	Rana catesbeiana	Rana catesbeiana
2000768307	RAPI	amphibian	Amphibia	Rana	pipiens	NA	NORTHERN LEOPARD	FROG	LIV	4724	NO	2325	MX	MX	T	W	C	C	2000-06-06	2000	2000-06-06	2000	I	MP	BIO CORPORATION	COMPRA VENTA DE RANA VIVA	NA	Rana pipiens	Rana pipiens
2000789109	DEAU	amphibian	Amphibia	Dendrobates	auratus	NA	GREEN	POISON-ARROW FROG	LIV	6	NO	75	NL	NL	T	C	C	C	2000-06-06	2000	2000-06-06	2000	I	DU	GAGLIARDO, RONALD W.	NA	NA	Dendrobates auratus	Dendrobates auratus
2000789109	DEGA	amphibian	Amphibia	Dendrobates	galactonotus	NA	SPLASH-BACKED	POISON-ARROW FROG	LIV	30	NO	600	NL	NL	T	C	C	C	2000-06-06	2000	2000-06-06	2000	I	DU	GAGLIARDO, RONALD W.	NA	NA	Dendrobates galactonotus	Adelphobates galactonotus
2000789109	DEIM	amphibian	Amphibia	Dendrobates	imitator	NA	MIMIC	POISON-ARROW FROG	LIV	15	NO	200	NL	NL	T	C	C	C	2000-06-06	2000	2000-06-06	2000	I	DU	GAGLIARDO, RONALD W.	NA	NA	Dendrobates imitator	Ranitomeya imitator
2000789109	DLAM	amphibian	Amphibia	Dendrobates	lamasi	NA	PASCO	POISON-ARROW FROG	LIV	20	NO	160	NL	NL	T	C	C	C	2000-06-06	2000	2000-06-06	2000	I	DU	GAGLIARDO, RONALD W.	NA	NA	Dendrobates lamasi	NA
2000789109	PHTE	amphibian	Amphibia	Phyllobates	terribilis	NA	GOLDEN	POISON-DART FROG	LIV	8	NO	225	NL	NL	T	C	C	C	2000-06-06	2000	2000-06-06	2000	I	DU	GAGLIARDO, RONALD W.	NA	NA	Phyllobates terribilis	Phyllobates terribilis
2000791902	RACA	amphibian	Amphibia	Rana	catesbeiana	NA	NA	BULLFROG	LIV	1000	KG	1000	BR	BR	T	W	C	C	2000-06-06	2000	2000-06-06	2000	I	NY	KIN YICK TRADING CORPORATION	RANAJAX IMPORT & EXPORT	Original value in 'species' column: catesbeinana	Rana catesbeiana	Rana catesbeiana
2000792738	BRMO	amphibian	Amphibia	Breviceps	mossambiscus	NA	MZ SHORT-HEADED	FROG	LIV	50	NO	38	TZ	TZ	T	W	C	C	2000-06-06	2000	2000-06-06	2000	I	SE	OLIVIER ALLEN MOI COMPANY	GRECHANT LIMITED	NA	Breviceps mossambiscus	NA
2000792738	LARG	amphibian	Amphibia	Leptopelis	argenteus	NA	BAGAM. FOREST TREE	FROG	LIV	25	NO	25	TZ	TZ	T	W	C	C	2000-06-06	2000	2000-06-06	2000	I	SE	OLIVIER ALLEN MOI COMPANY	GRECHANT LIMITED	NA	Leptopelis argenteus	Leptopelis argenteus
2000760549	XELA	amphibian	Amphibia	Xenopus	laevis	NA	AFRICAN CLAWED	TOAD	LIV	1050	NO	105	NG	NG	T	W	C	C	2000-06-07	2000	2000-06-07	2000	I	NY	OKUOLU INTERNATIONAL USA INC.	OKUOLO INTERNATIONAL NIGERIA	NA	Xenopus laevis	Xenopus laevis
2000764637	SASA	amphibian	Amphibia	Salamandra	salamandra	NA	EUROPEAN FIRE	SALAMANDER	LIV	100	NO	800	RU	RU	T	W	C	C	2000-06-07	2000	2000-06-07	2000	I	NY	REPTILE MASTERS	ZOOLEX	NA	Salamandra salamandra	Salamandra salamandra
2000771584	SASA	amphibian	Amphibia	Salamandra	salamandra	NA	EUROPEAN FIRE	SALAMANDER	LIV	400	NO	2800	RU	RU	T	W	C	C	2000-06-07	2000	2000-06-07	2000	I	LA	L. A. REPTILE	ZOOLEX CO	NA	Salamandra salamandra	Salamandra salamandra
2000775303	AGCL	amphibian	Amphibia	Agalychnis	callidryas	NA	RED-EYED TREE	FROG	LIV	50	NO	375	MX	MX	T	W	C	C	2000-06-08	2000	2000-06-07	2000	I	LA	SANDFIRE DRAGON RANCH	BIOMAT DEL CARIEE S.A	NA	Agalychnis callidryas	Agalychnis callidryas
2000775303	SMBA	amphibian	Amphibia	Smilisca	baudinii	NA	COMMON MEX. TREE	FROG	LIV	1290	NO	2580	MX	MX	T	W	C	C	2000-06-08	2000	2000-06-07	2000	I	LA	SANDFIRE DRAGON RANCH	BIOMAT DEL CARIEE S.A	NA	Smilisca baudinii	Smilisca baudinii
2000775303	TRPT	amphibian	Amphibia	Triprion	petasatus	NA	YUC SHOV-HEAD TREE	FROG	LIV	100	NO	350	MX	MX	T	W	C	C	2000-06-08	2000	2000-06-07	2000	I	LA	SANDFIRE DRAGON RANCH	BIOMAT DEL CARIEE S.A	NA	Triprion petasatus	Triprion petasatus
2000775714	MENA	amphibian	Amphibia	Megophrys	nasuta	NA	SPADEFOOT	TOAD	LIV	94	NO	705	MY	MY	T	W	C	C	2000-06-07	2000	2000-06-07	2000	I	LA	L. A. REPTILE	CBS WILDLIFE	NA	Megophrys nasuta	Pelobatrachus nasuta
2000775714	PEHO	amphibian	Amphibia	Pedostibes	hosii	NA	BOULEN. ASIAN TREE	TOAD	LIV	1	NO	40	MY	MY	T	W	C	C	2000-06-07	2000	2000-06-07	2000	I	LA	L. A. REPTILE	CBS WILDLIFE	NA	Pedostibes hosii	Rentapia hosii
2000775714	RHRE	amphibian	Amphibia	Rhacophorus	reinwardtii	NA	REINWARDT'S FLYING	FROG	LIV	2	NO	13	MY	MY	T	W	C	C	2000-06-07	2000	2000-06-07	2000	I	LA	L. A. REPTILE	CBS WILDLIFE	NA	Rhacophorus reinwardtii	Rhacophorus reinwardtii
2000778748	XELA	amphibian	Amphibia	Xenopus	laevis	NA	AFRICAN CLAWED	TOAD	LIV	1300	NO	4420	CL	CL	T	C	C	C	2000-06-07	2000	2000-06-07	2000	I	CH	XENOPUS I, INC.	NA	NA	Xenopus laevis	Xenopus laevis
2000794558	RAPI	amphibian	Amphibia	Rana	pipiens	NA	NORTHERN LEOPARD	FROG	LIV	497	KG	3744	MX	MX	T	W	C	C	2000-06-07	2000	2000-06-07	2000	I	BV	AQUA FOODS INTERNATIONAL, INC.	ZOOLOGICA PARA INVESTIGACI	NA	Rana pipiens	Rana pipiens
2000803296	RACA	amphibian	Amphibia	Rana	catesbeiana	NA	NA	BULLFROG	LIV	3000	NO	987	TW	TW	T	W	C	C	2000-06-07	2000	2000-06-07	2000	I	NY	KIN YICK TRADING CORPORATION	ESTATE GALLEN INTERNATIONAL TRADE	Original value in 'species' column: catesbeinana	Rana catesbeiana	Rana catesbeiana
2000761799	RACA	amphibian	Amphibia	Rana	catesbeiana	NA	NA	BULLFROG	LIV	927	KG	927	EC	EC	T	W	C	C	2000-06-23	2000	2000-06-08	2000	I	NW	KIN YICK TRADING CORPORATION	ASO DE PRODUCTORES DE RANAS	Original value in 'species' column: catesbeinana	Rana catesbeiana	Rana catesbeiana
2000761857	RACA	amphibian	Amphibia	Rana	catesbeiana	NA	NA	BULLFROG	LIV	5000	NO	273	DO	DO	T	C	C	C	2000-06-23	2000	2000-06-08	2000	I	NW	NORTH SEA TRADING CORPORATION	NA	Original value in 'species' column: catesbeinana	Rana catesbeiana	Rana catesbeiana
2000762118	RACA	amphibian	Amphibia	Rana	catesbeiana	NA	NA	BULLFROG	LIV	1250	NO	357	DO	DO	T	C	C	C	2000-06-19	2000	2000-06-08	2000	I	NW	NORTH SEA TRADING CORPORATION	HECTOR ANT TORO	Original value in 'species' column: catesbeinana	Rana catesbeiana	Rana catesbeiana
2000765474	RACA	amphibian	Amphibia	Rana	catesbeiana	NA	NA	BULLFROG	MEA	8162	KG	47279	TW	TW	T	W	C	C	2000-06-07	2000	2000-06-08	2000	I	LA	SEA PORT PRODUCTS CORP.	MARNEX COMPANY	Original value in 'species' column: catesbeinana	Rana catesbeiana	Rana catesbeiana
2000765481	RACA	amphibian	Amphibia	Rana	catesbeiana	NA	NA	BULLFROG	MEA	8206	KG	46352	TW	TW	T	W	C	C	2000-06-07	2000	2000-06-08	2000	I	LA	SEA PORT PRODUCTS CORP.	TSAI FA FROZEN FOODS FACTORY CO LIMITED	Original value in 'species' column: catesbeinana	Rana catesbeiana	Rana catesbeiana
2000767027	RACA	amphibian	Amphibia	Rana	catesbeiana	NA	NA	BULLFROG	LIV	703	KG	414	DO	DO	T	C	C	C	2000-06-08	2000	2000-06-08	2000	I	NW	TIN TIN FISH TRADING INC.	LIVE FROGSS DONING ANA	Original value in 'species' column: catesbeinana	Rana catesbeiana	Rana catesbeiana
2000769829	MENA	amphibian	Amphibia	Megophrys	nasuta	NA	SPADEFOOT	TOAD	LIV	16	NO	80	ID	ID	T	W	C	C	2000-06-09	2000	2000-06-08	2000	I	LA	R. H. PET INCORPORATED	FIRMA HASCO	NA	Megophrys nasuta	Pelobatrachus nasuta
2000771718	HYMC	amphibian	Amphibia	Hymenochirus	curtipes	NA	W. DWARF CLAWED	FROG	LIV	1000	NO	150	NG	NG	T	W	C	C	2000-06-08	2000	2000-06-08	2000	I	LA	AQUA-NAUTIC SPECIALIST	MCBOD AQUARIUM SUPPLY	NA	Hymenochirus curtipes	Hymenochirus curtipes
2000821092	HYMC	amphibian	Amphibia	Hymenochirus	curtipes	NA	W. DWARF CLAWED	FROG	LIV	2000	NO	220	HK	HK	T	U	C	C	2000-06-08	2000	2000-06-08	2000	I	TP	5-D TROPICAL, INC.	WUN FAT AQUARIUM	NA	Hymenochirus curtipes	Hymenochirus curtipes
2000829023	XELA	amphibian	Amphibia	Xenopus	laevis	NA	AFRICAN CLAWED	TOAD	LIV	600	NO	1680	CL	CL	T	U	C	C	2000-06-08	2000	2000-06-08	2000	I	MI	XENOPUS EXPRESS	NA	NA	Xenopus laevis	Xenopus laevis
2000760609	RACA	amphibian	Amphibia	Rana	catesbeiana	NA	NA	BULLFROG	LIV	1000	KG	1000	BR	BR	T	W	C	C	2000-06-13	2000	2000-06-09	2000	I	NY	KIN YICK TRADING CORPORATION	RANERJAX IMPORT AND EXPORT	Original value in 'species' column: catesbeinana	Rana catesbeiana	Rana catesbeiana
2000765543	BOOR	amphibian	Amphibia	Bombina	orientalis	NA	ORIENTAL FIREBELLY	TOAD	LIV	10000	NO	3500	KR	KR	T	W	C	C	2000-06-09	2000	2000-06-09	2000	I	LA	GEO INTERNATIONAL	INTERPET KOREA	NA	Bombina orientalis	Bombina orientalis
2000774651	BOOR	amphibian	Amphibia	Bombina	orientalis	NA	ORIENTAL FIREBELLY	TOAD	LIV	2000	NO	200	CN	LA	T	R	C	C	2000-06-09	2000	2000-06-09	2000	I	LA	GOLDEN POND	XIAOSHAN IMPORT EXPORT CORP	NA	Bombina orientalis	Bombina orientalis
2000775022	DEPI	amphibian	Amphibia	Epipedobates	pictus	NA	SPOT-LEGGED	POISON-ARROW FROG	LIV	102	NO	408	PE	PE	T	W	C	C	2000-06-09	2000	2000-06-09	2000	I	LA	L. A. REPTILE	REPTILE EXPORT	NA	Epipedobates pictus	Ameerega picta
2000775022	GMON	amphibian	Amphibia	Gastrotheca	monticola	NA	MOUNTAIN MARSUPIAL	FROG	LIV	125	NO	313	PE	PE	T	W	C	C	2000-06-09	2000	2000-06-09	2000	I	LA	L. A. REPTILE	REPTILE EXPORT	NA	Gastrotheca monticola	Gastrotheca monticola
2000790423	CYPY	amphibian	Amphibia	Cynops	pyrrhogaster	NA	JAPANESE FIREBELLY	NEWT	LIV	32	NO	0	JP	JP	non-standard value	C	C	C	2000-06-09	2000	2000-06-09	2000	I	DU	UNIVERSITY OF VA	NA	Original value in 'purpose' column: N	Cynops pyrrhogaster	Cynops pyrrhogaster
2000794534	RACA	amphibian	Amphibia	Rana	catesbeiana	NA	NA	BULLFROG	SPE	1310	NO	1650	MX	MX	T	W	C	C	2000-06-12	2000	2000-06-09	2000	I	NG	RANACO CORPORATION	P.A.M.E.E.S.A.	Original value in 'species' column: catesbeinana	Rana catesbeiana	Rana catesbeiana
2000794534	RAFO	amphibian	Amphibia	Rana	forreri	NA	FORRER'S GRASS	FROG	SPE	10755	NO	4050	MX	MX	T	W	C	C	2000-06-12	2000	2000-06-09	2000	I	NG	RANACO CORPORATION	P.A.M.E.E.S.A.	NA	Rana forreri	Rana forreri
2000794634	RAPI	amphibian	Amphibia	Rana	pipiens	NA	NORTHERN LEOPARD	FROG	LIV	800	KG	5166	MX	MX	T	W	C	C	2000-06-09	2000	2000-06-09	2000	I	BV	RANA LABORATORIES	MONTALVO ALVARO GARZA	NA	Rana pipiens	Rana pipiens
2000767015	RACA	amphibian	Amphibia	Rana	catesbeiana	NA	NA	BULLFROG	LIV	584	KG	595	DO	DO	T	C	C	C	2000-07-17	2000	2000-06-10	2000	I	NW	TIN TIN FISH TRADING INC.	LIVE FROGS DONING ANA	Original value in 'species' column: catesbeinana	Rana catesbeiana	Rana catesbeiana
2000772740	BOOR	amphibian	Amphibia	Bombina	orientalis	NA	ORIENTAL FIREBELLY	TOAD	LIV	1000	NO	150	CN	CN	T	W	C	C	2000-06-10	2000	2000-06-10	2000	I	LA	Z IMPORTS INC.	XIAOSHAN IMPORT & EXPORT CO	NA	Bombina orientalis	Bombina orientalis
2000772740	CYOR	amphibian	Amphibia	Cynops	orientalis	NA	CHINESE DWARF	NEWT	LIV	1000	NO	50	CN	CN	T	W	C	C	2000-06-10	2000	2000-06-10	2000	I	LA	Z IMPORTS INC.	XIAOSHAN IMPORT & EXPORT CO	NA	Cynops orientalis	Cynops orientalis
2000766125	HYMC	amphibian	Amphibia	Hymenochirus	curtipes	NA	W. DWARF CLAWED	FROG	LIV	2800	NO	642	HK	HK	T	W	C	C	2000-06-11	2000	2000-06-11	2000	I	LA	AQUACO, INC.	DRAGON FISHERIES	NA	Hymenochirus curtipes	Hymenochirus curtipes
2000768660	LICA	amphibian	Amphibia	Litoria	caerulea	NA	WHITE'S TREE	FROG	LIV	25	NO	20	ID	ID	T	R	C	C	2000-06-11	2000	2000-06-11	2000	I	LA	DOLPHIN INTERNATIONAL	VIVAJAYA INTERNATIONAL	NA	Litoria caerulea	Litoria caerulea
2000768660	OOLI	amphibian	Amphibia	Occidozyga	lima	NA	PADDY	FROG	LIV	1050	NO	42	ID	ID	T	R	C	C	2000-06-11	2000	2000-06-11	2000	I	LA	DOLPHIN INTERNATIONAL	VIVAJAYA INTERNATIONAL	Original value in 'genus' column: ooedozyga	Occidozyga lima	Occidozyga lima
2000769589	HYMC	amphibian	Amphibia	Hymenochirus	curtipes	NA	W. DWARF CLAWED	FROG	LIV	3300	NO	204	ID	ID	T	R	C	C	2000-06-11	2000	2000-06-11	2000	I	LA	DOLPHIN INTERNATIONAL	P.T. VIVARIA INDONESIA	NA	Hymenochirus curtipes	Hymenochirus curtipes
2000769589	LICA	amphibian	Amphibia	Litoria	caerulea	NA	WHITE'S TREE	FROG	LIV	170	NO	290	ID	ID	T	R	C	C	2000-06-11	2000	2000-06-11	2000	I	LA	DOLPHIN INTERNATIONAL	P.T. VIVARIA INDONESIA	NA	Litoria caerulea	Litoria caerulea
2000769589	OOLI	amphibian	Amphibia	Occidozyga	lima	NA	PADDY	FROG	LIV	150	NO	8	ID	ID	T	R	C	C	2000-06-11	2000	2000-06-11	2000	I	LA	DOLPHIN INTERNATIONAL	P.T. VIVARIA INDONESIA	Original value in 'genus' column: ooedozyga	Occidozyga lima	Occidozyga lima
2000769597	CYOR	amphibian	Amphibia	Cynops	orientalis	NA	CHINESE DWARF	NEWT	LIV	3500	NO	245	HK	HK	T	R	C	C	2000-06-11	2000	2000-06-11	2000	I	LA	DOLPHIN INTERNATIONAL	SANWOO FISHERIES	NA	Cynops orientalis	Cynops orientalis
2000769597	HYMC	amphibian	Amphibia	Hymenochirus	curtipes	NA	W. DWARF CLAWED	FROG	LIV	2520	NO	302	HK	HK	T	R	C	C	2000-06-11	2000	2000-06-11	2000	I	LA	DOLPHIN INTERNATIONAL	SANWOO FISHERIES	NA	Hymenochirus curtipes	Hymenochirus curtipes
2000769597	TYVE	amphibian	Amphibia	Tylototriton	verrucosus	NA	CROCODILE	NEWT	LIV	500	NO	675	HK	HK	T	R	C	C	2000-06-11	2000	2000-06-11	2000	I	LA	DOLPHIN INTERNATIONAL	SANWOO FISHERIES	NA	Tylototriton verrucosus	Tylototriton verrucosus
2000769601	BOOR	amphibian	Amphibia	Bombina	orientalis	NA	ORIENTAL FIREBELLY	TOAD	LIV	1700	NO	617	CN	CN	T	R	C	C	2000-06-11	2000	2000-06-11	2000	I	LA	DOLPHIN INTERNATIONAL	SHANGHAI GOLDEN FIELD GARDENING COMPANY, LTD	NA	Bombina orientalis	Bombina orientalis
2000769601	CYOR	amphibian	Amphibia	Cynops	orientalis	NA	CHINESE DWARF	NEWT	LIV	3300	NO	322	CN	CN	T	R	C	C	2000-06-11	2000	2000-06-11	2000	I	LA	DOLPHIN INTERNATIONAL	SHANGHAI GOLDEN FIELD GARDENING COMPANY, LTD	NA	Cynops orientalis	Cynops orientalis
2000771973	HYMC	amphibian	Amphibia	Hymenochirus	curtipes	NA	W. DWARF CLAWED	FROG	LIV	1600	NO	640	SG	SG	T	W	C	C	2000-06-11	2000	2000-06-11	2000	I	LA	AQUA-NAUTIC SPECIALIST	AQUANAUTICS SPECIALIST PTE LTD	NA	Hymenochirus curtipes	Hymenochirus curtipes
2000791201	OOLI	amphibian	Amphibia	Occidozyga	lima	NA	PADDY	FROG	LIV	150	NO	14	ID	ID	T	W	C	C	2000-06-14	2000	2000-06-11	2000	I	NY	TRANSSHIP DISCOUNTS LTD.	VIVAJAYA INTERNATIONAL	Original value in 'genus' column: ooedozyga	Occidozyga lima	Occidozyga lima
2000802427	HYMC	amphibian	Amphibia	Hymenochirus	curtipes	NA	W. DWARF CLAWED	FROG	LIV	800	NO	96	CN	CN	T	W	C	C	2000-06-19	2000	2000-06-11	2000	I	NY	TRI-COUNTY TROPICALS, INC.	CORNWALL AQUATICS	NA	Hymenochirus curtipes	Hymenochirus curtipes
2000168529	AGCL	amphibian	Amphibia	Agalychnis	callidryas	NA	RED-EYED TREE	FROG	LIV	300	NO	1400	NI	NI	T	W	C	C	2000-06-29	2000	2000-06-12	2000	I	MI	EMERALD CORAL & REPTILE	ZOONICA S.A.	NA	Agalychnis callidryas	Agalychnis callidryas
2000765656	AGCL	amphibian	Amphibia	Agalychnis	callidryas	NA	RED-EYED TREE	FROG	LIV	100	NO	300	NI	NI	T	W	C	C	2000-06-12	2000	2000-06-12	2000	I	LA	R. H. PET INCORPORATED	FAUMARNICA AND CIA LTDA	NA	Agalychnis callidryas	Agalychnis callidryas
2000774301	PBIF	amphibian	Amphibia	Phrynomantis	bifasciatus	NA	S AFR SNAKE-NECK	FROG	LIV	217	NO	325	GH	GH	T	W	C	C	2000-06-12	2000	2000-06-12	2000	I	LA	CALIFORNIA ZOOLOGICAL SUPPLY	ALLO EXPORTS	NA	Phrynomantis bifasciatus	Phrynomantis bifasciatus
2000781635	AGCL	amphibian	Amphibia	Agalychnis	callidryas	NA	RED-EYED TREE	FROG	LIV	554	NO	3961	GT	GT	T	U	C	C	2000-06-12	2000	2000-06-12	2000	I	MI	EMERALD CORAL & REPTILE	PROYECTOS AGRICOLAS S.A.	NA	Agalychnis callidryas	Agalychnis callidryas
2000788793	RACA	amphibian	Amphibia	Rana	catesbeiana	NA	NA	BULLFROG	LIV	67	KG	400	DO	DO	T	C	C	C	2000-07-31	2000	2000-06-12	2000	I	NW	TIN TIN FISH TRADING INC.	LIVE FROGSS	Original value in 'species' column: catesbeinana	Rana catesbeiana	Rana catesbeiana
2000789678	PBIF	amphibian	Amphibia	Phrynomantis	bifasciatus	NA	S AFR SNAKE-NECK	FROG	LIV	90	NO	162	TZ	TZ	T	C	C	C	2000-06-12	2000	2000-06-12	2000	I	DN	TEPEDELEN, KAMURAN	A.F. SUPPLIES AND SERVICES	NA	Phrynomantis bifasciatus	Phrynomantis bifasciatus
2000772854	RMAC	amphibian	Amphibia	Rana	macrodon	NA	NA	BULLFROG	LEG	18370	KG	87070	ID	ID	T	W	C	C	2000-06-14	2000	2000-06-13	2000	I	LA	BEAVER STREET FISHERIES, INC.	PT. SUMBER PANGAN NUSANTARA	NA	Rana macrodon	NA
2000806490	KALO	amphibian	Amphibia	Kaloula	pulchra	NA	ASIATIC PAINTED	FROG	LIV	3	NO	6	ID	ID	T	W	C	C	2000-06-13	2000	2000-06-13	2000	I	LA	INTERNATIONAL DRAGON BREEDERS INC	FIRMA HASCO	NA	Kaloula pulchra	Kaloula pulchra
2000768256	RACA	amphibian	Amphibia	Rana	catesbeiana	NA	NA	BULLFROG	LIV	352	NO	187	MX	MX	T	W	C	C	2000-06-14	2000	2000-06-14	2000	I	MP	BIO CORPORATION	ARTURO BELTAN COL.	Original value in 'species' column: catesbeinana	Rana catesbeiana	Rana catesbeiana
2000768256	RAPI	amphibian	Amphibia	Rana	pipiens	NA	NORTHERN LEOPARD	FROG	LIV	6972	NO	3695	MX	MX	T	W	C	C	2000-06-14	2000	2000-06-14	2000	I	MP	BIO CORPORATION	ARTURO BELTAN COL.	NA	Rana pipiens	Rana pipiens
2000769026	BUME	amphibian	Amphibia	Bufo	melanostictus	NA	BLACK-SPINED	TOAD	LIV	60	NO	27	TH	TH	T	W	C	C	2000-06-14	2000	2000-06-14	2000	I	LA	PETS INTERNATIONAL	ASIA WORLD WIDE IMPORT & EXPORT	NA	Bufo melanostictus	Duttaphrynus melanostictus
2000769026	KALO	amphibian	Amphibia	Kaloula	pulchra	NA	ASIATIC PAINTED	FROG	LIV	1120	NO	609	TH	TH	T	W	C	C	2000-06-14	2000	2000-06-14	2000	I	LA	PETS INTERNATIONAL	ASIA WORLD WIDE IMPORT & EXPORT	NA	Kaloula pulchra	Kaloula pulchra
2000769026	RLEU	amphibian	Amphibia	Rhacophorus	leucomystax	NA	FLYING	FROG	LIV	75	NO	68	TH	TH	T	W	C	C	2000-06-14	2000	2000-06-14	2000	I	LA	PETS INTERNATIONAL	ASIA WORLD WIDE IMPORT & EXPORT	NA	Rhacophorus leucomystax	NA
2000769385	KALO	amphibian	Amphibia	Kaloula	pulchra	NA	ASIATIC PAINTED	FROG	LIV	70	NO	21	VN	VN	T	W	C	C	2000-06-14	2000	2000-06-14	2000	I	LA	LA GNATURE	CONFICO LIMITED	NA	Kaloula pulchra	Kaloula pulchra
2000769676	AGCL	amphibian	Amphibia	Agalychnis	callidryas	NA	RED-EYED TREE	FROG	LIV	150	NO	900	NI	NI	T	W	C	C	2000-06-15	2000	2000-06-14	2000	I	LA	L. A. REPTILE	EXPASA S.A.	NA	Agalychnis callidryas	Agalychnis callidryas
2000769676	DEAU	amphibian	Amphibia	Dendrobates	auratus	NA	GREEN	POISON-ARROW FROG	LIV	200	NO	1600	NI	NI	T	W	C	C	2000-06-15	2000	2000-06-14	2000	I	LA	L. A. REPTILE	EXPASA S.A.	NA	Dendrobates auratus	Dendrobates auratus
2000769676	DPUM	amphibian	Amphibia	Dendrobates	pumilio	NA	STRAWBERRY	POISON-ARROW FROG	LIV	100	NO	240	NI	NI	T	W	C	C	2000-06-15	2000	2000-06-14	2000	I	LA	L. A. REPTILE	EXPASA S.A.	NA	Dendrobates pumilio	Oophaga pumilio
2000776747	CYOR	amphibian	Amphibia	Cynops	orientalis	NA	CHINESE DWARF	NEWT	LIV	400	NO	20	CN	CN	T	W	C	C	2000-06-16	2000	2000-06-14	2000	I	NY	MIN HUA ENTERPRISE, INC.	SHANGHAI ESWELL ENTERPRISES	NA	Cynops orientalis	Cynops orientalis
2000819671	RACA	amphibian	Amphibia	Rana	catesbeiana	NA	NA	BULLFROG	LIV	3000	NO	1100	TW	TW	T	W	C	C	2000-06-19	2000	2000-06-14	2000	I	NY	HOY LUNG SEAFOOD CORPORATION	HORREI FISHERY CO	Original value in 'species' column: catesbeinana	Rana catesbeiana	Rana catesbeiana
2000830710	HEMM	amphibian	Amphibia	Hemisus	marmoratus	NA	MARBLED SHOVELNOSE	FROG	LIV	50	NO	100	TZ	TZ	T	W	C	C	2000-06-14	2000	2000-06-14	2000	I	LA	INTERNATIONAL DRAGON BREEDERS INC	KISASE INVESTMENT CO	NA	Hemisus marmoratus	Hemisus marmoratus
2000830710	PYAD	amphibian	Amphibia	Pyxicephalus	adspersus	NA	TSCHUDI'S AFRICAN	BULLFROG	LIV	20	NO	100	TZ	TZ	T	W	C	C	2000-06-14	2000	2000-06-14	2000	I	LA	INTERNATIONAL DRAGON BREEDERS INC	KISASE INVESTMENT CO	NA	Pyxicephalus adspersus	Pyxicephalus adspersus
2000965154	SASA	amphibian	Amphibia	Salamandra	salamandra	NA	EUROPEAN FIRE	SALAMANDER	LIV	73	NO	500	GB	GB	T	C	C	C	2000-06-23	2000	2000-06-14	2000	I	MI	GLADES HERP, INC.	THE LODGE	NA	Salamandra salamandra	Salamandra salamandra
2000761989	RACA	amphibian	Amphibia	Rana	catesbeiana	NA	NA	BULLFROG	LIV	249	KG	186	DO	DO	T	W	C	C	2000-06-21	2000	2000-06-15	2000	I	NW	TIN TIN FISH TRADING INC.	LIVE FROGS DONING ANA	Original value in 'species' column: catesbeinana	Rana catesbeiana	Rana catesbeiana
2000785459	DERE	amphibian	Amphibia	Dendrobates	reticulatus	NA	RETICULATED	POISON-ARROW FROG	LIV	111	NO	388	PE	PE	T	W	C	C	2000-06-16	2000	2000-06-15	2000	I	MI	GAMA SUPPLIERS, INC.	FAUNA EXPORT	NA	Dendrobates reticulatus	Ranitomeya reticulata
2000785459	GMAR	amphibian	Amphibia	Gastrotheca	marsupiata	NA	COMMON MARSUPIAL	FROG	LIV	317	NO	634	PE	PE	T	W	C	C	2000-06-16	2000	2000-06-15	2000	I	MI	GAMA SUPPLIERS, INC.	FAUNA EXPORT	NA	Gastrotheca marsupiata	Gastrotheca marsupiata
2000803975	PBIF	amphibian	Amphibia	Phrynomantis	bifasciatus	NA	S AFR SNAKE-NECK	FROG	LIV	16	NO	32	GH	GH	T	W	C	C	2000-06-15	2000	2000-06-15	2000	I	MI	NV PETS	PRINMASTER	NA	Phrynomantis bifasciatus	Phrynomantis bifasciatus
2000818207	RACA	amphibian	Amphibia	Rana	catesbeiana	NA	NA	BULLFROG	LIV	1000	KG	1000	BR	BR	T	W	C	C	2000-06-16	2000	2000-06-15	2000	I	NY	KIN YICK TRADING CORPORATION	RANAJAX IMPORT & EXPORT	Original value in 'species' column: catesbeinana	Rana catesbeiana	Rana catesbeiana
2000821104	HYMC	amphibian	Amphibia	Hymenochirus	curtipes	NA	W. DWARF CLAWED	FROG	LIV	1000	NO	110	HK	HK	T	U	C	C	2000-06-15	2000	2000-06-15	2000	I	TP	5-D TROPICAL, INC.	WUN FAT AQUARIUM	NA	Hymenochirus curtipes	Hymenochirus curtipes
2000837489	LICA	amphibian	Amphibia	Litoria	caerulea	NA	WHITE'S TREE	FROG	LIV	266	NO	399	ID	ID	T	W	C	C	2000-06-15	2000	2000-06-15	2000	I	MI	GAMA SUPPLIERS, INC.	P.T. MEGA CIRTINO	NA	Litoria caerulea	Litoria caerulea
2000837489	RMAC	amphibian	Amphibia	Rana	macrodon	NA	NA	BULLFROG	LIV	9	NO	27	ID	ID	T	W	C	C	2000-06-15	2000	2000-06-15	2000	I	MI	GAMA SUPPLIERS, INC.	P.T. MEGA CIRTINO	NA	Rana macrodon	NA
2000908553	BMAR	amphibian	Amphibia	Bufo	marinus	NA	NEOTROPICAL	TOAD	BOD	220	NO	220	NI	NI	T	W	C	C	2000-06-14	2000	2000-06-15	2000	I	MI	LOPEZ, LESLIE	NA	NA	Bufo marinus	NA
2000908553	BMAR	amphibian	Amphibia	Bufo	marinus	NA	NEOTROPICAL	TOAD	LPS	275	NO	275	NI	NI	T	W	C	C	2000-06-14	2000	2000-06-15	2000	I	MI	LOPEZ, LESLIE	NA	NA	Bufo marinus	NA
2000762018	RACA	amphibian	Amphibia	Rana	catesbeiana	NA	NA	BULLFROG	LIV	684	NO	200	DO	DO	T	C	C	C	2000-06-19	2000	2000-06-16	2000	I	NW	NORTH SEA TRADING CORPORATION	HECTOR ANT TORO	Original value in 'species' column: catesbeinana	Rana catesbeiana	Rana catesbeiana
2000761990	RACA	amphibian	Amphibia	Rana	catesbeiana	NA	NA	BULLFROG	LIV	306	KG	201	DO	DO	T	W	C	C	2000-06-21	2000	2000-06-17	2000	I	NW	TIN TIN FISH TRADING INC.	LIVE FROGSS DONING ANA	Original value in 'species' column: catesbeinana	Rana catesbeiana	Rana catesbeiana
2000764684	XELA	amphibian	Amphibia	Xenopus	laevis	NA	AFRICAN CLAWED	TOAD	LIV	4000	NO	600	HK	HK	T	W	C	C	2000-06-20	2000	2000-06-17	2000	I	NY	TRANSSHIP DISCOUNTS LTD.	UNION TROPICAL FISH FARM	NA	Xenopus laevis	Xenopus laevis
2000769532	RACA	amphibian	Amphibia	Rana	catesbeiana	NA	NA	BULLFROG	MEA	14197	KG	54060	ID	ID	T	C	C	C	2000-06-18	2000	2000-06-17	2000	I	LA	SETIADI NETWORK, INC	PT. HALIMAS MINA UTAMA	Original value in 'species' column: catesbeinana	Rana catesbeiana	Rana catesbeiana
2000774050	BOOR	amphibian	Amphibia	Bombina	orientalis	NA	ORIENTAL FIREBELLY	TOAD	LIV	5000	NO	1500	KR	KR	T	W	C	C	2000-06-17	2000	2000-06-17	2000	I	LA	PET-SIAM INTERNATIONAL	YICHO SANGSA	NA	Bombina orientalis	Bombina orientalis
2000781485	DTRI	amphibian	Amphibia	Epipedobates	tricolor	NA	PHANTASMAL	POISON-ARROW FROG	LIV	43	NO	2140	SR	SR	T	F	C	C	2000-06-17	2000	2000-06-17	2000	I	MI	L. A. REPTILE	TROPICAL BIRDS & REPTILES	NA	Epipedobates tricolor	Epipedobates tricolor
2000781485	PPIP	amphibian	Amphibia	Pipa	pipa	NA	SURINAM	TOAD	LIV	1	NO	70	SR	SR	T	W	C	C	2000-06-17	2000	2000-06-17	2000	I	MI	L. A. REPTILE	TROPICAL BIRDS & REPTILES	NA	Pipa pipa	Pipa pipa
2000762032	RACA	amphibian	Amphibia	Rana	catesbeiana	NA	NA	BULLFROG	LIV	0	NO	0	DO	DO	T	C	C	C	2000-06-19	2000	2000-06-18	2000	I	NW	NORTH SEA TRADING CORPORATION	HECTOR ANT TORO	Original value in 'species' column: catesbeinana	Rana catesbeiana	Rana catesbeiana
2000764783	BOOR	amphibian	Amphibia	Bombina	orientalis	NA	ORIENTAL FIREBELLY	TOAD	LIV	2300	NO	837	CN	CN	T	W	C	C	2000-06-18	2000	2000-06-18	2000	I	LA	DOLPHIN INTERNATIONAL	SHANGHAI GOLDEN FIELD GARDENING CO LIMITED	NA	Bombina orientalis	Bombina orientalis
2000764783	CYOR	amphibian	Amphibia	Cynops	orientalis	NA	CHINESE DWARF	NEWT	LIV	4200	NO	412	CN	CN	T	W	C	C	2000-06-18	2000	2000-06-18	2000	I	LA	DOLPHIN INTERNATIONAL	SHANGHAI GOLDEN FIELD GARDENING CO LIMITED	NA	Cynops orientalis	Cynops orientalis
2000764795	CYOR	amphibian	Amphibia	Cynops	orientalis	NA	CHINESE DWARF	NEWT	LIV	1700	NO	196	HK	HK	T	W	C	C	2000-06-18	2000	2000-06-18	2000	I	LA	DOLPHIN INTERNATIONAL	SANWOO FISHERIES	NA	Cynops orientalis	Cynops orientalis
2000764795	HYMC	amphibian	Amphibia	Hymenochirus	curtipes	NA	W. DWARF CLAWED	FROG	LIV	2520	NO	302	HK	HK	T	W	C	C	2000-06-18	2000	2000-06-18	2000	I	LA	DOLPHIN INTERNATIONAL	SANWOO FISHERIES	NA	Hymenochirus curtipes	Hymenochirus curtipes
2000764795	TYVE	amphibian	Amphibia	Tylototriton	verrucosus	NA	CROCODILE	NEWT	LIV	100	NO	135	HK	HK	T	W	C	C	2000-06-18	2000	2000-06-18	2000	I	LA	DOLPHIN INTERNATIONAL	SANWOO FISHERIES	NA	Tylototriton verrucosus	Tylototriton verrucosus
2000764829	HYMC	amphibian	Amphibia	Hymenochirus	curtipes	NA	W. DWARF CLAWED	FROG	LIV	900	NO	74	ID	ID	T	C	C	C	2000-06-18	2000	2000-06-18	2000	I	LA	DOLPHIN INTERNATIONAL	VIVARIA INDONESIA P.T.	NA	Hymenochirus curtipes	Hymenochirus curtipes
2000764829	LICA	amphibian	Amphibia	Litoria	caerulea	NA	WHITE'S TREE	FROG	LIV	210	NO	370	ID	ID	T	W	C	C	2000-06-18	2000	2000-06-18	2000	I	LA	DOLPHIN INTERNATIONAL	VIVARIA INDONESIA P.T.	NA	Litoria caerulea	Litoria caerulea
2000764829	OOLI	amphibian	Amphibia	Occidozyga	lima	NA	PADDY	FROG	LIV	825	NO	43	ID	ID	T	W	C	C	2000-06-18	2000	2000-06-18	2000	I	LA	DOLPHIN INTERNATIONAL	VIVARIA INDONESIA P.T.	Original value in 'genus' column: ooedozyga	Occidozyga lima	Occidozyga lima
2000769826	HYMC	amphibian	Amphibia	Hymenochirus	curtipes	NA	W. DWARF CLAWED	FROG	LIV	1600	NO	640	SG	SG	T	C	C	C	2000-06-18	2000	2000-06-18	2000	I	LA	AQUA-NAUTIC SPECIALIST	AQUANAUTICS SPECIALIST PTE LTD	NA	Hymenochirus curtipes	Hymenochirus curtipes
2000774084	HYMC	amphibian	Amphibia	Hymenochirus	curtipes	NA	W. DWARF CLAWED	FROG	LIV	1600	NO	369	HK	HK	T	C	C	C	2000-06-18	2000	2000-06-18	2000	I	LA	AQUACO, INC.	DRAGON FISHERIES	NA	Hymenochirus curtipes	Hymenochirus curtipes
2000761994	RACA	amphibian	Amphibia	Rana	catesbeiana	NA	NA	BULLFROG	LIV	408	KG	275	DO	DO	T	W	C	C	2000-06-21	2000	2000-06-19	2000	I	NW	TIN TIN FISH TRADING INC.	LIVE FROGSS DONING ANA	Original value in 'species' column: catesbeinana	Rana catesbeiana	Rana catesbeiana
2000763754	RACA	amphibian	Amphibia	Rana	catesbeiana	NA	NA	BULLFROG	LIV	10000	KG	47259	TW	TW	T	W	C	C	2000-06-19	2000	2000-06-19	2000	I	SF	NOR-CAL SEAFOOD INC.	PENSETO SEAFOODS CO LTD	Original value in 'species' column: catesbeinana	Rana catesbeiana	Rana catesbeiana
2000770628	HEMM	amphibian	Amphibia	Hemisus	marmoratus	NA	MARBLED SHOVELNOSE	FROG	LIV	200	NO	100	TZ	TZ	T	W	C	C	2000-06-19	2000	2000-06-19	2000	I	LA	L. A. REPTILE	KISASE INVESTMENTS	NA	Hemisus marmoratus	Hemisus marmoratus
2000794495	RACA	amphibian	Amphibia	Rana	catesbeiana	NA	NA	BULLFROG	SPE	320	NO	457	MX	MX	T	W	C	C	2000-06-19	2000	2000-06-19	2000	I	NG	RANACO CORPORATION	P.A.M.E.E.S.A.	Original value in 'species' column: catesbeinana	Rana catesbeiana	Rana catesbeiana
2000794495	RAFO	amphibian	Amphibia	Rana	forreri	NA	FORRER'S GRASS	FROG	SPE	6720	NO	2880	MX	MX	T	W	C	C	2000-06-19	2000	2000-06-19	2000	I	NG	RANACO CORPORATION	P.A.M.E.E.S.A.	NA	Rana forreri	Rana forreri
2000819122	RACA	amphibian	Amphibia	Rana	catesbeiana	NA	NA	BULLFROG	LIV	1000	NO	1000	BR	BR	T	W	C	C	2000-06-20	2000	2000-06-19	2000	I	NY	KIN YICK TRADING CORPORATION	RANAJAX IMPORT & EXPORT	Original value in 'species' column: catesbeinana	Rana catesbeiana	Rana catesbeiana
2000257024	KALO	amphibian	Amphibia	Kaloula	pulchra	NA	ASIATIC PAINTED	FROG	LIV	262	NO	79	VN	VN	T	W	C	C	2000-06-21	2000	2000-06-21	2000	I	MI	GAMA SUPPLIERS, INC.	NA	NA	Kaloula pulchra	Kaloula pulchra
2000761782	RACA	amphibian	Amphibia	Rana	catesbeiana	NA	NA	BULLFROG	LIV	5000	NO	275	DO	DO	T	C	C	C	2000-06-26	2000	2000-06-21	2000	I	NW	TIN TIN FISH TRADING INC.	LIVE FROGS	Original value in 'species' column: catesbeinana	Rana catesbeiana	Rana catesbeiana
2000767311	ANDA	amphibian	Amphibia	Andrias	davidianus	NA	CHINESE GIANT	SALAMANDER	LIV	1	NO	100000	XX	NL	Z	U	C	C	2000-06-21	2000	2000-06-21	2000	I	AT	CINCINNATI ZOO & BOTANICAL GARDEN	ROTERDAM ZOO	NA	Andrias davidianus	Andrias davidianus
2000769956	BOOR	amphibian	Amphibia	Bombina	orientalis	NA	ORIENTAL FIREBELLY	TOAD	LIV	3500	NO	350	CN	CN	T	W	C	C	2000-06-21	2000	2000-06-21	2000	I	LA	GOLDEN POND	XIAOSHAN IMP.	NA	Bombina orientalis	Bombina orientalis
2000818270	BOOR	amphibian	Amphibia	Bombina	orientalis	NA	ORIENTAL FIREBELLY	TOAD	LIV	200	NO	10	CN	CN	T	W	C	C	2000-06-28	2000	2000-06-21	2000	I	NY	MIN HUA ENTERPRISE, INC.	SHANGHAI ESWELL ENTERPRISE COMPANY LTD	NA	Bombina orientalis	Bombina orientalis
2000818270	CYOR	amphibian	Amphibia	Cynops	orientalis	NA	CHINESE DWARF	NEWT	LIV	100	NO	5	CN	CN	T	W	C	C	2000-06-28	2000	2000-06-21	2000	I	NY	MIN HUA ENTERPRISE, INC.	SHANGHAI ESWELL ENTERPRISE COMPANY LTD	NA	Cynops orientalis	Cynops orientalis
2000824743	RAPI	amphibian	Amphibia	Rana	pipiens	NA	NORTHERN LEOPARD	FROG	LIV	700	KG	4521	MX	MX	T	W	C	C	2000-06-21	2000	2000-06-21	2000	I	BV	RANA LABORATORIES	ALVARO GARZA MONTALVO	NA	Rana pipiens	Rana pipiens
2000965072	AGCL	amphibian	Amphibia	Agalychnis	callidryas	NA	RED-EYED TREE	FROG	LIV	500	NO	1000	GT	GT	T	U	C	C	2000-06-21	2000	2000-06-21	2000	I	MI	AUDETTE, DAVID WARREN	AGROPRODUCTOS CARDONA S.A.	NA	Agalychnis callidryas	Agalychnis callidryas
2000762270	RACA	amphibian	Amphibia	Rana	catesbeiana	NA	NA	BULLFROG	LIV	1236	NO	361	DO	DO	T	C	C	C	2000-06-22	2000	2000-06-22	2000	I	NW	NORTH SEA TRADING CORPORATION	HECTOR ANT TORO	Original value in 'species' column: catesbeinana	Rana catesbeiana	Rana catesbeiana
2000764045	RMAC	amphibian	Amphibia	Rana	macrodon	NA	NA	BULLFROG	LPS	2	NO	1397	SA	IT	T	W	C	C	2000-06-26	2000	2000-06-22	2000	I	NY	G.V. DISTRIBUTION LLC	DIVER SRL	NA	Rana macrodon	NA
2000764629	RACA	amphibian	Amphibia	Rana	catesbeiana	NA	NA	BULLFROG	LIV	1500	KG	1029	TW	TW	T	W	C	C	2000-07-03	2000	2000-06-22	2000	I	NY	KIN YICK TRADING CORPORATION	ESTATE GALLERY INTERNATIONAL TRADE	Original value in 'species' column: catesbeinana	Rana catesbeiana	Rana catesbeiana
2000788966	RACA	amphibian	Amphibia	Rana	catesbeiana	NA	NA	BULLFROG	LIV	963	KG	963	EC	EC	T	C	C	C	2000-06-30	2000	2000-06-22	2000	I	NW	KIN YICK TRADING CORPORATION	VIVACOCE Y CIA	Original value in 'species' column: catesbeinana	Rana catesbeiana	Rana catesbeiana
2000798482	RACA	amphibian	Amphibia	Rana	catesbeiana	NA	NA	BULLFROG	LIV	2500	NO	910	TW	TW	T	W	C	C	2000-06-30	2000	2000-06-22	2000	I	NY	INGLESIDE PLANTATION NURSERIES	HORREI FISHERY COMPANY	Original value in 'species' column: catesbeinana	Rana catesbeiana	Rana catesbeiana
2000821107	HYMC	amphibian	Amphibia	Hymenochirus	curtipes	NA	W. DWARF CLAWED	FROG	LIV	2000	NO	220	HK	HK	T	U	C	C	2000-06-22	2000	2000-06-22	2000	I	TP	5-D TROPICAL, INC.	WUN FAT AQUARIUM	NA	Hymenochirus curtipes	Hymenochirus curtipes
2000872349	LICA	amphibian	Amphibia	Litoria	caerulea	NA	WHITE'S TREE	FROG	LIV	1000	NO	3200	GB	GB	T	U	C	C	2000-09-23	2000	2000-06-22	2000	I	MI	GAMA SUPPLIERS, INC.	HEALY, KEVIN	NA	Litoria caerulea	Litoria caerulea
2000762326	RACA	amphibian	Amphibia	Rana	catesbeiana	NA	NA	BULLFROG	LIV	919	KG	563	DO	DO	T	C	C	C	2000-06-28	2000	2000-06-23	2000	I	NW	TIN TIN FISH TRADING INC.	LIVE FROGS	Original value in 'species' column: catesbeinana	Rana catesbeiana	Rana catesbeiana
2000765328	MAAU	amphibian	Amphibia	Mantella	aurantiaca	NA	MALAGASY GOLDEN	MANTELLA	LIV	100	NO	500	MG	MG	T	W	C	C	2000-06-23	2000	2000-06-23	2000	I	LA	INTERNATIONAL DRAGON BREEDERS INC	RABARISON, WILLIAM	NA	Mantella aurantiaca	Mantella aurantiaca
2000765328	MANV	amphibian	Amphibia	Mantella	viridis	NA	GREEN GOLDEN	MANTELLA	LIV	50	NO	250	MG	MG	T	W	C	C	2000-06-23	2000	2000-06-23	2000	I	LA	INTERNATIONAL DRAGON BREEDERS INC	RABARISON, WILLIAM	NA	Mantella viridis	Mantella viridis
2000766869	RACA	amphibian	Amphibia	Rana	catesbeiana	NA	NA	BULLFROG	LIV	5000	NO	540	DO	DO	T	C	C	C	2000-07-03	2000	2000-06-23	2000	I	NW	TIN TIN FISH TRADING INC.	LIVE FROGS	Original value in 'species' column: catesbeinana	Rana catesbeiana	Rana catesbeiana
2000904395	BOOA	amphibian	Amphibia	Boophis	albilabris	NA	WHT-LIP BRIGHT-EYE	FROG	LIV	30	NO	90	MG	MG	T	U	C	C	2000-06-23	2000	2000-06-23	2000	I	MI	NV PETS	NA	NA	Boophis albilabris	Boophis albilabris
2000904395	MAAU	amphibian	Amphibia	Mantella	aurantiaca	NA	MALAGASY GOLDEN	MANTELLA	LIV	30	NO	90	MG	MG	T	W	C	C	2000-06-23	2000	2000-06-23	2000	I	MI	NV PETS	NA	NA	Mantella aurantiaca	Mantella aurantiaca
2000904395	MANV	amphibian	Amphibia	Mantella	viridis	NA	GREEN GOLDEN	MANTELLA	LIV	30	NO	60	MG	MG	T	U	C	C	2000-06-23	2000	2000-06-23	2000	I	MI	NV PETS	NA	NA	Mantella viridis	Mantella viridis
2000904395	MNLA	amphibian	Amphibia	Mantella	laevigata	NA	FOLOHY GOLDEN	MANTELLA	LIV	30	NO	68	MG	MG	T	U	C	C	2000-06-23	2000	2000-06-23	2000	I	MI	NV PETS	NA	NA	Mantella laevigata	Mantella laevigata
2000904395	SCGO	amphibian	Amphibia	Scaphiophryne	gottlebei	NA	GOTTLEBE'S MICROHY	FROG	LIV	15	NO	60	MG	MG	T	U	C	C	2000-06-23	2000	2000-06-23	2000	I	MI	NV PETS	NA	NA	Scaphiophryne gottlebei	Scaphiophryne gottlebei
2000904395	SCMR	amphibian	Amphibia	Scaphiophryne	marmorata	NA	MARBLED RAIN	FROG	LIV	20	NO	90	MG	MG	T	U	C	C	2000-06-23	2000	2000-06-23	2000	I	MI	NV PETS	NA	NA	Scaphiophryne marmorata	Scaphiophryne marmorata
2000904395	SPUS	amphibian	Amphibia	Scaphiophryne	pustulosa	NA	GREEN RAIN	FROG	LIV	20	NO	60	MG	MG	T	U	C	C	2000-06-23	2000	2000-06-23	2000	I	MI	NV PETS	NA	NA	Scaphiophryne pustulosa	NA
2000762267	RACA	amphibian	Amphibia	Rana	catesbeiana	NA	NA	BULLFROG	LIV	5000	NO	319	DO	DO	T	C	C	C	2000-06-27	2000	2000-06-24	2000	I	NW	NORTH SEA TRADING CORPORATION	HECTOR ANT TORO	Original value in 'species' column: catesbeinana	Rana catesbeiana	Rana catesbeiana
2000762336	RACA	amphibian	Amphibia	Rana	catesbeiana	NA	NA	BULLFROG	LIV	908	KG	575	DO	DO	T	C	C	C	2000-06-28	2000	2000-06-24	2000	I	NW	TIN TIN FISH TRADING INC.	LIVE FROGS	Original value in 'species' column: catesbeinana	Rana catesbeiana	Rana catesbeiana
2000783814	PHBC	amphibian	Amphibia	Phyllomedusa	bicolor	NA	GIANT MONKEY	FROG	LIV	40	NO	600	SR	SR	T	W	C	C	2000-06-26	2000	2000-06-24	2000	I	MI	NA	HENZENS TROPICAL WILDLIFE	NA	Phyllomedusa bicolor	Phyllomedusa bicolor
2000783818	BMAR	amphibian	Amphibia	Bufo	marinus	NA	NEOTROPICAL	TOAD	LIV	17	NO	425	SR	SR	T	W	C	C	2000-06-26	2000	2000-06-24	2000	I	MI	NA	HENSEN'S TROPICAL	NA	Bufo marinus	NA
2000783818	PHBC	amphibian	Amphibia	Phyllomedusa	bicolor	NA	GIANT MONKEY	FROG	LIV	50	NO	375	SR	SR	T	W	C	C	2000-06-26	2000	2000-06-24	2000	I	MI	NA	HENSEN'S TROPICAL	NA	Phyllomedusa bicolor	Phyllomedusa bicolor
2000783824	PHBC	amphibian	Amphibia	Phyllomedusa	bicolor	NA	GIANT MONKEY	FROG	LIV	5	NO	125	SR	SR	T	W	C	C	2000-06-26	2000	2000-06-24	2000	I	MI	LA REPTILES INC	TROPICAL BIRDS AND REPTILES	NA	Phyllomedusa bicolor	Phyllomedusa bicolor
2000802411	CYPY	amphibian	Amphibia	Cynops	pyrrhogaster	NA	JAPANESE FIREBELLY	NEWT	LIV	450	NO	54	HK	HK	T	W	C	C	2000-06-29	2000	2000-06-24	2000	I	NY	TRANSSHIP DISCOUNTS LTD.	UNION TROPICAL FISH FARM	NA	Cynops pyrrhogaster	Cynops pyrrhogaster
2000802411	XELA	amphibian	Amphibia	Xenopus	laevis	NA	AFRICAN CLAWED	TOAD	LIV	2250	NO	338	HK	HK	T	W	C	C	2000-06-29	2000	2000-06-24	2000	I	NY	TRANSSHIP DISCOUNTS LTD.	UNION TROPICAL FISH FARM	NA	Xenopus laevis	Xenopus laevis
2000765091	HYMC	amphibian	Amphibia	Hymenochirus	curtipes	NA	W. DWARF CLAWED	FROG	LIV	50	NO	20	SG	SG	T	W	C	C	2000-06-25	2000	2000-06-25	2000	I	LA	AQUACO, INC.	SUNRISE AQUARIUM PTE LIMITED	NA	Hymenochirus curtipes	Hymenochirus curtipes
2000765093	HYMC	amphibian	Amphibia	Hymenochirus	curtipes	NA	W. DWARF CLAWED	FROG	LIV	2000	NO	458	HK	HK	T	W	C	C	2000-06-25	2000	2000-06-25	2000	I	LA	AQUACO, INC.	DRAGON FISHERIES	NA	Hymenochirus curtipes	Hymenochirus curtipes
2000769448	LICA	amphibian	Amphibia	Litoria	caerulea	NA	WHITE'S TREE	FROG	LIV	50	NO	40	ID	ID	T	W	C	C	2000-06-25	2000	2000-06-25	2000	I	LA	DOLPHIN INTERNATIONAL	VIVAJAYA INTERNATIONAL	NA	Litoria caerulea	Litoria caerulea
2000769448	OOLI	amphibian	Amphibia	Occidozyga	lima	NA	PADDY	FROG	LIV	1050	NO	42	ID	ID	T	W	C	C	2000-06-25	2000	2000-06-25	2000	I	LA	DOLPHIN INTERNATIONAL	VIVAJAYA INTERNATIONAL	Original value in 'genus' column: ooedozyga	Occidozyga lima	Occidozyga lima
2000769480	ANCT	amphibian	Amphibia	NA	NA	NA	NON-CITES	AMPHIBIANS	LIV	100	NO	43	CN	CN	T	W	C	C	2000-06-25	2000	2000-06-25	2000	I	LA	DOLPHIN INTERNATIONAL	SHANGHAI GOLDEN FIELD GARDENING CO LIMITED	NA	Na na	NA
2000769480	BOOR	amphibian	Amphibia	Bombina	orientalis	NA	ORIENTAL FIREBELLY	TOAD	LIV	1900	NO	707	CN	CN	T	W	C	C	2000-06-25	2000	2000-06-25	2000	I	LA	DOLPHIN INTERNATIONAL	SHANGHAI GOLDEN FIELD GARDENING CO LIMITED	NA	Bombina orientalis	Bombina orientalis
2000769480	CYOR	amphibian	Amphibia	Cynops	orientalis	NA	CHINESE DWARF	NEWT	LIV	10200	NO	1028	CN	CN	T	W	C	C	2000-06-25	2000	2000-06-25	2000	I	LA	DOLPHIN INTERNATIONAL	SHANGHAI GOLDEN FIELD GARDENING CO LIMITED	NA	Cynops orientalis	Cynops orientalis
2000769483	HYMC	amphibian	Amphibia	Hymenochirus	curtipes	NA	W. DWARF CLAWED	FROG	LIV	150	NO	12	ID	ID	T	W	C	C	2000-06-25	2000	2000-06-25	2000	I	LA	DOLPHIN INTERNATIONAL	VIVARIA INDONESIA P.T.	NA	Hymenochirus curtipes	Hymenochirus curtipes
2000769483	LICA	amphibian	Amphibia	Litoria	caerulea	NA	WHITE'S TREE	FROG	LIV	150	NO	150	ID	ID	T	W	C	C	2000-06-25	2000	2000-06-25	2000	I	LA	DOLPHIN INTERNATIONAL	VIVARIA INDONESIA P.T.	NA	Litoria caerulea	Litoria caerulea
2000769483	OOLI	amphibian	Amphibia	Occidozyga	lima	NA	PADDY	FROG	LIV	900	NO	45	ID	ID	T	W	C	C	2000-06-25	2000	2000-06-25	2000	I	LA	DOLPHIN INTERNATIONAL	VIVARIA INDONESIA P.T.	Original value in 'genus' column: ooedozyga	Occidozyga lima	Occidozyga lima
2000769506	CYOR	amphibian	Amphibia	Cynops	orientalis	NA	CHINESE DWARF	NEWT	LIV	1425	NO	182	HK	HK	T	W	C	C	2000-06-25	2000	2000-06-25	2000	I	LA	DOLPHIN INTERNATIONAL	SANWOO FISHERIES	NA	Cynops orientalis	Cynops orientalis
2000769506	HYMC	amphibian	Amphibia	Hymenochirus	curtipes	NA	W. DWARF CLAWED	FROG	LIV	3360	NO	403	HK	HK	T	W	C	C	2000-06-25	2000	2000-06-25	2000	I	LA	DOLPHIN INTERNATIONAL	SANWOO FISHERIES	NA	Hymenochirus curtipes	Hymenochirus curtipes
2000769506	TYVE	amphibian	Amphibia	Tylototriton	verrucosus	NA	CROCODILE	NEWT	LIV	100	NO	135	HK	HK	T	W	C	C	2000-06-25	2000	2000-06-25	2000	I	LA	DOLPHIN INTERNATIONAL	SANWOO FISHERIES	NA	Tylototriton verrucosus	Tylototriton verrucosus
2000769925	HYMC	amphibian	Amphibia	Hymenochirus	curtipes	NA	W. DWARF CLAWED	FROG	LIV	1400	NO	560	SG	SG	T	W	C	C	2000-06-25	2000	2000-06-25	2000	I	LA	AQUA-NAUTIC SPECIALIST	AQUANAUTICS SPECIALIST PTE LTD	NA	Hymenochirus curtipes	Hymenochirus curtipes
2000167502	AGCL	amphibian	Amphibia	Agalychnis	callidryas	NA	RED-EYED TREE	FROG	LIV	100	NO	700	NI	NI	T	C	C	C	2000-06-26	2000	2000-06-26	2000	I	MI	EMERALD CORAL & REPTILE	ZOONICA S.A.	NA	Agalychnis callidryas	Agalychnis callidryas
2000762290	RACA	amphibian	Amphibia	Rana	catesbeiana	NA	NA	BULLFROG	LIV	5000	NO	540	DO	DO	T	C	C	C	2000-06-29	2000	2000-06-26	2000	I	NW	TIN TIN FISH TRADING INC.	LIVE FROGS DOM SA	Original value in 'species' column: catesbeinana	Rana catesbeiana	Rana catesbeiana
2000802023	RACA	amphibian	Amphibia	Rana	catesbeiana	NA	NA	BULLFROG	LIV	1000	KG	1000	BR	BR	T	W	C	C	2000-06-28	2000	2000-06-26	2000	I	NY	KIN YICK TRADING CORPORATION	RAMAJAX IMPORT & EXPORT	Original value in 'species' column: catesbeinana	Rana catesbeiana	Rana catesbeiana
2000762271	RACA	amphibian	Amphibia	Rana	catesbeiana	NA	NA	BULLFROG	LIV	1300	NO	364	DO	DO	T	C	C	C	2000-06-27	2000	2000-06-27	2000	I	NW	NORTH SEA TRADING CORPORATION	HECTOR ANT TORO	Original value in 'species' column: catesbeinana	Rana catesbeiana	Rana catesbeiana
2000967510	AGCL	amphibian	Amphibia	Agalychnis	callidryas	NA	RED-EYED TREE	FROG	LIV	100	NO	175	NI	NI	T	W	C	C	2000-06-27	2000	2000-06-27	2000	I	MI	SALMERON, JOSE	EXPANSA	NA	Agalychnis callidryas	Agalychnis callidryas
2000967510	DEAU	amphibian	Amphibia	Dendrobates	auratus	NA	GREEN	POISON-ARROW FROG	LIV	175	NO	350	NI	NI	T	W	C	C	2000-06-27	2000	2000-06-27	2000	I	MI	SALMERON, JOSE	EXPANSA	NA	Dendrobates auratus	Dendrobates auratus
2000967510	DPUM	amphibian	Amphibia	Dendrobates	pumilio	NA	STRAWBERRY	POISON-ARROW FROG	LIV	300	NO	600	NI	NI	T	W	C	C	2000-06-27	2000	2000-06-27	2000	I	MI	SALMERON, JOSE	EXPANSA	NA	Dendrobates pumilio	Oophaga pumilio
2000763877	ANCT	amphibian	Amphibia	NA	NA	NA	NON-CITES	AMPHIBIANS	LIV	1200	NO	240	NE	NG	T	W	C	C	2000-06-28	2000	2000-06-28	2000	I	SF	AQUARIUM SEASONS (USA) INC.	QUALITY FISH UNLIMITED	NA	Na na	NA
2000767146	RACA	amphibian	Amphibia	Rana	catesbeiana	NA	NA	BULLFROG	LIV	5000	NO	517	DO	DO	T	C	C	C	2000-07-06	2000	2000-06-28	2000	I	NW	TIN TIN FISH TRADING INC.	LIVE FROGS DOMINICANA	Original value in 'species' column: catesbeinana	Rana catesbeiana	Rana catesbeiana
2000770107	RACA	amphibian	Amphibia	Rana	catesbeiana	NA	NA	BULLFROG	LEG	9525	NO	54680	TW	TW	T	W	C	C	2000-07-05	2000	2000-06-28	2000	I	LA	PACIFIC AMERICAN FISH CO., INC.	FOREVER FROZEN SEAFOODS, INC.	Original value in 'species' column: catesbeinana	Rana catesbeiana	Rana catesbeiana
2000770279	KASE	amphibian	Amphibia	Kassina	senegalensis	NA	SENEGAL RUNNING	FROG	LIV	500	NO	250	TZ	TZ	T	W	C	C	2000-06-28	2000	2000-06-28	2000	I	LA	CALIFORNIA ZOOLOGICAL SUPPLY	CANDIDA ENTERPRISES	NA	Kassina senegalensis	Kassina senegalensis
2000778941	RACA	amphibian	Amphibia	Rana	catesbeiana	NA	NA	BULLFROG	LIV	242	NO	360	MX	MX	T	W	C	C	2000-06-28	2000	2000-06-28	2000	I	MP	BIO CORPORATION	NA	Original value in 'species' column: catesbeinana	Rana catesbeiana	Rana catesbeiana
2000778941	RAPI	amphibian	Amphibia	Rana	pipiens	NA	NORTHERN LEOPARD	FROG	LIV	6485	NO	3240	MX	MX	T	W	C	C	2000-06-28	2000	2000-06-28	2000	I	MP	BIO CORPORATION	NA	NA	Rana pipiens	Rana pipiens
2000814105	BOOR	amphibian	Amphibia	Bombina	orientalis	NA	ORIENTAL FIREBELLY	TOAD	LIV	200	NO	10	CN	CN	T	W	C	C	2000-07-05	2000	2000-06-28	2000	I	NY	MIN HUA ENTERPRISE, INC.	SHANGHAI ESWELL ENTERPRISE COMPANY, LTD	NA	Bombina orientalis	Bombina orientalis
2000814105	CYOR	amphibian	Amphibia	Cynops	orientalis	NA	CHINESE DWARF	NEWT	LIV	100	NO	5	CN	CN	T	W	C	C	2000-07-05	2000	2000-06-28	2000	I	NY	MIN HUA ENTERPRISE, INC.	SHANGHAI ESWELL ENTERPRISE COMPANY, LTD	NA	Cynops orientalis	Cynops orientalis
2000765029	RACA	amphibian	Amphibia	Rana	catesbeiana	NA	NA	BULLFROG	MEA	8164	KG	47451	TW	TW	T	W	C	C	2000-06-27	2000	2000-06-29	2000	I	LA	SEA PORT PRODUCTS CORP.	MARNEX COMPANY	Original value in 'species' column: catesbeinana	Rana catesbeiana	Rana catesbeiana
2000766865	RACA	amphibian	Amphibia	Rana	catesbeiana	NA	NA	BULLFROG	LIV	1100	NO	294	DO	DO	T	C	C	C	2000-07-03	2000	2000-06-29	2000	I	NW	NORTH SEA TRADING CORPORATION	NA	Original value in 'species' column: catesbeinana	Rana catesbeiana	Rana catesbeiana
2000782611	CHIX	amphibian	Amphibia	Chiromantis	xerapelina	NA	AFRICAN GRAY TREE	FROG	LIV	20	NO	20	TZ	TZ	T	W	C	C	2000-06-29	2000	2000-06-29	2000	I	MI	NV PETS	MARINA TRADING CO	NA	Chiromantis xerapelina	NA
2000782611	KASE	amphibian	Amphibia	Kassina	senegalensis	NA	SENEGAL RUNNING	FROG	LIV	15	NO	15	TZ	TZ	T	W	C	C	2000-06-29	2000	2000-06-29	2000	I	MI	NV PETS	MARINA TRADING CO	NA	Kassina senegalensis	Kassina senegalensis
2000782611	PYAD	amphibian	Amphibia	Pyxicephalus	adspersus	NA	TSCHUDI'S AFRICAN	BULLFROG	LIV	20	NO	40	TZ	TZ	T	W	C	C	2000-06-29	2000	2000-06-29	2000	I	MI	NV PETS	MARINA TRADING CO	NA	Pyxicephalus adspersus	Pyxicephalus adspersus
2000790633	RACA	amphibian	Amphibia	Rana	catesbeiana	NA	NA	BULLFROG	LEG	19228	KG	109974	TW	TW	T	C	C	C	2000-06-27	2000	2000-06-29	2000	I	BO	INTEROCEAN INC.	TSAI FA FROZEN FOODS FACTORY CO LIMITED	Original value in 'species' column: catesbeinana	Rana catesbeiana	Rana catesbeiana
2000821075	HYMC	amphibian	Amphibia	Hymenochirus	curtipes	NA	W. DWARF CLAWED	FROG	LIV	1000	NO	110	HK	HK	T	U	C	C	2000-06-29	2000	2000-06-29	2000	I	TP	5-D TROPICAL, INC.	WUN FAT AQUARIUM	NA	Hymenochirus curtipes	Hymenochirus curtipes
2000767147	RACA	amphibian	Amphibia	Rana	catesbeiana	NA	NA	BULLFROG	LIV	5000	NO	510	DO	DO	T	C	C	C	2000-07-06	2000	2000-06-30	2000	I	NW	TIN TIN FISH TRADING INC.	LIVE FROGS DOMINICANA	Original value in 'species' column: catesbeinana	Rana catesbeiana	Rana catesbeiana
2000794542	RACA	amphibian	Amphibia	Rana	catesbeiana	NA	NA	BULLFROG	SPE	212	NO	457	MX	MX	T	W	C	C	2000-07-10	2000	2000-06-30	2000	I	NG	RANACO CORPORATION	P.A.M.E.E.S.A.	Original value in 'species' column: catesbeinana	Rana catesbeiana	Rana catesbeiana
2000794542	RAFO	amphibian	Amphibia	Rana	forreri	NA	FORRER'S GRASS	FROG	SPE	7840	NO	3240	MX	MX	T	W	C	C	2000-07-10	2000	2000-06-30	2000	I	NG	RANACO CORPORATION	P.A.M.E.E.S.A.	NA	Rana forreri	Rana forreri
2000802923	RACA	amphibian	Amphibia	Rana	catesbeiana	NA	NA	BULLFROG	LIV	1000	NO	525	TW	TW	T	W	C	C	2000-07-05	2000	2000-06-30	2000	I	NY	HOY LUNG SEAFOOD CORPORATION	HORREI FISHERY CO	Original value in 'species' column: catesbeinana	Rana catesbeiana	Rana catesbeiana
2000764486	XELA	amphibian	Amphibia	Xenopus	laevis	NA	AFRICAN CLAWED	TOAD	LIV	1920	NO	288	HK	HK	T	W	C	C	2000-07-03	2000	2000-07-01	2000	I	NY	TRANSSHIP DISCOUNTS LTD.	UNION TROPICAL FISH FARM	NA	Xenopus laevis	Xenopus laevis
2000766903	RACA	amphibian	Amphibia	Rana	catesbeiana	NA	NA	BULLFROG	LIV	1100	NO	294	DO	DO	T	C	C	C	2000-07-03	2000	2000-07-01	2000	I	NW	NORTH SEA TRADING CORPORATION	HECTOR ANT. TORO	Original value in 'species' column: catesbeinana	Rana catesbeiana	Rana catesbeiana
2000765769	KALO	amphibian	Amphibia	Kaloula	pulchra	NA	ASIATIC PAINTED	FROG	LIV	225	NO	90	VN	VN	T	W	C	C	2000-07-02	2000	2000-07-02	2000	I	LA	UNIVERSAL AQUATIC	CORIMEX	NA	Kaloula pulchra	Kaloula pulchra
2000765787	HYMB	amphibian	Amphibia	Hymenochirus	boettgeri	NA	ZAIRE DWARF CLAWED	FROG	LIV	300	NO	42	HK	HK	T	C	C	C	2000-07-02	2000	2000-07-02	2000	I	LA	MALLORY WESTERN & LEATHER	CEYLON AQUARIUM	NA	Hymenochirus boettgeri	Hymenochirus boettgeri
2000767145	RACA	amphibian	Amphibia	Rana	catesbeiana	NA	NA	BULLFROG	LIV	5000	NO	614	DO	DO	T	C	C	C	2000-07-06	2000	2000-07-02	2000	I	NW	TIN TIN FISH TRADING INC.	LIVE FROGS DOMINICANA	Original value in 'species' column: catesbeinana	Rana catesbeiana	Rana catesbeiana
2000769786	LICA	amphibian	Amphibia	Litoria	caerulea	NA	WHITE'S TREE	FROG	LIV	75	NO	60	ID	ID	T	C	C	C	2000-07-02	2000	2000-07-02	2000	I	LA	DOLPHIN INTERNATIONAL	VIVAJAYA INTERNATIONAL	NA	Litoria caerulea	Litoria caerulea
2000769786	OOLI	amphibian	Amphibia	Occidozyga	lima	NA	PADDY	FROG	LIV	450	NO	18	ID	ID	T	C	C	C	2000-07-02	2000	2000-07-02	2000	I	LA	DOLPHIN INTERNATIONAL	VIVAJAYA INTERNATIONAL	Original value in 'genus' column: ooedozyga	Occidozyga lima	Occidozyga lima
2000769870	CYOR	amphibian	Amphibia	Cynops	orientalis	NA	CHINESE DWARF	NEWT	LIV	700	NO	56	HK	HK	T	C	C	C	2000-07-02	2000	2000-07-02	2000	I	LA	DOLPHIN INTERNATIONAL	SANWOO FISHERIES	NA	Cynops orientalis	Cynops orientalis
2000769870	HYMC	amphibian	Amphibia	Hymenochirus	curtipes	NA	W. DWARF CLAWED	FROG	LIV	560	NO	67	HK	HK	T	C	C	C	2000-07-02	2000	2000-07-02	2000	I	LA	DOLPHIN INTERNATIONAL	SANWOO FISHERIES	NA	Hymenochirus curtipes	Hymenochirus curtipes
2000769870	TYVE	amphibian	Amphibia	Tylototriton	verrucosus	NA	CROCODILE	NEWT	LIV	86	NO	116	HK	HK	T	C	C	C	2000-07-02	2000	2000-07-02	2000	I	LA	DOLPHIN INTERNATIONAL	SANWOO FISHERIES	NA	Tylototriton verrucosus	Tylototriton verrucosus
2000769873	BOOR	amphibian	Amphibia	Bombina	orientalis	NA	ORIENTAL FIREBELLY	TOAD	LIV	1700	NO	611	CN	CN	T	C	C	C	2000-07-02	2000	2000-07-02	2000	I	LA	DOLPHIN INTERNATIONAL	SHANGHAI GOLDEN FIELD GARDENING CO LIMITED	NA	Bombina orientalis	Bombina orientalis
2000769873	CYOR	amphibian	Amphibia	Cynops	orientalis	NA	CHINESE DWARF	NEWT	LIV	4800	NO	464	CN	CN	T	C	C	C	2000-07-02	2000	2000-07-02	2000	I	LA	DOLPHIN INTERNATIONAL	SHANGHAI GOLDEN FIELD GARDENING CO LIMITED	NA	Cynops orientalis	Cynops orientalis
2000769873	PACB	amphibian	Amphibia	Pachytriton	brevipes	NA	TSITOU	NEWT	LIV	100	NO	42	CN	CN	T	C	C	C	2000-07-02	2000	2000-07-02	2000	I	LA	DOLPHIN INTERNATIONAL	SHANGHAI GOLDEN FIELD GARDENING CO LIMITED	NA	Pachytriton brevipes	Pachytriton brevipes
2000770046	HYMC	amphibian	Amphibia	Hymenochirus	curtipes	NA	W. DWARF CLAWED	FROG	LIV	1400	NO	560	SG	SG	T	C	C	C	2000-07-02	2000	2000-07-02	2000	I	LA	AQUA-NAUTIC SPECIALIST	AQUANAUTICS SPECIALIST PTE LIMITED	NA	Hymenochirus curtipes	Hymenochirus curtipes
2000775052	HYMB	amphibian	Amphibia	Hymenochirus	boettgeri	NA	ZAIRE DWARF CLAWED	FROG	LIV	600	NO	66	HK	HK	T	C	C	C	2000-07-02	2000	2000-07-02	2000	I	LA	GLOBAL AQUATIC CONSULTING	BOKO EXPRESS COMPANY	NA	Hymenochirus boettgeri	Hymenochirus boettgeri
2000806495	HYMC	amphibian	Amphibia	Hymenochirus	curtipes	NA	W. DWARF CLAWED	FROG	LIV	1600	NO	368	HK	HK	T	W	C	C	2000-07-02	2000	2000-07-02	2000	I	LA	AQUACO, INC.	DRAGON FISHERIES	NA	Hymenochirus curtipes	Hymenochirus curtipes
2000762539	RACA	amphibian	Amphibia	Rana	catesbeiana	NA	NA	BULLFROG	LIV	44000	NO	47610	TW	TW	T	W	C	C	2000-07-03	2000	2000-07-03	2000	I	SF	NOR-CAL SEAFOOD INC.	PENSETO SEAFOODS CO LTD	Original value in 'species' column: catesbeinana	Rana catesbeiana	Rana catesbeiana
2000765350	RACA	amphibian	Amphibia	Rana	catesbeiana	NA	NA	BULLFROG	LIV	1000	KG	1000	BR	BR	T	W	C	C	2000-07-07	2000	2000-07-03	2000	I	NY	KIN YICK TRADING CORPORATION	RANAJAX IMPORT & EXPORT	Original value in 'species' column: catesbeinana	Rana catesbeiana	Rana catesbeiana
2000765356	XELA	amphibian	Amphibia	Xenopus	laevis	NA	AFRICAN CLAWED	TOAD	LIV	1500	NO	150	NG	NG	T	W	C	C	2000-07-05	2000	2000-07-03	2000	I	NY	OKUOLU INTL	OKUOLU INTL	NA	Xenopus laevis	Xenopus laevis
2000778935	RAPI	amphibian	Amphibia	Rana	pipiens	NA	NORTHERN LEOPARD	FROG	LIV	5410	NO	3600	MX	MX	T	W	C	C	2000-07-03	2000	2000-07-03	2000	I	MP	BIO CORPORATION	NA	NA	Rana pipiens	Rana pipiens
2000824742	RAPI	amphibian	Amphibia	Rana	pipiens	NA	NORTHERN LEOPARD	FROG	LIV	1100	KG	6620	MX	MX	T	W	C	C	2000-07-03	2000	2000-07-03	2000	I	BV	RANA LABORATORIES	ALVARO GARZA MONTALVO	NA	Rana pipiens	Rana pipiens
2000767441	RACA	amphibian	Amphibia	Rana	catesbeiana	NA	NA	BULLFROG	LIV	5000	NO	1000	EC	EC	T	C	C	C	2000-07-13	2000	2000-07-04	2000	I	NW	HOY LUNG SEAFOOD CORPORATION	JUAN PABLO VILACRES	Original value in 'species' column: catesbeinana	Rana catesbeiana	Rana catesbeiana
2000774906	RACA	amphibian	Amphibia	Rana	catesbeiana	NA	NA	BULLFROG	MEA	4083	KG	23422	TW	TW	T	W	C	C	2000-07-11	2000	2000-07-04	2000	I	LA	H & N FISH CO.	FOREVER FROZEN FOODS, INC.	Original value in 'species' column: catesbeinana	Rana catesbeiana	Rana catesbeiana
2000869435	ANCT	amphibian	Amphibia	NA	NA	NA	NON-CITES	AMPHIBIANS	SPE	3	NO	0	XX	XX	S	W	C	C	2000-07-04	2000	2000-07-04	2000	I	DE	SHOSHANI, JEHESKEL	SHOSHANI, JEHESKEL	NA	Na na	NA
2000767030	RACA	amphibian	Amphibia	Rana	catesbeiana	NA	NA	BULLFROG	LIV	5000	NO	459	DO	DO	T	W	C	C	2000-07-17	2000	2000-07-05	2000	I	NW	TIN TIN FISH TRADING INC.	LIVE FROGS DOMINICANA	Original value in 'species' column: catesbeinana	Rana catesbeiana	Rana catesbeiana
2000767742	RACA	amphibian	Amphibia	Rana	catesbeiana	NA	NA	BULLFROG	LIV	1450	NO	413	DO	DO	T	C	C	C	2000-07-07	2000	2000-07-05	2000	I	NW	NORTH SEA TRADING CORPORATION	HECTOR ANT. TORO	Original value in 'species' column: catesbeinana	Rana catesbeiana	Rana catesbeiana
2000769886	KALO	amphibian	Amphibia	Kaloula	pulchra	NA	ASIATIC PAINTED	FROG	LIV	250	NO	75	VN	VN	T	W	C	C	2000-07-05	2000	2000-07-05	2000	I	LA	CALIFORNIA ZOOLOGICAL SUPPLY	CONFICO	NA	Kaloula pulchra	Kaloula pulchra
2000769933	KASE	amphibian	Amphibia	Kassina	senegalensis	NA	SENEGAL RUNNING	FROG	LIV	200	NO	300	TZ	TZ	T	W	C	C	2000-07-05	2000	2000-07-05	2000	I	LA	EXOTIC REPTILES JUNGLE	SWAN INVESTMENTS LIMITED	NA	Kassina senegalensis	Kassina senegalensis
2000788945	RACA	amphibian	Amphibia	Rana	catesbeiana	NA	NA	BULLFROG	LIV	843	KG	517	DO	DO	T	C	C	C	2000-07-31	2000	2000-07-05	2000	I	NW	TIN TIN FISH TRADING INC.	LIVE FROGS	Original value in 'species' column: catesbeinana	Rana catesbeiana	Rana catesbeiana
2000802439	CYPY	amphibian	Amphibia	Cynops	pyrrhogaster	NA	JAPANESE FIREBELLY	NEWT	LIV	660	NO	236	HK	HK	T	W	C	C	2000-07-17	2000	2000-07-05	2000	I	NY	ERDA INC.	BROTHER AQUARIUM	NA	Cynops pyrrhogaster	Cynops pyrrhogaster
2000802439	HYMC	amphibian	Amphibia	Hymenochirus	curtipes	NA	W. DWARF CLAWED	FROG	LIV	500	NO	100	HK	HK	T	W	C	C	2000-07-17	2000	2000-07-05	2000	I	NY	ERDA INC.	BROTHER AQUARIUM	NA	Hymenochirus curtipes	Hymenochirus curtipes
2000822020	BOOR	amphibian	Amphibia	Bombina	orientalis	NA	ORIENTAL FIREBELLY	TOAD	LIV	150	NO	15	CN	CN	T	W	C	C	2000-07-10	2000	2000-07-05	2000	I	NY	MIN HUA ENTERPRISE, INC.	SHANGHAI ESWELL ENTERPRISE CO LTD	NA	Bombina orientalis	Bombina orientalis
2000799840	AGCL	amphibian	Amphibia	Agalychnis	callidryas	NA	RED-EYED TREE	FROG	LIV	300	NO	2100	GT	GT	T	W	C	C	2000-07-06	2000	2000-07-06	2000	I	MI	GAMA SUPPLIERS, INC.	ACROPRODUCTOS CARDONA S.A	NA	Agalychnis callidryas	Agalychnis callidryas
2000821112	HYMC	amphibian	Amphibia	Hymenochirus	curtipes	NA	W. DWARF CLAWED	FROG	LIV	1000	NO	110	HK	HK	T	U	C	C	2000-07-05	2000	2000-07-06	2000	I	TP	5-D TROPICAL, INC.	WUN FAT AQUARIUM	NA	Hymenochirus curtipes	Hymenochirus curtipes
2000850625	HYMB	amphibian	Amphibia	Hymenochirus	boettgeri	NA	ZAIRE DWARF CLAWED	FROG	LIV	1000	NO	110	HK	HK	T	W	C	C	2000-07-06	2000	2000-07-06	2000	I	TP	5-D TROPICAL, INC.	WUN FAT AQUARIUM	NA	Hymenochirus boettgeri	Hymenochirus boettgeri
2000173132	ANCT	amphibian	Amphibia	NA	NA	NA	NON-CITES	AMPHIBIANS	SPE	142	NO	0	ET	ET	S	W	C	C	2001-09-06	2001	2000-07-07	2000	I	DF	NA	NA	NA	Na na	NA
2000766842	RATI	amphibian	Amphibia	Hoplobatrachus	tigerinus	NA	INDIAN	BULLFROG	LEG	8505	KG	29213	VN	VN	T	C	C	C	2000-07-07	2000	2000-07-07	2000	I	NW	EXPACK SEAFOOD INC.	SPECIAL AQUATIC PRODUCTS IMP EXP COMPANY	NA	Hoplobatrachus tigerinus	Hoplobatrachus tigerinus
2000767041	RACA	amphibian	Amphibia	Rana	catesbeiana	NA	NA	BULLFROG	LIV	5000	NO	501	DO	DO	T	C	C	C	2000-07-17	2000	2000-07-07	2000	I	NW	TIN TIN FISH TRADING INC.	LIVE FROGS DOMINICANA	Original value in 'species' column: catesbeinana	Rana catesbeiana	Rana catesbeiana
2000774661	RMAC	amphibian	Amphibia	Rana	macrodon	NA	NA	BULLFROG	LEG	18370	KG	84782	ID	ID	T	W	C	C	2000-07-07	2000	2000-07-07	2000	I	LA	BEAVER STREET FISHERIES, INC.	PT. SUMBER PANGAN NUSANTARA	NA	Rana macrodon	NA
2000783504	HYMB	amphibian	Amphibia	Hymenochirus	boettgeri	NA	ZAIRE DWARF CLAWED	FROG	LIV	2000	NO	60	HK	HK	T	U	C	C	2000-07-07	2000	2000-07-07	2000	I	AT	FINN'S AQUATICS INC.	FORTUNE WIDE ASIA	NA	Hymenochirus boettgeri	Hymenochirus boettgeri
2000785435	RACA	amphibian	Amphibia	Rana	catesbeiana	NA	NA	BULLFROG	LIV	1470	KG	1029	CN	CN	T	W	C	C	2000-07-07	2000	2000-07-07	2000	I	NY	KIN YICK TRADING CORPORATION	ESTATE GALLEN INTERNATIONAL TRADE	Original value in 'species' column: catesbeinana	Rana catesbeiana	Rana catesbeiana
2000794572	RACA	amphibian	Amphibia	Rana	catesbeiana	NA	NA	BULLFROG	SPE	530	NO	457	MX	MX	T	W	C	C	2000-07-10	2000	2000-07-07	2000	I	NG	RANACO CORPORATION	P.A.M.E.E.S.A.	Original value in 'species' column: catesbeinana	Rana catesbeiana	Rana catesbeiana
2000794572	RAFO	amphibian	Amphibia	Rana	forreri	NA	FORRER'S GRASS	FROG	SPE	12364	NO	4590	MX	MX	T	W	C	C	2000-07-10	2000	2000-07-07	2000	I	NG	RANACO CORPORATION	P.A.M.E.E.S.A.	NA	Rana forreri	Rana forreri
2000774634	CYOR	amphibian	Amphibia	Cynops	orientalis	NA	CHINESE DWARF	NEWT	LIV	500	NO	25	CN	CN	T	W	C	C	2000-07-08	2000	2000-07-08	2000	I	LA	Z IMPORTS INC.	XIAOSHAN IMPORT & EXPORT CO.	NA	Cynops orientalis	Cynops orientalis
2000796430	CYPY	amphibian	Amphibia	Cynops	pyrrhogaster	NA	JAPANESE FIREBELLY	NEWT	LIV	600	NO	66	HK	HK	T	W	C	C	2000-07-11	2000	2000-07-08	2000	I	NY	TRANSSHIP DISCOUNTS LTD.	UNION TROPICAL FISH FARM	NA	Cynops pyrrhogaster	Cynops pyrrhogaster
2000796430	XELA	amphibian	Amphibia	Xenopus	laevis	NA	AFRICAN CLAWED	TOAD	LIV	2850	NO	513	HK	HK	T	W	C	C	2000-07-11	2000	2000-07-08	2000	I	NY	TRANSSHIP DISCOUNTS LTD.	UNION TROPICAL FISH FARM	NA	Xenopus laevis	Xenopus laevis
2000802463	CYPY	amphibian	Amphibia	Cynops	pyrrhogaster	NA	JAPANESE FIREBELLY	NEWT	LIV	400	NO	156	HK	HK	T	W	C	C	2000-07-10	2000	2000-07-08	2000	I	NY	ERDA INC.	BROTHER AQUARIUM	NA	Cynops pyrrhogaster	Cynops pyrrhogaster
2000802463	HYMC	amphibian	Amphibia	Hymenochirus	curtipes	NA	W. DWARF CLAWED	FROG	LIV	800	NO	176	HK	HK	T	W	C	C	2000-07-10	2000	2000-07-08	2000	I	NY	ERDA INC.	BROTHER AQUARIUM	NA	Hymenochirus curtipes	Hymenochirus curtipes
2000767034	RACA	amphibian	Amphibia	Rana	catesbeiana	NA	NA	BULLFROG	LIV	5000	NO	501	DO	DO	T	C	C	C	2000-07-17	2000	2000-07-09	2000	I	NW	TIN TIN FISH TRADING INC.	LIVE FROGS DOMINICANA	Original value in 'species' column: catesbeinana	Rana catesbeiana	Rana catesbeiana
2000774074	ANCT	amphibian	Amphibia	NA	NA	NA	NON-CITES	AMPHIBIANS	LIV	1299	NO	1949	ID	ID	T	W	C	C	2000-07-09	2000	2000-07-09	2000	I	LA	AQUA-NAUTIC SPECIALIST	PT BEKAEL ESKA GEMILANG	NA	Na na	NA
2000774099	HYMC	amphibian	Amphibia	Hymenochirus	curtipes	NA	W. DWARF CLAWED	FROG	LIV	1600	NO	640	SG	SG	T	W	C	C	2000-07-09	2000	2000-07-09	2000	I	LA	AQUA-NAUTIC SPECIALIST	AQUANAUTICS SPECIALIST PTE LTD	NA	Hymenochirus curtipes	Hymenochirus curtipes
2000774263	CYOR	amphibian	Amphibia	Cynops	orientalis	NA	CHINESE DWARF	NEWT	LIV	1275	NO	147	HK	HK	T	W	C	C	2000-07-09	2000	2000-07-09	2000	I	LA	DOLPHIN INTERNATIONAL	SANWOO FISHERIES	NA	Cynops orientalis	Cynops orientalis
2000774263	HYMC	amphibian	Amphibia	Hymenochirus	curtipes	NA	W. DWARF CLAWED	FROG	LIV	3360	NO	403	HK	HK	T	C	C	C	2000-07-09	2000	2000-07-09	2000	I	LA	DOLPHIN INTERNATIONAL	SANWOO FISHERIES	NA	Hymenochirus curtipes	Hymenochirus curtipes
2000774266	CYOR	amphibian	Amphibia	Cynops	orientalis	NA	CHINESE DWARF	NEWT	LIV	100	NO	32	HK	KH	T	C	C	C	2000-07-09	2000	2000-07-09	2000	I	LA	DOLPHIN INTERNATIONAL	UNION TROPICAL FISH FARM LTD	NA	Cynops orientalis	Cynops orientalis
2000774275	BOOR	amphibian	Amphibia	Bombina	orientalis	NA	ORIENTAL FIREBELLY	TOAD	LIV	2100	NO	755	CN	CN	T	C	C	C	2000-07-09	2000	2000-07-09	2000	I	LA	DOLPHIN INTERNATIONAL	SHANGHAI GOLDEN FIELD	NA	Bombina orientalis	Bombina orientalis
2000774275	CYPY	amphibian	Amphibia	Cynops	pyrrhogaster	NA	JAPANESE FIREBELLY	NEWT	LIV	4500	NO	434	CN	CN	T	C	C	C	2000-07-09	2000	2000-07-09	2000	I	LA	DOLPHIN INTERNATIONAL	SHANGHAI GOLDEN FIELD	NA	Cynops pyrrhogaster	Cynops pyrrhogaster
2000774275	PACB	amphibian	Amphibia	Pachytriton	brevipes	NA	TSITOU	NEWT	LIV	400	NO	168	CN	CN	T	C	C	C	2000-07-09	2000	2000-07-09	2000	I	LA	DOLPHIN INTERNATIONAL	SHANGHAI GOLDEN FIELD	NA	Pachytriton brevipes	Pachytriton brevipes
2000774278	HYMC	amphibian	Amphibia	Hymenochirus	curtipes	NA	W. DWARF CLAWED	FROG	LIV	300	NO	24	ID	ID	T	W	C	C	2000-07-09	2000	2000-07-09	2000	I	LA	DOLPHIN INTERNATIONAL	P.T. VIVARIA INDONESIA	NA	Hymenochirus curtipes	Hymenochirus curtipes
2000774278	LICA	amphibian	Amphibia	Litoria	caerulea	NA	WHITE'S TREE	FROG	LIV	90	NO	130	ID	ID	T	W	C	C	2000-07-09	2000	2000-07-09	2000	I	LA	DOLPHIN INTERNATIONAL	P.T. VIVARIA INDONESIA	NA	Litoria caerulea	Litoria caerulea
2000774278	OOLI	amphibian	Amphibia	Occidozyga	lima	NA	PADDY	FROG	LIV	300	NO	15	ID	ID	T	W	C	C	2000-07-09	2000	2000-07-09	2000	I	LA	DOLPHIN INTERNATIONAL	P.T. VIVARIA INDONESIA	Original value in 'genus' column: ooedozyga	Occidozyga lima	Occidozyga lima
2000774285	OOLI	amphibian	Amphibia	Occidozyga	lima	NA	PADDY	FROG	LIV	900	NO	36	ID	ID	T	W	C	C	2000-07-09	2000	2000-07-09	2000	I	LA	DOLPHIN INTERNATIONAL	VIVAJAYA INTERNATIONAL	Original value in 'genus' column: ooedozyga	Occidozyga lima	Occidozyga lima
2000774626	HYMB	amphibian	Amphibia	Hymenochirus	boettgeri	NA	ZAIRE DWARF CLAWED	FROG	LIV	300	NO	33	HK	HK	T	C	C	C	2000-07-09	2000	2000-07-09	2000	I	LA	GLOBAL AQUATIC CONSULTING	BOKO EXPRESS COMPANY	NA	Hymenochirus boettgeri	Hymenochirus boettgeri
2000775171	HYMC	amphibian	Amphibia	Hymenochirus	curtipes	NA	W. DWARF CLAWED	FROG	LIV	2000	NO	457	HK	HK	T	W	C	C	2000-07-09	2000	2000-07-09	2000	I	LA	AQUACO, INC.	DRAGON FISHERIES	NA	Hymenochirus curtipes	Hymenochirus curtipes
2000168538	BUVI	amphibian	Amphibia	Bufo	viridis	NA	EUROPEAN GREEN	TOAD	LIV	75	NO	26	EG	EG	T	W	C	C	2000-07-07	2000	2000-07-10	2000	I	MI	PORT ROYALE TRADING CO., INC.	PYRAMID EXPORT	NA	Bufo viridis	NA
2000805623	RACA	amphibian	Amphibia	Rana	catesbeiana	NA	NA	BULLFROG	LIV	1000	KG	1000	BR	BR	T	C	C	C	2000-07-11	2000	2000-07-10	2000	I	NY	KIN YICK TRADING CORPORATION	RANAJAX IMPORT & EXPORT	Original value in 'species' column: catesbeinana	Rana catesbeiana	Rana catesbeiana
2000766660	RACA	amphibian	Amphibia	Rana	catesbeiana	NA	NA	BULLFROG	LIV	648	NO	189	DO	DO	T	C	C	C	2000-07-12	2000	2000-07-11	2000	I	NW	NORTH SEA TRADING CORPORATION	NA	Original value in 'species' column: catesbeinana	Rana catesbeiana	Rana catesbeiana
2000769859	XELA	amphibian	Amphibia	Xenopus	laevis	NA	AFRICAN CLAWED	TOAD	LIV	1800	NO	6120	CL	CL	T	W	C	C	2000-07-14	2000	2000-07-11	2000	I	CH	XENOPUS I, INC.	NA	NA	Xenopus laevis	Xenopus laevis
2000831041	DTRV	amphibian	Amphibia	Epipedobates	trivittatus	NA	THREE-STRIPED	POISON-ARROW FROG	LIV	38	NO	380	GY	GY	T	W	C	C	2000-07-11	2000	2000-07-11	2000	I	MI	BURGUNDY REPTILE TRADERS	NA	NA	Epipedobates trivittatus	Ameerega trivittata
2000900417	AGCL	amphibian	Amphibia	Agalychnis	callidryas	NA	RED-EYED TREE	FROG	LIV	200	NO	1400	NI	NI	T	C	C	C	2000-07-11	2000	2000-07-11	2000	I	MI	EMERALD CORAL & REPTILE	ZOONICA S.A.	NA	Agalychnis callidryas	Agalychnis callidryas
2000752577	BMAR	amphibian	Amphibia	Bufo	marinus	NA	NEOTROPICAL	TOAD	BOD	10	NO	85	XX	AU	T	W	R	A	2000-07-18	2000	2000-07-12	2000	I	DF	ABOUT AUSTRALIA USA PTY LTD INC	ABOUT AUSTRALIA PTY LTD	NA	Bufo marinus	NA
2000769531	BOOR	amphibian	Amphibia	Bombina	orientalis	NA	ORIENTAL FIREBELLY	TOAD	LIV	200	NO	20	CN	CN	T	W	C	C	2000-07-14	2000	2000-07-12	2000	I	NY	MIN HUA ENTERPRISE, INC.	SHANGHAI ESWEIL ENTERPRISE	NA	Bombina orientalis	Bombina orientalis
2000773939	KALO	amphibian	Amphibia	Kaloula	pulchra	NA	ASIATIC PAINTED	FROG	LIV	1055	NO	597	TH	TH	T	W	C	C	2000-07-12	2000	2000-07-12	2000	I	LA	PETS INTERNATIONAL	ASIA WORLD WIDE IMPORT AND EXPORT	NA	Kaloula pulchra	Kaloula pulchra
2000775619	HEMM	amphibian	Amphibia	Hemisus	marmoratus	NA	MARBLED SHOVELNOSE	FROG	LIV	138	NO	69	TZ	TZ	T	W	C	C	2000-07-12	2000	2000-07-12	2000	I	LA	L. A. REPTILE	KISASE INVESTMENTS	NA	Hemisus marmoratus	Hemisus marmoratus
2000775619	PBIF	amphibian	Amphibia	Phrynomantis	bifasciatus	NA	S AFR SNAKE-NECK	FROG	LIV	189	NO	94	TZ	TZ	T	W	C	C	2000-07-12	2000	2000-07-12	2000	I	LA	L. A. REPTILE	KISASE INVESTMENTS	NA	Phrynomantis bifasciatus	Phrynomantis bifasciatus
2000787120	PBIF	amphibian	Amphibia	Phrynomantis	bifasciatus	NA	S AFR SNAKE-NECK	FROG	LIV	50	NO	25	TZ	TZ	T	W	C	C	2000-07-12	2000	2000-07-12	2000	I	SE	OLIVIER ALLEN MOI COMPANY	ASSAM ENTERPRISE	NA	Phrynomantis bifasciatus	Phrynomantis bifasciatus
2000809328	HYMB	amphibian	Amphibia	Hymenochirus	boettgeri	NA	ZAIRE DWARF CLAWED	FROG	LIV	1000	NO	110	HK	HK	T	U	C	C	2000-07-12	2000	2000-07-12	2000	I	TP	5-D TROPICAL, INC.	WUN FAT AQUARIUM	NA	Hymenochirus boettgeri	Hymenochirus boettgeri
2000256993	KALO	amphibian	Amphibia	Kaloula	pulchra	NA	ASIATIC PAINTED	FROG	LIV	110	NO	44	VN	VN	T	W	C	C	2000-07-13	2000	2000-07-13	2000	I	MI	SOUTH FLORIDA REPTILE EXCHANGE	CORIMEX - PHU YEIN PROVINCE. VIETNAM	NA	Kaloula pulchra	Kaloula pulchra
2000788968	RACA	amphibian	Amphibia	Rana	catesbeiana	NA	NA	BULLFROG	LIV	950	KG	950	EC	EC	T	C	C	C	2000-07-31	2000	2000-07-13	2000	I	NW	KIN YICK TRADING CORPORATION	VIVACOCE Y CIA	Original value in 'species' column: catesbeinana	Rana catesbeiana	Rana catesbeiana
2000788244	RACA	amphibian	Amphibia	Rana	catesbeiana	NA	NA	BULLFROG	LIV	984	NO	287	DO	DO	T	C	C	C	2000-08-30	2000	2000-07-14	2000	I	NW	NORTH SEA TRADING CORPORATION	HECTOR ANT. TORO	Original value in 'species' column: catesbeinana	Rana catesbeiana	Rana catesbeiana
2000788321	RACA	amphibian	Amphibia	Rana	catesbeiana	NA	NA	BULLFROG	LIV	539	KG	330	DO	DO	T	C	C	C	2000-08-04	2000	2000-07-14	2000	I	NW	TIN TIN FISH TRADING INC.	LIVE FROGSS	Original value in 'species' column: catesbeinana	Rana catesbeiana	Rana catesbeiana
2000789168	BUME	amphibian	Amphibia	Bufo	melanostictus	NA	BLACK-SPINED	TOAD	SKE	62	NO	490	CN	CN	T	W	C	C	2000-07-14	2000	2000-07-14	2000	I	BA	C & A SCIENTIFIC CO., INC.	SHANGHAI CHANGHONG INTERNATIONAL TRADING COMPANY L	NA	Bufo melanostictus	Duttaphrynus melanostictus
2000796545	RACA	amphibian	Amphibia	Rana	catesbeiana	NA	NA	BULLFROG	LIV	1000	KG	1000	BR	BR	T	W	C	C	2000-07-14	2000	2000-07-14	2000	I	NY	KIN YICK TRADING CORPORATION	RANAJAX IMPORT & EXPORT	Original value in 'species' column: catesbeinana	Rana catesbeiana	Rana catesbeiana
2000776698	CYPY	amphibian	Amphibia	Cynops	pyrrhogaster	NA	JAPANESE FIREBELLY	NEWT	LIV	150	NO	17	HK	MK	T	W	C	C	2000-07-17	2000	2000-07-15	2000	I	NY	TRANSSHIP DISCOUNTS LTD.	UNION TROPICAL FISH FARM	NA	Cynops pyrrhogaster	Cynops pyrrhogaster
2000776698	XELA	amphibian	Amphibia	Xenopus	laevis	NA	AFRICAN CLAWED	TOAD	LIV	625	NO	94	HK	MK	T	W	C	C	2000-07-17	2000	2000-07-15	2000	I	NY	TRANSSHIP DISCOUNTS LTD.	UNION TROPICAL FISH FARM	NA	Xenopus laevis	Xenopus laevis
2000792528	PHBC	amphibian	Amphibia	Phyllomedusa	bicolor	NA	GIANT MONKEY	FROG	LIV	25	NO	125	SR	SR	T	W	C	C	2000-07-15	2000	2000-07-15	2000	I	SE	OLIVER ALLEN-MOI COMPANY	ALPHA EXOTICS	NA	Phyllomedusa bicolor	Phyllomedusa bicolor
2000792528	PHHP	amphibian	Amphibia	Phyllomedusa	hypocondrialis	NA	ORANGE-LEGGED LEAF	FROG	LIV	55	NO	66	SR	SR	T	W	C	C	2000-07-15	2000	2000-07-15	2000	I	SE	OLIVER ALLEN-MOI COMPANY	ALPHA EXOTICS	NA	Phyllomedusa hypocondrialis	NA
2000771388	CYOR	amphibian	Amphibia	Cynops	orientalis	NA	CHINESE DWARF	NEWT	LIV	2475	NO	252	CN	HK	T	W	C	C	2000-07-16	2000	2000-07-16	2000	I	LA	DOLPHIN INTERNATIONAL	SANWOO FISHERIES	NA	Cynops orientalis	Cynops orientalis
2000771388	HYMC	amphibian	Amphibia	Hymenochirus	curtipes	NA	W. DWARF CLAWED	FROG	LIV	26600	NO	3192	XX	HK	T	C	C	C	2000-07-16	2000	2000-07-16	2000	I	LA	DOLPHIN INTERNATIONAL	SANWOO FISHERIES	NA	Hymenochirus curtipes	Hymenochirus curtipes
2000771388	TYVE	amphibian	Amphibia	Tylototriton	verrucosus	NA	CROCODILE	NEWT	LIV	150	NO	203	CN	HK	T	W	C	C	2000-07-16	2000	2000-07-16	2000	I	LA	DOLPHIN INTERNATIONAL	SANWOO FISHERIES	NA	Tylototriton verrucosus	Tylototriton verrucosus
2000771396	BOOR	amphibian	Amphibia	Bombina	orientalis	NA	ORIENTAL FIREBELLY	TOAD	LIV	1900	NO	602	CN	CN	T	W	C	C	2000-07-16	2000	2000-07-16	2000	I	LA	DOLPHIN INTERNATIONAL	SHANGHAI GOLDEN FIELD GARDENING COMPANY LTD.	NA	Bombina orientalis	Bombina orientalis
2000771396	CYPY	amphibian	Amphibia	Cynops	pyrrhogaster	NA	JAPANESE FIREBELLY	NEWT	LIV	5400	NO	517	CN	CN	T	W	C	C	2000-07-16	2000	2000-07-16	2000	I	LA	DOLPHIN INTERNATIONAL	SHANGHAI GOLDEN FIELD GARDENING COMPANY LTD.	NA	Cynops pyrrhogaster	Cynops pyrrhogaster
2000771750	HYMC	amphibian	Amphibia	Hymenochirus	curtipes	NA	W. DWARF CLAWED	FROG	LIV	3800	NO	84	HK	HK	T	W	C	C	2000-07-27	2000	2000-07-16	2000	I	NY	METROPOLITAN FISH COMPANY LLC	DRAGON FISHERIES	NA	Hymenochirus curtipes	Hymenochirus curtipes
2000772530	HYMC	amphibian	Amphibia	Hymenochirus	curtipes	NA	W. DWARF CLAWED	FROG	LIV	450	NO	36	ID	ID	T	W	C	C	2000-07-16	2000	2000-07-16	2000	I	LA	DOLPHIN INTERNATIONAL	P.T. VIVARIA INDONESIA	NA	Hymenochirus curtipes	Hymenochirus curtipes
2000772530	LICA	amphibian	Amphibia	Litoria	caerulea	NA	WHITE'S TREE	FROG	LIV	120	NO	240	ID	ID	T	W	C	C	2000-07-16	2000	2000-07-16	2000	I	LA	DOLPHIN INTERNATIONAL	P.T. VIVARIA INDONESIA	NA	Litoria caerulea	Litoria caerulea
2000772530	OOLI	amphibian	Amphibia	Occidozyga	lima	NA	PADDY	FROG	LIV	300	NO	15	ID	ID	T	W	C	C	2000-07-16	2000	2000-07-16	2000	I	LA	DOLPHIN INTERNATIONAL	P.T. VIVARIA INDONESIA	Original value in 'genus' column: ooedozyga	Occidozyga lima	Occidozyga lima
2000772534	OOLI	amphibian	Amphibia	Occidozyga	lima	NA	PADDY	FROG	LIV	450	NO	18	ID	ID	T	W	C	C	2000-07-16	2000	2000-07-16	2000	I	LA	DOLPHIN INTERNATIONAL	VIVAJAYA INTERNATIONAL	Original value in 'genus' column: ooedozyga	Occidozyga lima	Occidozyga lima
2000772547	CYOR	amphibian	Amphibia	Cynops	orientalis	NA	CHINESE DWARF	NEWT	LIV	300	NO	96	CN	HK	T	W	C	C	2000-07-16	2000	2000-07-16	2000	I	LA	DOLPHIN INTERNATIONAL	UNION TROPICAL FISH FARM LTD.	NA	Cynops orientalis	Cynops orientalis
2000775097	HYMC	amphibian	Amphibia	Hymenochirus	curtipes	NA	W. DWARF CLAWED	FROG	LIV	100	NO	40	SG	SG	T	W	C	C	2000-07-16	2000	2000-07-16	2000	I	LA	AQUACO, INC.	SUNRISE AQUARIUM PIT LTD	NA	Hymenochirus curtipes	Hymenochirus curtipes
2000775132	HYMC	amphibian	Amphibia	Hymenochirus	curtipes	NA	W. DWARF CLAWED	FROG	LIV	1600	NO	367	HK	HK	T	W	C	C	2000-07-16	2000	2000-07-16	2000	I	LA	AQUACO, INC.	DRAGON FISHERIES	NA	Hymenochirus curtipes	Hymenochirus curtipes
2000775211	HYMC	amphibian	Amphibia	Hymenochirus	curtipes	NA	W. DWARF CLAWED	FROG	LIV	1500	NO	600	SG	SG	T	W	C	C	2000-07-16	2000	2000-07-16	2000	I	LA	AQUA-NAUTIC SPECIALIST	AQUANAUTICS SPECIALIST PTE LTD	NA	Hymenochirus curtipes	Hymenochirus curtipes
2000784966	BOOR	amphibian	Amphibia	Bombina	orientalis	NA	ORIENTAL FIREBELLY	TOAD	LIV	400	NO	110	CN	CN	T	W	C	C	2000-07-16	2000	2000-07-16	2000	I	NY	FISH MART INC.	SHANGHAI INTERNATIONAL TRADE AND SERVICE	NA	Bombina orientalis	Bombina orientalis
2000784966	CYPY	amphibian	Amphibia	Cynops	pyrrhogaster	NA	JAPANESE FIREBELLY	NEWT	LIV	400	NO	108	CN	CN	T	W	C	C	2000-07-16	2000	2000-07-16	2000	I	NY	FISH MART INC.	SHANGHAI INTERNATIONAL TRADE AND SERVICE	NA	Cynops pyrrhogaster	Cynops pyrrhogaster
2000788789	RACA	amphibian	Amphibia	Rana	catesbeiana	NA	NA	BULLFROG	LIV	5000	NO	350	DO	DO	T	C	C	C	2000-07-28	2000	2000-07-16	2000	I	NW	TIN TIN FISH TRADING INC.	LIVE FROGSS	Original value in 'species' column: catesbeinana	Rana catesbeiana	Rana catesbeiana
2000788560	RACA	amphibian	Amphibia	Rana	catesbeiana	NA	NA	BULLFROG	LIV	44000	NO	47610	TW	TW	T	W	C	C	2000-07-17	2000	2000-07-17	2000	I	SF	NOR-CAL SEAFOOD INC.	PENSETO SEAFOOD COMPANY, LTD	Original value in 'species' column: catesbeinana	Rana catesbeiana	Rana catesbeiana
2000771665	ANCT	amphibian	Amphibia	NA	NA	NA	NON-CITES	AMPHIBIANS	LIV	1804	NO	6086	MX	MX	T	W	C	C	2000-07-18	2000	2000-07-18	2000	I	LA	SANDFIRE DRAGON RANCH	GRNAJA BIOMAT DEL CARIBE	NA	Na na	NA
2000771665	TRPT	amphibian	Amphibia	Triprion	petasatus	NA	YUC SHOV-HEAD TREE	FROG	LIV	365	NO	1277	MX	MX	T	W	C	C	2000-07-18	2000	2000-07-18	2000	I	LA	SANDFIRE DRAGON RANCH	GRNAJA BIOMAT DEL CARIBE	NA	Triprion petasatus	Triprion petasatus
2000800873	AGCL	amphibian	Amphibia	Agalychnis	callidryas	NA	RED-EYED TREE	FROG	LIV	100	NO	700	NI	NI	T	C	C	C	2000-07-18	2000	2000-07-18	2000	I	MI	EMERALD CORAL & REPTILE	ZOONICA, S.A.	NA	Agalychnis callidryas	Agalychnis callidryas
2000801004	AGCL	amphibian	Amphibia	Agalychnis	callidryas	NA	RED-EYED TREE	FROG	LIV	100	NO	175	NI	NI	T	C	C	C	2000-07-18	2000	2000-07-18	2000	I	MI	NA	EXPANSA	NA	Agalychnis callidryas	Agalychnis callidryas
2000801004	DEAU	amphibian	Amphibia	Dendrobates	auratus	NA	GREEN	POISON-ARROW FROG	LIV	200	NO	400	NI	NI	T	R	C	C	2000-07-18	2000	2000-07-18	2000	I	MI	NA	EXPANSA	NA	Dendrobates auratus	Dendrobates auratus
2000801004	DPUM	amphibian	Amphibia	Dendrobates	pumilio	NA	STRAWBERRY	POISON-ARROW FROG	LIV	400	NO	800	NI	NI	T	R	C	C	2000-07-18	2000	2000-07-18	2000	I	MI	NA	EXPANSA	NA	Dendrobates pumilio	Oophaga pumilio
2000805784	RACA	amphibian	Amphibia	Rana	catesbeiana	NA	NA	BULLFROG	LIV	1000	KG	1000	BR	BR	T	C	C	C	2000-07-19	2000	2000-07-18	2000	I	NY	KIN YICK TRADING CORPORATION	RANAJAX IMPORT & EXPORT	Original value in 'species' column: catesbeinana	Rana catesbeiana	Rana catesbeiana
2000815918	KALO	amphibian	Amphibia	Kaloula	pulchra	NA	ASIATIC PAINTED	FROG	LIV	200	NO	60	VN	VN	T	W	C	C	2000-07-18	2000	2000-07-18	2000	I	LA	GAMA SUPPLIERS, INC.	VINAFOR HANOI	NA	Kaloula pulchra	Kaloula pulchra
2000815918	RLEU	amphibian	Amphibia	Rhacophorus	leucomystax	NA	FLYING	FROG	LIV	200	NO	60	VN	VN	T	W	C	C	2000-07-18	2000	2000-07-18	2000	I	LA	GAMA SUPPLIERS, INC.	VINAFOR HANOI	NA	Rhacophorus leucomystax	NA
2000770891	CYOR	amphibian	Amphibia	Cynops	orientalis	NA	CHINESE DWARF	NEWT	LIV	100	NO	5	CN	CN	T	W	C	C	2000-07-26	2000	2000-07-19	2000	I	NY	MIN HUA ENTERPRISE, INC.	SHANGHAI ESWELL ENTERPRISES COMPANY, LTD	NA	Cynops orientalis	Cynops orientalis
2000788798	RACA	amphibian	Amphibia	Rana	catesbeiana	NA	NA	BULLFROG	LIV	5000	NO	320	DO	DO	T	C	C	C	2000-07-28	2000	2000-07-19	2000	I	NW	TIN TIN FISH TRADING INC.	LIVE FROGSS	Original value in 'species' column: catesbeinana	Rana catesbeiana	Rana catesbeiana
2000817601	BOOR	amphibian	Amphibia	Bombina	orientalis	NA	ORIENTAL FIREBELLY	TOAD	LIV	2000	NO	250	CN	CN	T	W	C	C	2000-07-19	2000	2000-07-19	2000	I	LA	GOLDEN POND	XIAOSHAN IMP & EXP CORP	NA	Bombina orientalis	Bombina orientalis
2000818960	RACA	amphibian	Amphibia	Rana	catesbeiana	NA	NA	BULLFROG	LIV	2500	NO	1040	TW	TW	T	W	C	C	2000-07-26	2000	2000-07-19	2000	I	NY	HOY LUNG SEAFOOD CORPORATION	HORREI FISHERY CO	Original value in 'species' column: catesbeinana	Rana catesbeiana	Rana catesbeiana
2000775049	RACA	amphibian	Amphibia	Rana	catesbeiana	NA	NA	BULLFROG	LIV	8165	KG	44135	TW	TW	T	W	C	C	2000-07-19	2000	2000-07-20	2000	I	LA	SEA PORT PRODUCTS CORP.	FOREVER FROZEN SEAFOODS, INC.	Original value in 'species' column: catesbeinana	Rana catesbeiana	Rana catesbeiana
2000779591	AGCL	amphibian	Amphibia	Agalychnis	callidryas	NA	RED-EYED TREE	FROG	LIV	604	NO	4681	GT	GT	T	W	C	C	2000-07-20	2000	2000-07-20	2000	I	MI	EMERALD CORAL & REPTILE	PRODUCTOR AGRICOLAS S.A.	NA	Agalychnis callidryas	Agalychnis callidryas
2000809356	HYMB	amphibian	Amphibia	Hymenochirus	boettgeri	NA	ZAIRE DWARF CLAWED	FROG	LIV	1000	NO	110	HK	HK	T	U	C	C	2000-07-20	2000	2000-07-20	2000	I	TP	5-D TROPICAL, INC.	WUN FAT AQUARIUM	NA	Hymenochirus boettgeri	Hymenochirus boettgeri
2000819845	AGCL	amphibian	Amphibia	Agalychnis	callidryas	NA	RED-EYED TREE	FROG	LIV	88	NO	1320	NI	JP	T	W	C	C	2000-07-20	2000	2000-07-20	2000	I	SF	WONDERFUL WORLD PET SUPPLIERS	REP JAPAN	NA	Agalychnis callidryas	Agalychnis callidryas
2000850507	RACA	amphibian	Amphibia	Rana	catesbeiana	NA	NA	BULLFROG	LIV	1000	KG	1000	BR	BR	T	W	C	C	2000-07-21	2000	2000-07-20	2000	I	NY	KIN YICK TRADING CORPORATION	RANAJAX IMPORT & EXPORT	Original value in 'species' column: catesbeinana	Rana catesbeiana	Rana catesbeiana
2000788941	RACA	amphibian	Amphibia	Rana	catesbeiana	NA	NA	BULLFROG	LIV	1116	NO	325	DO	DO	T	C	C	C	2000-07-31	2000	2000-07-21	2000	I	NW	NORTH SEA TRADING CORPORATION	HECTOR ANT. TORO	Original value in 'species' column: catesbeinana	Rana catesbeiana	Rana catesbeiana
2000788943	RACA	amphibian	Amphibia	Rana	catesbeiana	NA	NA	BULLFROG	LIV	669	KG	456	DO	DO	T	C	C	C	2000-07-31	2000	2000-07-21	2000	I	NW	TIN TIN FISH TRADING INC.	LIVE FROGS	Original value in 'species' column: catesbeinana	Rana catesbeiana	Rana catesbeiana
2000794553	RACA	amphibian	Amphibia	Rana	catesbeiana	NA	NA	BULLFROG	SPE	591	NO	1320	MX	MX	T	W	C	C	2000-07-21	2000	2000-07-21	2000	I	NG	RANACO CORPORATION	P.A.M.E.E.S.A.	Original value in 'species' column: catesbeinana	Rana catesbeiana	Rana catesbeiana
2000794553	RAFO	amphibian	Amphibia	Rana	forreri	NA	FORRER'S GRASS	FROG	SPE	27107	NO	9468	MX	MX	T	W	C	C	2000-07-21	2000	2000-07-21	2000	I	NG	RANACO CORPORATION	P.A.M.E.E.S.A.	NA	Rana forreri	Rana forreri
2000770788	CYPY	amphibian	Amphibia	Cynops	pyrrhogaster	NA	JAPANESE FIREBELLY	NEWT	LIV	725	NO	80	HK	HK	T	W	C	C	2000-07-24	2000	2000-07-22	2000	I	NY	TRANSSHIP DISCOUNTS LTD.	UNION TROPICAL FISH FARM	NA	Cynops pyrrhogaster	Cynops pyrrhogaster
2000770788	XELA	amphibian	Amphibia	Xenopus	laevis	NA	AFRICAN CLAWED	TOAD	LIV	3500	NO	385	HK	HK	T	W	C	C	2000-07-24	2000	2000-07-22	2000	I	NY	TRANSSHIP DISCOUNTS LTD.	UNION TROPICAL FISH FARM	NA	Xenopus laevis	Xenopus laevis
2000774523	LICA	amphibian	Amphibia	Litoria	caerulea	NA	WHITE'S TREE	FROG	LIV	1695	NO	1913	ID	ID	T	W	C	C	2000-07-22	2000	2000-07-22	2000	I	LA	AQUA-NAUTIC SPECIALIST	P.T. BEKAEL ESKA GEMILANG	NA	Litoria caerulea	Litoria caerulea
2000775016	BOOR	amphibian	Amphibia	Bombina	orientalis	NA	ORIENTAL FIREBELLY	TOAD	LIV	2000	NO	300	CN	CN	T	R	C	C	2000-07-22	2000	2000-07-22	2000	I	LA	Z IMPORTS INC.	XIAOSHAN IMPORT AND EXPORT CO.	NA	Bombina orientalis	Bombina orientalis
2000784942	HYMC	amphibian	Amphibia	Hymenochirus	curtipes	NA	W. DWARF CLAWED	FROG	LIV	600	NO	132	HK	HK	T	W	C	C	2000-07-22	2000	2000-07-22	2000	I	NY	ERDA INC.	BROTHER AQUARIUM	NA	Hymenochirus curtipes	Hymenochirus curtipes
2000771004	OOLI	amphibian	Amphibia	Occidozyga	lima	NA	PADDY	FROG	LIV	150	NO	14	ID	ID	T	W	C	C	2000-07-24	2000	2000-07-23	2000	I	NY	TRANSSHIP DISCOUNTS LTD.	VIVAJAYA INTERNATIONAL	Original value in 'genus' column: ooedozyga	Occidozyga lima	Occidozyga lima
2000771360	HYMC	amphibian	Amphibia	Hymenochirus	curtipes	NA	W. DWARF CLAWED	FROG	LIV	1600	NO	640	SG	SG	T	W	C	C	2000-07-23	2000	2000-07-23	2000	I	LA	AQUA-NAUTIC SPECIALIST	AQUANAUTICS SPECIALIST PTE LTD.	NA	Hymenochirus curtipes	Hymenochirus curtipes
2000773715	HYMC	amphibian	Amphibia	Hymenochirus	curtipes	NA	W. DWARF CLAWED	FROG	LIV	1600	NO	352	HK	HK	T	W	C	C	2000-07-23	2000	2000-07-23	2000	I	LA	AQUACO, INC.	DRAGON FISHERIES	NA	Hymenochirus curtipes	Hymenochirus curtipes
2000775592	OOLI	amphibian	Amphibia	Occidozyga	lima	NA	PADDY	FROG	LIV	600	NO	30	ID	ID	T	W	C	C	2000-07-23	2000	2000-07-23	2000	I	LA	DOLPHIN INTERNATIONAL	PT VIVARIA INDONESIA	Original value in 'genus' column: ooedozyga	Occidozyga lima	Occidozyga lima
2000775595	OOLI	amphibian	Amphibia	Occidozyga	lima	NA	PADDY	FROG	LIV	600	NO	24	ID	ID	T	W	C	C	2000-07-23	2000	2000-07-23	2000	I	LA	DOLPHIN INTERNATIONAL	VIVAJAYA INTL	Original value in 'genus' column: ooedozyga	Occidozyga lima	Occidozyga lima
2000781314	CYPY	amphibian	Amphibia	Cynops	pyrrhogaster	NA	JAPANESE FIREBELLY	NEWT	LIV	5100	NO	490	CN	CN	T	W	C	C	2000-07-23	2000	2000-07-23	2000	I	LA	DOLPHIN INTERNATIONAL	SHANGHAI GOLDEN FIELD GARDENING COMPANY, LTD	NA	Cynops pyrrhogaster	Cynops pyrrhogaster
2000784859	HYMC	amphibian	Amphibia	Hymenochirus	curtipes	NA	W. DWARF CLAWED	FROG	LIV	800	NO	96	CN	CN	T	W	C	C	2000-07-23	2000	2000-07-23	2000	I	NY	TRI-COUNTY TROPICALS, INC.	CORNWALL AQUATICS	NA	Hymenochirus curtipes	Hymenochirus curtipes
2000788942	RACA	amphibian	Amphibia	Rana	catesbeiana	NA	NA	BULLFROG	LIV	499	KG	301	DO	DO	T	C	C	C	2000-07-31	2000	2000-07-23	2000	I	NW	TIN TIN FISH TRADING INC.	LIVE FROGS	Original value in 'species' column: catesbeinana	Rana catesbeiana	Rana catesbeiana
2000790569	CYOR	amphibian	Amphibia	Cynops	orientalis	NA	CHINESE DWARF	NEWT	LIV	300	NO	84	HK	HK	T	W	C	C	2000-07-23	2000	2000-07-23	2000	I	LA	DOLPHIN INTERNATIONAL	SANWOO FISHERIES	NA	Cynops orientalis	Cynops orientalis
2000790569	TYVE	amphibian	Amphibia	Tylototriton	verrucosus	NA	CROCODILE	NEWT	LIV	200	NO	270	HK	HK	T	W	C	C	2000-07-23	2000	2000-07-23	2000	I	LA	DOLPHIN INTERNATIONAL	SANWOO FISHERIES	NA	Tylototriton verrucosus	Tylototriton verrucosus
2000755236	AGCL	amphibian	Amphibia	Agalychnis	callidryas	NA	RED-EYED TREE	FROG	LIV	82	NO	492	NI	NI	T	W	R	A	2000-07-28	2000	2000-07-24	2000	I	LA	R. H. PET INCORPORATED	FAUMARNICA & CIA. LTD.	NA	Agalychnis callidryas	Agalychnis callidryas
2000755236	AGCL	amphibian	Amphibia	Agalychnis	callidryas	NA	RED-EYED TREE	FROG	LIV	26	NO	156	NI	NI	T	W	C	C	2000-07-28	2000	2000-07-24	2000	I	LA	R. H. PET INCORPORATED	FAUMARNICA & CIA. LTD.	NA	Agalychnis callidryas	Agalychnis callidryas
2000773734	LARG	amphibian	Amphibia	Leptopelis	argenteus	NA	BAGAM. FOREST TREE	FROG	LIV	50	NO	100	TZ	TZ	T	W	C	C	2000-07-24	2000	2000-07-24	2000	I	LA	INTERNATIONAL DRAGON BREEDERS INC	GRECHANT TANZANIA LTD	NA	Leptopelis argenteus	Leptopelis argenteus
2000791897	RACA	amphibian	Amphibia	Rana	catesbeiana	NA	NA	BULLFROG	LIV	8000	NO	1000	BR	BR	T	W	C	C	2000-07-24	2000	2000-07-24	2000	I	NY	KIN YICK TRADING CORPORATION	RANAJAX IMPORT & EXPORT	Original value in 'species' column: catesbeinana	Rana catesbeiana	Rana catesbeiana
2000862737	PBIF	amphibian	Amphibia	Phrynomantis	bifasciatus	NA	S AFR SNAKE-NECK	FROG	LIV	10	NO	4	GH	GH	T	W	C	C	2000-07-24	2000	2000-07-24	2000	I	AT	T.J.'S PETS, INC.	NOMAD COMMERCIAL	NA	Phrynomantis bifasciatus	Phrynomantis bifasciatus
2000788939	RACA	amphibian	Amphibia	Rana	catesbeiana	NA	NA	BULLFROG	LIV	1092	NO	318	DO	DO	T	C	C	C	2000-07-31	2000	2000-07-25	2000	I	NW	NORTH SEA TRADING CORPORATION	HECTOR ANT. TORO	Original value in 'species' column: catesbeinana	Rana catesbeiana	Rana catesbeiana
2000772096	RACA	amphibian	Amphibia	Rana	catesbeiana	NA	NA	BULLFROG	LIV	3000	NO	945	TW	TW	T	W	C	C	2000-07-28	2000	2000-07-26	2000	I	NY	HOY LUNG SEAFOOD CORPORATION	HORREI FISHERY COMPANY	Original value in 'species' column: catesbeinana	Rana catesbeiana	Rana catesbeiana
2000785151	BOOR	amphibian	Amphibia	Bombina	orientalis	NA	ORIENTAL FIREBELLY	TOAD	LIV	200	NO	20	CN	CN	T	W	C	C	2000-08-02	2000	2000-07-26	2000	I	NY	MIN HUA ENTERPRISE, INC.	SHANGHAI ESWELL ENTERPRISE, INC	NA	Bombina orientalis	Bombina orientalis
2000785151	CYOR	amphibian	Amphibia	Cynops	orientalis	NA	CHINESE DWARF	NEWT	LIV	100	NO	5	CN	CN	T	W	C	C	2000-08-02	2000	2000-07-26	2000	I	NY	MIN HUA ENTERPRISE, INC.	SHANGHAI ESWELL ENTERPRISE, INC	NA	Cynops orientalis	Cynops orientalis
2000786936	ANCT	amphibian	Amphibia	NA	NA	NA	NON-CITES	AMPHIBIANS	SPE	95	NO	0	XX	XX	S	W	C	C	2000-07-27	2000	2000-07-26	2000	I	HA	MUSEUM OF NATIONAL HISTORY	MUSEUM OF NATURAL HISTORY	NA	Na na	NA
2000794549	RACA	amphibian	Amphibia	Rana	catesbeiana	NA	NA	BULLFROG	SPE	670	NO	1375	MX	MX	T	W	C	C	2000-07-26	2000	2000-07-26	2000	I	NG	RANACO CORPORATION	P.A.M.E.E.S.A.	Original value in 'species' column: catesbeinana	Rana catesbeiana	Rana catesbeiana
2000794549	RAFO	amphibian	Amphibia	Rana	forreri	NA	FORRER'S GRASS	FROG	SPE	14710	NO	6755	MX	MX	T	W	C	C	2000-07-26	2000	2000-07-26	2000	I	NG	RANACO CORPORATION	P.A.M.E.E.S.A.	NA	Rana forreri	Rana forreri
2000812366	HYMC	amphibian	Amphibia	Hymenochirus	curtipes	NA	W. DWARF CLAWED	FROG	LIV	75	NO	24	SG	SG	T	W	C	C	2000-07-26	2000	2000-07-26	2000	I	LA	AQUA-NAUTIC SPECIALIST	AQUA NAUTICS SPECIALISTS PTE, LTD	NA	Hymenochirus curtipes	Hymenochirus curtipes
2000772746	AGCL	amphibian	Amphibia	Agalychnis	callidryas	NA	RED-EYED TREE	FROG	LIV	500	NO	1500	NI	NI	T	W	C	C	2000-07-28	2000	2000-07-27	2000	I	LA	L. A. REPTILE	BIO EXPORT	NA	Agalychnis callidryas	Agalychnis callidryas
2000788221	RACA	amphibian	Amphibia	Rana	catesbeiana	NA	NA	BULLFROG	LIV	900	NO	245	DO	DO	T	W	C	C	2000-08-03	2000	2000-07-27	2000	I	NW	NORTH SEA TRADING CORP.	HECTOR ANT. TORO	Original value in 'species' column: catesbeinana	Rana catesbeiana	Rana catesbeiana
2000789399	RACA	amphibian	Amphibia	Rana	catesbeiana	NA	NA	BULLFROG	LIV	531	KG	550	DO	DO	T	C	C	C	2000-08-11	2000	2000-07-27	2000	I	NW	TIN TIN FISH TRADING INC.	LIVE FROGS	Original value in 'species' column: catesbeinana	Rana catesbeiana	Rana catesbeiana
2000809292	HYMB	amphibian	Amphibia	Hymenochirus	boettgeri	NA	ZAIRE DWARF CLAWED	FROG	LIV	2000	NO	220	HK	HK	T	U	C	C	2000-07-27	2000	2000-07-27	2000	I	TP	5-D TROPICAL, INC.	WUN FAT AQUARIUM	NA	Hymenochirus boettgeri	Hymenochirus boettgeri
2000827814	HYMC	amphibian	Amphibia	Hymenochirus	curtipes	NA	W. DWARF CLAWED	FROG	LIV	100	NO	75	GH	GH	T	W	C	C	2000-07-27	2000	2000-07-27	2000	I	PT	ANYTHING WILD	OGUNS & CO	NA	Hymenochirus curtipes	Hymenochirus curtipes
2000772698	CEON	amphibian	Amphibia	Ceratophrys	ornata	NA	ORNATE HORNED	FROG	LIV	300	NO	1350	VA	VA	T	C	C	C	2000-07-28	2000	2000-07-28	2000	I	LA	CALIFORNIA ZOOLOGICAL SUPPLY	BION TERRARIUM CENTER	NA	Ceratophrys ornata	Ceratophrys ornata
2000784604	RACA	amphibian	Amphibia	Rana	catesbeiana	NA	NA	BULLFROG	LIV	2500	NO	756	TW	TW	T	W	C	C	2000-08-02	2000	2000-07-28	2000	I	NY	HOY LUNG SEAFOOD CORPORATION	HORREI FISHERY COMPANY	Original value in 'species' column: catesbeinana	Rana catesbeiana	Rana catesbeiana
2000967431	BOOA	amphibian	Amphibia	Boophis	albilabris	NA	WHT-LIP BRIGHT-EYE	FROG	LIV	30	NO	75	MG	MG	T	U	C	C	2000-07-28	2000	2000-07-28	2000	I	MI	NV PETS	RABARISON, WILLIAM	NA	Boophis albilabris	Boophis albilabris
2000967431	MAAU	amphibian	Amphibia	Mantella	aurantiaca	NA	MALAGASY GOLDEN	MANTELLA	LIV	30	NO	60	MG	MG	T	W	C	C	2000-07-28	2000	2000-07-28	2000	I	MI	NV PETS	RABARISON, WILLIAM	NA	Mantella aurantiaca	Mantella aurantiaca
2000967431	MANV	amphibian	Amphibia	Mantella	viridis	NA	GREEN GOLDEN	MANTELLA	LIV	30	NO	60	MG	MG	T	W	C	C	2000-07-28	2000	2000-07-28	2000	I	MI	NV PETS	RABARISON, WILLIAM	NA	Mantella viridis	Mantella viridis
2000967431	MMAD	amphibian	Amphibia	Mantella	madagascariensis	NA	MADAGASCAR GOLDEN	MANTELLA	LIV	40	NO	80	MG	MG	T	W	C	C	2000-07-28	2000	2000-07-28	2000	I	MI	NV PETS	RABARISON, WILLIAM	NA	Mantella madagascariensis	Mantella madagascariensis
2000967431	MNLA	amphibian	Amphibia	Mantella	laevigata	NA	FOLOHY GOLDEN	MANTELLA	LIV	30	NO	60	MG	MG	T	W	C	C	2000-07-28	2000	2000-07-28	2000	I	MI	NV PETS	RABARISON, WILLIAM	NA	Mantella laevigata	Mantella laevigata
2000967431	SPUS	amphibian	Amphibia	Scaphiophryne	pustulosa	NA	GREEN RAIN	FROG	LIV	30	NO	90	MG	MG	T	W	C	C	2000-07-28	2000	2000-07-28	2000	I	MI	NV PETS	RABARISON, WILLIAM	NA	Scaphiophryne pustulosa	NA
2000771574	BOOR	amphibian	Amphibia	Bombina	orientalis	NA	ORIENTAL FIREBELLY	TOAD	LIV	1500	NO	300	CN	CN	T	R	C	C	2000-07-29	2000	2000-07-29	2000	I	LA	Z IMPORTS INC.	XIAOSHAN IMPORT & EXPORT CO.	NA	Bombina orientalis	Bombina orientalis
2000789400	RACA	amphibian	Amphibia	Rana	catesbeiana	NA	NA	BULLFROG	LIV	1089	KG	612	DO	DO	T	C	C	C	2000-08-11	2000	2000-07-29	2000	I	NW	TIN TIN FISH TRADING INC.	LIVE FROGS	Original value in 'species' column: catesbeinana	Rana catesbeiana	Rana catesbeiana
2000754728	MAAU	amphibian	Amphibia	Mantella	aurantiaca	NA	MALAGASY GOLDEN	MANTELLA	LIV	98	NO	400	MG	MG	T	W	C	C	2000-07-03	2000	2000-07-30	2000	I	LA	INTERNATIONAL DRAGON BREEDERS INC	NA	NA	Mantella aurantiaca	Mantella aurantiaca
2000769270	OOLI	amphibian	Amphibia	Occidozyga	lima	NA	PADDY	FROG	LIV	75	NO	7	ID	ID	T	W	C	C	2000-07-31	2000	2000-07-30	2000	I	NY	TRANSSHIP DISCOUNTS LTD.	VIVAJAYA INTERNATIONAL	Original value in 'genus' column: ooedozyga	Occidozyga lima	Occidozyga lima
2000771311	HYMC	amphibian	Amphibia	Hymenochirus	curtipes	NA	W. DWARF CLAWED	FROG	LIV	400	NO	92	HK	HK	T	W	C	C	2000-07-30	2000	2000-07-30	2000	I	LA	AQUACO, INC.	DRAGON FISHERIES	NA	Hymenochirus curtipes	Hymenochirus curtipes
2000771535	HYMC	amphibian	Amphibia	Hymenochirus	curtipes	NA	W. DWARF CLAWED	FROG	LIV	1500	NO	600	SG	SG	T	W	C	C	2000-07-30	2000	2000-07-30	2000	I	LA	AQUA-NAUTIC SPECIALIST	AQUANAUTICS SPECIALIST PTE LTD	NA	Hymenochirus curtipes	Hymenochirus curtipes
2000771723	KALO	amphibian	Amphibia	Kaloula	pulchra	NA	ASIATIC PAINTED	FROG	LIV	160	NO	64	VN	VN	T	W	C	C	2000-07-30	2000	2000-07-30	2000	I	LA	UNIVERSAL AQUATIC	CORIMEX	NA	Kaloula pulchra	Kaloula pulchra
2000771723	OOLI	amphibian	Amphibia	Occidozyga	lima	NA	PADDY	FROG	LIV	70	NO	14	VN	VN	T	W	C	C	2000-07-30	2000	2000-07-30	2000	I	LA	UNIVERSAL AQUATIC	CORIMEX	Original value in 'genus' column: ooedozyga	Occidozyga lima	Occidozyga lima
2000771723	RLEU	amphibian	Amphibia	Rhacophorus	leucomystax	NA	FLYING	FROG	LIV	240	NO	96	VN	VN	T	W	C	C	2000-07-30	2000	2000-07-30	2000	I	LA	UNIVERSAL AQUATIC	CORIMEX	NA	Rhacophorus leucomystax	NA
2000772270	HYMC	amphibian	Amphibia	Hymenochirus	curtipes	NA	W. DWARF CLAWED	FROG	LIV	200	NO	22	HK	HK	T	W	C	C	2000-07-30	2000	2000-07-30	2000	I	LA	GLOBAL AQUATIC CONSULTING	GLOBAL AQUATICS CONSULTING	NA	Hymenochirus curtipes	Hymenochirus curtipes
2000772360	CYOR	amphibian	Amphibia	Cynops	orientalis	NA	CHINESE DWARF	NEWT	LIV	250	NO	78	HK	CA	T	R	C	C	2000-07-29	2000	2000-07-30	2000	I	LA	DOLPHIN INTERNATIONAL	AQUA-LIFE INTERNATIONAL	NA	Cynops orientalis	Cynops orientalis
2000772642	HYMC	amphibian	Amphibia	Hymenochirus	curtipes	NA	W. DWARF CLAWED	FROG	LIV	125	NO	25	HK	HK	T	W	C	C	2000-07-30	2000	2000-07-30	2000	I	LA	SALINAS, ADRIAN	CEYLON AQUARIUM	NA	Hymenochirus curtipes	Hymenochirus curtipes
2000773300	OOLI	amphibian	Amphibia	Occidozyga	lima	NA	PADDY	FROG	LIV	450	NO	18	ID	ID	T	W	C	C	2000-07-30	2000	2000-07-30	2000	I	LA	DOLPHIN INTERNATIONAL	VIVAJAYA INTERNATIONAL	Original value in 'genus' column: ooedozyga	Occidozyga lima	Occidozyga lima
2000773305	HYMC	amphibian	Amphibia	Hymenochirus	curtipes	NA	W. DWARF CLAWED	FROG	LIV	600	NO	60	ID	ID	T	W	C	C	2000-07-30	2000	2000-07-30	2000	I	LA	DOLPHIN INTERNATIONAL	VIVARIA INDONESIA P.T.	NA	Hymenochirus curtipes	Hymenochirus curtipes
2000773305	LICA	amphibian	Amphibia	Litoria	caerulea	NA	WHITE'S TREE	FROG	LIV	110	NO	260	ID	ID	T	W	C	C	2000-07-30	2000	2000-07-30	2000	I	LA	DOLPHIN INTERNATIONAL	VIVARIA INDONESIA P.T.	NA	Litoria caerulea	Litoria caerulea
2000773305	OOLI	amphibian	Amphibia	Occidozyga	lima	NA	PADDY	FROG	LIV	450	NO	23	ID	ID	T	W	C	C	2000-07-30	2000	2000-07-30	2000	I	LA	DOLPHIN INTERNATIONAL	VIVARIA INDONESIA P.T.	Original value in 'genus' column: ooedozyga	Occidozyga lima	Occidozyga lima
2000784464	BOOR	amphibian	Amphibia	Bombina	orientalis	NA	ORIENTAL FIREBELLY	TOAD	LIV	500	NO	135	CN	CN	T	W	C	C	2000-08-03	2000	2000-07-30	2000	I	NY	FISH MART INC.	SHANGHAI INTERNATIONAL TRADE	NA	Bombina orientalis	Bombina orientalis
2000788674	RACA	amphibian	Amphibia	Rana	catesbeiana	NA	NA	BULLFROG	LIV	5000	NO	850	EC	EC	T	C	C	C	2000-08-29	2000	2000-07-30	2000	I	NW	KIN YICK TRADING CORPORATION	VIVACOCE CIA LTDA	Original value in 'species' column: catesbeinana	Rana catesbeiana	Rana catesbeiana
2000788744	RACA	amphibian	Amphibia	Rana	catesbeiana	NA	NA	BULLFROG	LIV	1008	NO	294	DO	DO	T	C	C	C	2000-08-29	2000	2000-07-30	2000	I	NW	NORTH SEA TRADING CORPORATION	HECTOR ANT. TORO	Original value in 'species' column: catesbeinana	Rana catesbeiana	Rana catesbeiana
2000794946	ANCT	amphibian	Amphibia	NA	NA	NA	NON-CITES	AMPHIBIANS	SPE	102	NO	0	GT	GT	S	W	C	C	2000-08-18	2000	2000-07-30	2000	I	DF	DEPARTMENT OF BIOLOGY VTA	SMITH ERIC N	NA	Na na	NA
2000803544	CYOR	amphibian	Amphibia	Cynops	orientalis	NA	CHINESE DWARF	NEWT	LIV	1050	NO	84	HK	HK	T	W	C	C	2000-07-30	2000	2000-07-30	2000	I	LA	DOLPHIN INTERNATIONAL	SANWOO FISHERIES	NA	Cynops orientalis	Cynops orientalis
2000803544	HYMC	amphibian	Amphibia	Hymenochirus	curtipes	NA	W. DWARF CLAWED	FROG	LIV	10640	NO	1277	HK	HK	T	W	C	C	2000-07-30	2000	2000-07-30	2000	I	LA	DOLPHIN INTERNATIONAL	SANWOO FISHERIES	NA	Hymenochirus curtipes	Hymenochirus curtipes
2000803544	TYVE	amphibian	Amphibia	Tylototriton	verrucosus	NA	CROCODILE	NEWT	LIV	120	NO	162	HK	HK	T	W	C	C	2000-07-30	2000	2000-07-30	2000	I	LA	DOLPHIN INTERNATIONAL	SANWOO FISHERIES	NA	Tylototriton verrucosus	Tylototriton verrucosus
2000806498	BOOR	amphibian	Amphibia	Bombina	orientalis	NA	ORIENTAL FIREBELLY	TOAD	LIV	2600	NO	866	CN	CN	T	W	C	C	2000-07-30	2000	2000-07-30	2000	I	LA	DOLPHIN INTERNATIONAL	SHANGHAI GOLDEN FIELD GARDENING COMPANY, LTD	NA	Bombina orientalis	Bombina orientalis
2000806498	CYPY	amphibian	Amphibia	Cynops	pyrrhogaster	NA	JAPANESE FIREBELLY	NEWT	LIV	6600	NO	667	CN	CN	T	W	C	C	2000-07-30	2000	2000-07-30	2000	I	LA	DOLPHIN INTERNATIONAL	SHANGHAI GOLDEN FIELD GARDENING COMPANY, LTD	NA	Cynops pyrrhogaster	Cynops pyrrhogaster
2000806812	ANCT	amphibian	Amphibia	NA	NA	NA	NON-CITES	AMPHIBIANS	LIV	240	NO	101	HK	HK	T	W	C	C	2000-07-30	2000	2000-07-30	2000	I	LA	DOLPHIN INTERNATIONAL	UNION TROPICAL FISH FARM LTD	NA	Na na	NA
2000806812	CYOR	amphibian	Amphibia	Cynops	orientalis	NA	CHINESE DWARF	NEWT	LIV	950	NO	155	HK	HK	T	W	C	C	2000-07-30	2000	2000-07-30	2000	I	LA	DOLPHIN INTERNATIONAL	UNION TROPICAL FISH FARM LTD	NA	Cynops orientalis	Cynops orientalis
2000816678	BOOR	amphibian	Amphibia	Bombina	orientalis	NA	ORIENTAL FIREBELLY	TOAD	LIV	120	NO	108	HK	HK	T	W	C	C	2000-07-31	2000	2000-07-30	2000	I	NY	ERDA INC.	BROTHER AQUARIUM	NA	Bombina orientalis	Bombina orientalis
2000816678	HYMC	amphibian	Amphibia	Hymenochirus	curtipes	NA	W. DWARF CLAWED	FROG	LIV	200	NO	44	HK	HK	T	W	C	C	2000-07-31	2000	2000-07-30	2000	I	NY	ERDA INC.	BROTHER AQUARIUM	NA	Hymenochirus curtipes	Hymenochirus curtipes
2000768916	RMAC	amphibian	Amphibia	Rana	macrodon	NA	NA	BULLFROG	SHO	4	NO	40	ID	IT	T	W	C	C	2000-08-01	2000	2000-07-31	2000	I	NY	NICO ALBANESE INC.	MAXIMA SNC	NA	Rana macrodon	NA
2000771819	HYSE	amphibian	Amphibia	Hyla	septentrionalis	NA	CUBAN TREE	FROG	SHE	6912	NO	145	CN	TW	T	W	C	C	2000-08-02	2000	2000-07-31	2000	I	LA	FEDERATED PRODUCT DEVELOPMENT	DELTA KNITTING COMPANY LTD.	NA	Hyla septentrionalis	NA
2000788808	RACA	amphibian	Amphibia	Rana	catesbeiana	NA	NA	BULLFROG	LIV	40000	NO	47270	TW	TW	T	W	C	C	2000-07-31	2000	2000-07-31	2000	I	SF	NOR-CAL SEAFOOD INC.	PENSETO SEAFOODS COMPANY, LTD	Original value in 'species' column: catesbeinana	Rana catesbeiana	Rana catesbeiana
2000789306	RACA	amphibian	Amphibia	Rana	catesbeiana	NA	NA	BULLFROG	LIV	626	KG	370	DO	DO	T	C	C	C	2000-08-11	2000	2000-07-31	2000	I	NW	TIN TIN FISH TRADING INC.	LIVE FROGS	Original value in 'species' column: catesbeinana	Rana catesbeiana	Rana catesbeiana
2000804811	RACA	amphibian	Amphibia	Rana	catesbeiana	NA	NA	BULLFROG	LIV	8000	NO	1000	BR	BR	T	W	C	C	2000-08-01	2000	2000-07-31	2000	I	NY	KIN YICK TRADING CORPORATION	RANAJAX IMP + EXP	Original value in 'species' column: catesbeinana	Rana catesbeiana	Rana catesbeiana
2000824739	RABE	amphibian	Amphibia	Rana	berlandieri	NA	RIO GRANDE	FROG	LIV	350	KG	2198	MX	MX	T	W	C	C	2000-07-31	2000	2000-07-31	2000	I	BV	RANA LABORATORIES	ALVARO GARZA MONTALVO	NA	Rana berlandieri	Rana berlandieri
2000772824	AGCL	amphibian	Amphibia	Agalychnis	callidryas	NA	RED-EYED TREE	FROG	LIV	100	NO	175	NI	NI	T	W	C	C	2000-08-01	2000	2000-08-01	2000	I	LA	L. A. REPTILE	EXPASA COMPANY	NA	Agalychnis callidryas	Agalychnis callidryas
2000772824	DEAU	amphibian	Amphibia	Dendrobates	auratus	NA	GREEN	POISON-ARROW FROG	LIV	78	NO	156	NI	NI	T	W	C	C	2000-08-01	2000	2000-08-01	2000	I	LA	L. A. REPTILE	EXPASA COMPANY	NA	Dendrobates auratus	Dendrobates auratus
2000772824	DPUM	amphibian	Amphibia	Dendrobates	pumilio	NA	STRAWBERRY	POISON-ARROW FROG	LIV	125	NO	250	NI	NI	T	W	C	C	2000-08-01	2000	2000-08-01	2000	I	LA	L. A. REPTILE	EXPASA COMPANY	NA	Dendrobates pumilio	Oophaga pumilio
2000789408	RACA	amphibian	Amphibia	Rana	catesbeiana	NA	NA	BULLFROG	LIV	756	NO	220	DO	DO	T	C	C	C	2000-08-11	2000	2000-08-01	2000	I	NW	NORTH SEA TRADING CORPORATION	HECTOR ANT TORO	Original value in 'species' column: catesbeinana	Rana catesbeiana	Rana catesbeiana
2000910988	CHIX	amphibian	Amphibia	Chiromantis	xerapelina	NA	AFRICAN GRAY TREE	FROG	LIV	100	NO	125	TZ	TZ	T	W	C	C	2000-08-01	2000	2000-08-01	2000	I	MI	SALMERON, JOSE	KIRYA GENERAL SUPPLIES	NA	Chiromantis xerapelina	NA
2000774845	BOOR	amphibian	Amphibia	Bombina	orientalis	NA	ORIENTAL FIREBELLY	TOAD	LIV	6000	NO	900	CN	CN	T	W	C	C	2000-08-02	2000	2000-08-02	2000	I	LA	R. H. PET INCORPORATED	SAB FUQI IMPORT & EXPORT CO LTD	NA	Bombina orientalis	Bombina orientalis
2000789228	RACA	amphibian	Amphibia	Rana	catesbeiana	NA	NA	BULLFROG	LIV	5000	NO	413	DO	DO	T	C	C	C	2000-08-29	2000	2000-08-02	2000	I	NW	TIN TIN FISH TRADING INC.	LIVE FROGS	Original value in 'species' column: catesbeinana	Rana catesbeiana	Rana catesbeiana
2000790260	KALO	amphibian	Amphibia	Kaloula	pulchra	NA	ASIATIC PAINTED	FROG	LIV	100	NO	30	VN	VN	T	U	C	C	2000-08-03	2000	2000-08-02	2000	I	MI	JP PETS	NA	NA	Kaloula pulchra	Kaloula pulchra
2000790260	RLEU	amphibian	Amphibia	Rhacophorus	leucomystax	NA	FLYING	FROG	LIV	150	NO	45	VN	VN	T	U	C	C	2000-08-03	2000	2000-08-02	2000	I	MI	JP PETS	NA	NA	Rhacophorus leucomystax	NA
2000812141	HEMM	amphibian	Amphibia	Hemisus	marmoratus	NA	MARBLED SHOVELNOSE	FROG	LIV	300	NO	150	TZ	TZ	T	W	C	C	2000-08-02	2000	2000-08-02	2000	I	LA	L. A. REPTILE	KISASE INVESTMENT	NA	Hemisus marmoratus	Hemisus marmoratus
2000815835	BOOR	amphibian	Amphibia	Bombina	orientalis	NA	ORIENTAL FIREBELLY	TOAD	LIV	200	NO	20	CN	CN	T	W	C	C	2000-08-04	2000	2000-08-02	2000	I	NY	MIN HUA ENTERPRISE, INC.	SHANGHAI ESWELL ENTERPRISE CO LTD	NA	Bombina orientalis	Bombina orientalis
2000815835	CYOR	amphibian	Amphibia	Cynops	orientalis	NA	CHINESE DWARF	NEWT	LIV	100	NO	5	CN	CN	T	W	C	C	2000-08-04	2000	2000-08-02	2000	I	NY	MIN HUA ENTERPRISE, INC.	SHANGHAI ESWELL ENTERPRISE CO LTD	NA	Cynops orientalis	Cynops orientalis
2000904405	BUME	amphibian	Amphibia	Bufo	melanostictus	NA	BLACK-SPINED	TOAD	LIV	50	NO	50	ID	ID	T	W	C	C	2000-08-03	2000	2000-08-02	2000	I	MI	MIAMI REPTILE	PT MEGA CITRINDO	NA	Bufo melanostictus	Duttaphrynus melanostictus
2000904405	LICA	amphibian	Amphibia	Litoria	caerulea	NA	WHITE'S TREE	FROG	LIV	267	NO	440	ID	ID	T	W	C	C	2000-08-03	2000	2000-08-02	2000	I	MI	MIAMI REPTILE	PT MEGA CITRINDO	NA	Litoria caerulea	Litoria caerulea
2000904405	MENA	amphibian	Amphibia	Megophrys	nasuta	NA	SPADEFOOT	TOAD	LIV	40	NO	160	ID	ID	T	W	C	C	2000-08-03	2000	2000-08-02	2000	I	MI	MIAMI REPTILE	PT MEGA CITRINDO	NA	Megophrys nasuta	Pelobatrachus nasuta
2000904405	RMAC	amphibian	Amphibia	Rana	macrodon	NA	NA	BULLFROG	LIV	81	NO	162	ID	ID	T	W	C	C	2000-08-03	2000	2000-08-02	2000	I	MI	MIAMI REPTILE	PT MEGA CITRINDO	NA	Rana macrodon	NA
2000771795	RACA	amphibian	Amphibia	Rana	catesbeiana	NA	NA	BULLFROG	MEA	13064	KG	74000	TW	TW	T	W	C	C	2000-08-12	2000	2000-08-03	2000	I	LA	SEA PORT PRODUCTS CORP.	MARNEX COMPANY	Original value in 'species' column: catesbeinana	Rana catesbeiana	Rana catesbeiana
2000772006	MENA	amphibian	Amphibia	Megophrys	nasuta	NA	SPADEFOOT	TOAD	LIV	3	NO	75	MY	MY	T	W	C	C	2000-08-03	2000	2000-08-03	2000	I	LA	CLEVELAND METROPARKS ZOO	TROPICAL ENTOMOLOGICAL HOUSE	NA	Megophrys nasuta	Pelobatrachus nasuta
2000774913	LICA	amphibian	Amphibia	Litoria	caerulea	NA	WHITE'S TREE	FROG	LIV	175	NO	452	ID	ID	T	W	C	C	2000-08-03	2000	2000-08-03	2000	I	LA	TEPEDELEN, KAMURAN	CV TERRARIA INDONESIA	NA	Litoria caerulea	Litoria caerulea
2000785433	RACA	amphibian	Amphibia	Rana	catesbeiana	NA	NA	BULLFROG	LIV	1470	NO	1029	CN	CN	T	W	C	C	2000-08-03	2000	2000-08-03	2000	I	NY	KIN YICK TRADING CORPORATION	ESTATE GALLEN INTERNATIONAL	Original value in 'species' column: catesbeinana	Rana catesbeiana	Rana catesbeiana
2000788260	RACA	amphibian	Amphibia	Rana	catesbeiana	NA	NA	BULLFROG	MEA	19228	KG	108201	TW	TW	T	W	C	C	2000-08-07	2000	2000-08-03	2000	I	NW	INTEROCEAN INC.	PIONEERING TECH INTERNATIONAL CO LIMITED	Original value in 'species' column: catesbeinana	Rana catesbeiana	Rana catesbeiana
2000794608	RAFO	amphibian	Amphibia	Rana	forreri	NA	FORRER'S GRASS	FROG	SPE	5165	NO	1800	MX	MX	T	W	C	C	2000-08-04	2000	2000-08-03	2000	I	NG	RANACO CORPORATION	P.A.M.E.E.S.A.	NA	Rana forreri	Rana forreri
2000811505	HYMB	amphibian	Amphibia	Hymenochirus	boettgeri	NA	ZAIRE DWARF CLAWED	FROG	LIV	2000	NO	220	HK	HK	T	U	C	C	2000-08-30	2000	2000-08-03	2000	I	TP	5-D TROPICAL, INC.	WUN FAT AQUARIUM	NA	Hymenochirus boettgeri	Hymenochirus boettgeri
2000814342	RACA	amphibian	Amphibia	Rana	catesbeiana	NA	NA	BULLFROG	LIV	15	NO	30	MX	MX	T	W	C	C	2000-08-03	2000	2000-08-03	2000	I	MP	BIO CORPORATION	ARTURO BELTRON	Original value in 'species' column: catesbeinana	Rana catesbeiana	Rana catesbeiana
2000814342	RAPI	amphibian	Amphibia	Rana	pipiens	NA	NORTHERN LEOPARD	FROG	LIV	3118	NO	2000	MX	MX	T	W	C	C	2000-08-03	2000	2000-08-03	2000	I	MP	BIO CORPORATION	ARTURO BELTRON	NA	Rana pipiens	Rana pipiens
2000789233	RACA	amphibian	Amphibia	Rana	catesbeiana	NA	NA	BULLFROG	LIV	5000	NO	403	DO	DO	T	C	C	C	2000-08-29	2000	2000-08-04	2000	I	NW	TIN TIN FISH TRADING INC.	LIVE FROGS	Original value in 'species' column: catesbeinana	Rana catesbeiana	Rana catesbeiana
2000824318	RACA	amphibian	Amphibia	Rana	catesbeiana	NA	NA	BULLFROG	LIV	1200	NO	350	DO	DO	T	C	C	C	2000-11-06	2000	2000-08-04	2000	I	NW	NORTH SEA TRADING CORPORATION	HECTOR ANT. TORO	Original value in 'species' column: catesbeinana	Rana catesbeiana	Rana catesbeiana
2000824741	RACA	amphibian	Amphibia	Rana	catesbeiana	NA	NA	BULLFROG	DEA	1212	KG	8939	MX	MX	T	W	C	C	2000-08-04	2000	2000-08-04	2000	I	BV	AQUA FOODS INTERNATIONAL, INC.	ZOOLOGICA PARA INVESTIGACI	Original value in 'species' column: catesbeinana	Rana catesbeiana	Rana catesbeiana
2000824741	RAPI	amphibian	Amphibia	Rana	pipiens	NA	NORTHERN LEOPARD	FROG	DEA	1460	KG	4966	MX	MX	T	W	C	C	2000-08-04	2000	2000-08-04	2000	I	BV	AQUA FOODS INTERNATIONAL, INC.	ZOOLOGICA PARA INVESTIGACI	NA	Rana pipiens	Rana pipiens
2000830491	DTRV	amphibian	Amphibia	Epipedobates	trivittatus	NA	THREE-STRIPED	POISON-ARROW FROG	LIV	15	NO	187	SR	SR	T	W	C	C	2000-08-06	2000	2000-08-04	2000	I	MI	L. A. REPTILE	TROPICAL BIRDS & REPTILES	NA	Epipedobates trivittatus	Ameerega trivittata
2000774039	CYPY	amphibian	Amphibia	Cynops	pyrrhogaster	NA	JAPANESE FIREBELLY	NEWT	LIV	100	NO	42	HK	HK	T	R	C	C	2000-08-05	2000	2000-08-05	2000	I	LA	DOLPHIN INTERNATIONAL	UNION TROPICAL FISH FARM LIMITED	NA	Cynops pyrrhogaster	Cynops pyrrhogaster
2000797958	XELA	amphibian	Amphibia	Xenopus	laevis	NA	AFRICAN CLAWED	TOAD	LIV	4580	NO	795	HK	HK	T	W	C	C	2000-08-08	2000	2000-08-05	2000	I	NY	TRANSSHIP DISCOUNTS LTD.	UNION TROPICAL FISH FARM	NA	Xenopus laevis	Xenopus laevis
2000802064	LICA	amphibian	Amphibia	Litoria	caerulea	NA	WHITE'S TREE	FROG	LIV	1476	NO	1986	ID	ID	T	W	C	C	2000-08-05	2000	2000-08-05	2000	I	LA	AQUA-NAUTIC SPECIALIST	P.T. BEKAEL ESKA GEMLANG	NA	Litoria caerulea	Litoria caerulea
2000804102	CYPY	amphibian	Amphibia	Cynops	pyrrhogaster	NA	JAPANESE FIREBELLY	NEWT	LIV	700	NO	245	HK	HK	T	W	C	C	2000-08-07	2000	2000-08-05	2000	I	NY	ERDA INC.	BROTHER AQUARIUM	NA	Cynops pyrrhogaster	Cynops pyrrhogaster
2000804102	HYMC	amphibian	Amphibia	Hymenochirus	curtipes	NA	W. DWARF CLAWED	FROG	LIV	650	NO	138	HK	HK	T	W	C	C	2000-08-07	2000	2000-08-05	2000	I	NY	ERDA INC.	BROTHER AQUARIUM	NA	Hymenochirus curtipes	Hymenochirus curtipes
2000829482	HEMM	amphibian	Amphibia	Hemisus	marmoratus	NA	MARBLED SHOVELNOSE	FROG	LIV	50	NO	25	TZ	TZ	T	W	C	C	2000-08-05	2000	2000-08-05	2000	I	MI	INTERNATIONAL FISHERIES INC	STERLIG NURSERY & FISH WORLD	NA	Hemisus marmoratus	Hemisus marmoratus
2000830503	DETI	amphibian	Amphibia	Dendrobates	tinctorius	NA	DYEING	POISON-ARROW FROG	LIV	20	NO	700	SR	SR	T	W	C	C	2000-08-06	2000	2000-08-05	2000	I	MI	INTERNATIONAL DRAGON BREEDERS INC	NA	NA	Dendrobates tinctorius	Dendrobates tinctorius
2000830503	DTRV	amphibian	Amphibia	Epipedobates	trivittatus	NA	THREE-STRIPED	POISON-ARROW FROG	LIV	10	NO	450	SR	SR	T	W	C	C	2000-08-06	2000	2000-08-05	2000	I	MI	INTERNATIONAL DRAGON BREEDERS INC	NA	NA	Epipedobates trivittatus	Ameerega trivittata
2000830503	PHBC	amphibian	Amphibia	Phyllomedusa	bicolor	NA	GIANT MONKEY	FROG	LIV	45	NO	1235	SR	SR	T	W	C	C	2000-08-06	2000	2000-08-05	2000	I	MI	INTERNATIONAL DRAGON BREEDERS INC	NA	NA	Phyllomedusa bicolor	Phyllomedusa bicolor
2000773037	HYMC	amphibian	Amphibia	Hymenochirus	curtipes	NA	W. DWARF CLAWED	FROG	LIV	1600	NO	760	SG	SG	T	W	C	C	2000-08-06	2000	2000-08-06	2000	I	LA	AQUA-NAUTIC SPECIALIST	AQUANAUTICS SPECIALIST PTE LTD	NA	Hymenochirus curtipes	Hymenochirus curtipes
2000774017	HYMC	amphibian	Amphibia	Hymenochirus	curtipes	NA	W. DWARF CLAWED	FROG	LIV	1200	NO	72	ID	ID	T	W	C	C	2000-08-06	2000	2000-08-06	2000	I	LA	DOLPHIN INTERNATIONAL	VIVARIA INDONESIA P.T.	NA	Hymenochirus curtipes	Hymenochirus curtipes
2000774017	OOLI	amphibian	Amphibia	Occidozyga	lima	NA	PADDY	FROG	LIV	600	NO	30	ID	ID	T	W	C	C	2000-08-06	2000	2000-08-06	2000	I	LA	DOLPHIN INTERNATIONAL	VIVARIA INDONESIA P.T.	Original value in 'genus' column: ooedozyga	Occidozyga lima	Occidozyga lima
2000774029	CYOR	amphibian	Amphibia	Cynops	orientalis	NA	CHINESE DWARF	NEWT	LIV	450	NO	126	HK	HK	T	W	C	C	2000-08-06	2000	2000-08-06	2000	I	LA	DOLPHIN INTERNATIONAL	SANWOO FISHERIES	NA	Cynops orientalis	Cynops orientalis
2000774029	HYMC	amphibian	Amphibia	Hymenochirus	curtipes	NA	W. DWARF CLAWED	FROG	LIV	4200	NO	504	HK	HK	T	W	C	C	2000-08-06	2000	2000-08-06	2000	I	LA	DOLPHIN INTERNATIONAL	SANWOO FISHERIES	NA	Hymenochirus curtipes	Hymenochirus curtipes
2000774034	BOOR	amphibian	Amphibia	Bombina	orientalis	NA	ORIENTAL FIREBELLY	TOAD	LIV	2500	NO	802	CN	CN	T	W	C	C	2000-08-06	2000	2000-08-06	2000	I	LA	DOLPHIN INTERNATIONAL	SHANGHAI GOLDEN FIELD GARDENING CO LIMITED	NA	Bombina orientalis	Bombina orientalis
2000774034	CYPY	amphibian	Amphibia	Cynops	pyrrhogaster	NA	JAPANESE FIREBELLY	NEWT	LIV	7500	NO	727	CN	CN	T	W	C	C	2000-08-06	2000	2000-08-06	2000	I	LA	DOLPHIN INTERNATIONAL	SHANGHAI GOLDEN FIELD GARDENING CO LIMITED	NA	Cynops pyrrhogaster	Cynops pyrrhogaster
2000785101	OOLI	amphibian	Amphibia	Occidozyga	lima	NA	PADDY	FROG	LIV	150	NO	13	ID	ID	T	W	C	C	2000-08-08	2000	2000-08-06	2000	I	NY	TRANSSHIP DISCOUNTS LTD.	VIVAJAYA INTERNATIONAL	Original value in 'genus' column: ooedozyga	Occidozyga lima	Occidozyga lima
2000789230	RACA	amphibian	Amphibia	Rana	catesbeiana	NA	NA	BULLFROG	LIV	5000	NO	370	DO	DO	T	C	C	C	2000-08-29	2000	2000-08-06	2000	I	NW	TIN TIN FISH TRADING INC.	LIVE FROGS	Original value in 'species' column: catesbeinana	Rana catesbeiana	Rana catesbeiana
2000805230	HYMC	amphibian	Amphibia	Hymenochirus	curtipes	NA	W. DWARF CLAWED	FROG	LIV	150	NO	60	SG	SG	T	W	C	C	2000-08-06	2000	2000-08-06	2000	I	LA	AQUACO, INC.	SUNRISE AQUARIUM PTE, LTD	NA	Hymenochirus curtipes	Hymenochirus curtipes
2000806618	HYMC	amphibian	Amphibia	Hymenochirus	curtipes	NA	W. DWARF CLAWED	FROG	LIV	1600	NO	352	HK	HK	T	C	C	C	2000-08-06	2000	2000-08-06	2000	I	LA	AQUACO, INC.	DRAGON FISHERIES	NA	Hymenochirus curtipes	Hymenochirus curtipes
2000811726	HYMB	amphibian	Amphibia	Hymenochirus	boettgeri	NA	ZAIRE DWARF CLAWED	FROG	LIV	250	NO	50	HK	HK	T	W	C	C	2000-08-06	2000	2000-08-06	2000	I	LA	TROPICAL ENTERPRISES	CEYLON AQUARIUM	NA	Hymenochirus boettgeri	Hymenochirus boettgeri
2000815921	ANCT	amphibian	Amphibia	NA	NA	NA	NON-CITES	AMPHIBIANS	LIV	95	NO	143	TG	TG	T	W	C	C	2000-08-07	2000	2000-08-07	2000	I	LA	L. A. REPTILE INC.	PAJAR S.A.R.L. IMPORT EXP. TOGO	NA	Na na	NA
2000824737	RABE	amphibian	Amphibia	Rana	berlandieri	NA	RIO GRANDE	FROG	LIV	250	KG	1570	MX	MX	T	W	C	C	2000-08-07	2000	2000-08-07	2000	I	BV	RANA LABORATORIES	ALVARO GARZA MONTALVO	NA	Rana berlandieri	Rana berlandieri
2000772013	RACA	amphibian	Amphibia	Rana	catesbeiana	NA	NA	BULLFROG	MEA	8165	NO	47375	TW	TW	T	C	C	C	2000-08-04	2000	2000-08-08	2000	I	LA	SEA PORT PRODUCTS CORP.	MARNEX COMPANY	Original value in 'species' column: catesbeinana	Rana catesbeiana	Rana catesbeiana
2000783828	HYMB	amphibian	Amphibia	Hymenochirus	boettgeri	NA	ZAIRE DWARF CLAWED	FROG	LIV	2400	NO	72	HK	HK	T	C	C	C	2000-08-08	2000	2000-08-08	2000	I	AT	FINN'S AQUATICS INC.	FORTUNE WIDE ASIA	NA	Hymenochirus boettgeri	Hymenochirus boettgeri
2000793559	RACA	amphibian	Amphibia	Rana	catesbeiana	NA	NA	BULLFROG	LIV	483	KG	336	DO	DO	T	C	C	C	2000-08-08	2000	2000-08-08	2000	I	NW	TIN TIN FISH TRADING INC.	LIVE FROGSS DONINGANA PRESADHATILLOCOTUI	Original value in 'species' column: catesbeinana	Rana catesbeiana	Rana catesbeiana
2000809393	RACA	amphibian	Amphibia	Rana	catesbeiana	NA	NA	BULLFROG	LIV	1128	NO	329	DO	DO	T	W	C	C	2000-08-11	2000	2000-08-08	2000	I	NW	NORTH SEA TRADING CORPORATION	HECTOR TORO	Original value in 'species' column: catesbeinana	Rana catesbeiana	Rana catesbeiana
2000813827	RACA	amphibian	Amphibia	Rana	catesbeiana	NA	NA	BULLFROG	LIV	8000	NO	1000	BR	BR	T	W	C	C	2000-08-09	2000	2000-08-08	2000	I	NY	KIN YICK TRADING CORPORATION	RANAJAX IMPORT & EXPORT	Original value in 'species' column: catesbeinana	Rana catesbeiana	Rana catesbeiana
2000778422	ANCT	amphibian	Amphibia	NA	NA	NA	NON-CITES	AMPHIBIANS	LIV	300	NO	0	CN	CN	T	W	C	C	2000-08-16	2000	2000-08-09	2000	I	NY	MIN HUA ENTERPRISE, INC.	SHANGHAI ESWELL ENTERPRISE CO LIMITED	NA	Na na	NA
2000788256	XELA	amphibian	Amphibia	Xenopus	laevis	NA	AFRICAN CLAWED	TOAD	LIV	525	NO	53	NG	NG	T	W	C	C	2000-08-10	2000	2000-08-09	2000	I	NW	GLOBAL TROPICAL RESOURCES INC.	SPIVAP NIGERIA LIMITED	NA	Xenopus laevis	Xenopus laevis
2000794606	RACA	amphibian	Amphibia	Rana	catesbeiana	NA	NA	BULLFROG	SPE	108	NO	72	MX	MX	T	W	C	C	2000-08-09	2000	2000-08-09	2000	I	NG	RANACO CORPORATION	P.A.M.E.E.S.A.	Original value in 'species' column: catesbeinana	Rana catesbeiana	Rana catesbeiana
2000794606	RAFO	amphibian	Amphibia	Rana	forreri	NA	FORRER'S GRASS	FROG	SPE	10555	NO	4410	MX	MX	T	W	C	C	2000-08-09	2000	2000-08-09	2000	I	NG	RANACO CORPORATION	P.A.M.E.E.S.A.	NA	Rana forreri	Rana forreri
2000799813	PHBC	amphibian	Amphibia	Phyllomedusa	bicolor	NA	GIANT MONKEY	FROG	LIV	10	NO	7	GY	GY	T	W	C	C	2000-08-09	2000	2000-08-09	2000	I	MI	ZOOLOGICAL IMPORTS ZOO INC.	VAN SERTIMA BIOLOGICAL PRODUCTS	NA	Phyllomedusa bicolor	Phyllomedusa bicolor
2000814511	RACA	amphibian	Amphibia	Rana	catesbeiana	NA	NA	BULLFROG	LIV	2520	NO	864	TW	TW	T	W	C	C	2000-08-30	2000	2000-08-09	2000	I	NY	KIN YICK TRADING CORPORATION	ESTATE GALLERY INTERNATIONAL	Original value in 'species' column: catesbeinana	Rana catesbeiana	Rana catesbeiana
2000817449	PHBC	amphibian	Amphibia	Phyllomedusa	bicolor	NA	GIANT MONKEY	FROG	LIV	10	NO	7	GY	GY	T	W	C	C	2000-08-09	2000	2000-08-09	2000	I	MI	ZOOLOGICAL IMPORTS 2000 INC.	VAN SERTIMAS BIO PRODUCTS	NA	Phyllomedusa bicolor	Phyllomedusa bicolor
2000773941	MAAU	amphibian	Amphibia	Mantella	aurantiaca	NA	MALAGASY GOLDEN	MANTELLA	LIV	300	NO	1800	MG	MG	T	W	C	C	2000-08-10	2000	2000-08-10	2000	I	LA	CALIFORNIA ZOOLOGICAL SUPPLY	SOPRACO	NA	Mantella aurantiaca	Mantella aurantiaca
2000784759	XELA	amphibian	Amphibia	Xenopus	laevis	NA	AFRICAN CLAWED	TOAD	LIV	500	NO	500	ZA	ZA	T	W	C	C	2000-08-10	2000	2000-08-10	2000	I	AT	XENOPUS EXPRESS	NA	NA	Xenopus laevis	Xenopus laevis
2000794192	RACA	amphibian	Amphibia	Rana	catesbeiana	NA	NA	BULLFROG	LIV	5000	NO	320	DO	DO	T	C	C	C	2000-08-10	2000	2000-08-10	2000	I	NW	TIN TIN FISH TRADING INC.	LIVE FROGS DOMINICANA	Original value in 'species' column: catesbeinana	Rana catesbeiana	Rana catesbeiana
2000811496	HYMB	amphibian	Amphibia	Hymenochirus	boettgeri	NA	ZAIRE DWARF CLAWED	FROG	LIV	1000	NO	110	HK	HK	T	U	C	C	2000-08-30	2000	2000-08-10	2000	I	TP	5-D TROPICAL, INC.	WUN FAT AQUARIUM	NA	Hymenochirus boettgeri	Hymenochirus boettgeri
2000814383	RACA	amphibian	Amphibia	Rana	catesbeiana	NA	NA	BULLFROG	LIV	17	NO	30	MX	MX	T	W	C	C	2000-08-10	2000	2000-08-10	2000	I	MP	BIO CORPORATION	ARTURO BELTRON	Original value in 'species' column: catesbeinana	Rana catesbeiana	Rana catesbeiana
2000814383	RAPI	amphibian	Amphibia	Rana	pipiens	NA	NORTHERN LEOPARD	FROG	LIV	2050	NO	1300	MX	MX	T	W	C	C	2000-08-10	2000	2000-08-10	2000	I	MP	BIO CORPORATION	ARTURO BELTRON	NA	Rana pipiens	Rana pipiens
2000927311	ANCT	amphibian	Amphibia	NA	NA	NA	NON-CITES	AMPHIBIANS	SPE	5	NO	0	MG	MG	S	W	C	C	2000-08-10	2000	2000-08-10	2000	I	CH	LOUIS, EDWARD	LOUIS, EDWARD	NA	Na na	NA
2000927311	MANB	amphibian	Amphibia	Mantella	betsileo	NA	BETSILEO GOLDEN	MANTELLA	SPE	5	NO	0	MG	MG	S	W	C	C	2000-08-10	2000	2000-08-10	2000	I	CH	LOUIS, EDWARD	LOUIS, EDWARD	NA	Mantella betsileo	Mantella betsileo
2000927311	MNLA	amphibian	Amphibia	Mantella	laevigata	NA	FOLOHY GOLDEN	MANTELLA	SPE	3	NO	0	MG	MG	S	W	C	C	2000-08-10	2000	2000-08-10	2000	I	CH	LOUIS, EDWARD	LOUIS, EDWARD	NA	Mantella laevigata	Mantella laevigata
2000377571	LICA	amphibian	Amphibia	Litoria	caerulea	NA	WHITE'S TREE	FROG	LIV	220	NO	330	ID	ID	T	W	C	C	2000-08-11	2000	2000-08-11	2000	I	MI	MIAMI REPTILE/QUALITY FIRST PETS	FIRMA HASCO	NA	Litoria caerulea	Litoria caerulea
2000788407	RACA	amphibian	Amphibia	Rana	catesbeiana	NA	NA	BULLFROG	LIV	3000	NO	945	TW	TW	T	W	C	C	2000-08-11	2000	2000-08-11	2000	I	NY	HOY LUNG SEAFOOD CORPORATION	HORREI FISHERY CO.	Original value in 'species' column: catesbeinana	Rana catesbeiana	Rana catesbeiana
2000805112	RMAC	amphibian	Amphibia	Rana	macrodon	NA	NA	BULLFROG	SHO	18	NO	672	ID	ID	T	W	C	C	2000-08-16	2000	2000-08-11	2000	I	LA	COSTUME NATIONAL AMERICA SHOPS, INC.	I GUARDI S.R.L.	NA	Rana macrodon	NA
2000806587	BUVI	amphibian	Amphibia	Bufo	viridis	NA	EUROPEAN GREEN	TOAD	LIV	500	NO	175	EG	EG	T	W	C	C	2000-08-11	2000	2000-08-11	2000	I	LA	L. A. REPTILE	KING OF AFRICAN REPTILES	NA	Bufo viridis	NA
2000793562	RACA	amphibian	Amphibia	Rana	catesbeiana	NA	NA	BULLFROG	LIV	465	KG	350	DO	DO	T	C	C	C	2000-08-12	2000	2000-08-12	2000	I	NW	TIN TIN FISH TRADING INC.	LIVE FROGSS DONINGANA PRESADHATILLOCOTUZ	Original value in 'species' column: catesbeinana	Rana catesbeiana	Rana catesbeiana
2000803976	CYPY	amphibian	Amphibia	Cynops	pyrrhogaster	NA	JAPANESE FIREBELLY	NEWT	LIV	200	NO	40	HK	HK	T	W	C	C	2000-08-14	2000	2000-08-12	2000	I	NY	ERDA INC.	BROTHER AQUARIUM	NA	Cynops pyrrhogaster	Cynops pyrrhogaster
2000803976	HYMC	amphibian	Amphibia	Hymenochirus	curtipes	NA	W. DWARF CLAWED	FROG	LIV	900	NO	188	HK	HK	T	W	C	C	2000-08-14	2000	2000-08-12	2000	I	NY	ERDA INC.	BROTHER AQUARIUM	NA	Hymenochirus curtipes	Hymenochirus curtipes
2000811403	CYPY	amphibian	Amphibia	Cynops	pyrrhogaster	NA	JAPANESE FIREBELLY	NEWT	LIV	100	NO	42	HK	HK	T	W	C	C	2000-08-12	2000	2000-08-12	2000	I	LA	DOLPHIN INTERNATIONAL	UNION TROPICAL FISH FARM LTD	NA	Cynops pyrrhogaster	Cynops pyrrhogaster
2000812444	LARG	amphibian	Amphibia	Leptopelis	argenteus	NA	BAGAM. FOREST TREE	FROG	LIV	23	NO	34	TZ	TZ	T	W	C	C	2000-08-12	2000	2000-08-12	2000	I	MI	GLOBAL TROPICAL IMPORT/EXPORT	AMANDLA ANIMAL FARM	NA	Leptopelis argenteus	Leptopelis argenteus
2000812444	PBIF	amphibian	Amphibia	Phrynomantis	bifasciatus	NA	S AFR SNAKE-NECK	FROG	LIV	79	NO	118	TZ	TZ	T	W	C	C	2000-08-12	2000	2000-08-12	2000	I	MI	GLOBAL TROPICAL IMPORT/EXPORT	AMANDLA ANIMAL FARM	NA	Phrynomantis bifasciatus	Phrynomantis bifasciatus
2000812451	PLWA	amphibian	Amphibia	Pleurodeles	waltl	NA	IBERIAN RIBBED	NEWT	LIV	520	NO	950	CZ	CZ	T	W	C	C	2000-08-12	2000	2000-08-12	2000	I	MI	GAMA SUPPLIERS, INC.	BAR ZOO SRO	NA	Pleurodeles waltl	Pleurodeles waltl
2000803445	RLEU	amphibian	Amphibia	Rhacophorus	leucomystax	NA	FLYING	FROG	LIV	250	NO	100	VN	VN	T	W	C	C	2000-08-13	2000	2000-08-13	2000	I	LA	UNIVERSAL AQUATIC	CORIMEX	NA	Rhacophorus leucomystax	NA
2000805420	HYMC	amphibian	Amphibia	Hymenochirus	curtipes	NA	W. DWARF CLAWED	FROG	LIV	1600	NO	640	SG	SG	T	W	C	C	2000-08-13	2000	2000-08-13	2000	I	LA	AQUA-NAUTIC SPECIALIST	AQUANAUTICS SPECALIST PTE LTD	NA	Hymenochirus curtipes	Hymenochirus curtipes
2000805486	HYMC	amphibian	Amphibia	Hymenochirus	curtipes	NA	W. DWARF CLAWED	FROG	LIV	50	NO	20	SG	SG	T	W	C	C	2000-08-13	2000	2000-08-13	2000	I	LA	AQUACO, INC.	SUNRISE AQUARIUM PTE, LTD	NA	Hymenochirus curtipes	Hymenochirus curtipes
2000806260	HYMC	amphibian	Amphibia	Hymenochirus	curtipes	NA	W. DWARF CLAWED	FROG	LIV	1200	NO	267	HK	HK	T	W	C	C	2000-08-13	2000	2000-08-13	2000	I	LA	AQUACO, INC.	DRAGON FISHERIES	NA	Hymenochirus curtipes	Hymenochirus curtipes
2000806673	LICA	amphibian	Amphibia	Litoria	caerulea	NA	WHITE'S TREE	FROG	LIV	1470	NO	2205	ID	ID	T	W	C	C	2000-08-13	2000	2000-08-13	2000	I	LA	AQUA-NAUTIC SPECIALIST	PT BEKAEL ESKA GEMILANG JL MANGGA	NA	Litoria caerulea	Litoria caerulea
2000811253	CYOR	amphibian	Amphibia	Cynops	orientalis	NA	CHINESE DWARF	NEWT	LIV	350	NO	28	HK	HK	T	W	C	C	2000-08-13	2000	2000-08-13	2000	I	LA	DOLPHIN INTERNATIONAL	SANWOO FISHERIES	NA	Cynops orientalis	Cynops orientalis
2000811253	HYMC	amphibian	Amphibia	Hymenochirus	curtipes	NA	W. DWARF CLAWED	FROG	LIV	3080	NO	370	HK	HK	T	W	C	C	2000-08-13	2000	2000-08-13	2000	I	LA	DOLPHIN INTERNATIONAL	SANWOO FISHERIES	NA	Hymenochirus curtipes	Hymenochirus curtipes
2000811253	TYVE	amphibian	Amphibia	Tylototriton	verrucosus	NA	CROCODILE	NEWT	LIV	250	NO	338	HK	HK	T	W	C	C	2000-08-13	2000	2000-08-13	2000	I	LA	DOLPHIN INTERNATIONAL	SANWOO FISHERIES	NA	Tylototriton verrucosus	Tylototriton verrucosus
2000811255	CYOR	amphibian	Amphibia	Cynops	orientalis	NA	CHINESE DWARF	NEWT	LIV	200	NO	84	HK	HK	T	W	C	C	2000-08-13	2000	2000-08-13	2000	I	LA	DOLPHIN INTERNATIONAL	UNION TROPICAL FISH FARM LTD	NA	Cynops orientalis	Cynops orientalis
2000811259	BOOR	amphibian	Amphibia	Bombina	orientalis	NA	ORIENTAL FIREBELLY	TOAD	LIV	4800	NO	1669	CN	CN	T	W	C	C	2000-08-13	2000	2000-08-13	2000	I	LA	DOLPHIN INTERNATIONAL	SHANGHAI GOLDEN FIELD GARDENING CO LTD	NA	Bombina orientalis	Bombina orientalis
2000811259	CYPY	amphibian	Amphibia	Cynops	pyrrhogaster	NA	JAPANESE FIREBELLY	NEWT	LIV	7200	NO	763	CN	CN	T	W	C	C	2000-08-13	2000	2000-08-13	2000	I	LA	DOLPHIN INTERNATIONAL	SHANGHAI GOLDEN FIELD GARDENING CO LTD	NA	Cynops pyrrhogaster	Cynops pyrrhogaster
2000811260	HYMC	amphibian	Amphibia	Hymenochirus	curtipes	NA	W. DWARF CLAWED	FROG	LIV	300	NO	18	ID	ID	T	W	C	C	2000-08-13	2000	2000-08-13	2000	I	LA	DOLPHIN INTERNATIONAL	P.T. VIVARIA INDONESIA	NA	Hymenochirus curtipes	Hymenochirus curtipes
2000811260	LICA	amphibian	Amphibia	Litoria	caerulea	NA	WHITE'S TREE	FROG	LIV	390	NO	458	ID	ID	T	W	C	C	2000-08-13	2000	2000-08-13	2000	I	LA	DOLPHIN INTERNATIONAL	P.T. VIVARIA INDONESIA	NA	Litoria caerulea	Litoria caerulea
2000811260	OOLI	amphibian	Amphibia	Occidozyga	lima	NA	PADDY	FROG	LIV	1050	NO	53	ID	ID	T	W	C	C	2000-08-13	2000	2000-08-13	2000	I	LA	DOLPHIN INTERNATIONAL	P.T. VIVARIA INDONESIA	Original value in 'genus' column: ooedozyga	Occidozyga lima	Occidozyga lima
2000811262	LICA	amphibian	Amphibia	Litoria	caerulea	NA	WHITE'S TREE	FROG	LIV	50	NO	40	ID	ID	T	W	C	C	2000-08-13	2000	2000-08-13	2000	I	LA	DOLPHIN INTERNATIONAL	VIVAJAYA INTERNATIONAL	NA	Litoria caerulea	Litoria caerulea
2000818074	BOOR	amphibian	Amphibia	Bombina	orientalis	NA	ORIENTAL FIREBELLY	TOAD	LIV	300	NO	81	CN	CN	T	W	C	C	2000-08-20	2000	2000-08-13	2000	I	NY	FISH MART INC.	SHANGHAI INTERNATIONAL TRADE & SERVICE	NA	Bombina orientalis	Bombina orientalis
2000818074	CYPY	amphibian	Amphibia	Cynops	pyrrhogaster	NA	JAPANESE FIREBELLY	NEWT	LIV	500	NO	135	CN	CN	T	W	C	C	2000-08-20	2000	2000-08-13	2000	I	NY	FISH MART INC.	SHANGHAI INTERNATIONAL TRADE & SERVICE	NA	Cynops pyrrhogaster	Cynops pyrrhogaster
2000773330	HYVI	amphibian	Amphibia	Hyperolius	viridiflavus	NA	COMMON REED	FROG	LIV	100	NO	75	TZ	TZ	T	W	C	C	2000-08-14	2000	2000-08-14	2000	I	LA	INTERNATIONAL DRAGON BREEDERS INC	GRECHANT LIMITED	NA	Hyperolius viridiflavus	Hyperolius viridiflavus
2000788183	RACA	amphibian	Amphibia	Rana	catesbeiana	NA	NA	BULLFROG	LIV	40000	NO	46921	TW	TW	T	W	C	C	2000-08-14	2000	2000-08-14	2000	I	SF	NOR-CAL SEAFOOD INC.	PENSETO SEAFOODS COMPANY, LTD	Original value in 'species' column: catesbeinana	Rana catesbeiana	Rana catesbeiana
2000794610	BMAR	amphibian	Amphibia	Bufo	marinus	NA	NEOTROPICAL	TOAD	SPE	13	NO	5	MX	MX	T	W	C	C	2000-08-14	2000	2000-08-14	2000	I	NG	RANACO CORPORATION	P.A.M.E.E.S.A.	NA	Bufo marinus	NA
2000794610	RACA	amphibian	Amphibia	Rana	catesbeiana	NA	NA	BULLFROG	SPE	4050	NO	6050	MX	MX	T	W	C	C	2000-08-14	2000	2000-08-14	2000	I	NG	RANACO CORPORATION	P.A.M.E.E.S.A.	Original value in 'species' column: catesbeinana	Rana catesbeiana	Rana catesbeiana
2000794610	RAFO	amphibian	Amphibia	Rana	forreri	NA	FORRER'S GRASS	FROG	SPE	10105	NO	3870	MX	MX	T	W	C	C	2000-08-14	2000	2000-08-14	2000	I	NG	RANACO CORPORATION	P.A.M.E.E.S.A.	NA	Rana forreri	Rana forreri
2000803402	RLEU	amphibian	Amphibia	Rhacophorus	leucomystax	NA	FLYING	FROG	LIV	32	NO	16	VN	VN	T	W	C	C	2000-08-14	2000	2000-08-14	2000	I	LA	L. A. REPTILE	CORIMEX COMPANY	NA	Rhacophorus leucomystax	NA
2000807057	KALO	amphibian	Amphibia	Kaloula	pulchra	NA	ASIATIC PAINTED	FROG	LIV	120	NO	36	VN	VN	T	W	C	C	2000-08-15	2000	2000-08-14	2000	I	LA	CALIFORNIA ZOOLOGICAL SUPPLY	VINAFOR HANOI	NA	Kaloula pulchra	Kaloula pulchra
2000812176	BRMO	amphibian	Amphibia	Breviceps	mossambiscus	NA	MZ SHORT-HEADED	FROG	LIV	150	NO	75	TZ	TZ	T	W	C	C	2000-08-14	2000	2000-08-14	2000	I	LA	CALIFORNIA ZOOLOGICAL SUPPLY	M.T. CANDIDA ENTERPRISES	NA	Breviceps mossambiscus	NA
2000812176	HEMM	amphibian	Amphibia	Hemisus	marmoratus	NA	MARBLED SHOVELNOSE	FROG	LIV	38	NO	119	TZ	TZ	T	W	C	C	2000-08-14	2000	2000-08-14	2000	I	LA	CALIFORNIA ZOOLOGICAL SUPPLY	M.T. CANDIDA ENTERPRISES	NA	Hemisus marmoratus	Hemisus marmoratus
2000862373	RAPI	amphibian	Amphibia	Rana	pipiens	NA	NORTHERN LEOPARD	FROG	LIV	3000	NO	2550	CA	CA	T	W	C	C	2000-08-14	2000	2000-08-14	2000	I	PB	LAMBERT, CLAUDE	NORMAN G JENSEN INC	NA	Rana pipiens	Rana pipiens
2000791500	XELA	amphibian	Amphibia	Xenopus	laevis	NA	AFRICAN CLAWED	TOAD	LIV	1500	NO	5100	CL	CL	T	C	C	C	2000-08-15	2000	2000-08-15	2000	I	CH	XENOPUS I, INC.	CARLOS DEL RIO CAMUS	NA	Xenopus laevis	Xenopus laevis
2000794219	RACA	amphibian	Amphibia	Rana	catesbeiana	NA	NA	BULLFROG	LIV	977	KG	880	EC	EC	T	C	C	C	2000-08-15	2000	2000-08-15	2000	I	NW	HOY LUNG SEAFOOD CORPORATION	JUAN PABLO VILLACRES	Original value in 'species' column: catesbeinana	Rana catesbeiana	Rana catesbeiana
2000794235	RACA	amphibian	Amphibia	Rana	catesbeiana	NA	NA	BULLFROG	LIV	1000	KG	1000	BR	BR	T	W	C	C	2000-08-16	2000	2000-08-15	2000	I	NY	KIN YICK TRADING CORPORATION	RAMATAX IMPORT & EXPORT	Original value in 'species' column: catesbeinana	Rana catesbeiana	Rana catesbeiana
2000965163	RACA	amphibian	Amphibia	Rana	catesbeiana	NA	NA	BULLFROG	LIV	3000	NO	4598	GT	GT	T	U	C	C	2000-08-15	2000	2000-08-15	2000	I	MI	AQUALAND, INC.	PRODUCTOS MOBOT S.A.	Original value in 'species' column: catesbeinana	Rana catesbeiana	Rana catesbeiana
2000802629	RACA	amphibian	Amphibia	Rana	catesbeiana	NA	NA	BULLFROG	LIV	3000	NO	945	TW	TW	T	C	C	C	2000-08-24	2000	2000-08-16	2000	I	NY	HOY LUNG SEAFOOD CORPORATION	HORREI FISHERY COMPANY	Original value in 'species' column: catesbeinana	Rana catesbeiana	Rana catesbeiana
2000805825	HMAD	amphibian	Amphibia	Heterixalus	madagascariensis	NA	MADAGASCAR REED	FROG	LIV	60	NO	180	MG	MG	T	W	C	C	2000-08-16	2000	2000-08-16	2000	I	LA	INTERNATIONAL DRAGON BREEDERS INC	RABARISON WILLIAM	NA	Heterixalus madagascariensis	Heterixalus madagascariensis
2000805825	MAAU	amphibian	Amphibia	Mantella	aurantiaca	NA	MALAGASY GOLDEN	MANTELLA	LIV	80	NO	320	MG	MG	T	W	C	C	2000-08-16	2000	2000-08-16	2000	I	LA	INTERNATIONAL DRAGON BREEDERS INC	RABARISON WILLIAM	NA	Mantella aurantiaca	Mantella aurantiaca
2000805825	MANB	amphibian	Amphibia	Mantella	betsileo	NA	BETSILEO GOLDEN	MANTELLA	LIV	50	NO	200	MG	MG	T	W	C	C	2000-08-16	2000	2000-08-16	2000	I	LA	INTERNATIONAL DRAGON BREEDERS INC	RABARISON WILLIAM	NA	Mantella betsileo	Mantella betsileo
2000805825	MANV	amphibian	Amphibia	Mantella	viridis	NA	GREEN GOLDEN	MANTELLA	LIV	50	NO	200	MG	MG	T	W	C	C	2000-08-16	2000	2000-08-16	2000	I	LA	INTERNATIONAL DRAGON BREEDERS INC	RABARISON WILLIAM	NA	Mantella viridis	Mantella viridis
2000805825	MCRO	amphibian	Amphibia	Mantella	crocea	NA	EASTERN GOLDEN	MANTELLA	LIV	50	NO	200	MG	MG	T	W	C	C	2000-08-16	2000	2000-08-16	2000	I	LA	INTERNATIONAL DRAGON BREEDERS INC	RABARISON WILLIAM	NA	Mantella crocea	Mantella crocea
2000805825	SCMR	amphibian	Amphibia	Scaphiophryne	marmorata	NA	MARBLED RAIN	FROG	LIV	60	NO	300	MG	MG	T	W	C	C	2000-08-16	2000	2000-08-16	2000	I	LA	INTERNATIONAL DRAGON BREEDERS INC	RABARISON WILLIAM	NA	Scaphiophryne marmorata	Scaphiophryne marmorata
2000811480	BUME	amphibian	Amphibia	Bufo	melanostictus	NA	BLACK-SPINED	TOAD	LIV	36	NO	16	TH	TH	T	W	C	C	2000-08-16	2000	2000-08-16	2000	I	LA	PET SIAM INTERNATIONAL	ASIA WORLD WIDE I/E LTD	NA	Bufo melanostictus	Duttaphrynus melanostictus
2000811480	KALO	amphibian	Amphibia	Kaloula	pulchra	NA	ASIATIC PAINTED	FROG	LIV	1150	NO	589	TH	TH	T	W	C	C	2000-08-16	2000	2000-08-16	2000	I	LA	PET SIAM INTERNATIONAL	ASIA WORLD WIDE I/E LTD	NA	Kaloula pulchra	Kaloula pulchra
2000811480	RLEU	amphibian	Amphibia	Rhacophorus	leucomystax	NA	FLYING	FROG	LIV	225	NO	203	TH	TH	T	W	C	C	2000-08-16	2000	2000-08-16	2000	I	LA	PET SIAM INTERNATIONAL	ASIA WORLD WIDE I/E LTD	NA	Rhacophorus leucomystax	NA
2000812785	RACA	amphibian	Amphibia	Rana	catesbeiana	NA	NA	BULLFROG	LIV	160	NO	240	MX	MX	T	W	C	C	2000-08-16	2000	2000-08-16	2000	I	MP	BIO CORP.	NA	Original value in 'species' column: catesbeinana	Rana catesbeiana	Rana catesbeiana
2000812785	RAPI	amphibian	Amphibia	Rana	pipiens	NA	NORTHERN LEOPARD	FROG	LIV	3445	NO	1865	MX	MX	T	W	C	C	2000-08-16	2000	2000-08-16	2000	I	MP	BIO CORP.	NA	NA	Rana pipiens	Rana pipiens
2000817770	RACA	amphibian	Amphibia	Rana	catesbeiana	NA	NA	BULLFROG	LIV	1470	KG	1029	TW	TW	T	W	C	C	2000-08-18	2000	2000-08-16	2000	I	NY	KIN YICK TRADING CORPORATION	ESTATE GALLEN INTERNATIONAL TRADE CO. LTD.	Original value in 'species' column: catesbeinana	Rana catesbeiana	Rana catesbeiana
2000789099	RACA	amphibian	Amphibia	Rana	catesbeiana	NA	NA	BULLFROG	LIV	279	KG	190	EC	EC	T	W	C	C	2000-08-23	2000	2000-08-17	2000	I	NW	TIN TIN FISH TRADING INC.	RODRIGUEZ, CARLOS	Original value in 'species' column: catesbeinana	Rana catesbeiana	Rana catesbeiana
2000789446	RATI	amphibian	Amphibia	Hoplobatrachus	tigerinus	NA	INDIAN	BULLFROG	LEG	8451	NO	29510	VN	VN	T	C	C	C	2000-08-17	2000	2000-08-17	2000	I	NW	PHOENIX TRADING CORP.	SPECIAL AQUATIC PRODUCT IMP EXP	NA	Hoplobatrachus tigerinus	Hoplobatrachus tigerinus
2000789466	RACA	amphibian	Amphibia	Rana	catesbeiana	NA	NA	BULLFROG	LIV	523	KG	364	DO	DO	T	C	C	C	2000-08-18	2000	2000-08-17	2000	I	NW	TIN TIN FISH TRADING INC.	LIVE FROGS	Original value in 'species' column: catesbeinana	Rana catesbeiana	Rana catesbeiana
2000804293	DYIN	amphibian	Amphibia	Dyscophus	insularis	NA	ANTSOUHY TOMATO	FROG	LIV	150	NO	1050	MG	MG	T	W	C	C	2000-08-17	2000	2000-08-17	2000	I	MI	JP PETS	MADRAEX	NA	Dyscophus insularis	Dyscophus insularis
2000804293	MAAU	amphibian	Amphibia	Mantella	aurantiaca	NA	MALAGASY GOLDEN	MANTELLA	LIV	63	NO	378	MG	MG	T	W	C	C	2000-08-17	2000	2000-08-17	2000	I	MI	JP PETS	MADRAEX	NA	Mantella aurantiaca	Mantella aurantiaca
2000804293	MANB	amphibian	Amphibia	Mantella	betsileo	NA	BETSILEO GOLDEN	MANTELLA	LIV	62	NO	248	MG	MG	T	W	C	C	2000-08-17	2000	2000-08-17	2000	I	MI	JP PETS	MADRAEX	NA	Mantella betsileo	Mantella betsileo
2000804293	MANV	amphibian	Amphibia	Mantella	viridis	NA	GREEN GOLDEN	MANTELLA	LIV	62	NO	310	MG	MG	T	W	C	C	2000-08-17	2000	2000-08-17	2000	I	MI	JP PETS	MADRAEX	NA	Mantella viridis	Mantella viridis
2000804293	MCRO	amphibian	Amphibia	Mantella	crocea	NA	EASTERN GOLDEN	MANTELLA	LIV	63	NO	378	MG	MG	T	W	C	C	2000-08-17	2000	2000-08-17	2000	I	MI	JP PETS	MADRAEX	NA	Mantella crocea	Mantella crocea
2000804293	MNLA	amphibian	Amphibia	Mantella	laevigata	NA	FOLOHY GOLDEN	MANTELLA	LIV	63	NO	441	MG	MG	T	W	C	C	2000-08-17	2000	2000-08-17	2000	I	MI	JP PETS	MADRAEX	NA	Mantella laevigata	Mantella laevigata
2000804293	SCMR	amphibian	Amphibia	Scaphiophryne	marmorata	NA	MARBLED RAIN	FROG	LIV	25	NO	125	MG	MG	T	W	C	C	2000-08-17	2000	2000-08-17	2000	I	MI	JP PETS	MADRAEX	NA	Scaphiophryne marmorata	Scaphiophryne marmorata
2000811494	HYMB	amphibian	Amphibia	Hymenochirus	boettgeri	NA	ZAIRE DWARF CLAWED	FROG	LIV	1000	NO	110	HK	HK	T	U	C	C	2000-08-30	2000	2000-08-17	2000	I	TP	5-D TROPICAL, INC.	WUN FAT AQUARIUM	NA	Hymenochirus boettgeri	Hymenochirus boettgeri
2000824736	RABE	amphibian	Amphibia	Rana	berlandieri	NA	RIO GRANDE	FROG	LIV	200	KG	1256	MX	MX	T	W	C	C	2000-08-17	2000	2000-08-17	2000	I	BV	RANA LABORATORIES	ALVARO GARZA MONTALVO	NA	Rana berlandieri	Rana berlandieri
2000257030	MAAU	amphibian	Amphibia	Mantella	aurantiaca	NA	MALAGASY GOLDEN	MANTELLA	LIV	300	NO	1800	MG	MG	T	W	C	C	2000-08-18	2000	2000-08-18	2000	I	MI	ALBERT BAZAAR IMPORT-EXPORT	PANGEA IMPORT EXPORT	NA	Mantella aurantiaca	Mantella aurantiaca
2000257030	MMAD	amphibian	Amphibia	Mantella	madagascariensis	NA	MADAGASCAR GOLDEN	MANTELLA	LIV	300	NO	1200	MG	MG	T	W	C	C	2000-08-18	2000	2000-08-18	2000	I	MI	ALBERT BAZAAR IMPORT-EXPORT	PANGEA IMPORT EXPORT	NA	Mantella madagascariensis	Mantella madagascariensis
2000257145	AGCL	amphibian	Amphibia	Agalychnis	callidryas	NA	RED-EYED TREE	FROG	LIV	300	NO	2100	NI	NI	T	C	C	C	2000-08-18	2000	2000-08-18	2000	I	MI	EMERALD CORAL & REPTILE	ZOONICA S.A.	NA	Agalychnis callidryas	Agalychnis callidryas
2000778624	ANCT	amphibian	Amphibia	NA	NA	NA	NON-CITES	AMPHIBIANS	SPE	135	NO	0	PA	PA	S	W	C	C	2000-08-18	2000	2000-08-18	2000	I	HN	NA	NA	NA	Na na	NA
2000778645	ANCT	amphibian	Amphibia	NA	NA	NA	NON-CITES	AMPHIBIANS	SPE	182	NO	0	PA	PA	S	W	C	C	2000-08-18	2000	2000-08-18	2000	I	HN	NA	NA	NA	Na na	NA
2000789115	RACA	amphibian	Amphibia	Rana	catesbeiana	NA	NA	BULLFROG	LIV	279	KG	190	EC	EC	T	C	C	C	2000-08-23	2000	2000-08-18	2000	I	NW	TIN TIN FISH TRADING INC.	RODRIGUEZ, CARLOS	Original value in 'species' column: catesbeinana	Rana catesbeiana	Rana catesbeiana
2000793673	BUME	amphibian	Amphibia	Bufo	melanostictus	NA	BLACK-SPINED	TOAD	SKE	200	NO	2048	CN	CN	T	W	C	C	2000-08-18	2000	2000-08-18	2000	I	BA	C & A SCIENTIFIC CO., INC.	SHANGHAI CHANGHONG INTERNATIONAL TRADING	NA	Bufo melanostictus	Duttaphrynus melanostictus
2000794231	RACA	amphibian	Amphibia	Rana	catesbeiana	NA	NA	BULLFROG	LIV	948	NO	277	DO	DO	T	W	C	C	2000-09-13	2000	2000-08-18	2000	I	NW	NORTH SEA TRADING CORPORATION	HECTOR ANT TORO	Original value in 'species' column: catesbeinana	Rana catesbeiana	Rana catesbeiana
2000804443	SASA	amphibian	Amphibia	Salamandra	salamandra	NA	EUROPEAN FIRE	SALAMANDER	LIV	168	NO	1260	GB	GB	T	W	C	C	2000-08-18	2000	2000-08-18	2000	I	MI	GLADES HERP	THE LODGE	NA	Salamandra salamandra	Salamandra salamandra
2000789096	RACA	amphibian	Amphibia	Rana	catesbeiana	NA	NA	BULLFROG	LIV	492	KG	342	DO	DO	T	C	C	C	2000-08-23	2000	2000-08-19	2000	I	NW	TIN TIN FISH TRADING INC.	LIVE FROGS	Original value in 'species' column: catesbeinana	Rana catesbeiana	Rana catesbeiana
2000799051	CYPY	amphibian	Amphibia	Cynops	pyrrhogaster	NA	JAPANESE FIREBELLY	NEWT	LIV	75	NO	8	HK	HK	T	W	C	C	2000-08-22	2000	2000-08-19	2000	I	NY	TRANSSHIP DISCOUNTS LTD.	UNION TROPICAL FISH FARM	NA	Cynops pyrrhogaster	Cynops pyrrhogaster
2000799051	XELA	amphibian	Amphibia	Xenopus	laevis	NA	AFRICAN CLAWED	TOAD	LIV	4165	NO	679	HK	HK	T	W	C	C	2000-08-22	2000	2000-08-19	2000	I	NY	TRANSSHIP DISCOUNTS LTD.	UNION TROPICAL FISH FARM	NA	Xenopus laevis	Xenopus laevis
2000802608	HYMC	amphibian	Amphibia	Hymenochirus	curtipes	NA	W. DWARF CLAWED	FROG	LIV	900	NO	187	HK	HK	T	W	C	C	2000-08-22	2000	2000-08-19	2000	I	NY	ERDA INC.	BROTHER AQUARIUM	NA	Hymenochirus curtipes	Hymenochirus curtipes
2000805822	ANCT	amphibian	Amphibia	NA	NA	NA	NON-CITES	AMPHIBIANS	LIV	150	NO	375	CN	CN	T	R	C	C	2000-08-19	2000	2000-08-19	2000	I	LA	Z IMPORTS INC.	XIAOSHAN IMPORT & EXPORT CO	NA	Na na	NA
2000805822	BOOR	amphibian	Amphibia	Bombina	orientalis	NA	ORIENTAL FIREBELLY	TOAD	LIV	1500	NO	300	CN	CN	T	R	C	C	2000-08-19	2000	2000-08-19	2000	I	LA	Z IMPORTS INC.	XIAOSHAN IMPORT & EXPORT CO	NA	Bombina orientalis	Bombina orientalis
2000805822	CYOR	amphibian	Amphibia	Cynops	orientalis	NA	CHINESE DWARF	NEWT	LIV	500	NO	75	CN	CN	T	R	C	C	2000-08-19	2000	2000-08-19	2000	I	LA	Z IMPORTS INC.	XIAOSHAN IMPORT & EXPORT CO	NA	Cynops orientalis	Cynops orientalis
2000810527	CYPY	amphibian	Amphibia	Cynops	pyrrhogaster	NA	JAPANESE FIREBELLY	NEWT	LIV	100	NO	42	HK	HK	T	R	C	C	2000-08-19	2000	2000-08-19	2000	I	LA	DOLPHIN INTERNATIONAL	UNION TROPICAL FISH FARM LTD	NA	Cynops pyrrhogaster	Cynops pyrrhogaster
2000790943	BOOR	amphibian	Amphibia	Bombina	orientalis	NA	ORIENTAL FIREBELLY	TOAD	LIV	200	NO	54	CN	CN	T	W	C	C	2000-08-24	2000	2000-08-20	2000	I	NY	FISH MART INC.	SHANGHAI INTERNATIONAL TRADE & SERVICE	NA	Bombina orientalis	Bombina orientalis
2000805965	HYMC	amphibian	Amphibia	Hymenochirus	curtipes	NA	W. DWARF CLAWED	FROG	LIV	1350	NO	540	SG	SG	T	C	C	C	2000-08-20	2000	2000-08-20	2000	I	LA	AQUA-NAUTIC SPECIALIST	AQUANAUTICS SPECIALIST PTE LTD	NA	Hymenochirus curtipes	Hymenochirus curtipes
2000806239	CYOR	amphibian	Amphibia	Cynops	orientalis	NA	CHINESE DWARF	NEWT	LIV	1275	NO	147	HK	HK	T	W	C	C	2000-08-20	2000	2000-08-20	2000	I	LA	DOLPHIN INTERNATIONAL	SANWOO FISHERIES	NA	Cynops orientalis	Cynops orientalis
2000810639	LICA	amphibian	Amphibia	Litoria	caerulea	NA	WHITE'S TREE	FROG	LIV	150	NO	150	ID	ID	T	W	C	C	2000-08-20	2000	2000-08-20	2000	I	LA	DOLPHIN INTERNATIONAL	P.T. VIVARIA INDONESIA	NA	Litoria caerulea	Litoria caerulea
2000810639	OOLI	amphibian	Amphibia	Occidozyga	lima	NA	PADDY	FROG	LIV	1200	NO	60	ID	ID	T	W	C	C	2000-08-20	2000	2000-08-20	2000	I	LA	DOLPHIN INTERNATIONAL	P.T. VIVARIA INDONESIA	Original value in 'genus' column: ooedozyga	Occidozyga lima	Occidozyga lima
2000817424	NA	amphibian	Amphibia	Leptolalax	peloclytoicles	NA	NA	NA	SPE	2	NO	1	VN	CA	S	W	C	C	2000-08-23	2000	2000-08-20	2000	I	NY	DEPARTMENT OF HERPETOLOGY	CBCB ROYAL ONTARIO MUSEUM	NA	Leptolalax peloclytoicles	NA
2000789113	RACA	amphibian	Amphibia	Rana	catesbeiana	NA	NA	BULLFROG	LIV	470	KG	301	DO	DO	T	C	C	C	2000-08-23	2000	2000-08-21	2000	I	NW	TIN TIN FISH TRADING INC.	LIVE FROGS	Original value in 'species' column: catesbeinana	Rana catesbeiana	Rana catesbeiana
2000790791	ANCT	amphibian	Amphibia	NA	NA	NA	NON-CITES	AMPHIBIANS	SPE	6	NO	0	PG	PG	non-standard value	W	C	C	2000-08-29	2000	2000-08-21	2000	I	HA	KISHINAMI, CARLA	SINGADAN, ROSE	Original value in 'purpose' column: N	Na na	NA
2000794561	RACA	amphibian	Amphibia	Rana	catesbeiana	NA	NA	BULLFROG	SPE	20	NO	17	MX	MX	T	W	C	C	2000-08-22	2000	2000-08-21	2000	I	NG	RANACO CORPORATION	P.A.M.E.E.S.A.	Original value in 'species' column: catesbeinana	Rana catesbeiana	Rana catesbeiana
2000794561	RAFO	amphibian	Amphibia	Rana	forreri	NA	FORRER'S GRASS	FROG	SPE	4690	NO	1710	MX	MX	T	W	C	C	2000-08-22	2000	2000-08-21	2000	I	NG	RANACO CORPORATION	P.A.M.E.E.S.A.	NA	Rana forreri	Rana forreri
2000789103	RACA	amphibian	Amphibia	Rana	catesbeiana	NA	NA	BULLFROG	LIV	960	NO	280	DO	DO	T	C	C	C	2000-08-24	2000	2000-08-22	2000	I	NW	NORTH SEA TRADING CORPORATION	HECTOR ANT. TORO	Original value in 'species' column: catesbeinana	Rana catesbeiana	Rana catesbeiana
2000793367	RACA	amphibian	Amphibia	Rana	catesbeiana	NA	NA	BULLFROG	LIV	554	KG	336	EC	EC	T	W	C	C	2000-08-30	2000	2000-08-22	2000	I	NW	TIN TIN FISH TRADING INC.	RODRIGUEZ CARLOS	Original value in 'species' column: catesbeinana	Rana catesbeiana	Rana catesbeiana
2000803677	LICA	amphibian	Amphibia	Litoria	caerulea	NA	WHITE'S TREE	FROG	LIV	200	NO	514	ID	ID	T	W	C	C	2000-08-22	2000	2000-08-22	2000	I	LA	BUSHMASTER REPTILES	C.V. TERRARIA INDONESIA	NA	Litoria caerulea	Litoria caerulea
2000803677	MENA	amphibian	Amphibia	Megophrys	nasuta	NA	SPADEFOOT	TOAD	LIV	50	NO	257	ID	ID	T	W	C	C	2000-08-22	2000	2000-08-22	2000	I	LA	BUSHMASTER REPTILES	C.V. TERRARIA INDONESIA	NA	Megophrys nasuta	Pelobatrachus nasuta
2000789111	RACA	amphibian	Amphibia	Rana	catesbeiana	NA	NA	BULLFROG	LIV	746	KG	450	DO	DO	T	C	C	C	2000-08-23	2000	2000-08-23	2000	I	NW	TIN TIN FISH TRADING INC.	LIVE FROGS	Original value in 'species' column: catesbeinana	Rana catesbeiana	Rana catesbeiana
2000803656	HEMM	amphibian	Amphibia	Hemisus	marmoratus	NA	MARBLED SHOVELNOSE	FROG	LIV	78	NO	39	TZ	TZ	T	W	C	C	2000-08-23	2000	2000-08-23	2000	I	LA	L. A. REPTILE	KISASE INVESTMENT	NA	Hemisus marmoratus	Hemisus marmoratus
2000803656	PBIF	amphibian	Amphibia	Phrynomantis	bifasciatus	NA	S AFR SNAKE-NECK	FROG	LIV	178	NO	89	TZ	TZ	T	W	C	C	2000-08-23	2000	2000-08-23	2000	I	LA	L. A. REPTILE	KISASE INVESTMENT	NA	Phrynomantis bifasciatus	Phrynomantis bifasciatus
2000811827	BOOR	amphibian	Amphibia	Bombina	orientalis	NA	ORIENTAL FIREBELLY	TOAD	LIV	3500	NO	350	CN	CN	T	W	C	C	2000-08-23	2000	2000-08-23	2000	I	LA	GOLDEN POND	XIAOSHAN IMP & EXP CORP	NA	Bombina orientalis	Bombina orientalis
2000794085	ANCT	amphibian	Amphibia	NA	NA	NA	NON-CITES	AMPHIBIANS	LIV	1900	NO	200	NG	NG	T	W	C	C	2000-08-29	2000	2000-08-24	2000	I	NY	OKUOLU INTERNATIONAL USA INC.	OKUOLU INTERNATIONAL	NA	Na na	NA
2000797897	RACA	amphibian	Amphibia	Rana	catesbeiana	NA	NA	BULLFROG	LIV	3000	NO	945	TW	TW	T	W	C	C	2000-08-24	2000	2000-08-24	2000	I	NY	HOY LUNG SEAFOOD CORPORATION	HORREI FISHERY CO	Original value in 'species' column: catesbeinana	Rana catesbeiana	Rana catesbeiana
2000798220	RACA	amphibian	Amphibia	Rana	catesbeiana	NA	NA	BULLFROG	LIV	1470	KG	1029	CN	CN	T	W	C	C	2000-08-24	2000	2000-08-24	2000	I	NY	KIN YICK TRADING CORPORATION	ESTATE GALLERY INTERNATIONAL	Original value in 'species' column: catesbeinana	Rana catesbeiana	Rana catesbeiana
2000807772	RACA	amphibian	Amphibia	Rana	catesbeiana	NA	NA	BULLFROG	LEG	7893	KG	44671	TW	TW	T	W	C	C	2000-08-22	2000	2000-08-24	2000	I	LA	SEA PORT PRODUCTS CORP.	MARNEX COMPANY	Original value in 'species' column: catesbeinana	Rana catesbeiana	Rana catesbeiana
2000811519	HYMB	amphibian	Amphibia	Hymenochirus	boettgeri	NA	ZAIRE DWARF CLAWED	FROG	LIV	2000	NO	220	HK	HK	T	U	C	C	2000-08-24	2000	2000-08-24	2000	I	TP	5-D TROPICAL, INC.	WUN FAT AQUARIUM	NA	Hymenochirus boettgeri	Hymenochirus boettgeri
2000812328	RACA	amphibian	Amphibia	Rana	catesbeiana	NA	NA	BULLFROG	LEG	19051	KG	109310	TW	TW	T	W	C	C	2000-08-24	2000	2000-08-24	2000	I	LA	SEA PORT PRODUCTS CORP.	MARNEX COMPANY	Original value in 'species' column: catesbeinana	Rana catesbeiana	Rana catesbeiana
2000817607	RACA	amphibian	Amphibia	Rana	catesbeiana	NA	NA	BULLFROG	SPE	7	NO	0	US	ES	S	W	C	C	2000-08-31	2000	2000-08-24	2000	I	BA	SMITHSONIAN INSTUTITION	MUSEO NACIONAL DE CIENCIAS NATURALES	Original value in 'species' column: catesbeinana	Rana catesbeiana	Rana catesbeiana
2000793452	RACA	amphibian	Amphibia	Rana	catesbeiana	NA	NA	BULLFROG	LIV	462	KG	345	EC	EC	T	C	C	C	2000-08-28	2000	2000-08-25	2000	I	NW	TIN TIN FISH TRADING INC.	CARLOS NENDOZA RODRIGUEZ	Original value in 'species' column: catesbeinana	Rana catesbeiana	Rana catesbeiana
2000809392	RACA	amphibian	Amphibia	Rana	catesbeiana	NA	NA	BULLFROG	LIV	1320	NO	385	DO	DO	T	C	C	C	2000-09-05	2000	2000-08-25	2000	I	NW	NORTH SEA TRADING CORPORATION	HECTOR ANT TORO	Original value in 'species' column: catesbeinana	Rana catesbeiana	Rana catesbeiana
2000791425	RMAC	amphibian	Amphibia	Rana	macrodon	NA	NA	BULLFROG	LPS	9	NO	235	ID	IT	T	W	C	C	2000-08-31	2000	2000-08-26	2000	I	NY	PRADA USA CORP.	I PELLETTEERI D' ITALIA S.P.A.	NA	Rana macrodon	NA
2000803769	CYPY	amphibian	Amphibia	Cynops	pyrrhogaster	NA	JAPANESE FIREBELLY	NEWT	LIV	225	NO	25	HK	HK	T	W	C	C	2000-08-28	2000	2000-08-26	2000	I	NY	TRANSSHIP DISCOUNTS LTD.	UNION TROPICAL FISH FARM	NA	Cynops pyrrhogaster	Cynops pyrrhogaster
2000803769	XELA	amphibian	Amphibia	Xenopus	laevis	NA	AFRICAN CLAWED	TOAD	LIV	75	NO	75	HK	HK	T	W	C	C	2000-08-28	2000	2000-08-26	2000	I	NY	TRANSSHIP DISCOUNTS LTD.	UNION TROPICAL FISH FARM	NA	Xenopus laevis	Xenopus laevis
2000803769	XELA	amphibian	Amphibia	Xenopus	laevis	NA	AFRICAN CLAWED	TOAD	LIV	3500	NO	525	HK	HK	T	W	C	C	2000-08-28	2000	2000-08-26	2000	I	NY	TRANSSHIP DISCOUNTS LTD.	UNION TROPICAL FISH FARM	NA	Xenopus laevis	Xenopus laevis
2000807578	BUME	amphibian	Amphibia	Bufo	melanostictus	NA	BLACK-SPINED	TOAD	SPE	2	NO	0	VN	VN	S	W	C	C	2000-09-22	2000	2000-08-26	2000	I	LA	CENTER FOR BIODIVERSITY	INSTITUTE OF ECOLOGY AND BIOLOGICAL RESOURCES	NA	Bufo melanostictus	Duttaphrynus melanostictus
2000810129	OOLI	amphibian	Amphibia	Occidozyga	lima	NA	PADDY	FROG	LIV	150	NO	6	ID	ID	T	W	C	C	2000-08-26	2000	2000-08-26	2000	I	LA	DOLPHIN INTERNATIONAL	VIVAJAYA INTERNATIONAL	Original value in 'genus' column: ooedozyga	Occidozyga lima	Occidozyga lima
2000810879	HYMC	amphibian	Amphibia	Hymenochirus	curtipes	NA	W. DWARF CLAWED	FROG	LIV	80	NO	48	SG	SG	T	W	C	C	2000-08-27	2000	2000-08-26	2000	I	LA	TROPICAL FISH CONSOLIDATORS LTD.	SUNSHINE AQUARIUM	NA	Hymenochirus curtipes	Hymenochirus curtipes
2000817786	BOOR	amphibian	Amphibia	Bombina	orientalis	NA	ORIENTAL FIREBELLY	TOAD	LIV	60	NO	54	HK	HK	T	W	C	C	2000-08-28	2000	2000-08-26	2000	I	NY	ERDA INC.	BROTHER AQUARIUM	NA	Bombina orientalis	Bombina orientalis
2000790774	RMAC	amphibian	Amphibia	Rana	macrodon	NA	NA	BULLFROG	LPS	3	NO	78	ID	IT	T	W	C	C	2000-08-29	2000	2000-08-27	2000	I	HA	PRADA HAWAII CORP.	SEDE LEGALE VIA FOGAZZARO	NA	Rana macrodon	NA
2000793446	RACA	amphibian	Amphibia	Rana	catesbeiana	NA	NA	BULLFROG	LIV	959	KG	345	DO	DO	T	C	C	C	2000-08-28	2000	2000-08-27	2000	I	NW	TIN TIN FISH TRADING INC.	LIVE FROGS	Original value in 'species' column: catesbeinana	Rana catesbeiana	Rana catesbeiana
2000797398	ANCT	amphibian	Amphibia	NA	NA	NA	NON-CITES	AMPHIBIANS	LIV	75	NO	7	ID	ID	T	W	C	C	2000-08-28	2000	2000-08-27	2000	I	NY	TRANSSHIP DISCOUNTS LTD.	VIVAJAYA INTERNATIONAL	NA	Na na	NA
2000806958	ANCT	amphibian	Amphibia	NA	NA	NA	NON-CITES	AMPHIBIANS	LIV	240	NO	100	CN	CN	T	W	C	C	2000-08-27	2000	2000-08-27	2000	I	LA	DOLPHIN INTERNATIONAL	SHANGHAI GOLDEN FIELD GARDENING CO. LTD.	NA	Na na	NA
2000806958	BOOR	amphibian	Amphibia	Bombina	orientalis	NA	ORIENTAL FIREBELLY	TOAD	LIV	5500	NO	1899	CN	CN	T	W	C	C	2000-08-27	2000	2000-08-27	2000	I	LA	DOLPHIN INTERNATIONAL	SHANGHAI GOLDEN FIELD GARDENING CO. LTD.	NA	Bombina orientalis	Bombina orientalis
2000806958	CYPY	amphibian	Amphibia	Cynops	pyrrhogaster	NA	JAPANESE FIREBELLY	NEWT	LIV	8250	NO	809	CN	CN	T	W	C	C	2000-08-27	2000	2000-08-27	2000	I	LA	DOLPHIN INTERNATIONAL	SHANGHAI GOLDEN FIELD GARDENING CO. LTD.	NA	Cynops pyrrhogaster	Cynops pyrrhogaster
2000806959	LICA	amphibian	Amphibia	Litoria	caerulea	NA	WHITE'S TREE	FROG	LIV	25	NO	20	ID	ID	T	W	C	C	2000-08-27	2000	2000-08-27	2000	I	LA	DOLPHIN INTERNATIONAL	VIVAJAYA INTERNATIONAL	NA	Litoria caerulea	Litoria caerulea
2000806959	OOLI	amphibian	Amphibia	Occidozyga	lima	NA	PADDY	FROG	LIV	900	NO	36	ID	ID	T	W	C	C	2000-08-27	2000	2000-08-27	2000	I	LA	DOLPHIN INTERNATIONAL	VIVAJAYA INTERNATIONAL	Original value in 'genus' column: ooedozyga	Occidozyga lima	Occidozyga lima
2000810130	CYOR	amphibian	Amphibia	Cynops	orientalis	NA	CHINESE DWARF	NEWT	LIV	3725	NO	308	HK	HK	T	W	C	C	2000-08-27	2000	2000-08-27	2000	I	LA	DOLPHIN INTERNATIONAL	SANWOO FISHERIES	NA	Cynops orientalis	Cynops orientalis
2000810130	HYMC	amphibian	Amphibia	Hymenochirus	curtipes	NA	W. DWARF CLAWED	FROG	LIV	3640	NO	437	HK	HK	T	W	C	C	2000-08-27	2000	2000-08-27	2000	I	LA	DOLPHIN INTERNATIONAL	SANWOO FISHERIES	NA	Hymenochirus curtipes	Hymenochirus curtipes
2000810130	TYVE	amphibian	Amphibia	Tylototriton	verrucosus	NA	CROCODILE	NEWT	LIV	150	NO	203	HK	HK	T	W	C	C	2000-08-27	2000	2000-08-27	2000	I	LA	DOLPHIN INTERNATIONAL	SANWOO FISHERIES	NA	Tylototriton verrucosus	Tylototriton verrucosus
2000810991	HYMC	amphibian	Amphibia	Hymenochirus	curtipes	NA	W. DWARF CLAWED	FROG	LIV	1050	NO	69	ID	ID	T	W	C	C	2000-08-27	2000	2000-08-27	2000	I	LA	DOLPHIN INTERNATIONAL	P.T. VIVARIA INDONESIA	NA	Hymenochirus curtipes	Hymenochirus curtipes
2000810991	LICA	amphibian	Amphibia	Litoria	caerulea	NA	WHITE'S TREE	FROG	LIV	430	NO	460	ID	ID	T	W	C	C	2000-08-27	2000	2000-08-27	2000	I	LA	DOLPHIN INTERNATIONAL	P.T. VIVARIA INDONESIA	NA	Litoria caerulea	Litoria caerulea
2000810991	OOLI	amphibian	Amphibia	Occidozyga	lima	NA	PADDY	FROG	LIV	900	NO	45	ID	ID	T	W	C	C	2000-08-27	2000	2000-08-27	2000	I	LA	DOLPHIN INTERNATIONAL	P.T. VIVARIA INDONESIA	Original value in 'genus' column: ooedozyga	Occidozyga lima	Occidozyga lima
2000811097	BUME	amphibian	Amphibia	Bufo	melanostictus	NA	BLACK-SPINED	TOAD	LIV	90	NO	36	VN	VN	T	W	C	C	2000-08-27	2000	2000-08-27	2000	I	LA	UNIVERSAL AQUATIC	CORIMEX	NA	Bufo melanostictus	Duttaphrynus melanostictus
2000811097	KALO	amphibian	Amphibia	Kaloula	pulchra	NA	ASIATIC PAINTED	FROG	LIV	170	NO	68	VN	VN	T	W	C	C	2000-08-27	2000	2000-08-27	2000	I	LA	UNIVERSAL AQUATIC	CORIMEX	NA	Kaloula pulchra	Kaloula pulchra
2000811097	RLEU	amphibian	Amphibia	Rhacophorus	leucomystax	NA	FLYING	FROG	LIV	28	NO	112	VN	VN	T	W	C	C	2000-08-27	2000	2000-08-27	2000	I	LA	UNIVERSAL AQUATIC	CORIMEX	NA	Rhacophorus leucomystax	NA
2000811850	HYMC	amphibian	Amphibia	Hymenochirus	curtipes	NA	W. DWARF CLAWED	FROG	LIV	250	NO	100	SG	SG	T	W	C	C	2000-08-27	2000	2000-08-27	2000	I	LA	AQUACO, INC.	SUNRISE AQUARIUM PTE LTD	NA	Hymenochirus curtipes	Hymenochirus curtipes
[truncated: 47,547 more rows]
