# Supplementary material for: Gaps in global wildlife trade monitoring leave amphibians vulnerable
Source: eLife. 2021 Aug 12;10:e70086. doi: 10.7554/eLife.70086 (PMC8425949; doi:10.7554/eLife.70086)
Supplement: Source data 8. [file elife-70086-data8.csv]

TaxonId	Kingdom	Phylum	Class	Order	Family	Genus	Species	Subspecies	FullName	AuthorYear	RankName	CurrentListing	FullAnnotationEnglish	AnnotationEnglish	AnnotationSpanish	AnnotationFrench	#AnnotationSymbol	#Annotation	SynonymsWithAuthors	EnglishNames	SpanishNames	FrenchNames	CitesAccepted	All_DistributionISOCodes	All_DistributionFullNames	NativeDistributionFullNames	Introduced_Distribution	Introduced(?)_Distribution	Reintroduced_Distribution	Extinct_Distribution	Extinct(?)_Distribution	Distribution_Uncertain
1840	Animalia	Chordata	Amphibia	Anura	Dendrobatidae	Adelphobates			Adelphobates		GENUS	II	Appendix II:Formerly included in <i>Dendrobates</i> spp., prior to taxonomic change adopted at CoP16.	Appendix II:Formerly included in <i>Dendrobates</i> spp.	Appendix II:Anteriormente incluida en <i>Dendrobates</i> spp.	Appendix II:Précédemment inscrit sous <i>Dendrobates</i> spp.		Appendix II:					true
7222	Animalia	Chordata	Amphibia	Anura	Dendrobatidae	Adelphobates	castaneoticus		Adelphobates castaneoticus	(Caldwell & Myers, 1990)	SPECIES	II	Appendix II:Formerly included in <i>Dendrobates</i> spp., prior to taxonomic change adopted at CoP16.	Appendix II:Formerly included in <i>Dendrobates</i> spp.	Appendix II:Anteriormente incluida en <i>Dendrobates</i> spp.	Appendix II:Précédemment inscrit sous <i>Dendrobates</i> spp.		Appendix II:	Adelphobates castaneoticus Grant, Frost, Caldwell, Gagliardo, Haddad, Kok, Means, Noonan, Schargel & Wheeler, 2006, Dendrobates castaneoticus Caldwell & Myers, 1990, Adelphobtes castaneoticus	Brazil-nut Poison Frog		Dendrobate du Xingu	true	BR	Brazil	Brazil
6151	Animalia	Chordata	Amphibia	Anura	Dendrobatidae	Adelphobates	galactonotus		Adelphobates galactonotus	(Steindachner, 1864)	SPECIES	II	Appendix II:Formerly included in <i>Dendrobates</i> spp., prior to taxonomic change adopted at CoP16.	Appendix II:Formerly included in <i>Dendrobates</i> spp.	Appendix II:Anteriormente incluida en <i>Dendrobates</i> spp.	Appendix II:Précédemment inscrit sous <i>Dendrobates</i> spp.		Appendix II:	Dendrobates paraensis Boulenger, 1913, Dendrobates galactonotus Steindachner, 1864, Adelphobates galactonotus Grant, Frost, Caldwell, Gagliardo, Haddad, Kok, Means, Noonan, Schargel & Wheeler, 2006	Splash-backed Poison Frog		Dendrobate du Tapajos	true	BR	Brazil	Brazil
4739	Animalia	Chordata	Amphibia	Anura	Dendrobatidae	Adelphobates	quinquevittatus		Adelphobates quinquevittatus	(Steindachner, 1864)	SPECIES	II	Appendix II:Formerly included in <i>Dendrobates</i> spp., prior to taxonomic change adopted at CoP16.	Appendix II:Formerly included in <i>Dendrobates</i> spp.	Appendix II:Anteriormente incluida en <i>Dendrobates</i> spp.	Appendix II:Précédemment inscrit sous <i>Dendrobates</i> spp.		Appendix II:	Dendrobates tinctorius quinquevittatus (Schneider, 1799), Dendrobates tinctorius var. quinquevittatus Steindachner, 1864, Dendrobates tinctorius igneus (Schneider, 1799), Adelphobtes quinquevittatus Grant, Frost, Caldwell, Gagliardo, Haddad, Kok, Means, Noonan, Schargel & Wheeler, 2006, Dendrobates quinquevittatus Silverstone, 1975, Dendrobates quinquevittatus Jan, 1857, Dendrobates quinquevittat…	Amazonian Poison-Arrow Frog, Rio Madeira Poison Frog	Rana de punta de flecha pentaestriada	Dendrobate à cinq bandes	true	BO, BR, PE	Bolivia (Plurinational State of), Brazil, Peru	Bolivia (Plurinational State of), Brazil, Peru
1507	Animalia	Chordata	Amphibia	Anura	Hylidae	Agalychnis			Agalychnis	Cope, 1864	GENUS	II	Appendix II:	Appendix II:	Appendix II:	Appendix II:		Appendix II:					true
5221	Animalia	Chordata	Amphibia	Anura	Hylidae	Agalychnis	annae		Agalychnis annae	(Duellman, 1963)	SPECIES	II	Appendix II:	Appendix II:	Appendix II:	Appendix II:		Appendix II:	Phyllomedusa annae Duellman, 1963	Blue-sided Leaf Frog, Blue-sided treefrog, Orange-eyed tree frog	rana azul	Rrainette arboricole à côtes bleues	true	CR	Costa Rica	Costa Rica
9748	Animalia	Chordata	Amphibia	Anura	Hylidae	Agalychnis	callidryas		Agalychnis callidryas	(Cope, 1862)	SPECIES	II	Appendix II:	Appendix II:	Appendix II:	Appendix II:		Appendix II:	Agalychnis callidryas Duellman, 1968, Agalychnis helenae Cope, 1885 "1884", Agalychnis callidryas Cope, 1864, Hyla callidryas Cope, 1862, Phyllomedusa (agalychnis) helenae Lutz, 1950, Agalychnis callidryas taylori Funkhouser, 1957, Phyllomedusa helenae Kellogg, 1932, Agalychnis callidryas callidryas Funkhouser, 1957, Phyllomedusa (agalychnis) callidryas Lutz, 1950, Phyllomedusa callidryas Savage …	Red-eyed Leaf Frog, Red-eyed treefrog	Rana arbórea de ojos rojos, Rana calzonuda	Grenouille aux yeux rouges, Rainette aux yeux rouges	true	BZ, CO, CR, GT, HN, MX, NI, PA	Belize, Colombia, Costa Rica, Guatemala, Honduras, Mexico, Nicaragua, Panama	Belize, Colombia, Costa Rica, Guatemala, Honduras, Mexico, Nicaragua, Panama
4879	Animalia	Chordata	Amphibia	Anura	Hylidae	Agalychnis	moreletii		Agalychnis moreletii	(Duméril, 1853)	SPECIES	II	Appendix II:	Appendix II:	Appendix II:	Appendix II:		Appendix II:	Hyla holochlora Salvin, 1860, Agalychnis holochlora Cope, 1865, Agalychnis moreletii Cope, 1865, Hyla moreletii Duméril, 1853, Agalychnis moreletti Liner & Casas-Andreu, 2008, Phyllomedusa (agalychnis) moreletii Lutz, 1950, Phyllomedusa moreletii Kellogg, 1932, Hyla morelettii Keferstein, 1868	Black-eyed leaf frog, Morelet's Leaf Frog, Morelet's treefrog	Escuerzo, Rana de Ojos Negros, Rana Maki, Rana Morelet	Rainette arboricole de Morelet	true	BZ, SV, GT, HN, MX	Belize, El Salvador, Guatemala, Honduras, Mexico	Belize, El Salvador, Guatemala, Honduras, Mexico
10792	Animalia	Chordata	Amphibia	Anura	Hylidae	Agalychnis	saltator		Agalychnis saltator	Taylor, 1955	SPECIES	II	Appendix II:	Appendix II:	Appendix II:	Appendix II:		Appendix II:	Phyllomedusa saltator Funkhouser, 1957	Misfit Leaf Frog	Rana saltadora		true	CR, HN, NI	Costa Rica, Honduras, Nicaragua	Costa Rica, Honduras, Nicaragua
5702	Animalia	Chordata	Amphibia	Anura	Hylidae	Agalychnis	spurrelli		Agalychnis spurrelli	Boulenger, 1913	SPECIES	II	Appendix II:	Appendix II:	Appendix II:	Appendix II:		Appendix II:	Phyllomedusa litodryas (Duellman and Trueb, 1967), Phyllomedusa spurrelli (Funkhouser, 1957), Agalychnis litodryas Duellman, 1968, Agalychnis litodryas (Duellman & Trueb, 1967)	Gliding Leaf Frog, Gliding treefrog	Rana deslizadora	Grenouille d'arbre de spurrelli	true	CO, CR, EC, PA	Colombia, Costa Rica, Ecuador, Panama	Colombia, Costa Rica, Ecuador, Panama
6626	Animalia	Chordata	Amphibia	Anura	Aromobatidae	Allobates	femoralis		Allobates femoralis	(Boulenger, 1884)	SPECIES	II	Appendix II:	Appendix II:	Appendix II:	Appendix II:		Appendix II:	Dendrobates femoralis Myers, Daly & Malkin, 1978, Prostherapis femoralis Boulenger, 1884, Allobates femoralis Grant, Frost, Caldwell, Gagliardo, Haddad, Kok, Means, Noonan, Schargel & Wheeler, 2006, Phyllobates femoralis Barbour & Noble, 1920, Allobates femoralis Zimmermann & Zimmermann, 1988, Phyllobates femoralis (Boulenger, 1884), Epipedobates femoralis (Boulenger, 1884), Epipedobates femorali…	Brilliant-thighed Poison Frog		Epipedobate fémorale, Epipedobate simisimi, Simisimi	true	BO, BR, CO, EC, GF, GY, PE, SR, VE	Bolivia (Plurinational State of), Brazil, Colombia, Ecuador, French Guiana [FR], Guyana, Peru, Suriname, Venezuela (Bolivarian Republic of)	Bolivia (Plurinational State of), Brazil, Colombia, Ecuador, French Guiana [FR], Guyana, Peru, Suriname, Venezuela (Bolivarian Republic of)
4162	Animalia	Chordata	Amphibia	Anura	Aromobatidae	Allobates	hodli		Allobates hodli	Simões, Lima & Farias, 2010	SPECIES	II	Appendix II:Formerly included in <i>Allobates femoralis</i>, prior to taxonomic change adopted at CoP16.	Appendix II:Formerly included in <i>Allobates femoralis</i>.	Appendix II:Anteriormente incluida en <i>Allobates femoralis</i>.	Appendix II:Précédemment inscrit sous <i>Allobates femoralis</i>.		Appendix II:					true	BR	Brazil	Brazil
4779	Animalia	Chordata	Amphibia	Anura	Aromobatidae	Allobates	myersi		Allobates myersi	(Pyburn, 1981)	SPECIES	II	Appendix II:Formerly included in <i>Epipedobates</i> spp., prior to taxonomic change adopted at CoP16.	Appendix II:Formerly included in <i>Epipedobates</i> spp.	Appendix II:Anteriormente incluida en <i>Epipedobates</i> spp.	Appendix II:Précédemment inscrit sous <i>Epipedobates</i> spp.		Appendix II:	Ameerega myersi Frost, Grant, Faivovich, Bain, Haas, Haddad, de Sá, Channing, Wilkinson, Donnellan, Raxworthy, Campbell, Blotto, Moler, Drewes, Nussbaum, Lynch, Green & Wheeler, 2006, Dendrobates myersi Pyburn, 1981, Epipedobates myersi Myers, 1987	Myers's Poison Frog	Rana de punta de flecha de Myers	Epipedobate de Myers	true	BR, CO, PE	Brazil, Colombia, Peru	Colombia						Brazil, Peru
9758	Animalia	Chordata	Amphibia	Anura	Aromobatidae	Allobates	zaparo		Allobates zaparo	(Silverstone, 1976)	SPECIES	II	Appendix II:	Appendix II:	Appendix II:	Appendix II:		Appendix II:	Epipedobates zaparo Myers, 1987, Epipedobates zaparo (Silverstone, 1976), Phyllobates zaparo Silverstone, 1976, Dendrobates zaparo (Silverstone, 1976), Dendrobates zaparo Myers, Daly & Malkin, 1978, Allobates zaparo Vences, Kosuch, Boistel, Haddad, La Marca & Lötters, 2003	Sanguine poison-arrow frog, Sanguine Poison Frog, Zaparo's Poison Frog	Rana venenosa	Epipedobate zaparo	true	EC, PE	Ecuador, Peru	Ecuador, Peru
1438	Animalia	Chordata	Amphibia	Anura	Bufonidae	Altiphrynoides			Altiphrynoides	Dubois, 1987	GENUS	I	Appendix I:	Appendix I:Formerly included in <i>Nectophrynoides</i> spp.	Appendix I:Anteriormente incluida en <i>Nectophrynoides</i> spp.	Appendix I:Précédemment inscrit sous <i>Nectophrynoides</i> spp.		Appendix I:					true
7900	Animalia	Chordata	Amphibia	Anura	Bufonidae	Altiphrynoides	malcolmi		Altiphrynoides malcolmi	Grandison, 1978	SPECIES	I	Appendix I:	Appendix I:Formerly included in <i>Nectophrynoides</i> spp.	Appendix I:Anteriormente incluida en <i>Nectophrynoides</i> spp.	Appendix I:Précédemment inscrit sous <i>Nectophrynoides</i> spp.		Appendix I:	Nectophrynoides malcolmi Grandison,1978	Ethiopian mountain toad, Malcolm's Ethiopian Toad, Malcolm's ethiopia toad	Sapo vivíparo de Malcolm	Nectophrynoide de Malcolm	false	ET	Ethiopia	Ethiopia
8571	Animalia	Chordata	Amphibia	Anura	Bufonidae	Altiphrynoides	osgoodi		Altiphrynoides osgoodi	(Loveridge, 1932)	SPECIES	I	Appendix I:	Appendix I:Formerly included in <i>Nectophrynoides</i> spp.	Appendix I:Anteriormente incluida en <i>Nectophrynoides</i> spp.	Appendix I:Précédemment inscrit sous <i>Nectophrynoides</i> spp.		Appendix I:	Spinophrynoides osgoodi Dubois, 1987 "1986", Nectophrynoides osgoodi (Loveridge, 1932), Bufo osgoodi Loveridge, 1932, Nectophrynoides osgoodi Grandison, 1978, Spinophrynoides osgoodi (Loveridge, 1932), Altiphrynoides osgoodi Frost, Grant, Faivovich, Bain, Haas, Haddad, de Sá, Channing, Wilkinson, Donnellan, Raxworthy, Campbell, Blotto, Moler, Drewes, Nussbaum, Lynch, Green & Wheeler, 2006	Osgood's Ethiopian Toad	Sapo vivíparo de Osgood	Nectophrynoide d'Ethiopie, Nectophrynoide d'Osgood	true	ET	Ethiopia	Ethiopia
6985	Animalia	Chordata	Amphibia	Caudata	Ambystomatidae	Ambystoma	dumerilii		Ambystoma dumerilii	(Dugès, 1870)	SPECIES	II	Appendix II:	Appendix II:	Appendix II:	Appendix II:		Appendix II:	Bathysiredon dumerilii dumerilii Maldonado-Koerdell, 1948, Bathysiredon dumerilii queretarensis Maldonado-Koerdell, 1948, Bathysiredon dumerilii Smith and Necker, 1943, Ambystoma queretarense Smith and Smith, 1976, Amblystoma dumerili Cope, 1889, Ambystoma (bathysiredon) dumerilii Tihen, 1958, Siredon dumerilii Smith, 1939, Ambystoma dumerili Lafrentz, 1930, Bathysiredon dumerilii (Dugès, 1839), …	Achoque, Lake Patzcuaro Salamander	Ajolote de lago Pátzquaro, Salamandra del lago Patzcuaro	Salamandre du lac Pàtzcuaro	true	MX	Mexico	Mexico
6110	Animalia	Chordata	Amphibia	Caudata	Ambystomatidae	Ambystoma	mexicanum		Ambystoma mexicanum	(Shaw & Nodder, 1798)	SPECIES	II	Appendix II:	Appendix II:	Appendix II:	Appendix II:		Appendix II:	Siredon mexicanum Baird, 1850 "1849", Siren pisciformis Shaw, 1802, Gyrinus mexicanus Shaw & Nodder, 1798, Ambystoma weismanni Wiedersheim, 1879, Stegoporus pisciformis (Shaw, 1802), Hypochton pisciformis (Shaw, 1802), Triton mexicanus Oppel, 1811, Siredon axolotl Wagler, 1830, Siredon edule Dugès, 1888, Stegoporus mexicanus (Shaw & Nodder, 1798), Axolotl pisciformis (Shaw, 1802), Axolotus piscif…	Axolotl	Ajolote mexicano, Salamandra mexicana	Ambystome du Mexique, Axolotl, Salamandre du Mexique	true	MX	Mexico	Mexico
696	Animalia	Chordata	Amphibia	Anura	Dendrobatidae	Ameerega			Ameerega	Bauer, 1986	GENUS	II	Appendix II:Formerly included in <i>Epipedobates</i> spp., prior to taxonomic change adopted at CoP16.	Appendix II:Formerly included in <i>Epipedobates</i> spp.	Appendix II:Anteriormente incluida en <i>Epipedobates</i> spp.	Appendix II:Précédemment inscrit sous <i>Epipedobates</i> spp.		Appendix II:					true
5353	Animalia	Chordata	Amphibia	Anura	Dendrobatidae	Ameerega	altamazonica		Ameerega altamazonica	Twomey & Brown, 2008	SPECIES	II	Appendix II:Formerly included in <i>Epipedobates</i> spp., prior to taxonomic change adopted at CoP16.	Appendix II:Formerly included in <i>Epipedobates</i> spp.	Appendix II:Anteriormente incluida en <i>Epipedobates</i> spp.	Appendix II:Précédemment inscrit sous <i>Epipedobates</i> spp.		Appendix II:					true	PE	Peru	Peru
9808	Animalia	Chordata	Amphibia	Anura	Dendrobatidae	Ameerega	andina		Ameerega andina	(Myers & Burrowes, 1987)	SPECIES	II	Appendix II:Formerly included in <i>Epipedobates</i> spp., prior to taxonomic change adopted at CoP16.	Appendix II:Formerly included in <i>Epipedobates</i> spp.	Appendix II:Anteriormente incluida en <i>Epipedobates</i> spp.	Appendix II:Précédemment inscrit sous <i>Epipedobates</i> spp.		Appendix II:	Paruwrobates andinus Bauer, 1994, Ameerega andina Frost, Grant, Faivovich, Bain, Haas, Haddad, de Sá, Channing, Wilkinson, Donnellan, Raxworthy, Campbell, Blotto, Moler, Drewes, Nussbaum, Lynch, Green & Wheeler, 2006, Epipedobates andinus Myers & Burrowes, 1987, Dendrobates andinus (Myers & Burrowes, 1987)	La Planada Poison Frog	Rana de punta de flecha andino	Epipedobate andin	true	CO	Colombia	Colombia
4840	Animalia	Chordata	Amphibia	Anura	Dendrobatidae	Ameerega	bassleri		Ameerega bassleri	(Melin, 1941)	SPECIES	II	Appendix II:Formerly included in <i>Epipedobates</i> spp., prior to taxonomic change adopted at CoP16.	Appendix II:Formerly included in <i>Epipedobates</i> spp.	Appendix II:Anteriormente incluida en <i>Epipedobates</i> spp.	Appendix II:Précédemment inscrit sous <i>Epipedobates</i> spp.		Appendix II:	Phyllobates bassleri (Melin, 1941), Dendrobates bassleri Myers, Daly & Malkin, 1978, Dendrobates bassleri Melin, 1941, Phyllobates bassleri Silverstone, 1975, Epipedobates bassleri Myers, 1987, Epipedobates bassleri (Melin, 1941), Phobobates bassleri Zimmermann & Zimmermann, 1988, Ameerega bassleri Frost, Grant, Faivovich, Bain, Haas, Haddad, de Sá, Channing, Wilkinson, Donnellan, Raxworthy, Camp…	Pleasing Poison Frog	Rana de punta de flecha de Bassler, Rana venenosa	Dendrobate de Bassler, Phobobate de Bassler	true	PE	Peru	Peru
67947	Animalia	Chordata	Amphibia	Anura	Dendrobatidae	Ameerega	berohoka		Ameerega berohoka	Vaz-Silva & Maciel, 2011	SPECIES	II	Appendix II:Formerly included in <i>Epipedobates</i> spp., prior to taxonomic change adopted at CoP16.	Appendix II:Formerly included in <i>Epipedobates</i> spp.	Appendix II:Anteriormente incluida en <i>Epipedobates</i> spp.	Appendix II:Précédemment inscrit sous <i>Epipedobates</i> spp.		Appendix II:					true	BR	Brazil	Brazil
4492	Animalia	Chordata	Amphibia	Anura	Dendrobatidae	Ameerega	bilinguis		Ameerega bilinguis	(Jungfer, 1989)	SPECIES	II	Appendix II:Formerly included in <i>Epipedobates</i> spp., prior to taxonomic change adopted at CoP16.	Appendix II:Formerly included in <i>Epipedobates</i> spp.	Appendix II:Anteriormente incluida en <i>Epipedobates</i> spp.	Appendix II:Précédemment inscrit sous <i>Epipedobates</i> spp.		Appendix II:	Ameerega bilinguis Frost, Grant, Faivovich, Bain, Haas, Haddad, de Sá, Channing, Wilkinson, Donnellan, Raxworthy, Campbell, Blotto, Moler, Drewes, Nussbaum, Lynch, Green & Wheeler, 2006, Epipedobates bilinguis Jungfer, 1989	Ecuadorean Poison Frog, Ecuador Poison Frog			true	CO, EC	Colombia, Ecuador	Colombia, Ecuador
5684	Animalia	Chordata	Amphibia	Anura	Dendrobatidae	Ameerega	boehmei		Ameerega boehmei	Lötters, Schmitz, Reichle, Rödder & Quennet, 2009	SPECIES	II	Appendix II:Formerly included in <i>Epipedobates</i> spp., prior to taxonomic change adopted at CoP16.	Appendix II:Formerly included in <i>Epipedobates</i> spp.	Appendix II:Anteriormente incluida en <i>Epipedobates</i> spp.	Appendix II:Précédemment inscrit sous <i>Epipedobates</i> spp.		Appendix II:					true	BO	Bolivia (Plurinational State of)	Bolivia (Plurinational State of)
4158	Animalia	Chordata	Amphibia	Anura	Dendrobatidae	Ameerega	boliviana		Ameerega boliviana	(Boulenger, 1902)	SPECIES	II	Appendix II:Formerly included in <i>Epipedobates</i> spp., prior to taxonomic change adopted at CoP16.	Appendix II:Formerly included in <i>Epipedobates</i> spp.	Appendix II:Anteriormente incluida en <i>Epipedobates</i> spp.	Appendix II:Précédemment inscrit sous <i>Epipedobates</i> spp.		Appendix II:	Epipedobates bolivianus (Boulenger, 1902), Prostherapis bolivianus Boulenger, 1902, Dendrobates bolivianus (Boulenger, 1902), Colostethus bolivianus (Boulenger, 1902), Phyllobates bolivianus Barbour and Noble, 1920, Ameerega boliviana Frost, Grant, Faivovich, Bain, Haas, Haddad, de Sá, Channing, Wilkinson, Donnellan, Raxworthy, Campbell, Blotto, Moler, Drewes, Nussbaum, Lynch, Green & Wheeler, 20…	Bolivian Poison Frog	Rana de punta de flecha boliviana	Epipedobate bolivien, Epipedobate de Bolivie	true	BO	Bolivia (Plurinational State of)	Bolivia (Plurinational State of)
10457	Animalia	Chordata	Amphibia	Anura	Dendrobatidae	Ameerega	braccata		Ameerega braccata	(Steindachner, 1864)	SPECIES	II	Appendix II:Formerly included in <i>Epipedobates</i> spp., prior to taxonomic change adopted at CoP16.	Appendix II:Formerly included in <i>Epipedobates</i> spp.	Appendix II:Anteriormente incluida en <i>Epipedobates</i> spp.	Appendix II:Précédemment inscrit sous <i>Epipedobates</i> spp.		Appendix II:	Epipedobates braccatus (Steindachner, 1864), Ameerega braccata Frost, Grant, Faivovich, Bain, Haas, Haddad, de Sá, Channing, Wilkinson, Donnellan, Raxworthy, Campbell, Blotto, Moler, Drewes, Nussbaum, Lynch, Green & Wheeler, 2006, Dendrobates pictus braccatus (Tschudi, 1838), Dendrobates pictus braccatus Lutz, 1952, Dendrobates braccatus Cope, 1887, Epipedobates braccatus Martins & Sazima, 1989, …				true	BO, BR, PY	Bolivia (Plurinational State of), Brazil, Paraguay	Brazil						Bolivia (Plurinational State of), Paraguay
9190	Animalia	Chordata	Amphibia	Anura	Dendrobatidae	Ameerega	cainarachi		Ameerega cainarachi	(Schulte, 1989)	SPECIES	II	Appendix II:Formerly included in <i>Epipedobates</i> spp., prior to taxonomic change adopted at CoP16.	Appendix II:Formerly included in <i>Epipedobates</i> spp.	Appendix II:Anteriormente incluida en <i>Epipedobates</i> spp.	Appendix II:Précédemment inscrit sous <i>Epipedobates</i> spp.		Appendix II:	Ameerega cainarachi Frost, Grant, Faivovich, Bain, Haas, Haddad, de Sá, Channing, Wilkinson, Donnellan, Raxworthy, Campbell, Blotto, Moler, Drewes, Nussbaum, Lynch, Green & Wheeler, 2006, Epipedobates cainarachi Schulte, 1989, Epipedobates ardens Jungfer, 1989	Cainarachi poison frog	Rana venenosa		true	PE	Peru	Peru
10416	Animalia	Chordata	Amphibia	Anura	Dendrobatidae	Ameerega	erythromos		Ameerega erythromos	(Vigle & Miyata, 1980)	SPECIES	II	Appendix II:Formerly included in <i>Epipedobates</i> spp., prior to taxonomic change adopted at CoP16.	Appendix II:Formerly included in <i>Epipedobates</i> spp.	Appendix II:Anteriormente incluida en <i>Epipedobates</i> spp.	Appendix II:Précédemment inscrit sous <i>Epipedobates</i> spp.		Appendix II:	Phyllobates (pseudendrobates) erythromos Bauer, 1988, Epipedobates erythromos (Vigle & Miyata, 1980), Epipedobates erythromos Myers, 1987, Dendrobates erythromos Vigle & Miyata, 1980, Ameerega erythromos Frost, Grant, Faivovich, Bain, Haas, Haddad, de Sá, Channing, Wilkinson, Donnellan, Raxworthy, Campbell, Blotto, Moler, Drewes, Nussbaum, Lynch, Green & Wheeler, 2006	Palenque Poison Frog		Epipedobate du Rio Palenque	true	EC	Ecuador	Ecuador
5050	Animalia	Chordata	Amphibia	Anura	Dendrobatidae	Ameerega	flavopicta		Ameerega flavopicta	(A. Lutz, 1925)	SPECIES	II	Appendix II:Formerly included in <i>Epipedobates</i> spp., prior to taxonomic change adopted at CoP16.	Appendix II:Formerly included in <i>Epipedobates</i> spp.	Appendix II:Anteriormente incluida en <i>Epipedobates</i> spp.	Appendix II:Précédemment inscrit sous <i>Epipedobates</i> spp.		Appendix II:	Dendrobates pictus flavopictus (Tschudi, 1838), Dendrobates flavopictus (A. Lutz, 1925), Hylaplesia flavopicta Lutz, 1925, Ameerega flavopicta Frost, Grant, Faivovich, Bain, Haas, Haddad, de Sá, Channing, Wilkinson, Donnellan, Raxworthy, Campbell, Blotto, Moler, Drewes, Nussbaum, Lynch, Green & Wheeler, 2006, Dendrobates pictus flavopictus Lutz, 1952, Epipedobates flavopictus Myers, 1987, Dendrob…	Lutz's poison frog			true	BR	Brazil	Brazil
5651	Animalia	Chordata	Amphibia	Anura	Dendrobatidae	Ameerega	hahneli		Ameerega hahneli	(Boulenger, 1884)	SPECIES	II	Appendix II:Formerly included in <i>Epipedobates</i> spp., prior to taxonomic change adopted at CoP16.	Appendix II:Formerly included in <i>Epipedobates</i> spp.	Appendix II:Anteriormente incluida en <i>Epipedobates</i> spp.	Appendix II:Précédemment inscrit sous <i>Epipedobates</i> spp.		Appendix II:	Epipedobates hahneli (Boulenger, 1883), Dendrobates hahneli Boulenger, 1884, Dendrobates pictus hahneli Lutz, 1952, Dendrobates pictus hahneli (Tschudi, 1838), Ameerega hahneli Frost, Grant, Faivovich, Bain, Haas, Haddad, de Sá, Channing, Wilkinson, Donnellan, Raxworthy, Campbell, Blotto, Moler, Drewes, Nussbaum, Lynch, Green & Wheeler, 2006, Epipedobates hahneli hahneli Schulte, 1999, Epipedobat…				true	BO, BR, CO, EC, GF, GY, PE, SR, VE	Bolivia (Plurinational State of), Brazil, Colombia, Ecuador, French Guiana [FR], Guyana, Peru, Suriname, Venezuela (Bolivarian Republic of)	Bolivia (Plurinational State of), Brazil, Colombia, Ecuador, French Guiana [FR], Peru, Venezuela (Bolivarian Republic of)						Guyana, Suriname
5654	Animalia	Chordata	Amphibia	Anura	Dendrobatidae	Ameerega	ignipedis		Ameerega ignipedis	Brown & Twomey, 2009	SPECIES	II	Appendix II:Formerly included in <i>Epipedobates</i> spp., prior to taxonomic change adopted at CoP16.	Appendix II:Formerly included in <i>Epipedobates</i> spp.	Appendix II:Anteriormente incluida en <i>Epipedobates</i> spp.	Appendix II:Précédemment inscrit sous <i>Epipedobates</i> spp.		Appendix II:					true	PE	Peru	Peru
9404	Animalia	Chordata	Amphibia	Anura	Dendrobatidae	Ameerega	ingeri		Ameerega ingeri	(Cochran & Goin, 1970)	SPECIES	II	Appendix II:Formerly included in <i>Epipedobates</i> spp., prior to taxonomic change adopted at CoP16.	Appendix II:Formerly included in <i>Epipedobates</i> spp.	Appendix II:Anteriormente incluida en <i>Epipedobates</i> spp.	Appendix II:Précédemment inscrit sous <i>Epipedobates</i> spp.		Appendix II:	Epipedobates ingeri (Cochran & Goin, 1970), Epipedobates ingeri Myers, 1987, Ameerega ingeri Frost, Grant, Faivovich, Bain, Haas, Haddad, de Sá, Channing, Wilkinson, Donnellan, Raxworthy, Campbell, Blotto, Moler, Drewes, Nussbaum, Lynch, Green & Wheeler, 2006, Phyllobates ingeri Silverstone, 1975, Phyllobates ingeri (Cochran & Goin, 1970), Phyllobates (pseudendrobates) ingeri Bauer, 1988, Dendrob…	Brother niceforo's poison-arrow frog, Niceforo's Poison Frog	Rana de punta de flecha de Inger	Epipedobate d'Inger	true	CO	Colombia	Colombia
4839	Animalia	Chordata	Amphibia	Anura	Dendrobatidae	Ameerega	labialis		Ameerega labialis	(Cope, 1874)	SPECIES	II	Appendix II:Formerly included in <i>Epipedobates</i> spp., prior to taxonomic change adopted at CoP16.	Appendix II:Formerly included in <i>Epipedobates</i> spp.	Appendix II:Anteriormente incluida en <i>Epipedobates</i> spp.	Appendix II:Précédemment inscrit sous <i>Epipedobates</i> spp.		Appendix II:	Dendrobates labialis Cope, 1874, Ameerega labialis Frost, Grant, Faivovich, Bain, Haas, Haddad, de Sá, Channing, Wilkinson, Donnellan, Raxworthy, Campbell, Blotto, Moler, Drewes, Nussbaum, Lynch, Green & Wheeler, 2006, Hylaplesia labialis Knauer, 1883, Epipedobates labialis Schulte, 1999, Hylaplesia labialis (Cope, 1874), Epipedobates labialis (Cope, 1874)		Rana venenosa	Dendrobate labié	true	PE	Peru	Peru
5968	Animalia	Chordata	Amphibia	Anura	Dendrobatidae	Ameerega	macero		Ameerega macero	Rodríguez & Myers, 1993	SPECIES	II	Appendix II:Formerly included in <i>Epipedobates</i> spp., prior to taxonomic change adopted at CoP16.	Appendix II:Formerly included in <i>Epipedobates</i> spp.	Appendix II:Anteriormente incluida en <i>Epipedobates</i> spp.	Appendix II:Précédemment inscrit sous <i>Epipedobates</i> spp.		Appendix II:	Ameerega macero Frost, Grant, Faivovich, Bain, Haas, Haddad, de Sá, Channing, Wilkinson, Donnellan, Raxworthy, Campbell, Blotto, Moler, Drewes, Nussbaum, Lynch, Green & Wheeler, 2006, Epipedobates macero Rodríguez & Myers, 1993	Manu Poison Frog	Rana venenosa		true	PE	Peru	Peru
9023	Animalia	Chordata	Amphibia	Anura	Dendrobatidae	Ameerega	maculata		Ameerega maculata	(W. Peters, 1873)	SPECIES	II	Appendix II:Formerly included in <i>Epipedobates</i> spp., prior to taxonomic change adopted at CoP16.	Appendix II:Formerly included in <i>Epipedobates</i> spp.	Appendix II:Anteriormente incluida en <i>Epipedobates</i> spp.	Appendix II:Précédemment inscrit sous <i>Epipedobates</i> spp.		Appendix II:	Epipedobates maculatus Myers, 1987, Dendrobates trivittatus var. maculata Peters, 1873, Dendrobates maculatus Myers, 1982, Ameerega maculata Grant, Frost, Caldwell, Gagliardo, Haddad, Kok, Means, Noonan, Schargel & Wheeler, 2006, Epipedobates maculatus (W. Peters, 1873), Dendrobates maculatus W. Peters, 1873, Dendrobates trivittatus maculatus (Spix, 1824)	Confusing Poison Frog	Rana de punta de flecha maculada	Epipedobate tacheté	true	PA	Panama	Panama
6462	Animalia	Chordata	Amphibia	Anura	Dendrobatidae	Ameerega	parvula		Ameerega parvula	(Boulenger, 1882)	SPECIES	II	Appendix II:Formerly included in <i>Epipedobates</i> spp., prior to taxonomic change adopted at CoP16.	Appendix II:Formerly included in <i>Epipedobates</i> spp.	Appendix II:Anteriormente incluida en <i>Epipedobates</i> spp.	Appendix II:Précédemment inscrit sous <i>Epipedobates</i> spp.		Appendix II:	Dendrobates parvulus Myers, Daly & Malkin, 1978, Dendrobates parvulus Boulenger, 1882, Ameerega parvula Frost, Grant, Faivovich, Bain, Haas, Haddad, de Sá, Channing, Wilkinson, Donnellan, Raxworthy, Campbell, Blotto, Moler, Drewes, Nussbaum, Lynch, Green & Wheeler, 2006, Phyllobates (pseudendrobates) parvulus Bauer, 1988, Epipedobates parvulus Myers, 1987, Phyllobates festae (Peracca, 1904), Phyl…	Ruby Poison Frog	Rana venenosa	Epipedobate minime	true	CO, EC, PE	Colombia, Ecuador, Peru	Colombia, Ecuador, Peru
10918	Animalia	Chordata	Amphibia	Anura	Dendrobatidae	Ameerega	pepperi		Ameerega pepperi	Brown & Twomey, 2009	SPECIES	II	Appendix II:Formerly included in <i>Epipedobates</i> spp., prior to taxonomic change adopted at CoP16.	Appendix II:Formerly included in <i>Epipedobates</i> spp.	Appendix II:Anteriormente incluida en <i>Epipedobates</i> spp.	Appendix II:Précédemment inscrit sous <i>Epipedobates</i> spp.		Appendix II:					true	PE	Peru	Peru
4648	Animalia	Chordata	Amphibia	Anura	Dendrobatidae	Ameerega	peruviridis		Ameerega peruviridis	Bauer, 1986	SPECIES	II	Appendix II:Formerly included in <i>Epipedobates</i> spp., prior to taxonomic change adopted at CoP16.	Appendix II:Formerly included in <i>Epipedobates</i> spp.	Appendix II:Anteriormente incluida en <i>Epipedobates</i> spp.	Appendix II:Précédemment inscrit sous <i>Epipedobates</i> spp.		Appendix II:	Epipedobates epipedobates trivittatus (Spix, 1824)				true	PE	Peru	Peru
5728	Animalia	Chordata	Amphibia	Anura	Dendrobatidae	Ameerega	petersi		Ameerega petersi	(Silverstone, 1976)	SPECIES	II	Appendix II:Formerly included in <i>Epipedobates</i> spp., prior to taxonomic change adopted at CoP16.	Appendix II:Formerly included in <i>Epipedobates</i> spp.	Appendix II:Anteriormente incluida en <i>Epipedobates</i> spp.	Appendix II:Précédemment inscrit sous <i>Epipedobates</i> spp.		Appendix II:	Epipedobates petersi Myers, 1987, Epipedobates petersi (Silverstone, 1976), Dendrobates petersi (Silverstone, 1976), Ameerega petersi Frost, Grant, Faivovich, Bain, Haas, Haddad, de Sá, Channing, Wilkinson, Donnellan, Raxworthy, Campbell, Blotto, Moler, Drewes, Nussbaum, Lynch, Green & Wheeler, 2006, Phyllobates (pseudendrobates) petersi Bauer, 1988, Dendrobates petersi Myers, Daly & Malkin, 1978…	Peru poison frog, Peruvian Poison Frog	Rana de punta de flecha de Peters, Rana venenosa	Epipedobate de Peters	true	BR, PE	Brazil, Peru	Brazil, Peru
10462	Animalia	Chordata	Amphibia	Anura	Dendrobatidae	Ameerega	picta		Ameerega picta	(Tschudi, 1838)	SPECIES	II	Appendix II:Formerly included in <i>Epipedobates</i> spp., prior to taxonomic change adopted at CoP16.	Appendix II:Formerly included in <i>Epipedobates</i> spp.	Appendix II:Anteriormente incluida en <i>Epipedobates</i> spp.	Appendix II:Précédemment inscrit sous <i>Epipedobates</i> spp.		Appendix II:	Dendrobates pictus pictus Lutz, 1952, Hylaplesia picta Bibron In Tschudi, 1838, Phyllobates pictus (Tschudi, 1838), Dendrobates pictus Myers, Daly & Malkin, 1978, Epipedobates pictus (Tschudi, 1838), Ameerega picta Frost, Grant, Faivovich, Bain, Haas, Haddad, de Sá, Channing, Wilkinson, Donnellan, Raxworthy, Campbell, Blotto, Moler, Drewes, Nussbaum, Lynch, Green & Wheeler, 2006, Dendrobates pict…	Spot-legged poison-arrow frog, Spot-legged Poison Frog	Rana de punta de flecha picta, Sapito pintado	Epipedobate peint	true	BO, BR, CO, PY, PE, VE	Bolivia (Plurinational State of), Brazil, Colombia, Paraguay, Peru, Venezuela (Bolivarian Republic of)	Bolivia (Plurinational State of), Brazil, Colombia, Peru, Venezuela (Bolivarian Republic of)						Paraguay
4732	Animalia	Chordata	Amphibia	Anura	Dendrobatidae	Ameerega	planipaleae		Ameerega planipaleae	(Morales & Velazco, 1998)	SPECIES	II	Appendix II:Formerly included in <i>Epipedobates</i> spp., prior to taxonomic change adopted at CoP16.	Appendix II:Formerly included in <i>Epipedobates</i> spp.	Appendix II:Anteriormente incluida en <i>Epipedobates</i> spp.	Appendix II:Précédemment inscrit sous <i>Epipedobates</i> spp.		Appendix II:	Ameerega planipaleae Frost, Grant, Faivovich, Bain, Haas, Haddad, de Sá, Channing, Wilkinson, Donnellan, Raxworthy, Campbell, Blotto, Moler, Drewes, Nussbaum, Lynch, Green & Wheeler, 2006,, Epipedobates planipaleae Morales & Velazco, 1998	Oxapampa poison frog	Rana venenosa		true	PE	Peru	Peru
10094	Animalia	Chordata	Amphibia	Anura	Dendrobatidae	Ameerega	pongoensis		Ameerega pongoensis	(Schulte, 1999)	SPECIES	II	Appendix II:Formerly included in <i>Epipedobates</i> spp., prior to taxonomic change adopted at CoP16.	Appendix II:Formerly included in <i>Epipedobates</i> spp.	Appendix II:Anteriormente incluida en <i>Epipedobates</i> spp.	Appendix II:Précédemment inscrit sous <i>Epipedobates</i> spp.		Appendix II:	Ameerega pongoensis Frost, Grant, Faivovich, Bain, Haas, Haddad, de Sá, Channing, Wilkinson, Donnellan, Raxworthy, Campbell, Blotto, Moler, Drewes, Nussbaum, Lynch, Green & Wheeler, 2006, Epipedobates pongoensis Schulte, 1999				true	PE	Peru	Peru
8162	Animalia	Chordata	Amphibia	Anura	Dendrobatidae	Ameerega	pulchripecta		Ameerega pulchripecta	(Silverstone, 1976)	SPECIES	II	Appendix II:Formerly included in <i>Epipedobates</i> spp., prior to taxonomic change adopted at CoP16.	Appendix II:Formerly included in <i>Epipedobates</i> spp.	Appendix II:Anteriormente incluida en <i>Epipedobates</i> spp.	Appendix II:Précédemment inscrit sous <i>Epipedobates</i> spp.		Appendix II:	Epipedobates pulchripectus Myers, 1987, Phyllobates pulchripectus Silverstone, 1976, Dendrobates pulchripectus Myers, Daly, and Malkin, 1978, Dendrobates pulchripectus (Silverstone, 1976), Ameerega pulchripecta Frost, Grant, Faivovich, Bain, Haas, Haddad, de Sá, Channing, Wilkinson, Donnellan, Raxworthy, Campbell, Blotto, Moler, Drewes, Nussbaum, Lynch, Green & Wheeler, 2006, Epipedobates pulchri…	Beautiful-breasted Poison Frog, Blue-breasted Poison Frog, Silverstone’s Poison Frog		Epipedobate calisterne	true	BR	Brazil	Brazil
8578	Animalia	Chordata	Amphibia	Anura	Dendrobatidae	Ameerega	rubriventris		Ameerega rubriventris	(Lötters, Debold, Henle, Glaw & Kneller, 1997)	SPECIES	II	Appendix II:Formerly included in <i>Epipedobates</i> spp., prior to taxonomic change adopted at CoP16.	Appendix II:Formerly included in <i>Epipedobates</i> spp.	Appendix II:Anteriormente incluida en <i>Epipedobates</i> spp.	Appendix II:Précédemment inscrit sous <i>Epipedobates</i> spp.		Appendix II:	Ameerega hahneli rubriventris (Boulenger, 1884), Epipedobates hahneli rubriventris Schulte, 1999, Epipedobates rubriventris Lötters, Debold, Henle, Glaw & Kneller, 1997, Ameerega rubriventris Frost, Grant, Faivovich, Bain, Haas, Haddad, de Sá, Channing, Wilkinson, Donnellan, Raxworthy, Campbell, Blotto, Moler, Drewes, Nussbaum, Lynch, Green & Wheeler, 2006		Rana venenosa		true	PE	Peru	Peru
5972	Animalia	Chordata	Amphibia	Anura	Dendrobatidae	Ameerega	silverstonei		Ameerega silverstonei	(Myers & Daly, 1979)	SPECIES	II	Appendix II:Formerly included in <i>Epipedobates</i> spp., prior to taxonomic change adopted at CoP16.	Appendix II:Formerly included in <i>Epipedobates</i> spp.	Appendix II:Anteriormente incluida en <i>Epipedobates</i> spp.	Appendix II:Précédemment inscrit sous <i>Epipedobates</i> spp.		Appendix II:	Epipedobates silverstonei (Myers & Daly, 1979), Phyllobates (pseudendrobates) silverstonei Bauer, 1988, Ameerega silverstonei Frost, Grant, Faivovich, Bain, Haas, Haddad, de Sá, Channing, Wilkinson, Donnellan, Raxworthy, Campbell, Blotto, Moler, Drewes, Nussbaum, Lynch, Green & Wheeler, 2006, Phobobates silverstonei (Myers & Daly, 1979), Phobobates silverstonei Zimmermann & Zimmermann, 1988, Epip…	Silverstone's Poison Frog	Rana de punta de flecha de Silverstone, Rana venenosa	Dendrobate de Silverstone, Phobobate de Silverstone	true	PE	Peru	Peru
7084	Animalia	Chordata	Amphibia	Anura	Dendrobatidae	Ameerega	simulans		Ameerega simulans	(Myers, Rodriguez & Icochea, 1998)	SPECIES	II	Appendix II:Formerly included in <i>Epipedobates</i> spp., prior to taxonomic change adopted at CoP16.	Appendix II:Formerly included in <i>Epipedobates</i> spp.	Appendix II:Anteriormente incluida en <i>Epipedobates</i> spp.	Appendix II:Précédemment inscrit sous <i>Epipedobates</i> spp.		Appendix II:	Epipedobates simulans Myers, Rodríguez & Icochea, 2000, Ameerega simulans Frost, Grant, Faivovich, Bain, Haas, Haddad, de Sá, Channing, Wilkinson, Donnellan, Raxworthy, Campbell, Blotto, Moler, Drewes, Nussbaum, Lynch, Green & Wheeler, 2006		Rana venenosa		true	PE	Peru	Peru
9239	Animalia	Chordata	Amphibia	Anura	Dendrobatidae	Ameerega	smaragdina		Ameerega smaragdina	(Silverstone, 1976)	SPECIES	II	Appendix II:Formerly included in <i>Epipedobates</i> spp., prior to taxonomic change adopted at CoP16.	Appendix II:Formerly included in <i>Epipedobates</i> spp.	Appendix II:Anteriormente incluida en <i>Epipedobates</i> spp.	Appendix II:Précédemment inscrit sous <i>Epipedobates</i> spp.		Appendix II:	Dendrobates smaragdinus Myers, Daly & Malkin, 1978, Dendrobates smaragdinus (Silverstone, 1976), Epipedobates smaragdinus (Silverstone, 1976), Phyllobates smaragdinus Silverstone, 1976, Epipedobates smaragdinus Myers, 1987, Phyllobates (pseudendrobates) smaragdina Bauer, 1988, Ameerega smaragdina Frost, Grant, Faivovich, Bain, Haas, Haddad, de Sá, Channing, Wilkinson, Donnellan, Raxworthy, Campbe…	Emerald poison-arrow frog, Emerald Poison Frog	Rana de punta de flecha esmeralda, Rana venenosa	Epipedobate émeraude	true	PE	Peru	Peru
6078	Animalia	Chordata	Amphibia	Anura	Dendrobatidae	Ameerega	trivittata		Ameerega trivittata	(Spix, 1824)	SPECIES	II	Appendix II:Formerly included in <i>Epipedobates</i> spp., prior to taxonomic change adopted at CoP16.	Appendix II:Formerly included in <i>Epipedobates</i> spp.	Appendix II:Anteriormente incluida en <i>Epipedobates</i> spp.	Appendix II:Précédemment inscrit sous <i>Epipedobates</i> spp.		Appendix II:	Ameerega trivittata Frost, Grant, Faivovich, Bain, Haas, Haddad, de Sá, Channing, Wilkinson, Donnellan, Raxworthy, Campbell, Blotto, Moler, Drewes, Nussbaum, Lynch, Green & Wheeler, 2006, Hylaplesia trivittata (Spix, 1824), Phobobates trivittatus (Spix, 1824), Hyla trivittata Spix, 1824, Dendrobates tetravittatus Miranda-Ribeiro, 1926, Dendrobates nigerrimus (Spix, 1824), Dendrobates trivittatus …	Three-striped arrow-poison frog, Three-striped Poison Frog	Sapito dardo trilistado	Dendrobate à trois bandes, Phobobate à trois bandes	true	BO, BR, CO, EC, GY, PE, SR, VE	Bolivia (Plurinational State of), Brazil, Colombia, Ecuador, Guyana, Peru, Suriname, Venezuela (Bolivarian Republic of)	Bolivia (Plurinational State of), Brazil, Colombia, Ecuador, Guyana, Peru, Suriname, Venezuela (Bolivarian Republic of)
10619	Animalia	Chordata	Amphibia	Anura	Dendrobatidae	Ameerega	yoshina		Ameerega yoshina	Brown & Twomey, 2009	SPECIES	II	Appendix II:Formerly included in <i>Epipedobates</i> spp., prior to taxonomic change adopted at CoP16.	Appendix II:Formerly included in <i>Epipedobates</i> spp.	Appendix II:Anteriormente incluida en <i>Epipedobates</i> spp.	Appendix II:Précédemment inscrit sous <i>Epipedobates</i> spp.		Appendix II:					true	PE	Peru	Peru
3814	Animalia	Chordata	Amphibia	Anura	Dendrobatidae	Ameerega	yungicola		Ameerega yungicola	(Lötters, Schmitz & Reichle, 2006)	SPECIES	II	Appendix II:Formerly included in <i>Epipedobates</i> spp., prior to taxonomic change adopted at CoP16.	Appendix II:Formerly included in <i>Epipedobates</i> spp.	Appendix II:Anteriormente incluida en <i>Epipedobates</i> spp.	Appendix II:Précédemment inscrit sous <i>Epipedobates</i> spp.		Appendix II:	Epipedobates epipedobates yungicola Lötters, Schmitz & Reichle, 2005, Ameerega yungicola Frost, 2006				true	BO	Bolivia (Plurinational State of)	Bolivia (Plurinational State of)
68382	Animalia	Chordata	Amphibia	Anura	Bufonidae	Amietophrynus	channingi		Amietophrynus channingi	Barej, Schmitz, Menegon, Hillers, Hinkel, Böhme & Rödel, 2011	SPECIES	I	Appendix I:Formerly listed under synonym <i>Bufo superciliaris</i>, prior to taxonomic change adopted at CoP16. <p>Originally listed as <i>Amietophrynus superciliaris</i>, from which <i>Amietophrynus channingi</i> was split in 2017, following taxonomic changes adopted at CoP17.</p>	Appendix I:Formerly listed under synonym <i>Bufo superciliaris</i>. <p>Originally listed as <i>Amietophrynus superciliaris</i>, from which <i>Amietophrynus channingi</i> was split in 2017, following taxonomic changes adopted at CoP17.</p>	Appendix I:Anteriormente incluida como el sinónimo <i>Bufo superciliaris</i>. <p>Originally listed as <i>Amietophrynus superciliaris</i>, from which <i>Amietophrynus channingi</i> was split in 2017, following taxonomic changes adopted at CoP17.</p>	Appendix I:Précédemment inscrit comme le synonyme <i>Bufo superciliaris</i>. <p>Originally listed as <i>Amietophrynus superciliaris</i>, from which <i>Amietophrynus channingi</i> was split in 2017, following taxonomic changes adopted at CoP17.</p>		Appendix I: <p>Originally listed as <i>Amietophrynus superciliaris</i>, from which <i>Amietophrynus channingi</i> was split in 2017, following taxonomic changes adopted at CoP17.</p>		Cameroon Toad, Zaire Toad	Sapo del Camerún	Crapaud du Cameroun	true	BI, CD, RW, UG	Burundi, Democratic Republic of the Congo, Rwanda, Uganda	Democratic Republic of the Congo						Burundi, Rwanda, Uganda
6093	Animalia	Chordata	Amphibia	Anura	Bufonidae	Amietophrynus	superciliaris		Amietophrynus superciliaris	(Boulenger, 1888)	SPECIES	I	Appendix I:Formerly listed under synonym <i>Bufo superciliaris</i>, prior to taxonomic change adopted at CoP16.	Appendix I:Formerly listed under synonym <i>Bufo superciliaris</i>.	Appendix I:Anteriormente incluida como el sinónimo <i>Bufo superciliaris</i>.	Appendix I:Précédemment inscrit comme le synonyme <i>Bufo superciliaris</i>.		Appendix I:	Bufo superciliaris Boulenger, 1888 "1887", Bufo laevissimus Werner, 1897, Bufo chevalieri Mocquard, 1908, Bufo superciliosus Werner, 1897, Amietophrynus superciliaris Frost, Grant, Faivovich, Bain, Haas, Haddad, de Sá, Channing, Wilkinson, Donnellan, Raxworthy, Campbell, Blotto, Moler, Drewes, Nussbaum, Lynch, Green & Wheeler, 2006	Cameroon Toad, Zaire Toad	Sapo del Camerún	Crapaud du Cameroun	true	BJ, CM, CF, CG, CI, GQ, GA, GH, GN, LR, NG	Benin, Cameroon, Central African Republic, Congo, Côte d'Ivoire, Equatorial Guinea, Gabon, Ghana, Guinea, Liberia, Nigeria	Cameroon, Central African Republic, Congo, Côte d'Ivoire, Equatorial Guinea, Gabon, Guinea, Liberia, Nigeria						Benin, Ghana
1934	Animalia	Chordata	Amphibia	Anura	Dendrobatidae	Andinobates			Andinobates		GENUS	II	Appendix II:Formerly included in <i>Dendrobates</i> spp., prior to taxonomic change adopted at CoP16.	Appendix II:Formerly included in <i>Dendrobates</i> spp.	Appendix II:Anteriormente incluida en <i>Dendrobates</i> spp.	Appendix II:Précédemment inscrit sous <i>Dendrobates</i> spp.		Appendix II:					true
4231	Animalia	Chordata	Amphibia	Anura	Dendrobatidae	Andinobates	abditus		Andinobates abditus	(Myers & Daly, 1976)	SPECIES	II	Appendix II:Formerly included in <i>Dendrobates</i> spp., prior to taxonomic change adopted at CoP16.	Appendix II:Formerly included in <i>Dendrobates</i> spp.	Appendix II:Anteriormente incluida en <i>Dendrobates</i> spp.	Appendix II:Précédemment inscrit sous <i>Dendrobates</i> spp.		Appendix II:	Ranitomeya abdita Grant, Frost, Caldwell, Gagliardo, Haddad, Kok, Means, Noonan, Schargel & Wheeler, 2006, Dendrobates abditus Jungfer, Lötters & Jörgens, 2000, Andinobates abditus Brown, Twomey, Amézquita, Barbosa de Souza, Caldwell, Lötters, von May, Melo-Sampaio, Mejía-Vargas, Perez-Peña, Pepper, Sanchez-Rodriguez & Summers, 2011, Minyobates abditus (Myers & Daly, 1976), Minyobates abditus Mye…	Collins' poison frog, Collins's Poison Frog		Minyobate secret	true	EC	Ecuador	Ecuador
7728	Animalia	Chordata	Amphibia	Anura	Dendrobatidae	Andinobates	altobueyensis		Andinobates altobueyensis	(Silverstone, 1975)	SPECIES	II	Appendix II:Formerly included in <i>Dendrobates</i> spp., prior to taxonomic change adopted at CoP16.	Appendix II:Formerly included in <i>Dendrobates</i> spp.	Appendix II:Anteriormente incluida en <i>Dendrobates</i> spp.	Appendix II:Précédemment inscrit sous <i>Dendrobates</i> spp.		Appendix II:	Dendrobates altobueyensis Silverstone, 1975, Dendrobates dendrobates altobueyensis Silverstone, 1975, Dendrobates altobueyensis Jungfer, Lötters & Jörgens, 2000, Andinobates altobueyensis Brown, Twomey, Amézquita, Barbosa de Souza, Caldwell, Lötters, von May, Melo-Sampaio, Mejía-Vargas, Perez-Peña, Pepper, Sanchez-Rodriguez & Summers, 2011, Ranitomeya ranitomeya altobueyensis Grant, Frost, Caldwe…	Alto de Buey Poison Frog, Golden poison-arrow frog, Golden Poison Frog		Minyobate d'Alto del Buey	true	CO	Colombia	Colombia
3613	Animalia	Chordata	Amphibia	Anura	Dendrobatidae	Andinobates	bombetes		Andinobates bombetes	(Myers & Daly, 1980)	SPECIES	II	Appendix II:Formerly included in <i>Dendrobates</i> spp., prior to taxonomic change adopted at CoP16.	Appendix II:Formerly included in <i>Dendrobates</i> spp.	Appendix II:Anteriormente incluida en <i>Dendrobates</i> spp.	Appendix II:Précédemment inscrit sous <i>Dendrobates</i> spp.		Appendix II:	Minyobates bombetes Myers, 1987, Dendrobates bombetes Myers & Daly, 1980, Minyobates bombetes (Myers & Daly, 1980), Ranitomeya bombetes (Myers & Daly, 1980), Andinobates bombetes Brown, Twomey, Amézquita, Barbosa de Souza, Caldwell, Lötters, von May, Melo-Sampaio, Mejía-Vargas, Perez-Peña, Pepper, Sanchez-Rodriguez & Summers, 2011, Ranitomeya bombetes Grant, Frost, Caldwell, Gagliardo, Haddad, Ko…	Cauca Poison Frog		Minyobate bourdonnant	true	CO	Colombia	Colombia
67948	Animalia	Chordata	Amphibia	Anura	Dendrobatidae	Andinobates	cassidyhornae		Andinobates cassidyhornae	Amézquita, Márquez, Mejía-Vargas, Kahn, Suárez, & Mazariegos, 2013	SPECIES	II	Appendix II:Formerly included in <i>Dendrobates</i> spp., prior to taxonomic change adopted at CoP16.	Appendix II:Formerly included in <i>Dendrobates</i> spp.	Appendix II:Anteriormente incluida en <i>Dendrobates</i> spp.	Appendix II:Précédemment inscrit sous <i>Dendrobates</i> spp.		Appendix II:					true	CO	Colombia	Colombia
9053	Animalia	Chordata	Amphibia	Anura	Dendrobatidae	Andinobates	claudiae		Andinobates claudiae	(Jungfer, Lötters & Jörgens, 2000)	SPECIES	II	Appendix II:Formerly included in <i>Dendrobates</i> spp., prior to taxonomic change adopted at CoP16.	Appendix II:Formerly included in <i>Dendrobates</i> spp.	Appendix II:Anteriormente incluida en <i>Dendrobates</i> spp.	Appendix II:Précédemment inscrit sous <i>Dendrobates</i> spp.		Appendix II:	Dendrobates mimulus Burton, 1998, Ranitomeya claudiae Grant, Frost, Caldwell, Gagliardo, Haddad, Kok, Means, Noonan, Schargel & Wheeler, 2006, Andinobates claudiae Brown, Twomey, Amézquita, Barbosa de Souza, Caldwell, Lötters, von May, Melo-Sampaio, Mejía-Vargas, Perez-Peña, Pepper, Sanchez-Rodriguez & Summers, 2011, Dendrobates claudiae (Jungfer, Lötters & Jörgens, 2000), Ranitomeya claudiae (Ju…				true	PA	Panama	Panama
6456	Animalia	Chordata	Amphibia	Anura	Dendrobatidae	Andinobates	daleswansoni		Andinobates daleswansoni	(Rueda-Almonacid, Rada, Sánchez-Pacheco, et al., 2006)	SPECIES	II	Appendix II:Formerly included in <i>Dendrobates</i> spp., prior to taxonomic change adopted at CoP16.	Appendix II:Formerly included in <i>Dendrobates</i> spp.	Appendix II:Anteriormente incluida en <i>Dendrobates</i> spp.	Appendix II:Précédemment inscrit sous <i>Dendrobates</i> spp.		Appendix II:	Ranitomeya daleswansoni (Rueda-Almonacid, Rada, Sánchez-Pacheco, et al., 2006), Andinobates daleswansoni Brown, Twomey, Amézquita, Barbosa de Souza, Caldwell, Lötters, von May, Melo-Sampaio, Mejía-Vargas, Perez-Peña, Pepper, Sanchez-Rodriguez & Summers, 2011, Ranitomeya daleswansoni Frost, 2007, Dendrobates dendrobates daleswansoni Rueda-Almonacid, Rada, Sánchez-Pacheco, Velásquez-Álvarez & Queve…				true	CO	Colombia	Colombia
9014	Animalia	Chordata	Amphibia	Anura	Dendrobatidae	Andinobates	dorisswansonae		Andinobates dorisswansonae	(Rueda-Almonacid, Rada, Sánchez-Pacheco, et al., 2006)	SPECIES	II	Appendix II:Formerly included in <i>Dendrobates</i> spp., prior to taxonomic change adopted at CoP16.	Appendix II:Formerly included in <i>Dendrobates</i> spp.	Appendix II:Anteriormente incluida en <i>Dendrobates</i> spp.	Appendix II:Précédemment inscrit sous <i>Dendrobates</i> spp.		Appendix II:	Ranitomeya dorisswansoni (Rueda-Almonacid, Rada, Sánchez-Pacheco, et al., 2006), Andinobates dorisswansonae Brown, Twomey, Amézquita, Barbosa de Souza, Caldwell, Lötters, von May, Melo-Sampaio, Mejía-Vargas, Perez-Peña, Pepper, Sanchez-Rodriguez & Summers, 2011, Ranitomeya dorisswansoni Frost, 2007, Dendrobates dendrobates dorisswansonae Rueda-Almonacid, Rada, Sánchez-Pacheco, Velásquez-Álvarez &…				true	CO	Colombia	Colombia
4063	Animalia	Chordata	Amphibia	Anura	Dendrobatidae	Andinobates	fulguritus		Andinobates fulguritus	(Silverstone, 1975)	SPECIES	II	Appendix II:Formerly included in <i>Dendrobates</i> spp., prior to taxonomic change adopted at CoP16.	Appendix II:Formerly included in <i>Dendrobates</i> spp.	Appendix II:Anteriormente incluida en <i>Dendrobates</i> spp.	Appendix II:Précédemment inscrit sous <i>Dendrobates</i> spp.		Appendix II:	Minyobates fulguritus (Silverstone, 1975), Ranitomeya fulgurita Grant, Frost, Caldwell, Gagliardo, Haddad, Kok, Means, Noonan, Schargel & Wheeler, 2006, Dendrobates fulguritus Jungfer, Lötters & Jörgens, 2000,, Ranitomeya fulgurita (Silverstone, 1975), Andinobates fulguritus Brown, Twomey, Amézquita, Barbosa de Souza, Caldwell, Lötters, von May, Melo-Sampaio, Mejía-Vargas, Perez-Peña, Pepper, San…	Yellow-bellied poison-arrow frog, Yellow-bellied Poison Frog, Yellowbelly poison frog		Minyobate étincelant	true	CO, PA	Colombia, Panama	Colombia, Panama
67949	Animalia	Chordata	Amphibia	Anura	Dendrobatidae	Andinobates	geminisae		Andinobates geminisae	Batista, Jaramillo, Ponce, & Crawford, 2014	SPECIES	II	Appendix II:Formerly included in <i>Dendrobates</i> spp., prior to taxonomic change adopted at CoP16.	Appendix II:Formerly included in <i>Dendrobates</i> spp.	Appendix II:Anteriormente incluida en <i>Dendrobates</i> spp.	Appendix II:Précédemment inscrit sous <i>Dendrobates</i> spp.		Appendix II:					true	PA	Panama	Panama
3513	Animalia	Chordata	Amphibia	Anura	Dendrobatidae	Andinobates	minutus		Andinobates minutus	(Shreve, 1935)	SPECIES	II	Appendix II:Formerly included in <i>Dendrobates</i> spp., prior to taxonomic change adopted at CoP16.	Appendix II:Formerly included in <i>Dendrobates</i> spp.	Appendix II:Anteriormente incluida en <i>Dendrobates</i> spp.	Appendix II:Précédemment inscrit sous <i>Dendrobates</i> spp.		Appendix II:	Dendrobates shrevei Dunn, 1940, Minyobates minutus Myers, 1987, Ranitomeya minuta Anonymous, 1985, Dendrobates minutus minutus Shreve, 1935, Dendrobates minutus (Shreve, 1935), Minyobates minutus (Shreve, 1935), Andinobates minutus Brown, Twomey, Amézquita, Barbosa de Souza, Caldwell, Lötters, von May, Melo-Sampaio, Mejía-Vargas, Perez-Peña, Pepper, Sanchez-Rodriguez & Summers, 2011, Ranitomeya m…	Blue-bellied poison-arrow frog, Blue-bellied Poison Frog, Bluebelly poison frog		Minyobate menu	true	CO, PA	Colombia, Panama	Colombia, Panama
8460	Animalia	Chordata	Amphibia	Anura	Dendrobatidae	Andinobates	opisthomelas		Andinobates opisthomelas	(Boulenger, 1899)	SPECIES	II	Appendix II:Formerly included in <i>Dendrobates</i> spp., prior to taxonomic change adopted at CoP16.	Appendix II:Formerly included in <i>Dendrobates</i> spp.	Appendix II:Anteriormente incluida en <i>Dendrobates</i> spp.	Appendix II:Précédemment inscrit sous <i>Dendrobates</i> spp.		Appendix II:	Dendrobates opisthomelas Jungfer, Lötters & Jörgens, 2000, Minyobates opisthomelas (Boulenger, 1899), Ranitomeya opisthomelas Anonymous, 1985, Ranitomeya opisthomelas Grant, Frost, Caldwell, Gagliardo, Haddad, Kok, Means, Noonan, Schargel & Wheeler, 2006, Dendrobates opisthomelas (Boulenger, 1899), Ranitomeya opisthomelas (Boulenger, 1899), Minyobates opisthomelas Myers, 1987, Andinobates opistho…	Andean poison-arrow frog, Andean Poison Frog		Minyobate opisthomèle	true	CO	Colombia	Colombia
5208	Animalia	Chordata	Amphibia	Anura	Dendrobatidae	Andinobates	tolimensis		Andinobates tolimensis	Bernal-Bautista, Luna-Mora, Gallego & Quevedo-Gil, 2007	SPECIES	II	Appendix II:Formerly included in <i>Dendrobates</i> spp., prior to taxonomic change adopted at CoP16.	Appendix II:Formerly included in <i>Dendrobates</i> spp.	Appendix II:Anteriormente incluida en <i>Dendrobates</i> spp.	Appendix II:Précédemment inscrit sous <i>Dendrobates</i> spp.		Appendix II:	Ranitomeya tolimensis Bernal-Bautista, Luna-Mora, Gallego & Quevedo-Gil, 2007, Andinobates tolimensis Brown, Twomey, Amézquita, Barbosa de Souza, Caldwell, Lötters, von May, Melo-Sampaio, Mejía-Vargas, Perez-Peña, Pepper, Sanchez-Rodriguez & Summers, 2011, Ranitomeya tolimensis Frost, 2008, Ranitomeya tolimense Bernal-Bautista, Luna-Mora, Gallego & Quevedo-Gil, 2007				true	CO	Colombia	Colombia
10056	Animalia	Chordata	Amphibia	Anura	Dendrobatidae	Andinobates	viridis		Andinobates viridis	(Myers & Daly, 1976)	SPECIES	II	Appendix II:Formerly included in <i>Dendrobates</i> spp., prior to taxonomic change adopted at CoP16.	Appendix II:Formerly included in <i>Dendrobates</i> spp.	Appendix II:Anteriormente incluida en <i>Dendrobates</i> spp.	Appendix II:Précédemment inscrit sous <i>Dendrobates</i> spp.		Appendix II:	Ranitomeya viridis Grant, Frost, Caldwell, Gagliardo, Haddad, Kok, Means, Noonan, Schargel & Wheeler, 2006, Ranitomeya viridis (Myers & Daly, 1976), Minyobates viridis (Myers & Daly, 1976), Dendrobates viridis (Myers & Daly, 1976), Andinobates viridis Brown, Twomey, Amézquita, Barbosa de Souza, Caldwell, Lötters, von May, Melo-Sampaio, Mejía-Vargas, Perez-Peña, Pepper, Sanchez-Rodriguez & Summers…	Green Poison Frog	Rana de punta de flecha verde	Minyobate vert	true	CO	Colombia	Colombia
4699	Animalia	Chordata	Amphibia	Anura	Dendrobatidae	Andinobates	virolensis		Andinobates virolensis	(Ruiz-Carranza and Ramírez-Pinilla, 1992)	SPECIES	II	Appendix II:Formerly included in <i>Dendrobates</i> spp., prior to taxonomic change adopted at CoP16.	Appendix II:Formerly included in <i>Dendrobates</i> spp.	Appendix II:Anteriormente incluida en <i>Dendrobates</i> spp.	Appendix II:Précédemment inscrit sous <i>Dendrobates</i> spp.		Appendix II:	Minyobates virolinensis Ruiz-Carranza & Ramírez-Pinilla, 1992, Dendrobates virolinensis Jungfer, Lötters & Jörgens, 2000, Ranitomeya virolinensis Grant, Frost, Caldwell, Gagliardo, Haddad, Kok, Means, Noonan, Schargel & Wheeler, 2006, Ranitomeya virolinensis (Ruiz-Carranza & Ramírez-Pinilla, 1992), Dendrobates virolensis (Ruiz-Carranza and Ramírez-Pinilla, 1992), Andinobates virolinensis Brown, T…	Santander Poison Frog			true	CO	Colombia	Colombia
887	Animalia	Chordata	Amphibia	Caudata	Cryptobranchidae	Andrias			Andrias	Tschudi, 1837	GENUS	I	Appendix I:	Appendix I:	Appendix I:	Appendix I:		Appendix I:					true
9520	Animalia	Chordata	Amphibia	Caudata	Cryptobranchidae	Andrias	davidianus		Andrias davidianus	(Blanchard, 1871)	SPECIES	I	Appendix I:	Appendix I:	Appendix I:	Appendix I:		Appendix I:	Sieboldia davidi David, 1875, Hoplobatrachus davidi Möllendorff, 1877, Cryptobranchus davidianus (Blanchard, 1871), Megalobatrachus sligoi Boulenger, 1924, Megalobatrachus japonicus davidi Chang, 1935, Megalobatrachus davidianus (Blanchard, 1871), Megalobatrachus japonicus davidianus Pope & Boring, 1940, Megalobatrachus davidianus Liu, 1950, Sieboldia davidiana Blanchard, 1871, Andrias scheuchzer…	Chinese Giant Salamander	Salamandra gigante de China	Salamandre du père David, Salamandre géante de Chine	true	CN, TW	China, Taiwan, Province of China	China		Taiwan, Province of China
7171	Animalia	Chordata	Amphibia	Caudata	Cryptobranchidae	Andrias	japonicus		Andrias japonicus	(Temminck, 1836)	SPECIES	I	Appendix I:	Appendix I:	Appendix I:	Appendix I:		Appendix I:	Megalobatrachus maximus (Schlegel, 1837), Salamandra maxima Schlegel, 1837, Tritomegas sieboldi (Tschudi, 1837), Cryptobranchus maximus (Schlegel, 1837), Hydrosalamandra japonica (Temminck, 1836), Andrias scheuchzeri japonicus Westphal, 1958, Megalobatrachus japonicus japonicus Chang, 1936, Cryptobranchus sieboldia Calmette, 1907, Sieboldiana maxima Ishikawa, 1904, Megalobatrachus japonicus Bedda…	Japanese Giant Salamander	Salamandra gigante de Japón	Salamandre géante du Japon	true	JP, RU	Japan, Russian Federation	Japan						Russian Federation
68384	Animalia	Chordata	Amphibia	Anura	Aromobatidae	Anomaloglossus	rufulus		Anomaloglossus rufulus	Gorzula, 1990	SPECIES	II	Appendix II:Formerly included in <i>Epipedobates</i> spp., prior to taxonomic change adopted at CoP16. <p><i>Anomaloglossus</i> was split from <i>Allobates</i> in 2017, following taxonomic changes adopted at CoP17.</p>	Appendix II:Formerly included in <i>Epipedobates</i> spp. <p><i>Anomaloglossus</i> was split from <i>Allobates</i> in 2017, following taxonomic changes adopted at CoP17.</p>	Appendix II:Anteriormente incluida en <i>Epipedobates</i> spp. <p><i>Anomaloglossus</i> was split from <i>Allobates</i> in 2017, following taxonomic changes adopted at CoP17.</p>	Appendix II:Précédemment inscrit sous <i>Epipedobates</i> spp. <p><i>Anomaloglossus</i> was split from <i>Allobates</i> in 2017, following taxonomic changes adopted at CoP17.</p>		Appendix II: <p><i>Anomaloglossus</i> was split from <i>Allobates</i> in 2017, following taxonomic changes adopted at CoP17.</p>	Epipedobates rufulus Walls, 1994, Allobates rufulus (Gorzula, 1990), Allobates rufulus Grant, Frost, Caldwell, Gagliardo, Haddad, Kok, Means, Noonan, Schargel & Wheeler, 2006, Dendrobates rufulus Gorzula, 1990 "1988", Epipedobates rufulus (Gorzula, 1990 "1988")	Chimantá Poison Frog, Gorzula's Poison Frog, Sira poison frog, Tepui Poison Frog	Sapito rufo del chimanta	Dendrobate rougeâtre	true	VE	Venezuela (Bolivarian Republic of)	Venezuela (Bolivarian Republic of)
7380	Animalia	Chordata	Amphibia	Anura	Bufonidae	Atelopus	zeteki		Atelopus zeteki	Dunn, 1933	SPECIES	I	Appendix I:	Appendix I:	Appendix I:	Appendix I:		Appendix I:	Atelopus varius zeteki (Lichtenstein & Martens, 1856), Atelopus zeteki Kim, Brown, Mosher & Fuhrman, 1975, Atelopus varius zeteki Dunn, 1933	Cerro Campana Stubfoot Toad, Golden Arrow Poison Frog, Golden Frog, Panamanian golden frog, Zetek's Golden Frog	Rana dorada, Rana dorada de Panamá, Rana venenosa de Zetek	Atelope variable du Panama, Crapaud orange, Grenouille de Zetek, Grenouille dorée du Panama	true	PA	Panama	Panama
10869	Animalia	Chordata	Amphibia	Anura	Calyptocephalellidae	Calyptocephalella	gayi		Calyptocephalella gayi	(Duméril & Bibron, 1841)	SPECIES	III	Appendix III:	Appendix III:	Appendix III:	Appendix III:		Appendix III:	Caudiverbera caudiverbera Linnaeus, 1758	Chilean toad, Gay's frog, Helmeted water toad, Wide mouth toad	Rana chilena, Rana grande chilena		false	CL	Chile	Chile
5347	Animalia	Chordata	Amphibia	Caudata	Cryptobranchidae	Cryptobranchus	alleganiensis		Cryptobranchus alleganiensis	(Daudin, 1803)	SPECIES	III	Appendix III:	Appendix III:	Appendix III:	Appendix III:		Appendix III:	Salamandra alleghaniensis Gray, 1850, Cryptobranchus bishopi Collins, 1991, Cryptobranchus alleganiensis Bishop, 1943, Cryptobranchus bishopi Grobman, 1943, Cryptobranchus terassodactylos Wellborn, 1936, Cryptobranchus fuscus Garman, 1884, Salamandra maxima Barton, 1808, Salamandra gigantea Barton, 1808, Cryptobranchus alleganiensis Garman, 1884, Menopoma fuscum Yarrow, 1882, Salamandra (menopoma…	Hellbender			true	US	United States of America	United States of America
1430	Animalia	Chordata	Amphibia	Anura	Dendrobatidae	Dendrobates			Dendrobates	Wagler, 1830	GENUS	II	Appendix II:	Appendix II:	Appendix II:	Appendix II:		Appendix II:					true
9783	Animalia	Chordata	Amphibia	Anura	Dendrobatidae	Dendrobates	auratus		Dendrobates auratus	(Girard, 1855)	SPECIES	II	Appendix II:	Appendix II:	Appendix II:	Appendix II:		Appendix II:	Dendrobates latimaculatus Günther, 1859, Phyllobates auratus Girard, 1855, Hylaplesia aurata (Girard, 1855), Dendrobates tinctorius auratus (Schneider, 1799), Dendrobates trivittatus auratus (Spix, 1824), Dendrobates tinctorius auratus Laurent, 1942, Hylaplesia tinctoria latimaculata Dunn, 1941, Dendrobates auratus Dunn, 1931, Dendrobates trivittatus var. aurata Peters, 1873, Dendrobates tinctori…	Gold arrow-poison frog, Golden poison-arrow frog, Green and black poison-arrow frog, Green and black poison-dart frog, Green and black poison frog, Green-and-black Poison Frog, Green and golden poison-arrow frog, Green poison-arrow frog, Green Poison Frog		Dendrobate doré	true	CO, CR, NI, PA, US	Colombia, Costa Rica, Nicaragua, Panama, United States of America	Colombia, Costa Rica, Nicaragua, Panama	United States of America
9238	Animalia	Chordata	Amphibia	Anura	Dendrobatidae	Dendrobates	leucomelas		Dendrobates leucomelas	Steindachner, 1864	SPECIES	II	Appendix II:	Appendix II:	Appendix II:	Appendix II:		Appendix II:		Yellow-banded Poison Frog, Yellow-headed poison frog	Rana de punta de flecha de bandas amarillas, Sapito minero	Dendrobate jaune et noir	true	BR, CO, GY, VE	Brazil, Colombia, Guyana, Venezuela (Bolivarian Republic of)	Brazil, Colombia, Guyana, Venezuela (Bolivarian Republic of)
7505	Animalia	Chordata	Amphibia	Anura	Dendrobatidae	Dendrobates	nubeculosus		Dendrobates nubeculosus	Jungfer & Böhme, 2004	SPECIES	II	Appendix II:	Appendix II:	Appendix II:	Appendix II:		Appendix II:					true	GY	Guyana	Guyana
9978	Animalia	Chordata	Amphibia	Anura	Dendrobatidae	Dendrobates	tinctorius		Dendrobates tinctorius	(Cuvier, 1797)	SPECIES	II	Appendix II:	Appendix II:	Appendix II:	Appendix II:		Appendix II:	Calamita tinctorius Merrem, 1820, Dendrobates tinctorius Wagler, 1830, Dendrobates tinctorius Schneider, 1799, Hyla tinctoria Schneider, 1799, Dendrobates azureus Hoogmoed, 1969, Rana tinctoria Shaw, 1802, Hylaplesia tinctoria Boie In Schlegel, 1826, Dendrobates tinctorum Silverstone, 1975, Rana tinctoria (Schneider, 1799), Dendrobates tinctorius var. daudini Steindachner, 1864, Calamita tinctori…	Dyeing poison-arrow frog, Dyeing Poison Frog, Tinging frog		Dendrobate à tapirer, Dendrobate teint	true	BR, GF, GY, SR	Brazil, French Guiana [FR], Guyana, Suriname	Brazil, French Guiana [FR], Guyana, Suriname
5479	Animalia	Chordata	Amphibia	Anura	Dendrobatidae	Dendrobates	truncatus		Dendrobates truncatus	(Cope, 1861)	SPECIES	II	Appendix II:	Appendix II:	Appendix II:	Appendix II:		Appendix II:	Phyllobates truncatus Cope, 1861, Hylaplesia truncata (Cope, 1863)	Yellow-striped poison-arrow frog, Yellow-striped Poison Frog	Rana de punta de flecha truncada	Dendrobate du Rio Magdalena	true	CO	Colombia	Colombia
6833	Animalia	Chordata	Amphibia	Anura	Microhylidae	Dyscophus	antongilii		Dyscophus antongilii	Grandidier, 1877	SPECIES	II	Appendix II:	Appendix II:	Appendix II:	Appendix II:		Appendix II:	Discophus antongili Guibé, 1978, Dyscophus sanguineus Boettger, 1880, Dyscophus insularis var. antongilii Grandidier, 1877, Dyscophus insularis antongilii Grandidier, 1872, Dyscophus antongilii Boulenger, 1882, Discophus antongilii (Grandidier, 1877), Dyscophus antongilii var. pallidus Mocquard, 1895, Dyscophus insularis var. pallidus Grandidier, 1877, Discophus antongilii Guibé, 1950 "1948", Dys…	Tomato Frog		Crapaud rouge de Madagascar, Grenouille tomate	true	MG	Madagascar	Madagascar
67985	Animalia	Chordata	Amphibia	Anura	Microhylidae	Dyscophus	guineti		Dyscophus guineti	Grandidier, 1875	SPECIES	II	Appendix II:	Appendix II:	Appendix II:	Appendix II:		Appendix II:	Discophus guineti Guibé, 1978, Dyscophus guineti Steindachner, 1882, Dyscophus guineti Günther, 1877, Kalula guineti Grandidier, 1875, Kalula guineti Guibé, 1950 "1948", Plectropus guineti Knauer, 1878	Sambava Tomato Frog			true	MG	Madagascar	Madagascar
68012	Animalia	Chordata	Amphibia	Anura	Microhylidae	Dyscophus	insularis		Dyscophus insularis	Grandidier, 1872	SPECIES	II	Appendix II:	Appendix II:	Appendix II:	Appendix II:		Appendix II:	Dyscophus insularis Guibé, 1950 "1948", Dyscophus grandidieri Boulenger, 1896, Discophus insularis Guibé, 1950 "1948", Dyscophus grandidieri Parker, 1934, Dyscophus quinquelineatus Parker, 1934, Dyscophus grandidieri Blommers-Schlösser and Blanc, 1991, Discophus insularis Guibé, 1978, Dyscophus beloensis Guibé, 1950 "1948", Discophys quinquelineatus Noble and Parker, 1926, Dyscophus beloensis Moc…	Antsouhy Tomato Frog			true	MG	Madagascar	Madagascar
98234	Animalia	Chordata	Amphibia	Caudata	Salamandridae	Echinotriton	chinhaiensis		Echinotriton chinhaiensis	Chang, 1932	SPECIES	II	Appendix II:	Appendix II:	Appendix II:	Appendix II:		Appendix II:	Pleurodeles chinhaiensis Chang, 1932, Tylototriton chinhaiensis Chang, 1932, Tylototriton chinhaiensis	Chinhai Spiny Crocodile Newt, Chinhai Spiny Newt			true	CN	China	China
98235	Animalia	Chordata	Amphibia	Caudata	Salamandridae	Echinotriton	maxiquadratus		Echinotriton maxiquadratus	Hou, Wu, Yang, Zheng, Yuan, and Li, 2014	SPECIES	II	Appendix II:	Appendix II:	Appendix II:	Appendix II:		Appendix II:		Mountain Spiny Crocodile Newt, Mountain Spiny Newt			true	CN	China	China
2210	Animalia	Chordata	Amphibia	Anura	Dendrobatidae	Epipedobates			Epipedobates	Myers, 1987	GENUS	II	Appendix II:	Appendix II:Formerly included in <i>Dendrobates</i> spp.	Appendix II:Anteriormente incluida en <i>Dendrobates</i> spp.	Appendix II:Précédemment inscrit sous <i>Dendrobates</i> spp.		Appendix II:					true
11208	Animalia	Chordata	Amphibia	Anura	Dendrobatidae	Epipedobates	anthonyi		Epipedobates anthonyi	(Noble, 1921)	SPECIES	II	Appendix II:	Appendix II:Formerly included in <i>Dendrobates</i> spp.	Appendix II:Anteriormente incluida en <i>Dendrobates</i> spp.	Appendix II:Précédemment inscrit sous <i>Dendrobates</i> spp.		Appendix II:	Dendrobates anthonyi Myers, Daly & Malkin, 1978, Colostethus anthonyi (Noble, 1921), Ameerega anthonyi Frost, Grant, Faivovich, Bain, Haas, Haddad, de Sá, Channing, Wilkinson, Donnellan, Raxworthy, Campbell, Blotto, Moler, Drewes, Nussbaum, Lynch, Green & Wheeler, 2006, Phyllobates anthonyi Noble, 1921, Dendrobates anthonyi (Noble, 1921), Phyllobates anthonyi Silverstone, 1976, Epipedobates antho…	Anthony's Poison-Arrow Frog	Rana tricolor ecuatoriana		true	EC, PE	Ecuador, Peru	Ecuador, Peru
7387	Animalia	Chordata	Amphibia	Anura	Dendrobatidae	Epipedobates	boulengeri		Epipedobates boulengeri	(Barbour, 1909)	SPECIES	II	Appendix II:	Appendix II:Formerly included in <i>Dendrobates</i> spp.	Appendix II:Anteriormente incluida en <i>Dendrobates</i> spp.	Appendix II:Précédemment inscrit sous <i>Dendrobates</i> spp.		Appendix II:	Prostherapis femoralis Barbour, 1905, Colostethus boulengeri (Barbour, 1909), Prostherapis boulengeri Barbour, 1909, Phyllobates boulengeri Barbour and Noble, 1920, Phyllobates boulengeri (Barbour, 1909), Colostethus boulengeri Savage, 1968, Dendrobates boulengeri Myers, Daly & Malkin, 1978, Dendrobates boulengeri (Barbour, 1909), Epipedobates boulengeri Myers, 1987, Ameerega boulengeri Frost, Gr…	Marbled Poison Frog	Rana de punta de flecha de Boulenger	Epipedobate de Boulenger	true	CO, EC	Colombia, Ecuador	Colombia, Ecuador
67950	Animalia	Chordata	Amphibia	Anura	Dendrobatidae	Epipedobates	darwinwallacei		Epipedobates darwinwallacei	Cisnos-Heredia & Yánez-Muñoz, 2011	SPECIES	II	Appendix II:	Appendix II:Formerly included in <i>Dendrobates</i> spp.	Appendix II:Anteriormente incluida en <i>Dendrobates</i> spp.	Appendix II:Précédemment inscrit sous <i>Dendrobates</i> spp.		Appendix II:					true
5073	Animalia	Chordata	Amphibia	Anura	Dendrobatidae	Epipedobates	espinosai		Epipedobates espinosai	(Funkhouser, 1956)	SPECIES	II	Appendix II:	Appendix II:Formerly included in <i>Dendrobates</i> spp.	Appendix II:Anteriormente incluida en <i>Dendrobates</i> spp.	Appendix II:Précédemment inscrit sous <i>Dendrobates</i> spp.		Appendix II:	Phyllobates espinosai Funkhouser, 1956, Epipedobates espinosai Myers, 1987, Dendrobates espinosai (Funkhouser, 1956), Ameerega espinosai Frost, Grant, Faivovich, Bain, Haas, Haddad, de Sá, Channing, Wilkinson, Donnellan, Raxworthy, Campbell, Blotto, Moler, Drewes, Nussbaum, Lynch, Green & Wheeler, 2006, Dendrobates espinosai Myers, Daly & Malkin, 1978	Espinosa Poison Frog, Turquoise-bellied Poison Frog		Epipedobate d'Espinosa	true	EC	Ecuador	Ecuador
9411	Animalia	Chordata	Amphibia	Anura	Dendrobatidae	Epipedobates	machalilla		Epipedobates machalilla	(Coloma, 1995)	SPECIES	II	Appendix II:	Appendix II:Formerly included in <i>Dendrobates</i> spp.	Appendix II:Anteriormente incluida en <i>Dendrobates</i> spp.	Appendix II:Précédemment inscrit sous <i>Dendrobates</i> spp.		Appendix II:	Epipedobates machalilla Grant, Frost, Caldwell, Gagliardo, Haddad, Kok, Means, Noonan, Schargel & Wheeler, 2006, Colostethus machalilla Coloma, 1995		Rana nodriza de machalilla		true	EC	Ecuador	Ecuador
3197	Animalia	Chordata	Amphibia	Anura	Dendrobatidae	Epipedobates	narinensis		Epipedobates narinensis	Mueses-Cisneros, Cepeda-Quilindo & Moreno-Quintero, 2008	SPECIES	II	Appendix II:	Appendix II:Formerly included in <i>Dendrobates</i> spp.	Appendix II:Anteriormente incluida en <i>Dendrobates</i> spp.	Appendix II:Précédemment inscrit sous <i>Dendrobates</i> spp.		Appendix II:					true	CO	Colombia	Colombia
9487	Animalia	Chordata	Amphibia	Anura	Dendrobatidae	Epipedobates	tricolor		Epipedobates tricolor	(Boulenger, 1899)	SPECIES	II	Appendix II:	Appendix II:Formerly included in <i>Dendrobates</i> spp.	Appendix II:Anteriormente incluida en <i>Dendrobates</i> spp.	Appendix II:Précédemment inscrit sous <i>Dendrobates</i> spp.		Appendix II:	Dendrobates tricolor (Boulenger, 1899), Prostherapis tricolor Boulenger, 1899, Dendrobates tricolor Myers, Daly & Malkin, 1978,, Phyllobates tricolor (Boulenger, 1899), Ameerega tricolor Frost, Grant, Faivovich, Bain, Haas, Haddad, de Sá, Channing, Wilkinson, Donnellan, Raxworthy, Campbell, Blotto, Moler, Drewes, Nussbaum, Lynch, Green & Wheeler, 2006, Epipedobates tricolor Myers, 1987, Phyllobat…	Phantasmal Poison Frog	Rana de punta de flecha tricolor, Rana tricolor ecuatoriana	Epipedobate tricolore	true	EC	Ecuador	Ecuador
4945	Animalia	Chordata	Amphibia	Anura	Dicroglossidae	Euphlyctis	hexadactylus		Euphlyctis hexadactylus	(Lesson, 1834)	SPECIES	II	Appendix II:	Appendix II:	Appendix II:	Appendix II:		Appendix II:	Rana (dicroglossus) hexadactyla Dubois, 1974, Occidozyga (euphlyctis) hexadactyla Dubois, 1987 "1986", Rana robusta Blyth, 1855, Rana saparoua Duméril & Bibron, 1841, Occidozyga hexadactyla (Lesson, 1834), Euphlyctis hexadactyla Poynton & Broadley, 1985, Euphlyctis hexadactylus Dubois, 1992, Rana (rana) hexadactyla Boulenger, 1920, Rana hexadactyla Lesson, 1834, Phrynoderma cutiporum (Duméril & B…	Green Pond Frog, Indian Bullfrog, Indian Five-fingered Frog, Indian Green Frog, Indian Pond Frog, Six-fingered Frog, Six-toed Frog		Grenouille du Bengale, Grenouille hexadactyle	true	BD, IN, PK, LK	Bangladesh, India, Pakistan, Sri Lanka	Bangladesh, India, Pakistan, Sri Lanka
2675	Animalia	Chordata	Amphibia	Anura	Dendrobatidae	Excidobates			Excidobates		GENUS	II	Appendix II:Formerly included in <i>Dendrobates</i> spp., prior to taxonomic change adopted at CoP16.	Appendix II:Formerly included in <i>Dendrobates</i> spp.	Appendix II:Anteriormente incluida en <i>Dendrobates</i> spp.	Appendix II:Précédemment inscrit sous <i>Dendrobates</i> spp.		Appendix II:					true
6129	Animalia	Chordata	Amphibia	Anura	Dendrobatidae	Excidobates	captivus		Excidobates captivus	(Myers, 1982)	SPECIES	II	Appendix II:Formerly included in <i>Dendrobates</i> spp., prior to taxonomic change adopted at CoP16.	Appendix II:Formerly included in <i>Dendrobates</i> spp.	Appendix II:Anteriormente incluida en <i>Dendrobates</i> spp.	Appendix II:Précédemment inscrit sous <i>Dendrobates</i> spp.		Appendix II:	Dendrobates captivus Myers, 1982, Excidobates captivus Twomey & Brown, 2008, Adelphobates captivus (Myers, 1982), Ranitomeya captiva Bauer, 1988, Adelphobates captivus Grant, Frost, Caldwell, Gagliardo, Haddad, Kok, Means, Noonan, Schargel & Wheeler, 2006	Rio Santiago Poison Frog	Rana venenosa	Dendrobate du Rio Santiago	true	PE	Peru	Peru
67951	Animalia	Chordata	Amphibia	Anura	Dendrobatidae	Excidobates	condor		Excidobates condor	Almendáriz, Ron, & Brito-M, 2012	SPECIES	II	Appendix II:Formerly included in <i>Dendrobates</i> spp., prior to taxonomic change adopted at CoP16.	Appendix II:Formerly included in <i>Dendrobates</i> spp.	Appendix II:Anteriormente incluida en <i>Dendrobates</i> spp.	Appendix II:Précédemment inscrit sous <i>Dendrobates</i> spp.		Appendix II:					true	EC	Ecuador	Ecuador
9596	Animalia	Chordata	Amphibia	Anura	Dendrobatidae	Excidobates	mysteriosus		Excidobates mysteriosus	Myers, 1982	SPECIES	II	Appendix II:Formerly included in <i>Dendrobates</i> spp., prior to taxonomic change adopted at CoP16.	Appendix II:Formerly included in <i>Dendrobates</i> spp.	Appendix II:Anteriormente incluida en <i>Dendrobates</i> spp.	Appendix II:Précédemment inscrit sous <i>Dendrobates</i> spp.		Appendix II:	Ranitomeya mysteriosa Bauer, 1988, Dendrobates mysteriosus Myers, 1982, "dendrobates" mysteriosus Grant, Frost, Caldwell, Gagliardo, Haddad, Kok, Means, Noonan, Schargel & Wheeler, 2006, Excidobates mysteriosus Twomey & Brown, 2008	Maranon Poison Frog	Rana de punta de flecha misteriosa, Rana venenosa	Dendrobate mystérieux	true	PE	Peru	Peru
7105	Animalia	Chordata	Amphibia	Anura	Dicroglossidae	Hoplobatrachus	tigerinus		Hoplobatrachus tigerinus	(Daudin, 1802)	SPECIES	II	Appendix II:	Appendix II:	Appendix II:	Appendix II:		Appendix II:	Limnonectes (hoplobatrachus) tigerinus Dubois, 1987 "1986", Rana tigerina Daudin, 1802, Limnonectes tigerinus (Daudin, 1802), Rana tigrina Merrem, 1820, Tigrina tigrina Fei, Ye & Huang, 1990, Rana (rana) tigrina Boulenger, 1920, Dicroglossus tigerinus (Daudin, 1802), Dicroglossus tigrinus Deckert, 1938, Hoplobatrachus tigerinus Dubois, 1992, Rana (euphlyctis) tigerina Dubois, 1981, Rana tigerina …	Bull frog, Indian Bullfrog, Tiger Frog, Tiger peters frog		Grenouille tigre, Grenouille tigrée	true	AF, BD, BT, IN, MG, MM, NP, PK	Afghanistan, Bangladesh, Bhutan, India, Madagascar, Myanmar, Nepal, Pakistan	Afghanistan, Bangladesh, Bhutan, India, Myanmar, Nepal, Pakistan	Madagascar
8305	Animalia	Chordata	Amphibia	Anura	Dendrobatidae	Hyloxalus	azureiventris		Hyloxalus azureiventris	(Kneller & Henle, 1985)	SPECIES	II	Appendix II:Formerly listed under synonym <i>Cryptophyllobates azureiventris</i>, prior to taxonomic change adopted at CoP16.	Appendix II:Formerly listed under synonym <i>Cryptophyllobates azureiventris</i>.	Appendix II:Anteriormente incluida como el sinónimo <i>Cryptophyllobates azureiventris</i>.	Appendix II:Précédemment inscrit comme le synonyme <i>Cryptophyllobates azureiventris</i>.		Appendix II:	Dendrobates azureiventris (Kneller & Henle, 1985), Phyllobates azureiventris Kneller & Henle, 1985, Cryptophyllobates azureiventris (Kneller & Henle, 1985), Epipedobates azureiventris (Kneller & Henle, 1985)	Sky blue poison dart frog, Sky-blue Poison Frog	Rana de punta de flecha de vientre azul, Rana venenosa, Rana venenosa azul cielo	Epipedobate au ventre bleu	false	PE	Peru	Peru
5806	Animalia	Chordata	Amphibia	Caudata	Hynobiidae	Hynobius	amjiensis		Hynobius amjiensis	Gu, 1992	SPECIES	III	Appendix III:	Appendix III:	Appendix III:	Appendix III:		Appendix III:					false	CN	China	China
4590	Animalia	Chordata	Amphibia	Anura	Bufonidae	Incilius	periglenes		Incilius periglenes	(Savage, 1967)	SPECIES	I	Appendix I:Formerly listed under synonym <i>Bufo periglenes</i>, prior to taxonomic change adopted at CoP16.	Appendix I:Formerly listed under synonym <i>Bufo periglenes</i>.	Appendix I:Anteriormente incluida como el sinónimo <i>Bufo periglenes</i>.	Appendix I:Précédemment inscrit comme le synonyme <i>Bufo periglenes</i>.		Appendix I:	Cranopsis periglenes Frost, Grant, Faivovich, Bain, Haas, Haddad, de Sá, Channing, Wilkinson, Donnellan, Raxworthy, Campbell, Blotto, Moler, Drewes, Nussbaum, Lynch, Green & Wheeler, 2006, Incilius periglenes Frost, Mendelson & Pramuk, 2009, Cranopsis periglenes (Savage, 1967 "1966"), Ollotis periglenes Frost, Grant & Mendelson, 2006, Bufo periglenes Savage, 1967 "1966"	Alajuela Toad, Golden Toad, Monte verde golden toad, Monte Verde Toad, Orange Toad	Sapo dorado, Sapo dorado de Monteverde	Crapaud doré	true	CR	Costa Rica					Costa Rica
2576	Animalia	Chordata	Amphibia	Anura	Mantellidae	Mantella			Mantella	Boulenger, 1882	GENUS	II	Appendix II:	Appendix II:	Appendix II:	Appendix II:		Appendix II:					true
6876	Animalia	Chordata	Amphibia	Anura	Mantellidae	Mantella	aurantiaca		Mantella aurantiaca	Mocquard, 1900	SPECIES	II	Appendix II:	Appendix II:Included in <i>Mantella</i> spp.	Appendix II:Incluida en <i>Mantella</i> spp.	Appendix II:Inscrit sous <i>Mantella</i> spp.		Appendix II:		Ginger Tree Frog, Golden Frog, Golden Mantella, Madagascan golden frog, Malagasy golden mantella, Orange mantella, Red mantella	Rana dorada, Ranita dorada de Madagascar	Mantelle dorée	true	MG	Madagascar	Madagascar
9621	Animalia	Chordata	Amphibia	Anura	Mantellidae	Mantella	baroni		Mantella baroni	Boulenger, 1888	SPECIES	II	Appendix II:	Appendix II:	Appendix II:	Appendix II:		Appendix II:	Phrynomantis maculatus Thominot, 1889, Mantella aff. baroni	Baron's mantella, Baron’s Mantella, Harlequin Mantella, Variegated Golden Frog, Variegated Mantella			true	MG	Madagascar	Madagascar
5042	Animalia	Chordata	Amphibia	Anura	Mantellidae	Mantella	bernhardi		Mantella bernhardi	Vences, Glaw, Peyrieras, Böhme & Busse, 1994	SPECIES	II	Appendix II:	Appendix II:	Appendix II:	Appendix II:		Appendix II:		Bernhard's Mantella, Black Mantella, Tolongoina Golden Frog			true	MG	Madagascar	Madagascar
3360	Animalia	Chordata	Amphibia	Anura	Mantellidae	Mantella	betsileo		Mantella betsileo	(Grandidier, 1872)	SPECIES	II	Appendix II:	Appendix II:	Appendix II:	Appendix II:		Appendix II:	Dendrobates betsileo Grandidier, 1872, Dendrobates dendrobates ebenaui Boettger, 1880	Betsileo Golden Frog, Bronze Mantella, Brown Mantella			true	MG	Madagascar	Madagascar
3379	Animalia	Chordata	Amphibia	Anura	Mantellidae	Mantella	cowanii		Mantella cowanii	Boulenger, 1882	SPECIES	II	Appendix II:	Appendix II:	Appendix II:	Appendix II:		Appendix II:		Black Golden Frog, Cowan's golden frog, Cowan’s Golden Frog, Cowan's Mantella			true	MG	Madagascar	Madagascar
8443	Animalia	Chordata	Amphibia	Anura	Mantellidae	Mantella	crocea		Mantella crocea	Pintak & Böhme, 1990	SPECIES	II	Appendix II:	Appendix II:	Appendix II:	Appendix II:		Appendix II:		Eastern Golden Frog, Eastern mantella, Yellow Mantella			true	MG	Madagascar	Madagascar
6049	Animalia	Chordata	Amphibia	Anura	Mantellidae	Mantella	ebenaui		Mantella ebenaui	(Boettger, 1880)	SPECIES	II	Appendix II:	Appendix II:	Appendix II:	Appendix II:		Appendix II:	Dendrobates dendrobates ebenaui Boettger, 1880, Mantella mantella attemsi Werner, 1901, Mantella ebenaui Boulenger, 1882	Ebenau's Golden Frog			true	MG	Madagascar	Madagascar
7588	Animalia	Chordata	Amphibia	Anura	Mantellidae	Mantella	expectata		Mantella expectata	Busse & Böhme, 1992	SPECIES	II	Appendix II:	Appendix II:	Appendix II:	Appendix II:		Appendix II:		Blue-legged Mantella, Tular golden frog, Tular mantella, Tulear Golden Frog			true	MG	Madagascar	Madagascar
8553	Animalia	Chordata	Amphibia	Anura	Mantellidae	Mantella	haraldmeieri		Mantella haraldmeieri	Busse, 1981	SPECIES	II	Appendix II:	Appendix II:	Appendix II:	Appendix II:		Appendix II:	Mantella madagascariensis haraldmeieri (Grandidier, 1872), Mantella haraldmeieri Meier, 1986, Mantella madagascariensis haraldmeieri Busse, 1981	Haraldmeier's Mantella, Tolagnaro Golden Frog			true	MG	Madagascar	Madagascar
8177	Animalia	Chordata	Amphibia	Anura	Mantellidae	Mantella	laevigata		Mantella laevigata	Methuen & Hewitt, 1913	SPECIES	II	Appendix II:	Appendix II:	Appendix II:	Appendix II:		Appendix II:		Arboreal Mantella, Climbing Mantella, Folohy Golden Frog, Green-backed Mantella			true	MG	Madagascar	Madagascar
6860	Animalia	Chordata	Amphibia	Anura	Mantellidae	Mantella	madagascariensis		Mantella madagascariensis	(Grandidier, 1872)	SPECIES	II	Appendix II:	Appendix II:	Appendix II:	Appendix II:		Appendix II:	Dendrobates madagascariensis Grandidier, 1872, Mantella loppei Roux, 1935, Mantella madagascariensis Boulenger, 1882	Madagascan Mantella, Madagascar Golden Frog, Malagasy Mantella, Painted Mantella			true	MG	Madagascar	Madagascar
10812	Animalia	Chordata	Amphibia	Anura	Mantellidae	Mantella	manery		Mantella manery	Vences, Glaw & Böhme, 1999	SPECIES	II	Appendix II:	Appendix II:	Appendix II:	Appendix II:		Appendix II:		Marojejy mantella, Marojezy Mantella, Marojezy Mountain Mantella			true	MG	Madagascar	Madagascar
9806	Animalia	Chordata	Amphibia	Anura	Mantellidae	Mantella	milotympanum		Mantella milotympanum	Staniszewski, 1996	SPECIES	II	Appendix II:	Appendix II:	Appendix II:	Appendix II:		Appendix II:	Mantella aurantiaca milotympanum Staniszewski, 1996, Mantella aurantiaca milotympanum Mocquard, 1900	Black-eared Golden Mantella, Black-eared Mantella			true	MG	Madagascar	Madagascar
7544	Animalia	Chordata	Amphibia	Anura	Mantellidae	Mantella	nigricans		Mantella nigricans	Guibé, 1978	SPECIES	II	Appendix II:	Appendix II:	Appendix II:	Appendix II:		Appendix II:	Mantella madagascariensis nigricans Busse, 1981, Mantella cowani nigricans Guibé, 1978, Mantella nigricans Vences, Glaw & Böhme, 1999, Mantella cowanii nigricans Boulenger, 1882	Guibé's Mantella			true	MG	Madagascar	Madagascar
8837	Animalia	Chordata	Amphibia	Anura	Mantellidae	Mantella	pulchra		Mantella pulchra	Parker, 1925	SPECIES	II	Appendix II:	Appendix II:	Appendix II:	Appendix II:		Appendix II:	Mantella cowanii pulchra Boulenger, 1882, Mantella cowani pulchra Andreone, 1992	Beautiful Mantella, Parker's Golden Frog, Parker's mantella, Parker’s Mantella, Splendid Mantella			true	MG	Madagascar	Madagascar
8063	Animalia	Chordata	Amphibia	Anura	Mantellidae	Mantella	viridis		Mantella viridis	Pintak & Böhme, 1988	SPECIES	II	Appendix II:	Appendix II:	Appendix II:	Appendix II:		Appendix II:		Green Golden Frog, Green Mantella, Lime Mantella			true	MG	Madagascar	Madagascar
1124	Animalia	Chordata	Amphibia	Anura	Dendrobatidae	Minyobates			Minyobates		GENUS	II	Appendix II:Formerly included in <i>Dendrobates</i> spp., prior to taxonomic change adopted at CoP16.	Appendix II:Formerly included in <i>Dendrobates</i> spp.	Appendix II:Anteriormente incluida en <i>Dendrobates</i> spp.	Appendix II:Précédemment inscrit sous <i>Dendrobates</i> spp.		Appendix II:					true
6785	Animalia	Chordata	Amphibia	Anura	Dendrobatidae	Minyobates	steyermarki		Minyobates steyermarki	(Rivero, 1971)	SPECIES	II	Appendix II:Formerly included in <i>Dendrobates</i> spp., prior to taxonomic change adopted at CoP16.	Appendix II:Formerly included in <i>Dendrobates</i> spp.	Appendix II:Anteriormente incluida en <i>Dendrobates</i> spp.	Appendix II:Précédemment inscrit sous <i>Dendrobates</i> spp.		Appendix II:	Minyobates dendrobates steyermarki Rivero, 1971, Dendrobates steyermarki Jungfer, Lötters & Jörgens, 2000, Dendrobates steyermarki Rivero, 1971, Minyobates steyermarki Myers, 1987	Demonic Poison Frog	Rana de punta de flecha de Steyermark, Sapito rojo del yapacana	Minyobate de Steyermark	true	VE	Venezuela (Bolivarian Republic of)	Venezuela (Bolivarian Republic of)
1956	Animalia	Chordata	Amphibia	Anura	Bufonidae	Nectophrynoides			Nectophrynoides	Noble, 1926	GENUS	I	Appendix I:	Appendix I:	Appendix I:	Appendix I:		Appendix I:					true
8751	Animalia	Chordata	Amphibia	Anura	Bufonidae	Nectophrynoides	asperginis		Nectophrynoides asperginis	Poynton, Howell, Clarke & Lovett, 1999	SPECIES	I	Appendix I:	Appendix I:	Appendix I:	Appendix I:		Appendix I:		Kihansi spray toad			true	TZ	United Republic of Tanzania				United Republic of Tanzania
10469	Animalia	Chordata	Amphibia	Anura	Bufonidae	Nectophrynoides	cryptus		Nectophrynoides cryptus	Perret, 1971	SPECIES	I	Appendix I:	Appendix I:	Appendix I:	Appendix I:		Appendix I:		Secret Tree Toad		Nectophrynoide cryptique	true	TZ	United Republic of Tanzania	United Republic of Tanzania
54740	Animalia	Chordata	Amphibia	Anura	Bufonidae	Nectophrynoides	frontierei		Nectophrynoides frontierei	Menegon, Salvidio & Loader, 2004	SPECIES	I	Appendix I:	Appendix I:	Appendix I:	Appendix I:		Appendix I:		Frontier Forest Toad			true	TZ	United Republic of Tanzania	United Republic of Tanzania
54741	Animalia	Chordata	Amphibia	Anura	Bufonidae	Nectophrynoides	laevis		Nectophrynoides laevis	Menegon, Salvidio & Loader, 2004	SPECIES	I	Appendix I:	Appendix I:	Appendix I:	Appendix I:		Appendix I:		Smooth Forest Toad			true	TZ	United Republic of Tanzania	United Republic of Tanzania
54742	Animalia	Chordata	Amphibia	Anura	Bufonidae	Nectophrynoides	laticeps		Nectophrynoides laticeps	Channing, Menegon, Salvidio & Akker, 2005	SPECIES	I	Appendix I:	Appendix I:	Appendix I:	Appendix I:		Appendix I:					true	TZ	United Republic of Tanzania	United Republic of Tanzania
9477	Animalia	Chordata	Amphibia	Anura	Bufonidae	Nectophrynoides	minutus		Nectophrynoides minutus	Perret, 1972	SPECIES	I	Appendix I:	Appendix I:	Appendix I:	Appendix I:		Appendix I:		Minute Tree Toad		Nectophrynoide menu	true	TZ	United Republic of Tanzania	United Republic of Tanzania
54743	Animalia	Chordata	Amphibia	Anura	Bufonidae	Nectophrynoides	paulae		Nectophrynoides paulae	Menegon, Salvidio, Ngalason & Loader, 2007	SPECIES	I	Appendix I:	Appendix I:	Appendix I:	Appendix I:		Appendix I:					true	TZ	United Republic of Tanzania	United Republic of Tanzania
54744	Animalia	Chordata	Amphibia	Anura	Bufonidae	Nectophrynoides	poyntoni		Nectophrynoides poyntoni	Menegon, Salvidio & Loader, 2004	SPECIES	I	Appendix I:	Appendix I:	Appendix I:	Appendix I:		Appendix I:		Poynton's Forest Toad			true	TZ	United Republic of Tanzania	United Republic of Tanzania
54745	Animalia	Chordata	Amphibia	Anura	Bufonidae	Nectophrynoides	pseudotornieri		Nectophrynoides pseudotornieri	Menegon, Salvidio & Loader, 2004	SPECIES	I	Appendix I:	Appendix I:	Appendix I:	Appendix I:		Appendix I:		Pseudo Forest Toad			true	TZ	United Republic of Tanzania	United Republic of Tanzania
10076	Animalia	Chordata	Amphibia	Anura	Bufonidae	Nectophrynoides	tornieri		Nectophrynoides tornieri	(Roux, 1906)	SPECIES	I	Appendix I:	Appendix I:	Appendix I:	Appendix I:		Appendix I:	Nectophryne tornieri Roux, 1906, Nectophrynoides tornieri Barbour and Loveridge, 1928	Tornier's Tree Toad, Usambara Viviparous Toad		Nectophrynoide des Monts Usambara, Nectophrynoide de Tornier	true	TZ	United Republic of Tanzania	United Republic of Tanzania
54747	Animalia	Chordata	Amphibia	Anura	Bufonidae	Nectophrynoides	vestergaardi		Nectophrynoides vestergaardi	Menegon, Salvidio & Loader, 2004	SPECIES	I	Appendix I:	Appendix I:	Appendix I:	Appendix I:		Appendix I:		Vestergaard's Forest Toad			true	TZ	United Republic of Tanzania	United Republic of Tanzania
5328	Animalia	Chordata	Amphibia	Anura	Bufonidae	Nectophrynoides	viviparus		Nectophrynoides viviparus	(Tornier, 1905)	SPECIES	I	Appendix I:	Appendix I:	Appendix I:	Appendix I:		Appendix I:	Nectophrynoides viviparus Perret, 1971, Nectophrynoides vivipara Noble, 1926, Tornierobates vivipara Miranda-Ribeiro, 1926, Tornieriobates vivipara (Tornier, 1905), Pseudophryne vivipara Tornier, 1905, Nectophryne werthi Nieden, 1911 "1910"	Morogoro Tree Toad, Robust forest toad, Rungwe Viviparous Toad		Nectophrynoide des Monts Uluguru	true	TZ	United Republic of Tanzania	United Republic of Tanzania
5369	Animalia	Chordata	Amphibia	Anura	Bufonidae	Nectophrynoides	wendyae		Nectophrynoides wendyae	Clarke, 1988	SPECIES	I	Appendix I:	Appendix I:	Appendix I:	Appendix I:		Appendix I:	Nectophrynoides wendyi Graybeal and Cannatella, 1995	Uzungwe Scarp Tree Toad, Wendy's forest toad		Nectophrynoide des Monts Uzungwe	true	TZ	United Republic of Tanzania	United Republic of Tanzania
5003	Animalia	Chordata	Amphibia	Caudata	Salamandridae	Neurergus	kaiseri		Neurergus kaiseri	Schmidt, 1952	SPECIES	I	Appendix I:	Appendix I:	Appendix I:	Appendix I:		Appendix I:	Neurergus (neurergus) kaiseri Dubois and Raffaëlli, 2009, Neurergus crocatus kaiseri Schmidt, 1952, Neurergus crocatus kaiseri Thorn, 1968, Neurergus kaiseri Schmidtler and Schmidtler, 1970	Kaiser's mountain newt, Kaiser’s spotted newt, Lorestan mountain newt, Lurestan Newt, Luristan Newt			true	IR, IQ, TR	Iran (Islamic Republic of), Iraq, Turkey	Iran (Islamic Republic of)						Iraq, Turkey
1361	Animalia	Chordata	Amphibia	Anura	Bufonidae	Nimbaphrynoides			Nimbaphrynoides	Dubois, 1987	GENUS	I	Appendix I:	Appendix I:Formerly included in <i>Nectophrynoides</i> spp.	Appendix I:Anteriormente incluida en <i>Nectophrynoides</i> spp.	Appendix I:Précédemment inscrit sous <i>Nectophrynoides</i> spp.		Appendix I:					true
3194	Animalia	Chordata	Amphibia	Anura	Bufonidae	Nimbaphrynoides	occidentalis		Nimbaphrynoides occidentalis	Angel, 1943	SPECIES	I	Appendix I:	Appendix I:Formerly included in <i>Nectophrynoides</i> spp.	Appendix I:Anteriormente incluida en <i>Nectophrynoides</i> spp.	Appendix I:Précédemment inscrit sous <i>Nectophrynoides</i> spp.		Appendix I:	Nectophrynoides occidentalis occidentalis Sandberger, Hillers, Doumbia, Loua, Brede & Rödel, 2010, Nectophrynoides occidentalis liberiensis Sandberger, Hillers, Doumbia, Loua, Brede & Rödel, 2010, Nectophrynoides liberiensis Xavier, 1979 "1978", Nectophrynoides occidentalis Angel, 1943, Nimbaphrynoides occidentalis Dubois, 1987 "1986", Nimbaphrynoides liberiensis Dubois, 1987	Mount Nimba Viviparous Toad, Western Nimba Toad	Sapo vivíparo de África occidental	Nectophrynoide du Mont Nimba	true	CI, GN, LR	Côte d'Ivoire, Guinea, Liberia	Côte d'Ivoire, Guinea, Liberia
1114	Animalia	Chordata	Amphibia	Anura	Dendrobatidae	Oophaga			Oophaga		GENUS	II	Appendix II:Formerly included in <i>Dendrobates</i> spp., prior to taxonomic change adopted at CoP16.	Appendix II:Formerly included in <i>Dendrobates</i> spp.	Appendix II:Anteriormente incluida en <i>Dendrobates</i> spp.	Appendix II:Précédemment inscrit sous <i>Dendrobates</i> spp.		Appendix II:					true
4826	Animalia	Chordata	Amphibia	Anura	Dendrobatidae	Oophaga	arborea		Oophaga arborea	(Myers, Daly & Martínez, 1984)	SPECIES	II	Appendix II:Formerly included in <i>Dendrobates</i> spp., prior to taxonomic change adopted at CoP16.	Appendix II:Formerly included in <i>Dendrobates</i> spp.	Appendix II:Anteriormente incluida en <i>Dendrobates</i> spp.	Appendix II:Précédemment inscrit sous <i>Dendrobates</i> spp.		Appendix II:	Oophaga arborea Bauer, 1994, Dendrobates arboreus Myers, Daly & Martínez, 1984	Polkadot Poison Frog	Rana de punta de flecha arbórea, Rana venenosa	Dendrobate arboricole	true	PA	Panama	Panama
7176	Animalia	Chordata	Amphibia	Anura	Dendrobatidae	Oophaga	granulifera		Oophaga granulifera	(Taylor, 1958)	SPECIES	II	Appendix II:Formerly included in <i>Dendrobates</i> spp., prior to taxonomic change adopted at CoP16.	Appendix II:Formerly included in <i>Dendrobates</i> spp.	Appendix II:Anteriormente incluida en <i>Dendrobates</i> spp.	Appendix II:Précédemment inscrit sous <i>Dendrobates</i> spp.		Appendix II:	Dendrobates granulifer Duellman, 1993, Ranitomeya granuliferus Anonymous, 1985, Oophaga granulifera Bauer, 1994, Dendrobates granuliferus Taylor, 1958	Granular poison-arrow frog, Granular Poison Frog, Granulated poison-dart frog	Rana de punta de flecha granulosa	Dendrobate granuleux	true	CR, PA	Costa Rica, Panama	Costa Rica						Panama
3629	Animalia	Chordata	Amphibia	Anura	Dendrobatidae	Oophaga	histrionica		Oophaga histrionica	(Berthold, 1845)	SPECIES	II	Appendix II:Formerly included in <i>Dendrobates</i> spp., prior to taxonomic change adopted at CoP16.	Appendix II:Formerly included in <i>Dendrobates</i> spp.	Appendix II:Anteriormente incluida en <i>Dendrobates</i> spp.	Appendix II:Précédemment inscrit sous <i>Dendrobates</i> spp.		Appendix II:	Dendrobates tinctorius confluens Cochran and Goin, 1970, Dendrobates tinctorius confluens (Schneider, 1799), Dendrobates dendrobates histrionicus (Berthold, 1845), Dendrobates tinctorius wittei (Schneider, 1799), Dendrobates tinctorius wittei Laurent, 1942, Dendrobates tinctorius histrionicus Laurent, 1942, Dendrobates sylvaticus Funkhouser, 1956, Dendrobates histrionica Dunn, 1944, Dendrobates h…	Common poison-arrow frog, Harlequin Poison Frog, Red-and-black Poison Frog	Rana de punta de flecha histriónica		true	CO	Colombia	Colombia
7595	Animalia	Chordata	Amphibia	Anura	Dendrobatidae	Oophaga	lehmanni		Oophaga lehmanni	(Myers & Daly, 1976)	SPECIES	II	Appendix II:Formerly included in <i>Dendrobates</i> spp., prior to taxonomic change adopted at CoP16.	Appendix II:Formerly included in <i>Dendrobates</i> spp.	Appendix II:Anteriormente incluida en <i>Dendrobates</i> spp.	Appendix II:Précédemment inscrit sous <i>Dendrobates</i> spp.		Appendix II:	Oophaga lehmanni Bauer, 1994, Dendrobates lehmanni Myers & Daly, 1976	Lehmann's Poison Frog, Red-banded Poison Frog	Rana de punta de flecha de Lehmann	Dendrobate de Lehman	true	CO	Colombia	Colombia
5993	Animalia	Chordata	Amphibia	Anura	Dendrobatidae	Oophaga	occultator		Oophaga occultator	(Myers & Daly, 1976)	SPECIES	II	Appendix II:Formerly included in <i>Dendrobates</i> spp., prior to taxonomic change adopted at CoP16.	Appendix II:Formerly included in <i>Dendrobates</i> spp.	Appendix II:Anteriormente incluida en <i>Dendrobates</i> spp.	Appendix II:Précédemment inscrit sous <i>Dendrobates</i> spp.		Appendix II:	Oophaga occultator Bauer, 1994, Dendrobates occultator Myers & Daly, 1976	La Brea Poison Frog		Dendrobate occulté	true	CO	Colombia	Colombia
9003	Animalia	Chordata	Amphibia	Anura	Dendrobatidae	Oophaga	pumilio		Oophaga pumilio	(Schmidt, 1857)	SPECIES	II	Appendix II:Formerly included in <i>Dendrobates</i> spp., prior to taxonomic change adopted at CoP16.	Appendix II:Formerly included in <i>Dendrobates</i> spp.	Appendix II:Anteriormente incluida en <i>Dendrobates</i> spp.	Appendix II:Précédemment inscrit sous <i>Dendrobates</i> spp.		Appendix II:	Hylaplesia typographa Brocchi, 1882, Hylaplesia pumilio Günther, 1859 "1858", Hylaplesia ignita Knauer, 1883, Dendrobates typographicus Oertter, 1951, Oophaga pumilio Bauer, 1994, Hylaplesia pumilio (Schmidt, 1857), Dendrobates galindoi Trapido, 1953, Hylaplesia typographa (Keferstein, 1867), Dendrobates typographus Keferstein, 1867, Dendrobates ignitus Cope, 1874, Hylaplesia ignita (Cope, 1874),…	Flaming poison-arrow frog, Flaming Poison Frog, Red-and-blue Poison Frog, Strawberry poison-dart frog, Strawberry Poison Frog	Rana de punta de flecha roja	Dendrobate pumilio	true	CR, NI, PA	Costa Rica, Nicaragua, Panama	Costa Rica, Nicaragua, Panama
7154	Animalia	Chordata	Amphibia	Anura	Dendrobatidae	Oophaga	speciosa		Oophaga speciosa	(Schmidt, 1857)	SPECIES	II	Appendix II:Formerly included in <i>Dendrobates</i> spp., prior to taxonomic change adopted at CoP16.	Appendix II:Formerly included in <i>Dendrobates</i> spp.	Appendix II:Anteriormente incluida en <i>Dendrobates</i> spp.	Appendix II:Précédemment inscrit sous <i>Dendrobates</i> spp.		Appendix II:	Dendrobates dendrobates speciosus Schmidt, 1857, Hylaplesia speciosa (Schmidt, 1857), Hylaplesia speciosa Günther, 1859 "1858", Dendrobates speciosus Savage, 1968, Oophaga speciosa Bauer, 1994	Splendid Poison Frog		Epipedobate brillant	true	PA	Panama	Panama
7076	Animalia	Chordata	Amphibia	Anura	Dendrobatidae	Oophaga	sylvatica		Oophaga sylvatica	(Funkhouser, 1956)	SPECIES	II	Appendix II:Formerly included in <i>Dendrobates</i> spp., prior to taxonomic change adopted at CoP16.	Appendix II:Formerly included in <i>Dendrobates</i> spp.	Appendix II:Anteriormente incluida en <i>Dendrobates</i> spp.	Appendix II:Précédemment inscrit sous <i>Dendrobates</i> spp.		Appendix II:	Dendrobates histrionicus sylvaticus (Funkhouser, 1956), Dendrobates sylvaticus (Stuart, Hoffmann, Chanson, Cox, Berridge, Ramani, and Young, 2008), Oophaga sylvatica Grant, Frost, Caldwell, Gagliardo, Haddad, Kok, Means, Noonan, Schargel & Wheeler, 2006, Dendrobates dendrobates histrionicus (Berthold, 1845)		Diablito		true	CO, EC	Colombia, Ecuador	Colombia, Ecuador
9900	Animalia	Chordata	Amphibia	Anura	Dendrobatidae	Oophaga	vicentei		Oophaga vicentei	(Jungfer, Weygoldt & Juraske, 1996)	SPECIES	II	Appendix II:Formerly included in <i>Dendrobates</i> spp., prior to taxonomic change adopted at CoP16.	Appendix II:Formerly included in <i>Dendrobates</i> spp.	Appendix II:Anteriormente incluida en <i>Dendrobates</i> spp.	Appendix II:Précédemment inscrit sous <i>Dendrobates</i> spp.		Appendix II:	Oophaga vicentei Grant, Frost, Caldwell, Gagliardo, Haddad, Kok, Means, Noonan, Schargel & Wheeler, 2006, Dendrobates vicentei Jungfer, Weygoldt & Juraske, 1996	Vicente's poison frog			true	PA	Panama	Panama
2624	Animalia	Chordata	Amphibia	Caudata	Salamandridae	Paramesotriton			Paramesotriton	Chang, 1935	GENUS	II	Appendix II:	Appendix II:	Appendix II:	Appendix II:		Appendix II:					true
98236	Animalia	Chordata	Amphibia	Caudata	Salamandridae	Paramesotriton	aurantius		Paramesotriton aurantius	Yuan, Wu, Zhou, and Che, 2016	SPECIES	II	Appendix II:	Appendix II:	Appendix II:	Appendix II:		Appendix II:		Orange colored warty newt			true	CN	China	China
7679	Animalia	Chordata	Amphibia	Caudata	Salamandridae	Paramesotriton	caudopunctatus		Paramesotriton caudopunctatus	(Liu & Hu, 1973)	SPECIES	II	Appendix II:	Appendix II:	Appendix II:	Appendix II:		Appendix II:		Guizhou Warty Newt, Spot-tailed Warty Newt			false	CN	China	China
6464	Animalia	Chordata	Amphibia	Caudata	Salamandridae	Paramesotriton	chinensis		Paramesotriton chinensis	(Gray, 1859)	SPECIES	II	Appendix II:	Appendix II:	Appendix II:	Appendix II:		Appendix II:		Chinese Warty Newt			false	CN	China	China
9037	Animalia	Chordata	Amphibia	Caudata	Salamandridae	Paramesotriton	deloustali		Paramesotriton deloustali	(Bourret, 1934)	SPECIES	II	Appendix II:	Appendix II:	Appendix II:	Appendix II:		Appendix II:	Mesotriton deloustali Bourret, 1934	Tam Dao Salamander, Vietnamese Salamander, Vietnamese Warty Newt, Vietnam warty newt, Viet Nam warty newt			false	CN, VN	China, Viet Nam	Viet Nam						China
8482	Animalia	Chordata	Amphibia	Caudata	Salamandridae	Paramesotriton	fuzhongensis		Paramesotriton fuzhongensis	Wen, 1989	SPECIES	II	Appendix II:	Appendix II:	Appendix II:	Appendix II:		Appendix II:		Fuzhong warty newt, Wanggao Warty Newt			false	CN	China	China
68364	Animalia	Chordata	Amphibia	Caudata	Salamandridae	Paramesotriton	guangxiensis		Paramesotriton guangxiensis	Huang, Tang and Tang, 1983	SPECIES	II	Appendix II:	Appendix II:	Appendix II:	Appendix II:		Appendix II:	Paramesotriton guanxiensis (Huang, Tang & Tang, 1983)	Guangxi Warty Newt			true	CN, VN	China, Viet Nam	China, Viet Nam
54323	Animalia	Chordata	Amphibia	Caudata	Salamandridae	Paramesotriton	hongkongensis		Paramesotriton hongkongensis	Myers and Leviton, 1962	SPECIES	II	Appendix II:	Appendix II:Included in <i>Paramesotriton</i> spp.	Appendix II:Incluida en <i>Paramesotriton</i> spp.	Appendix II:Inscrit sous <i>Paramesotriton</i> spp.		Appendix II:	Paramesotriton hongkongensis Dubois and Raffaëlli, 2009, Trituroides hongkongensis Myers and Leviton, 1962, Paramesotriton chinensis hongkongensis Fei, Ye and Huang, 1990, Paramesotriton hongkongensis Freytag, 1962	Hong Kong Newt, Hong Kong warty newt			false	CN, HK	China, Hong Kong, SAR	China, Hong Kong, SAR
10232	Animalia	Chordata	Amphibia	Caudata	Salamandridae	Paramesotriton	labiatus		Paramesotriton labiatus	(Unterstein, 1930)	SPECIES	II	Appendix II:	Appendix II:	Appendix II:	Appendix II:		Appendix II:	Pachytriton labiatus (Unterstein, 1930)	Ermi Zhao warty newt, Spotless Smooth warty newt, Unterstein's Newt			false	CN	China	China
54324	Animalia	Chordata	Amphibia	Caudata	Salamandridae	Paramesotriton	longliensis		Paramesotriton longliensis	Li, Tian, Gu, and Xiong, 2008	SPECIES	II	Appendix II:	Appendix II:	Appendix II:	Appendix II:		Appendix II:		Longli warty newt			false	CN	China	China
54325	Animalia	Chordata	Amphibia	Caudata	Salamandridae	Paramesotriton	maolanensis		Paramesotriton maolanensis	Gu, Chen, Tian, Li, and Ran, 2012	SPECIES	II	Appendix II:	Appendix II:	Appendix II:	Appendix II:		Appendix II:		Maolan warty newt			false	CN	China	China
68019	Animalia	Chordata	Amphibia	Caudata	Salamandridae	Paramesotriton	qixilingensis		Paramesotriton qixilingensis	Yan, Zhao, Jiang, Hou, He, Murphy, and Che, 2014	SPECIES	II	Appendix II:	Appendix II:	Appendix II:	Appendix II:		Appendix II:		Qixiling warty newt			true	CN	China	China
68020	Animalia	Chordata	Amphibia	Caudata	Salamandridae	Paramesotriton	wulingensis		Paramesotriton wulingensis	Wang, Tian, and Gu, 2013	SPECIES	II	Appendix II:	Appendix II:	Appendix II:	Appendix II:		Appendix II:		Wulin warty newt			true	CN	China	China
54326	Animalia	Chordata	Amphibia	Caudata	Salamandridae	Paramesotriton	yunwuensis		Paramesotriton yunwuensis	Wu, Jiang, and Hanken, 2010	SPECIES	II	Appendix II:	Appendix II:	Appendix II:	Appendix II:		Appendix II:		Yunwu warty newt			false	CN	China	China
54327	Animalia	Chordata	Amphibia	Caudata	Salamandridae	Paramesotriton	zhijinensis		Paramesotriton zhijinensis	Li, Tian, and Gu, 2008	SPECIES	II	Appendix II:	Appendix II:	Appendix II:	Appendix II:		Appendix II:		Zhijin warty newt			false	CN	China	China
2311	Animalia	Chordata	Amphibia	Anura	Dendrobatidae	Phyllobates			Phyllobates	Bibron, 1841	GENUS	II	Appendix II:	Appendix II:	Appendix II:	Appendix II:		Appendix II:					true
11170	Animalia	Chordata	Amphibia	Anura	Dendrobatidae	Phyllobates	aurotaenia		Phyllobates aurotaenia	(Boulenger, 1913)	SPECIES	II	Appendix II:	Appendix II:	Appendix II:	Appendix II:		Appendix II:	Phyllobates aurotaenia Dunn, 1957, Dendrobates aurotaenia Boulenger, 1913, Phyllobates (phyllobates) aurotaenia Bauer, 1988	Kokoe Poison Frog		Phyllobate à bande dorée	true	CO	Colombia	Colombia
10176	Animalia	Chordata	Amphibia	Anura	Dendrobatidae	Phyllobates	bicolor		Phyllobates bicolor	Duméril & Bibron, 1841	SPECIES	II	Appendix II:	Appendix II:	Appendix II:	Appendix II:		Appendix II:	Phyllobates nicefori Noble, 1923, Phyllobates melanorrhinus Berthold, 1845, Dendrobates tinctorius var. chocoensis Boulenger, 1913, Phyllobates chocoensis Posada Arango, 1869, Phyllobates melanorhinus Gorham, 1963	Black-legged poison dart frog, Black-legged Poison Frog, Two-toned Poison Frog	Rana kokoi amarilla	Phyllobate bicolore	true	CO	Colombia	Colombia
4099	Animalia	Chordata	Amphibia	Anura	Dendrobatidae	Phyllobates	lugubris		Phyllobates lugubris	(O. Schmidt, 1857)	SPECIES	II	Appendix II:	Appendix II:	Appendix II:	Appendix II:		Appendix II:	Dendrobates lugubris Werner, 1901, Dendrobates lugubris Dunn, 1940, Hylaplesia lugubris (Schmidt, 1857), Phyllobates lugubris Dunn, 1924, Phyllobates beatriciae Barbour & Dunn, 1921, Hylaplesia lugubris Brocchi, 1882, Dendrobates lugubris Schmidt, 1857	Lovely poison-arrow frog, Lovely Poison Frog	Rana de punta de flecha lúgubre	Phyllobate lugubre	true	CR, NI, PA	Costa Rica, Nicaragua, Panama	Costa Rica, Nicaragua, Panama
4544	Animalia	Chordata	Amphibia	Anura	Dendrobatidae	Phyllobates	terribilis		Phyllobates terribilis	Myers, Daly & Malkin, 1978	SPECIES	II	Appendix II:	Appendix II:	Appendix II:	Appendix II:		Appendix II:		Golden Poison Frog	Rana de punta de flecha terrible	Phyllobate terrible	true	CO	Colombia	Colombia
6947	Animalia	Chordata	Amphibia	Anura	Dendrobatidae	Phyllobates	vittatus		Phyllobates vittatus	(Cope, 1893)	SPECIES	II	Appendix II:	Appendix II:	Appendix II:	Appendix II:		Appendix II:	Phyllobates vittatus Silverstone, 1975, Dendrobates tinctorius vittatus (Schneider, 1799), Dendrobates tinctorius vittatus Cope, 1893	Golfodulcean poison-arrow frog, Golfodulcean Poison Frog, Orange-and-black Poison Frog	Rana de punta de flecha rayada	Phyllobate à bande	true	CR, PA	Costa Rica, Panama	Costa Rica						Panama
2610	Animalia	Chordata	Amphibia	Anura	Dendrobatidae	Ranitomeya			Ranitomeya	Bauer, 1988	GENUS	II	Appendix II:Formerly included in <i>Dendrobates</i> spp., prior to taxonomic change adopted at CoP16.	Appendix II:Formerly included in <i>Dendrobates</i> spp.	Appendix II:Anteriormente incluida en <i>Dendrobates</i> spp.	Appendix II:Précédemment inscrit sous <i>Dendrobates</i> spp.		Appendix II:					true
7932	Animalia	Chordata	Amphibia	Anura	Dendrobatidae	Ranitomeya	amazonica		Ranitomeya amazonica	(Schulte, 1999)	SPECIES	II	Appendix II:Formerly included in <i>Dendrobates</i> spp., prior to taxonomic change adopted at CoP16.	Appendix II:Formerly included in <i>Dendrobates</i> spp.	Appendix II:Anteriormente incluida en <i>Dendrobates</i> spp.	Appendix II:Précédemment inscrit sous <i>Dendrobates</i> spp.		Appendix II:	Dendrobates amazonicus Schulte, 1999, Ranitomeya amazonica Grant, Frost, Caldwell, Gagliardo, Haddad, Kok, Means, Noonan, Schargel & Wheeler, 2006				true	PE	Peru	Peru
10459	Animalia	Chordata	Amphibia	Anura	Dendrobatidae	Ranitomeya	benedicta		Ranitomeya benedicta	Brown, Twomey, Pepper & Sanchez-Rodriguez, 2008	SPECIES	II	Appendix II:Formerly included in <i>Dendrobates</i> spp., prior to taxonomic change adopted at CoP16.	Appendix II:Formerly included in <i>Dendrobates</i> spp.	Appendix II:Anteriormente incluida en <i>Dendrobates</i> spp.	Appendix II:Précédemment inscrit sous <i>Dendrobates</i> spp.		Appendix II:		Blessed poison frog			true	PE	Peru	Peru
10198	Animalia	Chordata	Amphibia	Anura	Dendrobatidae	Ranitomeya	cyanovittata		Ranitomeya cyanovittata	Perez Peña, Chavez, Twomey & Brown, 2010	SPECIES	II	Appendix II:Formerly included in <i>Dendrobates</i> spp., prior to taxonomic change adopted at CoP16.	Appendix II:Formerly included in <i>Dendrobates</i> spp.	Appendix II:Anteriormente incluida en <i>Dendrobates</i> spp.	Appendix II:Précédemment inscrit sous <i>Dendrobates</i> spp.		Appendix II:					true	PE	Peru	Peru
9844	Animalia	Chordata	Amphibia	Anura	Dendrobatidae	Ranitomeya	defleri		Ranitomeya defleri	Twomey & Brown, 2009	SPECIES	II	Appendix II:Formerly included in <i>Dendrobates</i> spp., prior to taxonomic change adopted at CoP16.	Appendix II:Formerly included in <i>Dendrobates</i> spp.	Appendix II:Anteriormente incluida en <i>Dendrobates</i> spp.	Appendix II:Précédemment inscrit sous <i>Dendrobates</i> spp.		Appendix II:					true	CO	Colombia	Colombia
10385	Animalia	Chordata	Amphibia	Anura	Dendrobatidae	Ranitomeya	fantastica		Ranitomeya fantastica	(Boulenger, 1884 "1883")	SPECIES	II	Appendix II:Formerly included in <i>Dendrobates</i> spp., prior to taxonomic change adopted at CoP16.	Appendix II:Formerly included in <i>Dendrobates</i> spp.	Appendix II:Anteriormente incluida en <i>Dendrobates</i> spp.	Appendix II:Précédemment inscrit sous <i>Dendrobates</i> spp.		Appendix II:	Dendrobates fantasticus Boulenger, 1884 "1883", Ranitomeya fantastica Bauer, 1988, Ranitomeya fantasticus Anonymous, 1985, Dendrobates phantasticus Werner, 1901	Fantastic poison frog, Red-headed Poison Frog	Rana de punta de flecha fantástica, Rana venenosa	Dendrobate fantastique	true	PE	Peru	Peru
6127	Animalia	Chordata	Amphibia	Anura	Dendrobatidae	Ranitomeya	flavovittata		Ranitomeya flavovittata	(Schulte, 1999)	SPECIES	II	Appendix II:Formerly included in <i>Dendrobates</i> spp., prior to taxonomic change adopted at CoP16.	Appendix II:Formerly included in <i>Dendrobates</i> spp.	Appendix II:Anteriormente incluida en <i>Dendrobates</i> spp.	Appendix II:Précédemment inscrit sous <i>Dendrobates</i> spp.		Appendix II:	Dendrobates flavovittatus Schulte, 1999, Ranitomeya flavovittata Grant, Frost, Caldwell, Gagliardo, Haddad, Kok, Means, Noonan, Schargel & Wheeler, 2006				true	PE	Peru	Peru
9925	Animalia	Chordata	Amphibia	Anura	Dendrobatidae	Ranitomeya	imitator		Ranitomeya imitator	(Schulte, 1986)	SPECIES	II	Appendix II:Formerly included in <i>Dendrobates</i> spp., prior to taxonomic change adopted at CoP16.	Appendix II:Formerly included in <i>Dendrobates</i> spp.	Appendix II:Anteriormente incluida en <i>Dendrobates</i> spp.	Appendix II:Précédemment inscrit sous <i>Dendrobates</i> spp.		Appendix II:	Dendrobates imitator yurimaguensis Schulte, 1999, Ranitomeya intermedia Grant, Frost, Caldwell, Gagliardo, Haddad, Kok, Means, Noonan, Schargel & Wheeler, 2006, Ranitomeya imitator Brown, Twomey, Amézquita, Barbosa de Souza, Caldwell, Lötters, von May, Melo-Sampaio, Mejía-Vargas, Perez-Peña, Pepper, Sanchez-Rodriguez & Summers, 2011, Dendrobates imitator Schulte, 1986, Ranitomeya imitator Bauer, …	Mimic Poison Frog	Rana venenosa	Dendrobate imitateur	true	PE	Peru	Peru
3498	Animalia	Chordata	Amphibia	Anura	Dendrobatidae	Ranitomeya	reticulata		Ranitomeya reticulata	(Boulenger, 1884)	SPECIES	II	Appendix II:Formerly included in <i>Dendrobates</i> spp., prior to taxonomic change adopted at CoP16.	Appendix II:Formerly included in <i>Dendrobates</i> spp.	Appendix II:Anteriormente incluida en <i>Dendrobates</i> spp.	Appendix II:Précédemment inscrit sous <i>Dendrobates</i> spp.		Appendix II:	Ranitomeya reticulata Brown, Twomey, Amézquita, Barbosa de Souza, Caldwell, Lötters, von May, Melo-Sampaio, Mejía-Vargas, Perez-Peña, Pepper, Sanchez-Rodriguez & Summers, 2011, Dendrobates reticulatus Boulenger, 1884 "1883", Ranitomeya ignea (Melin, 1941), Ranitomeya reticulata Bauer, 1986, Ranitomeya ignea Grant, Frost, Caldwell, Gagliardo, Haddad, Kok, Means, Noonan, Schargel & Wheeler, 2006, D…	Red-backed Poison Frog, Redback poison frog, Reticulated Poison Frog	Rana de punta de flecha reticulada, Rana venenosa rojiza	Dendrobate réticulé	true	CO, EC, PE	Colombia, Ecuador, Peru	Ecuador, Peru						Colombia
7714	Animalia	Chordata	Amphibia	Anura	Dendrobatidae	Ranitomeya	sirensis		Ranitomeya sirensis	(Aichinger, 1991)	SPECIES	II	Appendix II:Formerly included in <i>Dendrobates</i> spp., prior to taxonomic change adopted at CoP16.	Appendix II:Formerly included in <i>Dendrobates</i> spp.	Appendix II:Anteriormente incluida en <i>Dendrobates</i> spp.	Appendix II:Précédemment inscrit sous <i>Dendrobates</i> spp.		Appendix II:	Dendrobates lamasi Morales, 1992, Ranitomeya lamasi Grant, Frost, Caldwell, Gagliardo, Haddad, Kok, Means, Noonan, Schargel & Wheeler, 2006, Ranitomeya biolat (Morales, 1992), Ranitomeya sirensis Grant, Frost, Caldwell, Gagliardo, Haddad, Kok, Means, Noonan, Schargel & Wheeler, 2006, Dendrobates sirensis Aichinger, 1991, Ranitomeya ranitomeya lamasi (Morales, 1992), Dendrobates biolat Morales, 19…	Biolat Poison Frog, Sira poison frog		Dendrobate biolat	true	BO, BR, PE	Bolivia (Plurinational State of), Brazil, Peru	Bolivia (Plurinational State of), Brazil, Peru
8762	Animalia	Chordata	Amphibia	Anura	Dendrobatidae	Ranitomeya	summersi		Ranitomeya summersi	Brown, Twomey, Pepper & Sanchez-Rodriguez, 2008	SPECIES	II	Appendix II:Formerly included in <i>Dendrobates</i> spp., prior to taxonomic change adopted at CoP16.	Appendix II:Formerly included in <i>Dendrobates</i> spp.	Appendix II:Anteriormente incluida en <i>Dendrobates</i> spp.	Appendix II:Précédemment inscrit sous <i>Dendrobates</i> spp.		Appendix II:		Summers' poison frog			true	PE	Peru	Peru
9782	Animalia	Chordata	Amphibia	Anura	Dendrobatidae	Ranitomeya	toraro		Ranitomeya toraro	Twomey, Melo-Sampaio & Souza, 2011	SPECIES	II	Appendix II:Formerly included in <i>Dendrobates</i> spp., prior to taxonomic change adopted at CoP16.	Appendix II:Formerly included in <i>Dendrobates</i> spp.	Appendix II:Anteriormente incluida en <i>Dendrobates</i> spp.	Appendix II:Précédemment inscrit sous <i>Dendrobates</i> spp.		Appendix II:	Ranitomeya toraro Brown, Twomey, Amézquita, Barbosa de Souza, Caldwell, Lötters, von May, Melo-Sampaio, Mejía-Vargas, Perez-Peña, Pepper, Sanchez-Rodriguez & Summers, 2011				true	BR, CO, PE	Brazil, Colombia, Peru	Brazil, Colombia						Peru
4080	Animalia	Chordata	Amphibia	Anura	Dendrobatidae	Ranitomeya	uakarii		Ranitomeya uakarii	(Brown, Schulte & Summers, 2006)	SPECIES	II	Appendix II:Formerly included in <i>Dendrobates</i> spp., prior to taxonomic change adopted at CoP16.	Appendix II:Formerly included in <i>Dendrobates</i> spp.	Appendix II:Anteriormente incluida en <i>Dendrobates</i> spp.	Appendix II:Précédemment inscrit sous <i>Dendrobates</i> spp.		Appendix II:	Ranitomeya uakarii Frost, 2007, Dendrobates uakarii Brown, Schulte & Summers, 2006				true	BO, BR, CO, GY, PE	Bolivia (Plurinational State of), Brazil, Colombia, Guyana, Peru	Brazil, Colombia, Guyana, Peru						Bolivia (Plurinational State of)
4707	Animalia	Chordata	Amphibia	Anura	Dendrobatidae	Ranitomeya	vanzolinii		Ranitomeya vanzolinii	(Myers, 1982)	SPECIES	II	Appendix II:Formerly included in <i>Dendrobates</i> spp., prior to taxonomic change adopted at CoP16.	Appendix II:Formerly included in <i>Dendrobates</i> spp.	Appendix II:Anteriormente incluida en <i>Dendrobates</i> spp.	Appendix II:Précédemment inscrit sous <i>Dendrobates</i> spp.		Appendix II:	Ranitomeya vanzolinii Bauer, 1988, Dendrobates vanzolinii Myers, 1982	Brazilian Poison Frog	Rana de punta de flecha de Vanzolini	Dendrobate de Vanzolini	true	BR, PE	Brazil, Peru	Brazil, Peru
7458	Animalia	Chordata	Amphibia	Anura	Dendrobatidae	Ranitomeya	variabilis		Ranitomeya variabilis	(Zimmermann & Zimmermann, 1988)	SPECIES	II	Appendix II:Formerly included in <i>Dendrobates</i> spp., prior to taxonomic change adopted at CoP16.	Appendix II:Formerly included in <i>Dendrobates</i> spp.	Appendix II:Anteriormente incluida en <i>Dendrobates</i> spp.	Appendix II:Précédemment inscrit sous <i>Dendrobates</i> spp.		Appendix II:	Dendrobates variabilis Zimmermann & Zimmermann, 1988, Ranitomeya variabilis Grant, Frost, Caldwell, Gagliardo, Haddad, Kok, Means, Noonan, Schargel & Wheeler, 2006	Zimmermann's Poison Frog	Rana de punta de flecha variable	Dendrobate variable	true	BR, PE	Brazil, Peru	Brazil, Peru
3980	Animalia	Chordata	Amphibia	Anura	Dendrobatidae	Ranitomeya	ventrimaculata		Ranitomeya ventrimaculata	(Shreve, 1935)	SPECIES	II	Appendix II:Formerly included in <i>Dendrobates</i> spp., prior to taxonomic change adopted at CoP16.	Appendix II:Formerly included in <i>Dendrobates</i> spp.	Appendix II:Anteriormente incluida en <i>Dendrobates</i> spp.	Appendix II:Précédemment inscrit sous <i>Dendrobates</i> spp.		Appendix II:	Ranitomeya ventrimaculata Brown, Twomey, Amézquita, Barbosa de Souza, Caldwell, Lötters, von May, Melo-Sampaio, Mejía-Vargas, Perez-Peña, Pepper, Sanchez-Rodriguez & Summers, 2011, Ranitomeya duellmani Grant, Frost, Caldwell, Gagliardo, Haddad, Kok, Means, Noonan, Schargel & Wheeler, 2006, Dendrobates duellmani Schulte, 1999, Dendrobates minutus ventrimaculatus Shreve, 1935, Dendrobates ventrimac…	Amazonian Poison Frog		Dendrobate au ventre tacheté	true	BR, CO, EC, GF, PE, SR	Brazil, Colombia, Ecuador, French Guiana [FR], Peru, Suriname	Brazil, Colombia, Ecuador, French Guiana [FR], Peru, Suriname
7407	Animalia	Chordata	Amphibia	Anura	Dendrobatidae	Ranitomeya	yavaricola		Ranitomeya yavaricola	Perez Peña, Chavez, Twomey & Brown, 2010	SPECIES	II	Appendix II:Formerly included in <i>Dendrobates</i> spp., prior to taxonomic change adopted at CoP16.	Appendix II:Formerly included in <i>Dendrobates</i> spp.	Appendix II:Anteriormente incluida en <i>Dendrobates</i> spp.	Appendix II:Précédemment inscrit sous <i>Dendrobates</i> spp.		Appendix II:					true	BR, PE	Brazil, Peru	Peru						Brazil
737	Animalia	Chordata	Amphibia	Anura	Myobatrachidae	Rheobatrachus			Rheobatrachus	Liem, 1973	GENUS	II/NC	Appendix II:Except <i>Rheobatrachus silus</i> and <i>Rheobatrachus vitellinus<i>.	Appendix II:Except <i>Rheobatrachus silus</i> and <i>Rheobatrachus vitellinus<i>.	Appendix II:Excepto <i>Rheobatrachus silus</i> y <i>Rheobatrachus vitellinus</i>.	Appendix II:Sauf <i>Rheobatrachus silus</i> et <i>Rheobatrachus vitellinus</i>.		Appendix II:					true
4125	Animalia	Chordata	Amphibia	Anura	Myobatrachidae	Rheobatrachus	silus		Rheobatrachus silus	Liem, 1973	SPECIES	NC								Conondale Gastric-brooding Frog, Southern gastric brooding frog, Southern Platypus Frog		Grenouille plate à incubation gastrique	true	AU	Australia					Australia	Australia
4549	Animalia	Chordata	Amphibia	Anura	Myobatrachidae	Rheobatrachus	vitellinus		Rheobatrachus vitellinus	Mahony, Tyler & Davies, 1984	SPECIES	NC								Eungella Gastric-brooding Frog, Northern gastric brooding frog, Northern Gastric-brooding Frog, Northern Platypus Frog			true	AU	Australia					Australia
8686	Animalia	Chordata	Amphibia	Caudata	Salamandridae	Salamandra	algira		Salamandra algira	Bedriaga, 1883	SPECIES	III	Appendix III:	Appendix III:	Appendix III:	Appendix III:		Appendix III:		North african fire salamander	Salamandra norteafricana	Salamandre algire	false	DZ, MA, ES, TN	Algeria, Morocco, Spain, Tunisia	Algeria, Morocco, Spain						Tunisia
67982	Animalia	Chordata	Amphibia	Anura	Microhylidae	Scaphiophryne	boribory		Scaphiophryne boribory	Vences, Raxworthy, Nussbaum, and Glaw, 2003	SPECIES	II	Appendix II:	Appendix II:	Appendix II:	Appendix II:		Appendix II:	Scaphiophryne boribory Grosjean, Glos, Teschke, Glaw and Vences, 2007				true	MG	Madagascar	Madagascar
3932	Animalia	Chordata	Amphibia	Anura	Microhylidae	Scaphiophryne	gottlebei		Scaphiophryne gottlebei	Busse & Böhme, 1992	SPECIES	II	Appendix II:	Appendix II:	Appendix II:	Appendix II:		Appendix II:	Scaphiophryne (scaphiophryne) gottlebei Grosjean, Glos, Teschke, Glaw & Vences, 2007	Gottlebe's narrow-mouthed frog, Malagasy rainbow frog, Red Rain Frog			true	MG	Madagascar	Madagascar
67981	Animalia	Chordata	Amphibia	Anura	Microhylidae	Scaphiophryne	marmorata		Scaphiophryne marmorata	Boulenger, 1882	SPECIES	II	Appendix II:	Appendix II:	Appendix II:	Appendix II:		Appendix II:	Scaphiophryne marmorata Blommers-Schlösser and Blanc, 1991, Scaphiophryne marmorata Grosjean, Glos, Teschke, Glaw and Vences, 2007	Marbled rain frog			true	MG	Madagascar	Madagascar
67984	Animalia	Chordata	Amphibia	Anura	Microhylidae	Scaphiophryne	spinosa		Scaphiophryne spinosa	Steindachner, 1882	SPECIES	II	Appendix II:	Appendix II:	Appendix II:	Appendix II:		Appendix II:	Scaphiophryne spinosa Grosjean, Glos, Teschke, Glaw and Vences, 2007				true	MG	Madagascar	Madagascar
68002	Animalia	Chordata	Amphibia	Anura	Telmatobiidae	Telmatobius	culeus		Telmatobius culeus	Garman, 1876	SPECIES	I	Appendix I:	Appendix I:	Appendix I:	Appendix I:		Appendix I:	Telmatobius escomeli exsul Vellard, 1951, Telmatobius culeus lacustris Vellard, 1992, Telmatobius albiventris globulosus Vellard, 1960, Telmatobius culeus globulosus Vellard, 1992, Telmatobius albiventris punensis Vellard, 1960, Telmatobius albiventris albiventris Vellard, 1960, Telmatobius albiventris albiventris Vellard, 1951, Telmatobius crawfordi crawfordi Vellard, 1953, Telmatobius culeus al…	Crawford's Water Frog, Lake Titicaca frog, Titicaca water frog, White Water Frog	Rana del lago titicaca, Rana gigante del lago Titicaca, Rana gigante del Titicaca		true	BO, PE	Bolivia (Plurinational State of), Peru	Bolivia (Plurinational State of), Peru
793	Animalia	Chordata	Amphibia	Caudata	Salamandridae	Tylototriton			Tylototriton	Anderson, 1871	GENUS	II	Appendix II:	Appendix II:	Appendix II:	Appendix II:		Appendix II:		Crocodile Newts, Knobby Newts		Triton crocodile	true
68021	Animalia	Chordata	Amphibia	Caudata	Salamandridae	Tylototriton	anguliceps		Tylototriton anguliceps	Le, Nguyen, Nishikawa, Nguyen, Pham, Matsui, Bernardes, and Nguyen, 2015	SPECIES	II	Appendix II:	Appendix II:	Appendix II:	Appendix II:		Appendix II:		Angular-headed newt			true	CN, LA, TH, VN	China, Lao People's Democratic Republic, Thailand, Viet Nam	China, Lao People's Democratic Republic, Thailand, Viet Nam
98237	Animalia	Chordata	Amphibia	Caudata	Salamandridae	Tylototriton	anhuiensis		Tylototriton anhuiensis	Qian, Sun, Li, Guo, Pan, Kang, Wang, Jiang, Wu and Zhang, 2017	SPECIES	II	Appendix II:	Appendix II:	Appendix II:	Appendix II:		Appendix II:					true	CN	China	China
3203	Animalia	Chordata	Amphibia	Caudata	Salamandridae	Tylototriton	asperrimus		Tylototriton asperrimus	(Unterstein, 1930)	SPECIES	II	Appendix II:	Appendix II:	Appendix II:	Appendix II:		Appendix II:	Echinotriton asperrimus (Unterstein, 1930)	Black Knobby Newt, Granular newt, Mount Yao Newt			false	CN, VN	China, Viet Nam	China, Viet Nam
54328	Animalia	Chordata	Amphibia	Caudata	Salamandridae	Tylototriton	broadoridgus		Tylototriton broadoridgus	Shen, Jiang, and Mo, 2012	SPECIES	II	Appendix II:	Appendix II:	Appendix II:	Appendix II:		Appendix II:		Sangzhi Crocodile Newt			false	CN	China	China
54329	Animalia	Chordata	Amphibia	Caudata	Salamandridae	Tylototriton	dabienicus		Tylototriton dabienicus	Chen, Wang, and Tao, 2010	SPECIES	II	Appendix II:	Appendix II:	Appendix II:	Appendix II:		Appendix II:		Dabie Mountain Crocodile Newt			false	CN	China	China
7984	Animalia	Chordata	Amphibia	Caudata	Salamandridae	Tylototriton	hainanensis		Tylototriton hainanensis	Fei & Yang, 1984	SPECIES	II	Appendix II:	Appendix II:	Appendix II:	Appendix II:		Appendix II:		Hainan Knobby Newt			false	CN	China	China
98240	Animalia	Chordata	Amphibia	Caudata	Salamandridae	Tylototriton	himalayanus		Tylototriton himalayanus	Khatiwada, Wang, Ghimire, Vasudevan, Paudel and Jiang, 2015	SPECIES	II	Appendix II:	Appendix II:	Appendix II:	Appendix II:		Appendix II:					true	IN, NP	India, Nepal	India, Nepal
10231	Animalia	Chordata	Amphibia	Caudata	Salamandridae	Tylototriton	kweichowensis		Tylototriton kweichowensis	Fang & Chang, 1932	SPECIES	II	Appendix II:	Appendix II:	Appendix II:	Appendix II:		Appendix II:		Kweichow Crocodile Newt, Red-tailed Knobby Newt			false	CN	China	China
68022	Animalia	Chordata	Amphibia	Caudata	Salamandridae	Tylototriton	liuyangensis		Tylototriton liuyangensis	Yang, Jiang, Shen, and Fei, 2014	SPECIES	II	Appendix II:	Appendix II:	Appendix II:	Appendix II:		Appendix II:		Liuyang Crocodile Newt			true	CN	China	China
54330	Animalia	Chordata	Amphibia	Caudata	Salamandridae	Tylototriton	lizhengchangi		Tylototriton lizhengchangi	Hou, Zhang, Jiang, Li and Lu, 2012	SPECIES	II	Appendix II:	Appendix II:	Appendix II:	Appendix II:		Appendix II:		Mangshan Crocodile Newt			false	CN	China	China
98241	Animalia	Chordata	Amphibia	Caudata	Salamandridae	Tylototriton	ngarsuensis		Tylototriton ngarsuensis	Grismer, Wood, Quah, Thura, Espinoza, Grismer, Murdoch and Lin, 2018	SPECIES	II	Appendix II:	Appendix II:	Appendix II:	Appendix II:		Appendix II:					true	MM	Myanmar	Myanmar
54331	Animalia	Chordata	Amphibia	Caudata	Salamandridae	Tylototriton	notialis		Tylototriton notialis	Stuart, Phimmachak, Sivongxay, and Robichaud, 2010	SPECIES	II	Appendix II:	Appendix II:	Appendix II:	Appendix II:		Appendix II:		Khammouan Crocodile Newt			false	LA, VN	Lao People's Democratic Republic, Viet Nam	Lao People's Democratic Republic, Viet Nam
68023	Animalia	Chordata	Amphibia	Caudata	Salamandridae	Tylototriton	panhai		Tylototriton panhai	Nishikawa, Khonsue, Pomchote, and Matsui, 2013	SPECIES	II	Appendix II:	Appendix II:	Appendix II:	Appendix II:		Appendix II:		Loei Crocodile Newt, Panha's Crocodile Newt			true	LA, TH	Lao People's Democratic Republic, Thailand	Lao People's Democratic Republic, Thailand
98239	Animalia	Chordata	Amphibia	Caudata	Salamandridae	Tylototriton	podichthys		Tylototriton podichthys	Phimmachak, Aowphol, and Stuart, 2015	SPECIES	II	Appendix II:	Appendix II:	Appendix II:	Appendix II:		Appendix II:					true	LA	Lao People's Democratic Republic	Lao People's Democratic Republic
54332	Animalia	Chordata	Amphibia	Caudata	Salamandridae	Tylototriton	pseudoverrucosus		Tylototriton pseudoverrucosus	Hou, Gu, Zhang, Zeng, and Lu, 2012	SPECIES	II	Appendix II:	Appendix II:	Appendix II:	Appendix II:		Appendix II:		Southern Sichuan Crocodile Newt			false	CN	China	China
98238	Animalia	Chordata	Amphibia	Caudata	Salamandridae	Tylototriton	pulcherrimus		Tylototriton pulcherrimus	Hou, Zhang, Li, and Lu, 2012	SPECIES	II	Appendix II:	Appendix II:	Appendix II:	Appendix II:		Appendix II:					true	CN	China	China
54321	Animalia	Chordata	Amphibia	Caudata	Salamandridae	Tylototriton	shanjing		Tylototriton shanjing	(Nussbaum, Brodie & Yang, 1995)	SPECIES	II	Appendix II:	Appendix II:	Appendix II:	Appendix II:		Appendix II:		Crocodile Newt, Himalayan Salamander			true	CN, LA, MM, TH	China, Lao People's Democratic Republic, Myanmar, Thailand	China, Thailand						Lao People's Democratic Republic, Myanmar
68026	Animalia	Chordata	Amphibia	Caudata	Salamandridae	Tylototriton	shanorum		Tylototriton shanorum	Nishikawa, Matsui, and Rao, 2014	SPECIES	II	Appendix II:	Appendix II:	Appendix II:	Appendix II:		Appendix II:		Taunggyi Crocodile Newt			true	MM	Myanmar	Myanmar
68024	Animalia	Chordata	Amphibia	Caudata	Salamandridae	Tylototriton	uyenoi		Tylototriton uyenoi	Khonsue, Pomchote, and Matsui, 2013	SPECIES	II	Appendix II:	Appendix II:	Appendix II:	Appendix II:		Appendix II:		Chiang Mai Crocodile Newt, Uéno's Crocodile Newt			true	TH	Thailand	Thailand
10152	Animalia	Chordata	Amphibia	Caudata	Salamandridae	Tylototriton	verrucosus		Tylototriton verrucosus	Anderson, 1871	SPECIES	II	Appendix II:	Appendix II:	Appendix II:	Appendix II:		Appendix II:		Crocodile Newt, Crocodile salamander, Himalayan newt, Himalayan Salamander, Red knobby newt			false	BT, CN, IN, TH	Bhutan, China, India, Thailand	Bhutan, China, India, Thailand
3300	Animalia	Chordata	Amphibia	Caudata	Salamandridae	Tylototriton	vietnamensis		Tylototriton vietnamensis	Böhme, Schöttler, Nguyen & Köhler, 2005	SPECIES	II	Appendix II:	Appendix II:	Appendix II:	Appendix II:		Appendix II:		Vietnamese Crocodile Newt			false	CN, VN	China, Viet Nam	China, Viet Nam
9686	Animalia	Chordata	Amphibia	Caudata	Salamandridae	Tylototriton	wenxianensis		Tylototriton wenxianensis	Fei, Ye & Yang, 1984	SPECIES	II	Appendix II:	Appendix II:	Appendix II:	Appendix II:		Appendix II:		Wenxian Knobby Newt			false	CN	China	China
65401	Animalia	Chordata	Amphibia	Caudata	Salamandridae	Tylototriton	yangi		Tylototriton yangi	Hou, Zhang, Zhou, Li, and Lu, 2012	SPECIES	II	Appendix II:	Appendix II:	Appendix II:	Appendix II:		Appendix II:	Tylototriton daweishanensis Nishikawa et al., 2015	Tiannan Crocodile Newt			true	CN	China	China
68025	Animalia	Chordata	Amphibia	Caudata	Salamandridae	Tylototriton	ziegleri		Tylototriton ziegleri	Nishikawa, Matsui, and Nguyen, 2013	SPECIES	II	Appendix II:	Appendix II:	Appendix II:	Appendix II:		Appendix II:		Ziegler's Crocodile Newt			true	VN	Viet Nam	Viet Nam
