# Supplementary material for: Gaps in global wildlife trade monitoring leave amphibians vulnerable
Source: eLife. 2021 Aug 12;10:e70086. doi: 10.7554/eLife.70086 (PMC8425949; doi:10.7554/eLife.70086)
Supplement: Source data 9. [file elife-70086-data9.csv]

App.	Taxon	Term	Unit	Country	1975	1976	1977	1978	1979	1980	1981	1982	1983	1984	1985	1986	1987	1988	1989	1990	1991	1992	1993	1994	1995	1996	1997	1998	1999	2000	2001	2002	2003	2004	2005	2006	2007	2008	2009	2010	2011	2012	2013	2014	2015	2016	2017	2018	2019
I	Altiphrynoides malcolmi	bodies		GB																		2
I	Altiphrynoides malcolmi	bodies		ZA																				2
I	Amietophrynus superciliaris	bodies		DE																																				1
I	Amietophrynus superciliaris	specimens		CZ																																									17
I	Amietophrynus superciliaris	specimens		US																													1	3
I	Andrias davidianus	bodies		SG														1
I	Andrias davidianus	live		AT							9
I	Andrias davidianus	live		CA																									4
I	Andrias davidianus	live		CN												46	11	6	3	16	32	6	34		2
I	Andrias davidianus	live		CZ																																							35
I	Andrias davidianus	live		DE								7		1										1
I	Andrias davidianus	live		GB				2
I	Andrias davidianus	live		HK							3					46
I	Andrias davidianus	live		JP															4	4
I	Andrias davidianus	live		KR																																					40
I	Andrias davidianus	live		LK								2
I	Andrias davidianus	live		NL							3	4
I	Andrias davidianus	live		SG												1																										4
I	Andrias davidianus	live		TW																																					40
I	Andrias davidianus	live		US								1			1				1			1								1											1						7
I	Andrias davidianus	meat	g	CA																		10
I	Andrias davidianus	specimens	ml	CA																		10
I	Andrias davidianus	specimens		AU																		1
I	Andrias davidianus	specimens		CA																		200
I	Andrias davidianus	specimens		CN																																					1			2	1
I	Andrias davidianus	specimens		GB																																										2	9
I	Andrias davidianus	specimens		KR																																				1			1
I	Andrias davidianus	specimens		US																																									3	1
I	Andrias japonicus	bodies		CH																									1
I	Andrias japonicus	bodies		GB																																	102
I	Andrias japonicus	live		AU										2	2
I	Andrias japonicus	live		CA						4
I	Andrias japonicus	live		DE					2			1	1																														1
I	Andrias japonicus	live		GB												20
I	Andrias japonicus	live		JP											32
I	Andrias japonicus	live		US												30												8	17										13						3
I	Andrias japonicus	live		XX										70
I	Andrias japonicus	skeletons		ES																														1
I	Andrias japonicus	skeletons		US																															1
I	Andrias japonicus	specimens		CA																		100																1
I	Andrias japonicus	specimens		GB																																											2
I	Andrias japonicus	specimens		US																																			1
I	Andrias spp.	bodies		CN															3
I	Andrias spp.	live		CN															2		30			6
I	Andrias spp.	meat		US																																							1
I	Andrias spp.	specimens		US																																		1
I	Atelopus zeteki	bodies		US																																					45	45
I	Atelopus zeteki	live		CA																																					50	50
I	Atelopus zeteki	live		US																		10					10				139	45	40
I	Atelopus zeteki	specimens		CA																																						1
I	Atelopus zeteki	specimens		US																									30					310	200						500
I	Dyscophus antongilii	bodies		DE																													1	100
I	Dyscophus antongilii	live		AT																				15
I	Dyscophus antongilii	live		BR																					52
I	Dyscophus antongilii	live		CA																						6	5	5									2
I	Dyscophus antongilii	live		CH														3	20									32		8		20	18
I	Dyscophus antongilii	live		CZ																								10				17
I	Dyscophus antongilii	live		DE														200					6
I	Dyscophus antongilii	live		DK															20						7
I	Dyscophus antongilii	live		ES																						7
I	Dyscophus antongilii	live		GB															4				3
I	Dyscophus antongilii	live		HU															300
I	Dyscophus antongilii	live		LV																							15
I	Dyscophus antongilii	live		PL																							6	18					8
I	Dyscophus antongilii	live		SE																								6
I	Dyscophus antongilii	live		TH																														10
I	Dyscophus antongilii	live		US															8								10	20			75	2
I	Dyscophus antongilii	specimens	ml	JP																															1
I	Dyscophus antongilii	specimens	ml	US																												0.58	33
I	Dyscophus antongilii	specimens		CA																										1
I	Dyscophus antongilii	specimens		DE																														100	150	100
I	Dyscophus antongilii	specimens		US																															50
I	Dyscophus spp.	live		US																							45
I	Incilius periglenes	live		GB					10
I	Nectophrynoides asperginis	live		TZ																																				100	200	3500	2000		1500	2100	600	2800
I	Nectophrynoides asperginis	specimens		ZA																													4
I	Nectophrynoides cryptus	specimens		IT																												4
I	Nectophrynoides minutus	bodies		GB																4
I	Nectophrynoides minutus	specimens		GB																								3
I	Nectophrynoides minutus	specimens		US																																	1							3
I	Nectophrynoides spp.	bodies		DK							18
I	Nectophrynoides spp.	live		US											6015	20														500													10
I	Nectophrynoides spp.	specimens		TZ																					6
I	Nectophrynoides spp.	specimens		US											18
I	Nectophrynoides spp.	specimens		ZA																														15
I	Nectophrynoides spp.	unspecified		GB										14
I	Nectophrynoides tornieri	bodies		GB																										20
I	Nectophrynoides tornieri	specimens		IT																												4
I	Nectophrynoides tornieri	specimens		TZ																										2
I	Nectophrynoides viviparus	bodies		JE																																14
I	Nectophrynoides viviparus	live		JE																																25
I	Nectophrynoides viviparus	specimens		TZ																										4
I	Nectophrynoides viviparus	specimens		US																											8
I	Nectophrynoides viviparus	specimens		ZA																											8
I	Neurergus kaiseri	live		HR																																						10
I	Neurergus spp.	live		HR																																						10
I	Nimbaphrynoides occidentalis	bodies		DE																																	18	18
I	Nimbaphrynoides occidentalis	specimens		DE																																	350	762	300
I	Telmatobius culeus	live		GB																																													150
II	Adelphobates castaneoticus	live		CA																																											1	1
II	Adelphobates castaneoticus	skin pieces		CO																																						9
II	Adelphobates galactonotus	bodies		AT																						5
II	Adelphobates galactonotus	bodies		AU																																								226
II	Adelphobates galactonotus	bodies		NL																			12	5	7
II	Adelphobates galactonotus	bodies		US																									11
II	Adelphobates galactonotus	derivatives		AU																																								34
II	Adelphobates galactonotus	extract	l	US																																											0.02	0.04
II	Adelphobates galactonotus	live		AU																																12								22
II	Adelphobates galactonotus	live		CA																								25	76				4				14	20	10	12	38						9		13
II	Adelphobates galactonotus	live		CH																																											8
II	Adelphobates galactonotus	live		CN																																											10
II	Adelphobates galactonotus	live		DE																								28	68	20		30	70
II	Adelphobates galactonotus	live		GH																																8
II	Adelphobates galactonotus	live		HU																								8
II	Adelphobates galactonotus	live		JP																							16	30	10	69	23	10	52	19	56	16			6	6	14	16	33	12	27	68	144	60	47
II	Adelphobates galactonotus	live		KR																										15																68	6
II	Adelphobates galactonotus	live		MY																															10														15
II	Adelphobates galactonotus	live		NL																																			3
II	Adelphobates galactonotus	live		PA																																								2
II	Adelphobates galactonotus	live		PH																																					6	20				6		29
II	Adelphobates galactonotus	live		PL																											5
II	Adelphobates galactonotus	live		SG																										12
II	Adelphobates galactonotus	live		TH																														100	100			8
II	Adelphobates galactonotus	live		TW																												20	2		30	7			16	10	20	5		30		18	12	19	26
II	Adelphobates galactonotus	live		US																							100	61	383	244	47		40	42	31		2		157	125	20		15				58
II	Adelphobates galactonotus	live		ZA																												50										10
II	Adelphobates galactonotus	specimens	ml	US																																											20
II	Adelphobates galactonotus	specimens		AT																						4
II	Adelphobates galactonotus	specimens		NL																			12		1
II	Adelphobates galactonotus	specimens		US																																						115
II	Adelphobates quinquevittatus	bodies		NL																			1	1
II	Adelphobates quinquevittatus	bodies		PA																		10
II	Adelphobates quinquevittatus	bodies		US														2				10				1	7	17
II	Adelphobates quinquevittatus	live		CA																							30	41	32	40							4
II	Adelphobates quinquevittatus	live		DE															19
II	Adelphobates quinquevittatus	live		DK														20
II	Adelphobates quinquevittatus	live		HK																			6	6
II	Adelphobates quinquevittatus	live		JP															4				6		26		12	62	30		5		20		10	12		6
II	Adelphobates quinquevittatus	live		NL																30
II	Adelphobates quinquevittatus	live		SE																		6	26	12
II	Adelphobates quinquevittatus	live		SU															8
II	Adelphobates quinquevittatus	live		US																		13	74	190	70	55	147	204	35	90				6
II	Adelphobates quinquevittatus	skin pieces		CO																																						8
II	Adelphobates quinquevittatus	specimens		AT																						1
II	Adelphobates quinquevittatus	specimens		BR																																					2
II	Adelphobates quinquevittatus	specimens		NL																			1
II	Adelphobates quinquevittatus	specimens		US																						7	6	14
II	Agalychnis annae	live		CN																																								28
II	Agalychnis annae	live		JP																																						30
II	Agalychnis annae	live		US																																								15
II	Agalychnis callidryas	bodies		GB																																				4
II	Agalychnis callidryas	bodies		US																																				34			5	1	2
II	Agalychnis callidryas	derivatives		US																																					20
II	Agalychnis callidryas	frog legs		US																																									200
II	Agalychnis callidryas	live		AD																																						300
II	Agalychnis callidryas	live		AE																																				54	20	22	10	12	6	24
II	Agalychnis callidryas	live		AR																																					12	37	80	12
II	Agalychnis callidryas	live		BE																																					500	1000	400	500	700	200	200
II	Agalychnis callidryas	live		BY																																								10
II	Agalychnis callidryas	live		CA																																				1976	1711	3508	2173	570	664	950	1159	1294
II	Agalychnis callidryas	live		CH																																				50	192	277	38		80
II	Agalychnis callidryas	live		CL																																							40	20	10
II	Agalychnis callidryas	live		CN																																							550	15			400
II	Agalychnis callidryas	live		CY																																							1
II	Agalychnis callidryas	live		CZ																																				50	222	155	275	130	220	50	50		50
II	Agalychnis callidryas	live		DE																																						333	300	800	400	300
II	Agalychnis callidryas	live		ES																																				1650	1300	600	300	1600	2000	1900	2023	1997	3033
II	Agalychnis callidryas	live		FR																																				1350	500	1200	125	425	112	25		7
II	Agalychnis callidryas	live		GB																																					242				1531	1100			68
II	Agalychnis callidryas	live		GT																																					6	6					8	8
II	Agalychnis callidryas	live		HK																																				55	130	150	1403	700	600	1960	1700	1100
II	Agalychnis callidryas	live		HU																																							50
II	Agalychnis callidryas	live		ID																																					40	50	10
II	Agalychnis callidryas	live		IS																																									8	8
II	Agalychnis callidryas	live		IT																																					100	450		50
II	Agalychnis callidryas	live		JP																																				74	420	1138	1210	1001	1835	1458	1430	1152	125
II	Agalychnis callidryas	live		KR																																					302	227	278	144	44	177	204	132	89
II	Agalychnis callidryas	live		MO																																						50	50
II	Agalychnis callidryas	live		MX																																				100	182		35	25	20	25
II	Agalychnis callidryas	live		MY																																				50	12	49	30	20	25	12		25
II	Agalychnis callidryas	live		NL																																					175	350	600				250	150
II	Agalychnis callidryas	live		NO																																									5
II	Agalychnis callidryas	live		PH																																					20							4
II	Agalychnis callidryas	live		PR																																						300
II	Agalychnis callidryas	live		RU																																					12	20	20	12			12
II	Agalychnis callidryas	live		SA																																												4
II	Agalychnis callidryas	live		SG																																						500	5
II	Agalychnis callidryas	live		SV																																										200
II	Agalychnis callidryas	live		TH																																					89	326	50	132	20	60	50
II	Agalychnis callidryas	live		TR																																					41	37	24
II	Agalychnis callidryas	live		TW																																				12	16	130	42	37		250	600	200
II	Agalychnis callidryas	live		UA																																				50			25
II	Agalychnis callidryas	live		US																																				18904.597	21144	29092	21530	16314	15607	12616	16622	15536
II	Agalychnis callidryas	live		XX																																										400
II	Agalychnis callidryas	specimens		AR																																					1
II	Agalychnis callidryas	specimens		BE																																											10
II	Agalychnis callidryas	specimens		CN																																								1
II	Agalychnis callidryas	specimens		CO																																						35
II	Agalychnis callidryas	specimens		ES																																											2
II	Agalychnis callidryas	specimens		GB																																				45
II	Agalychnis callidryas	specimens		US																																				72	70	231	57	266	246	3	10	145
II	Agalychnis moreletii	bodies		GB																																				6
II	Agalychnis moreletii	live		US																																								4
II	Agalychnis moreletii	specimens		AR																																					1
II	Agalychnis moreletii	specimens		GB																																				13						69
II	Agalychnis spp.	specimens		US																																							2
II	Agalychnis spurrelli	live		CA																																									3
II	Agalychnis spurrelli	live		CN																																								20
II	Agalychnis spurrelli	live		DK																																										10	30
II	Agalychnis spurrelli	live		GB																																									5
II	Agalychnis spurrelli	live		HK																																								20
II	Agalychnis spurrelli	live		JP																																						24		25	30		18		30
II	Agalychnis spurrelli	live		KR																																								6
II	Agalychnis spurrelli	live		NL																																							10		43
II	Agalychnis spurrelli	live		US																																						35		44	15	4	17	10
II	Agalychnis spurrelli	specimens		GB																																							2
II	Agalychnis spurrelli	specimens		US																																							1
II	Allobates femoralis	bodies		AT																			4			2											80
II	Allobates femoralis	bodies		AU																																							48				288
II	Allobates femoralis	bodies		DE																																								10
II	Allobates femoralis	bodies		NL																			2	1
II	Allobates femoralis	bodies		US																			4			19		12	10			2										2		13
II	Allobates femoralis	extract	l	US																																											0.02	0.02
II	Allobates femoralis	leather products (small)		JP																																						1
II	Allobates femoralis	live		AT																			100
II	Allobates femoralis	live		DE																											71	10
II	Allobates femoralis	live		DK														20
II	Allobates femoralis	live		US																			15	4		4						5
II	Allobates femoralis	skin pieces		CO																																						41
II	Allobates femoralis	specimens	ml	US																																						15		14
II	Allobates femoralis	specimens		AT																													15	107			300
II	Allobates femoralis	specimens		AU																																							17
II	Allobates femoralis	specimens		CN																																								1
II	Allobates femoralis	specimens		CO																																				11
II	Allobates femoralis	specimens		ES																												34
II	Allobates femoralis	specimens		FR																																								4
II	Allobates femoralis	specimens		GF																																								4	3
II	Allobates femoralis	specimens		NZ																																	25
II	Allobates femoralis	specimens		PA																																		4
II	Allobates femoralis	specimens		US																			4		20	19	19	2										14		4				7	8	8	60	14
II	Allobates spp.	leather products (small)		XX																																												2
II	Allobates spp.	specimens		GF																																									13
II	Allobates spp.	specimens		US																																												1
II	Allobates zaparo	live		US																										60	15
II	Allobates zaparo	specimens		US																																							10		4
II	Ambystoma dumerilii	live		DE																		100
II	Ambystoma dumerilii	live		TW																																											5
II	Ambystoma dumerilii	live		US																					8
II	Ambystoma dumerilii	specimens		US					18
II	Ambystoma mexicanum	bodies		GB																		3
II	Ambystoma mexicanum	bodies		JP																																						250
II	Ambystoma mexicanum	bodies		SE																																22	105
II	Ambystoma mexicanum	bodies		US																																								10
II	Ambystoma mexicanum	bodies		ZA																				3
II	Ambystoma mexicanum	derivatives		US																								8	3
II	Ambystoma mexicanum	eggs		AT																													400
II	Ambystoma mexicanum	eggs		CA															100				200			990	450	110													60
II	Ambystoma mexicanum	eggs		DE																			600			200	700	360	1500	1880	1200
II	Ambystoma mexicanum	eggs		ES																									40
II	Ambystoma mexicanum	eggs		GB																								100		700
II	Ambystoma mexicanum	eggs		JP																								70
II	Ambystoma mexicanum	eggs		SE																						200	1000	1200		400
II	Ambystoma mexicanum	eggs		US							200																200	30	50
II	Ambystoma mexicanum	eggs (live)		CA																										22		25		900
II	Ambystoma mexicanum	eggs (live)		JP																																		200
II	Ambystoma mexicanum	eggs (live)		SE																										2000
II	Ambystoma mexicanum	eggs (live)		US																									50														100		80			1180
II	Ambystoma mexicanum	leather products (small)		KR																										5
II	Ambystoma mexicanum	live	kg	SE									1.814
II	Ambystoma mexicanum	live		AE																																					10	20
II	Ambystoma mexicanum	live		AN																																				1
II	Ambystoma mexicanum	live		AR									5	12
II	Ambystoma mexicanum	live		AT													9		15													16
II	Ambystoma mexicanum	live		AU				10	10																																		20
II	Ambystoma mexicanum	live		BE															180				200			100
II	Ambystoma mexicanum	live		BR																					80
II	Ambystoma mexicanum	live		CA							10	12			235				190		300		1305	820	360	1592	470	430	200	1200	70	342	1627	811	1106	2962	1471	456	350	761	510	753	409	382	710	275	874	136	40
II	Ambystoma mexicanum	live		CH							36		6	10	20	53	3		5		272		2	45				6								10		4		30	14	90		1	1
II	Ambystoma mexicanum	live		CL																																				150
II	Ambystoma mexicanum	live		CN																						8									100	200		300					200
II	Ambystoma mexicanum	live		CO																																								30
II	Ambystoma mexicanum	live		DE			7				210								42	100	1350	3445		600	350	400	200	890	1400	2320	4820	3650	3000	1560	60	460			15	20			10						50
II	Ambystoma mexicanum	live		DK									50		7				90		5																			75
II	Ambystoma mexicanum	live		ES																		200		115	315			20	40	150		185	214				50
II	Ambystoma mexicanum	live		FI														10		15		20		10
II	Ambystoma mexicanum	live		FR												12							20								63											4
II	Ambystoma mexicanum	live		GB										82		1						2	62	1					500	200	1552	1897	3310	1250						20	30		20	30
II	Ambystoma mexicanum	live		GR																																			208	208
II	Ambystoma mexicanum	live		HK																																200		300			24		300				100
II	Ambystoma mexicanum	live		HR																												10
II	Ambystoma mexicanum	live		HU																					12
II	Ambystoma mexicanum	live		ID																																					50
II	Ambystoma mexicanum	live		IL																																							30
II	Ambystoma mexicanum	live		IN																																			382
II	Ambystoma mexicanum	live		IT									50									80					700											1	1
II	Ambystoma mexicanum	live		JP								57	568	1400	14407	10503	4670	3776	4500	7856	3158	3914	4550	3425	3435	4050	2300	2320	2040	1280	610	30	30	910			2078	252	10	10		250			5				30
II	Ambystoma mexicanum	live		KP																										5
II	Ambystoma mexicanum	live		KR																																300	5000						187	25					62
II	Ambystoma mexicanum	live		LK																													14
II	Ambystoma mexicanum	live		MC																																								10
II	Ambystoma mexicanum	live		ME																																		1	1
II	Ambystoma mexicanum	live		MG																																								3
II	Ambystoma mexicanum	live		MX																				54							10							350	102								200
II	Ambystoma mexicanum	live		MY																																							32
II	Ambystoma mexicanum	live		NL		200					1250						150	965											180	368	204	100	350										15
II	Ambystoma mexicanum	live		NO																																												2
II	Ambystoma mexicanum	live		RU																																						2
II	Ambystoma mexicanum	live		SE																1615	3772	3806	2050	1430		1050	1004	400	250		100	100	280	60
II	Ambystoma mexicanum	live		SG														82															1000												25
II	Ambystoma mexicanum	live		SI																													30		22	10
II	Ambystoma mexicanum	live		TH																																													6
II	Ambystoma mexicanum	live		TR																																							30	620
II	Ambystoma mexicanum	live		TT																																4
II	Ambystoma mexicanum	live		TW												3																	20
II	Ambystoma mexicanum	live		US			8	200	71		1725	2458	506	170	657	327	5	40	300		750		30	70	8	40							21		201				30	410	872		108	4	4	2	13	1186
II	Ambystoma mexicanum	live		XX																																											3
II	Ambystoma mexicanum	live		ZA			26					2
II	Ambystoma mexicanum	skeletons		CA																																		1
II	Ambystoma mexicanum	skeletons		GB																																		1
II	Ambystoma mexicanum	skeletons		US																																			1
II	Ambystoma mexicanum	specimens	boxes	CA																																1
II	Ambystoma mexicanum	specimens		CA																										250			410		48	900		306
II	Ambystoma mexicanum	specimens		DE																										1000															150		12
II	Ambystoma mexicanum	specimens		JP														130						135																10
II	Ambystoma mexicanum	specimens		MX																																											200
II	Ambystoma mexicanum	specimens		SE																								500									105
II	Ambystoma mexicanum	specimens		US					20		570	200	900			200																		2								1
II	Ambystoma mexicanum	unspecified		JP														146
II	Ambystoma spp.	live		CA							9
II	Ameerega altamazonica	live		SE																																							2
II	Ameerega altamazonica	live		US																																										3
II	Ameerega altamazonica	trophies		CA																																												1
II	Ameerega bassleri	bodies		DE																																								2
II	Ameerega bassleri	bodies		US																													1
II	Ameerega bassleri	live	kg	US																																				1
II	Ameerega bassleri	live		CA																								6								26	90		12	2							78	18
II	Ameerega bassleri	live		CH																																						8
II	Ameerega bassleri	live		CN																																											26
II	Ameerega bassleri	live		DE																																					50
II	Ameerega bassleri	live		FR																																												2
II	Ameerega bassleri	live		GB																																											6
II	Ameerega bassleri	live		JP															4									10										1	4	11	35	4	4	9	4	5	23	6
II	Ameerega bassleri	live		KR																																										10	4		5
II	Ameerega bassleri	live		MX																																10
II	Ameerega bassleri	live		NL																																65	160	370	75	170	80	10	35			16	10
II	Ameerega bassleri	live		PH																																					2	15						2
II	Ameerega bassleri	live		SE																																						8	9		1		6		4
II	Ameerega bassleri	live		SG																																													6
II	Ameerega bassleri	live		SU															4
II	Ameerega bassleri	live		TW																																				3	2	1	5			5		4	2
II	Ameerega bassleri	live		US																							56			10				20	6	150	66	50	95	93	69	43	47	44	15	12	16	23
II	Ameerega bassleri	specimens	cm3	DE																																										4
II	Ameerega bassleri	specimens		US																													2
II	Ameerega berohoka	bodies		DE																																											1
II	Ameerega berohoka	specimens		DE																																												1
II	Ameerega bilinguis	specimens		US																														5				1		1			10		4
II	Ameerega boliviana	live		US																													4
II	Ameerega braccata	bodies		DE																																											8
II	Ameerega braccata	specimens		DE																																												8
II	Ameerega cainarachi	bodies		DE																																								7
II	Ameerega cainarachi	bodies		US																													1
II	Ameerega cainarachi	live		CA																																	16	18				12				9
II	Ameerega cainarachi	live		MX																																5
II	Ameerega cainarachi	live		US																																1	1										14
II	Ameerega cainarachi	specimens		US																													2
II	Ameerega erythromos	specimens		US																																										1
II	Ameerega hahneli	bodies		DE																																								23
II	Ameerega hahneli	bodies		US																																								2
II	Ameerega hahneli	extract	l	US																																											0.03
II	Ameerega hahneli	live		CA																																	40	18	20			17				9
II	Ameerega hahneli	live		CN																																										8	20
II	Ameerega hahneli	live		DE																																					25	25
II	Ameerega hahneli	live		FR																																									5
II	Ameerega hahneli	live		HK																																											10
II	Ameerega hahneli	live		JP																																		3						5		4	14	21
II	Ameerega hahneli	live		NL																																	40	80	80	120		10	10	10	6	16	10	10	10
II	Ameerega hahneli	live		SE																																							2		8				3
II	Ameerega hahneli	live		US																																10			32	26	15	29	36	16	11	18	16	14
II	Ameerega hahneli	skin pieces		CO																																						15
II	Ameerega hahneli	specimens	ml	US																																											30
II	Ameerega hahneli	specimens		FR																																								8
II	Ameerega hahneli	specimens		GF																																								8
II	Ameerega hahneli	specimens		PA																																		4
II	Ameerega hahneli	specimens		US																																				5			10	2	16	35		15
II	Ameerega macero	bodies		CH																									1
II	Ameerega macero	bodies		US																									10				1											1
II	Ameerega macero	extract	l	US																																											0.01
II	Ameerega macero	specimens	ml	US																																											10
II	Ameerega macero	specimens		US																													1											1		36
II	Ameerega maculata	live		US																					50					27
II	Ameerega parvula	bodies		US														4	1
II	Ameerega parvula	live		CA																																												4
II	Ameerega parvula	live		JP																											20
II	Ameerega parvula	live		TW																														10
II	Ameerega parvula	live		US																													7
II	Ameerega parvula	specimens		US																																							10
II	Ameerega pepperi	live		CN																																											7
II	Ameerega pepperi	live		JP																																											7		2
II	Ameerega pepperi	live		SE																																							6
II	Ameerega pepperi	live		US																																									4
II	Ameerega petersi	bodies		US																													2
II	Ameerega petersi	live		DE																												10
II	Ameerega petersi	specimens		PA																																		4
II	Ameerega petersi	specimens		US																													5
II	Ameerega picta	bodies		DE																												3												2
II	Ameerega picta	bodies		NL																					16				2
II	Ameerega picta	bodies		US																							1	2	10			2		1
II	Ameerega picta	live		CA																									110							40
II	Ameerega picta	live		CZ																									111
II	Ameerega picta	live		DE																												20	10
II	Ameerega picta	live		JP																									252	40
II	Ameerega picta	live		NL																																35	12	12
II	Ameerega picta	live		PT																										50
II	Ameerega picta	live		US																				1				33	684	204					8	10
II	Ameerega picta	skin pieces		CO																																						8
II	Ameerega picta	specimens		NL																					22
II	Ameerega picta	specimens		US																			1
II	Ameerega pongoensis	live		CA																																		12	22					6		20	54
II	Ameerega pongoensis	live		FR																																											6
II	Ameerega pongoensis	live		JP																																										4	22
II	Ameerega pongoensis	live		NL																																											8
II	Ameerega pongoensis	live		SE																																									2
II	Ameerega pongoensis	live		US																																							6	12
II	Ameerega pulchripecta	skin pieces		CO																																						10
II	Ameerega rubriventris	live		NL																																	10
II	Ameerega silverstonei	bodies		US																														2
II	Ameerega silverstonei	live		CA																								16										21	12				4
II	Ameerega silverstonei	live		CN																																											1
II	Ameerega silverstonei	live		DE																																										6
II	Ameerega silverstonei	live		FR																																									4
II	Ameerega silverstonei	live		HU																								6
II	Ameerega silverstonei	live		JP																																									13
II	Ameerega silverstonei	live		KR																																											6		5
II	Ameerega silverstonei	live		NL																																										10
II	Ameerega silverstonei	live		SE																																									2
II	Ameerega silverstonei	live		US																							34	10	64	24														17	9	8	1	25
II	Ameerega silverstonei	specimens		US																														4
II	Ameerega simulans	bodies		CH																									3
II	Ameerega simulans	bodies		US																													1
II	Ameerega simulans	specimens		US																													2													1
II	Ameerega spp.	bodies		US																																									1
II	Ameerega spp.	specimens		US																																							5	1				6
II	Ameerega trivittata	bodies		AT																			4
II	Ameerega trivittata	bodies		AU																																											3
II	Ameerega trivittata	bodies		DE																																								7	100		126
II	Ameerega trivittata	bodies		NL																					6	1
II	Ameerega trivittata	bodies		US																			5			23			45															18
II	Ameerega trivittata	extract	l	US																																											0.01
II	Ameerega trivittata	live		AN																									33
II	Ameerega trivittata	live		BE													350								41
II	Ameerega trivittata	live		BR																			5
II	Ameerega trivittata	live		CA																								57	73	110	51	30			164	32												17
II	Ameerega trivittata	live		CN																																										8	6
II	Ameerega trivittata	live		CZ																									102
II	Ameerega trivittata	live		DE															55									50			20	81	50										50
II	Ameerega trivittata	live		FR																																								6
II	Ameerega trivittata	live		GB														100
II	Ameerega trivittata	live		JP															4			10				10	12	11	655	253	8	5		40									4	3	4		11	46
II	Ameerega trivittata	live		MX																												15
II	Ameerega trivittata	live		NL																100			50				93	254	178	197	130	22				65	47						26	190	165	115	3
II	Ameerega trivittata	live		PH																																												15
II	Ameerega trivittata	live		SG																										6
II	Ameerega trivittata	live		SU															4
II	Ameerega trivittata	live		TR																																							8	10
II	Ameerega trivittata	live		TW																													10									5			4
II	Ameerega trivittata	live		US														280	25	145	100		21	25	87	76	92	181	1094	289	321	561							80			92	252	340	307	42
II	Ameerega trivittata	specimens	cm3	DE																																										4
II	Ameerega trivittata	specimens	ml	US																																								30			10
II	Ameerega trivittata	specimens		DE																																									39		126
II	Ameerega trivittata	specimens		ES																												33
II	Ameerega trivittata	specimens		FR																																								8
II	Ameerega trivittata	specimens		GF																																								3	7
II	Ameerega trivittata	specimens		NL																					6
II	Ameerega trivittata	specimens		US																						5			4															19	12	20		9
II	Amphibia	specimens	mg	US																																											98
II	Amphibia	specimens		DE																																											13
II	Amphibia	specimens		US																																											27
II	Andinobates abditus	live		JP																																							20				20
II	Andinobates bombetes	specimens		US																																				40
II	Andinobates claudiae	bodies		DE																																										2
II	Andinobates claudiae	specimens		US																																								5
II	Andinobates fulguritus	live		DE																		8				4		4
II	Andinobates fulguritus	live		JP																													6	4	6	6
II	Andinobates fulguritus	live		US																														9			2
II	Andinobates fulguritus	specimens		US																																				3					10
II	Andinobates minutus	live		DE																		8
II	Andinobates minutus	live		JP																							20
II	Andinobates minutus	live		US													5			10	10														14
II	Andinobates minutus	specimens		US																			11																							2	5
II	Andinobates spp.	specimens		US																																										1
II	Andinobates viridis	live		US																												20
II	Bufo retiformis	live		CH					5
II	Bufo retiformis	unspecified		US																									3
II	Dendrobates auratus	bodies		CA																																								1
II	Dendrobates auratus	bodies		GB																																				50
II	Dendrobates auratus	bodies		US														40	62					15					20																1
II	Dendrobates auratus	live		AE																														20	12	12					14				4				5
II	Dendrobates auratus	live		AN																																		15
II	Dendrobates auratus	live		AR																																42		12		12			250	250
II	Dendrobates auratus	live		AT																				22		10	23		8							20			200
II	Dendrobates auratus	live		BE																				259	140	45	84				6		1000								1300	1300	1150	1300	250
II	Dendrobates auratus	live		BG																								6			8
II	Dendrobates auratus	live		BY																																								10
II	Dendrobates auratus	live		CA														6		20		38	12	24	22	36	3	43	136	187	77	78	305	215	950	361	312	382	48	256	50	120	107		6	12	73	136	16
II	Dendrobates auratus	live		CH															10					1									300	614	35	121	221	347	476	369	164	82		45	20		2	1	24
II	Dendrobates auratus	live		CL																														50				8		100				50	20
II	Dendrobates auratus	live		CN																												10					35						74			8	270
II	Dendrobates auratus	live		CR																			20
II	Dendrobates auratus	live		CW																																				50
II	Dendrobates auratus	live		CZ																			12	6			50													25			18
II	Dendrobates auratus	live		DE															20	4	8	115	298	126	60	138	363	69	421	426	455	150	410	150	331	392	600	1010	1505	1615	1615	755				100
II	Dendrobates auratus	live		DK															45									4					12		30		20								200	410		4	4
II	Dendrobates auratus	live		EC																															6
II	Dendrobates auratus	live		EE																									7
II	Dendrobates auratus	live		ES																			5	20	205	280	228		75		50		12	360		3143	550	500	625	250	800					400	350	500	117
II	Dendrobates auratus	live		FI																			5
II	Dendrobates auratus	live		FR																			2		99	70			138	50	142		255	140	520		187	225	211	133	25		480	78	80	85	40	37
II	Dendrobates auratus	live		GB													60					40		137	26	76		4					600	910	35	43	275	200		4		100	100			100	39
II	Dendrobates auratus	live		GH																															4	8
II	Dendrobates auratus	live		GT																															7	7			6	4							6	6
II	Dendrobates auratus	live		HK																			4	6																	36		167				3
II	Dendrobates auratus	live		HR																												10					5	5
II	Dendrobates auratus	live		HU																																									450
II	Dendrobates auratus	live		ID																						10			15			9			12	37		12			4
II	Dendrobates auratus	live		IL																													10	3
II	Dendrobates auratus	live		IS																																6
II	Dendrobates auratus	live		IT																						65			50	100	50	100	535	500		45		100	50		1400
II	Dendrobates auratus	live		JE																																	4
II	Dendrobates auratus	live		JP																			46	350	144	322	379	314	453	440	213	156	274	813	270	123	101	266	276	654	569	373	326	790	323	586	526	693	89
II	Dendrobates auratus	live		KR																									10	5			4	16		10	30		25	32	43		73	22	148	227	34	15	12
II	Dendrobates auratus	live		KZ																													10
II	Dendrobates auratus	live		LV																								7
II	Dendrobates auratus	live		MD																														10
II	Dendrobates auratus	live		MX																							20		25	50				80	12	32		10	12		46		82	30
II	Dendrobates auratus	live		MY																															57	60		12		25	77	77	33	10	50		115		19
II	Dendrobates auratus	live		NA																							10
II	Dendrobates auratus	live		NL													12	204	200			22		13	17	150	247		150		10	10	100	97	100	160	475	615	250	1022	750	200	100	212	308	129	49	30	85
II	Dendrobates auratus	live		NO																														3					3					10
II	Dendrobates auratus	live		PA																												20												2	50
II	Dendrobates auratus	live		PH																													6								50	25			35	10		25
II	Dendrobates auratus	live		PL																					10			6	15	15			15	50
II	Dendrobates auratus	live		PT																													20	20
II	Dendrobates auratus	live		RU																									10	18												1
II	Dendrobates auratus	live		SE																		6	29							200		60	18				5					17	5		21		28		38
II	Dendrobates auratus	live		SG																						30		10		4			14												2	5	25	49
II	Dendrobates auratus	live		SK																																										50
II	Dendrobates auratus	live		SU																	4
II	Dendrobates auratus	live		TH																												6	50	166	150	50	150	60	300	10	21	10	27	50	55	30		20
II	Dendrobates auratus	live		TR																																					10		10		11	15	29	6
II	Dendrobates auratus	live		TW																												60	67	356	132	159	145	77	70	45	362	60		62	146	104	35	50	42
II	Dendrobates auratus	live		UA																															12	12		50		50	50	50					50
II	Dendrobates auratus	live		US													5		80		35	450	2077	2467	3118	6954	1778	1019	5180	2099	505	3834	4556	6283	8442	8184	7353	8730	5836	2170	2004	1310	1924	1035	578	675	1037	1278	19
II	Dendrobates auratus	live		UY																															20
II	Dendrobates auratus	live		UZ																																10
II	Dendrobates auratus	live		XX																											25					300	20									9
II	Dendrobates auratus	live		ZA																										5	15					47		10	34	34	12
II	Dendrobates auratus	specimens		AU																																						5
II	Dendrobates auratus	specimens		BE																																											6
II	Dendrobates auratus	specimens		CH																																					12
II	Dendrobates auratus	specimens		CO																																						15
II	Dendrobates auratus	specimens		DE																																3		16				95
II	Dendrobates auratus	specimens		NZ																																						1
II	Dendrobates auratus	specimens		PA																																			2
II	Dendrobates auratus	specimens		US																			24						19									47		22				40	1	1	20
II	Dendrobates auratus	unspecified		US																																										48
II	Dendrobates leucomelas	bodies		US																																						3				3
II	Dendrobates leucomelas	live		AE																														20					6		4					8
II	Dendrobates leucomelas	live		AT																							8
II	Dendrobates leucomelas	live		CA														15								4		49	25	73			10		125			186		30	17		5		19		5	76	3
II	Dendrobates leucomelas	live		CH																							8					2		1	12	13		9	6	23	16	6			4			6
II	Dendrobates leucomelas	live		CN																												10					10										17
II	Dendrobates leucomelas	live		CZ																													6
II	Dendrobates leucomelas	live		DE																					10	42	78	80	20	175	16	63	85	40				20	22	6	6	41	5
II	Dendrobates leucomelas	live		ES																																			20
II	Dendrobates leucomelas	live		FI																			2			8
II	Dendrobates leucomelas	live		FO																														1	2	3	2		3		2	3					3
II	Dendrobates leucomelas	live		FR																															8		10	12			20		12	30	10	12	13	6
II	Dendrobates leucomelas	live		GB																					16	12																			25		5
II	Dendrobates leucomelas	live		GH																															6	6
II	Dendrobates leucomelas	live		GT																															6
II	Dendrobates leucomelas	live		HK																				12																							16
II	Dendrobates leucomelas	live		HR																																					10	10
II	Dendrobates leucomelas	live		ID																									15									5			6	12
II	Dendrobates leucomelas	live		IL																												10		5								10
II	Dendrobates leucomelas	live		JP														6				5	15		78	85	56	88	47	140	205	8	60	90	27	32	22	119	97	194	141	177	115	332	156	293	257	174	90
II	Dendrobates leucomelas	live		KR																										5										43	55	29	7		15	135	33	10	18
II	Dendrobates leucomelas	live		LV																										15
II	Dendrobates leucomelas	live		MX																							20	2									10								6
II	Dendrobates leucomelas	live		MY																															10								15		18		20	18	14
II	Dendrobates leucomelas	live		NL																												10	6					100	50	47	130			160	75	30	15
II	Dendrobates leucomelas	live		NO																						8	8							5
II	Dendrobates leucomelas	live		PA																												20												12
II	Dendrobates leucomelas	live		PH																																						25			35	10		15
II	Dendrobates leucomelas	live		PL																												20
II	Dendrobates leucomelas	live		RU																										10												2
II	Dendrobates leucomelas	live		SE																		2	3							12
II	Dendrobates leucomelas	live		SG																										4	10															5	15	33	6
II	Dendrobates leucomelas	live		SU														4
II	Dendrobates leucomelas	live		TH																												6		100	100			22						40	40
II	Dendrobates leucomelas	live		TR																																					6		25	35		15	9
II	Dendrobates leucomelas	live		TW																												50	7	54			13	6	70	15	30	25	6	113	65	40	30		34
II	Dendrobates leucomelas	live		US																		10	38	165	242	256	256	230	154	90	30	5			290	70	28	287	291	331	203	313	146	268	177	154	249	294
II	Dendrobates leucomelas	live		XX														4
II	Dendrobates leucomelas	live		ZA																											10					37			10	10	10
II	Dendrobates leucomelas	skins		US																																						6
II	Dendrobates leucomelas	specimens	ml	US																																						21				6
II	Dendrobates leucomelas	specimens		US																																					1					3
II	Dendrobates leucomelas	unspecified		CZ																		1
II	Dendrobates spp.	bodies		AT														14					1
II	Dendrobates spp.	bodies		CH																		4
II	Dendrobates spp.	bodies		GB														1
II	Dendrobates spp.	bodies		NL																				7
II	Dendrobates spp.	bodies		US													5		7			10	1						12			1														1
II	Dendrobates spp.	live		AT																											6
II	Dendrobates spp.	live		AU														19
II	Dendrobates spp.	live		BE																				50
II	Dendrobates spp.	live		CA														22	5						12			6
II	Dendrobates spp.	live		CH																																43	31	70	74		43	57		2
II	Dendrobates spp.	live		DE																	4					8		4					35	68	43	43	35		101			57
II	Dendrobates spp.	live		DK															47
II	Dendrobates spp.	live		ES															25																		100
II	Dendrobates spp.	live		FR																						12																	167
II	Dendrobates spp.	live		GB																				3
II	Dendrobates spp.	live		HK																																					75
II	Dendrobates spp.	live		JP															12						15		4	20		5	2					2		8	2	18	67	10	58	112	86	30
II	Dendrobates spp.	live		KR																																										21
II	Dendrobates spp.	live		LB																															3
II	Dendrobates spp.	live		MX																												100
II	Dendrobates spp.	live		MY																																							64
II	Dendrobates spp.	live		NL													250								7			4									40
II	Dendrobates spp.	live		SU																	5
II	Dendrobates spp.	live		TH																														50
II	Dendrobates spp.	live		US														542	1425	80	65	236	2960	275	140	15	170	39	41	398	25						580							1
II	Dendrobates spp.	live		ZA																						9
II	Dendrobates spp.	specimens		GB																					3
II	Dendrobates spp.	specimens		NL																			7
II	Dendrobates spp.	specimens		PA																									7										4
II	Dendrobates spp.	specimens		PE																								8
II	Dendrobates spp.	specimens		US																	3		24	3	35	46	5	5												3						2
II	Dendrobates tinctorius	bodies		US																						6			25	27
II	Dendrobates tinctorius	live		AE																														20				10				20			4	14			20
II	Dendrobates tinctorius	live		AN																									27									185
II	Dendrobates tinctorius	live		AT																									8
II	Dendrobates tinctorius	live		AU														20							30										22	12
II	Dendrobates tinctorius	live		BE													500								66	20					10		25	20
II	Dendrobates tinctorius	live		BG																						4
II	Dendrobates tinctorius	live		BY																																								10
II	Dendrobates tinctorius	live		CA																10	16			12		20	56	665	119	462	302	210	113	24	23	24	19	402	110	61	214		52		7		94	72	60
II	Dendrobates tinctorius	live		CH																				105	50	300	24							7	30	22	32	375	16	104	92	108	90	77	10	11	66	46
II	Dendrobates tinctorius	live		CL																									6															12
II	Dendrobates tinctorius	live		CN																												10														18	224
II	Dendrobates tinctorius	live		CO																																								130
II	Dendrobates tinctorius	live		CR																																					36
II	Dendrobates tinctorius	live		CW																																					12
II	Dendrobates tinctorius	live		CZ																													5											20
II	Dendrobates tinctorius	live		DE														2	20			5	40	10		140	50	101	64	268	61	10	30	75	70			44	240	121	206	28	269	44	27	5
II	Dendrobates tinctorius	live		DK														20
II	Dendrobates tinctorius	live		EC																															8										24
II	Dendrobates tinctorius	live		ES																																						43	43
II	Dendrobates tinctorius	live		FI																						8
II	Dendrobates tinctorius	live		FO																															4
II	Dendrobates tinctorius	live		FR																														30			18	6				5	104	12	29		20	5
II	Dendrobates tinctorius	live		GB														100				14			2	2				2		34	19	6	104	25	4	5		8	4
II	Dendrobates tinctorius	live		GH																															5
II	Dendrobates tinctorius	live		GT																															21	21
II	Dendrobates tinctorius	live		HK																			8	8																	87		40				14	6
II	Dendrobates tinctorius	live		HR																												10					5	5			10	10
II	Dendrobates tinctorius	live		HU																										10
II	Dendrobates tinctorius	live		ID																						10			15									15			10		12				100
II	Dendrobates tinctorius	live		IL																												8
II	Dendrobates tinctorius	live		JE																																	4			8
II	Dendrobates tinctorius	live		JP																15			10	21	63	196	497	560	346	571	398	330	280	490	255	193	112	233	249	668	716	497	532	705	534	1250	1118	733	293
II	Dendrobates tinctorius	live		KR																									4								35			39	127	9	4	30	82	403	63	140	39
II	Dendrobates tinctorius	live		KZ																													10
II	Dendrobates tinctorius	live		LV																							8											5
II	Dendrobates tinctorius	live		MA																																		102
II	Dendrobates tinctorius	live		MX																							35	10		10	20	20		12			54	10					6
II	Dendrobates tinctorius	live		MY																															20						12	18	32	28	43		40	43	25
II	Dendrobates tinctorius	live		NL														250	50	240		9	389	346	574	309	247	552	102	672	90		10			20	110	185	1079	1303	626	697	992	341	200	20	48	70	120
II	Dendrobates tinctorius	live		NO																														10					4	6				10					7
II	Dendrobates tinctorius	live		PA																												40												34	75
II	Dendrobates tinctorius	live		PH																																6					14	50			70	10		55
II	Dendrobates tinctorius	live		PL																								16	10	20	21		12
II	Dendrobates tinctorius	live		PT																												14	24
II	Dendrobates tinctorius	live		QA																																		7										90
II	Dendrobates tinctorius	live		RU																									20	12			30					150				12	30		100
II	Dendrobates tinctorius	live		SE																		1	29	14																			16		2				33
II	Dendrobates tinctorius	live		SG																						10		10		30	13		6									20				20	10	10	12
II	Dendrobates tinctorius	live		SK																																					50
II	Dendrobates tinctorius	live		TH																							2					6	50	440	400			81						47	40	10		80	15
II	Dendrobates tinctorius	live		TR																																					8	6	28	40	19	30	54	22
II	Dendrobates tinctorius	live		TW																												70	30	64	27	41	220	95	90	319	181	35	80	366	449	169	127	25	151
II	Dendrobates tinctorius	live		US														617	100	299	350	861	464	966	1504	1508	1522	1352	2584	1396	1266	857	1211	44	48	52	53	52	625	676	762	521	1686	749	857	98	577	515
II	Dendrobates tinctorius	live		XX																											20
II	Dendrobates tinctorius	live		ZA																										6	20	50		12		57		20	22	22	24	4
II	Dendrobates tinctorius	specimens		AU																																						4
II	Dendrobates tinctorius	specimens		FR																																								3
II	Dendrobates tinctorius	specimens		GB																																												2
II	Dendrobates tinctorius	specimens		GF																																								3	4
II	Dendrobates tinctorius	specimens		US																										34					2								208	18
II	Dendrobates truncatus	live		CA																											6										249	306							4
II	Dendrobates truncatus	live		CL																														20
II	Dendrobates truncatus	live		CN																																											30
II	Dendrobates truncatus	live		DE																									41	16	72	80	10									459
II	Dendrobates truncatus	live		FR																																								52			2
II	Dendrobates truncatus	live		JP																											20		20	22				50		7	4	13	3		22	18		16
II	Dendrobates truncatus	live		MY																															10												10
II	Dendrobates truncatus	live		NL																																											20	10	20
II	Dendrobates truncatus	live		SE																			11																			4			2
II	Dendrobates truncatus	live		TH																														6
II	Dendrobates truncatus	live		TW																													28									5	5
II	Dendrobates truncatus	live		US																				15				21	7													33	35	30	78
II	Dendrobates truncatus	specimens		US																																				1					15				5
II	Dendrobatidae spp.	bodies		GB																																					35
II	Dendrobatidae spp.	live		DK																																									950
II	Dendrobatidae spp.	live		JP																																									120
II	Dendrobatidae spp.	live		US																																									350
II	Dendrobatidae spp.	skins		GB																																					35
II	Dendrobatidae spp.	specimens		US																													30								1760
II	Dyscophus antongilii	live		JP																																											286	80	496
II	Dyscophus antongilii	live		KR																																												20
II	Dyscophus antongilii	live		TH																																													6
II	Dyscophus antongilii	live		US																																													124
II	Dyscophus guineti	live		AE																																													10
II	Dyscophus guineti	live		CA																																											45
II	Dyscophus guineti	live		CZ																																											25	48
II	Dyscophus guineti	live		HK																																											750	720	200
II	Dyscophus guineti	live		HU																																											42	19	10
II	Dyscophus guineti	live		JP																																											145	447	100
II	Dyscophus guineti	live		KP																																												26
II	Dyscophus guineti	live		KR																																												56	40
II	Dyscophus guineti	live		NL																																											21	21
II	Dyscophus guineti	live		RU																																											6	10
II	Dyscophus guineti	live		TR																																												6
II	Dyscophus guineti	live		TW																																											360	200
II	Dyscophus guineti	live		US																																											599	1379
II	Dyscophus insularis	live		CA																																											10
II	Dyscophus insularis	live		HK																																											55	5
II	Dyscophus insularis	live		JP																																											91	250
II	Dyscophus insularis	live		KR																																												23
II	Dyscophus insularis	live		NL																																											22	22
II	Dyscophus insularis	live		TW																																												50
II	Dyscophus insularis	live		US																																											140	213
II	Dyscophus insularis	specimens		US																																												9
II	Epipedobates anthonyi	live		BY																																								10
II	Epipedobates anthonyi	live		CA																																									87
II	Epipedobates anthonyi	live		CH																																				3							25
II	Epipedobates anthonyi	live		CN																																											19
II	Epipedobates anthonyi	live		DK																																											20
II	Epipedobates anthonyi	live		FR																																									25	28	10	30
II	Epipedobates anthonyi	live		JP																																						9			8	8		74
II	Epipedobates anthonyi	live		KR																																					2		10				4
II	Epipedobates anthonyi	live		NL																		4																						21	31			20
II	Epipedobates anthonyi	live		PH																																									50
II	Epipedobates anthonyi	live		RU																																						2
II	Epipedobates anthonyi	live		SE																																													11
II	Epipedobates anthonyi	live		SG																																													6
II	Epipedobates anthonyi	live		TH																																										10
II	Epipedobates anthonyi	live		TW																																					20				30				49
II	Epipedobates anthonyi	live		US													6							50				4										100						347	18	23	29	23
II	Epipedobates anthonyi	specimens		US																																							403	305	123		184	34
II	Epipedobates bilinguis	live		DE															3
II	Epipedobates bilinguis	live		JP																											20
II	Epipedobates boulengeri	bodies		US																				9
II	Epipedobates boulengeri	live		BE																				65
II	Epipedobates boulengeri	live		CA																				10			12
II	Epipedobates boulengeri	live		FR																									25
II	Epipedobates boulengeri	live		JP																				20				166			30		20
II	Epipedobates boulengeri	live		SE																										120		20
II	Epipedobates boulengeri	live		US																				285	266		50								10				7
II	Epipedobates boulengeri	specimens		US																							2													19			20		172		127	43
II	Epipedobates darwinwallacei	specimens		US																																									84
II	Epipedobates espinosai	live		US													10
II	Epipedobates espinosai	specimens		US																																									64		4
II	Epipedobates machalilla	specimens		US																																							15		36		27	136
II	Epipedobates narinensis	specimens		US																																											43
II	Epipedobates spp.	bodies		US																						46		14	8				3	1
II	Epipedobates spp.	live		CH																																								3
II	Epipedobates spp.	live		SG																										2
II	Epipedobates spp.	live		US																						11	12		146		9									8
II	Epipedobates spp.	specimens		ES																												32
II	Epipedobates spp.	specimens		US																						21		3	4				9	12									10		84		5
II	Epipedobates tricolor	live		AE																														20
II	Epipedobates tricolor	live		AT																		20					12
II	Epipedobates tricolor	live		BE																				120		200	100
II	Epipedobates tricolor	live		CA																					10	27	45	36		20								2			12			100	53
II	Epipedobates tricolor	live		CH																							140										17	32	16	28	29
II	Epipedobates tricolor	live		CN																																											13
II	Epipedobates tricolor	live		DE														3	60				60			140	92	5		31	8	40	38	24	24	8	8	16	24	8	108	62
II	Epipedobates tricolor	live		DK															7		6						12																			10	20	12
II	Epipedobates tricolor	live		ES																				10			12		12
II	Epipedobates tricolor	live		FO																															7													8
II	Epipedobates tricolor	live		FR																						49	111																		63	8	10
II	Epipedobates tricolor	live		GB														30																	10		10		5						6
II	Epipedobates tricolor	live		HK																			3
II	Epipedobates tricolor	live		IL																									10					5
II	Epipedobates tricolor	live		IT																						100	18
II	Epipedobates tricolor	live		JE																																	10
II	Epipedobates tricolor	live		JP														25	5			10	10	12	20	18	84	117		68	28	10	24	68	40	10		80	33	80	45	58	35	32	21	61	73	24
II	Epipedobates tricolor	live		KR																																	5									30			17
II	Epipedobates tricolor	live		MX																							25	5						20			6
II	Epipedobates tricolor	live		MY																															10														25
II	Epipedobates tricolor	live		NL																																				278		10	10	33	111
II	Epipedobates tricolor	live		NO																																				4
II	Epipedobates tricolor	live		PH																																						50						4
II	Epipedobates tricolor	live		RU																										8
II	Epipedobates tricolor	live		SE																		8											20
II	Epipedobates tricolor	live		SU														6
II	Epipedobates tricolor	live		TG																													4
II	Epipedobates tricolor	live		TH																														50	50
II	Epipedobates tricolor	live		TR																																					6					15
II	Epipedobates tricolor	live		TW																												50	10	128				30	10	18	54	4		10		46	40	30
II	Epipedobates tricolor	live		US													26		30			5	39	703	1443	1090	1535	63	24	47	38	14						100	210	362	4	22	10	29	48	47	31	40
II	Epipedobates tricolor	specimens		US																																							23		40		5	64
II	Euphlyctis hexadactylus	bodies		US																														1
II	Euphlyctis hexadactylus	live		BE																		50
II	Euphlyctis hexadactylus	meat	boxes	US												856
II	Euphlyctis hexadactylus	meat	kg	BE											38590	112726
II	Euphlyctis hexadactylus	meat	kg	CA											83286	64721	4899
II	Euphlyctis hexadactylus	meat	kg	ES											4540
II	Euphlyctis hexadactylus	meat	kg	FR											11559	89101
II	Euphlyctis hexadactylus	meat	kg	GB											7628	2000
II	Euphlyctis hexadactylus	meat	kg	GR											13257
II	Euphlyctis hexadactylus	meat	kg	JP												6156
II	Euphlyctis hexadactylus	meat	kg	SG																19295
II	Euphlyctis hexadactylus	meat	kg	US											422113	599642
II	Euphlyctis hexadactylus	meat		BE												585200
II	Euphlyctis hexadactylus	meat		US											920170	796935
II	Euphlyctis hexadactylus	shoes		US												24
II	Euphlyctis hexadactylus	specimens		US															2000
II	Excidobates captivus	specimens		US																																							10	2		2
II	Excidobates mysteriosus	live		CA																													18																8
II	Excidobates mysteriosus	live		CH																											2													4
II	Excidobates mysteriosus	live		DE																																					8				10
II	Excidobates mysteriosus	live		GB																																				8		20
II	Excidobates mysteriosus	live		JP																														7				20	20				30	16	87	85	100	48	53
II	Excidobates mysteriosus	live		KR																																										52		10
II	Excidobates mysteriosus	live		PH																																										6		12
II	Excidobates mysteriosus	live		TR																																										15
II	Excidobates mysteriosus	live		US																													30								100
II	Excidobates spp.	specimens		US																																								2
II	Hoplobatrachus tigerinus	bodies	kg	CA													19337
II	Hoplobatrachus tigerinus	bodies	kg	US													108275
II	Hoplobatrachus tigerinus	bodies		DE																													1	1				7		7
II	Hoplobatrachus tigerinus	bodies		IT																														1
II	Hoplobatrachus tigerinus	bodies		KW																			1
II	Hoplobatrachus tigerinus	bodies		MO																		1
II	Hoplobatrachus tigerinus	bodies		US																													2				20
II	Hoplobatrachus tigerinus	feet	kg	CA																4082
II	Hoplobatrachus tigerinus	feet		CA																160
II	Hoplobatrachus tigerinus	frog legs	kg	VN																															11050
II	Hoplobatrachus tigerinus	leather items		US													5472	100
II	Hoplobatrachus tigerinus	live	boxes	US														50
II	Hoplobatrachus tigerinus	live	kg	SG																			220
II	Hoplobatrachus tigerinus	live		BE														3136
II	Hoplobatrachus tigerinus	live		CA																																						9	6
II	Hoplobatrachus tigerinus	live		CN																																15000
II	Hoplobatrachus tigerinus	live		CZ																																							12	6
II	Hoplobatrachus tigerinus	live		GB																							3
II	Hoplobatrachus tigerinus	live		KR																																								2
II	Hoplobatrachus tigerinus	live		RU																																						4
II	Hoplobatrachus tigerinus	live		TW																																									2
II	Hoplobatrachus tigerinus	live		US															1																				31	54						23
II	Hoplobatrachus tigerinus	meat	boxes	CA																160
II	Hoplobatrachus tigerinus	meat	boxes	US												620				297
II	Hoplobatrachus tigerinus	meat	cartons	CA																1427
II	Hoplobatrachus tigerinus	meat	cartons	FR																			800
II	Hoplobatrachus tigerinus	meat	kg	AD																23
II	Hoplobatrachus tigerinus	meat	kg	AE																										30
II	Hoplobatrachus tigerinus	meat	kg	AU												16620													5000
II	Hoplobatrachus tigerinus	meat	kg	BE											364068	745082	543469	370623.906	249924.312	27036								191688	67628	41000	62100	150400	269060	228892	233754	23868
II	Hoplobatrachus tigerinus	meat	kg	CA											55309	235892	328589	497457.531	380917.681	73916.048	1179.36	180683.712						50000	40000	70000	113247.2	129700	193200	268749	438615	42386
II	Hoplobatrachus tigerinus	meat	kg	CD																											13608
II	Hoplobatrachus tigerinus	meat	kg	CN																								10000				17000
II	Hoplobatrachus tigerinus	meat	kg	DD											14982	3409
II	Hoplobatrachus tigerinus	meat	kg	DE																												1000			2760
II	Hoplobatrachus tigerinus	meat	kg	DO																							4794
II	Hoplobatrachus tigerinus	meat	kg	ES											7171																4200	6600	4000	27000	27200	5432
II	Hoplobatrachus tigerinus	meat	kg	FR											194811	77779	41818	16329.6										9000	8500		36968.8	72500	103500	29004	24050
II	Hoplobatrachus tigerinus	meat	kg	GB											79666	20455	33409	91764.797	111395.084															4000	28860
II	Hoplobatrachus tigerinus	meat	kg	HK																									20004		10000				1000
II	Hoplobatrachus tigerinus	meat	kg	HR																															1
II	Hoplobatrachus tigerinus	meat	kg	IT																											20000	18000	38200	38455	55040
II	Hoplobatrachus tigerinus	meat	kg	JP																									2.5		19500	4000	2000	1200	899
II	Hoplobatrachus tigerinus	meat	kg	LB																														3850
II	Hoplobatrachus tigerinus	meat	kg	LY																															4000
II	Hoplobatrachus tigerinus	meat	kg	NL											153797	103628	79574	215374.865	272112.660	22555	20339.36	19160.064					19090				38200		6500	7200	6000
II	Hoplobatrachus tigerinus	meat	kg	NO												707
II	Hoplobatrachus tigerinus	meat	kg	NZ																									15
II	Hoplobatrachus tigerinus	meat	kg	PL																													1020
II	Hoplobatrachus tigerinus	meat	kg	RU																													20000	18000
II	Hoplobatrachus tigerinus	meat	kg	SE																257.191													15000
II	Hoplobatrachus tigerinus	meat	kg	SG																9829										6750			10560
II	Hoplobatrachus tigerinus	meat	kg	UA																													600
II	Hoplobatrachus tigerinus	meat	kg	US											871313	2562604	2467740	2754049.252	2655917.095	53522	972324	932626.704	2	21247	88	210083	139967	390580.8	187054	195645	187366.94	822253.1	215662.5	214053.56	228087.6	6810	18370
II	Hoplobatrachus tigerinus	meat	kg	VN																								16330					7171
II	Hoplobatrachus tigerinus	meat	kg	XX														38102.398
II	Hoplobatrachus tigerinus	meat	shipments	CZ																			5
II	Hoplobatrachus tigerinus	meat		BE													95832
II	Hoplobatrachus tigerinus	meat		CA													2721	8760	8626
II	Hoplobatrachus tigerinus	meat		CH												107640
II	Hoplobatrachus tigerinus	meat		FR												45
II	Hoplobatrachus tigerinus	meat		GB											17700			43380
II	Hoplobatrachus tigerinus	meat		NL													145712	91225	76425									1290
II	Hoplobatrachus tigerinus	meat		US											2949298	2384631	2063309	600502	242382				1420							8505
II	Hoplobatrachus tigerinus	skeletons		US																																	200
II	Hoplobatrachus tigerinus	specimens	g	CN																																									2
II	Hoplobatrachus tigerinus	specimens	g	GB																																									6.2
II	Hoplobatrachus tigerinus	specimens	mg	US																																								1
II	Hoplobatrachus tigerinus	specimens		CN																																	1
II	Hoplobatrachus tigerinus	specimens		EC																																		1
II	Hoplobatrachus tigerinus	specimens		US													1	115000				10								380				1				1		2				6				2
II	Hoplobatrachus tigerinus	unspecified		US																																	10
II	Hoplobatrachus tigerinus	unspecified		XX																																										20
II	Hyloxalus azureiventris	bodies		US																													1
II	Hyloxalus azureiventris	live		AN																																		30
II	Hyloxalus azureiventris	live		CA																							2										6	4		4
II	Hyloxalus azureiventris	live		FR																																								2
II	Hyloxalus azureiventris	live		JP																			15																3	23	7		10	20		15		10
II	Hyloxalus azureiventris	live		KR																																										10
II	Hyloxalus azureiventris	live		MX																																14	10
II	Hyloxalus azureiventris	live		NL																																				50
II	Hyloxalus azureiventris	live		PH																																									20
II	Hyloxalus azureiventris	live		TH																															40
II	Hyloxalus azureiventris	live		TW																																	20				10	10
II	Hyloxalus azureiventris	live		US																			30				3									141	10					8	30	18
II	Hyloxalus azureiventris	specimens		US																													2
II	Mantella aurantiaca	bodies		DE																											5			100	1	5
II	Mantella aurantiaca	bodies		RE																					2	2
II	Mantella aurantiaca	bodies		US																								8		17				5											10
II	Mantella aurantiaca	live		AO																																		2
II	Mantella aurantiaca	live		AT																					120
II	Mantella aurantiaca	live		BD																											100
II	Mantella aurantiaca	live		BE																					350	400	600	1550	600	200
II	Mantella aurantiaca	live		BM																																					8		35				16
II	Mantella aurantiaca	live		BW																										4
II	Mantella aurantiaca	live		CA																					94	91	171	612	175	360	439	300	12						40	163	30		20	22			39	25
II	Mantella aurantiaca	live		CH																					480	212	540	686	304	285	80	50	185	11	52		60		11	110	76	25	75		25	25		4
II	Mantella aurantiaca	live		CN																												12															65
II	Mantella aurantiaca	live		CZ																						46		35	20		60
II	Mantella aurantiaca	live		DE																					1100	900	1360	1670	360		200	240			6					36		88
II	Mantella aurantiaca	live		DK																					100	120	372	340					10
II	Mantella aurantiaca	live		ES																					375	175	200	365	200	12	50
II	Mantella aurantiaca	live		FR																					240	640	1080	550	925	30	30												10	14	49		4
II	Mantella aurantiaca	live		GB																					45	330	730	575	170	160	40	300	299			6
II	Mantella aurantiaca	live		HK																							50	20			12	200												42		25		40
II	Mantella aurantiaca	live		HU																						10		20	25
II	Mantella aurantiaca	live		ID																						10		10	90																15	15
II	Mantella aurantiaca	live		IT																					400	206	268	132					20
II	Mantella aurantiaca	live		JE																												7			4		20
II	Mantella aurantiaca	live		JP																					55	325	838	636	565	492	396	80						4	100	409	161	230	264	86	121	153	82	109
II	Mantella aurantiaca	live		KR																																										30
II	Mantella aurantiaca	live		LV																													6
II	Mantella aurantiaca	live		MU																							100	20
II	Mantella aurantiaca	live		MX																								102			20	50	16
II	Mantella aurantiaca	live		MY																							30	72
II	Mantella aurantiaca	live		NL																					1050	1044	1755	1325	440		12	260				85	50	40			250	60	112	70	115	35	30
II	Mantella aurantiaca	live		PH																								10														25						4
II	Mantella aurantiaca	live		RE																					10
II	Mantella aurantiaca	live		RU																						20		16	4	20										118		30	34			77	10	10
II	Mantella aurantiaca	live		SE																																					12	4
II	Mantella aurantiaca	live		SG																						10																						20	6
II	Mantella aurantiaca	live		SK																						90
II	Mantella aurantiaca	live		SV																											6	180
II	Mantella aurantiaca	live		TH																					30	50	40	80		120	20	100	50						20
II	Mantella aurantiaca	live		TW																								30					5								15	7			6
II	Mantella aurantiaca	live		UA																						16																	20
II	Mantella aurantiaca	live		US																				100	7520	12258	9846	23747	5157	10158	9110	3150	2147			16	20		450	1508	169	174	221	184	153	168	171	448
II	Mantella aurantiaca	live		ZA																					200	4																					10
II	Mantella aurantiaca	specimens	g	US																																							100
II	Mantella aurantiaca	specimens	mg	GB																																										50
II	Mantella aurantiaca	specimens	mg	US																																								17		80
II	Mantella aurantiaca	specimens		DE																														100	50	50
II	Mantella aurantiaca	specimens		IT																																										50
II	Mantella aurantiaca	specimens		US																								3						5										55	110	133
II	Mantella aurantiaca	specimens		ZA																										4
II	Mantella baroni	bodies		DE																											3		12	101	2	6				9
II	Mantella baroni	bodies		IT																														4		2
II	Mantella baroni	bodies		US																													8	32		1		12							1
II	Mantella baroni	live		CA																												10	200	200	200	487	180	520	135	301	155	430	735	209	48		51	6
II	Mantella baroni	live		CH																															45	40	20	35	270	195	250	280	300	200	145	60		20
II	Mantella baroni	live		CL																																			50
II	Mantella baroni	live		CN																																	184			95		210
II	Mantella baroni	live		CZ																																					50	130
II	Mantella baroni	live		DE																															90					641							50
II	Mantella baroni	live		ES																																									50
II	Mantella baroni	live		FR																																					100	50	50
II	Mantella baroni	live		GB																																									150	150
II	Mantella baroni	live		HK																																							70		50	450	100
II	Mantella baroni	live		HU																																										20	116
II	Mantella baroni	live		ID																																									30	30		30
II	Mantella baroni	live		IT																																	60						20
II	Mantella baroni	live		JP																														25	120	120	70	527	150	398	632	320	370	506	335	356	240	420
II	Mantella baroni	live		MX																																	100
II	Mantella baroni	live		NL																																		43					200	200
II	Mantella baroni	live		PL																													24
II	Mantella baroni	live		RS																																			120
II	Mantella baroni	live		RU																																				30	30	60	30			100
II	Mantella baroni	live		TH																																66			456				80
II	Mantella baroni	live		TW																															100	32	210						300					250
II	Mantella baroni	live		UA																																		150					225	114
II	Mantella baroni	live		US																											12		450	2565	2425	2433	1886	2377	1894	2057	345	3751	3348	2340	1542	1753	1453	2186
II	Mantella baroni	live		XX																																	142
II	Mantella baroni	specimens	mg	US																																								90
II	Mantella baroni	specimens	ml	US																														6
II	Mantella baroni	specimens		CN																																									1
II	Mantella baroni	specimens		DE																														100	50	50								18
II	Mantella baroni	specimens		IT																													30
II	Mantella baroni	specimens		US																													4	51										56	107	6	13
II	Mantella bernhardi	bodies		DE																													6	104
II	Mantella bernhardi	bodies		IT																														9
II	Mantella bernhardi	bodies		US																													4	9
II	Mantella bernhardi	live		CA																										50										30		14	12
II	Mantella bernhardi	live		CH																														80						55	20		17
II	Mantella bernhardi	live		CN																																				6
II	Mantella bernhardi	live		DE																												20								6
II	Mantella bernhardi	live		HK																																								12
II	Mantella bernhardi	live		JP																											50	50		25						113	26	41	31	29
II	Mantella bernhardi	live		RU																																				44		12	17
II	Mantella bernhardi	live		TH																												100							22	22
II	Mantella bernhardi	live		US																										440	955	530	60	10	60				204	288	13	43	49	12
II	Mantella bernhardi	specimens	ml	US																														4
II	Mantella bernhardi	specimens		DE																														100	50
II	Mantella bernhardi	specimens		US																											8		2	9
II	Mantella betsileo	bodies		DE																											2		5		5	11
II	Mantella betsileo	bodies		IT																															20
II	Mantella betsileo	bodies		NL																											1
II	Mantella betsileo	bodies		US																										17	5	14	14	22		3		59
II	Mantella betsileo	live		BD																											50
II	Mantella betsileo	live		CA																											150	10	100	225	356	250	134	100	150	165	570	146	360	200	30			4
II	Mantella betsileo	live		CH																												10	50	50	30			35	45	220	220	80	50		110	60
II	Mantella betsileo	live		CN																														120	75	284	170			25		172			70
II	Mantella betsileo	live		CS																														50
II	Mantella betsileo	live		CZ																											20			20			45	15	110	100	100	170	50	50	342	275	50	50
II	Mantella betsileo	live		DE																											800	95	25	425	525	530	580	605	608	882	626	150	100
II	Mantella betsileo	live		DK																																			80
II	Mantella betsileo	live		ES																																		30			50	50			90	240	100	300	300
II	Mantella betsileo	live		FR																											15								100	300	200		20	10	52	10
II	Mantella betsileo	live		GB																											50	150	100	50	50	50		70	70	20					391	200
II	Mantella betsileo	live		HK																																									150	400	100
II	Mantella betsileo	live		HU																										20															20	50	116	116	50
II	Mantella betsileo	live		ID																																									5	5		30
II	Mantella betsileo	live		IT																																	111						30
II	Mantella betsileo	live		JP																										100	470	50	25	134	300	195	120	430	50	893	590	300	266	260	300	145	100	106
II	Mantella betsileo	live		MX																												50	12
II	Mantella betsileo	live		NL																											55	50			100	722	345	1067	1133	470	235	635	615	525	125	135	50	40
II	Mantella betsileo	live		RS																																			100
II	Mantella betsileo	live		RU																																				27		12
II	Mantella betsileo	live		SE																																						4
II	Mantella betsileo	live		TH																													100			66			314				100
II	Mantella betsileo	live		TW																																	100						150					250
II	Mantella betsileo	live		UA																																					20		195
II	Mantella betsileo	live		US																										1212	2430	900	1090	2392	2055	1635	1430	1839	1366	3328	1930	1918	2712	1750	1160	1367	1346	2118
II	Mantella betsileo	specimens	ml	US																														9
II	Mantella betsileo	specimens		CA																										1
II	Mantella betsileo	specimens		DE																															50
II	Mantella betsileo	specimens		FR																																					3					8
II	Mantella betsileo	specimens		IT																																					3
II	Mantella betsileo	specimens		US																										32	4		17	21		9				10								14
II	Mantella cowanii	bodies		US																														2
II	Mantella cowanii	live		CA																												210	50
II	Mantella cowanii	live		CH																												60	30	100
II	Mantella cowanii	live		DE																												20
II	Mantella cowanii	live		FR																											15
II	Mantella cowanii	live		HU																										10
II	Mantella cowanii	live		IT																													10
II	Mantella cowanii	live		JP																										2	70			20
II	Mantella cowanii	live		SV																												200
II	Mantella cowanii	live		US																										415	890	1030	420
II	Mantella cowanii	specimens	mg	GB																																									26
II	Mantella cowanii	specimens	mg	US																																								9
II	Mantella cowanii	specimens	ml	US																														2
II	Mantella cowanii	specimens		DE																															50
II	Mantella cowanii	specimens		IT																													50
II	Mantella cowanii	specimens		US																														2										9		5	4
II	Mantella crocea	bodies		DE																											5									10
II	Mantella crocea	bodies		US																														4		4									1
II	Mantella crocea	live		CA																										18	130	130		275	251	110	60	188
II	Mantella crocea	live		CH																																10		10
II	Mantella crocea	live		CN																										3					50		50										53
II	Mantella crocea	live		CS																														50
II	Mantella crocea	live		DE																															60
II	Mantella crocea	live		FR																																											4	6
II	Mantella crocea	live		GB																												100
II	Mantella crocea	live		HK																																											24
II	Mantella crocea	live		JP																										100	350		25	396	170	216	116	118	83
II	Mantella crocea	live		NL																																		75			25			30			50
II	Mantella crocea	live		RU																																				12
II	Mantella crocea	live		SE																																						3					13
II	Mantella crocea	live		TH																										10	20					37	23		50
II	Mantella crocea	live		TW																																54	77
II	Mantella crocea	live		US																										1047	1270	400	100	1902	2030	465	314	405	303		5	25	6	12	4		4
II	Mantella crocea	live		XX																																	26
II	Mantella crocea	specimens	mg	US																																								46		215
II	Mantella crocea	specimens		DE																																								42
II	Mantella crocea	specimens		IT																																								6
II	Mantella crocea	specimens		US																														4										31	69	319
II	Mantella ebenaui	bodies		DE																																				2			3
II	Mantella ebenaui	bodies		JP																																									1
II	Mantella ebenaui	specimens		US																																					3
II	Mantella expectata	bodies		DE																															2
II	Mantella expectata	bodies		IT																														19	90
II	Mantella expectata	bodies		US																														3
II	Mantella expectata	live		CA																										50	100	410	203	1218	1006	135	70	224	40					29
II	Mantella expectata	live		CH																										20	40	55		80	42	10		10					29	6	14
II	Mantella expectata	live		CN																														30													41
II	Mantella expectata	live		CS																														60
II	Mantella expectata	live		DE																												20			60		10		2
II	Mantella expectata	live		FR																										50	15													19	7		9	30
II	Mantella expectata	live		HK																												200												10			17
II	Mantella expectata	live		HU																										20
II	Mantella expectata	live		IT																																	10
II	Mantella expectata	live		JP																										100	435	50	25	150	145	183	30	150	17			69	76	25			40	33
II	Mantella expectata	live		MX																														20
II	Mantella expectata	live		NL																																		50	31				80	25			20
II	Mantella expectata	live		RU																										20										12			29
II	Mantella expectata	live		SE																																													5
II	Mantella expectata	live		TH																										10	20	100	50	100		33	92		50
II	Mantella expectata	live		TW																													10	12	117	54	37	134						4	4
II	Mantella expectata	live		US																										1010	1200	1800	851	2795	1385	566	357	175	234			45	80	44	4		28	20
II	Mantella expectata	live		XX																																	25
II	Mantella expectata	specimens	ml	US																														2
II	Mantella expectata	specimens		DE																																								26
II	Mantella expectata	specimens		FR																																					2
II	Mantella expectata	specimens		US																														3
II	Mantella haraldmeieri	bodies		DE																														1
II	Mantella haraldmeieri	bodies		US																														8
II	Mantella haraldmeieri	live		CS																														60
II	Mantella haraldmeieri	live		JP																											40			20
II	Mantella haraldmeieri	live		MX																														20
II	Mantella haraldmeieri	live		US																										240	270	380	350	590
II	Mantella haraldmeieri	specimens	ml	US																														2
II	Mantella haraldmeieri	specimens		DE																															50
II	Mantella haraldmeieri	specimens		US																														8					5
II	Mantella laevigata	bodies		DE																															4												1
II	Mantella laevigata	bodies		US																											5			7		8									23
II	Mantella laevigata	eggs		US																																										50
II	Mantella laevigata	live		BD																											100
II	Mantella laevigata	live		CA																										50	307	106	127	164	372	165	120	268	80	174
II	Mantella laevigata	live		CH																											20	25			12		20	35	93	88
II	Mantella laevigata	live		CL																																			50
II	Mantella laevigata	live		CN																										3				30	112					16
II	Mantella laevigata	live		CS																														50
II	Mantella laevigata	live		CZ																											20
II	Mantella laevigata	live		DE																												20			50					119
II	Mantella laevigata	live		DK																													10						70
II	Mantella laevigata	live		ES																											20
II	Mantella laevigata	live		GB																												150				10
II	Mantella laevigata	live		HK																											12
II	Mantella laevigata	live		IT																																	25
II	Mantella laevigata	live		JP																										150	450		25	140	115	145	70	203	55	148
II	Mantella laevigata	live		KR																													6
II	Mantella laevigata	live		LV																																							6
II	Mantella laevigata	live		MX																																	50
II	Mantella laevigata	live		NL																																12	12
II	Mantella laevigata	live		RS																																			40
II	Mantella laevigata	live		RU																																				20
II	Mantella laevigata	live		SV																											6	10
II	Mantella laevigata	live		TH																										10	30			150		33			122
II	Mantella laevigata	live		TW																															36	30	163	214
II	Mantella laevigata	live		US																										2377	1985	865	1481	4077	2625	814	610	1074	687	695					10
II	Mantella laevigata	live		XX																																	24
II	Mantella laevigata	specimens	mg	US																														2
II	Mantella laevigata	specimens	ml	US																														5
II	Mantella laevigata	specimens		DE																															50											23
II	Mantella laevigata	specimens		GB																																										90
II	Mantella laevigata	specimens		US																														9											80	40
II	Mantella madagascariensis	bodies		DE																											4		3	1
II	Mantella madagascariensis	bodies		US																													2	8		6
II	Mantella madagascariensis	live		BD																											100
II	Mantella madagascariensis	live		CA																										216	295	766	106	790	756	63	37	126		38	5						20	6
II	Mantella madagascariensis	live		CH																										62	102	60	25	161		34	34			42	16	10	24	10				10
II	Mantella madagascariensis	live		CN																										3				60	30	46	37										56
II	Mantella madagascariensis	live		CS																														50
II	Mantella madagascariensis	live		CZ																											20									11	22	20	24	11	20	20	9
II	Mantella madagascariensis	live		DE																											100	22			100	25	17			11	14	18				10
II	Mantella madagascariensis	live		DK																													10		18				52
II	Mantella madagascariensis	live		ES																											50
II	Mantella madagascariensis	live		FR																										130	20													23	33	10	9
II	Mantella madagascariensis	live		GB																												100														10
II	Mantella madagascariensis	live		GT																															2
II	Mantella madagascariensis	live		HK																										12		200															25	19
II	Mantella madagascariensis	live		HU																										25
II	Mantella madagascariensis	live		IT																													20										8
II	Mantella madagascariensis	live		JP																										227	590	80	25	189	136	95	45	38	38	51	19	18	31	24	21	10	11	30
II	Mantella madagascariensis	live		KR																													6			8
II	Mantella madagascariensis	live		MX																												50	16	20
II	Mantella madagascariensis	live		NL																																		25		20			58	115	130	15	55
II	Mantella madagascariensis	live		PH																																												10
II	Mantella madagascariensis	live		RU																										20										39						30	10	10
II	Mantella madagascariensis	live		SE																																											5
II	Mantella madagascariensis	live		SV																											7	370
II	Mantella madagascariensis	live		TH																										10	60	100	50	150		33			36
II	Mantella madagascariensis	live		TW																													5		55	68	18	20						6	32
II	Mantella madagascariensis	live		US																										5730	7545	4335	4673	5497	2455	222	155	117	148	214	20	46	24	45	54	65	49	29
II	Mantella madagascariensis	specimens	mg	US																											4			3										2
II	Mantella madagascariensis	specimens		CN																																									1
II	Mantella madagascariensis	specimens		DE																															20
II	Mantella madagascariensis	specimens		US																											1		2	11										2	3		11
II	Mantella manery	bodies		DE																																											1
II	Mantella manery	specimens		DE																																										2			2
II	Mantella milotympanum	bodies		DE																													2		5
II	Mantella milotympanum	bodies		US																														10		11									1
II	Mantella milotympanum	live		CA																												310	450	200	133	115	80	193	74
II	Mantella milotympanum	live		CH																																25
II	Mantella milotympanum	live		CN																															97		86
II	Mantella milotympanum	live		DE																															75		10								8
II	Mantella milotympanum	live		FI																																									8
II	Mantella milotympanum	live		JP																														100	45	150	100	118	49
II	Mantella milotympanum	live		NL																																20	20
II	Mantella milotympanum	live		SV																												200
II	Mantella milotympanum	live		TH																																37			50
II	Mantella milotympanum	live		TW																														50	135	112	157
II	Mantella milotympanum	live		US																												760	1330	2025	1475	267	366	378	211
II	Mantella milotympanum	live		XX																																	11
II	Mantella milotympanum	specimens	mg	US																																								40		30
II	Mantella milotympanum	specimens	ml	US																														2
II	Mantella milotympanum	specimens		DE																															100
II	Mantella milotympanum	specimens		FR																																						10
II	Mantella milotympanum	specimens		US																														10										22	225	45
II	Mantella nigricans	bodies		DE																															2					8
II	Mantella nigricans	bodies		IT																																4
II	Mantella nigricans	bodies		NL																											2
II	Mantella nigricans	bodies		US																											5			6
II	Mantella nigricans	live		CA																														100	100	63	40	100	30	94	13	85	115	125				4
II	Mantella nigricans	live		CH																																6	6	20		227	347	80	150	100	92	42		20
II	Mantella nigricans	live		CN																																	60								91
II	Mantella nigricans	live		CZ																																				80	184	314	270	340	191	100	50	90	40
II	Mantella nigricans	live		DE																															50					328	364	212				30	105	30
II	Mantella nigricans	live		DK																																			70
II	Mantella nigricans	live		ES																																											50	297	297
II	Mantella nigricans	live		FR																																					88	183			80	22
II	Mantella nigricans	live		GB																																										30
II	Mantella nigricans	live		HK																																								10	150
II	Mantella nigricans	live		HU																																									40	32	50	50	57
II	Mantella nigricans	live		ID																																									15	15
II	Mantella nigricans	live		IE																																											80
II	Mantella nigricans	live		IT																																							4
II	Mantella nigricans	live		JP																															95	40	40	134	49	69	476	200	150	199	330	275	90	137
II	Mantella nigricans	live		NL																																		25		150	156	69	172	162	100	100	88	102	75
II	Mantella nigricans	live		RU																																				27		12				120
II	Mantella nigricans	live		TH																																			71	34			30
II	Mantella nigricans	live		TW																																	67	10					100					250
II	Mantella nigricans	live		UA																																							10
II	Mantella nigricans	live		US																											5			650	200	432	336	366	329	1074	450	456	715	488	736	735	721	917
II	Mantella nigricans	live		XX																																	30
II	Mantella nigricans	specimens	ml	US																														4
II	Mantella nigricans	specimens		DE																															50
II	Mantella nigricans	specimens		US																														6										1			4
II	Mantella pulchra	bodies		DE																																3
II	Mantella pulchra	bodies		NL																											2
II	Mantella pulchra	bodies		US																														8		4
II	Mantella pulchra	bodies		ZA																																5
II	Mantella pulchra	live		CA																										100	242	310	103	640	650	340	115	360	122	229	31	23	48	50	20
II	Mantella pulchra	live		CH																										20	60			190				20	200	160	119	46	55	35	22	22
II	Mantella pulchra	live		CN																														30						45							18
II	Mantella pulchra	live		CS																														60
II	Mantella pulchra	live		DE																												20			62	25				390
II	Mantella pulchra	live		DK																													2		12
II	Mantella pulchra	live		ES																											30
II	Mantella pulchra	live		FR																										75	15												10	17				3
II	Mantella pulchra	live		GB																												50
II	Mantella pulchra	live		HK																										10	12													30			10
II	Mantella pulchra	live		JP																										100	565		25	130	185	111	78	305	110	267	158	105	36	33	36		6	25
II	Mantella pulchra	live		MX																												50	12	20			100
II	Mantella pulchra	live		NL																																55	65	55		10			123	113			20
II	Mantella pulchra	live		RS																																			80
II	Mantella pulchra	live		RU																										20										57		32				67
II	Mantella pulchra	live		SE																																						8
II	Mantella pulchra	live		SV																											6	20
II	Mantella pulchra	live		TH																											50	100	100	50		50	65		233	50
II	Mantella pulchra	live		TW																																	100	200				10			6			15
II	Mantella pulchra	live		UA																																							20
II	Mantella pulchra	live		US																										2982	3500	2490	2430	4485	2720	1496	931	1568	1175	1182	99	264	155	138	114	171	141	122
II	Mantella pulchra	live		XX																																	84
II	Mantella pulchra	live		ZA																																											10	35
II	Mantella pulchra	specimens		US																														5		1											10
II	Mantella spp.	bodies		DE																											3		8		5	6	5	11		2
II	Mantella spp.	bodies		IT																													27	32	201	6
II	Mantella spp.	bodies		NL																											1
II	Mantella spp.	bodies		US																										19															6
II	Mantella spp.	live		BD																											50
II	Mantella spp.	live		CA																							4		12		50
II	Mantella spp.	live		CH																														40
II	Mantella spp.	live		CL																										12
II	Mantella spp.	live		CZ																											20
II	Mantella spp.	live		DK																									60
II	Mantella spp.	live		FR																																							26
II	Mantella spp.	live		GB																							30					100
II	Mantella spp.	live		JP																											150		75	65
II	Mantella spp.	live		MX																												50	12
II	Mantella spp.	live		RU																										20
II	Mantella spp.	live		US																										6780	9683	1400	1291	575	200	20			2
II	Mantella spp.	specimens	mg	GB																																									2
II	Mantella spp.	specimens	mg	US																														3										144		5
II	Mantella spp.	specimens		BE																																								49
II	Mantella spp.	specimens		DE																																													1
II	Mantella spp.	specimens		ES																																										31
II	Mantella spp.	specimens		IT																													91
II	Mantella spp.	specimens		US																										2	17			3					5					3	401		15
II	Mantella viridis	bodies		DE																													3	3			5			8
II	Mantella viridis	bodies		IT																															46
II	Mantella viridis	bodies		US																														10		1		5
II	Mantella viridis	live		BM																																					30							37
II	Mantella viridis	live		CA																										66	200	360	200	275	200	185	40	84	20
II	Mantella viridis	live		CH																										20	20			50			20	20						7
II	Mantella viridis	live		CN																														30	30	42	40
II	Mantella viridis	live		CS																														50
II	Mantella viridis	live		DE																												20			50			20	30
II	Mantella viridis	live		DK																															12
II	Mantella viridis	live		FR																											15												6	10	7			30
II	Mantella viridis	live		GB																												100
II	Mantella viridis	live		JP																											470	50	25	164	150	118	88	147	62					6			16	22
II	Mantella viridis	live		MX																												50	12	20
II	Mantella viridis	live		NL																																120	130	25	35	82			70	65	40	10
II	Mantella viridis	live		RU																										20
II	Mantella viridis	live		SV																												400
II	Mantella viridis	live		TH																										10	20	100	100				46		80
II	Mantella viridis	live		TW																													10			42	67					5			10
II	Mantella viridis	live		US																										1883	3135	1535	1740	1522	910	332	292	458	241	20		19	20	2			12	20
II	Mantella viridis	live		XX																																	20
II	Mantella viridis	specimens	mg	US																																								4
II	Mantella viridis	specimens	ml	US																														7
II	Mantella viridis	specimens		DE																														5	50
II	Mantella viridis	specimens		US																													2	10										6
II	Minyobates spp.	live		US																															6
II	Oophaga arborea	live		DE																1	1
II	Oophaga arborea	live		ID																						20
II	Oophaga arborea	live		SG																						20	4
II	Oophaga arborea	live		US																	8	36		3									14
II	Oophaga granulifera	bodies		DE																			32	10															5
II	Oophaga granulifera	bodies		NL														10	150
II	Oophaga granulifera	live		CA																																								11			4	4
II	Oophaga granulifera	live		DE															3			6		10
II	Oophaga granulifera	live		DK																								4
II	Oophaga granulifera	live		NL														11	13
II	Oophaga granulifera	live		US																			10	1			10													9	12
II	Oophaga granulifera	specimens		DE																																		145	200
II	Oophaga histrionica	bodies		PA																		10
II	Oophaga histrionica	bodies		US														8				10
II	Oophaga histrionica	eggs		CH																											60
II	Oophaga histrionica	live		AT																																											30
II	Oophaga histrionica	live		BE																				205		200	350
II	Oophaga histrionica	live		CA																					1		52																				19	5	9
II	Oophaga histrionica	live		CH																							100				72															4		2	2
II	Oophaga histrionica	live		DE															150							150	35			25														11			21	8
II	Oophaga histrionica	live		DK															47																												14	25	25
II	Oophaga histrionica	live		ES															25					10			12																						17
II	Oophaga histrionica	live		FR																					36	36	73																3	2	1
II	Oophaga histrionica	live		IT																							20
II	Oophaga histrionica	live		JP																				40	20	25	89	15													19	19	2	6			9
II	Oophaga histrionica	live		NL																																							50	15
II	Oophaga histrionica	live		SK																																											30	47
II	Oophaga histrionica	live		TW																																						8
II	Oophaga histrionica	live		US													10					25		1231	1430	585	1570		16	5	87				9	10	14	53	83	26	3	95	51	66	30	131	45	169
II	Oophaga histrionica	live		XX																																												41
II	Oophaga histrionica	specimens		DE																																								15
II	Oophaga histrionica	specimens		US																																				16			31
II	Oophaga lehmanni	eggs		CH																											20
II	Oophaga lehmanni	live		AT																																											13
II	Oophaga lehmanni	live		CA																																										8	8
II	Oophaga lehmanni	live		CH																											24														7	9		3
II	Oophaga lehmanni	live		DE																																											8	6
II	Oophaga lehmanni	live		DK																																											9	11	11
II	Oophaga lehmanni	live		ES																																													3
II	Oophaga lehmanni	live		JP																																											3
II	Oophaga lehmanni	live		SK																																											13	19
II	Oophaga lehmanni	live		US																				30																					49	66	7	10
II	Oophaga lehmanni	live		XX																																												13
II	Oophaga lehmanni	specimens		US																																				14
II	Oophaga pumilio	bodies		CA																						2
II	Oophaga pumilio	bodies		DE																			7														3	6								2
II	Oophaga pumilio	bodies		US														100	123	18															30	77	1
II	Oophaga pumilio	derivatives		US																																					469
II	Oophaga pumilio	eggs		US																							100		100														27
II	Oophaga pumilio	live		AE																																									7			12
II	Oophaga pumilio	live		AG																																												5
II	Oophaga pumilio	live		BE																				250	147	51	100												24		1400	2700	2250	3100	500	200	200
II	Oophaga pumilio	live		CA																			53	20	10	14	18		92	89	75		9	22	462	193	100	151	30	356	3	70	198	15	100	170	235	204	81
II	Oophaga pumilio	live		CH															20					2			295							180	16	24	60	162	306	320	122	180	6	99	119	61		10
II	Oophaga pumilio	live		CL																														50				12		100			60	45
II	Oophaga pumilio	live		CN																																	5						76
II	Oophaga pumilio	live		CW																																				50
II	Oophaga pumilio	live		CZ																																							60
II	Oophaga pumilio	live		DE														8	20	4	8	8	208	133	146	78	130	6	600	362	4				215	258	92	347	1015	1764	1204	852	7	84	200	305			300
II	Oophaga pumilio	live		DK															75								22	4																	300	610
II	Oophaga pumilio	live		EC																																									24
II	Oophaga pumilio	live		ES																			7	20	215	270	190		70					200		1600			208	105	400		60	300	750	1160	700	500
II	Oophaga pumilio	live		FR																					36	81	12		110					20	480	100	300	307	150	175	25		189			40	40
II	Oophaga pumilio	live		GB													350			20		65	10	30		50							5	165	57	45	104	50				60	60		572	593	5		125
II	Oophaga pumilio	live		GT																																1			1								12	12
II	Oophaga pumilio	live		HK																																							148
II	Oophaga pumilio	live		HU																																									650
II	Oophaga pumilio	live		ID																																					2
II	Oophaga pumilio	live		IS																																6									10	10
II	Oophaga pumilio	live		IT																						25								100		20		40	20		50
II	Oophaga pumilio	live		JE																															20
II	Oophaga pumilio	live		JP																			74	62	75	190	45		702	305	45			330	117	82	43	74	9	281	337	283	639	1077	644	1060	763	431
II	Oophaga pumilio	live		KR																																10	22		12	9	8		18		92	58	48
II	Oophaga pumilio	live		MD																																											200
II	Oophaga pumilio	live		MX																										40							3				40		50	50	12	8
II	Oophaga pumilio	live		MY																															16	20		4				8
II	Oophaga pumilio	live		NL													412	502	500								290		350		12				25		20	20			200				11	11
II	Oophaga pumilio	live		NO																																				4
II	Oophaga pumilio	live		PH																																						50				24
II	Oophaga pumilio	live		PL																									10					60
II	Oophaga pumilio	live		RU																																					10
II	Oophaga pumilio	live		SE																			12
II	Oophaga pumilio	live		SG																						19				3
II	Oophaga pumilio	live		SK																																										500			300
II	Oophaga pumilio	live		TH																														100	100		100		2		6	6	36	51	12	75
II	Oophaga pumilio	live		TW																														135	122	104	55	87	25	48	269	34	12	254	110		30	50	11
II	Oophaga pumilio	live		UA																																						50					750
II	Oophaga pumilio	live		US													20	20	60		30	440	1616	2091	2307	7309	1291	669	3302	3518	1117	28	10	1796	2399	4402	3084	3647	3053	2587	1703	2801	3150	3379	3778	3152	4065	3470
II	Oophaga pumilio	live		XX																				10							25					700									12	200
II	Oophaga pumilio	live		ZA																											10							10			12
II	Oophaga pumilio	specimens		AU																																						6
II	Oophaga pumilio	specimens		CO																																						60
II	Oophaga pumilio	specimens		CR																																				226
II	Oophaga pumilio	specimens		DE																														426		268	35	201	139	226	271	95			15		80
II	Oophaga pumilio	specimens		ES																																											2
II	Oophaga pumilio	specimens		GB																																												1
II	Oophaga pumilio	specimens		PA																																			33
II	Oophaga pumilio	specimens		SE																															400		600		1						105
II	Oophaga pumilio	specimens		US																			32					2							4	24	64	18	139	397	160			120	10		175
II	Oophaga speciosa	live		DE															5	2	8
II	Oophaga speciosa	live		JP																								20
II	Oophaga speciosa	live		US													5				10	44
II	Oophaga speciosa	specimens		ZA																										4
II	Oophaga spp.	live		KR																																										12
II	Oophaga spp.	live		XX																																										12
II	Oophaga sylvatica	bodies		PA																		10
II	Oophaga sylvatica	bodies		US														8				10
II	Oophaga sylvatica	eggs		CH																											60
II	Oophaga sylvatica	live		BE																				205		200	350
II	Oophaga sylvatica	live		CA																					1		52														50				115
II	Oophaga sylvatica	live		CH																							100				72
II	Oophaga sylvatica	live		DE															150							150	35			25																20
II	Oophaga sylvatica	live		DK															47																									25		9	50	12	23
II	Oophaga sylvatica	live		ES															25					10			12
II	Oophaga sylvatica	live		FR																					36	36	73																	2	26
II	Oophaga sylvatica	live		GB																																								16	12
II	Oophaga sylvatica	live		IT																							20
II	Oophaga sylvatica	live		JP																				40	20	25	89	15													19	19		20	20	23	7	4
II	Oophaga sylvatica	live		KR																																										2
II	Oophaga sylvatica	live		NL																																							136		106				21
II	Oophaga sylvatica	live		US													10					25		1231	1430	585	1570		16	5	87				9	10	14	53	83	26	3			8	109	41	121	64
II	Oophaga sylvatica	specimens		US																																				16			184	60	50	52	343
II	Oophaga vicentei	live		US																															2										103
II	Oophaga vicentei	specimens		US																															1
II	Oophaga vicentei	unspecified		US																																										7
II	Paramesotriton labiatus	live		DE																																													100
II	Phyllobates aurotaenia	live		CA																								35															70	54			32
II	Phyllobates aurotaenia	live		CN																																											4
II	Phyllobates aurotaenia	live		DE																										10	36
II	Phyllobates aurotaenia	live		DK																																												8	8
II	Phyllobates aurotaenia	live		FR																																								18
II	Phyllobates aurotaenia	live		GB																							4
II	Phyllobates aurotaenia	live		HU																									7
II	Phyllobates aurotaenia	live		JP																								6	30		15									4			27	40	6			27
II	Phyllobates aurotaenia	live		NL																																								24					30
II	Phyllobates aurotaenia	live		PL																											20
II	Phyllobates aurotaenia	live		SE																																													4
II	Phyllobates aurotaenia	live		TW																																									2	6			10
II	Phyllobates aurotaenia	live		US																							85	16	7	15													11	44	60	59	10	9
II	Phyllobates aurotaenia	specimens		US																																				2					20	54		6
II	Phyllobates aurotaenia	specimens		ZA																										4
II	Phyllobates bicolor	live		CA																	10	26			2		6	34	10								4		4		6						76
II	Phyllobates bicolor	live		CH																																							4
II	Phyllobates bicolor	live		DE																						12		20	42	10		10		8									10
II	Phyllobates bicolor	live		DK																				2																								3	3
II	Phyllobates bicolor	live		JP																							110	85	54	15	75	20			5			6		9	37	10	34	6		35		30	5
II	Phyllobates bicolor	live		KR																																				5						8
II	Phyllobates bicolor	live		MX																														20			12
II	Phyllobates bicolor	live		NL																		8	2	8	7														10
II	Phyllobates bicolor	live		PA																																									20
II	Phyllobates bicolor	live		PH																																						25
II	Phyllobates bicolor	live		SE																			4
II	Phyllobates bicolor	live		SG																											2
II	Phyllobates bicolor	live		TH																														100	100
II	Phyllobates bicolor	live		TR																																							8
II	Phyllobates bicolor	live		TW																														26	10				27
II	Phyllobates bicolor	live		US																		44		56	46	70	70	53	75	20									20				50			114	56	95
II	Phyllobates bicolor	live		ZA																																20		10
II	Phyllobates bicolor	specimens		CA																										1
II	Phyllobates bicolor	specimens		US																																										11		12
II	Phyllobates lugubris	bodies		US														20	15
II	Phyllobates lugubris	live		CA																																								15
II	Phyllobates lugubris	live		CR																			4
II	Phyllobates lugubris	live		DE																								4
II	Phyllobates lugubris	live		JP																							6	10		5				16	6					43					6
II	Phyllobates lugubris	live		NL														3				13
II	Phyllobates lugubris	live		SE																			3																						4
II	Phyllobates lugubris	live		US																		12					10	10		20	4				8				15	2	12				28		16
II	Phyllobates lugubris	specimens	g	US																		200
II	Phyllobates lugubris	specimens		DE																																		2	2			95
II	Phyllobates lugubris	specimens		PA																																			6
II	Phyllobates lugubris	specimens		US																			11															11						19			10
II	Phyllobates lugubris	unspecified		US																																										7
II	Phyllobates spp.	bodies		US																									3
II	Phyllobates spp.	live		CA																		10
II	Phyllobates spp.	live		DE																							10	4
II	Phyllobates spp.	live		NL																		19
II	Phyllobates spp.	live		US														1020		50		24	107	10				8			42
II	Phyllobates spp.	specimens		GB																												3
II	Phyllobates spp.	specimens		NL																			2
II	Phyllobates spp.	specimens		SE																															2
II	Phyllobates spp.	specimens		US																																												65
II	Phyllobates terribilis	bodies		GB																																										5
II	Phyllobates terribilis	derivatives	mg	BE																																								0.9
II	Phyllobates terribilis	derivatives	mg	CA																																		0.1				0.1
II	Phyllobates terribilis	derivatives	mg	CH																																											10
II	Phyllobates terribilis	derivatives	mg	FR																																	176
II	Phyllobates terribilis	derivatives	mg	IL																																							0.01
II	Phyllobates terribilis	derivatives	mg	US																																	0.2	20.20	0.06	1.02	15.3	5.08	11
II	Phyllobates terribilis	derivatives	mg	UZ																																		0.02
II	Phyllobates terribilis	derivatives		BE																																						27
II	Phyllobates terribilis	derivatives		US																																		4	2
II	Phyllobates terribilis	extract	g	BE																																												0.000003
II	Phyllobates terribilis	extract	mg	BE																																						0.48	0.03	0.11		1
II	Phyllobates terribilis	extract	mg	JP																																						1
II	Phyllobates terribilis	extract	mg	TW																																						1.5
II	Phyllobates terribilis	extract	mg	US																																										7
II	Phyllobates terribilis	extract		BE																																										26		1
II	Phyllobates terribilis	extract		JP																																							2
II	Phyllobates terribilis	live		AE																																										10
II	Phyllobates terribilis	live		AN																																		15
II	Phyllobates terribilis	live		AT																									21
II	Phyllobates terribilis	live		BE																											17							7
II	Phyllobates terribilis	live		CA																							5	79	18	29			10				5	4	85				77	71	2
II	Phyllobates terribilis	live		CH																																3	4		8	14			2	20	5	21	5
II	Phyllobates terribilis	live		CN																																										16	93
II	Phyllobates terribilis	live		CO																													5
II	Phyllobates terribilis	live		CZ																				26										5			12		12
II	Phyllobates terribilis	live		DE																		20					20	80	20	6	4	27		10					4	4	4	4
II	Phyllobates terribilis	live		DK																										8																		8	8
II	Phyllobates terribilis	live		EC																															5
II	Phyllobates terribilis	live		ES																																													3
II	Phyllobates terribilis	live		FR																																		12				12	20	96		6	3
II	Phyllobates terribilis	live		GB														30									5		15	26			15	23	10		13	5			4	6							9
II	Phyllobates terribilis	live		HK																																							2				20
II	Phyllobates terribilis	live		HR																																					10
II	Phyllobates terribilis	live		HU																													8
II	Phyllobates terribilis	live		ID																																		12
II	Phyllobates terribilis	live		IL																													8
II	Phyllobates terribilis	live		JE																																								9					10
II	Phyllobates terribilis	live		JP																								6	45	10	36	21	34	48	22	14	8	12	33	88	100	107	166	85	71	203	101	94	20
II	Phyllobates terribilis	live		KR																																				51	9				6	285	22		6
II	Phyllobates terribilis	live		LV																										8			8					6
II	Phyllobates terribilis	live		MX																																	5
II	Phyllobates terribilis	live		MY																																								10					10
II	Phyllobates terribilis	live		NL																30												8								50	50	20		64	60	45	70	10
II	Phyllobates terribilis	live		PH																																						25			30			19
II	Phyllobates terribilis	live		PL																															10
II	Phyllobates terribilis	live		RU																																						2
II	Phyllobates terribilis	live		SE																												6							12	12					6
II	Phyllobates terribilis	live		SG																											4															10	5	11
II	Phyllobates terribilis	live		TH																														100	100
II	Phyllobates terribilis	live		TR																																							10		10	15	6
II	Phyllobates terribilis	live		TW																																	15	12	20	23	17			54	30	33	35	50	25
II	Phyllobates terribilis	live		US																							244	55	152	96	25								110	178	34	18	77	143	27	47	76	167
II	Phyllobates terribilis	live		XX														4																											13	24
II	Phyllobates terribilis	live		ZA																											20					40	15	10			12
II	Phyllobates terribilis	specimens	g	JP																																							0.00002	0.02	0.00012	0.0001
II	Phyllobates terribilis	specimens	kg	JP																																									0.00000012
II	Phyllobates terribilis	specimens	kg	US																																									0.00000030
II	Phyllobates terribilis	specimens	mg	CH																																							0.24	0.01		0.01	20	20
II	Phyllobates terribilis	specimens	mg	FR																																					6
II	Phyllobates terribilis	specimens	mg	HK																																												1
II	Phyllobates terribilis	specimens	mg	IL																																										0.1
II	Phyllobates terribilis	specimens	mg	IN																																											0.5
II	Phyllobates terribilis	specimens	mg	JP																																							0.02	0.2		0.1		0.02
II	Phyllobates terribilis	specimens	mg	TW																																							0.03
II	Phyllobates terribilis	specimens	mg	US																																		1			1		1.2	5.22	5.48	7.33	4.73	0.100000001
II	Phyllobates terribilis	specimens	microgrammes	CH																																							120	10
II	Phyllobates terribilis	specimens	ml	US																																					5
II	Phyllobates terribilis	specimens		BE																																							10	125
II	Phyllobates terribilis	specimens		GB																																												3
II	Phyllobates terribilis	specimens		JP																																								1
II	Phyllobates terribilis	specimens		US																																	1			3		1
II	Phyllobates terribilis	specimens		XX																																		3
II	Phyllobates terribilis	unspecified		US																																							1
II	Phyllobates vittatus	bodies		CA																																								1
II	Phyllobates vittatus	bodies		DE																			4
II	Phyllobates vittatus	live		AT																							20
II	Phyllobates vittatus	live		BY																																								10
II	Phyllobates vittatus	live		CA																		19						27		6																			4
II	Phyllobates vittatus	live		CH																							30
II	Phyllobates vittatus	live		CL																														20
II	Phyllobates vittatus	live		CN																																											4
II	Phyllobates vittatus	live		CR																			13
II	Phyllobates vittatus	live		DE															50						10	10	72	20	20		51	15
II	Phyllobates vittatus	live		DK															3
II	Phyllobates vittatus	live		FI																						8
II	Phyllobates vittatus	live		FR																			3						75													8
II	Phyllobates vittatus	live		GB																					10
II	Phyllobates vittatus	live		GE																																	10
II	Phyllobates vittatus	live		GH																																6
II	Phyllobates vittatus	live		HK																				6
II	Phyllobates vittatus	live		HR																																					10
II	Phyllobates vittatus	live		HU																					10
II	Phyllobates vittatus	live		ID																									5
II	Phyllobates vittatus	live		IT																						50			100
II	Phyllobates vittatus	live		JE																																	10
II	Phyllobates vittatus	live		JP														25	16				35		16	10	20	392	40	24	94		20		16	8	6	7	6	6		11	10	10	13	20	34	26
II	Phyllobates vittatus	live		KR																									4																	20
II	Phyllobates vittatus	live		LV																																									5
II	Phyllobates vittatus	live		MX																							10							15
II	Phyllobates vittatus	live		MY																															10														7
II	Phyllobates vittatus	live		NL														2				2									7		6			20	20						10	10	7	7		10	10
II	Phyllobates vittatus	live		NO																						8	8
II	Phyllobates vittatus	live		PH																																									20	5		20
II	Phyllobates vittatus	live		RU																																						1
II	Phyllobates vittatus	live		SE																			3	11						120		10	30
II	Phyllobates vittatus	live		SG																										4															2			6
II	Phyllobates vittatus	live		TG																													4
II	Phyllobates vittatus	live		TH																													50	50	50	50
II	Phyllobates vittatus	live		TR																																										15
II	Phyllobates vittatus	live		TW																												20	19						4	4		33							20
II	Phyllobates vittatus	live		US													25						37	190	160	95	100	203	324	254	110	12				2					8	4	17	4	4	10	15	4
II	Phyllobates vittatus	live		UZ																																19
II	Phyllobates vittatus	live		XX																																									2
II	Phyllobates vittatus	live		ZA																																20
II	Phyllobates vittatus	specimens		US																																									1
II	Ranitomeya amazonica	extract	l	US																																											0.01
II	Ranitomeya amazonica	live		AE																																									4
II	Ranitomeya amazonica	live		CA																																											58	19
II	Ranitomeya amazonica	live		CH																																												4
II	Ranitomeya amazonica	live		CN																																											160
II	Ranitomeya amazonica	live		DE																																							13
II	Ranitomeya amazonica	live		FR																																							37	12	35	18	39	30
II	Ranitomeya amazonica	live		GB																																											6		6
II	Ranitomeya amazonica	live		HK																																											10
II	Ranitomeya amazonica	live		JE																																									8	8
II	Ranitomeya amazonica	live		JP																																		8			40		14	44	54	15	44	37	10
II	Ranitomeya amazonica	live		KR																																										2	4
II	Ranitomeya amazonica	live		MY																																											10
II	Ranitomeya amazonica	live		NL																																							66	40	201	40	85	20	10
II	Ranitomeya amazonica	live		PH																																												14
II	Ranitomeya amazonica	live		SE																																							6		2		2
II	Ranitomeya amazonica	live		SG																																										5
II	Ranitomeya amazonica	live		TH																														20
II	Ranitomeya amazonica	live		TW																																							16			8			12
II	Ranitomeya amazonica	live		US																																6								70	37	15	202	145
II	Ranitomeya amazonica	specimens	ml	US																																											10
II	Ranitomeya amazonica	specimens		GB																																												1
II	Ranitomeya amazonica	specimens		US																														6
II	Ranitomeya benedicta	derivatives		JP																																										8
II	Ranitomeya benedicta	live		AE																																									4
II	Ranitomeya benedicta	live		CH																																									4			4	4
II	Ranitomeya benedicta	live		CN																																											8
II	Ranitomeya benedicta	live		FR																																										2
II	Ranitomeya benedicta	live		HK																																											2
II	Ranitomeya benedicta	live		JP																																							25		20	56	6	15	14
II	Ranitomeya benedicta	live		KR																																								6	17	20	2		3
II	Ranitomeya benedicta	live		NL																																									5			13
II	Ranitomeya benedicta	live		PH																																												10
II	Ranitomeya benedicta	live		SE																																													6
II	Ranitomeya benedicta	live		TW																																									15	17	15		21
II	Ranitomeya benedicta	live		US																																									2	6	46	43
II	Ranitomeya cyanovittata	extract	l	US																																											0.01
II	Ranitomeya cyanovittata	specimens	ml	US																																											10
II	Ranitomeya cyanovittata	specimens		US																																												33
II	Ranitomeya defleri	extract	l	US																																											0.01
II	Ranitomeya defleri	specimens	ml	US																																											10
II	Ranitomeya defleri	specimens		US																																												5
II	Ranitomeya fantastica	bodies		US																													1
II	Ranitomeya fantastica	live		CA																								21								8	103	55	83		6	17	10	12		22	4
II	Ranitomeya fantastica	live		CH																																						30		5				14	24
II	Ranitomeya fantastica	live		CN																																										16	138
II	Ranitomeya fantastica	live		DE																				20																	75	170
II	Ranitomeya fantastica	live		FR																																							31	43	133	18	40	26
II	Ranitomeya fantastica	live		HK																																					25						19
II	Ranitomeya fantastica	live		JP																					3		8				9	5	18	6	14	45	24	22	17	29	105	78	55	126	101	147	47	44
II	Ranitomeya fantastica	live		KR																																					12				9	18	3		6
II	Ranitomeya fantastica	live		LB																															26
II	Ranitomeya fantastica	live		MX																																62	10
II	Ranitomeya fantastica	live		NL																		36	37	20	2												110	285	123	240	150	155	395	80	93	159	50	20	20
II	Ranitomeya fantastica	live		PH																																					2	25						4
II	Ranitomeya fantastica	live		SE																			8	1																		8	4		13		9		4
II	Ranitomeya fantastica	live		TH																														30	30
II	Ranitomeya fantastica	live		TW																																	4	8	5	26	25	51	10	4	14		29		9
II	Ranitomeya fantastica	live		US																					25		10	13		30						19	75		104	162	124	163	247	129	146	136	55	101
II	Ranitomeya fantastica	live		ZA																																		5
II	Ranitomeya fantastica	specimens		CA																																		30
II	Ranitomeya fantastica	specimens		US																													2									6
II	Ranitomeya flavovittata	bodies		US																														1
II	Ranitomeya flavovittata	live		CA																																	11	19					3	6		8
II	Ranitomeya flavovittata	live		CN																																											4
II	Ranitomeya flavovittata	live		FR																																							5		8	2
II	Ranitomeya flavovittata	live		JP																																			3	3	7			10	8	5		6	10
II	Ranitomeya flavovittata	live		KR																																					2
II	Ranitomeya flavovittata	live		NL																																		45	30	30	60		20	10		20
II	Ranitomeya flavovittata	live		TW																																						11
II	Ranitomeya flavovittata	live		US																																			22	28	12	10	8	9	4	4	9
II	Ranitomeya flavovittata	specimens		US																														2
II	Ranitomeya imitator	bodies		DE																																							12
II	Ranitomeya imitator	bodies		US																													1
II	Ranitomeya imitator	eggs		DE																																							36
II	Ranitomeya imitator	live		AN																																		6
II	Ranitomeya imitator	live		CA																							8	38		4							75	29	52	6			18	2		28	49		10
II	Ranitomeya imitator	live		CH																																18	6								1	3			10
II	Ranitomeya imitator	live		CN																																											85
II	Ranitomeya imitator	live		DE																								125														22
II	Ranitomeya imitator	live		FR																																							7	22	23	24	8	9
II	Ranitomeya imitator	live		GB																																					4
II	Ranitomeya imitator	live		HK																																					6						28
II	Ranitomeya imitator	live		JP																							16	41	99	20	10	14	24	30	50	25	50	93	37	33	51	33	82	72	78	140	133	79	6
II	Ranitomeya imitator	live		KR																																				30	21	10			3	38	21		8
II	Ranitomeya imitator	live		MX																																70	6
II	Ranitomeya imitator	live		MY																																						5
II	Ranitomeya imitator	live		NL																					7												70	242	195	353		40	140	78	32	126	20	10	40
II	Ranitomeya imitator	live		PH																																					2	25						19
II	Ranitomeya imitator	live		SE																																						23	8				4		10
II	Ranitomeya imitator	live		TH																															50
II	Ranitomeya imitator	live		TW																																	10	10	17	40	32	10	10	8	4	29	30	11	3
II	Ranitomeya imitator	live		US																							58	116	539	63		24	5	20	59	34	196		219	255	127	149	106	34	84	66	80	62
II	Ranitomeya imitator	live		XX																																										2
II	Ranitomeya imitator	live		ZA																																			10	10
II	Ranitomeya imitator	skins		DE																																							14
II	Ranitomeya imitator	specimens		CA																																		148
II	Ranitomeya imitator	specimens		CN																																								1
II	Ranitomeya imitator	specimens		DE																																							7	69
II	Ranitomeya imitator	specimens		US																													2				35	35				20		69			53
II	Ranitomeya reticulata	bodies		DE																																								2
II	Ranitomeya reticulata	bodies		US																														2
II	Ranitomeya reticulata	live		BE																								100											2
II	Ranitomeya reticulata	live		CA																							5						3		130		46	33	27			8		20		33	46	60
II	Ranitomeya reticulata	live		CH																																									2				8
II	Ranitomeya reticulata	live		CN																																											138
II	Ranitomeya reticulata	live		DE																				10				125				11					5
II	Ranitomeya reticulata	live		FR																																								6	48	5	28
II	Ranitomeya reticulata	live		GB																					8											6
II	Ranitomeya reticulata	live		GT																															1	1
II	Ranitomeya reticulata	live		HK																																					12						8
II	Ranitomeya reticulata	live		JP																					10			8	135	110			42	39	20		12	8	23	19	81	29	16	55	48	62	51	48	3
II	Ranitomeya reticulata	live		KR																																				2	8				9	18	4		4
II	Ranitomeya reticulata	live		MX																																40
II	Ranitomeya reticulata	live		NL																																60	100	16			50		51	45	125	10	50	15	20
II	Ranitomeya reticulata	live		PH																																					2	25				5
II	Ranitomeya reticulata	live		TH																														100	100
II	Ranitomeya reticulata	live		TW																																		38		30	27	20	10	10	8	5	16		2
II	Ranitomeya reticulata	live		US																					10	10		198	642	177				22	10	34	42	10	97	171	71	89	65	48	24	32	31	43
II	Ranitomeya reticulata	live		XX																																										3
II	Ranitomeya reticulata	specimens		US																														4
II	Ranitomeya sirensis	bodies		CH																									1
II	Ranitomeya sirensis	bodies		US																							3	10	9				1	2
II	Ranitomeya sirensis	live		CA																																	26		10						17		42		8
II	Ranitomeya sirensis	live		CN																																											6
II	Ranitomeya sirensis	live		DE																																					50
II	Ranitomeya sirensis	live		FR																																							4	17	10
II	Ranitomeya sirensis	live		HK																																							2
II	Ranitomeya sirensis	live		JP																											20	12	8	30	26	54	5	23	21	40	21	33	47	21	40	153	80		5
II	Ranitomeya sirensis	live		KR																																					4	2				20	2		29
II	Ranitomeya sirensis	live		MX																																20
II	Ranitomeya sirensis	live		NL																																			100	200	50			20					30
II	Ranitomeya sirensis	live		PH																																						25				5		12
II	Ranitomeya sirensis	live		SE																																							6						2
II	Ranitomeya sirensis	live		TH																														40	40
II	Ranitomeya sirensis	live		TW																																	14			3	6	8		24	4	18	15	40	33
II	Ranitomeya sirensis	live		US																									60	48	16	8				44	25	5	29	25	11	13	11	105		3	51	32
II	Ranitomeya sirensis	specimens		PA																																		4
II	Ranitomeya sirensis	specimens		US																													2	4												1		11
II	Ranitomeya spp.	live		KR																																										11
II	Ranitomeya summersi	live		CH																																													10
II	Ranitomeya summersi	live		FR																																									20	18		5
II	Ranitomeya summersi	live		JP																																									8	28	4	15
II	Ranitomeya summersi	live		KR																																										20
II	Ranitomeya summersi	live		NL																																									45	65	10		35
II	Ranitomeya summersi	live		US																																									12	12	10
II	Ranitomeya summersi	specimens		US																																						5
II	Ranitomeya toraro	extract	l	US																																											0.02
II	Ranitomeya toraro	specimens	ml	US																																											20
II	Ranitomeya toraro	specimens		US																																												6
II	Ranitomeya uakarii	live		CH																																									2
II	Ranitomeya uakarii	live		CN																																											75
II	Ranitomeya uakarii	live		FR																																								9	6	22	3
II	Ranitomeya uakarii	live		HK																																											4
II	Ranitomeya uakarii	live		JP																																								6	39	47	41	30	5
II	Ranitomeya uakarii	live		KR																																										14	2
II	Ranitomeya uakarii	live		NL																																								30	10	106	21	10	20
II	Ranitomeya uakarii	live		PH																																												10
II	Ranitomeya uakarii	live		SE																																											4
II	Ranitomeya uakarii	live		SG																																											8
II	Ranitomeya uakarii	live		TW																																										4	4
II	Ranitomeya uakarii	live		US																																								12	6	55	11
II	Ranitomeya uakarii	live		XX																																										5
II	Ranitomeya uakarii	specimens		US																																												4
II	Ranitomeya vanzolinii	bodies		US																						21										8
II	Ranitomeya vanzolinii	live		CA																																		11		4	19			4
II	Ranitomeya vanzolinii	live		CH																																												5
II	Ranitomeya vanzolinii	live		CN																																											7
II	Ranitomeya vanzolinii	live		DE																																							3
II	Ranitomeya vanzolinii	live		FR																																									13	5
II	Ranitomeya vanzolinii	live		GB																																											6
II	Ranitomeya vanzolinii	live		JE																																									8	8
II	Ranitomeya vanzolinii	live		JP																																				18	36	33	49	18	27	42		7	5
II	Ranitomeya vanzolinii	live		KR																																				2					4	34	2
II	Ranitomeya vanzolinii	live		NL																																									15	16
II	Ranitomeya vanzolinii	live		PH																																						25						10
II	Ranitomeya vanzolinii	live		TH																																										10
II	Ranitomeya vanzolinii	live		TW																																				10			8	13		6	12		17
II	Ranitomeya vanzolinii	live		US																						8										33	11	5	98	3	5		23	12	18	17	4	8
II	Ranitomeya vanzolinii	live		XX																																										3
II	Ranitomeya vanzolinii	specimens		US																						21																				1		9
II	Ranitomeya variabilis	bodies		DE																																							12
II	Ranitomeya variabilis	eggs		DE																																							22
II	Ranitomeya variabilis	live		CH																																								5	4
II	Ranitomeya variabilis	live		CN																																											118
II	Ranitomeya variabilis	live		DE																																						20
II	Ranitomeya variabilis	live		FR																																							3	97	64	41	34
II	Ranitomeya variabilis	live		JP																																						8	65	64	75	194	61	71	29
II	Ranitomeya variabilis	live		KR																																					5	5			7	18	4
II	Ranitomeya variabilis	live		NL																																							110	105	30	20	40
II	Ranitomeya variabilis	live		PE																																											4
II	Ranitomeya variabilis	live		PH																																						25						10
II	Ranitomeya variabilis	live		SE																																							10						3
II	Ranitomeya variabilis	live		TW																																										8	29	19	7
II	Ranitomeya variabilis	live		US																																						18	31	27	29	19	46	60
II	Ranitomeya variabilis	skins		DE																																							12
II	Ranitomeya variabilis	specimens		DE																																							7	53
II	Ranitomeya variabilis	specimens		US																																								53			13	4
II	Ranitomeya ventrimaculata	bodies		US																				9		5	1		10				2	6		3
II	Ranitomeya ventrimaculata	live		AN																																		20
II	Ranitomeya ventrimaculata	live		BE																																					225
II	Ranitomeya ventrimaculata	live		CA																							19	65	25						278	37	59	75	81	3	14	52	17	9		10	9
II	Ranitomeya ventrimaculata	live		CH																																	16			20			6		4
II	Ranitomeya ventrimaculata	live		DE																																	5	10	10		450	214
II	Ranitomeya ventrimaculata	live		EC																																						200
II	Ranitomeya ventrimaculata	live		ES																																							390
II	Ranitomeya ventrimaculata	live		FR																																							20	74
II	Ranitomeya ventrimaculata	live		GH																															10
II	Ranitomeya ventrimaculata	live		HK																																					11
II	Ranitomeya ventrimaculata	live		ID																																		12
II	Ranitomeya ventrimaculata	live		IL																												10
II	Ranitomeya ventrimaculata	live		JP																					5		46	146	124	18	28	88	46	128	24	146	56	116	77	128	174	136	152	81	22	22	23		22
II	Ranitomeya ventrimaculata	live		KR																																				32	19	2	22			10	5
II	Ranitomeya ventrimaculata	live		MX																														90	20	91	16
II	Ranitomeya ventrimaculata	live		MY																															10							6
II	Ranitomeya ventrimaculata	live		NL																																40	385	292	175	891	430	210	370	50	40
II	Ranitomeya ventrimaculata	live		PH																																					16	25			20			10
II	Ranitomeya ventrimaculata	live		RU																																						20
II	Ranitomeya ventrimaculata	live		SE																																						31	16
II	Ranitomeya ventrimaculata	live		SG																										4
II	Ranitomeya ventrimaculata	live		SU																																							60
II	Ranitomeya ventrimaculata	live		TG																													6
II	Ranitomeya ventrimaculata	live		TH																														20	40
II	Ranitomeya ventrimaculata	live		TW																													24				17	13	15	35	34	36		20	10	16	34
II	Ranitomeya ventrimaculata	live		US																				5	20		55	120	90	158		24	25	47	86	155	349	20	88	143	179	162	113	25				7
II	Ranitomeya ventrimaculata	live		ZA																																			10	10
II	Ranitomeya ventrimaculata	specimens		CA																																		20
II	Ranitomeya ventrimaculata	specimens		NZ																																	17
II	Ranitomeya ventrimaculata	specimens		US																							120		5				4	7			9	9		10		10			8		2	1
II	Ranitomeya yavaricola	live		CA																																											26	17
II	Ranitomeya yavaricola	specimens		US																																												9
II	Rheobatrachus spp.	derivatives		NZ																												30
II	Scaphiophryne gottlebei	bodies		IT																														30
II	Scaphiophryne gottlebei	live		CA																													100	100	98	127	75	66	25	124			9	10
II	Scaphiophryne gottlebei	live		CH																																8			20	56	44		10
II	Scaphiophryne gottlebei	live		CL																																			50
II	Scaphiophryne gottlebei	live		CN																																	30						29
II	Scaphiophryne gottlebei	live		CS																														20
II	Scaphiophryne gottlebei	live		CZ																														10
II	Scaphiophryne gottlebei	live		DE																														50	20
II	Scaphiophryne gottlebei	live		FR																																												4
II	Scaphiophryne gottlebei	live		GB																														25				10					58
II	Scaphiophryne gottlebei	live		HK																																						74	60	29
II	Scaphiophryne gottlebei	live		JP																													15	166	70	241	126	143	80	50	121	69	52	29
II	Scaphiophryne gottlebei	live		KR																															7
II	Scaphiophryne gottlebei	live		NL																																		40	20
II	Scaphiophryne gottlebei	live		PH																																5
II	Scaphiophryne gottlebei	live		RS																																			23
II	Scaphiophryne gottlebei	live		RU																																				92		46
II	Scaphiophryne gottlebei	live		TH																														140					125	20
II	Scaphiophryne gottlebei	live		TW																														12		100	57	70				22
II	Scaphiophryne gottlebei	live		US																													880	562	250	298	485	388	332	422	104	96	55	9
II	Scaphiophryne gottlebei	live		XX																																	10
II	Scaphiophryne gottlebei	specimens		DE																																								4
II	Scaphiophryne marmorata	live		CZ																																												14
II	Scaphiophryne marmorata	live		ID																																												20
II	Scaphiophryne marmorata	live		IE																																											22
II	Scaphiophryne marmorata	live		JP																																											11	48
II	Scaphiophryne marmorata	live		NL																																											22	22	10
II	Scaphiophryne marmorata	live		TW																																												28
II	Scaphiophryne marmorata	live		US																																											72	96
II	Scaphiophryne marmorata	specimens	g	US																																												20
II	Scaphiophryne marmorata	specimens		US																																												20
II	Scaphiophryne spinosa	live		CZ																																												48
II	Scaphiophryne spinosa	live		HK																																											43	20
II	Scaphiophryne spinosa	live		HU																																													28
II	Scaphiophryne spinosa	live		ID																																												20
II	Scaphiophryne spinosa	live		JP																																											27	85
II	Scaphiophryne spinosa	live		KP																																												8
II	Scaphiophryne spinosa	live		NL																																											22	63
II	Scaphiophryne spinosa	live		US																																											203	194
II	Scaphiophryne spinosa	live		XX																																											30
III	Calyptocephalella gayi	live		JP																																						14				100
III	Calyptocephalella gayi	live		US																																						300	150
III	Cryptobranchus alleganiensis	bodies		CA																																								1
III	Cryptobranchus alleganiensis	live		CH																																												6
III	Cryptobranchus alleganiensis	skeletons		CA																																											1
III	Cryptobranchus alleganiensis	skeletons		US																																											1
III	Cryptobranchus alleganiensis	specimens		US																																									1
III	Hynobius amjiensis	bodies		CA																																								1
III	Hynobius amjiensis	specimens		US																																									1
III	Salamandra algira	live		JP																																												6	33
N	Agalychnis callidryas	live		CA																																		1400
N	Agalychnis callidryas	live		DE																																		200
N	Agalychnis callidryas	live		FR																																		800
N	Agalychnis callidryas	live		NL																																		840
N	Agalychnis callidryas	live		US																																		25662
N	Ambystoma lermaense	live		DE																		100
N	Conraua goliath	live		DE																									5
N	Conraua goliath	live		ES																								6	50
N	Conraua goliath	live		GB																											4
N	Conraua goliath	live		JP																											15
N	Conraua goliath	live		NL																									4
N	Conraua goliath	specimens		US																														199
N	Cynops ensicauda	live		DE																																				100	75		38			20
N	Laotriton laoensis	live		DE																																							41
N	Limnonectes macrodon	live		DE																																										2
N	Lithobates catesbeianus	bodies		DE																								12	48		48	52	65					40		20		40
N	Lithobates catesbeianus	live		CZ																																		10
N	Lithobates catesbeianus	live		DK																									50	55	95		48
N	Lithobates catesbeianus	live		ES																								4					6
N	Lithobates catesbeianus	live		GB																							2											350
N	Lithobates catesbeianus	live		MO																													65000
N	Lithobates catesbeianus	skins	kg	GB																														2
N	Lithobates catesbeianus	skins		AT																														3	70
N	Lithobates catesbeianus	skins		CN																																				1
N	Lithobates catesbeianus	skins		DE																																50
N	Lithobates catesbeianus	skins		GB																														4
N	Lithobates catesbeianus	skins		IT																															54				2
N	Lithobates catesbeianus	skulls		DE																											2
N	Mantella bernhardi	live		NL																									30
N	Mantella betsileo	live		BE																							1000	200
N	Mantella betsileo	live		DE																								25	50	50
N	Mantella betsileo	live		ES																								35
N	Mantella betsileo	live		FR																								25		100
N	Mantella betsileo	live		GB																									10	40
N	Mantella betsileo	live		NL																								150	125
N	Mantella cowanii	live		DE																								2
N	Mantella cowanii	live		FR																								50	50
N	Mantella cowanii	live		NL																									100
N	Mantella crocea	live		BE																								200
N	Mantella crocea	live		DE																								45	50
N	Mantella crocea	live		ES																								25	25
N	Mantella crocea	live		NL																								125	175
N	Mantella expectata	live		BE																							100	300
N	Mantella expectata	live		DE																								124	30
N	Mantella expectata	live		ES																								25
N	Mantella expectata	live		GB																								30
N	Mantella expectata	live		MG																									40
N	Mantella expectata	live		NL																								175	75
N	Mantella laevigata	live		BE																							100	200
N	Mantella laevigata	live		CA																									12
N	Mantella laevigata	live		DE																								85	170
N	Mantella laevigata	live		ES																								25
N	Mantella laevigata	live		GB																								10
N	Mantella laevigata	live		NL																								125	245
N	Mantella madagascariensis	live		BE																							125	400
N	Mantella madagascariensis	live		DE																								742	330
N	Mantella madagascariensis	live		DK																									6
N	Mantella madagascariensis	live		ES																								105	75
N	Mantella madagascariensis	live		FR																								230	647
N	Mantella madagascariensis	live		GB																								32
N	Mantella madagascariensis	live		MG																									1
N	Mantella madagascariensis	live		NL																								715	520
N	Mantella pulchra	live		BE																								200
N	Mantella pulchra	live		DE																								109	160
N	Mantella pulchra	live		ES																								25
N	Mantella pulchra	live		FR																								50	450
N	Mantella pulchra	live		GB																								19
N	Mantella pulchra	live		NL																								400	295
N	Mantella spp.	live		BE																							100	200
N	Mantella spp.	live		DE																							230		150
N	Mantella spp.	live		DK																								198
N	Mantella spp.	live		FR																								50	50
N	Mantella spp.	live		NL																								390
N	Mantella spp.	specimens		IT																									15	15
N	Mantella viridis	live		BE																							125	300
N	Mantella viridis	live		CA																									12
N	Mantella viridis	live		CN																									2
N	Mantella viridis	live		DE																								195	104
N	Mantella viridis	live		ES																								20
N	Mantella viridis	live		GB																								10
N	Mantella viridis	live		NL																								175	285
N	Paramesotriton chinensis	live		CZ																																			62			128
N	Paramesotriton chinensis	live		DE																																			700		152		53
N	Paramesotriton hongkongensis	live		GB																																										12
N	Paramesotriton labiatus	live		CZ																																			102			159
N	Paramesotriton labiatus	live		DE																																					150
N	Paramesotriton labiatus	live		ES																																				225
N	Paramesotriton labiatus	live		IT																																						28
N	Phyllomedusa sauvagii	live		DE																																			5	30	255	10	18
N	Phyllomedusa sauvagii	live		GB																																				24		25		2
N	Phyllomedusa sauvagii	live		NL																																										20
N	Tylototriton asperrimus	live		CZ																																						70
N	Tylototriton asperrimus	live		DE																																					125	50	122
[truncated: 6 more rows]
[truncated: 1 more columns]
