# Supplementary material for: Gaps in global wildlife trade monitoring leave amphibians vulnerable
Source: eLife. 2021 Aug 12;10:e70086. doi: 10.7554/eLife.70086 (PMC8425949; doi:10.7554/eLife.70086)
Supplement: Source data 10. [file elife-70086-data10.csv]

order_	family	subfamily	genus	species	genus_spec	subgenus	common_nam	gaa_name	synonymies	itis_names	iucn	isocc	taxon_note	amphiName	onlineSnap	onlineTemp	onlineEither	lemisTrade	citesTrade	anyTrade	citesList	citesApp	mohantyTrade	iucnTrade	anyTrade_extra	speciesAuthority	descYear
Anura	Ranidae		Abavorana	luctuosa	Abavorana luctuosa			Abavorana luctuosa	Rana luctuosa	Rana luctuosa	Least Concern (LC)	MY,ID		Abavorana luctuosa	TRUE	FALSE	TRUE	TRUE	FALSE	TRUE	FALSE	FALSE	TRUE	FALSE	TRUE	Abavorana luctuosa (Peters, 1871)	1871
Anura	Hylidae	Hylinae	Acris	crepitans	Acris crepitans		Northern Cricket Frog	Acris crepitans			Least Concern (LC)	US		Acris crepitans	FALSE	FALSE	FALSE	TRUE	FALSE	TRUE	FALSE	FALSE	FALSE	FALSE	TRUE	Acris crepitans Baird, 1854	1854
Anura	Hylidae	Hylinae	Acris	gryllus	Acris gryllus		Southern Cricket Frog, Florida Cricket Frog (<i>A. g. dorsalis</i>), Southern Cricket Frog (<i>A. g. gryllus</i>)	Acris gryllus			Least Concern (LC)	US		Acris gryllus	FALSE	FALSE	FALSE	FALSE	FALSE	FALSE	FALSE	FALSE	TRUE	FALSE	TRUE	Acris gryllus (LeConte, 1825)	1825
Anura	Dendrobatidae	Dendrobatinae	Adelphobates	castaneoticus	Adelphobates castaneoticus		Brazil-nut Poison Frog	Adelphobates castaneoticus	Dendrobates castaneoticus	Dendrobates castaneoticus	Least Concern (LC)	BR		Adelphobates castaneoticus	TRUE	TRUE	TRUE	FALSE	TRUE	TRUE	TRUE	II	FALSE	TRUE	TRUE	Adelphobates castaneoticus (Caldwell and Myers, 1990)	1990
Anura	Dendrobatidae	Dendrobatinae	Adelphobates	galactonotus	Adelphobates galactonotus		Splash-Backed Poison Frog	Adelphobates galactonotus	Dendrobates galactonotus	Dendrobates galactonotus	Least Concern (LC)	BR		Adelphobates galactonotus	TRUE	TRUE	TRUE	TRUE	TRUE	TRUE	TRUE	II	TRUE	TRUE	TRUE	Adelphobates galactonotus (Steindachner, 1864)	1864
Anura	Dendrobatidae	Dendrobatinae	Adelphobates	quinquevittatus	Adelphobates quinquevittatus			Adelphobates quinquevittatus		Adelphobates quinquevittatus	Least Concern (LC)	BO,BR,CO		Adelphobates quinquevittatus	FALSE	TRUE	TRUE	FALSE	TRUE	TRUE	TRUE	II	FALSE	FALSE	TRUE	Adelphobates quinquevittatus (Steindachner, 1864)	1864
Anura	Leptodactylidae	Leptodactylinae	Adenomera	andreae	Adenomera andreae			Adenomera andreae	Leptodactylus andreae	Leptodactylus andreae	Least Concern (LC)	GF,SR,GY,VE,BO,PE,EC,CO,BR		Adenomera andreae	FALSE	FALSE	FALSE	TRUE	FALSE	TRUE	FALSE	FALSE	FALSE	FALSE	TRUE	Adenomera andreae (Müller, 1923)	1923
Anura	Leptodactylidae	Leptodactylinae	Adenomera	hylaedactyla	Adenomera hylaedactyla		Dark-spotted Thin-toed Frog	Adenomera hylaedactyla	Leptodactylus hololius, Leptodactylus melini, Leptodactylus poeppigi, Leptodactylus hylaedactylus	Leptodactylus hololius, Leptodactylus melini, Leptodactylus poeppigi, Leptodactylus hylaedactylus	Least Concern (LC)	SR,GF,GY,EC,BO,PE,PY,BR,VE,CO		Adenomera hylaedactyla	FALSE	FALSE	FALSE	TRUE	FALSE	TRUE	FALSE	FALSE	FALSE	FALSE	TRUE	Adenomera hylaedactyla (Cope, 1868)	1868
Anura	Leptodactylidae	Leptodactylinae	Adenomera	martinezi	Adenomera martinezi			Adenomera martinezi	Leptodactylus martinezi	Leptodactylus martinezi	Least Concern (LC)	BR		Adenomera martinezi	FALSE	FALSE	FALSE	TRUE	FALSE	TRUE	FALSE	FALSE	FALSE	FALSE	TRUE	Adenomera martinezi (Bokermann, 1956)	1956
Anura	Hyperoliidae		Afrixalus	dorsalis	Afrixalus dorsalis		Striped Spiny Reed Frog	Afrixalus dorsalis			Least Concern (LC)	AO,CM,CG,CD,CI,GQ,GA,GH,GN,LR,NG,SL,TG		Afrixalus dorsalis	TRUE	TRUE	TRUE	TRUE	FALSE	TRUE	FALSE	FALSE	TRUE	FALSE	TRUE	Afrixalus dorsalis (Peters, 1875)	1875
Anura	Hyperoliidae		Afrixalus	equatorialis	Afrixalus equatorialis			Afrixalus equatorialis			Least Concern (LC)	CD		Afrixalus equatorialis	FALSE	FALSE	FALSE	TRUE	FALSE	TRUE	FALSE	FALSE	FALSE	FALSE	TRUE	Afrixalus equatorialis (Laurent, 1941)	1941
Anura	Hyperoliidae		Afrixalus	fornasini	Afrixalus fornasini		Fornasini's Spiny Reed Frog	Afrixalus fornasini			Least Concern (LC)	KE,MW,MZ,ZA,TZ,ZW		Afrixalus fornasini	FALSE	TRUE	TRUE	TRUE	FALSE	TRUE	FALSE	FALSE	TRUE	TRUE	TRUE	Afrixalus fornasini (Bianconi, 1849)	1849
Anura	Hyperoliidae		Afrixalus	fulvovittatus	Afrixalus fulvovittatus			Afrixalus fulvovittatus			Least Concern (LC)	BI,CM,CD,CI,ET,GA,GM,GH,GN,GW,LR,NG,RW,SN,SL,TZ,TG,UG		Afrixalus fulvovittatus	TRUE	TRUE	TRUE	TRUE	FALSE	TRUE	FALSE	FALSE	FALSE	FALSE	TRUE	Afrixalus fulvovittatus (Cope, 1861)	1861
Anura	Hyperoliidae		Afrixalus	laevis	Afrixalus laevis			Afrixalus laevis			Least Concern (LC)	BI,CM,CD,GA,LR,RW,UG		Afrixalus laevis	FALSE	FALSE	FALSE	TRUE	FALSE	TRUE	FALSE	FALSE	FALSE	FALSE	TRUE	Afrixalus laevis (Ahl, 1930)	1930
Anura	Hyperoliidae		Afrixalus	orophilus	Afrixalus orophilus			Afrixalus orophilus			Least Concern (LC)	BI,CD,RW,UG		Afrixalus orophilus	FALSE	FALSE	FALSE	FALSE	FALSE	FALSE	FALSE	FALSE	FALSE	TRUE	TRUE	Afrixalus orophilus (Laurent, 1947)	1947
Anura	Hyperoliidae		Afrixalus	osorioi	Afrixalus osorioi		Osorio's Spiny Reed Frog	Afrixalus osorioi			Least Concern (LC)	AO,CD,KE,UG		Afrixalus osorioi	FALSE	FALSE	FALSE	TRUE	FALSE	TRUE	FALSE	FALSE	FALSE	FALSE	TRUE	Afrixalus osorioi (Ferreira, 1906)	1906
Anura	Hyperoliidae		Afrixalus	paradorsalis	Afrixalus paradorsalis			Afrixalus paradorsalis			Least Concern (LC)	GA,CM,NG		Afrixalus paradorsalis	TRUE	TRUE	TRUE	TRUE	FALSE	TRUE	FALSE	FALSE	TRUE	FALSE	TRUE	Afrixalus paradorsalis Perret, 1960	1960
Anura	Hyperoliidae		Afrixalus	septentrionalis	Afrixalus septentrionalis			Afrixalus septentrionalis	Afrixalus brachycnemis	Afrixalus brachycnemis	Least Concern (LC)	KE,TZ		Afrixalus septentrionalis	FALSE	TRUE	TRUE	FALSE	FALSE	TRUE	FALSE	FALSE	FALSE	FALSE	TRUE	Afrixalus septentrionalis Schiøtz, 1974	1974
Anura	Hyperoliidae		Afrixalus	stuhlmanni	Afrixalus stuhlmanni			Afrixalus stuhlmanni	Afrixalus brachycnemis	Afrixalus brachycnemis	Least Concern (LC)	KE,MW,MZ,TZ,ZM		Afrixalus stuhlmanni	FALSE	TRUE	TRUE	FALSE	FALSE	TRUE	FALSE	FALSE	TRUE	FALSE	TRUE	Afrixalus stuhlmanni (Pfeffer, 1893)	1893
Anura	Hyperoliidae		Afrixalus	sylvaticus	Afrixalus sylvaticus			Afrixalus sylvaticus	Afrixalus brachycnemis	Afrixalus brachycnemis	Vulnerable (VU)	KE,TZ		Afrixalus sylvaticus	FALSE	TRUE	TRUE	FALSE	FALSE	TRUE	FALSE	FALSE	FALSE	FALSE	TRUE	Afrixalus sylvaticus Schiøtz, 1974	1974
Anura	Hylidae	Phyllomedusinae	Agalychnis	annae	Agalychnis annae		Blue-sided Tree Frog, Rana de Cafetal	Agalychnis annae			Endangered (EN)	CR		Agalychnis annae	TRUE	TRUE	TRUE	TRUE	TRUE	TRUE	TRUE	II	TRUE	TRUE	TRUE	Agalychnis annae (Duellman, 1963)	1963
Anura	Hylidae	Phyllomedusinae	Agalychnis	callidryas	Agalychnis callidryas		Red-eyed Multicolored Treefrog, Red-Eyed Tree Frog, Red-Eyed Leaf Frog, Gaudy Leaf Frog, Rana ArborÃÂ­cola, Rana Calzonudo	Agalychnis callidryas			Least Concern (LC)	BZ,CO,CR,GT,HN,MX,NI,PA		Agalychnis callidryas	TRUE	TRUE	TRUE	TRUE	TRUE	TRUE	TRUE	II	TRUE	TRUE	TRUE	Agalychnis callidryas (Cope, 1862)	1862
Anura	Hylidae	Phyllomedusinae	Agalychnis	dacnicolor	Agalychnis dacnicolor		Mexican Giant Tree Frog	Agalychnis dacnicolor			Least Concern (LC)	MX	Faivovich, J., C. F. B. Haddad, D. BaÃÂªta, K.-H. Jungfer, G. F. R. ÃÂlvares, R. A. BrandÃÂ£o, C. A. Sheil, L. S. Barrientos, C. L. Barrio-AmorÃÂ³s, C. A. G. Cruz, and W. C. Wheeler. 2010. The phylogenetic relationships of the ch	Agalychnis dacnicolor	TRUE	TRUE	TRUE	FALSE	FALSE	TRUE	FALSE	FALSE	TRUE	FALSE	TRUE	Agalychnis dacnicolor (Cope, 1864)	1864
Anura	Hylidae	Phyllomedusinae	Agalychnis	lemur	Agalychnis lemur		Lemur Leaf Frog	Agalychnis lemur	Phyllomedusa lemur	Phyllomedusa lemur	Critically Endangered (CR)	CO,CR,PA		Agalychnis lemur	TRUE	TRUE	TRUE	TRUE	FALSE	TRUE	FALSE	FALSE	TRUE	FALSE	TRUE	Agalychnis lemur (Boulenger, 1882)	1882
Anura	Hylidae	Phyllomedusinae	Agalychnis	medinae	Agalychnis medinae			Agalychnis medinae	Hylomantis medinae, Phyllomedusa medinae, Phyllomedusa medinai, Hylomantis medinai	Phyllomedusa medinae, Phyllomedusa medinai, Hylomantis medinai	Data Deficient (DD)	VE		Agalychnis medinae	FALSE	FALSE	FALSE	FALSE	FALSE	FALSE	FALSE	FALSE	FALSE	TRUE	TRUE	Agalychnis medinae (Funkhouser, 1962)	1962
Anura	Hylidae	Phyllomedusinae	Agalychnis	moreletii	Agalychnis moreletii		Black-eyed Tree Frog, Morelet's Treefrog	Agalychnis moreletii			Least Concern (LC)	BZ,SV,GT,HN,MX		Agalychnis moreletii	TRUE	TRUE	TRUE	TRUE	TRUE	TRUE	TRUE	II	FALSE	TRUE	TRUE	Agalychnis moreletii (Duméril, 1853)	1853
Anura	Hylidae	Phyllomedusinae	Agalychnis	saltator	Agalychnis saltator		Parachuting Red-eyed Leaf Frog, Misfit Leaf Frog	Agalychnis saltator			Least Concern (LC)	CR,HN,NI		Agalychnis saltator	TRUE	TRUE	TRUE	FALSE	FALSE	TRUE	TRUE	II	FALSE	FALSE	TRUE	Agalychnis saltator Taylor, 1955	1955
Anura	Hylidae	Phyllomedusinae	Agalychnis	spurrelli	Agalychnis spurrelli		Gliding Leaf Frog, Gliding Tree Frog, Spurrell's Leaf Frog	Agalychnis spurrelli	Agalychnis litodryas	Agalychnis litodryas	Least Concern (LC)	CO,CR,EC,PA		Agalychnis spurrelli	TRUE	TRUE	TRUE	TRUE	TRUE	TRUE	TRUE	II	TRUE	FALSE	TRUE	Agalychnis spurrelli Boulenger, 1913	1913
Anura	Dendrobatidae	Aromobatinae	Allobates	femoralis	Allobates femoralis			Allobates femoralis			Least Concern (LC)	SR,PE,GY,GF,EC,CO,BR		Allobates femoralis	FALSE	FALSE	FALSE	TRUE	TRUE	TRUE	TRUE	II	TRUE	FALSE	TRUE	Allobates femoralis (Boulenger, 1884)	1884
Anura	Dendrobatidae	Aromobatinae	Allobates	talamancae	Allobates talamancae		Striped Rocket Frog	Allobates talamancae	Colostethus talamancae	Colostethus talamancae	Least Concern (LC)	CO,CR,EC,PA		Allobates talamancae	TRUE	FALSE	TRUE	FALSE	FALSE	TRUE	FALSE	FALSE	FALSE	TRUE	TRUE	Allobates talamancae (Cope, 1875)	1875
Anura	Dendrobatidae	Aromobatinae	Allobates	trilineatus	Allobates trilineatus			Allobates trilineatus	Colostethus trilineatus	Colostethus trilineatus	Least Concern (LC)	BR,CO,EC,PE		Allobates trilineatus	FALSE	FALSE	FALSE	TRUE	FALSE	TRUE	FALSE	FALSE	FALSE	FALSE	TRUE	Allobates trilineatus (Boulenger, 1884)	1884
Anura	Dendrobatidae	Aromobatinae	Allobates	zaparo	Allobates zaparo		Sanguine Poison-arrow Frog, Sanguine Poison Frog, ZaparoÃ¢â¬â¢s Poison Frog, Rana Venenosa (Spanish)	Allobates zaparo			Least Concern (LC)	PE,EC		Allobates zaparo	FALSE	FALSE	FALSE	FALSE	TRUE	TRUE	TRUE	II	FALSE	FALSE	TRUE	Allobates zaparo (Silverstone, 1976)	1976
Anura	Allophrynidae		Allophryne	ruthveni	Allophryne ruthveni		Tukeit-Hill Frog	Allophryne ruthveni	Sphaenorhynchus seabrai, Sphoenohyla seabrai	Sphaenorhynchus seabrai, Sphoenohyla seabrai	Least Concern (LC)	VE,SR,GY,GF,BR		Allophryne ruthveni	TRUE	FALSE	TRUE	TRUE	FALSE	TRUE	FALSE	FALSE	FALSE	FALSE	TRUE	Allophryne ruthveni Gaige, 1926	1926
Anura	Bufonidae		Altiphrynoides	malcolmi	Altiphrynoides malcolmi		MalcolmÃ¢â¬â¢s Ethiopian toad	Altiphrynoides malcolmi			Endangered (EN)	ET		Altiphrynoides malcolmi	FALSE	FALSE	FALSE	FALSE	TRUE	TRUE	TRUE	I	TRUE	FALSE	TRUE	Altiphrynoides malcolmi (Grandison, 1978)	1978
Anura	Alytidae	Alytinae	Alytes	muletensis	Alytes muletensis	Baleaphryne	Mallorcan Midwife Toad, Ferreret, Balearenkroete, Baleaari kÃÂ¶idikkonn, Sapilo Balear, Alyte de Majorque, Alyte Balearico, Rospo Ostetrico Balearico, balearen vroedmeesterpad	Alytes muletensis			Vulnerable (VU)	ES		Alytes muletensis	TRUE	FALSE	TRUE	TRUE	FALSE	TRUE	FALSE	FALSE	TRUE	FALSE	TRUE	Alytes muletensis (Sanchíz and Adrover, 1979)	1979
Anura	Alytidae	Alytinae	Alytes	obstetricans	Alytes obstetricans	Alytes	Midwife Toad, TÃÂ²til, Gripau llevador, FÃÂ¸dselshjÃÂ¦lperfrÃÂ¸, geburtshelferkroete, glockenfrosch, harilik kÃÂ¶idikkonn, sapo partero comÃÂ¹n, txantxiku arrunta, alyte accoucheur, crapaud accroucheur, sapo part	Alytes obstetricans			Least Concern (LC)	BE,FR,DE,IT,LU,NL,PT,ES,CH,GB		Alytes obstetricans	TRUE	TRUE	TRUE	FALSE	FALSE	TRUE	FALSE	FALSE	TRUE	FALSE	TRUE	Alytes obstetricans (Laurenti, 1768)	1768
Caudata	Ambystomatidae		Ambystoma	andersoni	Ambystoma andersoni	Heterotriton	Achoque (local Mexican name), AndersonÃ¢â¬â¢s salamander	Ambystoma andersoni			Critically Endangered (CR)	MX		Ambystoma andersoni	TRUE	TRUE	TRUE	TRUE	FALSE	TRUE	FALSE	FALSE	TRUE	TRUE	TRUE	Ambystoma andersoni Krebs and Brandon, 1984	1984
Caudata	Ambystomatidae		Ambystoma	annulatum	Ambystoma annulatum	Linguaelapsus	Ringed Salamander	Ambystoma annulatum	Amblystoma annulatum	Amblystoma annulatum	Least Concern (LC)	US		Ambystoma annulatum	FALSE	TRUE	TRUE	FALSE	FALSE	TRUE	FALSE	FALSE	FALSE	FALSE	TRUE	Ambystoma annulatum Cope, 1886	1886
Caudata	Ambystomatidae		Ambystoma	californiense	Ambystoma californiense	Heterotriton	California Tiger Salamander	Ambystoma californiense	Ambyostoma californiense	Ambyostoma californiense	Vulnerable (VU)	US		Ambystoma californiense	FALSE	TRUE	TRUE	TRUE	FALSE	TRUE	FALSE	FALSE	TRUE	FALSE	TRUE	Ambystoma californiense Gray, 1853	1853
Caudata	Ambystomatidae		Ambystoma	dumerilii	Ambystoma dumerilii	Heterotriton	Lake PÃÂ¡tzcuaro Salamander, Achoques	Ambystoma dumerilii			Critically Endangered (CR)	MX		Ambystoma dumerilii	TRUE	FALSE	TRUE	TRUE	TRUE	TRUE	TRUE	II	FALSE	TRUE	TRUE	Ambystoma dumerilii (Dugès, 1870)	1870
Caudata	Ambystomatidae		Ambystoma	gracile	Ambystoma gracile	Ambystoma	Northwestern Salamander	Ambystoma gracile	Siredon gracilis	Siredon gracilis	Least Concern (LC)	CA,US		Ambystoma gracile	TRUE	TRUE	TRUE	FALSE	FALSE	TRUE	FALSE	FALSE	FALSE	FALSE	TRUE	Ambystoma gracile (Baird, 1859)	1859
Caudata	Ambystomatidae		Ambystoma	granulosum	Ambystoma granulosum	Heterotriton		Ambystoma granulosum			Critically Endangered (CR)	MX		Ambystoma granulosum	FALSE	FALSE	FALSE	FALSE	FALSE	FALSE	FALSE	FALSE	FALSE	TRUE	TRUE	Ambystoma granulosum Taylor, 1944	1944
Caudata	Ambystomatidae		Ambystoma	jeffersonianum	Ambystoma jeffersonianum	Xiphonura	Jefferson Salamander	Ambystoma jeffersonianum	Ambystoma tremblayi, Salamandra jeffersoniana	Ambystoma tremblayi, Salamandra jeffersoniana	Least Concern (LC)	US,CA		Ambystoma jeffersonianum	FALSE	FALSE	FALSE	TRUE	FALSE	TRUE	FALSE	FALSE	TRUE	FALSE	TRUE	Ambystoma jeffersonianum (Green, 1827)	1827
Caudata	Ambystomatidae		Ambystoma	laterale	Ambystoma laterale	Xiphonura	Blue-spotted Salamander	Ambystoma laterale	Ambystoma nothagenes, Ambystoma platineum, Ambystoma tremblayi	Ambystoma nothagenes, Ambystoma platineum, Ambystoma tremblayi	Least Concern (LC)	US,CA		Ambystoma laterale	FALSE	TRUE	TRUE	TRUE	FALSE	TRUE	FALSE	FALSE	TRUE	FALSE	TRUE	Ambystoma laterale Hallowell, 1856	1856
Caudata	Ambystomatidae		Ambystoma	leorae	Ambystoma leorae	Heterotriton		Ambystoma leorae	Rhyacosiredon leorae	Rhyacosiredon leorae	Critically Endangered (CR)	MX		Ambystoma leorae	FALSE	FALSE	FALSE	FALSE	FALSE	FALSE	FALSE	FALSE	FALSE	TRUE	TRUE	Ambystoma leorae (Taylor, 1943)	1943
Caudata	Ambystomatidae		Ambystoma	lermaense	Ambystoma lermaense	Heterotriton		Ambystoma lermaense			Endangered (EN)	MX		Ambystoma lermaense	FALSE	FALSE	FALSE	TRUE	TRUE	TRUE	FALSE	FALSE	FALSE	TRUE	TRUE	Ambystoma lermaense (Taylor, 1940)	1940
Caudata	Ambystomatidae		Ambystoma	macrodactylum	Ambystoma macrodactylum	Xiphonura	Long-toed Salamander, Eastern Long-Toed Salamander, Santa Cruz Long-Toed Salamander, Northern Long-Toed Salamander, Western Long-Toed Salamander, Southern Long-Toed Salamander	Ambystoma macrodactylum			Least Concern (LC)	US,CA		Ambystoma macrodactylum	TRUE	TRUE	TRUE	TRUE	FALSE	TRUE	FALSE	FALSE	FALSE	FALSE	TRUE	Ambystoma macrodactylum Baird, 1850	1850
Caudata	Ambystomatidae		Ambystoma	maculatum	Ambystoma maculatum	Ambystoma	Spotted Salamander	Ambystoma maculatum	Lacerta maculatum, Lacerta subviolacea, Lacerta maculata	Lacerta maculatum, Lacerta subviolacea, Lacerta maculata	Least Concern (LC)	US,CA		Ambystoma maculatum	TRUE	TRUE	TRUE	TRUE	FALSE	TRUE	FALSE	FALSE	TRUE	FALSE	TRUE	Ambystoma maculatum (Shaw, 1802)	1802
Caudata	Ambystomatidae		Ambystoma	mavortium	Ambystoma mavortium	Heterotriton	Barred Tiger Salamander, Gray Barred Tiger Salamander, Blotched Tiger Salamander, Arizona Tiger Salamander, Sonora Tiger Salamander	Ambystoma mavortium	Ambystoma mavortia	Ambystoma mavortia	Least Concern (LC)	CA,US	This taxon is often considered a subspecies of <i>A. tigrinum</i>. We treat it as a full species, including taxa recognized by others as subspecies of <i>A. tigrinum</i> (except for <i>A. tigrinum tigrinum</i>).	Ambystoma mavortium	TRUE	TRUE	TRUE	FALSE	FALSE	TRUE	FALSE	FALSE	TRUE	FALSE	TRUE	Ambystoma mavortium Baird, 1850	1850
Caudata	Ambystomatidae		Ambystoma	mexicanum	Ambystoma mexicanum	Heterotriton	Mexican Axolotl	Ambystoma mexicanum			Critically Endangered (CR)	MX		Ambystoma mexicanum	TRUE	TRUE	TRUE	TRUE	TRUE	TRUE	TRUE	II	TRUE	TRUE	TRUE	Ambystoma mexicanum (Shaw and Nodder, 1798)	1798
Caudata	Ambystomatidae		Ambystoma	opacum	Ambystoma opacum	Xiphonura	Marbled Salamander	Ambystoma opacum	Salamandra opaca	Salamandra opaca	Least Concern (LC)	US		Ambystoma opacum	TRUE	TRUE	TRUE	TRUE	FALSE	TRUE	FALSE	FALSE	TRUE	TRUE	TRUE	Ambystoma opacum (Gravenhorst, 1807)	1807
Caudata	Ambystomatidae		Ambystoma	ordinarium	Ambystoma ordinarium	Heterotriton	Michoacan Stream Salamander, Puerto Hondo Stream Salamander	Ambystoma ordinarium			Endangered (EN)	MX		Ambystoma ordinarium	FALSE	FALSE	FALSE	FALSE	FALSE	FALSE	FALSE	FALSE	TRUE	TRUE	TRUE	Ambystoma ordinarium Taylor, 1940	1940
Caudata	Ambystomatidae		Ambystoma	rivulare	Ambystoma rivulare	Heterotriton		Ambystoma rivulare	Rhyacosiredon rivularis, Ambystoma rivularis	Rhyacosiredon rivularis, Ambystoma rivularis	Data Deficient (DD)	MX		Ambystoma rivulare	TRUE	FALSE	TRUE	FALSE	FALSE	TRUE	FALSE	FALSE	FALSE	FALSE	TRUE	Ambystoma rivulare (Taylor, 1940)	1940
Caudata	Ambystomatidae		Ambystoma	talpoideum	Ambystoma talpoideum	Ambystoma	Mole Salamander	Ambystoma talpoideum	Salamandra talpoidea	Salamandra talpoidea	Least Concern (LC)	US		Ambystoma talpoideum	TRUE	TRUE	TRUE	TRUE	FALSE	TRUE	FALSE	FALSE	TRUE	FALSE	TRUE	Ambystoma talpoideum (Holbrook, 1838)	1838
Caudata	Ambystomatidae		Ambystoma	texanum	Ambystoma texanum	Linguaelapsus	Small-Mouthed Salamander, Smallmouth Salamander	Ambystoma texanum	Ambystoma nothagenes, Salamandra texana	Ambystoma nothagenes, Salamandra texana	Least Concern (LC)	US,CA		Ambystoma texanum	TRUE	FALSE	TRUE	TRUE	FALSE	TRUE	FALSE	FALSE	FALSE	FALSE	TRUE	Ambystoma texanum (Matthes, 1855)	1855
Caudata	Ambystomatidae		Ambystoma	tigrinum	Ambystoma tigrinum	Heterotriton	Eastern Tiger Salamander	Ambystoma tigrinum	Salamandra tigrina	Salamandra tigrina	Least Concern (LC)	US,MX,CA	This taxon is often combined with <i>Ambystoma mavortium</i>, which AmphibiaWeb treats as a distinct species.	Ambystoma tigrinum	TRUE	TRUE	TRUE	TRUE	FALSE	TRUE	FALSE	FALSE	TRUE	TRUE	TRUE	Ambystoma tigrinum (Green, 1825)	1825
Caudata	Ambystomatidae		Ambystoma	velasci	Ambystoma velasci	Heterotriton	Mexican Tiger Salamander	Ambystoma velasci			Least Concern (LC)	MX		Ambystoma velasci	TRUE	FALSE	TRUE	FALSE	FALSE	TRUE	FALSE	FALSE	TRUE	TRUE	TRUE	Ambystoma velasci Dugès, 1888	1888
Anura	Dendrobatidae	Colostethinae	Ameerega	altamazonica	Ameerega altamazonica		Tarapoto Poison Frog				NA	PE		Ameerega altamazonica	FALSE	FALSE	FALSE	FALSE	TRUE	TRUE	TRUE	II	TRUE	FALSE	TRUE	Ameerega altamazonica Twomey and Brown, 2008	2008
Anura	Dendrobatidae	Colostethinae	Ameerega	bassleri	Ameerega bassleri			Ameerega bassleri	Epipedobates bassleri	Epipedobates bassleri	Near Threatened (NT)	PE		Ameerega bassleri	TRUE	TRUE	TRUE	TRUE	TRUE	TRUE	TRUE	II	TRUE	FALSE	TRUE	Ameerega bassleri (Melin, 1941)	1941
Anura	Dendrobatidae	Colostethinae	Ameerega	berohoka	Ameerega berohoka			Ameerega berohoka			Least Concern (LC)	BR		Ameerega berohoka	FALSE	FALSE	FALSE	FALSE	TRUE	TRUE	TRUE	II	FALSE	FALSE	TRUE	Ameerega berohoka Vaz-Silva and Maciel, 2011	2011
Anura	Dendrobatidae	Colostethinae	Ameerega	bilinguis	Ameerega bilinguis			Ameerega bilinguis	Epipedobates bilinguis	Epipedobates bilinguis	Least Concern (LC)	CO,EC,PE		Ameerega bilinguis	FALSE	FALSE	FALSE	TRUE	TRUE	TRUE	TRUE	II	FALSE	FALSE	TRUE	Ameerega bilinguis (Jungfer, 1989)	1989
Anura	Dendrobatidae	Colostethinae	Ameerega	boliviana	Ameerega boliviana			Ameerega boliviana	Epipedobates bolivianus	Epipedobates bolivianus	Least Concern (LC)	BO		Ameerega boliviana	FALSE	FALSE	FALSE	TRUE	TRUE	TRUE	TRUE	II	FALSE	FALSE	TRUE	Ameerega boliviana (Boulenger, 1902)	1902
Anura	Dendrobatidae	Colostethinae	Ameerega	braccata	Ameerega braccata			Ameerega braccata	Epipedobates braccatus	Epipedobates braccatus	Least Concern (LC)	BR		Ameerega braccata	FALSE	FALSE	FALSE	FALSE	TRUE	TRUE	TRUE	II	FALSE	FALSE	TRUE	Ameerega braccata (Steindachner, 1864)	1864
Anura	Dendrobatidae	Colostethinae	Ameerega	cainarachi	Ameerega cainarachi			Ameerega cainarachi	Epipedobates cainarachi	Epipedobates cainarachi	Vulnerable (VU)	PE		Ameerega cainarachi	FALSE	FALSE	FALSE	TRUE	TRUE	TRUE	TRUE	II	TRUE	TRUE	TRUE	Ameerega cainarachi (Schulte, 1989)	1989
Anura	Dendrobatidae	Colostethinae	Ameerega	erythromos	Ameerega erythromos			Ameerega erythromos	Epipedobates erythromos	Epipedobates erythromos	Data Deficient (DD)	EC		Ameerega erythromos	FALSE	FALSE	FALSE	FALSE	TRUE	TRUE	TRUE	II	FALSE	FALSE	TRUE	Paruwrobates erythromos (Vigle and Miyata, 1980)	1980
Anura	Dendrobatidae	Colostethinae	Ameerega	flavopicta	Ameerega flavopicta			Ameerega flavopicta	Epipedobates flavopictus	Epipedobates flavopictus	Least Concern (LC)	BR		Ameerega flavopicta	FALSE	FALSE	FALSE	FALSE	FALSE	FALSE	TRUE	II	FALSE	TRUE	TRUE	Ameerega flavopicta (Lutz, 1925)	1925
Anura	Dendrobatidae	Colostethinae	Ameerega	hahneli	Ameerega hahneli			Ameerega hahneli	Epipedobates hahneli	Epipedobates hahneli	Least Concern (LC)	BO,BR,CO,EC,PE,SR		Ameerega hahneli	TRUE	FALSE	TRUE	TRUE	TRUE	TRUE	TRUE	II	TRUE	FALSE	TRUE	Ameerega hahneli (Boulenger, 1884)	1884
Anura	Dendrobatidae	Colostethinae	Ameerega	macero	Ameerega macero			Ameerega macero	Epipedobates macero	Epipedobates macero	Least Concern (LC)	BR,PE		Ameerega macero	FALSE	TRUE	TRUE	TRUE	TRUE	TRUE	TRUE	II	FALSE	TRUE	TRUE	Ameerega macero (Rodriguez and Myers, 1993)	1993
Anura	Dendrobatidae	Colostethinae	Ameerega	maculata	Ameerega maculata		Confusing Poison Frog	Ameerega maculata	Epipedobates maculatus	Epipedobates maculatus	Data Deficient (DD)	PA		Ameerega maculata	FALSE	FALSE	FALSE	TRUE	TRUE	TRUE	TRUE	II	FALSE	FALSE	TRUE	Peters, 1873	1873
Anura	Dendrobatidae	Colostethinae	Ameerega	parvula	Ameerega parvula		Ruby Poison Frog, Rana Venenosa	Ameerega parvula	Epipedobates parvulus	Epipedobates parvulus	Least Concern (LC)	PE,EC,CO		Ameerega parvula	FALSE	FALSE	FALSE	TRUE	TRUE	TRUE	TRUE	II	TRUE	TRUE	TRUE	Ameerega parvula (Boulenger, 1882)	1882
Anura	Dendrobatidae	Colostethinae	Ameerega	pepperi	Ameerega pepperi						NA	PE		Ameerega pepperi	TRUE	TRUE	TRUE	FALSE	TRUE	TRUE	TRUE	II	TRUE	FALSE	TRUE	Ameerega pepperi Brown and Twomey, 2009	2009
Anura	Dendrobatidae	Colostethinae	Ameerega	petersi	Ameerega petersi			Ameerega petersi	Ameerega smaragdina, Epipedobates petersi	Epipedobates petersi	Least Concern (LC)	BR,PE		Ameerega petersi	FALSE	FALSE	FALSE	FALSE	TRUE	TRUE	TRUE	II	FALSE	FALSE	TRUE	Ameerega petersi (Silverstone, 1976)	1976
Anura	Dendrobatidae	Colostethinae	Ameerega	picta	Ameerega picta			Ameerega picta	Epipedobates pictus	Epipedobates pictus	Least Concern (LC)	VE,SR,PE,PY,GY,GF,EC,CO,BR,BO	A subspecies, guayanensis, has been recorded from Brazil, and the authors of the account suggest that it be raised to full species level (Avila-Pires et al. 2010 Bol. Mus. Para. Emilio Goeldi)	Ameerega picta	TRUE	TRUE	TRUE	TRUE	TRUE	TRUE	TRUE	II	TRUE	TRUE	TRUE	Ameerega picta (Tschudi, 1838)	1838
Anura	Dendrobatidae	Colostethinae	Ameerega	pongoensis	Ameerega pongoensis			Ameerega pongoensis	Epipedobates pongoensis	Epipedobates pongoensis	Vulnerable (VU)	PE		Ameerega pongoensis	FALSE	FALSE	FALSE	FALSE	TRUE	TRUE	TRUE	II	TRUE	TRUE	TRUE	Ameerega pongoensis (Schulte, 1999)	1999
Anura	Dendrobatidae	Colostethinae	Ameerega	pulchripecta	Ameerega pulchripecta			Ameerega pulchripecta	Epipedobates pulchripectus	Epipedobates pulchripectus	Data Deficient (DD)	BR		Ameerega pulchripecta	FALSE	FALSE	FALSE	FALSE	TRUE	TRUE	TRUE	II	FALSE	TRUE	TRUE	Ameerega pulchripecta (Silverstone, 1976)	1976
Anura	Dendrobatidae	Colostethinae	Ameerega	rubriventris	Ameerega rubriventris			Ameerega rubriventris	Epipedobates rubriventris	Epipedobates rubriventris	Data Deficient (DD)	PE		Ameerega rubriventris	FALSE	FALSE	FALSE	FALSE	TRUE	TRUE	TRUE	II	FALSE	TRUE	TRUE	Ameerega rubriventris (Lötters, Debold, Henle, Glaw, and Kneller, 1997)	1997
Anura	Dendrobatidae	Colostethinae	Ameerega	silverstonei	Ameerega silverstonei		Silverstone's Poison Frog, Rana Venenosa	Ameerega silverstonei	Epipedobates silverstonei	Epipedobates silverstonei	Endangered (EN)	PE		Ameerega silverstonei	TRUE	TRUE	TRUE	TRUE	TRUE	TRUE	TRUE	II	TRUE	TRUE	TRUE	Ameerega silverstonei (Myers and Daly, 1979)	1979
Anura	Dendrobatidae	Colostethinae	Ameerega	simulans	Ameerega simulans			Ameerega simulans	Epipedobates simulans	Epipedobates simulans	Least Concern (LC)	PE		Ameerega simulans	FALSE	FALSE	FALSE	FALSE	TRUE	TRUE	TRUE	II	FALSE	FALSE	TRUE	Ameerega simulans (Myers, Rodriguez, and Icochea, 1998)	1998
Anura	Dendrobatidae	Colostethinae	Ameerega	trivittata	Ameerega trivittata		Three-striped Poison Frog (English), groengestreepte gifkikker (Dutch), tidetide (Sranan), Sapito Dargo Trillistado (Spanish)	Ameerega trivittata	Epipedobates trivittatus	Epipedobates trivittatus	Least Concern (LC)	BO,BR,CO,EC,GF,GY,PE,SR,VE		Ameerega trivittata	TRUE	TRUE	TRUE	TRUE	TRUE	TRUE	TRUE	II	TRUE	TRUE	TRUE	Ameerega trivittata (Spix, 1824)	1824
Anura	Pyxicephalidae	Cacosterninae	Amietia	angolensis	Amietia angolensis		Angola River Frog	Amietia angolensis	Afrana angolensis	Afrana angolensis	Least Concern (LC)	AO		Amietia angolensis	FALSE	FALSE	FALSE	TRUE	FALSE	TRUE	FALSE	FALSE	TRUE	FALSE	TRUE	Amietia angolensis (Bocage, 1866)	1866
Anura	Pyxicephalidae	Cacosterninae	Amietia	vertebralis	Amietia vertebralis		Large-mouthed frog	Amietia vertebralis	Amietia umbraculata		Least Concern (LC)	LS,ZA		Amietia vertebralis	FALSE	FALSE	FALSE	FALSE	FALSE	FALSE	FALSE	FALSE	FALSE	TRUE	TRUE	Amietia vertebralis (Hewitt, 1927)	1927
Anura	Ranidae		Amnirana	albolabris	Amnirana albolabris			Amnirana albolabris	Hylarana albolabris, Rana albolabris, Limnodytes albolabris	Amnirana albolabris	Least Concern (LC)	AO,BJ,CM,CF,CG,CD,CI,GQ,GA,GH,GN,KE,LR,NG,SL,TZ,TG,UG		Amnirana albolabris	FALSE	FALSE	FALSE	TRUE	FALSE	TRUE	FALSE	FALSE	FALSE	FALSE	TRUE	Amnirana albolabris (Hallowell, 1856)	1856
Anura	Ranidae		Amnirana	amnicola	Amnirana amnicola			Amnirana amnicola	Hylarana amnicola	Amnirana amnicola	Least Concern (LC)	GA,CM		Amnirana amnicola	FALSE	FALSE	FALSE	TRUE	FALSE	TRUE	FALSE	FALSE	FALSE	FALSE	TRUE	Amnirana amnicola (Perret, 1977)	1977
Anura	Ranidae		Amnirana	galamensis	Amnirana galamensis		Galam white-lipped frog	Amnirana galamensis		Amnirana galamensis	Least Concern (LC)	BJ,BF,CM,CF,CD,CI,ER,ET,GM,GH,GW,KE,MW,ML,MZ,NG,SN,SL,SO,SS,TZ,UG,ZM		Amnirana galamensis	FALSE	FALSE	FALSE	TRUE	FALSE	TRUE	FALSE	FALSE	FALSE	TRUE	TRUE	Amnirana galamensis (Duméril and Bibron, 1841)	1841
Anura	Ranidae		Amolops	caelumnoctis	Amolops caelumnoctis			Amolops caelumnoctis			Data Deficient (DD)	CN		Amolops caelumnoctis	FALSE	FALSE	FALSE	FALSE	FALSE	FALSE	FALSE	FALSE	FALSE	TRUE	TRUE	Amolops caelumnoctis Rao and Wilkinson, 2007	2007
Anura	Ranidae		Amolops	chunganensis	Amolops chunganensis			Amolops chunganensis			Least Concern (LC)	CN,VN		Amolops chunganensis	FALSE	FALSE	FALSE	FALSE	FALSE	FALSE	FALSE	FALSE	FALSE	TRUE	TRUE	Amolops chunganensis (Pope, 1929)	1929
Anura	Ranidae		Amolops	cremnobatus	Amolops cremnobatus			Amolops cremnobatus			Least Concern (LC)	LA,VN		Amolops cremnobatus	FALSE	FALSE	FALSE	TRUE	FALSE	TRUE	FALSE	FALSE	FALSE	TRUE	TRUE	Amolops cremnobatus Inger and Kottelat, 1998	1998
Anura	Ranidae		Amolops	formosus	Amolops formosus			Amolops formosus	Polypedates formosus		Least Concern (LC)	IN,NP		Amolops formosus	FALSE	FALSE	FALSE	FALSE	FALSE	FALSE	FALSE	FALSE	FALSE	TRUE	TRUE	Amolops formosus (Günther, 1876)	1876
Anura	Ranidae		Amolops	hainanensis	Amolops hainanensis		Hainan Torrent Frog	Amolops hainanensis			Endangered (EN)	CN		Amolops hainanensis	FALSE	FALSE	FALSE	FALSE	FALSE	FALSE	FALSE	FALSE	FALSE	TRUE	TRUE	Amolops hainanensis (Boulenger, 1900)	1900
Anura	Ranidae		Amolops	larutensis	Amolops larutensis		Larut Torrent Frog	Amolops larutensis			Least Concern (LC)	MY		Amolops larutensis	FALSE	FALSE	FALSE	TRUE	FALSE	TRUE	FALSE	FALSE	FALSE	FALSE	TRUE	Amolops larutensis (Boulenger, 1899)	1899
Anura	Ranidae		Amolops	loloensis	Amolops loloensis			Amolops loloensis	Amolops liangshanensis		Vulnerable (VU)	CN		Amolops loloensis	FALSE	FALSE	FALSE	FALSE	FALSE	FALSE	FALSE	FALSE	FALSE	TRUE	TRUE	Amolops loloensis (Liu, 1950)	1950
Anura	Ranidae		Amolops	monticola	Amolops monticola			Amolops monticola			Least Concern (LC)	BT,CN,IN,NP		Amolops monticola	FALSE	FALSE	FALSE	FALSE	FALSE	FALSE	FALSE	FALSE	FALSE	TRUE	TRUE	Amolops monticola (Anderson, 1871)	1871
Anura	Ranidae		Amolops	ricketti	Amolops ricketti			Amolops ricketti			Least Concern (LC)	CN,VN		Amolops ricketti	FALSE	FALSE	FALSE	TRUE	FALSE	TRUE	FALSE	FALSE	FALSE	FALSE	TRUE	Amolops ricketti (Boulenger, 1899)	1899
Caudata	Amphiumidae		Amphiuma	means	Amphiuma means		Two-toed Amphiuma, Conger Eel, Congo Eel, Congo Snake, Lamprey Eel, Ditch Eel, Fish Eel	Amphiuma means			Least Concern (LC)	US		Amphiuma means	TRUE	TRUE	TRUE	TRUE	FALSE	TRUE	FALSE	FALSE	FALSE	FALSE	TRUE	Amphiuma means Garden, 1821	1821
Caudata	Amphiumidae		Amphiuma	pholeter	Amphiuma pholeter		One-toed Amphiuma, Conger Eel, Congo Eel, Congo Snake, Lamprey Eel, Ditch Eel, Fish Eel	Amphiuma pholeter			Near Threatened (NT)	US		Amphiuma pholeter	TRUE	FALSE	TRUE	FALSE	FALSE	TRUE	FALSE	FALSE	FALSE	FALSE	TRUE	Amphiuma pholeter Neill, 1964	1964
Caudata	Amphiumidae		Amphiuma	tridactylum	Amphiuma tridactylum		Three-toed Amphiuma, Conger Eel, Congo Eel, Congo Snake, Lamprey Eel, Ditch Eel, Fish Eel	Amphiuma tridactylum			Least Concern (LC)	US		Amphiuma tridactylum	FALSE	FALSE	FALSE	TRUE	FALSE	TRUE	FALSE	FALSE	TRUE	FALSE	TRUE	Amphiuma tridactylum Cuvier, 1827	1827
Anura	Bufonidae		Anaxyrus	americanus	Anaxyrus americanus		American Toad, Eastern American Toad (<i>A. a. americanus</i>), Dwarf American Toad (<i>A. a. charlesmithi</i>)	Anaxyrus americanus	Bufo americanus, Anaxyrus americanus americanus	Anaxyrus americanus americanus	Least Concern (LC)	US,CA		Anaxyrus americanus	TRUE	FALSE	TRUE	FALSE	FALSE	TRUE	FALSE	FALSE	TRUE	FALSE	TRUE	Anaxyrus americanus (Holbrook, 1836)	1836
Anura	Bufonidae		Anaxyrus	baxteri	Anaxyrus baxteri		Wyoming Toad	Anaxyrus baxteri	Bufo hemiophrys baxteri, Bufo baxteri	Bufo hemiophrys baxteri, Bufo baxteri	Extinct in the Wild (EW)	US		Anaxyrus baxteri	FALSE	FALSE	FALSE	FALSE	FALSE	FALSE	FALSE	FALSE	TRUE	FALSE	TRUE	Anaxyrus baxteri (Porter, 1968)	1968
Anura	Bufonidae		Anaxyrus	boreas	Anaxyrus boreas		Western Toad, Boreal Toad (<i>B. b. boreas</i>), California Toad (<i>B. b. halophilus</i>)	Anaxyrus boreas	Bufo boreas, Bufo politus	Bufo boreas, Bufo politus	Least Concern (LC)	US,CA,MX		Anaxyrus boreas	FALSE	TRUE	TRUE	FALSE	FALSE	TRUE	FALSE	FALSE	FALSE	TRUE	TRUE	Anaxyrus boreas (Baird and Girard, 1852)	1852
Anura	Bufonidae		Anaxyrus	cognatus	Anaxyrus cognatus		Great Plains Toad	Anaxyrus cognatus	Bufo cognatus	Bufo cognatus	Least Concern (LC)	US,MX,CA		Anaxyrus cognatus	TRUE	TRUE	TRUE	TRUE	FALSE	TRUE	FALSE	FALSE	TRUE	TRUE	TRUE	Anaxyrus cognatus (Say, 1822)	1822
Anura	Bufonidae		Anaxyrus	debilis	Anaxyrus debilis		Green Toad, Eastern Green Toad (<i>B. d. debilis</i>), Western Green Toad (<i>B. d. insidior</i>)	Anaxyrus debilis	Anaxyrus debilis debilis	Anaxyrus debilis debilis	Least Concern (LC)	US,MX		Anaxyrus debilis	TRUE	TRUE	TRUE	FALSE	FALSE	TRUE	FALSE	FALSE	TRUE	FALSE	TRUE	Anaxyrus debilis (Girard, 1854)	1854
Anura	Bufonidae		Anaxyrus	exsul	Anaxyrus exsul		Black Toad	Anaxyrus exsul	Bufo exsul	Bufo exsul	Vulnerable (VU)	US		Anaxyrus exsul	FALSE	FALSE	FALSE	TRUE	FALSE	TRUE	FALSE	FALSE	FALSE	FALSE	TRUE	Anaxyrus exsul (Myers, 1942)	1942
Anura	Bufonidae		Anaxyrus	fowleri	Anaxyrus fowleri		Fowler's Toad	Anaxyrus fowleri	Bufo woodhousii fowleri, Bufo fowleri, Bufo woodhousii velatus	Bufo woodhousii fowleri, Bufo fowleri, Bufo woodhousii velatus	Least Concern (LC)	CA,US		Anaxyrus fowleri	TRUE	TRUE	TRUE	FALSE	FALSE	TRUE	FALSE	FALSE	FALSE	FALSE	TRUE	Anaxyrus fowleri (Hinckley, 1882)	1882
Anura	Bufonidae		Anaxyrus	microscaphus	Anaxyrus microscaphus		Arizona Toad	Anaxyrus microscaphus	Bufo microscaphus, Bufo microscaphus microscaphus	Bufo microscaphus, Bufo microscaphus microscaphus	Least Concern (LC)	US		Anaxyrus microscaphus	FALSE	FALSE	FALSE	FALSE	FALSE	FALSE	FALSE	FALSE	TRUE	FALSE	TRUE	Anaxyrus microscaphus (Cope, 1867)	1867
Anura	Bufonidae		Anaxyrus	punctatus	Anaxyrus punctatus		Red-Spotted Toad	Anaxyrus punctatus	Bufo punctatus	Bufo punctatus	Least Concern (LC)	US,MX		Anaxyrus punctatus	TRUE	TRUE	TRUE	TRUE	FALSE	TRUE	FALSE	FALSE	TRUE	FALSE	TRUE	Anaxyrus punctatus (Baird and Girard, 1852)	1852
Anura	Bufonidae		Anaxyrus	quercicus	Anaxyrus quercicus		Oak Toad	Anaxyrus quercicus	Bufo quercicus	Bufo quercicus	Least Concern (LC)	US		Anaxyrus quercicus	TRUE	TRUE	TRUE	FALSE	FALSE	TRUE	FALSE	FALSE	FALSE	FALSE	TRUE	Anaxyrus quercicus (Holbrook, 1840)	1840
Anura	Bufonidae		Anaxyrus	retiformis	Anaxyrus retiformis		Sonoran Green Toad	Anaxyrus retiformis	Bufo retiformis, Bufo debilis retiformis	Bufo retiformis, Bufo debilis retiformis	Least Concern (LC)	US,MX		Anaxyrus retiformis	TRUE	FALSE	TRUE	FALSE	FALSE	TRUE	FALSE	FALSE	FALSE	TRUE	TRUE	Anaxyrus retiformis (Sanders and Smith, 1951)	1951
Anura	Bufonidae		Anaxyrus	speciosus	Anaxyrus speciosus		Texas Toad	Anaxyrus speciosus	Bufo speciosus	Bufo speciosus	Least Concern (LC)	US,MX		Anaxyrus speciosus	TRUE	TRUE	TRUE	TRUE	FALSE	TRUE	FALSE	FALSE	FALSE	FALSE	TRUE	Anaxyrus speciosus (Girard, 1854)	1854
Anura	Bufonidae		Anaxyrus	terrestris	Anaxyrus terrestris		Southern Toad	Anaxyrus terrestris	Bufo terrestris, Rana terrestris, Buffo clamosus	Bufo terrestris, Rana terrestris, Buffo clamosus	Least Concern (LC)	US		Anaxyrus terrestris	TRUE	TRUE	TRUE	FALSE	FALSE	TRUE	FALSE	FALSE	TRUE	FALSE	TRUE	Anaxyrus terrestris (Bonnaterre, 1789)	1789
Anura	Bufonidae		Anaxyrus	woodhousii	Anaxyrus woodhousii		Woodhouse's Toad, Southwestern Woodhouse's Toad (<i>B. w. australis</i>), East Texas Toad (<i>B. w. velatus</i>), Rocky Mountain Toad or Woodhouse's Toad (<i>B. w. woodhousii</i>),	Anaxyrus woodhousii	Anaxyrus woodhousii woodhousii, Bufo woodhousii woodhousii	Anaxyrus woodhousii woodhousii	Least Concern (LC)	US,MX,CA		Anaxyrus woodhousii	TRUE	FALSE	TRUE	FALSE	FALSE	TRUE	FALSE	FALSE	FALSE	FALSE	TRUE	Anaxyrus woodhousii (Girard, 1854)	1854
Anura	Dendrobatidae	Dendrobatinae	Andinobates	abditus	Andinobates abditus			Andinobates abditus	Ranitomeya abdita	Ranitomeya abdita	Critically Endangered (CR)	EC		Andinobates abditus	FALSE	FALSE	FALSE	FALSE	TRUE	TRUE	TRUE	II	TRUE	FALSE	TRUE	Andinobates abditus (Myers and Daly, 1976)	1976
Anura	Dendrobatidae	Dendrobatinae	Andinobates	bombetes	Andinobates bombetes		Cauca Poison Frog	Andinobates bombetes	Ranitomeya bombetes	Ranitomeya bombetes	Vulnerable (VU)	CO		Andinobates bombetes	FALSE	FALSE	FALSE	FALSE	TRUE	TRUE	TRUE	II	FALSE	TRUE	TRUE	Andinobates bombetes (Myers and Daly, 1980)	1980
Anura	Dendrobatidae	Dendrobatinae	Andinobates	claudiae	Andinobates claudiae			Andinobates claudiae	Ranitomeya claudiae	Ranitomeya claudiae	Data Deficient (DD)	PA		Andinobates claudiae	FALSE	FALSE	FALSE	TRUE	TRUE	TRUE	TRUE	II	FALSE	TRUE	TRUE	Andinobates claudiae (Jungfer, Lötters, and Jörgens, 2000)	2000
Anura	Dendrobatidae	Dendrobatinae	Andinobates	dorisswansonae	Andinobates dorisswansonae			Andinobates dorisswansonae			Vulnerable (VU)	CO		Andinobates dorisswansonae	FALSE	FALSE	FALSE	FALSE	FALSE	FALSE	TRUE	II	FALSE	TRUE	TRUE	Andinobates dorisswansonae (Rueda-Almonacid, Rada, Sánchez-Pacheco, Velásquez-Álvarez, and Quevedo-Gil, 2006)	2006
Anura	Dendrobatidae	Dendrobatinae	Andinobates	fulguritus	Andinobates fulguritus		Yellow-bellied poison frog	Andinobates fulguritus	Ranitomeya fulgurita	Ranitomeya fulgurita	Least Concern (LC)	PA,CO		Andinobates fulguritus	FALSE	FALSE	FALSE	FALSE	TRUE	TRUE	TRUE	II	FALSE	FALSE	TRUE	Andinobates fulguritus (Silverstone, 1975)	1975
Anura	Dendrobatidae	Dendrobatinae	Andinobates	minutus	Andinobates minutus			Andinobates minutus	Dendrobates shrevei, Minyobates minutus, Ranitomeya minuta	Dendrobates shrevei, Minyobates minutus, Ranitomeya minuta	Least Concern (LC)	PA,CO		Andinobates minutus	FALSE	TRUE	TRUE	FALSE	TRUE	TRUE	TRUE	II	FALSE	FALSE	TRUE	Andinobates minutus (Shreve, 1935)	1935
Anura	Dendrobatidae	Dendrobatinae	Andinobates	opisthomelas	Andinobates opisthomelas			Andinobates opisthomelas	Ranitomeya opisthomelas	Ranitomeya opisthomelas	Vulnerable (VU)	CO		Andinobates opisthomelas	FALSE	FALSE	FALSE	FALSE	FALSE	FALSE	TRUE	II	FALSE	TRUE	TRUE	Andinobates opisthomelas (Boulenger, 1899)	1899
Anura	Dendrobatidae	Dendrobatinae	Andinobates	victimatus	Andinobates victimatus						NA	CO		Andinobates victimatus	FALSE	FALSE	FALSE	FALSE	FALSE	FALSE	FALSE	FALSE	FALSE	TRUE	TRUE	Andinobates victimatus Márquez, Mejía-Vargas, Palacios-Rodríguez, Ramírez-Castañeda, and Amézquita, 2017	2017
Anura	Dendrobatidae	Dendrobatinae	Andinobates	viridis	Andinobates viridis			Andinobates viridis	Ranitomeya viridis	Ranitomeya viridis	Critically Endangered (CR)	CO		Andinobates viridis	FALSE	FALSE	FALSE	FALSE	TRUE	TRUE	TRUE	II	FALSE	FALSE	TRUE	Andinobates viridis (Myers and Daly, 1976)	1976
Anura	Dendrobatidae	Dendrobatinae	Andinobates	virolinensis	Andinobates virolinensis			Andinobates virolinensis	Minyobates virolinensis, Ranitomeya virolinensis	Minyobates virolinensis, Ranitomeya virolinensis	Vulnerable (VU)	CO		Andinobates virolinensis	FALSE	FALSE	FALSE	FALSE	FALSE	FALSE	FALSE	FALSE	FALSE	TRUE	TRUE	Andinobates virolinensis (Ruiz-Carranza and Ramírez-Pinilla, 1992)	1992
Caudata	Cryptobranchidae		Andrias	davidianus	Andrias davidianus		Chinese Giant Salamander	Andrias davidianus			Critically Endangered (CR)	TW,CN		Andrias davidianus	TRUE	TRUE	TRUE	TRUE	TRUE	TRUE	TRUE	I	TRUE	FALSE	TRUE	Andrias davidianus (Blanchard, 1871)	1871
Caudata	Cryptobranchidae		Andrias	japonicus	Andrias japonicus		Japanese Giant Salamander	Andrias japonicus			Near Threatened (NT)	JP		Andrias japonicus	TRUE	FALSE	TRUE	TRUE	TRUE	TRUE	TRUE	I	FALSE	FALSE	TRUE	Andrias japonicus (Temminck, 1836)	1836
Caudata	Plethodontidae	Plethodontinae	Aneides	aeneus	Aneides aeneus	Castaneides	Green Salamander	Aneides aeneus	Plethodon aeneus	Plethodon aeneus	Near Threatened (NT)	US		Aneides aeneus	TRUE	FALSE	TRUE	FALSE	FALSE	TRUE	FALSE	FALSE	FALSE	FALSE	TRUE	Aneides aeneus (Cope and Packard, 1881)	1881
Caudata	Plethodontidae	Plethodontinae	Aneides	flavipunctatus	Aneides flavipunctatus	Aneides	Black Salamander, Speckled Black Salamander	Aneides flavipunctatus	Plethodon flavipunctatus	Plethodon flavipunctatus	Near Threatened (NT)	US	Reilly & Wake (2019, PeerJ DOI 10.7717/peerj.7370), building on earlier papers by Rissler & Apodaca (2007, Syst Biol 56: 924-942) and Reilly & Wake (2015, J Biogeog 42: 280-291), revised the taxonomy of a species complex and recognized four species: A. f	Aneides flavipunctatus	TRUE	TRUE	TRUE	TRUE	FALSE	TRUE	FALSE	FALSE	FALSE	FALSE	TRUE	Aneides flavipunctatus (Strauch, 1870)	1870
Caudata	Plethodontidae	Plethodontinae	Aneides	lugubris	Aneides lugubris	Aneides	Arboreal Salamander	Aneides lugubris	Salamandra lugubris	Salamandra lugubris	Least Concern (LC)	US,MX		Aneides lugubris	TRUE	TRUE	TRUE	TRUE	FALSE	TRUE	FALSE	FALSE	TRUE	FALSE	TRUE	Aneides lugubris (Hallowell, 1849)	1849
Anura	Hylidae	Hylinae	Anotheca	spinosa	Anotheca spinosa		Coronated Treefrog	Anotheca spinosa			Least Concern (LC)	CR,HN,MX,PA		Anotheca spinosa	TRUE	TRUE	TRUE	TRUE	FALSE	TRUE	FALSE	FALSE	TRUE	FALSE	TRUE	Triprion spinosus (Steindachner, 1864)	1864
Anura	Bufonidae		Ansonia	inthanon	Ansonia inthanon			Ansonia inthanon			Least Concern (LC)	TH		Ansonia inthanon	FALSE	FALSE	FALSE	FALSE	FALSE	FALSE	FALSE	FALSE	FALSE	TRUE	TRUE	Ansonia inthanon Matsui, Nabhitabhata, and Panha, 1998	1998
Anura	Bufonidae		Ansonia	spinulifer	Ansonia spinulifer			Ansonia spinulifer			Near Threatened (NT)	MY		Ansonia spinulifer	FALSE	FALSE	FALSE	TRUE	FALSE	TRUE	FALSE	FALSE	FALSE	FALSE	TRUE	Ansonia spinulifer (Mocquard, 1890)	1890
Anura	Arthroleptidae		Arthroleptis	adelphus	Arthroleptis adelphus			Arthroleptis adelphus			Least Concern (LC)	CM,GA		Arthroleptis adelphus	FALSE	FALSE	FALSE	TRUE	FALSE	TRUE	FALSE	FALSE	FALSE	FALSE	TRUE	Arthroleptis adelphus Perret, 1966	1966
Anura	Arthroleptidae		Arthroleptis	adolfifriederici	Arthroleptis adolfifriederici			Arthroleptis adolfifriederici			Least Concern (LC)	MW,TZ,KE,UG,BI,RW,CD		Arthroleptis adolfifriederici	FALSE	FALSE	FALSE	TRUE	FALSE	TRUE	FALSE	FALSE	FALSE	FALSE	TRUE	Arthroleptis adolfifriederici Nieden, 1911	1911
Anura	Arthroleptidae		Arthroleptis	loveridgei	Arthroleptis loveridgei			Arthroleptis loveridgei	Schoutedenella loveridgei	Schoutedenella loveridgei	Data Deficient (DD)	CD		Arthroleptis loveridgei	FALSE	FALSE	FALSE	TRUE	FALSE	TRUE	FALSE	FALSE	FALSE	FALSE	TRUE	Arthroleptis loveridgei De Witte, 1933	1933
Anura	Arthroleptidae		Arthroleptis	poecilonotus	Arthroleptis poecilonotus			Arthroleptis poecilonotus			Least Concern (LC)	BJ,CM,CG,CD,CI,GQ,GA,GH,GN,GW,LR,NG,SS,TG,UG		Arthroleptis poecilonotus	TRUE	FALSE	TRUE	TRUE	FALSE	TRUE	FALSE	FALSE	FALSE	FALSE	TRUE	Arthroleptis poecilonotus Peters, 1863	1863
Anura	Arthroleptidae		Arthroleptis	pyrrhoscelis	Arthroleptis pyrrhoscelis			Arthroleptis pyrrhoscelis	Schoutedenella pyrrhoscelis	Schoutedenella pyrrhoscelis	Least Concern (LC)	CD		Arthroleptis pyrrhoscelis	FALSE	FALSE	FALSE	TRUE	FALSE	TRUE	FALSE	FALSE	FALSE	FALSE	TRUE	Arthroleptis pyrrhoscelis Laurent, 1952	1952
Anura	Arthroleptidae		Arthroleptis	stenodactylus	Arthroleptis stenodactylus		Common Squeaker, Shovel Footed Squeaker, Dune Squeaker, Savanna Squeaking Frog	Arthroleptis stenodactylus			Least Concern (LC)	AO,BW,CD,KE,MW,MZ,ZA,TZ,ZM,ZW		Arthroleptis stenodactylus	FALSE	FALSE	FALSE	TRUE	FALSE	TRUE	FALSE	FALSE	FALSE	FALSE	TRUE	Arthroleptis stenodactylus Pfeffer, 1893	1893
Anura	Arthroleptidae		Arthroleptis	sylvaticus	Arthroleptis sylvaticus			Arthroleptis sylvaticus	Schoutedenella sylvatica	Schoutedenella sylvatica	Least Concern (LC)	CM,CF,CG,CD,GA		Arthroleptis sylvaticus	FALSE	FALSE	FALSE	TRUE	FALSE	TRUE	FALSE	FALSE	FALSE	FALSE	TRUE	Arthroleptis sylvaticus (Laurent, 1954)	1954
Anura	Arthroleptidae		Arthroleptis	variabilis	Arthroleptis variabilis			Arthroleptis variabilis			Least Concern (LC)	CM,CF,CG,CD,CI,GQ,GA,GH,GN,LR,NG		Arthroleptis variabilis	FALSE	FALSE	FALSE	TRUE	FALSE	TRUE	FALSE	FALSE	FALSE	FALSE	TRUE	Arthroleptis variabilis Matschie, 1893	1893
Anura	Arthroleptidae		Arthroleptis	xenodactyloides	Arthroleptis xenodactyloides		Dwarf squeaker	Arthroleptis xenodactyloides	Schoutedenella xenodactyloides	Schoutedenella xenodactyloides	Least Concern (LC)	MZ,TZ,ZM,ZW		Arthroleptis xenodactyloides	FALSE	FALSE	FALSE	TRUE	FALSE	TRUE	FALSE	FALSE	FALSE	FALSE	TRUE	Arthroleptis xenodactyloides Hewitt, 1933	1933
Anura	Arthroleptidae		Arthroleptis	xenodactylus	Arthroleptis xenodactylus			Arthroleptis xenodactylus	Schoutedenella xenodactyla	Schoutedenella xenodactyla	Endangered (EN)	TZ		Arthroleptis xenodactylus	FALSE	FALSE	FALSE	TRUE	FALSE	TRUE	FALSE	FALSE	FALSE	FALSE	TRUE	Arthroleptis xenodactylus Boulenger, 1909	1909
Anura	Arthroleptidae		Astylosternus	batesi	Astylosternus batesi			Astylosternus batesi			Least Concern (LC)	CM,CF,CG,CD,GQ,GA		Astylosternus batesi	FALSE	FALSE	FALSE	TRUE	FALSE	TRUE	FALSE	FALSE	FALSE	FALSE	TRUE	Astylosternus batesi (Boulenger, 1900)	1900
Anura	Bufonidae		Atelopus	balios	Atelopus balios			Atelopus balios			Critically Endangered (CR)	EC		Atelopus balios	TRUE	FALSE	TRUE	FALSE	FALSE	TRUE	FALSE	FALSE	FALSE	FALSE	TRUE	Atelopus balios Peters, 1973	1973
Anura	Bufonidae		Atelopus	barbotini	Atelopus barbotini						NA	GF		Atelopus barbotini	TRUE	FALSE	TRUE	FALSE	FALSE	TRUE	FALSE	FALSE	FALSE	FALSE	TRUE	Atelopus barbotini Lescure, 1981	1981
Anura	Bufonidae		Atelopus	carbonerensis	Atelopus carbonerensis			Atelopus carbonerensis			Critically Endangered (CR)	VE		Atelopus carbonerensis	FALSE	FALSE	FALSE	FALSE	FALSE	FALSE	FALSE	FALSE	FALSE	TRUE	TRUE	Atelopus carbonerensis Rivero, 1974	1974
Anura	Bufonidae		Atelopus	certus	Atelopus certus			Atelopus certus			Endangered (EN)	PA		Atelopus certus	FALSE	FALSE	FALSE	TRUE	FALSE	TRUE	FALSE	FALSE	FALSE	FALSE	TRUE	Atelopus certus Barbour, 1923	1923
Anura	Bufonidae		Atelopus	cruciger	Atelopus cruciger		Rancho Grande Harlequin Frog	Atelopus cruciger			Critically Endangered (CR)	VE		Atelopus cruciger	FALSE	FALSE	FALSE	FALSE	FALSE	FALSE	FALSE	FALSE	FALSE	TRUE	TRUE	Atelopus cruciger (Lichtenstein and Martens, 1856)	1856
Anura	Bufonidae		Atelopus	elegans	Atelopus elegans			Atelopus elegans			Critically Endangered (CR)	EC,CO		Atelopus elegans	TRUE	FALSE	TRUE	FALSE	FALSE	TRUE	FALSE	FALSE	FALSE	FALSE	TRUE	Atelopus elegans (Boulenger, 1882)	1882
Anura	Bufonidae		Atelopus	flavescens	Atelopus flavescens			Atelopus flavescens			Vulnerable (VU)	BR,GF,GY		Atelopus flavescens	FALSE	FALSE	FALSE	FALSE	FALSE	FALSE	FALSE	FALSE	FALSE	TRUE	TRUE	Atelopus flavescens Duméril and Bibron, 1841	1841
Anura	Bufonidae		Atelopus	franciscus	Atelopus franciscus			Atelopus franciscus			Vulnerable (VU)	GF		Atelopus franciscus	FALSE	FALSE	FALSE	FALSE	FALSE	FALSE	FALSE	FALSE	FALSE	TRUE	TRUE	Atelopus franciscus Lescure, 1974	1974
Anura	Bufonidae		Atelopus	glyphus	Atelopus glyphus		Pirri Harlequin Frog	Atelopus glyphus			Critically Endangered (CR)	PA,CO		Atelopus glyphus	FALSE	FALSE	FALSE	TRUE	FALSE	TRUE	FALSE	FALSE	FALSE	TRUE	TRUE	Atelopus glyphus Dunn, 1931	1931
Anura	Bufonidae		Atelopus	hoogmoedi	Atelopus hoogmoedi						NA	BR,GF,GY,SR		Atelopus hoogmoedi	FALSE	TRUE	TRUE	FALSE	FALSE	TRUE	FALSE	FALSE	FALSE	FALSE	TRUE	Atelopus hoogmoedi Lescure, 1974	1974
Anura	Bufonidae		Atelopus	ignescens	Atelopus ignescens		Jambato Toad	Atelopus ignescens	Atelopus carinatus	Atelopus carinatus	Critically Endangered (CR)	EC,CO		Atelopus ignescens	FALSE	FALSE	FALSE	FALSE	FALSE	FALSE	FALSE	FALSE	FALSE	TRUE	TRUE	Atelopus ignescens (Cornalia, 1849)	1849
Anura	Bufonidae		Atelopus	limosus	Atelopus limosus		Limosa Harlequin Frog	Atelopus limosus			Endangered (EN)	PA		Atelopus limosus	FALSE	FALSE	FALSE	TRUE	FALSE	TRUE	FALSE	FALSE	TRUE	FALSE	TRUE	Atelopus limosus Ibáñez, Jaramillo, and Solís, 1995	1995
Anura	Bufonidae		Atelopus	peruensis	Atelopus peruensis			Atelopus peruensis			Critically Endangered (CR)	PE		Atelopus peruensis	FALSE	FALSE	FALSE	FALSE	FALSE	FALSE	FALSE	FALSE	FALSE	TRUE	TRUE	Atelopus peruensis Gray and Cannatella, 1985	1985
Anura	Bufonidae		Atelopus	pulcher	Atelopus pulcher			Atelopus pulcher			Critically Endangered (CR)	PE		Atelopus pulcher	TRUE	TRUE	TRUE	FALSE	FALSE	TRUE	FALSE	FALSE	FALSE	TRUE	TRUE	Atelopus pulcher (Boulenger, 1882)	1882
Anura	Bufonidae		Atelopus	senex	Atelopus senex			Atelopus senex			Critically Endangered (CR)	CR		Atelopus senex	FALSE	FALSE	FALSE	FALSE	FALSE	FALSE	FALSE	FALSE	FALSE	TRUE	TRUE	Atelopus senex Taylor, 1952	1952
Anura	Bufonidae		Atelopus	siranus	Atelopus siranus			Atelopus siranus			Data Deficient (DD)	PE		Atelopus siranus	FALSE	FALSE	FALSE	FALSE	FALSE	FALSE	FALSE	FALSE	FALSE	TRUE	TRUE	Atelopus siranus Lötters and Henzl, 2000	2000
Anura	Bufonidae		Atelopus	spumarius	Atelopus spumarius			Atelopus spumarius			Vulnerable (VU)	BR,CO,EC,GF,GY,PE,SR		Atelopus spumarius	TRUE	TRUE	TRUE	TRUE	FALSE	TRUE	FALSE	FALSE	TRUE	FALSE	TRUE	Atelopus spumarius Cope, 1871	1871
Anura	Bufonidae		Atelopus	spurrelli	Atelopus spurrelli			Atelopus spurrelli			Near Threatened (NT)	CO		Atelopus spurrelli	FALSE	FALSE	FALSE	FALSE	FALSE	FALSE	FALSE	FALSE	FALSE	TRUE	TRUE	Atelopus spurrelli Boulenger, 1914	1914
Anura	Bufonidae		Atelopus	varius	Atelopus varius		Harlequin Frog, Clown Frog	Atelopus varius			Critically Endangered (CR)	CO,PA,CR		Atelopus varius	FALSE	TRUE	TRUE	TRUE	FALSE	TRUE	FALSE	FALSE	FALSE	TRUE	TRUE	Atelopus varius (Lichtenstein and Martens, 1856)	1856
Anura	Bufonidae		Atelopus	zeteki	Atelopus zeteki		Panamanian Golden Frog	Atelopus zeteki			Critically Endangered (CR)	PA		Atelopus zeteki	FALSE	FALSE	FALSE	TRUE	TRUE	TRUE	TRUE	I	TRUE	TRUE	TRUE	Atelopus zeteki Dunn, 1933	1933
Anura	Pyxicephalidae	Pyxicephalinae	Aubria	masako	Aubria masako		Masako fishing frog	Aubria masako			Least Concern (LC)	CM,CF,CG,CD,GA		Aubria masako	FALSE	FALSE	FALSE	TRUE	FALSE	TRUE	FALSE	FALSE	FALSE	FALSE	TRUE	Aubria masako Ohler and Kazadi, 1990	1990
Anura	Pyxicephalidae	Pyxicephalinae	Aubria	subsigillata	Aubria subsigillata			Aubria subsigillata			Least Concern (LC)	CM,CG,CD,GA,GH		Aubria subsigillata	FALSE	FALSE	FALSE	TRUE	FALSE	TRUE	FALSE	FALSE	FALSE	FALSE	TRUE	Aubria subsigillata (Duméril, 1856)	1856
Anura	Microhylidae	Asterophryinae	Austrochaperina	palmipes	Austrochaperina palmipes			Austrochaperina palmipes			Least Concern (LC)	PG		Austrochaperina palmipes	FALSE	FALSE	FALSE	TRUE	FALSE	TRUE	FALSE	FALSE	FALSE	FALSE	TRUE	Austrochaperina palmipes (Zweifel, 1956)	1956
Anura	Microhylidae	Asterophryinae	Austrochaperina	rivularis	Austrochaperina rivularis			Copiula rivularis	Copiula rivularis		Least Concern (LC)	PG		Austrochaperina rivularis	FALSE	FALSE	FALSE	TRUE	FALSE	TRUE	FALSE	FALSE	FALSE	FALSE	TRUE	Copiula rivularis (Zweifel, 2000)	2000
Anura	Bufonidae		Barbarophryne	brongersmai	Barbarophryne brongersmai			Barbarophryne brongersmai	Bufo brongersmai	Bufo brongersmai	Near Threatened (NT)	DZ,MA,EH		Barbarophryne brongersmai	TRUE	TRUE	TRUE	FALSE	FALSE	TRUE	FALSE	FALSE	FALSE	FALSE	TRUE	Barbarophryne brongersmai (Hoogmoed, 1972)	1972
Anura	Bombinatoridae		Barbourula	kalimantanensis	Barbourula kalimantanensis		Kalimantan Jungle Toad, Bornean Flat-headed Frog	Barbourula kalimantanensis			Endangered (EN)	ID		Barbourula kalimantanensis	FALSE	FALSE	FALSE	FALSE	FALSE	FALSE	FALSE	FALSE	FALSE	TRUE	TRUE	Barbourula kalimantanensis Iskandar, 1978	1978
Caudata	Plethodontidae	Hemidactyliinae	Batrachoseps	attenuatus	Batrachoseps attenuatus	Batrachoseps	California Slender Salamander	Batrachoseps attenuatus	Salamandrina attenuata	Salamandrina attenuata	Least Concern (LC)	US		Batrachoseps attenuatus	TRUE	TRUE	TRUE	TRUE	FALSE	TRUE	FALSE	FALSE	FALSE	FALSE	TRUE	Batrachoseps attenuatus (Eschscholtz, 1833)	1833
Caudata	Plethodontidae	Hemidactyliinae	Batrachoseps	stebbinsi	Batrachoseps stebbinsi	Batrachoseps	Tehachapi Slender Salamander	Batrachoseps stebbinsi			Vulnerable (VU)	US		Batrachoseps stebbinsi	FALSE	FALSE	FALSE	TRUE	FALSE	TRUE	FALSE	FALSE	FALSE	FALSE	TRUE	Batrachoseps stebbinsi Brame and Murray, 1968	1968
Caudata	Hynobiidae	Hynobiinae	Batrachuperus	karlschmidti	Batrachuperus karlschmidti	Batrachuperus		Batrachuperus karlschmidti			Vulnerable (VU)	CN		Batrachuperus karlschmidti	FALSE	FALSE	FALSE	FALSE	FALSE	FALSE	FALSE	FALSE	FALSE	TRUE	TRUE	Batrachuperus karlschmidti Liu, 1950	1950
Caudata	Hynobiidae	Hynobiinae	Batrachuperus	londongensis	Batrachuperus londongensis	Batrachuperus	Longdong Stream Salamander	Batrachuperus londongensis			Endangered (EN)	CN		Batrachuperus londongensis	FALSE	FALSE	FALSE	FALSE	FALSE	FALSE	FALSE	FALSE	FALSE	TRUE	TRUE	Batrachuperus londongensis Liu and Tian, 1978	1978
Caudata	Hynobiidae	Hynobiinae	Batrachuperus	pinchonii	Batrachuperus pinchonii	Batrachuperus	Stream Salamander	Batrachuperus pinchonii	Batrachuperus cochranae, Salamandrella sinensis	Batrachuperus cochranae, Salamandrella sinensis	Vulnerable (VU)	CN	Fei, Ye, Jiang 2012 Colored Atlas of Chinese Amphibians recognize B. cochranae, ignoring synonymization with pinchonii by Fu and Zeng, 2008, Mol. Ecol., 17: 1469-1488.	Batrachuperus pinchonii	FALSE	FALSE	FALSE	FALSE	FALSE	FALSE	FALSE	FALSE	FALSE	TRUE	TRUE	Batrachuperus pinchonii (David, 1872)	1872
Caudata	Hynobiidae	Hynobiinae	Batrachuperus	taibaiensis	Batrachuperus taibaiensis	Hynobiinae	Taibai Stream Salamander	Batrachuperus taibaiensis			Data Deficient (DD)	CN		Batrachuperus taibaiensis	FALSE	FALSE	FALSE	FALSE	FALSE	FALSE	FALSE	FALSE	FALSE	TRUE	TRUE	Batrachuperus tibetanus Schmidt, 1925	1925
Caudata	Hynobiidae	Hynobiinae	Batrachuperus	tibetanus	Batrachuperus tibetanus	Batrachuperus	Alpine Stream Salamander	Batrachuperus tibetanus			Vulnerable (VU)	CN		Batrachuperus tibetanus	FALSE	FALSE	FALSE	FALSE	FALSE	FALSE	FALSE	FALSE	FALSE	TRUE	TRUE	Batrachuperus tibetanus Schmidt, 1925	1925
Caudata	Hynobiidae	Hynobiinae	Batrachuperus	yenyuanensis	Batrachuperus yenyuanensis	Tibetuperus	Yenyuan Stream Salamander	Batrachuperus yenyuanensis			Vulnerable (VU)	CN		Batrachuperus yenyuanensis	FALSE	FALSE	FALSE	FALSE	FALSE	FALSE	FALSE	FALSE	FALSE	TRUE	TRUE	Batrachuperus yenyuanensis Liu, 1950	1950
Anura	Hylidae	Hylinae	Boana	aguilari	Boana aguilari				Hypsiboas aguilari		NA	PE		Boana aguilari	FALSE	FALSE	FALSE	TRUE	FALSE	TRUE	FALSE	FALSE	FALSE	FALSE	TRUE	Boana aguilari (Lehr, Faivovich, and Jungfer, 2010)	2010
Anura	Hylidae	Hylinae	Boana	boans	Boana boans		Rusty Treefrog	Hypsiboas boans	Hypsiboas boans, Hyla boans, Rana boans	Hyla boans, Rana boans	Least Concern (LC)	BO,BR,CO,EC,GF,GY,PA,PE,SR,TT,VE		Boana boans	TRUE	TRUE	TRUE	FALSE	FALSE	TRUE	FALSE	FALSE	TRUE	TRUE	TRUE	Boana boans (Linnaeus, 1758)	1758
Anura	Hylidae	Hylinae	Boana	calcarata	Boana calcarata		Convict Treefrog	Hypsiboas calcaratus	Hypsiboas calcaratus, Hyla calcarata	Hyla calcarata	Least Concern (LC)	BR,EC,GF,GY,PE,SR		Boana calcarata	TRUE	TRUE	TRUE	FALSE	FALSE	TRUE	FALSE	FALSE	FALSE	FALSE	TRUE	Boana calcarata (Troschel, 1848)	1848
Anura	Hylidae	Hylinae	Boana	cinerascens	Boana cinerascens			Hypsiboas cinerascens	Hypsiboas cinerascens, Hyla cinerascens	Hyla cinerascens	Least Concern (LC)	SR,GF,GY,BO,VE,PE,EC,CO,BR		Boana cinerascens	FALSE	FALSE	FALSE	FALSE	FALSE	FALSE	FALSE	FALSE	TRUE	FALSE	TRUE	Boana cinerascens (Spix, 1824)	1824
Anura	Hylidae	Hylinae	Boana	crepitans	Boana crepitans			Hypsiboas crepitans	Hypsiboas crepitans, Hyla crepitans	Hyla crepitans	Least Concern (LC)	BR,CO,GF,GY,PA,SR,TT,VE		Boana crepitans	TRUE	TRUE	TRUE	FALSE	FALSE	TRUE	FALSE	FALSE	TRUE	TRUE	TRUE	Boana crepitans (Wied-Neuwied, 1824)	1824
Anura	Hylidae	Hylinae	Boana	fasciata	Boana fasciata		Gunther's Banded Treefrog	Hypsiboas fasciatus	Hypsiboas fasciatus, Hyla fasciata, Hyla steinbachi	Hyla fasciata, Hyla steinbachi, Boana fasciata	Least Concern (LC)	BR,EC,PE,SR		Boana fasciata	TRUE	TRUE	TRUE	FALSE	FALSE	TRUE	FALSE	FALSE	TRUE	FALSE	TRUE	Boana fasciata (Günther, 1858)	1858
Anura	Hylidae	Hylinae	Boana	geographica	Boana geographica		Map Treefrog, Rana geogrÃÂ¡fica	Hypsiboas geographicus	Hypsiboas geographicus, Hyla geographica	Hyla geographica	Least Concern (LC)	BO,BR,CO,EC,GF,GY,PE,SR,TT,VE		Boana geographica	FALSE	FALSE	FALSE	FALSE	FALSE	FALSE	FALSE	FALSE	TRUE	FALSE	TRUE	Boana geographica (Spix, 1824)	1824
Anura	Hylidae	Hylinae	Boana	heilprini	Boana heilprini		Hispaniolan Green Treefrog	Hypsiboas heilprini	Hypsiboas heilprini, Hyla heilprini	Hyla heilprini	Vulnerable (VU)	DO		Boana heilprini	FALSE	FALSE	FALSE	FALSE	FALSE	FALSE	FALSE	FALSE	TRUE	FALSE	TRUE	Boana heilprini (Noble, 1923)	1923
Anura	Hylidae	Hylinae	Boana	lanciformis	Boana lanciformis		Rocket Treefrog, Basin Treefrog	Hypsiboas lanciformis	Hypsiboas lanciformis, Hyla lanciformis	Hyla lanciformis	Least Concern (LC)	PE,BO,CO,VE,EC,BR		Boana lanciformis	FALSE	FALSE	FALSE	FALSE	FALSE	FALSE	FALSE	FALSE	TRUE	FALSE	TRUE	Boana lanciformis (Cope, 1871)	1871
Anura	Hylidae	Hylinae	Boana	picturata	Boana picturata			Hypsiboas picturatus	Hypsiboas picturatus, Hyla picturata	Hyla picturata	Least Concern (LC)	EC,CO		Boana picturata	TRUE	TRUE	TRUE	FALSE	FALSE	TRUE	FALSE	FALSE	FALSE	FALSE	TRUE	Boana picturata (Boulenger, 1899)	1899
Anura	Hylidae	Hylinae	Boana	punctata	Boana punctata		Dotted Treefrog, Polka-dot Treefrog	Hypsiboas punctatus	Hypsiboas punctatus, Hyla punctata	Hyla punctata	Least Concern (LC)	AR,BO,BR,CO,EC,GF,GY,PY,PE,SR,TT,VE		Boana punctata	TRUE	TRUE	TRUE	FALSE	FALSE	TRUE	FALSE	FALSE	TRUE	TRUE	TRUE	Boana punctata (Schneider, 1799)	1799
Anura	Hylidae	Hylinae	Boana	raniceps	Boana raniceps			Hypsiboas raniceps	Hypsiboas raniceps, Hyla raniceps	Hyla raniceps	Least Concern (LC)	AR,BO,BR,GF,PY		Boana raniceps	FALSE	FALSE	FALSE	FALSE	FALSE	FALSE	FALSE	FALSE	TRUE	TRUE	TRUE	Boana raniceps (Cope, 1862)	1862
Anura	Hylidae	Hylinae	Boana	rosenbergi	Boana rosenbergi			Hypsiboas rosenbergi	Hypsiboas rosenbergi, Hyla rosenbergi	Hyla rosenbergi	Least Concern (LC)	CO,CR,EC,PA,VE		Boana rosenbergi	TRUE	FALSE	TRUE	FALSE	FALSE	TRUE	FALSE	FALSE	FALSE	FALSE	TRUE	Boana rosenbergi (Boulenger, 1898)	1898
Anura	Mantellidae	Mantellinae	Boehmantis	microtympanum	Boehmantis microtympanum			Boehmantis microtympanum	Mantidactylus microtympanum	Mantidactylus microtympanum	Vulnerable (VU)	MG		Boehmantis microtympanum	FALSE	FALSE	FALSE	FALSE	FALSE	FALSE	FALSE	FALSE	FALSE	TRUE	TRUE	Boehmantis microtympanum (Angel, 1935)	1935
Anura	Hylidae	Hylinae	Bokermannohyla	ibitiguara	Bokermannohyla ibitiguara			Bokermannohyla ibitiguara	Hyla ibitiguara	Hyla ibitiguara	Data Deficient (DD)	BR		Bokermannohyla ibitiguara	FALSE	FALSE	FALSE	TRUE	FALSE	TRUE	FALSE	FALSE	FALSE	FALSE	TRUE	Bokermannohyla ibitiguara (Cardoso, 1983)	1983
Anura	Hylidae	Hylinae	Bokermannohyla	sazimai	Bokermannohyla sazimai			Bokermannohyla sazimai	Hyla sazimai	Hyla sazimai	Data Deficient (DD)	BR		Bokermannohyla sazimai	FALSE	FALSE	FALSE	TRUE	FALSE	TRUE	FALSE	FALSE	FALSE	FALSE	TRUE	Bokermannohyla sazimai (Cardoso and Andrade, 1982)	1982
Caudata	Plethodontidae	Hemidactyliinae	Bolitoglossa	colonnea	Bolitoglossa colonnea	Eladinea	Ridge-headed Salamander	Bolitoglossa colonnea			Least Concern (LC)	PA,CR		Bolitoglossa colonnea	FALSE	FALSE	FALSE	TRUE	FALSE	TRUE	FALSE	FALSE	FALSE	FALSE	TRUE	Bolitoglossa colonnea (Dunn, 1924)	1924
Caudata	Plethodontidae	Hemidactyliinae	Bolitoglossa	dofleini	Bolitoglossa dofleini	Pachymandra	Giant Palm Salamander, Doflein's Salamander, Alto Verapaz Salamander	Bolitoglossa dofleini	Bolitoglossa schmidti, Oedipus schmidti	Bolitoglossa schmidti, Oedipus schmidti	Near Threatened (NT)	HN,GT		Bolitoglossa dofleini	TRUE	FALSE	TRUE	TRUE	FALSE	TRUE	FALSE	FALSE	FALSE	TRUE	TRUE	Bolitoglossa dofleini (Werner, 1903)	1903
Caudata	Plethodontidae	Hemidactyliinae	Bolitoglossa	mexicana	Bolitoglossa mexicana	Bolitoglossa	Mexican Mushroom tongue Salamander, Mexican Mushroom-Tonged Salamander, Galliwasp, Black-and-Gold Salamander, Mexican Climbing Salamander, Spanish - Salamanquesa	Bolitoglossa mexicana			Least Concern (LC)	BZ,SV,GT,HN,MX		Bolitoglossa mexicana	FALSE	FALSE	FALSE	TRUE	FALSE	TRUE	FALSE	FALSE	FALSE	TRUE	TRUE	Bolitoglossa mexicana Duméril, Bibron, and Duméril, 1854	1854
Caudata	Plethodontidae	Hemidactyliinae	Bolitoglossa	pesrubra	Bolitoglossa pesrubra	Eladinea		Bolitoglossa pesrubra			Vulnerable (VU)	CR		Bolitoglossa pesrubra	FALSE	FALSE	FALSE	FALSE	FALSE	FALSE	FALSE	FALSE	FALSE	TRUE	TRUE	Bolitoglossa pesrubra (Taylor, 1952)	1952
Caudata	Plethodontidae	Hemidactyliinae	Bolitoglossa	schizodactyla	Bolitoglossa schizodactyla	Eladinea		Bolitoglossa schizodactyla			Least Concern (LC)	CR,PA		Bolitoglossa schizodactyla	FALSE	FALSE	FALSE	TRUE	FALSE	TRUE	FALSE	FALSE	FALSE	FALSE	TRUE	Bolitoglossa schizodactyla Wake and Brame, 1966	1966
Anura	Bombinatoridae		Bombina	bombina	Bombina bombina		Fire-Bellied Toad	Bombina bombina			Least Concern (LC)	AT,BY,BA,BG,HR,CZ,DK,DE,GR,HU,KZ,LV,LT,MD,PL,RO,RU,RS,SK,SI,SE,TR,UA		Bombina bombina	TRUE	TRUE	TRUE	TRUE	FALSE	TRUE	FALSE	FALSE	TRUE	TRUE	TRUE	Bombina bombina (Linnaeus, 1761)	1761
Anura	Bombinatoridae		Bombina	lichuanensis	Bombina lichuanensis		Lichuan Bell Toad	Bombina lichuanensis			Vulnerable (VU)	CN		Bombina lichuanensis	FALSE	FALSE	FALSE	FALSE	FALSE	FALSE	FALSE	FALSE	TRUE	FALSE	TRUE	Bombina microdeladigitora Liu, Hu, and Yang, 1960	1960
Anura	Bombinatoridae		Bombina	maxima	Bombina maxima		Large-webbed Bell Toad		Bombinator maximus	Bombinator maximus	NA	CN		Bombina maxima	TRUE	TRUE	TRUE	TRUE	FALSE	TRUE	FALSE	FALSE	TRUE	FALSE	TRUE	Bombina maxima (Boulenger, 1905)	1905
Anura	Bombinatoridae		Bombina	microdeladigitora	Bombina microdeladigitora		Small-webbed Bell Toad, Hubei Fire Bellied Toad or Yunnan Fire Bellied Toad		Bombinator maximus	Bombinator maximus	NA	CN,VN		Bombina microdeladigitora	TRUE	TRUE	TRUE	FALSE	FALSE	TRUE	FALSE	FALSE	FALSE	FALSE	TRUE	Bombina microdeladigitora Liu, Hu, and Yang, 1960	1960
Anura	Bombinatoridae		Bombina	orientalis	Bombina orientalis		Oriental Fire-Bellied Toad	Bombina orientalis			Least Concern (LC)	RU,KR,KP,CN		Bombina orientalis	TRUE	TRUE	TRUE	TRUE	FALSE	TRUE	FALSE	FALSE	TRUE	TRUE	TRUE	Bombina orientalis (Boulenger, 1890)	1890
Anura	Bombinatoridae		Bombina	pachypus	Bombina pachypus		Apennine Yellow-bellied Toad	Bombina pachypus			Endangered (EN)	IT		Bombina pachypus	TRUE	TRUE	TRUE	FALSE	FALSE	TRUE	FALSE	FALSE	FALSE	FALSE	TRUE	Bombina pachypus (Bonaparte, 1838)	1838
Anura	Bombinatoridae		Bombina	variegata	Bombina variegata		Yellow-Bellied Toad	Bombina variegata			Least Concern (LC)	AT,BE,BG,CZ,FR,DE,GR,HU,IT,LI,LU,MK,MD,ME,NL,PL,RO,RS,SK,SI,CH,UA		Bombina variegata	TRUE	TRUE	TRUE	TRUE	FALSE	TRUE	FALSE	FALSE	TRUE	TRUE	TRUE	Bombina variegata (Linnaeus, 1758)	1758
Anura	Mantellidae	Boophinae	Boophis	albilabris	Boophis albilabris	Boophis		Boophis albilabris			Least Concern (LC)	MG		Boophis albilabris	TRUE	TRUE	TRUE	TRUE	FALSE	TRUE	FALSE	FALSE	TRUE	TRUE	TRUE	Boophis albilabris (Boulenger, 1888)	1888
Anura	Mantellidae	Boophinae	Boophis	albipunctatus	Boophis albipunctatus	Boophis		Boophis albipunctatus			Least Concern (LC)	MG		Boophis albipunctatus	FALSE	FALSE	FALSE	TRUE	FALSE	TRUE	FALSE	FALSE	TRUE	FALSE	TRUE	Boophis albipunctatus Glaw and Thiesmeier, 1993	1993
Anura	Mantellidae	Boophinae	Boophis	ankaratra	Boophis ankaratra	Boophis		Boophis ankaratra			Least Concern (LC)	MG		Boophis ankaratra	TRUE	FALSE	TRUE	FALSE	FALSE	TRUE	FALSE	FALSE	FALSE	FALSE	TRUE	Boophis ankaratra Andreone, 1993	1993
Anura	Mantellidae	Boophinae	Boophis	boehmei	Boophis boehmei	Boophis		Boophis boehmei			Endangered (EN)	MG		Boophis boehmei	FALSE	FALSE	FALSE	FALSE	FALSE	FALSE	FALSE	FALSE	TRUE	FALSE	TRUE	Boophis boehmei Glaw and Vences, 1992	1992
Anura	Mantellidae	Boophinae	Boophis	elenae	Boophis elenae	Boophis		Boophis elenae			Near Threatened (NT)	MG		Boophis elenae	FALSE	FALSE	FALSE	TRUE	FALSE	TRUE	FALSE	FALSE	TRUE	FALSE	TRUE	Boophis elenae Andreone, 1993	1993
Anura	Mantellidae	Boophinae	Boophis	erythrodactylus	Boophis erythrodactylus	Boophis		Boophis erythrodactylus			Least Concern (LC)	MG		Boophis erythrodactylus	TRUE	FALSE	TRUE	TRUE	FALSE	TRUE	FALSE	FALSE	TRUE	FALSE	TRUE	Boophis erythrodactylus (Guibé, 1953)	1953
Anura	Mantellidae	Boophinae	Boophis	goudotii	Boophis goudotii	Boophis		Boophis goudotii			Least Concern (LC)	MG		Boophis goudotii	FALSE	FALSE	FALSE	FALSE	FALSE	FALSE	FALSE	FALSE	FALSE	TRUE	TRUE	Boophis goudotii Tschudi, 1838	1838
Anura	Mantellidae	Boophinae	Boophis	luteus	Boophis luteus	Boophis		Boophis luteus			Least Concern (LC)	MG		Boophis luteus	TRUE	TRUE	TRUE	TRUE	FALSE	TRUE	FALSE	FALSE	TRUE	FALSE	TRUE	Boophis luteus (Boulenger, 1882)	1882
Anura	Mantellidae	Boophinae	Boophis	madagascariensis	Boophis madagascariensis	Boophis		Boophis madagascariensis			Least Concern (LC)	MG		Boophis madagascariensis	FALSE	FALSE	FALSE	TRUE	FALSE	TRUE	FALSE	FALSE	TRUE	TRUE	TRUE	Boophis madagascariensis (Peters, 1874)	1874
Anura	Mantellidae	Boophinae	Boophis	marojezensis	Boophis marojezensis	Boophis		Boophis marojezensis			Least Concern (LC)	MG		Boophis marojezensis	FALSE	FALSE	FALSE	FALSE	FALSE	FALSE	FALSE	FALSE	TRUE	FALSE	TRUE	Boophis marojezensis Glaw and Vences, 1994	1994
Anura	Mantellidae	Boophinae	Boophis	microtympanum	Boophis microtympanum	Boophis		Boophis microtympanum			Least Concern (LC)	MG		Boophis microtympanum	TRUE	TRUE	TRUE	TRUE	FALSE	TRUE	FALSE	FALSE	TRUE	TRUE	TRUE	Boophis microtympanum (Boettger, 1881)	1881
Anura	Mantellidae	Boophinae	Boophis	rappiodes	Boophis rappiodes	Boophis		Boophis rappiodes			Least Concern (LC)	MG		Boophis rappiodes	TRUE	TRUE	TRUE	FALSE	FALSE	TRUE	FALSE	FALSE	FALSE	FALSE	TRUE	Boophis rappiodes (Ahl, 1928)	1928
Anura	Mantellidae	Boophinae	Boophis	tephraeomystax	Boophis tephraeomystax	Sahona		Boophis tephraeomystax			Least Concern (LC)	MG		Boophis tephraeomystax	FALSE	FALSE	FALSE	FALSE	FALSE	FALSE	FALSE	FALSE	TRUE	FALSE	TRUE	Boophis tephraeomystax (Duméril, 1853)	1853
Anura	Mantellidae	Boophinae	Boophis	viridis	Boophis viridis	Boophis		Boophis viridis			Least Concern (LC)	MG		Boophis viridis	TRUE	TRUE	TRUE	FALSE	FALSE	TRUE	FALSE	FALSE	TRUE	FALSE	TRUE	Boophis viridis Blommers-Schlösser, 1979	1979
Gymnophiona	Herpelidae		Boulengerula	taitana	Boulengerula taitana		ming'ori	Boulengerula taitana			Endangered (EN)	KE		Boulengerula taitana	FALSE	FALSE	FALSE	FALSE	FALSE	FALSE	FALSE	FALSE	FALSE	TRUE	TRUE	Boulengerula taitana Loveridge, 1935	1935
Anura	Brachycephalidae		Brachycephalus	ephippium	Brachycephalus ephippium		Pumpkin Toadlet, Spix's Saddleback Toad, Botao de Ouro, Sapinho Dourado	Brachycephalus ephippium			Least Concern (LC)	BR		Brachycephalus ephippium	FALSE	FALSE	FALSE	TRUE	FALSE	TRUE	FALSE	FALSE	FALSE	FALSE	TRUE	Brachycephalus ephippium (Spix, 1824)	1824
Anura	Megophryidae	Megophryinae	Brachytarsophrys	carinense	Brachytarsophrys carinense		Broad-Headed Short-Legged Toad (in English) / Kuan Tou Duan Tui Chan Ã¥Â®Â½Ã¥Â¤Â´Ã§Å¸Â­Ã¨â¦Â¿Ã¨Å¸Â¾	Megophrys carinense	Megophrys carinense, Brachytarsophrys carinensis	Brachytarsophrys carinensis	Least Concern (LC)	MM,TH		Brachytarsophrys carinense	FALSE	FALSE	FALSE	FALSE	FALSE	FALSE	FALSE	FALSE	TRUE	FALSE	TRUE	Megophrys carinense (Boulenger, 1889)	1889
Anura	Megophryidae	Megophryinae	Brachytarsophrys	chuannanensis	Brachytarsophrys chuannanensis		Southern Sichuan Short-Legged Toad (in English), Chuan Nan Duan Tui Chan Ã¥Â·ÂÃ¥ÂâÃ§Å¸Â­Ã¨â¦Â¿Ã¨Å¸Â¾	Megophrys chuannanensis	Megophrys chuannanensis		Data Deficient (DD)	CN		Brachytarsophrys chuannanensis	FALSE	FALSE	FALSE	FALSE	FALSE	FALSE	FALSE	FALSE	FALSE	TRUE	TRUE	Megophrys chuannanensis (Fei, Ye, and Huang, 2001)	2001
Anura	Megophryidae	Megophryinae	Brachytarsophrys	feae	Brachytarsophrys feae		Fea Ã¢â¬â¢s Short-Legged Toad (in English), Fei Shi Duan Tui Chan (Ã¨Â´Â¹Ã¦Â°ÂÃ§Å¸Â­Ã¨â¦Â¿Ã¨Å¸Â¾ in Chinese).	Megophrys feae	Megophrys feae		Least Concern (LC)	CN,MM		Brachytarsophrys feae	FALSE	FALSE	FALSE	FALSE	FALSE	FALSE	FALSE	FALSE	FALSE	TRUE	TRUE	Megophrys feae Boulenger, 1887	1887
Anura	Megophryidae	Megophryinae	Brachytarsophrys	intermedia	Brachytarsophrys intermedia		Annam Short-Legged Toad (in English) / Yue Nan Duan Tui Chan Ã¨Â¶Å Ã¥ÂâÃ§Å¸Â­Ã¨â¦Â¿Ã¨Å¸Â¾	Megophrys intermedia	Megophrys intermedia		Least Concern (LC)	LA,VN		Brachytarsophrys intermedia	FALSE	FALSE	FALSE	FALSE	FALSE	FALSE	FALSE	FALSE	FALSE	TRUE	TRUE	Megophrys intermedia Smith, 1921	1921
Anura	Brevicipitidae		Breviceps	adspersus	Breviceps adspersus		Common rain frog	Breviceps adspersus			Least Concern (LC)	AO,BW,MZ,NA,ZA,SZ,ZM,ZW		Breviceps adspersus	TRUE	FALSE	TRUE	TRUE	FALSE	TRUE	FALSE	FALSE	TRUE	FALSE	TRUE	Breviceps adspersus Peters, 1882	1882
Anura	Brevicipitidae		Breviceps	fuscus	Breviceps fuscus		Black rain frog	Breviceps fuscus			Least Concern (LC)	ZA		Breviceps fuscus	TRUE	FALSE	TRUE	FALSE	FALSE	TRUE	FALSE	FALSE	FALSE	FALSE	TRUE	Breviceps fuscus Hewitt, 1925	1925
Anura	Brevicipitidae		Breviceps	mossambicus	Breviceps mossambicus		Mozambique rain frog	Breviceps mossambicus			Least Concern (LC)	BW,CD,MW,MZ,ZA,SZ,TZ,ZM,ZW		Breviceps mossambicus	TRUE	TRUE	TRUE	FALSE	FALSE	TRUE	FALSE	FALSE	TRUE	FALSE	TRUE	Breviceps mossambicus Peters, 1854	1854
Anura	Strabomantidae	Holoadeninae	Bryophryne	cophites	Bryophryne cophites		Cusco Andes Frog	Bryophryne cophites	Phrynopus cophites	Phrynopus cophites	Endangered (EN)	PE		Bryophryne cophites	FALSE	FALSE	FALSE	TRUE	FALSE	TRUE	FALSE	FALSE	FALSE	FALSE	TRUE	Bryophryne cophites (Lynch, 1975)	1975
Anura	Strabomantidae	Holoadeninae	Bryophryne	hanssaueri	Bryophryne hanssaueri			Bryophryne hanssaueri			Least Concern (LC)	PE		Bryophryne hanssaueri	FALSE	FALSE	FALSE	TRUE	FALSE	TRUE	FALSE	FALSE	FALSE	FALSE	TRUE	Bryophryne hanssaueri Lehr and Catenazzi, 2009	2009
Anura	Strabomantidae	Holoadeninae	Bryophryne	nubilosus	Bryophryne nubilosus			Bryophryne nubilosus			Least Concern (LC)	PE		Bryophryne nubilosus	FALSE	FALSE	FALSE	TRUE	FALSE	TRUE	FALSE	FALSE	FALSE	FALSE	TRUE	Bryophryne nubilosus Lehr and Catenazzi, 2008	2008
Anura	Rhacophoridae	Buergeriinae	Buergeria	oxycephala	Buergeria oxycephala			Buergeria oxycephala	Buergeria oxycephalus	Buergeria oxycephalus	Vulnerable (VU)	CN		Buergeria oxycephala	FALSE	FALSE	FALSE	FALSE	FALSE	FALSE	FALSE	FALSE	FALSE	TRUE	TRUE	Buergeria oxycephala (Boulenger, 1900 "1899")	1899
Anura	Rhacophoridae	Buergeriinae	Buergeria	robusta	Buergeria robusta			Buergeria robusta			Least Concern (LC)	TW		Buergeria robusta	FALSE	FALSE	FALSE	FALSE	FALSE	FALSE	FALSE	FALSE	FALSE	TRUE	TRUE	Buergeria robusta (Boulenger, 1909)	1909
Anura	Bufonidae		Bufo	bankorensis	Bufo bankorensis		Taiwan Common Toad	Bufo bankorensis			Least Concern (LC)	TW		Bufo bankorensis	FALSE	FALSE	FALSE	TRUE	FALSE	TRUE	FALSE	FALSE	FALSE	TRUE	TRUE	Bufo bankorensis Barbour, 1908	1908
Anura	Bufonidae		Bufo	bufo	Bufo bufo		Common Toad	Bufo bufo			Least Concern (LC)	AL,AT,BY,BE,BA,BG,HR,CZ,DK,EE,FI,FR,DE,GI,GR,HU,IT,KZ,LV,LI,LT,LU,MK,MD,ME,NL,NO,PL,RO,RU,RS,SK,SI,SE,CH,TR,UA,GB		Bufo bufo	TRUE	TRUE	TRUE	FALSE	FALSE	TRUE	FALSE	FALSE	TRUE	TRUE	TRUE	Bufo bufo (Linnaeus, 1758)	1758
Anura	Bufonidae		Bufo	gargarizans	Bufo gargarizans		Asiatic Toad	Bufo gargarizans	Bufo minshanicus, Bufo wolongensis, Bufo kabischi, Bufo tibetanus, Bufo andrewsi	Bufo andrewsi	Least Concern (LC)	RU,KR,KP,JP,CN		Bufo gargarizans	TRUE	TRUE	TRUE	TRUE	FALSE	TRUE	FALSE	FALSE	TRUE	TRUE	TRUE	Bufo gargarizans Cantor, 1842	1842
Anura	Bufonidae		Bufo	japonicus	Bufo japonicus		Japanese Common Toad, Nihon-hikigaeru, Azuma-hikigaeru	Bufo japonicus			Least Concern (LC)	JP		Bufo japonicus	TRUE	TRUE	TRUE	FALSE	FALSE	TRUE	FALSE	FALSE	TRUE	FALSE	TRUE	Bufo japonicus Temminck and Schlegel, 1838	1838
Anura	Bufonidae		Bufo	torrenticola	Bufo torrenticola		Japanese Stream Toad	Bufo torrenticola			Least Concern (LC)	JP		Bufo torrenticola	TRUE	TRUE	TRUE	FALSE	FALSE	TRUE	FALSE	FALSE	TRUE	FALSE	TRUE	Bufo torrenticola Matsui, 1976	1976
Anura	Bufonidae		Bufotes	boulengeri	Bufotes boulengeri		Sicilian Green Toad, Rospo smeraldino siciliano, Sizilianische WechselkrÃÂ¶te, crapaud vert de Sicile, Sapo verde siciliano	Bufotes boulengeri	Bufo boulengeri, Bufotes siculus		Least Concern (LC)	DZ,EG,IT,LY,MA,TN	The toads discovered on Sicily and a few additional Mediterranean islands and assigned to <i>Bufotes siculus</i> were reduced to a subspecies of the otherwise exclusively African <i>Bufotes boulengeri</i> by Dufresnes, Mazepa, Jablonski, Oliveira, We	Bufotes boulengeri	TRUE	TRUE	TRUE	FALSE	FALSE	TRUE	FALSE	FALSE	FALSE	FALSE	TRUE	Bufotes boulengeri (Lataste, 1879)	1879
Anura	Bufonidae		Bufotes	luristanicus	Bufotes luristanicus			Bufotes luristanicus	Bufo luristanicus	Bufo luristanicus	Least Concern (LC)	IR		Bufotes luristanicus	TRUE	FALSE	TRUE	FALSE	FALSE	TRUE	FALSE	FALSE	FALSE	FALSE	TRUE	Bufotes luristanicus (Schmidt, 1952)	1952
Anura	Bufonidae		Bufotes	pewzowi	Bufotes pewzowi			Bufotes pewzowi	Bufo taxkorensis, Bufo pewzowi	Bufo pewzowi	Least Concern (LC)	CN,KZ,KG,MN,TJ,UZ	This tetraploid species is thought to have originated by hybridization of diploid B. latastii with diploid B. turanensis (see several publications by Stoeck and coauthors: Evolution 2006 Mol Phyl Evo, 2010 Evol, 2012 PRSB, 2015 Heredity, 2015 J Biog.	Bufotes pewzowi	TRUE	FALSE	TRUE	FALSE	FALSE	TRUE	FALSE	FALSE	FALSE	TRUE	TRUE	Bufotes pewzowi (Bedriaga, 1898)	1898
Anura	Bufonidae		Bufotes	viridis	Bufotes viridis		Green Toad	Bufotes viridis	Pseudepidalea viridis, Bufotes variabilis, Bufo viridis	Bufo viridis	Least Concern (LC)	AL,AT,BY,BA,BG,HR,CZ,EE,FR,DE,GR,HU,IT,KZ,LV,LT,MD,ME,PL,RO,RU,RS,SK,SI,ES,CH,UA		Bufotes viridis	TRUE	TRUE	TRUE	FALSE	FALSE	TRUE	FALSE	FALSE	TRUE	FALSE	TRUE	Bufotes viridis (Laurenti, 1768)	1768
Gymnophiona	Caeciliidae		Caecilia	thompsoni	Caecilia thompsoni		Thompson's Caecilian	Caecilia thompsoni			Data Deficient (DD)	CO		Caecilia thompsoni	FALSE	TRUE	TRUE	FALSE	FALSE	TRUE	FALSE	FALSE	FALSE	FALSE	TRUE	Caecilia thompsoni Boulenger, 1902	1902
Gymnophiona	Caeciliidae		Caecilia	volcani	Caecilia volcani			Caecilia volcani			Data Deficient (DD)	PA		Caecilia volcani	FALSE	FALSE	FALSE	TRUE	FALSE	TRUE	FALSE	FALSE	FALSE	FALSE	TRUE	Caecilia volcani Taylor, 1969	1969
Anura	Microhylidae	Asterophryinae	Callulops	doriae	Callulops doriae			Callulops doriae			Least Concern (LC)	PG		Callulops doriae	FALSE	FALSE	FALSE	TRUE	FALSE	TRUE	FALSE	FALSE	FALSE	FALSE	TRUE	Callulops doriae Boulenger, 1888	1888
Anura	Microhylidae	Asterophryinae	Callulops	stictogaster	Callulops stictogaster			Callulops stictogaster			Least Concern (LC)	PG		Callulops stictogaster	FALSE	FALSE	FALSE	FALSE	FALSE	FALSE	FALSE	FALSE	FALSE	TRUE	TRUE	Callulops stictogaster (Zweifel, 1972)	1972
Caudata	Salamandridae	Pleurodelinae	Calotriton	asper	Calotriton asper		Pyrenean brook salamander, Pyrenean mountain newt, PyrenÃÂ¤en-Gebirgsmolch, TritÃÂ³ pirinenc, PyrenÃÂ¦sk bjergsalamander, PÃÂ¼renee mÃÂ¤givesilik, TritÃÂ³n pirenaico, Euprocte des PyrÃÂ©nÃÂ©es, Euprotte pirenaico,	Calotriton asper	Euproctus asper, Hemitriton asper	Euproctus asper, Hemitriton asper	Near Threatened (NT)	ES,FR,AD		Calotriton asper	FALSE	TRUE	TRUE	FALSE	FALSE	TRUE	FALSE	FALSE	FALSE	FALSE	TRUE	Calotriton asper (Dugès, 1852)	1852
Anura	Calyptocephalellidae		Calyptocephalella	gayi	Calyptocephalella gayi		Helmeted Water Toad, Chilean Giant Frog	Calyptocephalella gayi	Calyptocephalus gayi, Caudiverbera caudiverbera		Vulnerable (VU)	CL		Calyptocephalella gayi	FALSE	TRUE	TRUE	TRUE	TRUE	TRUE	TRUE	III	TRUE	TRUE	TRUE	Calyptocephalella gayi (Duméril and Bibron, 1841)	1841
Anura	Arthroleptidae		Cardioglossa	elegans	Cardioglossa elegans			Cardioglossa elegans			Least Concern (LC)	CM		Cardioglossa elegans	FALSE	FALSE	FALSE	TRUE	FALSE	TRUE	FALSE	FALSE	FALSE	FALSE	TRUE	Cardioglossa elegans Boulenger, 1906	1906
Anura	Arthroleptidae		Cardioglossa	gracilis	Cardioglossa gracilis			Cardioglossa gracilis			Least Concern (LC)	CM,CF,CD,GQ,GA,NG		Cardioglossa gracilis	FALSE	FALSE	FALSE	TRUE	FALSE	TRUE	FALSE	FALSE	FALSE	FALSE	TRUE	Cardioglossa gracilis Boulenger, 1900	1900
Anura	Arthroleptidae		Cardioglossa	gratiosa	Cardioglossa gratiosa			Cardioglossa gratiosa			Least Concern (LC)	CM,GA		Cardioglossa gratiosa	FALSE	FALSE	FALSE	TRUE	FALSE	TRUE	FALSE	FALSE	FALSE	FALSE	TRUE	Cardioglossa gratiosa Amiet, 1972	1972
Anura	Arthroleptidae		Cardioglossa	leucomystax	Cardioglossa leucomystax			Cardioglossa leucomystax			Least Concern (LC)	CM,CG,CD,CI,GQ,GA,GH,GN,LR,NG		Cardioglossa leucomystax	FALSE	FALSE	FALSE	TRUE	FALSE	TRUE	FALSE	FALSE	FALSE	FALSE	TRUE	Cardioglossa leucomystax (Boulenger, 1903)	1903
Anura	Arthroleptidae		Cardioglossa	melanogaster	Cardioglossa melanogaster			Cardioglossa melanogaster			Vulnerable (VU)	CM,NG		Cardioglossa melanogaster	FALSE	FALSE	FALSE	TRUE	FALSE	TRUE	FALSE	FALSE	FALSE	FALSE	TRUE	Cardioglossa melanogaster Amiet, 1972	1972
Anura	Arthroleptidae		Cardioglossa	nigromaculata	Cardioglossa nigromaculata			Cardioglossa nigromaculata			Least Concern (LC)	CM,NG		Cardioglossa nigromaculata	FALSE	FALSE	FALSE	TRUE	FALSE	TRUE	FALSE	FALSE	FALSE	FALSE	TRUE	Cardioglossa nigromaculata Nieden, 1908	1908
Anura	Arthroleptidae		Cardioglossa	oreas	Cardioglossa oreas			Cardioglossa oreas			Endangered (EN)	CM		Cardioglossa oreas	FALSE	FALSE	FALSE	TRUE	FALSE	TRUE	FALSE	FALSE	FALSE	FALSE	TRUE	Cardioglossa oreas Amiet, 1972	1972
Anura	Arthroleptidae		Cardioglossa	pulchra	Cardioglossa pulchra			Cardioglossa pulchra			Endangered (EN)	CM,NG		Cardioglossa pulchra	FALSE	FALSE	FALSE	TRUE	FALSE	TRUE	FALSE	FALSE	FALSE	FALSE	TRUE	Cardioglossa pulchra Schiøtz, 1963	1963
Anura	Arthroleptidae		Cardioglossa	schioetzi	Cardioglossa schioetzi			Cardioglossa schioetzi			Vulnerable (VU)	NG,CM		Cardioglossa schioetzi	FALSE	FALSE	FALSE	TRUE	FALSE	TRUE	FALSE	FALSE	FALSE	FALSE	TRUE	Cardioglossa schioetzi Amiet, 1982	1982
Anura	Arthroleptidae		Cardioglossa	trifasciata	Cardioglossa trifasciata			Cardioglossa trifasciata			Critically Endangered (CR)	CM		Cardioglossa trifasciata	FALSE	FALSE	FALSE	TRUE	FALSE	TRUE	FALSE	FALSE	FALSE	FALSE	TRUE	Cardioglossa trifasciata Amiet, 1972	1972
Anura	Arthroleptidae		Cardioglossa	venusta	Cardioglossa venusta			Cardioglossa venusta			Endangered (EN)	CM		Cardioglossa venusta	FALSE	FALSE	FALSE	TRUE	FALSE	TRUE	FALSE	FALSE	FALSE	FALSE	TRUE	Cardioglossa venusta Amiet, 1972	1972
Anura	Ceratophryidae		Ceratophrys	aurita	Ceratophrys aurita			Ceratophrys aurita	Ceratophrys varia	Ceratophrys varia	Least Concern (LC)	BR		Ceratophrys aurita	TRUE	TRUE	TRUE	TRUE	FALSE	TRUE	FALSE	FALSE	TRUE	TRUE	TRUE	Ceratophrys aurita (Raddi, 1823)	1823
Anura	Ceratophryidae		Ceratophrys	calcarata	Ceratophrys calcarata		Venezuelan Horned Frog, Colombian Horned Frog	Ceratophrys calcarata			Least Concern (LC)	VE,CO		Ceratophrys calcarata	TRUE	FALSE	TRUE	TRUE	FALSE	TRUE	FALSE	FALSE	TRUE	TRUE	TRUE	Ceratophrys calcarata Boulenger, 1890	1890
Anura	Ceratophryidae		Ceratophrys	cornuta	Ceratophrys cornuta		Surinam Horned Frog	Ceratophrys cornuta			Least Concern (LC)	GF,SR,BO,PE,EC,CO,BR,VE		Ceratophrys cornuta	TRUE	TRUE	TRUE	TRUE	FALSE	TRUE	FALSE	FALSE	TRUE	FALSE	TRUE	Ceratophrys cornuta (Linnaeus, 1758)	1758
Anura	Ceratophryidae		Ceratophrys	cranwelli	Ceratophrys cranwelli			Ceratophrys cranwelli			Least Concern (LC)	PY,BR,BO,AR		Ceratophrys cranwelli	TRUE	TRUE	TRUE	TRUE	FALSE	TRUE	FALSE	FALSE	TRUE	TRUE	TRUE	Ceratophrys cranwelli Barrio, 1980	1980
Anura	Ceratophryidae		Ceratophrys	joazeirensis	Ceratophrys joazeirensis			Ceratophrys joazeirensis			Data Deficient (DD)	BR		Ceratophrys joazeirensis	TRUE	TRUE	TRUE	FALSE	FALSE	TRUE	FALSE	FALSE	FALSE	TRUE	TRUE	Ceratophrys joazeirensis Mercadal de Barrio, 1986	1986
Anura	Ceratophryidae		Ceratophrys	ornata	Ceratophrys ornata		Bell's Horned Frog, Escuerzo	Ceratophrys ornata			Near Threatened (NT)	AR,BR,UY		Ceratophrys ornata	TRUE	TRUE	TRUE	TRUE	FALSE	TRUE	FALSE	FALSE	TRUE	TRUE	TRUE	Ceratophrys ornata (Bell, 1843)	1843
Anura	Ceratophryidae		Ceratophrys	stolzmanni	Ceratophrys stolzmanni			Ceratophrys stolzmanni			Vulnerable (VU)	PE,EC		Ceratophrys stolzmanni	TRUE	TRUE	TRUE	FALSE	FALSE	TRUE	FALSE	FALSE	FALSE	TRUE	TRUE	Ceratophrys stolzmanni Steindachner, 1882	1882
Anura	Ceratophryidae		Chacophrys	pierottii	Chacophrys pierottii			Chacophrys pierottii			Least Concern (LC)	AR,BO		Chacophrys pierottii	TRUE	FALSE	TRUE	FALSE	FALSE	TRUE	FALSE	FALSE	TRUE	TRUE	TRUE	Chacophrys pierottii (Vellard, 1948)	1948
Anura	Hylidae	Hylinae	Charadrahyla	chaneque	Charadrahyla chaneque			Charadrahyla chaneque	Hyla chaneque	Hyla chaneque	Endangered (EN)	MX		Charadrahyla chaneque	FALSE	TRUE	TRUE	FALSE	FALSE	TRUE	FALSE	FALSE	FALSE	FALSE	TRUE	Charadrahyla chaneque (Duellman, 1961)	1961
Anura	Hylidae	Hylinae	Charadrahyla	taeniopus	Charadrahyla taeniopus		Porthole Treefrog, Calate	Charadrahyla taeniopus	Hyla taeniopus	Hyla taeniopus	Vulnerable (VU)	MX		Charadrahyla taeniopus	FALSE	FALSE	FALSE	FALSE	FALSE	FALSE	FALSE	FALSE	FALSE	TRUE	TRUE	Charadrahyla taeniopus (Günther, 1901)	1901
Anura	Microhylidae	Gastrophryninae	Chiasmocleis	bassleri	Chiasmocleis bassleri			Chiasmocleis bassleri			Least Concern (LC)	BR,CO,EC,PE		Chiasmocleis bassleri	FALSE	FALSE	FALSE	TRUE	FALSE	TRUE	FALSE	FALSE	FALSE	FALSE	TRUE	Chiasmocleis bassleri Dunn, 1949	1949
Anura	Microhylidae	Gastrophryninae	Chiasmocleis	hudsoni	Chiasmocleis hudsoni			Chiasmocleis hudsoni	Chiasmocleis jimi		Least Concern (LC)	BR,GF,GY,SR,VE		Chiasmocleis hudsoni	FALSE	FALSE	FALSE	TRUE	FALSE	TRUE	FALSE	FALSE	FALSE	FALSE	TRUE	Chiasmocleis hudsoni Parker, 1940	1940
Caudata	Salamandridae	Salamandrinae	Chioglossa	lusitanica	Chioglossa lusitanica		Gold-striped salamander, goldstreifensalamander, salamandra rabilarga, salamandra portuguesa, salamÃ ndria, gulstribet salamander, kuldtriip- salamander, arrubi, chioglosse portugais, pinchorra de rabolarga, chioglossa, aranycsikos szalamandra, ibÃ	Chioglossa lusitanica			Vulnerable (VU)	ES,PT		Chioglossa lusitanica	FALSE	TRUE	TRUE	TRUE	FALSE	TRUE	FALSE	FALSE	FALSE	FALSE	TRUE	Chioglossa lusitanica Bocage, 1864	1864
Anura	Rhacophoridae	Rhacophorinae	Chiromantis	nongkhorensis	Chiromantis nongkhorensis			Chiromantis nongkhorensis	Chirixalus nongkhorensis	Chirixalus nongkhorensis	Least Concern (LC)	KH,LA,MY,MM,TH,VN		Chiromantis nongkhorensis	FALSE	FALSE	FALSE	TRUE	FALSE	TRUE	FALSE	FALSE	FALSE	FALSE	TRUE	Chirixalus nongkhorensis (Cochran, 1927)	1927
Anura	Rhacophoridae	Rhacophorinae	Chiromantis	petersii	Chiromantis petersii			Chiromantis petersii			Least Concern (LC)	KE,SO,TZ		Chiromantis petersii	FALSE	FALSE	FALSE	TRUE	FALSE	TRUE	FALSE	FALSE	TRUE	TRUE	TRUE	Chiromantis petersii Boulenger, 1882	1882
Anura	Rhacophoridae	Rhacophorinae	Chiromantis	rufescens	Chiromantis rufescens			Chiromantis rufescens			Least Concern (LC)	CM,CF,CG,CD,CI,GA,GH,GN,NG,SL,UG		Chiromantis rufescens	FALSE	FALSE	FALSE	TRUE	FALSE	TRUE	FALSE	FALSE	TRUE	FALSE	TRUE	Chiromantis rufescens (Günther, 1869)	1869
Anura	Rhacophoridae	Rhacophorinae	Chiromantis	xerampelina	Chiromantis xerampelina		Gray Tree Frog	Chiromantis xerampelina			Least Concern (LC)	AO,BW,KE,MW,MZ,NA,ZA,SZ,TZ,ZM,ZW		Chiromantis xerampelina	TRUE	FALSE	TRUE	FALSE	FALSE	TRUE	FALSE	FALSE	TRUE	TRUE	TRUE	Chiromantis xerampelina Peters, 1854	1854
Anura	Microhylidae	Asterophryinae	Choerophryne	rostellifer	Choerophryne rostellifer			Choerophryne rostellifer			Least Concern (LC)	PG,ID		Choerophryne rostellifer	FALSE	FALSE	FALSE	TRUE	FALSE	TRUE	FALSE	FALSE	FALSE	FALSE	TRUE	Choerophryne rostellifer (Wandolleck, 1911)	1911
Anura	Dicroglossidae	Dicroglossinae	Chrysopaa	sternosignata	Chrysopaa sternosignata		Karez frog	Chrysopaa sternosignata	Paa sternosignata, Rana sternosignata, Nanorana sternosignata	Paa sternosignata, Rana sternosignata, Nanorana sternosignata	Least Concern (LC)	AF,IN,PK		Chrysopaa sternosignata	FALSE	FALSE	FALSE	FALSE	FALSE	FALSE	FALSE	FALSE	TRUE	FALSE	TRUE	Chrysopaa sternosignata (Murray, 1885)	1885
Anura	Ranidae		Clinotarsus	alticola	Clinotarsus alticola			Clinotarsus alticola	Rana alticola	Rana alticola	Least Concern (LC)	BT,IN,MM		Clinotarsus alticola	FALSE	FALSE	FALSE	TRUE	FALSE	TRUE	FALSE	FALSE	FALSE	TRUE	TRUE	Clinotarsus alticola (Boulenger, 1882)	1882
Anura	Centrolenidae	Centroleninae	Cochranella	euknemos	Cochranella euknemos		Fringe-Limbed Tree Frog, Ranita de Cristal	Cochranella euknemos			Least Concern (LC)	CO,PA,CR		Cochranella euknemos	FALSE	TRUE	TRUE	FALSE	FALSE	TRUE	FALSE	FALSE	FALSE	FALSE	TRUE	Cochranella euknemos (Savage and Starrett, 1967)	1967
Anura	Centrolenidae	Centroleninae	Cochranella	granulosa	Cochranella granulosa		Granular Glassfrog, Rana de Cristal Granulosa	Cochranella granulosa			Least Concern (LC)	CR,HN,NI,PA		Cochranella granulosa	TRUE	TRUE	TRUE	TRUE	FALSE	TRUE	FALSE	FALSE	FALSE	FALSE	TRUE	Cochranella granulosa (Taylor, 1949)	1949
Anura	Dendrobatidae	Colostethinae	Colostethus	panamensis	Colostethus panamensis		Panama rocket frog	Colostethus panamansis	Colostethus panamansis	Colostethus panamensis	Least Concern (LC)	CO,PA	Grant, T., D. R. Frost, R. IbÃÂ¡ÃÂ±ez D., C. W. Myers, and J. M. Savage. 2006 Bulletin of Zoological Nomenclature 63: 39Ã¢â¬â41 proposed corrected spelling from panamansis.	Colostethus panamensis	FALSE	FALSE	FALSE	TRUE	FALSE	TRUE	FALSE	FALSE	FALSE	FALSE	TRUE	Colostethus panamansis (Dunn, 1933)	1933
Anura	Conrauidae		Conraua	alleni	Conraua alleni			Conraua alleni			Vulnerable (VU)	TG,LR,SL		Conraua alleni	TRUE	FALSE	TRUE	TRUE	FALSE	TRUE	FALSE	FALSE	TRUE	FALSE	TRUE	Conraua alleni (Barbour and Loveridge, 1927)	1927
Anura	Conrauidae		Conraua	beccarii	Conraua beccarii			Conraua beccarii			Least Concern (LC)	ET		Conraua beccarii	FALSE	FALSE	FALSE	TRUE	FALSE	TRUE	FALSE	FALSE	FALSE	FALSE	TRUE	Conraua beccarii (Boulenger, 1911)	1911
Anura	Conrauidae		Conraua	crassipes	Conraua crassipes			Conraua crassipes			Least Concern (LC)	CM,CG,CD,GQ,GA,NG		Conraua crassipes	FALSE	FALSE	FALSE	TRUE	FALSE	TRUE	FALSE	FALSE	FALSE	FALSE	TRUE	Conraua crassipes (Buchholz and Peters, 1875)	1875
Anura	Conrauidae		Conraua	goliath	Conraua goliath		Goliath frog, Giant frog	Conraua goliath			Endangered (EN)	GQ,CM		Conraua goliath	TRUE	TRUE	TRUE	TRUE	TRUE	TRUE	FALSE	FALSE	TRUE	TRUE	TRUE	Conraua goliath (Boulenger, 1906)	1906
Anura	Conrauidae		Conraua	robusta	Conraua robusta			Conraua robusta			Vulnerable (VU)	CM,NG		Conraua robusta	TRUE	FALSE	TRUE	TRUE	FALSE	TRUE	FALSE	FALSE	TRUE	TRUE	TRUE	Conraua robusta Nieden, 1908	1908
Anura	Microhylidae	Asterophryinae	Cophixalus	cheesmanae	Cophixalus cheesmanae			Cophixalus cheesmanae			Least Concern (LC)	PG		Cophixalus cheesmanae	FALSE	FALSE	FALSE	TRUE	FALSE	TRUE	FALSE	FALSE	FALSE	FALSE	TRUE	Cophixalus cheesmanae Parker, 1934	1934
Anura	Microhylidae	Asterophryinae	Cophixalus	verrucosus	Cophixalus verrucosus			Cophixalus verrucosus	Cophixalus sisyphus		Least Concern (LC)	PG		Cophixalus verrucosus	FALSE	FALSE	FALSE	TRUE	FALSE	TRUE	FALSE	FALSE	FALSE	FALSE	TRUE	Cophixalus verrucosus (Boulenger, 1898)	1898
Anura	Microhylidae	Asterophryinae	Copiula	minor	Copiula minor			Copiula minor			Vulnerable (VU)	PG		Copiula minor	FALSE	FALSE	FALSE	TRUE	FALSE	TRUE	FALSE	FALSE	FALSE	FALSE	TRUE	Copiula minor Menzies and Tyler, 1977	1977
Anura	Microhylidae	Asterophryinae	Copiula	oxyrhina	Copiula oxyrhina			Copiula oxyrhina			Least Concern (LC)	PG		Copiula oxyrhina	FALSE	FALSE	FALSE	TRUE	FALSE	TRUE	FALSE	FALSE	FALSE	FALSE	TRUE	Copiula oxyrhina (Boulenger, 1898)	1898
Anura	Ceratobatrachidae	Ceratobatrachinae	Cornufer	bufoniformis	Cornufer bufoniformis			Cornufer bufoniformis			Least Concern (LC)	PG,SB		Cornufer bufoniformis	FALSE	FALSE	FALSE	FALSE	FALSE	FALSE	FALSE	FALSE	FALSE	TRUE	TRUE	Cornufer bufoniformis (Boulenger, 1884)	1884
Anura	Ceratobatrachidae	Ceratobatrachinae	Cornufer	guentheri	Cornufer guentheri			Cornufer guentheri			Least Concern (LC)	SB,PG		Cornufer guentheri	TRUE	FALSE	TRUE	FALSE	FALSE	TRUE	FALSE	FALSE	TRUE	TRUE	TRUE	Cornufer guentheri (Boulenger, 1884)	1884
Anura	Ceratobatrachidae	Ceratobatrachinae	Cornufer	guppyi	Cornufer guppyi			Cornufer guppyi	Discodeles guppyi	Cornufer guppyi	Least Concern (LC)	PG,SB		Cornufer guppyi	FALSE	FALSE	FALSE	FALSE	FALSE	FALSE	FALSE	FALSE	FALSE	TRUE	TRUE	Cornufer guppyi (Boulenger, 1884)	1884
Anura	Ceratobatrachidae	Ceratobatrachinae	Cornufer	opisthodon	Cornufer opisthodon			Cornufer opisthodon			Data Deficient (DD)	PG,SB		Cornufer opisthodon	FALSE	FALSE	FALSE	FALSE	FALSE	FALSE	FALSE	FALSE	FALSE	TRUE	TRUE	Cornufer opisthodon (Boulenger, 1884)	1884
Anura	Ceratobatrachidae	Ceratobatrachinae	Cornufer	vitiensis	Cornufer vitiensis		Fiji Tree Frog	Cornufer vitiensis	Halophila vitiensis, Halophila chryseus, Cornufer intermedius	Halophila vitiensis, Halophila chryseus, Cornufer intermedius	Near Threatened (NT)	FJ		Cornufer vitiensis	FALSE	FALSE	FALSE	FALSE	FALSE	FALSE	FALSE	FALSE	TRUE	FALSE	TRUE	Cornufer vitiensis (Girard, 1853)	1853
Anura	Ceratobatrachidae	Ceratobatrachinae	Cornufer	vogti	Cornufer vogti			Cornufer vogti			Least Concern (LC)	PG		Cornufer vogti	FALSE	FALSE	FALSE	FALSE	FALSE	FALSE	FALSE	FALSE	FALSE	TRUE	TRUE	Cornufer vogti (Hediger, 1934)	1934
Anura	Craugastoridae		Craugastor	angelicus	Craugastor angelicus	Craugastor		Craugastor angelicus	Eleutherodactylus angelicus	Eleutherodactylus angelicus	Critically Endangered (CR)	CR		Craugastor angelicus	FALSE	FALSE	FALSE	FALSE	FALSE	FALSE	FALSE	FALSE	FALSE	TRUE	TRUE	Craugastor angelicus (Savage, 1975)	1975
Anura	Craugastoridae		Craugastor	augusti	Craugastor augusti	Hylactophryne	Barking Frog, Western Barking Frog (<i>C. a. cactorum</i>), Eastern Barking Frog (<i>C. a. latrans</i>)	Craugastor augusti	Hylactophryne augusti, Hylodes augusti, Eleutherodactylus augusti	Hylactophryne augusti, Hylodes augusti, Eleutherodactylus augusti	Least Concern (LC)	US,MX		Craugastor augusti	FALSE	FALSE	FALSE	FALSE	FALSE	FALSE	FALSE	FALSE	TRUE	FALSE	TRUE	Craugastor augusti (Dugès, 1879)	1879
Anura	Craugastoridae		Craugastor	crassidigitus	Craugastor crassidigitus	Craugastor	Isla Bonita Robber Frog	Craugastor crassidigitus	Eleutherodactylus crassidigitus	Eleutherodactylus crassidigitus	Least Concern (LC)	CO,CR,PA		Craugastor crassidigitus	FALSE	FALSE	FALSE	TRUE	FALSE	TRUE	FALSE	FALSE	FALSE	FALSE	TRUE	Craugastor crassidigitus (Taylor, 1952)	1952
Anura	Craugastoridae		Craugastor	laticeps	Craugastor laticeps	Craugastor		Craugastor laticeps	Eleutherodactylus laticeps, Eleutherodactylus werleri, Hylodes laticeps	Eleutherodactylus laticeps, Eleutherodactylus werleri, Hylodes laticeps	Near Threatened (NT)	MX,HN,BZ,GT		Craugastor laticeps	FALSE	FALSE	FALSE	TRUE	FALSE	TRUE	FALSE	FALSE	FALSE	FALSE	TRUE	Craugastor laticeps (Duméril, 1853)	1853
Anura	Craugastoridae		Craugastor	rayo	Craugastor rayo	Craugastor		Craugastor rayo	Eleutherodactylus rayo	Eleutherodactylus rayo	Data Deficient (DD)	CR		Craugastor rayo	FALSE	FALSE	FALSE	TRUE	FALSE	TRUE	FALSE	FALSE	FALSE	FALSE	TRUE	Craugastor rayo (Savage and DeWeese, 1979)	1979
Anura	Craugastoridae		Craugastor	tabasarae	Craugastor tabasarae	Craugastor		Craugastor tabasarae			Critically Endangered (CR)	PA		Craugastor tabasarae	FALSE	FALSE	FALSE	TRUE	FALSE	TRUE	FALSE	FALSE	FALSE	FALSE	TRUE	Craugastor tabasarae (Savage, Hollingsworth, Lips, and Jaslow, 2004)	2004
Anura	Myobatrachidae	Myobatrachinae	Crinia	parinsignifera	Crinia parinsignifera		Eastern Sign-bearing Froglet	Crinia parinsignifera			Least Concern (LC)	AU		Crinia parinsignifera	FALSE	FALSE	FALSE	FALSE	FALSE	FALSE	FALSE	FALSE	TRUE	FALSE	TRUE	Crinia parinsignifera Main, 1957	1957
Anura	Myobatrachidae	Myobatrachinae	Crinia	signifera	Crinia signifera		Common Froglet	Crinia signifera			Least Concern (LC)	AU		Crinia signifera	FALSE	FALSE	FALSE	FALSE	FALSE	FALSE	FALSE	FALSE	TRUE	FALSE	TRUE	Crinia signifera Girard, 1853	1853
Anura	Hylidae	Phyllomedusinae	Cruziohyla	calcarifer	Cruziohyla calcarifer			Cruziohyla calcarifer	Agalychnis calcarifer	Agalychnis calcarifer	Least Concern (LC)	CO,CR,EC,NI,PA		Cruziohyla calcarifer	TRUE	TRUE	TRUE	TRUE	FALSE	TRUE	FALSE	FALSE	TRUE	FALSE	TRUE	Cruziohyla calcarifer (Boulenger, 1902)	1902
Anura	Hylidae	Phyllomedusinae	Cruziohyla	craspedopus	Cruziohyla craspedopus			Cruziohyla craspedopus	Agalychnis craspedopus	Agalychnis craspedopus	Least Concern (LC)	BR,CO,EC,PE		Cruziohyla craspedopus	TRUE	TRUE	TRUE	TRUE	FALSE	TRUE	FALSE	FALSE	TRUE	FALSE	TRUE	Cruziohyla craspedopus (Funkhouser, 1957)	1957
Anura	Hylidae	Phyllomedusinae	Cruziohyla	sylviae	Cruziohyla sylviae		Sylvia's Tree Frog; Rana arbÃÂ³rea de Sylvia				NA	CR,HN,NI,PA		Cruziohyla sylviae	TRUE	FALSE	TRUE	FALSE	FALSE	TRUE	FALSE	FALSE	FALSE	FALSE	TRUE	Cruziohyla sylviae Gray, 2018	2018
Caudata	Cryptobranchidae		Cryptobranchus	alleganiensis	Cryptobranchus alleganiensis		Hellbender, Eastern Hellbender, Ozark Hellbender, Snot Otter	Cryptobranchus alleganiensis	Salamandra alleganiensis	Salamandra alleganiensis	Near Threatened (NT)	US		Cryptobranchus alleganiensis	FALSE	TRUE	TRUE	FALSE	TRUE	TRUE	TRUE	III	TRUE	TRUE	TRUE	Cryptobranchus alleganiensis (Sonnini de Manoncourt and Latreille, 1801)	1801
Anura	Hyperoliidae		Cryptothylax	greshoffii	Cryptothylax greshoffii			Cryptothylax greshoffii			Least Concern (LC)	AO,CM,CF,CG,CD,GQ,GA		Cryptothylax greshoffii	FALSE	FALSE	FALSE	TRUE	FALSE	TRUE	FALSE	FALSE	FALSE	FALSE	TRUE	Cryptothylax greshoffii (Schilthuis, 1889)	1889
Anura	Hyperoliidae		Cryptothylax	minutus	Cryptothylax minutus			Cryptothylax minutus			Data Deficient (DD)	CD		Cryptothylax minutus	FALSE	FALSE	FALSE	TRUE	FALSE	TRUE	FALSE	FALSE	FALSE	FALSE	TRUE	Cryptothylax minutus Laurent, 1976	1976
Anura	Microhylidae	Gastrophryninae	Ctenophryne	aterrima	Ctenophryne aterrima		Black Narrow-Mouthed Frog, Costa Rica Nelson Frog	Ctenophryne aterrima			Least Concern (LC)	EC,CO,PA,CR		Ctenophryne aterrima	FALSE	TRUE	TRUE	FALSE	FALSE	TRUE	FALSE	FALSE	FALSE	FALSE	TRUE	Ctenophryne aterrima (Günther, 1901)	1901
Caudata	Salamandridae	Pleurodelinae	Cynops	chenggongensis	Cynops chenggongensis	Hypselotriton	Chenggong Fire-bellied Newt	Hypselotriton chenggongensis	Hypselotriton chenggongensis		Data Deficient (DD)	CN	Placed in Hypselotriton (Hypselotriton) by Dubois and Raffaelli 2009, 2012 Alytes.	Cynops chenggongensis	TRUE	FALSE	TRUE	FALSE	FALSE	TRUE	FALSE	FALSE	FALSE	FALSE	TRUE	Cynops chenggongensis Kou and Xing, 1983	1983
Caudata	Salamandridae	Pleurodelinae	Cynops	cyanurus	Cynops cyanurus	Cynotriton	Blue-tailed Fire-bellied Newt, Chuxiong Fire-bellied Newt	Hypselotriton cyanurus	Hypselotriton cyanurus		Least Concern (LC)	CN	Placed in Hypselotriton (Hypselotriton) by Dubois and Raffaelli 2009, 2012 Alytes. Dubois and Raffaelli 2012 Alytes and Raffaelli 2013recognize yunnanensis as a valid species, but this is not followed by Chinese authors, and by Sparreboom 2014, who	Cynops cyanurus	TRUE	TRUE	TRUE	TRUE	FALSE	TRUE	FALSE	FALSE	TRUE	TRUE	TRUE	Cynops cyanurus Liu, Hu, and Yang, 1962	1962
Caudata	Salamandridae	Pleurodelinae	Cynops	ensicauda	Cynops ensicauda	Cynops	Sword-tailed Newt, Shiriken Imori	Cynops ensicauda			Endangered (EN)	JP		Cynops ensicauda	TRUE	TRUE	TRUE	TRUE	TRUE	TRUE	FALSE	FALSE	TRUE	TRUE	TRUE	Cynops ensicauda (Hallowell, 1861)	1861
Caudata	Salamandridae	Pleurodelinae	Cynops	fudingensis	Cynops fudingensis	Cynotriton	Fuding Fire-bellied Newt				NA	CN	Placed in Hypselotriton (Cynotriton) by Dubois and Raffaelli 2009, 2012 Alytes.	Cynops fudingensis	TRUE	FALSE	TRUE	FALSE	FALSE	TRUE	FALSE	FALSE	FALSE	FALSE	TRUE	Cynops fudingensis Wu, Wang, Jiang, and Hanken, 2010	2010
Caudata	Salamandridae	Pleurodelinae	Cynops	orientalis	Cynops orientalis	Cynotriton	Oriental Fire-bellied Newt	Hypselotriton orientalis	Hypselotriton orientalis		Least Concern (LC)	CN	Placed in Hypselotriton (Cynotriton) by Dubois and Raffaelli 2009, 2012 Alytes.	Cynops orientalis	TRUE	TRUE	TRUE	TRUE	FALSE	TRUE	FALSE	FALSE	TRUE	TRUE	TRUE	Cynops orientalis (David, 1873)	1873
Caudata	Salamandridae	Pleurodelinae	Cynops	orphicus	Cynops orphicus	Cynotriton	Dayang Newt; hypselotriton de Guizhou	Hypselotriton orphicus	Hypselotriton orphicus		Endangered (EN)	CN	Placed in Hypselotriton (Cynotriton) by Dubois and Raffaelli 2009, 2012 Alytes.	Cynops orphicus	TRUE	TRUE	TRUE	FALSE	FALSE	TRUE	FALSE	FALSE	FALSE	FALSE	TRUE	Cynops orphicus Risch, 1983	1983
Caudata	Salamandridae	Pleurodelinae	Cynops	pyrrhogaster	Cynops pyrrhogaster	Cynops	Japanese Newt	Cynops pyrrhogaster			Least Concern (LC)	JP		Cynops pyrrhogaster	TRUE	TRUE	TRUE	TRUE	FALSE	TRUE	FALSE	FALSE	TRUE	TRUE	TRUE	Cynops pyrrhogaster (Boie, 1826)	1826
Anura	Dendrobatidae	Dendrobatinae	Dendrobates	auratus	Dendrobates auratus		Green Poison Frog, Green and Black Dart-poison Frog, Gold Arrow-poison Frog	Dendrobates auratus			Least Concern (LC)	US,PA,NI,CR,CO		Dendrobates auratus	TRUE	TRUE	TRUE	TRUE	TRUE	TRUE	TRUE	II	TRUE	TRUE	TRUE	Dendrobates auratus (Girard, 1855)	1855
Anura	Dendrobatidae	Dendrobatinae	Dendrobates	leucomelas	Dendrobates leucomelas		Yellow-headed Poison Frog, Yellow-banded dart-poison frog, Bumblebee Poison Dart Frog	Dendrobates leucomelas			Least Concern (LC)	VE,GY,CO,BR		Dendrobates leucomelas	TRUE	TRUE	TRUE	TRUE	TRUE	TRUE	TRUE	II	TRUE	TRUE	TRUE	Dendrobates leucomelas Steindachner, 1864	1864
Anura	Dendrobatidae	Dendrobatinae	Dendrobates	tinctorius	Dendrobates tinctorius		Dyeing Poison Frog	Dendrobates tinctorius	Dendrobates azureus, Rana tinctoria	Dendrobates azureus, Rana tinctoria	Least Concern (LC)	SR,GY,GF,BR		Dendrobates tinctorius	TRUE	TRUE	TRUE	TRUE	TRUE	TRUE	TRUE	II	TRUE	TRUE	TRUE	Dendrobates tinctorius (Cuvier, 1797)	1797
Anura	Dendrobatidae	Dendrobatinae	Dendrobates	truncatus	Dendrobates truncatus			Dendrobates truncatus			Least Concern (LC)	CO		Dendrobates truncatus	TRUE	TRUE	TRUE	TRUE	TRUE	TRUE	TRUE	II	TRUE	TRUE	TRUE	Dendrobates truncatus (Cope, 1861)	1861
Anura	Hylidae	Hylinae	Dendropsophus	acreanus	Dendropsophus acreanus			Dendropsophus acreanus	Hyla acreana	Hyla acreana	Least Concern (LC)	PE,BO,BR		Dendropsophus acreanus	FALSE	FALSE	FALSE	TRUE	FALSE	TRUE	FALSE	FALSE	FALSE	FALSE	TRUE	Dendropsophus acreanus (Bokermann, 1964)	1964
Anura	Hylidae	Hylinae	Dendropsophus	carnifex	Dendropsophus carnifex			Dendropsophus carnifex	Hyla carnifex	Hyla carnifex	Least Concern (LC)	EC,CO		Dendropsophus carnifex	FALSE	FALSE	FALSE	TRUE	FALSE	TRUE	FALSE	FALSE	FALSE	FALSE	TRUE	Dendropsophus carnifex (Duellman, 1969)	1969
Anura	Hylidae	Hylinae	Dendropsophus	columbianus	Dendropsophus columbianus			Dendropsophus columbianus	Hyla columbiana	Hyla columbiana	Least Concern (LC)	CO,EC		Dendropsophus columbianus	FALSE	TRUE	TRUE	FALSE	FALSE	TRUE	FALSE	FALSE	FALSE	FALSE	TRUE	Dendropsophus columbianus (Boettger, 1892)	1892
Anura	Hylidae	Hylinae	Dendropsophus	ebraccatus	Dendropsophus ebraccatus		Hourglass Treefrog	Dendropsophus ebraccatus	Hyla ebraccata	Hyla ebraccata	Least Concern (LC)	BZ,CO,CR,EC,GT,HN,MX,NI,PA		Dendropsophus ebraccatus	TRUE	TRUE	TRUE	TRUE	FALSE	TRUE	FALSE	FALSE	TRUE	TRUE	TRUE	Dendropsophus ebraccatus (Cope, 1874)	1874
Anura	Hylidae	Hylinae	Dendropsophus	labialis	Dendropsophus labialis		Green Dotted Treefrog	Dendropsophus labialis	Hyla labialis	Hyla labialis	Least Concern (LC)	VE,CO		Dendropsophus labialis	FALSE	FALSE	FALSE	TRUE	FALSE	TRUE	FALSE	FALSE	FALSE	FALSE	TRUE	Schmidt, 1857	1857
Anura	Hylidae	Hylinae	Dendropsophus	leali	Dendropsophus leali			Dendropsophus leali	Hyla leali	Hyla leali	Least Concern (LC)	BO,BR,CO,PE		Dendropsophus leali	FALSE	FALSE	FALSE	TRUE	FALSE	TRUE	FALSE	FALSE	FALSE	FALSE	TRUE	Dendropsophus leali (Bokermann, 1964)	1964
Anura	Hylidae	Hylinae	Dendropsophus	leucophyllatus	Dendropsophus leucophyllatus		Clown Tree Frog	Dendropsophus leucophyllatus	Hyla leucophyllata, Hyla bufoides, Rana leucophyllata	Hyla leucophyllata, Hyla bufoides, Rana leucophyllata	Least Concern (LC)	BO,BR,CO,EC,GF,GY,PE,SR		Dendropsophus leucophyllatus	TRUE	TRUE	TRUE	TRUE	FALSE	TRUE	FALSE	FALSE	TRUE	TRUE	TRUE	Dendropsophus leucophyllatus (Beireis, 1783)	1783
Anura	Hylidae	Hylinae	Dendropsophus	marmoratus	Dendropsophus marmoratus			Dendropsophus marmoratus	Hyla marmorata, Bufo marmoratus	Hyla marmorata, Bufo marmoratus	Least Concern (LC)	BO,BR,CO,EC,GF,GY,PE,SR,VE		Dendropsophus marmoratus	TRUE	TRUE	TRUE	TRUE	FALSE	TRUE	FALSE	FALSE	TRUE	FALSE	TRUE	Dendropsophus marmoratus (Laurenti, 1768)	1768
Anura	Hylidae	Hylinae	Dendropsophus	melanargyreus	Dendropsophus melanargyreus			Dendropsophus melanargyreus	Hyla melanargyrea	Hyla melanargyrea	Least Concern (LC)	BO,BR,SR		Dendropsophus melanargyreus	TRUE	FALSE	TRUE	FALSE	FALSE	TRUE	FALSE	FALSE	FALSE	FALSE	TRUE	Dendropsophus melanargyreus (Cope, 1887)	1887
Anura	Hylidae	Hylinae	Dendropsophus	microcephalus	Dendropsophus microcephalus		Small-headed Dwarf Treefrog, Yellow Treefrog	Dendropsophus microcephalus	Hyla microcephala	Hyla microcephala	Least Concern (LC)	BZ,BR,CO,CR,GF,GT,GY,HN,MX,NI,PA,SR,TT,VE		Dendropsophus microcephalus	TRUE	FALSE	TRUE	TRUE	FALSE	TRUE	FALSE	FALSE	FALSE	FALSE	TRUE	Dendropsophus microcephalus (Cope, 1886)	1886
Anura	Hylidae	Hylinae	Dendropsophus	minutus	Dendropsophus minutus		Lesser Treefrog	Dendropsophus minutus	Hyla minuta	Hyla minuta	Least Concern (LC)	AR,BO,BR,CO,EC,GF,GY,PE,SR,TT,UY,VE		Dendropsophus minutus	FALSE	FALSE	FALSE	TRUE	FALSE	TRUE	FALSE	FALSE	FALSE	FALSE	TRUE	Dendropsophus minutus (Peters, 1872)	1872
Anura	Hylidae	Hylinae	Dendropsophus	nanus	Dendropsophus nanus			Dendropsophus nanus	Hyla nana, Sphoenohyla nana	Hyla nana, Sphoenohyla nana	Least Concern (LC)	UY,BO,AR,PY,BR		Dendropsophus nanus	FALSE	FALSE	FALSE	FALSE	FALSE	FALSE	FALSE	FALSE	TRUE	FALSE	TRUE	Dendropsophus nanus (Boulenger, 1889)	1889
Anura	Hylidae	Hylinae	Dendropsophus	parviceps	Dendropsophus parviceps			Dendropsophus parviceps	Hyla parviceps	Hyla parviceps	Least Concern (LC)	BO,VE,PE,EC,CO,BR		Dendropsophus parviceps	FALSE	FALSE	FALSE	TRUE	FALSE	TRUE	FALSE	FALSE	FALSE	FALSE	TRUE	Dendropsophus parviceps (Boulenger, 1882)	1882
Anura	Hylidae	Hylinae	Dendropsophus	reticulatus	Dendropsophus reticulatus		Reticulate Treefrog; Ranita reticulada				NA	BR,CO,EC,PE		Dendropsophus reticulatus	TRUE	FALSE	TRUE	FALSE	FALSE	TRUE	FALSE	FALSE	FALSE	FALSE	TRUE	Dendropsophus reticulatus (Jiménez de la Espada, 1870)	1870
Anura	Hylidae	Hylinae	Dendropsophus	riveroi	Dendropsophus riveroi			Dendropsophus riveroi	Hyla riveroi	Hyla riveroi	Least Concern (LC)	BO,PE,BR,EC,CO		Dendropsophus riveroi	FALSE	FALSE	FALSE	TRUE	FALSE	TRUE	FALSE	FALSE	FALSE	FALSE	TRUE	Dendropsophus riveroi (Cochran and Goin, 1970)	1970
Anura	Hylidae	Hylinae	Dendropsophus	sarayacuensis	Dendropsophus sarayacuensis		Sarayacu Treefrog, Shreve's Sarayacu Treefrog, Ranita de Sarayacu	Dendropsophus sarayacuensis	Hyla sarayacuensis, Hyla leucophyllata sarayacuensis	Hyla sarayacuensis, Hyla leucophyllata sarayacuensis	Least Concern (LC)	BO,BR,CO,EC,PE,VE		Dendropsophus sarayacuensis	TRUE	FALSE	TRUE	FALSE	FALSE	TRUE	FALSE	FALSE	FALSE	FALSE	TRUE	Dendropsophus sarayacuensis (Shreve, 1935)	1935
Anura	Hylidae	Hylinae	Dendropsophus	seniculus	Dendropsophus seniculus			Dendropsophus seniculus	Hyla senicula	Hyla senicula	Least Concern (LC)	BR		Dendropsophus seniculus	FALSE	FALSE	FALSE	FALSE	FALSE	FALSE	FALSE	FALSE	TRUE	FALSE	TRUE	Dendropsophus seniculus (Cope, 1868)	1868
Anura	Hylidae	Hylinae	Dendropsophus	triangulum	Dendropsophus triangulum			Dendropsophus triangulum	Hyla triangulum	Hyla triangulum	Least Concern (LC)	BO,BR,CO,EC,PE		Dendropsophus triangulum	TRUE	FALSE	TRUE	TRUE	FALSE	TRUE	FALSE	FALSE	FALSE	FALSE	TRUE	Dendropsophus triangulum (Günther, 1869)	1869
Anura	Microhylidae	Gastrophryninae	Dermatonotus	muelleri	Dermatonotus muelleri		Muller's Termite Frog	Dermatonotus muelleri			Least Concern (LC)	PY,BR,BO,AR		Dermatonotus muelleri	TRUE	TRUE	TRUE	TRUE	FALSE	TRUE	FALSE	FALSE	TRUE	TRUE	TRUE	Dermatonotus muelleri (Boettger, 1885)	1885
Gymnophiona	Dermophiidae		Dermophis	mexicanus	Dermophis mexicanus		Mexican Caecilian	Dermophis mexicanus			Vulnerable (VU)	SV,GT,HN,MX,NI		Dermophis mexicanus	FALSE	TRUE	TRUE	TRUE	FALSE	TRUE	FALSE	FALSE	FALSE	TRUE	TRUE	Dermophis mexicanus (Duméril and Bibron, 1841)	1841
Caudata	Plethodontidae	Plethodontinae	Desmognathus	aeneus	Desmognathus aeneus	Geognathus	Seepage Salamander	Desmognathus aeneus			Near Threatened (NT)	US		Desmognathus aeneus	TRUE	FALSE	TRUE	FALSE	FALSE	TRUE	FALSE	FALSE	FALSE	FALSE	TRUE	Desmognathus aeneus Brown and Bishop, 1947	1947
Caudata	Plethodontidae	Plethodontinae	Desmognathus	conanti	Desmognathus conanti	Desmognathus	Spotted Dusky Salamander				NA	US		Desmognathus conanti	TRUE	FALSE	TRUE	FALSE	FALSE	TRUE	FALSE	FALSE	FALSE	FALSE	TRUE	Desmognathus conanti Rossman, 1958	1958
Caudata	Plethodontidae	Plethodontinae	Desmognathus	fuscus	Desmognathus fuscus	Desmognathus	Northern Dusky Salamander	Desmognathus fuscus	Salamandra fusca, Desmognathus phoca	Salamandra fusca, Desmognathus phoca	Least Concern (LC)	US,CA		Desmognathus fuscus	TRUE	TRUE	TRUE	TRUE	FALSE	TRUE	FALSE	FALSE	TRUE	FALSE	TRUE	Desmognathus fuscus (Green, 1818)	1818
Caudata	Plethodontidae	Plethodontinae	Desmognathus	imitator	Desmognathus imitator	Desmognathus	Imitator Salamander	Desmognathus imitator			Least Concern (LC)	US		Desmognathus imitator	FALSE	TRUE	TRUE	FALSE	FALSE	TRUE	FALSE	FALSE	FALSE	FALSE	TRUE	Desmognathus imitator Dunn, 1927	1927
Caudata	Plethodontidae	Plethodontinae	Desmognathus	monticola	Desmognathus monticola	Desmognathus	Seal Salamander	Desmognathus monticola			Least Concern (LC)	US		Desmognathus monticola	TRUE	TRUE	TRUE	FALSE	FALSE	TRUE	FALSE	FALSE	TRUE	FALSE	TRUE	Desmognathus monticola Dunn, 1916	1916
Caudata	Plethodontidae	Plethodontinae	Desmognathus	ocoee	Desmognathus ocoee	Desmognathus	Ocoee Salamander	Desmognathus ocoee			Least Concern (LC)	US		Desmognathus ocoee	FALSE	TRUE	TRUE	FALSE	FALSE	TRUE	FALSE	FALSE	FALSE	FALSE	TRUE	Desmognathus ocoee Nicholls, 1949	1949
Caudata	Plethodontidae	Plethodontinae	Desmognathus	orestes	Desmognathus orestes	Desmognathus	Blue Ridge Dusky Salamander	Desmognathus orestes			Least Concern (LC)	US		Desmognathus orestes	FALSE	TRUE	TRUE	FALSE	FALSE	TRUE	FALSE	FALSE	FALSE	FALSE	TRUE	Desmognathus orestes Tilley and Mahoney, 1996	1996
Caudata	Plethodontidae	Plethodontinae	Desmognathus	organi	Desmognathus organi	Geognathus	Northern Pygmy Salamander				NA	US		Desmognathus organi	FALSE	TRUE	TRUE	FALSE	FALSE	TRUE	FALSE	FALSE	FALSE	FALSE	TRUE	Desmognathus organi Crespi, Browne, and Rissler, 2010	2010
Caudata	Plethodontidae	Plethodontinae	Desmognathus	quadramaculatus	Desmognathus quadramaculatus	Leurognathus	Black-bellied Salamander, Common Blackbelly Salamander	Desmognathus quadramaculatus	Salamandra quadra-maculata, Salamandra quadramaculata	Salamandra quadra-maculata, Salamandra quadramaculata	Least Concern (LC)	US		Desmognathus quadramaculatus	TRUE	TRUE	TRUE	FALSE	FALSE	TRUE	FALSE	FALSE	TRUE	FALSE	TRUE	Desmognathus quadramaculatus (Holbrook, 1840)	1840
Caudata	Plethodontidae	Plethodontinae	Desmognathus	wrighti	Desmognathus wrighti	Geognathus	Pygmy Salamander	Desmognathus wrighti			Least Concern (LC)	US		Desmognathus wrighti	FALSE	TRUE	TRUE	FALSE	FALSE	TRUE	FALSE	FALSE	FALSE	FALSE	TRUE	Desmognathus wrighti King, 1936	1936
Anura	Eleutherodactylidae	Eleutherodactylinae	Diasporus	diastema	Diasporus diastema			Diasporus diastema	Eleutherodactylus diastema	Eleutherodactylus diastema	Least Concern (LC)	CO,CR,EC,HN,NI,PA		Diasporus diastema	FALSE	FALSE	FALSE	TRUE	FALSE	TRUE	FALSE	FALSE	FALSE	FALSE	TRUE	Diasporus diastema (Cope, 1875)	1875
Caudata	Dicamptodontidae		Dicamptodon	aterrimus	Dicamptodon aterrimus		Idaho Giant Salamander	Dicamptodon aterrimus	Ambystoma aterrimum	Ambystoma aterrimum	Least Concern (LC)	US		Dicamptodon aterrimus	FALSE	FALSE	FALSE	FALSE	FALSE	FALSE	FALSE	FALSE	TRUE	FALSE	TRUE	Dicamptodon aterrimus (Cope, 1868)	1868
Caudata	Dicamptodontidae		Dicamptodon	ensatus	Dicamptodon ensatus		California Giant Salamander	Dicamptodon ensatus	Triton ensatus	Triton ensatus	Near Threatened (NT)	US		Dicamptodon ensatus	FALSE	FALSE	FALSE	TRUE	FALSE	TRUE	FALSE	FALSE	FALSE	FALSE	TRUE	Dicamptodon ensatus (Eschscholtz, 1833)	1833
Caudata	Dicamptodontidae		Dicamptodon	tenebrosus	Dicamptodon tenebrosus		Pacific Giant Salamander, Coastal Giant Salamander	Dicamptodon tenebrosus	Ambystoma tenebrosum, Amblystoma tenebrosum	Ambystoma tenebrosum, Amblystoma tenebrosum	Least Concern (LC)	US,CA		Dicamptodon tenebrosus	FALSE	TRUE	TRUE	FALSE	FALSE	TRUE	FALSE	FALSE	FALSE	FALSE	TRUE	Dicamptodon tenebrosus (Baird and Girard, 1852)	1852
Anura	Alytidae	Discoglossinae	Discoglossus	pictus	Discoglossus pictus		Painted frog, Discoglosse peint, Gemalter scheibenzÃÂ¼ngler, Sapillo pintojo, Rana dipinta, Granota pintada, Gripau granoter, Malet frÃÂ¸, Kirju ketaskeelkonn, Apo pintatua, Discoglosso dipinto, Schijftongkikker, Kirjosammakko, Skivtunggroda	Discoglossus pictus			Least Concern (LC)	DZ,FR,IT,MT,MA,ES,TN		Discoglossus pictus	FALSE	TRUE	TRUE	TRUE	FALSE	TRUE	FALSE	FALSE	FALSE	FALSE	TRUE	Discoglossus pictus Otth, 1837	1837
Anura	Alytidae	Discoglossinae	Discoglossus	scovazzi	Discoglossus scovazzi		Moroccan Painted Frog	Discoglossus scovazzi			Least Concern (LC)	DZ,MA,ES		Discoglossus scovazzi	TRUE	TRUE	TRUE	FALSE	FALSE	TRUE	FALSE	FALSE	FALSE	FALSE	TRUE	Discoglossus scovazzi Camerano, 1878	1878
Anura	Bufonidae		Duttaphrynus	himalayanus	Duttaphrynus himalayanus		Himalayan Toad	Duttaphrynus himalayanus	Bufo himalayanus, Bufo abatus	Bufo himalayanus, Bufo abatus	Least Concern (LC)	BT,CN,IN,NP,PK		Duttaphrynus himalayanus	FALSE	FALSE	FALSE	FALSE	FALSE	FALSE	FALSE	FALSE	FALSE	TRUE	TRUE	Duttaphrynus himalayanus (Günther, 1864)	1864
Anura	Bufonidae		Duttaphrynus	melanostictus	Duttaphrynus melanostictus		Southeast Asian Toad, Asian Common Toad, Spectacled Toad, Asian Black-spined Toad	Duttaphrynus melanostictus	Bufo melanostictus	Bufo melanostictus	Least Concern (LC)	BD,BT,BN,KH,CN,HK,IN,ID,LA,MY,MV,MM,NP,PK,SG,LK,TW,TH,VN		Duttaphrynus melanostictus	TRUE	TRUE	TRUE	TRUE	FALSE	TRUE	FALSE	FALSE	TRUE	TRUE	TRUE	Duttaphrynus melanostictus (Schneider, 1799)	1799
Anura	Microhylidae	Dyscophinae	Dyscophus	antongilii	Dyscophus antongilii		Tomato Frog	Dyscophus antongilii			Least Concern (LC)	MG		Dyscophus antongilii	TRUE	TRUE	TRUE	TRUE	TRUE	TRUE	TRUE	II	TRUE	TRUE	TRUE	Dyscophus antongilii Grandidier, 1877	1877
Anura	Microhylidae	Dyscophinae	Dyscophus	guineti	Dyscophus guineti			Dyscophus guineti			Least Concern (LC)	MG		Dyscophus guineti	TRUE	TRUE	TRUE	TRUE	TRUE	TRUE	TRUE	II	TRUE	TRUE	TRUE	Dyscophus guineti (Grandidier, 1875)	1875
Anura	Microhylidae	Dyscophinae	Dyscophus	insularis	Dyscophus insularis			Dyscophus insularis			Least Concern (LC)	MG		Dyscophus insularis	TRUE	FALSE	TRUE	TRUE	TRUE	TRUE	TRUE	II	TRUE	TRUE	TRUE	Dyscophus insularis Grandidier, 1872	1872
Caudata	Salamandridae	Pleurodelinae	Echinotriton	andersoni	Echinotriton andersoni		AndersonÃ¢â¬â¢s Spiny Crocodile Newt	Echinotriton andersoni			Endangered (EN)	TW,JP		Echinotriton andersoni	TRUE	TRUE	TRUE	TRUE	FALSE	TRUE	FALSE	FALSE	TRUE	TRUE	TRUE	Echinotriton andersoni (Boulenger, 1892)	1892
Anura	Hylidae	Hylinae	Ecnomiohyla	miotympanum	Ecnomiohyla miotympanum			Ecnomiohyla miotympanum	Hyla miotympanum	Hyla miotympanum	Near Threatened (NT)	MX		Ecnomiohyla miotympanum	FALSE	FALSE	FALSE	FALSE	FALSE	FALSE	FALSE	FALSE	FALSE	TRUE	TRUE	Rheohyla miotympanum (Cope, 1863)	1863
Anura	Hylidae	Hylinae	Ecnomiohyla	valancifer	Ecnomiohyla valancifer			Ecnomiohyla valancifer	Hyla valancifer	Hyla valancifer	Critically Endangered (CR)	MX		Ecnomiohyla valancifer	TRUE	TRUE	TRUE	FALSE	FALSE	TRUE	FALSE	FALSE	FALSE	FALSE	TRUE	Ecnomiohyla valancifer (Firschein and Smith, 1956)	1956
Anura	Leptodactylidae	Leiuperinae	Edalorhina	perezi	Edalorhina perezi		Perez's Snouted Frog	Edalorhina perezi			Least Concern (LC)	BR,CO,EC,PE		Edalorhina perezi	FALSE	TRUE	TRUE	TRUE	FALSE	TRUE	FALSE	FALSE	FALSE	FALSE	TRUE	Edalorhina perezi Jiménez de la Espada, 1870	1870
Anura	Microhylidae	Gastrophryninae	Elachistocleis	surinamensis	Elachistocleis surinamensis		Northeastern Oval Frog	Elachistocleis surinamensis			Least Concern (LC)	GY,VE,TT,SR		Elachistocleis surinamensis	FALSE	FALSE	FALSE	TRUE	FALSE	TRUE	FALSE	FALSE	FALSE	FALSE	TRUE	Elachistocleis surinamensis (Daudin, 1802)	1802
Anura	Eleutherodactylidae	Eleutherodactylinae	Eleutherodactylus	abbotti	Eleutherodactylus abbotti	Eleutherodactylus	Common Chirping Frog	Eleutherodactylus abbotti			Least Concern (LC)	DO,HT		Eleutherodactylus abbotti	FALSE	FALSE	FALSE	TRUE	FALSE	TRUE	FALSE	FALSE	FALSE	FALSE	TRUE	Eleutherodactylus abbotti Cochran, 1923	1923
Anura	Eleutherodactylidae	Eleutherodactylinae	Eleutherodactylus	coqui	Eleutherodactylus coqui	Eleutherodactylus	Puerto Rican Coqui	Eleutherodactylus coqui			Least Concern (LC)	CR,DO,PR,US,VI		Eleutherodactylus coqui	TRUE	FALSE	TRUE	FALSE	FALSE	TRUE	FALSE	FALSE	FALSE	FALSE	TRUE	Eleutherodactylus coqui Thomas, 1966	1966
Anura	Eleutherodactylidae	Eleutherodactylinae	Eleutherodactylus	iberia	Eleutherodactylus iberia	Euhyas	Monte Iberia Dwarf Frog	Eleutherodactylus iberia			Critically Endangered (CR)	CU		Eleutherodactylus iberia	FALSE	TRUE	TRUE	FALSE	FALSE	TRUE	FALSE	FALSE	FALSE	FALSE	TRUE	Eleutherodactylus iberia Estrada and Hedges, 1996	1996
Anura	Eleutherodactylidae	Eleutherodactylinae	Eleutherodactylus	johnstonei	Eleutherodactylus johnstonei	Eleutherodactylus	Lesser Antillean Frog, Johnstone's Whistling Frog	Eleutherodactylus johnstonei			Least Concern (LC)	AI,AG,AW,BB,BM,BR,CO,CR,DM,GF,GD,GP,GY,JM,MQ,MS,AN,PA,KN,LC,VC,TT,VE		Eleutherodactylus johnstonei	TRUE	FALSE	TRUE	FALSE	FALSE	TRUE	FALSE	FALSE	FALSE	FALSE	TRUE	Eleutherodactylus johnstonei Barbour, 1914	1914
Anura	Eleutherodactylidae	Eleutherodactylinae	Eleutherodactylus	martinicensis	Eleutherodactylus martinicensis	Eleutherodactylus	Martinique Frog, Martinique Robber Frog	Eleutherodactylus martinicensis	Hylodes martinicensis	Hylodes martinicensis	Near Threatened (NT)	AG,DM,GP,MQ,US		Eleutherodactylus martinicensis	FALSE	TRUE	TRUE	FALSE	FALSE	TRUE	FALSE	FALSE	TRUE	FALSE	TRUE	Eleutherodactylus martinicensis (Tschudi, 1838)	1838
Anura	Eleutherodactylidae	Eleutherodactylinae	Eleutherodactylus	montanus	Eleutherodactylus montanus	Eleutherodactylus	Hispaniolan Montane Frog	Eleutherodactylus montanus			Endangered (EN)	DO		Eleutherodactylus montanus	FALSE	FALSE	FALSE	TRUE	FALSE	TRUE	FALSE	FALSE	FALSE	FALSE	TRUE	Eleutherodactylus montanus Schmidt, 1919	1919
Anura	Eleutherodactylidae	Eleutherodactylinae	Eleutherodactylus	planirostris	Eleutherodactylus planirostris	Euhyas	Cuban Flat-headed Frog, Greenhouse Frog	Eleutherodactylus planirostris			Least Concern (LC)	BS,KY,CU,GU,HN,JM,MX,PA,TC,US		Eleutherodactylus planirostris	TRUE	TRUE	TRUE	TRUE	FALSE	TRUE	FALSE	FALSE	FALSE	FALSE	TRUE	Eleutherodactylus planirostris (Cope, 1862)	1862
Anura	Leptodactylidae	Leiuperinae	Engystomops	pustulosus	Engystomops pustulosus		TÃÂºngara frog	Engystomops pustulosus	Physalaemus pustulosus, Physalaemus stentor, Paludicola pustulosa	Physalaemus pustulosus, Physalaemus stentor, Paludicola pustulosa	Least Concern (LC)	TT,PA,CR,NI,SV,HN,BZ,GT,VE,CO,MX		Engystomops pustulosus	TRUE	TRUE	TRUE	TRUE	FALSE	TRUE	FALSE	FALSE	TRUE	FALSE	TRUE	Engystomops pustulosus (Cope, 1864)	1864
Caudata	Plethodontidae	Plethodontinae	Ensatina	eschscholtzii	Ensatina eschscholtzii		Ensatina Salamander, Common Ensatina, Yellow-blotched Ensatina, Monterey Ensatina, Oregon Ensatina, Painted Ensatina, Sierra Nevada Ensatina, Yellow-eyed Ensatina, Large-blotched Ensatina	Ensatina eschscholtzii			Least Concern (LC)	CA,MX,US		Ensatina eschscholtzii	FALSE	FALSE	FALSE	TRUE	FALSE	TRUE	FALSE	FALSE	TRUE	FALSE	TRUE	Ensatina eschscholtzii Gray, 1850	1850
Anura	Bufonidae		Epidalea	calamita	Epidalea calamita		Natterjack Toad	Epidalea calamita	Bufo calamita	Bufo calamita	Least Concern (LC)	CZ,GB,UA,CH,SE,ES,RU,PT,PL,NL,LU,LT,LV,IE,DE,FR,EE,DK,BE,BY,AT		Epidalea calamita	TRUE	TRUE	TRUE	FALSE	FALSE	TRUE	FALSE	FALSE	FALSE	FALSE	TRUE	Epidalea calamita (Laurenti, 1768)	1768
Anura	Dendrobatidae	Colostethinae	Epipedobates	anthonyi	Epipedobates anthonyi		Anthony's Poison Arrow Frog	Epipedobates anthonyi			Near Threatened (NT)	EC,PE		Epipedobates anthonyi	TRUE	TRUE	TRUE	FALSE	TRUE	TRUE	TRUE	II	TRUE	TRUE	TRUE	Epipedobates anthonyi (Noble, 1921)	1921
Anura	Dendrobatidae	Colostethinae	Epipedobates	boulengeri	Epipedobates boulengeri			Epipedobates boulengeri			Least Concern (LC)	EC,CO		Epipedobates boulengeri	FALSE	TRUE	TRUE	TRUE	TRUE	TRUE	TRUE	II	FALSE	TRUE	TRUE	Epipedobates boulengeri (Barbour, 1909)	1909
Anura	Dendrobatidae	Colostethinae	Epipedobates	darwinwallacei	Epipedobates darwinwallacei						NA	EC		Epipedobates darwinwallacei	FALSE	FALSE	FALSE	FALSE	TRUE	TRUE	TRUE	II	FALSE	FALSE	TRUE	Epipedobates darwinwallacei Cisneros-Heredia and Yánez-Muñoz, 2011	2011
Anura	Dendrobatidae	Colostethinae	Epipedobates	espinosai	Epipedobates espinosai			Epipedobates espinosai			Data Deficient (DD)	EC		Epipedobates espinosai	FALSE	FALSE	FALSE	FALSE	TRUE	TRUE	TRUE	II	FALSE	FALSE	TRUE	Epipedobates espinosai (Funkhouser, 1956)	1956
Anura	Dendrobatidae	Colostethinae	Epipedobates	machalilla	Epipedobates machalilla			Epipedobates machalilla	Colostethus machalilla	Colostethus machalilla	Near Threatened (NT)	EC		Epipedobates machalilla	FALSE	FALSE	FALSE	FALSE	TRUE	TRUE	TRUE	II	FALSE	FALSE	TRUE	Epipedobates machalilla (Coloma, 1995)	1995
Anura	Dendrobatidae	Colostethinae	Epipedobates	narinensis	Epipedobates narinensis		Narino Poison Frog	Epipedobates narinensis			Data Deficient (DD)	CO		Epipedobates narinensis	FALSE	FALSE	FALSE	FALSE	TRUE	TRUE	TRUE	II	FALSE	FALSE	TRUE	Epipedobates narinensis Mueses-Cisneros, Cepeda-Quilindo, and Moreno-Quintero, 2008	2008
Anura	Dendrobatidae	Colostethinae	Epipedobates	tricolor	Epipedobates tricolor		Phantasmal Poison Frog, Phantasmal Poison-arrow Frog,	Epipedobates tricolor			Endangered (EN)	EC		Epipedobates tricolor	TRUE	TRUE	TRUE	TRUE	TRUE	TRUE	TRUE	II	TRUE	TRUE	TRUE	Epipedobates tricolor (Boulenger, 1899)	1899
Anura	Centrolenidae	Centroleninae	Espadarana	prosoblepon	Espadarana prosoblepon		Emerald Glass Frog, Nicaragua Giant Glassfrog, Variable Glassfrog, Rana de Cristal Variable	Espadarana prosoblepon			Least Concern (LC)	CO,CR,EC,HN,NI,PA		Espadarana prosoblepon	TRUE	TRUE	TRUE	FALSE	FALSE	TRUE	FALSE	FALSE	FALSE	FALSE	TRUE	Espadarana prosoblepon (Boettger, 1892)	1892
Anura	Dicroglossidae	Dicroglossinae	Euphlyctis	cyanophlyctis	Euphlyctis cyanophlyctis		Common skittering frog	Euphlyctis cyanophlyctis			Least Concern (LC)	AF,BT,IN,IR,NP,PK,LK		Euphlyctis cyanophlyctis	FALSE	FALSE	FALSE	FALSE	FALSE	FALSE	FALSE	FALSE	FALSE	TRUE	TRUE	Euphlyctis cyanophlyctis (Schneider, 1799)	1799
Anura	Dicroglossidae	Dicroglossinae	Euphlyctis	hexadactylus	Euphlyctis hexadactylus		Indian Five-fingered Frog, Indian Bullfrog (CITES)	Euphlyctis hexadactylus			Least Concern (LC)	LK,NP,IN,BD		Euphlyctis hexadactylus	FALSE	FALSE	FALSE	TRUE	TRUE	TRUE	TRUE	II	TRUE	TRUE	TRUE	Euphlyctis hexadactylus (Lesson, 1834)	1834
Caudata	Salamandridae	Pleurodelinae	Euproctus	montanus	Euproctus montanus		Corsican brook salamander, Corsican mountain newt, Korsischer Gebirgsmolch, Korsikansk bjergsalamander, Korsika mÃÂ¤givesilik, TritÃÂ³n de CÃÂ³rsega, Euprocte de Corse, Euprotte de Corse, Tritone CÃÂ´rso, Euprotto CÃÂ´rso, Korzik	Euproctus montanus			Least Concern (LC)	FR		Euproctus montanus	FALSE	TRUE	TRUE	FALSE	FALSE	TRUE	FALSE	FALSE	FALSE	FALSE	TRUE	Euproctus montanus (Savi, 1838)	1838
Caudata	Salamandridae	Pleurodelinae	Euproctus	platycephalus	Euproctus platycephalus		Sardinian brook salamander, Sardinian mountain newt, Hechtkopf-Gebirgsmolch, Sardischer Gebirgsmolch. Sardinsk bjergsalamander, Sardiinia mÃÂ¤givesilik, TritÃÂ³n de SerdeÃÂ±a, Euprocte de Sardaigne, Tritone Sardo, Euprotto Sardo, Csukafej	Euproctus platycephalus			Endangered (EN)	IT		Euproctus platycephalus	TRUE	FALSE	TRUE	TRUE	FALSE	TRUE	FALSE	FALSE	FALSE	FALSE	TRUE	Euproctus platycephalus (Gravenhorst, 1829)	1829
Caudata	Plethodontidae	Hemidactyliinae	Eurycea	bislineata	Eurycea bislineata	Manculus	Northern Two-lined Salamander	Eurycea bislineata	Salamandra bislineata	Salamandra bislineata	Least Concern (LC)	US,CA		Eurycea bislineata	TRUE	TRUE	TRUE	TRUE	FALSE	TRUE	FALSE	FALSE	TRUE	FALSE	TRUE	Eurycea bislineata (Green, 1818)	1818
Caudata	Plethodontidae	Hemidactyliinae	Eurycea	cirrigera	Eurycea cirrigera	Manculus	Southern Two-lined Salamander	Eurycea cirrigera			Least Concern (LC)	US		Eurycea cirrigera	TRUE	FALSE	TRUE	FALSE	FALSE	TRUE	FALSE	FALSE	FALSE	FALSE	TRUE	Eurycea cirrigera (Green, 1831)	1831
Caudata	Plethodontidae	Hemidactyliinae	Eurycea	guttolineata	Eurycea guttolineata	Eurycea	Three-lined Salamander	Eurycea guttolineata	Salamandra guttolineata	Salamandra guttolineata	Least Concern (LC)	US		Eurycea guttolineata	TRUE	FALSE	TRUE	FALSE	FALSE	TRUE	FALSE	FALSE	TRUE	FALSE	TRUE	Eurycea guttolineata (Holbrook, 1838)	1838
Caudata	Plethodontidae	Hemidactyliinae	Eurycea	longicauda	Eurycea longicauda	Eurycea	Long-tailed Salamander, Dark-sided Salamander	Eurycea longicauda	Salamandra longicauda	Salamandra longicauda	Least Concern (LC)	US		Eurycea longicauda	TRUE	FALSE	TRUE	FALSE	FALSE	TRUE	FALSE	FALSE	TRUE	FALSE	TRUE	Eurycea longicauda (Green, 1818)	1818
Caudata	Plethodontidae	Hemidactyliinae	Eurycea	lucifuga	Eurycea lucifuga	Eurycea	Cave Salamander	Eurycea lucifuga			Least Concern (LC)	US		Eurycea lucifuga	TRUE	FALSE	TRUE	TRUE	FALSE	TRUE	FALSE	FALSE	FALSE	FALSE	TRUE	Eurycea lucifuga Rafinesque, 1822	1822
Caudata	Plethodontidae	Hemidactyliinae	Eurycea	nana	Eurycea nana	Notiomolge	San Marcos Salamander	Eurycea nana			Vulnerable (VU)	US		Eurycea nana	FALSE	FALSE	FALSE	TRUE	FALSE	TRUE	FALSE	FALSE	TRUE	FALSE	TRUE	Eurycea nana Bishop, 1941	1941
Caudata	Plethodontidae	Hemidactyliinae	Eurycea	quadridigitata	Eurycea quadridigitata	Manculus	Dwarf Salamander, Coastal Plain Dwarf Salamander	Eurycea quadridigitata	Salamandra quadridigitata, Manculus quadridigitatus, Manculus quadridigitatus paludicolus	Salamandra quadridigitata, Manculus quadridigitatus, Manculus quadridigitatus paludicolus	Least Concern (LC)	US		Eurycea quadridigitata	FALSE	FALSE	FALSE	FALSE	FALSE	FALSE	FALSE	FALSE	TRUE	FALSE	TRUE	Eurycea quadridigitata (Holbrook, 1842)	1842
Caudata	Plethodontidae	Hemidactyliinae	Eurycea	rathbuni	Eurycea rathbuni	Typhlomolge	Texas Blind Salamander	Eurycea rathbuni	Typhlomolge rathbuni	Typhlomolge rathbuni	Vulnerable (VU)	US		Eurycea rathbuni	FALSE	FALSE	FALSE	TRUE	FALSE	TRUE	FALSE	FALSE	FALSE	FALSE	TRUE	Eurycea rathbuni (Stejneger, 1896)	1896
Caudata	Plethodontidae	Hemidactyliinae	Eurycea	wilderae	Eurycea wilderae	Manculus	Blue Ridge Two-lined Salamander	Eurycea wilderae			Least Concern (LC)	US		Eurycea wilderae	TRUE	TRUE	TRUE	FALSE	FALSE	TRUE	FALSE	FALSE	FALSE	FALSE	TRUE	Eurycea wilderae Dunn, 1920	1920
Anura	Dendrobatidae	Dendrobatinae	Excidobates	captivus	Excidobates captivus		Santiago Poison Frog	Excidobates captivus	Dendrobates captivus	Dendrobates captivus	Least Concern (LC)	EC,PE		Excidobates captivus	FALSE	TRUE	TRUE	FALSE	TRUE	TRUE	TRUE	II	FALSE	TRUE	TRUE	Excidobates captivus (Myers, 1982)	1982
Anura	Dendrobatidae	Dendrobatinae	Excidobates	mysteriosus	Excidobates mysteriosus		MaraÃÂ±ÃÂ³n Poison Frog	Excidobates mysteriosus	Dendrobates mysteriosus	Dendrobates mysteriosus	Endangered (EN)	PE		Excidobates mysteriosus	TRUE	TRUE	TRUE	FALSE	TRUE	TRUE	TRUE	II	TRUE	TRUE	TRUE	Excidobates mysteriosus (Myers, 1982)	1982
Anura	Hylidae	Hylinae	Exerodonta	catracha	Exerodonta catracha			Exerodonta catracha	Hyla catracha	Hyla catracha	Endangered (EN)	SV,HN		Exerodonta catracha	FALSE	FALSE	FALSE	TRUE	FALSE	TRUE	FALSE	FALSE	FALSE	FALSE	TRUE	Exerodonta catracha (Porras and Wilson, 1987)	1987
Anura	Rhacophoridae	Rhacophorinae	Feihyla	vittata	Feihyla vittata			Feihyla vittata	Chirixalus vittatus	Chirixalus vittatus	Least Concern (LC)	KH,CN,IN,LA,MM,TH,VN		Feihyla vittata	FALSE	FALSE	FALSE	TRUE	FALSE	TRUE	FALSE	FALSE	FALSE	FALSE	TRUE	Feihyla vittata (Boulenger, 1887)	1887
Anura	Dicroglossidae	Dicroglossinae	Fejervarya	cancrivora	Fejervarya cancrivora		Crab-eating Frog, Mangrove Frog, Asian Brackish Frog, Crab-eating Grassfrog	Fejervarya cancrivora	Fejervarya raja		Least Concern (LC)	BN,KH,GU,IN,ID,LA,MY,MM,SG,TH,VN		Fejervarya cancrivora	FALSE	FALSE	FALSE	TRUE	FALSE	TRUE	FALSE	FALSE	TRUE	TRUE	TRUE	Fejervarya cancrivora (Gravenhorst, 1829)	1829
Anura	Dicroglossidae	Dicroglossinae	Fejervarya	limnocharis	Fejervarya limnocharis		Alpine cricket frog	Fejervarya limnocharis			Least Concern (LC)	BD,BN,KH,GU,HK,IN,ID,JP,LA,MO,MY,MM,NP,PK,PH,SG,LK,TW,TH,VN		Fejervarya limnocharis	FALSE	FALSE	FALSE	TRUE	FALSE	TRUE	FALSE	FALSE	TRUE	TRUE	TRUE	Fejervarya limnocharis (Gravenhorst, 1829)	1829
Anura	Dicroglossidae	Dicroglossinae	Fejervarya	triora	Fejervarya triora			Fejervarya triora			Least Concern (LC)	TH		Fejervarya triora	FALSE	FALSE	FALSE	FALSE	FALSE	FALSE	FALSE	FALSE	FALSE	TRUE	TRUE	Fejervarya triora Stuart, Chuaynkern, Chan-ard, and Inger, 2006	2006
Anura	Dicroglossidae	Dicroglossinae	Fejervarya	vittigera	Fejervarya vittigera			Fejervarya vittigera			Least Concern (LC)	PH		Fejervarya vittigera	FALSE	FALSE	FALSE	FALSE	FALSE	FALSE	FALSE	FALSE	FALSE	TRUE	TRUE	Fejervarya vittigera (Wiegmann, 1834)	1834
Anura	Microhylidae	Gastrophryninae	Gastrophryne	carolinensis	Gastrophryne carolinensis		Eastern Narrow-mouthed Toad, Eastern Narrowmouth Toad	Gastrophryne carolinensis	Engystoma carolinensis, Microhyla carolinensis, Microhyla carolinensis carolinensis	Engystoma carolinensis, Microhyla carolinensis, Microhyla carolinensis carolinensis	Least Concern (LC)	BS,KY,PR,US		Gastrophryne carolinensis	TRUE	FALSE	TRUE	FALSE	FALSE	TRUE	FALSE	FALSE	TRUE	FALSE	TRUE	Gastrophryne carolinensis (Holbrook, 1835)	1835
Anura	Hemiphractidae		Gastrotheca	cornuta	Gastrotheca cornuta			Gastrotheca cornuta	Gastrotheca ceratophrys, Nototrema cornutum, Hyla ceratophrys	Gastrotheca ceratophrys, Nototrema cornutum, Hyla ceratophrys	Endangered (EN)	CR,PA,EC,CO		Gastrotheca cornuta	FALSE	FALSE	FALSE	TRUE	FALSE	TRUE	FALSE	FALSE	FALSE	FALSE	TRUE	Gastrotheca cornuta (Boulenger, 1898)	1898
Anura	Hemiphractidae		Gastrotheca	marsupiata	Gastrotheca marsupiata			Gastrotheca marsupiata	Eleutherodactylus andicola, Gastrotheca boliviana, Eleutherodactylus footei, Leptodactylus andicola	Gastrotheca boliviana, Eleutherodactylus footei, Leptodactylus andicola	Least Concern (LC)	PE,BO		Gastrotheca marsupiata	FALSE	FALSE	FALSE	TRUE	FALSE	TRUE	FALSE	FALSE	FALSE	TRUE	TRUE	Gastrotheca marsupiata (Duméril and Bibron, 1841)	1841
Anura	Hemiphractidae		Gastrotheca	monticola	Gastrotheca monticola			Gastrotheca monticola			Least Concern (LC)	PE		Gastrotheca monticola	FALSE	FALSE	FALSE	TRUE	FALSE	TRUE	FALSE	FALSE	FALSE	FALSE	TRUE	Gastrotheca monticola Barbour and Noble, 1920	1920
Anura	Hemiphractidae		Gastrotheca	peruana	Gastrotheca peruana			Gastrotheca peruana			Least Concern (LC)	PE		Gastrotheca peruana	TRUE	TRUE	TRUE	FALSE	FALSE	TRUE	FALSE	FALSE	FALSE	TRUE	TRUE	Gastrotheca peruana (Boulenger, 1900)	1900
Anura	Hemiphractidae		Gastrotheca	riobambae	Gastrotheca riobambae		Riobamba Marsupial Frog, Andean Marsupial Tree Frog	Gastrotheca riobambae			Endangered (EN)	EC		Gastrotheca riobambae	TRUE	TRUE	TRUE	FALSE	FALSE	TRUE	FALSE	FALSE	FALSE	FALSE	TRUE	Gastrotheca riobambae (Fowler, 1913)	1913
Anura	Microhylidae	Asterophryinae	Genyophryne	thomsoni	Genyophryne thomsoni		Thomson's toothless frog	Genyophryne thomsoni			Least Concern (LC)	PG		Genyophryne thomsoni	FALSE	FALSE	FALSE	TRUE	FALSE	TRUE	FALSE	FALSE	FALSE	FALSE	TRUE	Sphenophryne thomsoni (Boulenger, 1890)	1890
Anura	Myobatrachidae	Myobatrachinae	Geocrinia	laevis	Geocrinia laevis		Southern Smooth Froglet	Geocrinia laevis			Least Concern (LC)	AU		Geocrinia laevis	FALSE	FALSE	FALSE	FALSE	FALSE	FALSE	FALSE	FALSE	TRUE	FALSE	TRUE	Geocrinia laevis (Günther, 1864)	1864
Gymnophiona	Dermophiidae		Geotrypetes	seraphini	Geotrypetes seraphini		Gaboon caecilian	Geotrypetes seraphini			Least Concern (LC)	CM,CG,CD,CI,GQ,GA,GH,GN,LR,NG,SL		Geotrypetes seraphini	TRUE	TRUE	TRUE	TRUE	FALSE	TRUE	FALSE	FALSE	TRUE	TRUE	TRUE	Geotrypetes seraphini (Duméril, 1859)	1859
Anura	Microhylidae	Microhylinae	Glyphoglossus	guttulatus	Glyphoglossus guttulatus			Glyphoglossus guttulatus			Least Concern (LC)	LA,MY,MM,TH,VN		Glyphoglossus guttulatus	FALSE	FALSE	FALSE	FALSE	FALSE	FALSE	FALSE	FALSE	TRUE	TRUE	TRUE	Glyphoglossus guttulatus (Blyth, 1856)	1856
Anura	Microhylidae	Microhylinae	Glyphoglossus	molossus	Glyphoglossus molossus		Blunt-headed Burrowing Frog, Balloon Frog, Broad-lipped Frog	Glyphoglossus molossus			Near Threatened (NT)	KH,LA,MM,TH,VN		Glyphoglossus molossus	FALSE	FALSE	FALSE	FALSE	FALSE	FALSE	FALSE	FALSE	FALSE	TRUE	TRUE	Glyphoglossus molossus Günther, 1869	1869
Gymnophiona	Indotyphlidae		Grandisonia	alternans	Grandisonia alternans			Grandisonia alternans			Least Concern (LC)	SC		Grandisonia alternans	FALSE	FALSE	FALSE	TRUE	FALSE	TRUE	FALSE	FALSE	FALSE	FALSE	TRUE	Grandisonia alternans (Stejneger, 1893)	1893
Anura	Mantellidae	Mantellinae	Guibemantis	pulcher	Guibemantis pulcher	Pandanusicola		Guibemantis pulcher	Mantidactylus pulcher	Mantidactylus pulcher	Least Concern (LC)	MG		Guibemantis pulcher	FALSE	FALSE	FALSE	TRUE	FALSE	TRUE	FALSE	FALSE	TRUE	FALSE	TRUE	Guibemantis pulcher (Boulenger, 1882)	1882
Gymnophiona	Dermophiidae		Gymnopis	multiplicata	Gymnopis multiplicata			Gymnopis multiplicata			Least Concern (LC)	CR,GT,HN,NI,PA		Gymnopis multiplicata	TRUE	FALSE	TRUE	FALSE	FALSE	TRUE	FALSE	FALSE	FALSE	FALSE	TRUE	Gymnopis multiplicata Peters, 1874	1874
Caudata	Plethodontidae	Hemidactyliinae	Gyrinophilus	porphyriticus	Gyrinophilus porphyriticus		Spring Salamander, Blue Ridge Spring Salamander, Carolina Spring Salamander, Kentucky Spring Salamander, Northern Spring Salamander	Gyrinophilus porphyriticus			Least Concern (LC)	US,CA		Gyrinophilus porphyriticus	TRUE	TRUE	TRUE	TRUE	FALSE	TRUE	FALSE	FALSE	FALSE	FALSE	TRUE	Gyrinophilus porphyriticus (Green, 1827)	1827
Anura	Microhylidae	Gastrophryninae	Hamptophryne	boliviana	Hamptophryne boliviana			Hamptophryne boliviana			Least Concern (LC)	BO,BR,CO,EC,GF,GY,PE,SR		Hamptophryne boliviana	TRUE	FALSE	TRUE	FALSE	FALSE	TRUE	FALSE	FALSE	FALSE	FALSE	TRUE	Hamptophryne boliviana (Parker, 1927)	1927
Anura	Myobatrachidae	Limnodynastinae	Heleioporus	australiacus	Heleioporus australiacus		Giant Burrowing Frog, Eastern Owl Frog	Heleioporus australiacus			Vulnerable (VU)	AU		Heleioporus australiacus	FALSE	FALSE	FALSE	FALSE	FALSE	FALSE	FALSE	FALSE	TRUE	FALSE	TRUE	Heleioporus australiacus (Shaw and Nodder, 1795)	1795
Caudata	Plethodontidae	Hemidactyliinae	Hemidactylium	scutatum	Hemidactylium scutatum		Four-toed Salamander	Hemidactylium scutatum			Least Concern (LC)	US,CA		Hemidactylium scutatum	FALSE	FALSE	FALSE	TRUE	FALSE	TRUE	FALSE	FALSE	TRUE	FALSE	TRUE	Hemidactylium scutatum (Temminck, 1838)	1838
Anura	Hemiphractidae		Hemiphractus	fasciatus	Hemiphractus fasciatus			Hemiphractus fasciatus	Cerathyla fasciatus, Cerathyla panamensis, Hemiphractus panamensis	Cerathyla fasciatus, Cerathyla panamensis, Hemiphractus panamensis	Near Threatened (NT)	CO,EC,PA		Hemiphractus fasciatus	FALSE	FALSE	FALSE	TRUE	FALSE	TRUE	FALSE	FALSE	FALSE	FALSE	TRUE	Hemiphractus fasciatus Peters, 1862	1862
Anura	Hemisotidae		Hemisus	marmoratus	Hemisus marmoratus		Shovel-nosed frog, Marbled snout-burrower	Hemisus marmoratus			Least Concern (LC)	BJ,BW,BF,CM,CF,TD,ER,ET,GM,GH,GW,KE,MW,MZ,NA,NG,SN,SO,ZA,SS,SD,SZ,TZ,TG,ZM,ZW		Hemisus marmoratus	TRUE	FALSE	TRUE	TRUE	FALSE	TRUE	FALSE	FALSE	TRUE	TRUE	TRUE	Hemisus marmoratus (Peters, 1854)	1854
Gymnophiona	Herpelidae		Herpele	multiplicata	Herpele multiplicata		Victoria Caecilian	Herpele multiplicata			Data Deficient (DD)	CM		Herpele multiplicata	FALSE	FALSE	FALSE	TRUE	FALSE	TRUE	FALSE	FALSE	TRUE	FALSE	TRUE	Herpele multiplicata Nieden, 1912	1912
Gymnophiona	Herpelidae		Herpele	squalostoma	Herpele squalostoma		Congo Caecilian	Herpele squalostoma			Least Concern (LC)	CM,CF,CG,CD,GQ,GA,NG		Herpele squalostoma	FALSE	TRUE	TRUE	TRUE	FALSE	TRUE	FALSE	FALSE	TRUE	TRUE	TRUE	Herpele squalostoma (Stutchbury, 1836)	1836
Anura	Hyperoliidae		Heterixalus	alboguttatus	Heterixalus alboguttatus			Heterixalus alboguttatus			Least Concern (LC)	MG		Heterixalus alboguttatus	TRUE	TRUE	TRUE	TRUE	FALSE	TRUE	FALSE	FALSE	TRUE	TRUE	TRUE	Heterixalus alboguttatus (Boulenger, 1882)	1882
Anura	Hyperoliidae		Heterixalus	betsileo	Heterixalus betsileo			Heterixalus betsileo			Least Concern (LC)	MG		Heterixalus betsileo	FALSE	FALSE	FALSE	TRUE	FALSE	TRUE	FALSE	FALSE	TRUE	TRUE	TRUE	Heterixalus betsileo (Grandidier, 1872)	1872
Anura	Hyperoliidae		Heterixalus	boettgeri	Heterixalus boettgeri			Heterixalus boettgeri			Least Concern (LC)	MG		Heterixalus boettgeri	FALSE	TRUE	TRUE	TRUE	FALSE	TRUE	FALSE	FALSE	TRUE	TRUE	TRUE	Heterixalus boettgeri (Mocquard, 1902)	1902
Anura	Hyperoliidae		Heterixalus	madagascariensis	Heterixalus madagascariensis			Heterixalus madagascariensis			Least Concern (LC)	MG		Heterixalus madagascariensis	TRUE	TRUE	TRUE	TRUE	FALSE	TRUE	FALSE	FALSE	TRUE	TRUE	TRUE	Heterixalus madagascariensis (Duméril and Bibron, 1841)	1841
Anura	Hyperoliidae		Heterixalus	rutenbergi	Heterixalus rutenbergi			Heterixalus rutenbergi			Least Concern (LC)	MG		Heterixalus rutenbergi	FALSE	TRUE	TRUE	TRUE	FALSE	TRUE	FALSE	FALSE	TRUE	TRUE	TRUE	Heterixalus rutenbergi (Boettger, 1881)	1881
Anura	Hyperoliidae		Heterixalus	tricolor	Heterixalus tricolor			Heterixalus tricolor			Least Concern (LC)	MG		Heterixalus tricolor	FALSE	FALSE	FALSE	TRUE	FALSE	TRUE	FALSE	FALSE	TRUE	FALSE	TRUE	Heterixalus tricolor (Boettger, 1881)	1881
Anura	Ptychadenidae		Hildebrandtia	ornata	Hildebrandtia ornata		Ornate frog	Hildebrandtia ornata			Least Concern (LC)	AO,BJ,BW,CM,CF,TD,CD,CI,GM,GH,KE,MW,ML,MZ,NA,NG,SN,SO,ZA,SS,SZ,TZ,TG,UG,ZM,ZW		Hildebrandtia ornata	FALSE	FALSE	FALSE	FALSE	FALSE	FALSE	FALSE	FALSE	TRUE	TRUE	TRUE	Hildebrandtia ornata (Peters, 1878)	1878
Anura	Dicroglossidae	Dicroglossinae	Hoplobatrachus	crassus	Hoplobatrachus crassus		Jerdon`s Bullfrog	Hoplobatrachus crassus			Least Concern (LC)	BD,LK,NP,IN		Hoplobatrachus crassus	FALSE	FALSE	FALSE	FALSE	FALSE	FALSE	FALSE	FALSE	FALSE	TRUE	TRUE	Hoplobatrachus crassus (Jerdon, 1853)	1853
Anura	Dicroglossidae	Dicroglossinae	Hoplobatrachus	occipitalis	Hoplobatrachus occipitalis		Crowned bullfrog	Hoplobatrachus occipitalis			Least Concern (LC)	DZ,AO,BJ,BF,BI,CM,CF,TD,CG,CD,ER,ET,GA,GM,GH,GN,GW,KE,LR,ML,MR,MA,MZ,NE,NG,RW,SN,SL,SS,SD,TZ,TG,UG,ZM		Hoplobatrachus occipitalis	TRUE	FALSE	TRUE	TRUE	FALSE	TRUE	FALSE	FALSE	TRUE	TRUE	TRUE	Hoplobatrachus occipitalis (Günther, 1858)	1858
Anura	Dicroglossidae	Dicroglossinae	Hoplobatrachus	rugulosus	Hoplobatrachus rugulosus		Asian Rugose Bullfrog	Hoplobatrachus rugulosus	Hoplobatrachus chinensis, Rana chinensis, Rana rugulosa	Hoplobatrachus chinensis, Rana chinensis, Rana rugulosa	Least Concern (LC)	KH,CN,HK,LA,MO,MY,MM,PH,TW,TH,VN		Hoplobatrachus rugulosus	FALSE	FALSE	FALSE	TRUE	FALSE	TRUE	FALSE	FALSE	TRUE	FALSE	TRUE	Hoplobatrachus rugulosus (Wiegmann, 1834)	1834
Anura	Dicroglossidae	Dicroglossinae	Hoplobatrachus	tigerinus	Hoplobatrachus tigerinus		Indus Valley Bullfrog	Hoplobatrachus tigerinus	Bufo typhonius	Bufo typhonius	Least Concern (LC)	AF,BD,BT,IN,MG,MV,MM,NP,PK,LK		Hoplobatrachus tigerinus	TRUE	TRUE	TRUE	TRUE	TRUE	TRUE	TRUE	II	TRUE	TRUE	TRUE	Hoplobatrachus tigerinus (Daudin, 1802)	1802
Anura	Ranidae		Huia	cavitympanum	Huia cavitympanum		Hole-in-the-head Frog	Huia cavitympanum			Least Concern (LC)	ID,MY		Huia cavitympanum	FALSE	FALSE	FALSE	FALSE	FALSE	FALSE	FALSE	FALSE	FALSE	TRUE	TRUE	Huia cavitympanum (Boulenger, 1893)	1893
Anura	Centrolenidae	Hyalinobatrachinae	Hyalinobatrachium	aureoguttatum	Hyalinobatrachium aureoguttatum		Sun Glassfrog, Rana de Cristal del Sol	Hyalinobatrachium aureoguttatum			Near Threatened (NT)	CO,EC,PA		Hyalinobatrachium aureoguttatum	TRUE	TRUE	TRUE	FALSE	FALSE	TRUE	FALSE	FALSE	FALSE	FALSE	TRUE	Hyalinobatrachium aureoguttatum (Barrera-Rodriguez and Ruiz-Carranza, 1989)	1989
Anura	Centrolenidae	Hyalinobatrachinae	Hyalinobatrachium	colymbiphyllum	Hyalinobatrachium colymbiphyllum			Hyalinobatrachium colymbiphyllum	Hyalinobatrachium crybetes, Centrolenella colymbiphyllum, Cochranella colymbiphyllum	Hyalinobatrachium crybetes, Centrolenella colymbiphyllum, Cochranella colymbiphyllum	Least Concern (LC)	CO,CR,HN,PA		Hyalinobatrachium colymbiphyllum	FALSE	FALSE	FALSE	TRUE	FALSE	TRUE	FALSE	FALSE	FALSE	FALSE	TRUE	Hyalinobatrachium colymbiphyllum (Taylor, 1949)	1949
Anura	Centrolenidae	Hyalinobatrachinae	Hyalinobatrachium	fleischmanni	Hyalinobatrachium fleischmanni		Fleischmann's glass frog, Ranita de Vidrio, Rana de Cristal de Fleischmann	Hyalinobatrachium fleischmanni	Centrolenella fleischmanni	Centrolenella fleischmanni	Least Concern (LC)	CR,SV,HN,NI		Hyalinobatrachium fleischmanni	TRUE	TRUE	TRUE	TRUE	FALSE	TRUE	FALSE	FALSE	TRUE	FALSE	TRUE	Hyalinobatrachium fleischmanni (Boettger, 1893)	1893
Anura	Centrolenidae	Hyalinobatrachinae	Hyalinobatrachium	petersi	Hyalinobatrachium petersi		Powdered Glass Frog, Chiriqui Glass Frog		Hyalinobatrachium pulveratum, Cochranella pulverata	Hyalinobatrachium pulveratum, Cochranella pulverata	NA	CO		Hyalinobatrachium petersi	TRUE	FALSE	TRUE	FALSE	FALSE	TRUE	FALSE	FALSE	FALSE	FALSE	TRUE	Peters, 1873	1873
Anura	Centrolenidae	Hyalinobatrachinae	Hyalinobatrachium	valerioi	Hyalinobatrachium valerioi		Reticulated Glass Frog, Valerio's Glass Frog, La Palma Glass Frog, Ranita de Vidrio,Rana de Cristal Reticulada, Rana de Cristal de Valerio	Hyalinobatrachium valerioi			Least Concern (LC)	EC,CO,PA,CR		Hyalinobatrachium valerioi	TRUE	TRUE	TRUE	FALSE	FALSE	TRUE	FALSE	FALSE	TRUE	FALSE	TRUE	Hyalinobatrachium valerioi (Dunn, 1931)	1931
Anura	Centrolenidae	Hyalinobatrachinae	Hyalinobatrachium	vireovittatum	Hyalinobatrachium vireovittatum		Starrett's Glass Frog	Hyalinobatrachium vireovittatum			Data Deficient (DD)	CR,PA		Hyalinobatrachium vireovittatum	FALSE	FALSE	FALSE	TRUE	FALSE	TRUE	FALSE	FALSE	FALSE	FALSE	TRUE	Hyalinobatrachium vireovittatum (Starrett and Savage, 1973)	1973
Caudata	Plethodontidae	Plethodontinae	Hydromantes	brunus	Hydromantes brunus	Hydromantes	Limestone Salamander	Hydromantes brunus			Vulnerable (VU)	US		Hydromantes brunus	FALSE	FALSE	FALSE	TRUE	FALSE	TRUE	FALSE	FALSE	FALSE	FALSE	TRUE	Hydromantes brunus Gorman, 1954	1954
Caudata	Plethodontidae	Plethodontinae	Hydromantes	flavus	Hydromantes flavus	Speleomantes	Monte Albo Cave Salamander, Monte Albo HÃÂ¶lensalamander, Kollakoopaojalik, SpÃÂ©lÃÂ¨rpes du Monte Albo, Geotritone del Monte Albo, gele grottensalamander	Speleomantes flavus	Speleomantes flavus		Vulnerable (VU)	IT		Hydromantes flavus	FALSE	FALSE	FALSE	TRUE	FALSE	TRUE	FALSE	FALSE	FALSE	FALSE	TRUE	Speleomantes flavus (Stefani, 1969)	1969
Caudata	Plethodontidae	Plethodontinae	Hydromantes	imperialis	Hydromantes imperialis	Speleomantes	Imperial Cave Salamander, Duftender HÃÂ¶hlensalamander, Kuningkoopaojalik, SpÃÂ©lerpÃÂ¨s impÃÂ©rial, Geotritone imperiale, Geotritone oderoso	Speleomantes imperialis	Speleomantes imperialis		Near Threatened (NT)	IT		Hydromantes imperialis	FALSE	FALSE	FALSE	TRUE	FALSE	TRUE	FALSE	FALSE	FALSE	FALSE	TRUE	Speleomantes imperialis (Stefani, 1969)	1969
Caudata	Plethodontidae	Plethodontinae	Hydromantes	shastae	Hydromantes shastae	Hydromantes	Shasta Salamander	Hydromantes shastae			Vulnerable (VU)	US	This species was divided into three species by Bingham et al. 2018 Bulletin of the Museum of Comparative Zoology 161:403-427 (https://mczbase.mcz.harvard.edu/specimen_images/publications/Bulletin_161_10.pdf). See accounts of Hydromantes samweli and Hydro	Hydromantes shastae	FALSE	FALSE	FALSE	TRUE	FALSE	TRUE	FALSE	FALSE	FALSE	FALSE	TRUE	Hydromantes shastae Gorman and Camp, 1953	1953
Anura	Hylidae	Hylinae	Hyla	annectans	Hyla annectans	Hyla		Hyla annectans			Least Concern (LC)	BT,CN,IN,MM,TH,VN	Duellman et al. (Zootaxa 2016) treated two major clades as genera; AmphibiaWeb treats these two clades as subgenera(Hyla in the Old World; Dryophytes in the New World and East Asia), thus stabilizing traditional taxonomy.	Hyla annectans	FALSE	FALSE	FALSE	FALSE	FALSE	FALSE	FALSE	FALSE	FALSE	TRUE	TRUE	Hyla annectans (Jerdon, 1870)	1870
Anura	Hylidae	Hylinae	Hyla	arborea	Hyla arborea	Hyla	Common Tree Frog	Hyla arborea			Least Concern (LC)	AL,AM,AT,AZ,BY,BE,BA,BG,HR,CZ,DK,FR,GE,DE,GR,HU,IL,IT,LI,LT,LU,MK,MD,ME,NL,PL,PT,RO,RU,RS,SK,SI,ES,SE,CH,TR,UA,GB	Duellman et al. (Zootaxa 2016) treated two major clades as genera; AmphibiaWeb treats these two clades as subgenera(Hyla in the Old World; Dryophytes in the New World and East Asia), thus stabilizing traditional taxonomy.	Hyla arborea	TRUE	TRUE	TRUE	TRUE	FALSE	TRUE	FALSE	FALSE	TRUE	TRUE	TRUE	Hyla arborea (Linnaeus, 1758)	1758
Anura	Hylidae	Hylinae	Hyla	arenicolor	Hyla arenicolor	Dryophytes	Canyon Treefrog	Dryophytes arenicolor	Dryophytes arenicolor		Least Concern (LC)	US,MX	Duellman et al. (Zootaxa 2016) treated two major clades as genera; AmphibiaWeb treats these two clades as subgenera(Hyla in the Old World; Dryophytes in the New World and East Asia), thus stabilizing traditional taxonomy.	Hyla arenicolor	TRUE	FALSE	TRUE	TRUE	FALSE	TRUE	FALSE	FALSE	FALSE	FALSE	TRUE	Dryophytes arenicolor (Cope, 1866)	1866
Anura	Hylidae	Hylinae	Hyla	chinensis	Hyla chinensis	Hyla	Chinese Tree Toad	Hyla chinensis			Least Concern (LC)	VN,TW,CN	Duellman et al. (Zootaxa 2016) treated two major clades as genera; AmphibiaWeb treats these two clades as subgenera(Hyla in the Old World; Dryophytes in the New World and East Asia), thus stabilizing traditional taxonomy.	Hyla chinensis	TRUE	TRUE	TRUE	TRUE	FALSE	TRUE	FALSE	FALSE	TRUE	FALSE	TRUE	Hyla chinensis Günther, 1858	1858
Anura	Hylidae	Hylinae	Hyla	chrysoscelis	Hyla chrysoscelis	Dryophytes	Cope's Gray Treefrog	Dryophytes chrysoscelis	Dryophytes chrysoscelis		Least Concern (LC)	US	Duellman et al. (Zootaxa 2016) treated two major clades as genera; AmphibiaWeb treats these two clades as subgenera(Hyla in the Old World; Dryophytes in the New World and East Asia), thus stabilizing traditional taxonomy.	Hyla chrysoscelis	TRUE	FALSE	TRUE	TRUE	FALSE	TRUE	FALSE	FALSE	FALSE	FALSE	TRUE	Dryophytes chrysoscelis (Cope, 1880)	1880
Anura	Hylidae	Hylinae	Hyla	cinerea	Hyla cinerea	Dryophytes	North American Green Treefrog, Green Treefrog	Dryophytes cinereus	Dryophytes cinereus, Calamita cinereus	Calamita cinereus	Least Concern (LC)	PR,US	Duellman et al. (Zootaxa 2016) treated two major clades as genera; AmphibiaWeb treats these two clades as subgenera(Hyla in the Old World; Dryophytes in the New World and East Asia), thus stabilizing traditional taxonomy.	Hyla cinerea	TRUE	TRUE	TRUE	TRUE	FALSE	TRUE	FALSE	FALSE	TRUE	TRUE	TRUE	Schneider, 1799	1799
Anura	Hylidae	Hylinae	Hyla	femoralis	Hyla femoralis	Dryophytes	Pine Woods Treefrog	Dryophytes femoralis	Dryophytes femoralis		Least Concern (LC)	US	Duellman et al. (Zootaxa 2016) treated two major clades as genera; AmphibiaWeb treats these two clades as subgenera(Hyla in the Old World; Dryophytes in the New World and East Asia), thus stabilizing traditional taxonomy.	Hyla femoralis	TRUE	TRUE	TRUE	FALSE	FALSE	TRUE	FALSE	FALSE	FALSE	FALSE	TRUE	Dryophytes femoralis (Daudin, 1800)	1800
Anura	Hylidae	Hylinae	Hyla	gratiosa	Hyla gratiosa	Dryophytes	Barking Treefrog	Dryophytes gratiosus	Dryophytes gratiosus		Least Concern (LC)	US	Duellman et al. (Zootaxa 2016) treated two major clades as genera; AmphibiaWeb treats these two clades as subgenera(Hyla in the Old World; Dryophytes in the New World and East Asia), thus stabilizing traditional taxonomy.	Hyla gratiosa	TRUE	TRUE	TRUE	TRUE	FALSE	TRUE	FALSE	FALSE	TRUE	TRUE	TRUE	Cardioglossa gratiosa Amiet, 1972	1972
Anura	Hylidae	Hylinae	Hyla	intermedia	Hyla intermedia	Hyla		Hyla intermedia			Least Concern (LC)	IT	Duellman et al. (Zootaxa 2016) treated two major clades as genera; AmphibiaWeb treats these two clades as subgenera(Hyla in the Old World; Dryophytes in the New World and East Asia), thus stabilizing traditional taxonomy.	Hyla intermedia	FALSE	FALSE	FALSE	FALSE	FALSE	FALSE	FALSE	FALSE	TRUE	FALSE	TRUE	Hyla intermedia Boulenger, 1882	1882
Anura	Hylidae	Hylinae	Hyla	japonica	Hyla japonica	Dryophytes	Japanese Tree Frog	Dryophytes japonicus	Hyla ussuriensis, Dryophytes japonicus, Hyla stepheni	Hyla stepheni	Least Concern (LC)	MN,JP,KR,KP,RU,CN	Duellman et al. (Zootaxa 2016) treated two major clades as genera; AmphibiaWeb treats these two clades as subgenera(Hyla in the Old World; Dryophytes in the New World and East Asia), thus stabilizing traditional taxonomy.	Hyla japonica	TRUE	TRUE	TRUE	FALSE	FALSE	TRUE	FALSE	FALSE	TRUE	FALSE	TRUE	Günther, 1859	1859
Anura	Hylidae	Hylinae	Hyla	meridionalis	Hyla meridionalis	Hyla	Mediterranean Tree Frog, Stripeless Tree Frog, Reineta meridional, Ustribet lÃÂ¸vfrÃÂ¸, Mittelmeer laubfrosch, Vahemere lehekonn, Ranita meridional, Hegoaldeka zuhaitz-igela, Rainette mÃÂ©ridionale, RÃÂ¢, Raganella meridionale, Ragane	Hyla meridionalis			Least Concern (LC)	DZ,FR,IT,MC,MA,PT,ES,TN	Duellman et al. (Zootaxa 2016) treated two major clades as genera; AmphibiaWeb treats these two clades as subgenera(Hyla in the Old World; Dryophytes in the New World and East Asia), thus stabilizing traditional taxonomy.	Hyla meridionalis	FALSE	TRUE	TRUE	FALSE	FALSE	TRUE	FALSE	FALSE	FALSE	FALSE	TRUE	Hyla meridionalis Boettger, 1874	1874
Anura	Hylidae	Hylinae	Hyla	savignyi	Hyla savignyi	Hyla	Lemon-Yellow Tree Frog	Hyla savignyi			Least Concern (LC)	CY,EG,GE,IR,IQ,IL,JO,LB,SY,TR	Duellman et al. (Zootaxa 2016) treated two major clades as genera; AmphibiaWeb treats these two clades as subgenera(Hyla in the Old World; Dryophytes in the New World and East Asia), thus stabilizing traditional taxonomy.	Hyla savignyi	TRUE	FALSE	TRUE	FALSE	FALSE	TRUE	FALSE	FALSE	FALSE	FALSE	TRUE	Hyla savignyi Audouin, 1827	1827
Anura	Hylidae	Hylinae	Hyla	squirella	Hyla squirella	Dryophytes	Squirrel Treefrog	Dryophytes squirellus	Dryophytes squirellus		Least Concern (LC)	BS,US	Duellman et al. (Zootaxa 2016) treated two major clades as genera; AmphibiaWeb treats these two clades as subgenera(Hyla in the Old World; Dryophytes in the New World and East Asia), thus stabilizing traditional taxonomy.	Hyla squirella	TRUE	TRUE	TRUE	TRUE	FALSE	TRUE	FALSE	FALSE	FALSE	FALSE	TRUE	Dryophytes squirellus (Daudin, 1800)	1800
Anura	Hylidae	Hylinae	Hyla	versicolor	Hyla versicolor	Dryophytes	Eastern Gray Treefrog	Dryophytes versicolor	Dryophytes versicolor		Least Concern (LC)	CA,US	Duellman et al. (Zootaxa 2016) treated two major clades as genera; AmphibiaWeb treats these two clades as subgenera(Hyla in the Old World; Dryophytes in the New World and East Asia), thus stabilizing traditional taxonomy.	Hyla versicolor	TRUE	TRUE	TRUE	TRUE	FALSE	TRUE	FALSE	FALSE	TRUE	TRUE	TRUE	Dryophytes versicolor (LeConte, 1825)	1825
Anura	Ranidae		Hylarana	erythraea	Hylarana erythraea		Green Paddy Frog, Common Green Frog, Leaf Frog	Hylarana erythraea	Rana erythraea	Rana erythraea	Least Concern (LC)	BN,KH,IN,ID,LA,MY,MM,PH,SG,TH,VN		Hylarana erythraea	TRUE	TRUE	TRUE	TRUE	FALSE	TRUE	FALSE	FALSE	TRUE	TRUE	TRUE	Hylarana erythraea (Schlegel, 1837)	1837
Anura	Ranidae		Hylarana	montivaga	Hylarana montivaga			Hylarana montivaga	Rana montivaga	Rana montivaga	Endangered (EN)	VN,LA	While not formally treated by Oliver LA, Prendini E, Kraus F, Raxworthy CJ 2015 Systematics and biogeography of the Hylarana frog (Anura: Ranidae) radiation across tropical Australasia, Southeast Asia, and Africa. Mol Phylog Evol 90: 176-192, this	Hylarana montivaga	FALSE	FALSE	FALSE	FALSE	FALSE	FALSE	FALSE	FALSE	FALSE	TRUE	TRUE	"Hylarana" montivaga (Smith, 1921)	1921
Anura	Ranidae		Hylarana	taipehensis	Hylarana taipehensis		Taipei frog	Hylarana taipehensis	Rana taipehensis	Rana taipehensis	Least Concern (LC)	BD,BT,KH,CN,HK,IN,LA,MM,TW,TH,VN		Hylarana taipehensis	FALSE	FALSE	FALSE	TRUE	FALSE	TRUE	FALSE	FALSE	FALSE	FALSE	TRUE	Hylarana taipehensis (Van Denburgh, 1909)	1909
Anura	Ranidae		Hylarana	tytleri	Hylarana tytleri			Hylarana tytleri	Rana tytleri	Rana tytleri	Least Concern (LC)	BD,IN,NP		Hylarana tytleri	FALSE	FALSE	FALSE	FALSE	FALSE	FALSE	FALSE	FALSE	FALSE	TRUE	TRUE	Hylarana tytleri Theobald, 1868	1868
Anura	Hylidae	Hylinae	Hyliola	regilla	Hyliola regilla		Pacific Treefrog, Pacific Chorus Frog	Pseudacris regilla	Pseudacris regilla, Hyla regilla	Hyla regilla	Least Concern (LC)	US,MX,CA	Duellman and colleagues (http://doi.org/10.11646/zootaxa.4104.1.1) propose resurrecting the unused name Hyliola for western tree frogs (Pseudacris regilla and cadaverina). The western species have been in Pseudacris for only 10 years, so the least d	Hyliola regilla	TRUE	FALSE	TRUE	FALSE	FALSE	TRUE	FALSE	FALSE	TRUE	TRUE	TRUE	Pseudacris regilla (Baird and Girard, 1852)	1852
Anura	Hylodidae		Hylodes	phyllodes	Hylodes phyllodes			Hylodes phyllodes			Least Concern (LC)	BR		Hylodes phyllodes	FALSE	FALSE	FALSE	TRUE	FALSE	TRUE	FALSE	FALSE	FALSE	FALSE	TRUE	Hylodes phyllodes Heyer and Cocroft, 1986	1986
Anura	Microhylidae	Asterophryinae	Hylophorbus	rufescens	Hylophorbus rufescens			Hylophorbus rufescens			Least Concern (LC)	PG,ID		Hylophorbus rufescens	FALSE	FALSE	FALSE	TRUE	FALSE	TRUE	FALSE	FALSE	FALSE	FALSE	TRUE	Hylophorbus rufescens Macleay, 1878	1878
Anura	Hylidae	Hylinae	Hyloscirtus	colymba	Hyloscirtus colymba			Hyloscirtus colymba	Hyla colymba	Hyla colymba	Near Threatened (NT)	PA,CR		Hyloscirtus colymba	FALSE	FALSE	FALSE	TRUE	FALSE	TRUE	FALSE	FALSE	FALSE	FALSE	TRUE	Hyloscirtus colymba (Dunn, 1931)	1931
Anura	Hylidae	Hylinae	Hyloscirtus	palmeri	Hyloscirtus palmeri			Hyloscirtus palmeri	Hyla palmeri	Hyla palmeri	Least Concern (LC)	CO,CR,EC,PA		Hyloscirtus palmeri	FALSE	FALSE	FALSE	TRUE	FALSE	TRUE	FALSE	FALSE	FALSE	FALSE	TRUE	Hyloscirtus palmeri (Boulenger, 1908)	1908
Anura	Dendrobatidae	Hyloxalinae	Hyloxalus	azureiventris	Hyloxalus azureiventris		Sky Blue Poison Dart Frog	Hyloxalus azureiventris	Cryptophyllobates azureiventris	Cryptophyllobates azureiventris	Endangered (EN)	PE		Hyloxalus azureiventris	TRUE	TRUE	TRUE	TRUE	TRUE	TRUE	TRUE	II	TRUE	TRUE	TRUE	Hyloxalus azureiventris (Kneller and Henle, 1985)	1985
Anura	Pipidae		Hymenochirus	boettgeri	Hymenochirus boettgeri		Zaire Dwarf Clawed Frog	Hymenochirus boettgeri			Least Concern (LC)	CM,CD,GA,NG		Hymenochirus boettgeri	TRUE	FALSE	TRUE	TRUE	FALSE	TRUE	FALSE	FALSE	TRUE	TRUE	TRUE	Hymenochirus boettgeri (Tornier, 1896)	1896
Anura	Pipidae		Hymenochirus	boulengeri	Hymenochirus boulengeri			Hymenochirus boulengeri			Data Deficient (DD)	CD		Hymenochirus boulengeri	FALSE	FALSE	FALSE	TRUE	FALSE	TRUE	FALSE	FALSE	TRUE	FALSE	TRUE	Hymenochirus boulengeri De Witte, 1930	1930
Anura	Pipidae		Hymenochirus	curtipes	Hymenochirus curtipes			Hymenochirus curtipes			Least Concern (LC)	CG		Hymenochirus curtipes	TRUE	FALSE	TRUE	TRUE	FALSE	TRUE	FALSE	FALSE	TRUE	TRUE	TRUE	Hymenochirus curtipes Noble, 1924	1924
Caudata	Hynobiidae	Hynobiinae	Hynobius	abei	Hynobius abei	Hynobius	Abe's Salamander, Abe Sansho-uo	Hynobius abei			Critically Endangered (CR)	JP		Hynobius abei	FALSE	FALSE	FALSE	FALSE	FALSE	FALSE	FALSE	FALSE	FALSE	TRUE	TRUE	Hynobius abei Sato, 1934	1934
Caudata	Hynobiidae	Hynobiinae	Hynobius	amjiensis	Hynobius amjiensis	Hynobius	Anji Salamander	Hynobius amjiensis			Critically Endangered (CR)	CN		Hynobius amjiensis	FALSE	FALSE	FALSE	FALSE	TRUE	TRUE	TRUE	III	FALSE	FALSE	TRUE	Hynobius amjiensis Gu, 1992	1992
Caudata	Hynobiidae	Hynobiinae	Hynobius	boulengeri	Hynobius boulengeri	Hynobius	Odaigahara Salamander	Hynobius boulengeri			Vulnerable (VU)	JP		Hynobius boulengeri	TRUE	FALSE	TRUE	FALSE	FALSE	TRUE	FALSE	FALSE	FALSE	TRUE	TRUE	Hynobius boulengeri (Thompson, 1912)	1912
Caudata	Hynobiidae	Hynobiinae	Hynobius	chinensis	Hynobius chinensis	Hynobius	Chinese Salamander	Hynobius chinensis			Endangered (EN)	CN		Hynobius chinensis	FALSE	FALSE	FALSE	FALSE	FALSE	FALSE	FALSE	FALSE	FALSE	TRUE	TRUE	Hynobius chinensis Günther, 1889	1889
Caudata	Hynobiidae	Hynobiinae	Hynobius	dunni	Hynobius dunni	Hynobius	Oita Salamander, Oita Sansho-uo	Hynobius dunni			Endangered (EN)	JP	The Shikoku population long assigned to this species was described in 2018 as a distinct and unrelated species Hynobius tosashimizuensis.	Hynobius dunni	TRUE	TRUE	TRUE	FALSE	FALSE	TRUE	FALSE	FALSE	FALSE	TRUE	TRUE	Hynobius dunni Tago, 1931	1931
Caudata	Hynobiidae	Hynobiinae	Hynobius	hidamontanus	Hynobius hidamontanus	Hynobius	Hakuba Salamander	Hynobius hidamontanus	Hynobius tenuis		Endangered (EN)	JP		Hynobius hidamontanus	FALSE	FALSE	FALSE	FALSE	FALSE	FALSE	FALSE	FALSE	FALSE	TRUE	TRUE	Hynobius hidamontanus Matsui, 1987	1987
Caudata	Hynobiidae	Hynobiinae	Hynobius	ikioi	Hynobius ikioi		Amber-colored salamander; Bekko-sansyou-uwo				NA	JP		Hynobius ikioi	FALSE	FALSE	FALSE	FALSE	FALSE	FALSE	FALSE	FALSE	FALSE	TRUE	TRUE	Hynobius ikioi Matsui, Nishikawa, and Tominaga, 2017	2017
Caudata	Hynobiidae	Hynobiinae	Hynobius	kimurae	Hynobius kimurae	Hynobius	Hida Salamander	Hynobius kimurae			Least Concern (LC)	JP		Hynobius kimurae	TRUE	TRUE	TRUE	FALSE	FALSE	TRUE	FALSE	FALSE	TRUE	FALSE	TRUE	Hynobius kimurae Dunn, 1923	1923
Caudata	Hynobiidae	Hynobiinae	Hynobius	leechii	Hynobius leechii	Hynobius	Northeastern China Hynobiid Salamander	Hynobius leechii	Hynobius mantchuricus		Least Concern (LC)	CN,KP,KR		Hynobius leechii	FALSE	TRUE	TRUE	FALSE	FALSE	TRUE	FALSE	FALSE	FALSE	FALSE	TRUE	Hynobius leechii Boulenger, 1887	1887
Caudata	Hynobiidae	Hynobiinae	Hynobius	maoershanensis	Hynobius maoershanensis	Hynobius		Hynobius maoershanensis			Data Deficient (DD)	CN		Hynobius maoershanensis	FALSE	FALSE	FALSE	FALSE	FALSE	FALSE	FALSE	FALSE	FALSE	TRUE	TRUE	Hynobius maoershanensis Zhou, Jiang, and Jiang, 2006	2006
Caudata	Hynobiidae	Hynobiinae	Hynobius	nebulosus	Hynobius nebulosus	Hynobius	Misty Salamander, Kasumi Sansho-uo, Clouded Salamander	Hynobius nebulosus			Least Concern (LC)	JP		Hynobius nebulosus	FALSE	FALSE	FALSE	FALSE	FALSE	FALSE	FALSE	FALSE	FALSE	TRUE	TRUE	Hynobius nebulosus (Temminck and Schlegel, 1838)	1838
Caudata	Hynobiidae	Hynobiinae	Hynobius	nigrescens	Hynobius nigrescens	Hynobius	Black Salamander, Kuro Sansho-uo	Hynobius nigrescens			Least Concern (LC)	JP		Hynobius nigrescens	TRUE	FALSE	TRUE	FALSE	FALSE	TRUE	FALSE	FALSE	FALSE	FALSE	TRUE	Hynobius nigrescens Stejneger, 1907	1907
Caudata	Hynobiidae	Hynobiinae	Hynobius	retardatus	Hynobius retardatus	Satobius	Hokkaido Salamander, Ezo Sansho-uo	Hynobius retardatus			Least Concern (LC)	JP		Hynobius retardatus	FALSE	TRUE	TRUE	FALSE	FALSE	TRUE	FALSE	FALSE	FALSE	FALSE	TRUE	Hynobius retardatus Dunn, 1923	1923
Caudata	Hynobiidae	Hynobiinae	Hynobius	tokyoensis	Hynobius tokyoensis	Hynobius	Tokyo Salamander	Hynobius tokyoensis			Vulnerable (VU)	JP		Hynobius tokyoensis	FALSE	FALSE	FALSE	FALSE	FALSE	FALSE	FALSE	FALSE	TRUE	TRUE	TRUE	Hynobius tokyoensis Tago, 1931	1931
Caudata	Hynobiidae	Hynobiinae	Hynobius	yiwuensis	Hynobius yiwuensis	Hynobius	Yiwu hynobiid	Hynobius yiwuensis			Vulnerable (VU)	CN		Hynobius yiwuensis	FALSE	FALSE	FALSE	FALSE	FALSE	FALSE	FALSE	FALSE	FALSE	TRUE	TRUE	Hynobius yiwuensis Cai, 1985	1985
Anura	Hyperoliidae		Hyperolius	argus	Hyperolius argus			Hyperolius argus			Least Concern (LC)	ZA,MZ,TZ,KE,SO		Hyperolius argus	TRUE	TRUE	TRUE	TRUE	FALSE	TRUE	FALSE	FALSE	TRUE	TRUE	TRUE	Hyperolius argus Peters, 1854	1854
Anura	Hyperoliidae		Hyperolius	bolifambae	Hyperolius bolifambae			Hyperolius bolifambae			Least Concern (LC)	CM,CF,CD,GA,NG		Hyperolius bolifambae	TRUE	FALSE	TRUE	TRUE	FALSE	TRUE	FALSE	FALSE	FALSE	FALSE	TRUE	Hyperolius bolifambae Mertens, 1938	1938
Anura	Hyperoliidae		Hyperolius	castaneus	Hyperolius castaneus			Hyperolius castaneus			Least Concern (LC)	UG,BI,RW,CD		Hyperolius castaneus	FALSE	FALSE	FALSE	TRUE	FALSE	TRUE	FALSE	FALSE	FALSE	FALSE	TRUE	Hyperolius castaneus Ahl, 1931	1931
Anura	Hyperoliidae		Hyperolius	cinnamomeoventris	Hyperolius cinnamomeoventris		Cinnamon-bellied Reed Frog	Hyperolius cinnamomeoventris			Least Concern (LC)	AO,CM,CG,CD,GQ,GA,KE,RW,TZ,UG,ZM		Hyperolius cinnamomeoventris	FALSE	TRUE	TRUE	TRUE	FALSE	TRUE	FALSE	FALSE	FALSE	FALSE	TRUE	Hyperolius cinnamomeoventris Bocage, 1866	1866
Anura	Hyperoliidae		Hyperolius	concolor	Hyperolius concolor			Hyperolius concolor			Least Concern (LC)	BJ,CM,CI,GH,LR,NG,SL,TG		Hyperolius concolor	TRUE	TRUE	TRUE	TRUE	FALSE	TRUE	FALSE	FALSE	TRUE	TRUE	TRUE	Hyperolius concolor (Hallowell, 1844)	1844
Anura	Hyperoliidae		Hyperolius	fusciventris	Hyperolius fusciventris			Hyperolius fusciventris			Least Concern (LC)	BJ,CM,CI,GH,GN,LR,NG,SL		Hyperolius fusciventris	TRUE	TRUE	TRUE	TRUE	FALSE	TRUE	FALSE	FALSE	TRUE	FALSE	TRUE	Hyperolius fusciventris Peters, 1876	1876
Anura	Hyperoliidae		Hyperolius	guttulatus	Hyperolius guttulatus			Hyperolius guttulatus			Least Concern (LC)	CM,CI,GA,GH,GN,LR,NG,SL		Hyperolius guttulatus	TRUE	TRUE	TRUE	TRUE	FALSE	TRUE	FALSE	FALSE	TRUE	FALSE	TRUE	Hyperolius guttulatus Günther, 1858	1858
Anura	Hyperoliidae		Hyperolius	kivuensis	Hyperolius kivuensis		Kivu Reed Frog	Hyperolius kivuensis			Least Concern (LC)	AO,BI,CD,ET,KE,MW,SS,TZ,UG,ZM		Hyperolius kivuensis	FALSE	FALSE	FALSE	TRUE	FALSE	TRUE	FALSE	FALSE	FALSE	FALSE	TRUE	Hyperolius kivuensis Ahl, 1931	1931
Anura	Hyperoliidae		Hyperolius	langi	Hyperolius langi			Hyperolius langi			Least Concern (LC)	CD		Hyperolius langi	FALSE	FALSE	FALSE	TRUE	FALSE	TRUE	FALSE	FALSE	FALSE	FALSE	TRUE	Hyperolius langi Noble, 1924	1924
Anura	Hyperoliidae		Hyperolius	marmoratus	Hyperolius marmoratus		Painted Reed Frog	Hyperolius marmoratus			Least Concern (LC)	GA,KE,MZ,ZA,SZ,TZ,ZW		Hyperolius marmoratus	TRUE	TRUE	TRUE	TRUE	FALSE	TRUE	FALSE	FALSE	TRUE	TRUE	TRUE	Hyperolius marmoratus Rapp, 1842	1842
Anura	Hyperoliidae		Hyperolius	mitchelli	Hyperolius mitchelli		Mitchell's Reed Frog	Hyperolius mitchelli			Least Concern (LC)	MW,MZ,TZ		Hyperolius mitchelli	TRUE	TRUE	TRUE	FALSE	FALSE	TRUE	FALSE	FALSE	TRUE	FALSE	TRUE	Hyperolius mitchelli Loveridge, 1953	1953
Anura	Hyperoliidae		Hyperolius	nasutus	Hyperolius nasutus		Long Reed Frog	Hyperolius nasutus	Hyperolius punctulatus		Least Concern (LC)	AO,BJ,BW,BI,CM,CD,CI,ET,GH,KE,MW,MZ,NA,SO,ZA,TZ,UG,ZM,ZW		Hyperolius nasutus	FALSE	FALSE	FALSE	TRUE	FALSE	TRUE	FALSE	FALSE	TRUE	FALSE	TRUE	Hyperolius nasutus Günther, 1865	1865
Anura	Hyperoliidae		Hyperolius	ocellatus	Hyperolius ocellatus		Golden-eyed Reed Frog	Hyperolius ocellatus			Least Concern (LC)	AO,CM,CF,CG,CD,GQ,GA,NG,UG		Hyperolius ocellatus	FALSE	FALSE	FALSE	TRUE	FALSE	TRUE	FALSE	FALSE	FALSE	FALSE	TRUE	Hyperolius ocellatus Günther, 1858	1858
Anura	Hyperoliidae		Hyperolius	parkeri	Hyperolius parkeri		Parker's Reed Frog	Hyperolius parkeri			Least Concern (LC)	MZ,TZ,KE		Hyperolius parkeri	FALSE	TRUE	TRUE	TRUE	FALSE	TRUE	FALSE	FALSE	TRUE	TRUE	TRUE	Hyperolius parkeri Loveridge, 1933	1933
Anura	Hyperoliidae		Hyperolius	phantasticus	Hyperolius phantasticus			Hyperolius phantasticus			Least Concern (LC)	CM,CF,CG,CD,GA		Hyperolius phantasticus	FALSE	FALSE	FALSE	TRUE	FALSE	TRUE	FALSE	FALSE	FALSE	FALSE	TRUE	Hyperolius phantasticus (Boulenger, 1899)	1899
Anura	Hyperoliidae		Hyperolius	picturatus	Hyperolius picturatus			Hyperolius picturatus			Least Concern (LC)	GH,CI,LR,GN,SL		Hyperolius picturatus	FALSE	FALSE	FALSE	TRUE	FALSE	TRUE	FALSE	FALSE	TRUE	FALSE	TRUE	Hyperolius picturatus Peters, 1875	1875
Anura	Hyperoliidae		Hyperolius	pictus	Hyperolius pictus		Variable Reed Frog	Hyperolius pictus			Least Concern (LC)	MW,TZ,ZM		Hyperolius pictus	TRUE	FALSE	TRUE	TRUE	FALSE	TRUE	FALSE	FALSE	TRUE	TRUE	TRUE	Hyperolius pictus Ahl, 1931	1931
Anura	Hyperoliidae		Hyperolius	platyceps	Hyperolius platyceps			Hyperolius platyceps			Least Concern (LC)	AO,CM,CF,CG,CD,GQ,GA,ZM		Hyperolius platyceps	FALSE	FALSE	FALSE	TRUE	FALSE	TRUE	FALSE	FALSE	FALSE	FALSE	TRUE	Hyperolius platyceps (Boulenger, 1900)	1900
Anura	Hyperoliidae		Hyperolius	puncticulatus	Hyperolius puncticulatus		Spotted Reed Frog	Hyperolius puncticulatus			Endangered (EN)	TZ		Hyperolius puncticulatus	TRUE	TRUE	TRUE	TRUE	FALSE	TRUE	FALSE	FALSE	TRUE	TRUE	TRUE	Hyperolius puncticulatus (Pfeffer, 1893)	1893
Anura	Hyperoliidae		Hyperolius	riggenbachi	Hyperolius riggenbachi		Riggenbach's Reed Frog	Hyperolius riggenbachi			Vulnerable (VU)	CM,NG		Hyperolius riggenbachi	TRUE	TRUE	TRUE	TRUE	FALSE	TRUE	FALSE	FALSE	TRUE	FALSE	TRUE	Hyperolius riggenbachi (Nieden, 1910)	1910
Anura	Hyperoliidae		Hyperolius	substriatus	Hyperolius substriatus			Hyperolius substriatus			Least Concern (LC)	KE,MW,MZ,TZ		Hyperolius substriatus	FALSE	FALSE	FALSE	FALSE	FALSE	FALSE	FALSE	FALSE	FALSE	TRUE	TRUE	Hyperolius substriatus Ahl, 1931	1931
Anura	Hyperoliidae		Hyperolius	thomensis	Hyperolius thomensis		Sao Tome Giant Treefrog	Hyperolius thomensis	Nesionixalus thomensis	Nesionixalus thomensis	Endangered (EN)	ST		Hyperolius thomensis	FALSE	TRUE	TRUE	FALSE	FALSE	TRUE	FALSE	FALSE	FALSE	FALSE	TRUE	Hyperolius thomensis Bocage, 1886	1886
Anura	Hyperoliidae		Hyperolius	tuberculatus	Hyperolius tuberculatus			Hyperolius tuberculatus			Least Concern (LC)	CM,CF,CG,CD,GQ,GA,GN,NG		Hyperolius tuberculatus	FALSE	FALSE	FALSE	TRUE	FALSE	TRUE	FALSE	FALSE	FALSE	FALSE	TRUE	Hyperolius tuberculatus (Mocquard, 1897)	1897
Anura	Hyperoliidae		Hyperolius	tuberilinguis	Hyperolius tuberilinguis		Tinker Reed Frog	Hyperolius tuberilinguis			Least Concern (LC)	KE,MW,MZ,ZA,SZ,TZ,ZW		Hyperolius tuberilinguis	FALSE	FALSE	FALSE	TRUE	FALSE	TRUE	FALSE	FALSE	TRUE	FALSE	TRUE	Hyperolius tuberilinguis Smith, 1849	1849
Anura	Hyperoliidae		Hyperolius	viridiflavus	Hyperolius viridiflavus			Hyperolius viridiflavus			Least Concern (LC)	CF,CD,ET,KE,SS,TZ,UG		Hyperolius viridiflavus	TRUE	TRUE	TRUE	TRUE	FALSE	TRUE	FALSE	FALSE	TRUE	TRUE	TRUE	Hyperolius viridiflavus (Duméril and Bibron, 1841)	1841
Gymnophiona	Indotyphlidae		Hypogeophis	rostratus	Hypogeophis rostratus		Frigate Island Caecilian	Hypogeophis rostratus			Least Concern (LC)	SC		Hypogeophis rostratus	FALSE	FALSE	FALSE	TRUE	FALSE	TRUE	FALSE	FALSE	FALSE	FALSE	TRUE	Hypogeophis rostratus (Cuvier, 1829)	1829
Anura	Microhylidae	Gastrophryninae	Hypopachus	variolosus	Hypopachus variolosus		Sheep Frog	Hypopachus variolosus			Least Concern (LC)	BZ,CR,GT,HN,MX,NI,US		Hypopachus variolosus	FALSE	FALSE	FALSE	TRUE	FALSE	TRUE	FALSE	FALSE	FALSE	FALSE	TRUE	Hypopachus variolosus (Cope, 1866)	1866
Gymnophiona	Ichthyophiidae		Ichthyophis	glutinosus	Ichthyophis glutinosus		Common Yellowband Caecilian	Ichthyophis glutinosus			Least Concern (LC)	LK		Ichthyophis glutinosus	FALSE	TRUE	TRUE	FALSE	FALSE	TRUE	FALSE	FALSE	FALSE	FALSE	TRUE	Ichthyophis glutinosus (Linnaeus, 1758)	1758
Gymnophiona	Ichthyophiidae		Ichthyophis	kohtaoensis	Ichthyophis kohtaoensis		Kohtao Striped Caecilian	Ichthyophis kohtaoensis			Least Concern (LC)	MM,TH		Ichthyophis kohtaoensis	FALSE	TRUE	TRUE	TRUE	FALSE	TRUE	FALSE	FALSE	FALSE	FALSE	TRUE	Ichthyophis kohtaoensis Taylor, 1960	1960
Gymnophiona	Ichthyophiidae		Ichthyophis	supachaii	Ichthyophis supachaii		Peninsular Striped Caecilian	Ichthyophis supachaii			Data Deficient (DD)	TH		Ichthyophis supachaii	FALSE	FALSE	FALSE	TRUE	FALSE	TRUE	FALSE	FALSE	FALSE	FALSE	TRUE	Ichthyophis supachaii Taylor, 1960	1960
Caudata	Salamandridae	Pleurodelinae	Ichthyosaura	alpestris	Ichthyosaura alpestris		Alpine Newt	Ichthyosaura alpestris	Mesotriton alpestris, Triturus alpestris, Triton alpestris	Triturus alpestris, Triton alpestris	Least Concern (LC)	AL,AT,BY,BE,BA,BG,HR,CZ,DK,FR,DE,GR,HU,IT,LI,LU,MK,ME,NL,NZ,PL,RO,RS,SK,SI,ES,CH,UA,GB		Ichthyosaura alpestris	TRUE	TRUE	TRUE	FALSE	FALSE	TRUE	FALSE	FALSE	TRUE	TRUE	TRUE	Ichthyosaura alpestris (Laurenti, 1768)	1768
Anura	Bufonidae		Incilius	alvarius	Incilius alvarius		Sonoran Desert Toad, Colorado River Toad	Incilius alvarius	Bufo alvarius, Phrynoidis alvarius, Cranopsis alvaria	Bufo alvarius, Phrynoidis alvarius, Cranopsis alvaria	Least Concern (LC)	US,MX		Incilius alvarius	TRUE	TRUE	TRUE	FALSE	FALSE	TRUE	FALSE	FALSE	TRUE	FALSE	TRUE	Incilius alvarius (Girard, 1859)	1859
Anura	Bufonidae		Incilius	cavifrons	Incilius cavifrons			Incilius cavifrons	Bufo cavifrons	Bufo cavifrons	Endangered (EN)	MX		Incilius cavifrons	FALSE	FALSE	FALSE	FALSE	FALSE	FALSE	FALSE	FALSE	TRUE	FALSE	TRUE	Incilius cavifrons (Firschein, 1950)	1950
Anura	Bufonidae		Incilius	coccifer	Incilius coccifer			Incilius coccifer	Bufo coccifer	Bufo coccifer	Least Concern (LC)	CR,SV,GT,HN,MX,NI		Incilius coccifer	FALSE	FALSE	FALSE	TRUE	FALSE	TRUE	FALSE	FALSE	FALSE	FALSE	TRUE	Incilius coccifer (Cope, 1866)	1866
Anura	Bufonidae		Incilius	coniferus	Incilius coniferus		Green Climbing Toad	Incilius coniferus	Bufo gabbi, Bufo coniferus, Bufo ehlersi	Bufo gabbi, Bufo coniferus, Bufo ehlersi	Least Concern (LC)	CO,CR,EC,NI,PA		Incilius coniferus	TRUE	FALSE	TRUE	FALSE	FALSE	TRUE	FALSE	FALSE	FALSE	FALSE	TRUE	Incilius coniferus (Cope, 1862)	1862
Anura	Bufonidae		Incilius	luetkenii	Incilius luetkenii			Incilius luetkenii	Bufo luetkenii	Bufo luetkenii	Least Concern (LC)	SV,GT,HN,NI,CR		Incilius luetkenii	TRUE	TRUE	TRUE	FALSE	FALSE	TRUE	FALSE	FALSE	FALSE	FALSE	TRUE	Incilius luetkenii (Boulenger, 1891)	1891
Anura	Bufonidae		Incilius	marmoreus	Incilius marmoreus			Incilius marmoreus	Bufo marmoreus	Bufo marmoreus	Least Concern (LC)	MX		Incilius marmoreus	TRUE	FALSE	TRUE	FALSE	FALSE	TRUE	FALSE	FALSE	FALSE	FALSE	TRUE	Incilius marmoreus (Wiegmann, 1833)	1833
Anura	Bufonidae		Incilius	periglenes	Incilius periglenes		Sapo Dorado, Golden Toad	Incilius periglenes	Bufo periglenes	Bufo periglenes	Extinct (EX)	CR		Incilius periglenes	FALSE	FALSE	FALSE	FALSE	TRUE	TRUE	TRUE	I	FALSE	FALSE	TRUE	Incilius periglenes (Savage, 1967)	1967
Anura	Bufonidae		Incilius	porteri	Incilius porteri			Incilius porteri	Bufo porteri		Data Deficient (DD)	HN		Incilius porteri	FALSE	FALSE	FALSE	TRUE	FALSE	TRUE	FALSE	FALSE	FALSE	FALSE	TRUE	Incilius porteri (Mendelson, Williams, Sheil, and Mulcahy, 2005)	2005
Anura	Bufonidae		Incilius	valliceps	Incilius valliceps		Southern Gulf Coast Toad, Gulf Coast Toad	Incilius valliceps	Bufo valliceps, Bufo valliceps valliceps, Bufo trachypus	Bufo valliceps, Bufo valliceps valliceps, Bufo trachypus	Least Concern (LC)	BZ,CR,GT,HN,MX		Incilius valliceps	TRUE	FALSE	TRUE	FALSE	FALSE	TRUE	FALSE	FALSE	FALSE	FALSE	TRUE	Incilius valliceps (Wiegmann, 1833)	1833
Anura	Bufonidae		Ingerophrynus	biporcatus	Ingerophrynus biporcatus		Crested Toad, Kodok Puru Hutan	Ingerophrynus biporcatus	Bufo biporcatus	Bufo biporcatus	Least Concern (LC)	ID		Ingerophrynus biporcatus	TRUE	FALSE	TRUE	FALSE	FALSE	TRUE	FALSE	FALSE	FALSE	FALSE	TRUE	Ingerophrynus biporcatus (Gravenhorst, 1829)	1829
Anura	Bufonidae		Ingerophrynus	galeatus	Ingerophrynus galeatus			Ingerophrynus galeatus	Bufo galeatus	Bufo galeatus	Least Concern (LC)	KH,CN,LA,VN		Ingerophrynus galeatus	FALSE	TRUE	TRUE	TRUE	FALSE	TRUE	FALSE	FALSE	TRUE	FALSE	TRUE	Ingerophrynus galeatus (Günther, 1864)	1864
Anura	Bufonidae		Ingerophrynus	parvus	Ingerophrynus parvus		Lesser Toad, Malayan Dwarf Toad, Kodok Puru Kerdil	Ingerophrynus parvus	Bufo parvus	Bufo parvus	Least Concern (LC)	KH,ID,MY,MM,TH		Ingerophrynus parvus	FALSE	TRUE	TRUE	FALSE	FALSE	TRUE	FALSE	FALSE	FALSE	FALSE	TRUE	Ingerophrynus parvus (Boulenger, 1887)	1887
Anura	Hylidae	Hylinae	Isthmohyla	debilis	Isthmohyla debilis			Isthmohyla debilis	Hyla debilis	Hyla debilis	Critically Endangered (CR)	PA,CR		Isthmohyla debilis	FALSE	FALSE	FALSE	TRUE	FALSE	TRUE	FALSE	FALSE	FALSE	FALSE	TRUE	Isthmohyla debilis (Taylor, 1952)	1952
Anura	Hylidae	Hylinae	Isthmohyla	pseudopuma	Isthmohyla pseudopuma		Meadow Treefrog	Isthmohyla pseudopuma	Hyla pseudopuma	Hyla pseudopuma	Least Concern (LC)	PA,CR		Isthmohyla pseudopuma	TRUE	FALSE	TRUE	FALSE	FALSE	TRUE	FALSE	FALSE	FALSE	FALSE	TRUE	Isthmohyla pseudopuma (Günther, 1901)	1901
Anura	Microhylidae	Kalophryninae	Kalophrynus	interlineatus	Kalophrynus interlineatus		Striped Sticky Frog	Kalophrynus interlineatus			Least Concern (LC)	KH,CN,HK,LA,MY,MM,TH,VN		Kalophrynus interlineatus	FALSE	FALSE	FALSE	TRUE	FALSE	TRUE	FALSE	FALSE	FALSE	FALSE	TRUE	Kalophrynus interlineatus (Blyth, 1855)	1855
Anura	Microhylidae	Kalophryninae	Kalophrynus	pleurostigma	Kalophrynus pleurostigma		Black-Spotted Narrow-Mouthed Frog, Rufous-sided Sticky Frogs	Kalophrynus pleurostigma	Calophrynus acutirostris, Kalophrynus stellatus	Calophrynus acutirostris, Kalophrynus stellatus	Least Concern (LC)	ID		Kalophrynus pleurostigma	FALSE	FALSE	FALSE	TRUE	FALSE	TRUE	FALSE	FALSE	FALSE	FALSE	TRUE	Kalophrynus pleurostigma Tschudi, 1838	1838
Anura	Microhylidae	Microhylinae	Kaloula	baleata	Kaloula baleata		Smooth-Fingered Narrow-Mouthed Frog	Kaloula baleata			Least Concern (LC)	TH		Kaloula baleata	TRUE	TRUE	TRUE	TRUE	FALSE	TRUE	FALSE	FALSE	TRUE	FALSE	TRUE	Kaloula baleata (Müller, 1836)	1836
Anura	Microhylidae	Microhylinae	Kaloula	mediolineata	Kaloula mediolineata			Kaloula mediolineata			Near Threatened (NT)	LA,TH		Kaloula mediolineata	FALSE	FALSE	FALSE	FALSE	FALSE	FALSE	FALSE	FALSE	FALSE	TRUE	TRUE	Kaloula mediolineata Smith, 1917	1917
Anura	Microhylidae	Microhylinae	Kaloula	pulchra	Kaloula pulchra		Asian Painted Frog, Banded Bullfrog, Ox Frog, Piebald Digging Frog	Kaloula pulchra			Least Concern (LC)	BD,KH,CN,HK,IN,ID,LA,MY,MM,NP,PH,SG,TH,VN		Kaloula pulchra	TRUE	TRUE	TRUE	TRUE	FALSE	TRUE	FALSE	FALSE	TRUE	TRUE	TRUE	Kaloula pulchra Gray, 1831	1831
Anura	Hyperoliidae		Kassina	cochranae	Kassina cochranae			Kassina cochranae			Near Threatened (NT)	CI,GH,GN,LR,SL		Kassina cochranae	FALSE	TRUE	TRUE	FALSE	FALSE	TRUE	FALSE	FALSE	FALSE	FALSE	TRUE	Kassina cochranae (Loveridge, 1941)	1941
Anura	Hyperoliidae		Kassina	decorata	Kassina decorata			Kassina decorata			Vulnerable (VU)	CD,CM		Kassina decorata	TRUE	FALSE	TRUE	FALSE	FALSE	TRUE	FALSE	FALSE	FALSE	FALSE	TRUE	Kassina decorata (Angel, 1940)	1940
Anura	Hyperoliidae		Kassina	maculosa	Kassina maculosa			Kassina maculosa			Least Concern (LC)	CM,CF,CD,GA		Kassina maculosa	FALSE	FALSE	FALSE	TRUE	FALSE	TRUE	FALSE	FALSE	TRUE	FALSE	TRUE	Kassina maculosa (Sternfeld, 1917)	1917
Anura	Hyperoliidae		Kassina	senegalensis	Kassina senegalensis		Senegal kassina	Kassina senegalensis			Least Concern (LC)	AO,BJ,BW,BF,BI,CM,CF,TD,CD,CI,ET,GM,GH,GN,GW,KE,LS,MW,ML,MR,MZ,NA,NE,NG,RW,SN,SL,SO,ZA,SS,SD,SZ,TZ,TG,UG,ZM,ZW		Kassina senegalensis	TRUE	TRUE	TRUE	TRUE	FALSE	TRUE	FALSE	FALSE	TRUE	TRUE	TRUE	Kassina senegalensis (Duméril and Bibron, 1841)	1841
Anura	Rhacophoridae	Rhacophorinae	Kurixalus	appendiculatus	Kurixalus appendiculatus		Rough-Armed Tree Frog	Kurixalus appendiculatus			Least Concern (LC)	IN,ID,MY,MM,PH,VN		Kurixalus appendiculatus	FALSE	FALSE	FALSE	FALSE	FALSE	FALSE	FALSE	FALSE	TRUE	FALSE	TRUE	Kurixalus appendiculatus (Günther, 1858)	1858
Anura	Rhacophoridae	Rhacophorinae	Kurixalus	bisacculus	Kurixalus bisacculus		TaylorÃ¢â¬â¢s Rough-armed Treefrog	Kurixalus bisacculus	Rhacophorus bisacculus	Rhacophorus bisacculus	Least Concern (LC)	KH,CN,IN,LA,MM,TH,VN		Kurixalus bisacculus	FALSE	FALSE	FALSE	TRUE	FALSE	TRUE	FALSE	FALSE	FALSE	FALSE	TRUE	Kurixalus bisacculus (Taylor, 1962)	1962
Anura	Rhacophoridae	Rhacophorinae	Kurixalus	odontotarsus	Kurixalus odontotarsus			Kurixalus odontotarsus	Kurixalus hainanus, Philautus odontotarsus	Philautus odontotarsus	Least Concern (LC)	CN,VN		Kurixalus odontotarsus	TRUE	TRUE	TRUE	FALSE	FALSE	TRUE	FALSE	FALSE	TRUE	FALSE	TRUE	Kurixalus odontotarsus (Ye and Fei, 1993)	1993
Anura	Rhacophoridae	Rhacophorinae	Kurixalus	verrucosus	Kurixalus verrucosus			Kurixalus verrucosus	Rhacophorus verrucosus	Rhacophorus verrucosus	Least Concern (LC)	CN,MM,TH,VN		Kurixalus verrucosus	FALSE	FALSE	FALSE	FALSE	FALSE	FALSE	FALSE	FALSE	TRUE	FALSE	TRUE	Kurixalus verrucosus (Boulenger, 1893)	1893
Caudata	Salamandridae	Pleurodelinae	Laotriton	laoensis	Laotriton laoensis		Laos Warty Newt; Laotriton de Laos	Laotriton laoensis			Endangered (EN)	LA		Laotriton laoensis	TRUE	TRUE	TRUE	FALSE	TRUE	TRUE	FALSE	FALSE	TRUE	TRUE	TRUE	Laotriton laoensis (Stuart and Papenfuss, 2002)	2002
Anura	Myobatrachidae	Limnodynastinae	Lechriodus	melanopyga	Lechriodus melanopyga			Lechriodus melanopyga			Least Concern (LC)	PG,ID		Lechriodus melanopyga	FALSE	FALSE	FALSE	TRUE	FALSE	TRUE	FALSE	FALSE	FALSE	FALSE	TRUE	Lechriodus melanopyga (Doria, 1875)	1875
Anura	Leiopelmatidae		Leiopelma	archeyi	Leiopelma archeyi		Archey's Frog	Leiopelma archeyi			Critically Endangered (CR)	NZ		Leiopelma archeyi	FALSE	FALSE	FALSE	TRUE	FALSE	TRUE	FALSE	FALSE	FALSE	FALSE	TRUE	Leiopelma archeyi Turbott, 1942	1942
Anura	Leiopelmatidae		Leiopelma	hamiltoni	Leiopelma hamiltoni		Hamilton's Frog	Leiopelma hamiltoni			Vulnerable (VU)	NZ		Leiopelma hamiltoni	FALSE	FALSE	FALSE	TRUE	FALSE	TRUE	FALSE	FALSE	FALSE	FALSE	TRUE	Leiopelma hamiltoni McCulloch, 1919	1919
Anura	Leiopelmatidae		Leiopelma	hochstetteri	Leiopelma hochstetteri		Hochstetter's Frog	Leiopelma hochstetteri			Least Concern (LC)	NZ		Leiopelma hochstetteri	FALSE	FALSE	FALSE	TRUE	FALSE	TRUE	FALSE	FALSE	FALSE	FALSE	TRUE	Leiopelma hochstetteri Fitzinger, 1861	1861
Anura	Ceratophryidae		Lepidobatrachus	asper	Lepidobatrachus asper			Lepidobatrachus asper	Lepidobatrachus salinicola, Ceratophrys aspera	Lepidobatrachus salinicola, Ceratophrys aspera	Near Threatened (NT)	AR,BR,PY		Lepidobatrachus asper	FALSE	TRUE	TRUE	FALSE	FALSE	TRUE	FALSE	FALSE	FALSE	FALSE	TRUE	Lepidobatrachus asper Budgett, 1899	1899
Anura	Ceratophryidae		Lepidobatrachus	laevis	Lepidobatrachus laevis		Budgett's Frog, Escuerzo de agua	Lepidobatrachus laevis			Least Concern (LC)	AR,BO,PY		Lepidobatrachus laevis	TRUE	TRUE	TRUE	TRUE	FALSE	TRUE	FALSE	FALSE	TRUE	TRUE	TRUE	Lepidobatrachus laevis Budgett, 1899	1899
Anura	Ceratophryidae		Lepidobatrachus	llanensis	Lepidobatrachus llanensis			Lepidobatrachus llanensis			Least Concern (LC)	AR		Lepidobatrachus llanensis	TRUE	TRUE	TRUE	FALSE	FALSE	TRUE	FALSE	FALSE	TRUE	FALSE	TRUE	Lepidobatrachus llanensis Reig and Cei, 1963	1963
Anura	Megophryidae	Leptobrachiinae	Leptobrachella	dringi	Leptobrachella dringi			Leptolalax dringi	Leptolalax dringi		Near Threatened (NT)	MY		Leptobrachella dringi	FALSE	FALSE	FALSE	TRUE	FALSE	TRUE	FALSE	FALSE	FALSE	FALSE	TRUE	Leptobrachella dringi (Dubois, 1987)	1987
Anura	Megophryidae	Leptobrachiinae	Leptobrachella	pelodytoides	Leptobrachella pelodytoides			Leptolalax pelodytoides	Leptolalax pelodytoides		Least Concern (LC)	CN,MM		Leptobrachella pelodytoides	FALSE	FALSE	FALSE	TRUE	FALSE	TRUE	FALSE	FALSE	FALSE	FALSE	TRUE	Leptobrachella pelodytoides (Boulenger, 1893)	1893
Anura	Megophryidae	Leptobrachiinae	Leptobrachium	boringii	Leptobrachium boringii			Leptobrachium boringii	Vibrissaphora boringii	Vibrissaphora boringii	Endangered (EN)	CN		Leptobrachium boringii	FALSE	FALSE	FALSE	FALSE	FALSE	FALSE	FALSE	FALSE	FALSE	TRUE	TRUE	Leptobrachium boringii (Liu, 1945)	1945
Anura	Megophryidae	Leptobrachiinae	Leptobrachium	chapaense	Leptobrachium chapaense			Leptobrachium chapaense			Least Concern (LC)	CN,LA,MM,TH,VN		Leptobrachium chapaense	FALSE	FALSE	FALSE	TRUE	FALSE	TRUE	FALSE	FALSE	FALSE	FALSE	TRUE	Leptobrachium chapaense (Bourret, 1937)	1937
Anura	Megophryidae	Leptobrachiinae	Leptobrachium	hainanense	Leptobrachium hainanense			Leptobrachium hainanense			Vulnerable (VU)	CN		Leptobrachium hainanense	FALSE	FALSE	FALSE	FALSE	FALSE	FALSE	FALSE	FALSE	FALSE	TRUE	TRUE	Leptobrachium hainanense Ye and Fei, 1993	1993
Anura	Megophryidae	Leptobrachiinae	Leptobrachium	hasseltii	Leptobrachium hasseltii		Hasselt's Toad	Leptobrachium hasseltii			Least Concern (LC)	IN,ID		Leptobrachium hasseltii	FALSE	FALSE	FALSE	TRUE	FALSE	TRUE	FALSE	FALSE	TRUE	TRUE	TRUE	Leptobrachium hasseltii Tschudi, 1838	1838
Anura	Megophryidae	Leptobrachiinae	Leptobrachium	hendricksoni	Leptobrachium hendricksoni		Spotted Litter Frog	Leptobrachium hendricksoni			Least Concern (LC)	TH,MY		Leptobrachium hendricksoni	FALSE	TRUE	TRUE	TRUE	FALSE	TRUE	FALSE	FALSE	TRUE	FALSE	TRUE	Leptobrachium hendricksoni Taylor, 1962	1962
Anura	Megophryidae	Leptobrachiinae	Leptobrachium	leishanense	Leptobrachium leishanense			Leptobrachium leishanense	Xenophrys leishanensis, Vibrissaphora leishanensis	Vibrissaphora leishanensis	Endangered (EN)	CN		Leptobrachium leishanense	FALSE	FALSE	FALSE	FALSE	FALSE	FALSE	FALSE	FALSE	FALSE	TRUE	TRUE	Leptobrachium leishanense (Liu and Hu, 1973)	1973
Anura	Megophryidae	Leptobrachiinae	Leptobrachium	mangyanorum	Leptobrachium mangyanorum						NA	PH		Leptobrachium mangyanorum	FALSE	FALSE	FALSE	FALSE	FALSE	FALSE	FALSE	FALSE	FALSE	TRUE	TRUE	Leptobrachium mangyanorum Brown, Siler, Diesmos, and Alcala, 2010	2010
Anura	Megophryidae	Leptobrachiinae	Leptobrachium	smithi	Leptobrachium smithi		Southern Bicolor-eyed Toadfrog	Leptobrachium smithi			Least Concern (LC)	BD,IN,LA,MY,MM,TH		Leptobrachium smithi	FALSE	FALSE	FALSE	FALSE	FALSE	FALSE	FALSE	FALSE	FALSE	TRUE	TRUE	Leptobrachium smithi Matsui, Nabhitabhata, and Panha, 1999	1999
Anura	Arthroleptidae		Leptodactylodon	bicolor	Leptodactylodon bicolor			Leptodactylodon bicolor			Near Threatened (NT)	CM,NG		Leptodactylodon bicolor	FALSE	FALSE	FALSE	TRUE	FALSE	TRUE	FALSE	FALSE	FALSE	TRUE	TRUE	Leptodactylodon bicolor Amiet, 1971	1971
Anura	Leptodactylidae	Leptodactylinae	Leptodactylus	bolivianus	Leptodactylus bolivianus		Rana-Sapo boliviano	Leptodactylus bolivianus	Leptodactylus romani	Leptodactylus romani	Least Concern (LC)	BO,BR,CO,PE,VE		Leptodactylus bolivianus	FALSE	FALSE	FALSE	TRUE	FALSE	TRUE	FALSE	FALSE	FALSE	TRUE	TRUE	Leptodactylus bolivianus Boulenger, 1898	1898
Anura	Leptodactylidae	Leptodactylinae	Leptodactylus	bufonius	Leptodactylus bufonius			Leptodactylus bufonius			Least Concern (LC)	PY,BR,BO,AR		Leptodactylus bufonius	FALSE	FALSE	FALSE	TRUE	FALSE	TRUE	FALSE	FALSE	FALSE	FALSE	TRUE	Leptodactylus bufonius Boulenger, 1894	1894
Anura	Leptodactylidae	Leptodactylinae	Leptodactylus	chaquensis	Leptodactylus chaquensis			Leptodactylus chaquensis			Least Concern (LC)	AR,BO,BR,PY,UY		Leptodactylus chaquensis	FALSE	TRUE	TRUE	TRUE	FALSE	TRUE	FALSE	FALSE	FALSE	TRUE	TRUE	Leptodactylus chaquensis Cei, 1950	1950
Anura	Leptodactylidae	Leptodactylinae	Leptodactylus	fallax	Leptodactylus fallax		Middle American White-lipped Frog, Mountain Chicken; Giant Ditch Frog; Crapaud	Leptodactylus fallax			Critically Endangered (CR)	DM,GP,MQ,MS,KN,LC		Leptodactylus fallax	TRUE	FALSE	TRUE	TRUE	FALSE	TRUE	FALSE	FALSE	TRUE	TRUE	TRUE	Leptodactylus fallax Müller, 1926	1926
Anura	Leptodactylidae	Leptodactylinae	Leptodactylus	fuscus	Leptodactylus fuscus		South American White-lipped Grassfrog	Leptodactylus fuscus	Leptodactylus gualambensis, Leptodactylus raniformis, Leptodactylus sibilator	Leptodactylus gualambensis, Leptodactylus raniformis, Leptodactylus sibilator	Least Concern (LC)	AR,BO,BR,CO,GF,GY,PA,PE,SR,TT,VE		Leptodactylus fuscus	FALSE	FALSE	FALSE	TRUE	FALSE	TRUE	FALSE	FALSE	FALSE	FALSE	TRUE	Leptodactylus fuscus (Schneider, 1799)	1799
Anura	Leptodactylidae	Leptodactylinae	Leptodactylus	guianensis	Leptodactylus guianensis						NA	BR,GY,SR,VE		Leptodactylus guianensis	FALSE	FALSE	FALSE	TRUE	FALSE	TRUE	FALSE	FALSE	FALSE	FALSE	TRUE	Leptodactylus guianensis Heyer and de Sá, 2011	2011
Anura	Leptodactylidae	Leptodactylinae	Leptodactylus	knudseni	Leptodactylus knudseni		Knudsen's thin-toed frog, RÃÂ£-de-dedos-delgados-de-Knudsen, Rana de dedos delgados de Knudsen	Leptodactylus knudseni			Least Concern (LC)	TT,PE,SR,GY,GF,VE,EC,CO,BR,BO		Leptodactylus knudseni	FALSE	FALSE	FALSE	TRUE	FALSE	TRUE	FALSE	FALSE	FALSE	FALSE	TRUE	Leptodactylus knudseni Heyer, 1972	1972
Anura	Leptodactylidae	Leptodactylinae	Leptodactylus	labrosus	Leptodactylus labrosus			Leptodactylus labrosus	Leptodactylus curtus	Leptodactylus curtus	Least Concern (LC)	PE,EC		Leptodactylus labrosus	FALSE	FALSE	FALSE	TRUE	FALSE	TRUE	FALSE	FALSE	FALSE	FALSE	TRUE	Leptodactylus labrosus Jiménez de la Espada, 1875	1875
Anura	Leptodactylidae	Leptodactylinae	Leptodactylus	labyrinthicus	Leptodactylus labyrinthicus		Pepper frog, RÃÂ£-pimenta, Rana pimienta	Leptodactylus labyrinthicus	Leptodactylus bufo, Rana labyrinthica, Leptodactylus wuchereri	Leptodactylus bufo, Rana labyrinthica, Leptodactylus wuchereri	Least Concern (LC)	BO,AR,VE,PY,BR		Leptodactylus labyrinthicus	FALSE	FALSE	FALSE	FALSE	FALSE	FALSE	FALSE	FALSE	FALSE	TRUE	TRUE	Leptodactylus labyrinthicus (Spix, 1824)	1824
Anura	Leptodactylidae	Leptodactylinae	Leptodactylus	laticeps	Leptodactylus laticeps			Leptodactylus laticeps			Near Threatened (NT)	AR,BR,PY		Leptodactylus laticeps	FALSE	TRUE	TRUE	TRUE	FALSE	TRUE	FALSE	FALSE	TRUE	TRUE	TRUE	Leptodactylus laticeps Boulenger, 1918	1918
Anura	Leptodactylidae	Leptodactylinae	Leptodactylus	latrans	Leptodactylus latrans		South American Spotted Grassfrog, Criolla Frog	Leptodactylus latrans			Least Concern (LC)	AR,BO,BR,PY,UY		Leptodactylus latrans	FALSE	FALSE	FALSE	FALSE	FALSE	FALSE	FALSE	FALSE	FALSE	TRUE	TRUE	Leptodactylus latrans (Steffen, 1815)	1815
Anura	Leptodactylidae	Leptodactylinae	Leptodactylus	melanonotus	Leptodactylus melanonotus		Reddish-brown White-lipped Frog	Leptodactylus melanonotus	Leptodactylus occidentalis, Cystignathus melanonotus, Cystignathus echinatus	Leptodactylus occidentalis, Cystignathus melanonotus, Cystignathus echinatus	Least Concern (LC)	PA,CR,HN,SV,BZ,GT,CO,EC,NI,MX		Leptodactylus melanonotus	FALSE	FALSE	FALSE	TRUE	FALSE	TRUE	FALSE	FALSE	FALSE	FALSE	TRUE	Leptodactylus melanonotus (Hallowell, 1861)	1861
Anura	Leptodactylidae	Leptodactylinae	Leptodactylus	myersi	Leptodactylus myersi		Myers' thin-toed frog, RÃÂ£-de-dedos-delgados-de-Myers, Rana de dedos delgados de Myers	Leptodactylus myersi			Least Concern (LC)	SR,GF,BR		Leptodactylus myersi	FALSE	FALSE	FALSE	TRUE	FALSE	TRUE	FALSE	FALSE	FALSE	FALSE	TRUE	Leptodactylus myersi Heyer, 1995	1995
Anura	Leptodactylidae	Leptodactylinae	Leptodactylus	mystaceus	Leptodactylus mystaceus			Leptodactylus mystaceus			Least Concern (LC)	SR,GY,GF,VE,CO,EC,PE,BO,PY,BR		Leptodactylus mystaceus	FALSE	FALSE	FALSE	TRUE	FALSE	TRUE	FALSE	FALSE	FALSE	FALSE	TRUE	Leptodactylus mystaceus (Spix, 1824)	1824
Anura	Leptodactylidae	Leptodactylinae	Leptodactylus	mystacinus	Leptodactylus mystacinus		Mustached Frog	Leptodactylus mystacinus	Leptodactylus labialis, Cystignathus mystacinus, Cystignathus labialis	Leptodactylus labialis, Cystignathus mystacinus, Cystignathus labialis	Least Concern (LC)	PY,UY,BR,BO,AR		Leptodactylus mystacinus	FALSE	FALSE	FALSE	TRUE	FALSE	TRUE	FALSE	FALSE	FALSE	FALSE	TRUE	Leptodactylus mystacinus (Burmeister, 1861)	1861
Anura	Leptodactylidae	Leptodactylinae	Leptodactylus	pentadactylus	Leptodactylus pentadactylus		Smoky Jungle Frog, Rana Comepollos, Rana Ternero, Central American Bullfrog, South American Bullfrog, RÃÂ£-defumada-da-selva, Rana ahumado de la selva	Leptodactylus pentadactylus	Leptodactylus macroblepharus, Rana pentadactyla	Leptodactylus macroblepharus, Rana pentadactyla	Least Concern (LC)	BO,BR,CO,EC,GF,PE,SR		Leptodactylus pentadactylus	FALSE	TRUE	TRUE	TRUE	FALSE	TRUE	FALSE	FALSE	TRUE	TRUE	TRUE	Leptodactylus pentadactylus (Laurenti, 1768)	1768
Anura	Leptodactylidae	Leptodactylinae	Leptodactylus	poecilochilus	Leptodactylus poecilochilus			Leptodactylus poecilochilus	Leptodactylus maculilabris, Leptodactylus quadrivittatus, Cystignathus poecilochilus	Leptodactylus maculilabris, Leptodactylus quadrivittatus, Cystignathus poecilochilus	Least Concern (LC)	VE,CO,PA,CR		Leptodactylus poecilochilus	FALSE	FALSE	FALSE	TRUE	FALSE	TRUE	FALSE	FALSE	FALSE	FALSE	TRUE	Leptodactylus poecilochilus (Cope, 1862)	1862
Anura	Leptodactylidae	Leptodactylinae	Leptodactylus	rhodomerus	Leptodactylus rhodomerus		Red-thighed thin-toed frog, RÃÂ£-de-dedos-delgados-de-coxas-vermelhas, Rana dededos delgados de muslos rojos	Leptodactylus rhodomerus			Least Concern (LC)	CO,EC		Leptodactylus rhodomerus	FALSE	FALSE	FALSE	FALSE	FALSE	FALSE	FALSE	FALSE	FALSE	TRUE	TRUE	Leptodactylus rhodomerus Heyer, 2005	2005
Anura	Leptodactylidae	Leptodactylinae	Leptodactylus	rhodomystax	Leptodactylus rhodomystax			Leptodactylus rhodomystax	Leptodactylus stictigularis	Leptodactylus stictigularis	Least Concern (LC)	BO,BR,CO,EC,GF,GY,PE,SR,VE		Leptodactylus rhodomystax	FALSE	FALSE	FALSE	TRUE	FALSE	TRUE	FALSE	FALSE	FALSE	FALSE	TRUE	Leptodactylus rhodomystax Boulenger, 1884	1884
Anura	Leptodactylidae	Leptodactylinae	Leptodactylus	wagneri	Leptodactylus wagneri			Leptodactylus wagneri			Least Concern (LC)	AR,BR,CO,EC,GF,GD,GY,PE,VC,SR,TT,VE		Leptodactylus wagneri	FALSE	FALSE	FALSE	TRUE	FALSE	TRUE	FALSE	FALSE	TRUE	FALSE	TRUE	Leptodactylus wagneri (Peters, 1862)	1862
Anura	Arthroleptidae		Leptopelis	argenteus	Leptopelis argenteus		Silvery Tree Frog	Leptopelis argenteus	Hylambates argenteus	Hylambates argenteus	Least Concern (LC)	KE,MW,MZ,TZ,ZW		Leptopelis argenteus	TRUE	FALSE	TRUE	TRUE	FALSE	TRUE	FALSE	FALSE	TRUE	TRUE	TRUE	Leptopelis argenteus (Pfeffer, 1893)	1893
Anura	Arthroleptidae		Leptopelis	bocagii	Leptopelis bocagii		Bocage's Tree Frog	Leptopelis bocagii	Leptopelis bocagei		Least Concern (LC)	AO,BI,CD,ET,KE,MW,MZ,NA,RW,ZA,TZ,ZM,ZW		Leptopelis bocagii	FALSE	TRUE	TRUE	TRUE	FALSE	TRUE	FALSE	FALSE	TRUE	TRUE	TRUE	Leptopelis bocagii (Günther, 1865)	1865
Anura	Arthroleptidae		Leptopelis	boulengeri	Leptopelis boulengeri			Leptopelis boulengeri			Least Concern (LC)	CM,CG,CD,GQ,GA,NG		Leptopelis boulengeri	FALSE	TRUE	TRUE	FALSE	FALSE	TRUE	FALSE	FALSE	FALSE	FALSE	TRUE	Leptopelis boulengeri (Werner, 1898)	1898
Anura	Arthroleptidae		Leptopelis	brevirostris	Leptopelis brevirostris			Leptopelis brevirostris	Leptopelis crystallinoron, Leptopelis brevipes		Least Concern (LC)	CM,CG,GQ,GA,NG		Leptopelis brevirostris	TRUE	TRUE	TRUE	TRUE	FALSE	TRUE	FALSE	FALSE	TRUE	FALSE	TRUE	Leptopelis brevirostris (Werner, 1898)	1898
Anura	Arthroleptidae		Leptopelis	broadleyi	Leptopelis broadleyi			Leptopelis argenteus	Leptopelis argenteus, Hylambates argenteus	Hylambates argenteus	Least Concern (LC)	ZW,MZ,MW		Leptopelis broadleyi	TRUE	FALSE	TRUE	FALSE	FALSE	TRUE	FALSE	FALSE	FALSE	FALSE	TRUE	Leptopelis broadleyi (Poynton, 1985)	1985
Anura	Arthroleptidae		Leptopelis	calcaratus	Leptopelis calcaratus			Leptopelis calcaratus			Least Concern (LC)	CM,CF,CG,CD,GQ,GA,NG		Leptopelis calcaratus	FALSE	FALSE	FALSE	TRUE	FALSE	TRUE	FALSE	FALSE	FALSE	FALSE	TRUE	Leptopelis calcaratus (Boulenger, 1906)	1906
Anura	Arthroleptidae		Leptopelis	christyi	Leptopelis christyi			Leptopelis christyi			Least Concern (LC)	CD,TZ,UG		Leptopelis christyi	FALSE	TRUE	TRUE	TRUE	FALSE	TRUE	FALSE	FALSE	FALSE	FALSE	TRUE	Leptopelis christyi (Boulenger, 1912)	1912
Anura	Arthroleptidae		Leptopelis	cynnamomeus	Leptopelis cynnamomeus		Cinnamon tree frog	Leptopelis cynnamomeus			Least Concern (LC)	AO,BI,CD,RW,ZM		Leptopelis cynnamomeus	FALSE	FALSE	FALSE	TRUE	FALSE	TRUE	FALSE	FALSE	FALSE	FALSE	TRUE	Leptopelis cynnamomeus (Bocage, 1893)	1893
Anura	Arthroleptidae		Leptopelis	fiziensis	Leptopelis fiziensis			Leptopelis fiziensis			Data Deficient (DD)	TZ,CD		Leptopelis fiziensis	FALSE	FALSE	FALSE	TRUE	FALSE	TRUE	FALSE	FALSE	FALSE	FALSE	TRUE	Leptopelis fiziensis Laurent, 1973	1973
Anura	Arthroleptidae		Leptopelis	flavomaculatus	Leptopelis flavomaculatus		Yellow-spotted tree frog	Leptopelis flavomaculatus			Least Concern (LC)	KE,MW,MZ,TZ,ZW		Leptopelis flavomaculatus	FALSE	TRUE	TRUE	TRUE	FALSE	TRUE	FALSE	FALSE	TRUE	FALSE	TRUE	Leptopelis flavomaculatus (Günther, 1864)	1864
Anura	Arthroleptidae		Leptopelis	grandiceps	Leptopelis grandiceps			Leptopelis grandiceps	Leptopelis barbouri		Vulnerable (VU)	TZ		Leptopelis grandiceps	FALSE	TRUE	TRUE	TRUE	FALSE	TRUE	FALSE	FALSE	FALSE	FALSE	TRUE	Leptopelis grandiceps Ahl, 1929	1929
Anura	Arthroleptidae		Leptopelis	karissimbensis	Leptopelis karissimbensis			Leptopelis karissimbensis			Vulnerable (VU)	CD,RW,UG		Leptopelis karissimbensis	FALSE	FALSE	FALSE	TRUE	FALSE	TRUE	FALSE	FALSE	FALSE	FALSE	TRUE	Leptopelis karissimbensis Ahl, 1929	1929
Anura	Arthroleptidae		Leptopelis	kivuensis	Leptopelis kivuensis			Leptopelis kivuensis			Least Concern (LC)	BI,RW,UG,CD		Leptopelis kivuensis	FALSE	FALSE	FALSE	TRUE	FALSE	TRUE	FALSE	FALSE	FALSE	FALSE	TRUE	Leptopelis kivuensis Ahl, 1929	1929
Anura	Arthroleptidae		Leptopelis	macrotis	Leptopelis macrotis			Leptopelis macrotis			Near Threatened (NT)	GH,CI,LR,SL		Leptopelis macrotis	TRUE	FALSE	TRUE	FALSE	FALSE	TRUE	FALSE	FALSE	TRUE	FALSE	TRUE	Leptopelis macrotis Schiøtz, 1967	1967
Anura	Arthroleptidae		Leptopelis	mossambicus	Leptopelis mossambicus		Mozambique tree frog	Leptopelis mossambicus			Least Concern (LC)	MW,MZ,ZA,SZ,ZW		Leptopelis mossambicus	FALSE	TRUE	TRUE	FALSE	FALSE	TRUE	FALSE	FALSE	FALSE	FALSE	TRUE	Leptopelis mossambicus Poynton, 1985	1985
Anura	Arthroleptidae		Leptopelis	nordequatorialis	Leptopelis nordequatorialis			Leptopelis nordequatorialis			Least Concern (LC)	CM,NG		Leptopelis nordequatorialis	TRUE	FALSE	TRUE	FALSE	FALSE	TRUE	FALSE	FALSE	FALSE	FALSE	TRUE	Leptopelis nordequatorialis Perret, 1966	1966
Anura	Arthroleptidae		Leptopelis	notatus	Leptopelis notatus			Leptopelis notatus	Habrahyla eiselti, Hylambates notatus, Hylambates tessmanni	Habrahyla eiselti, Hylambates notatus, Hylambates tessmanni	Least Concern (LC)	CM,CG,CD,GA,NG		Leptopelis notatus	FALSE	FALSE	FALSE	FALSE	FALSE	FALSE	FALSE	FALSE	FALSE	TRUE	TRUE	Leptopelis notatus (Peters, 1875)	1875
Anura	Arthroleptidae		Leptopelis	ocellatus	Leptopelis ocellatus			Leptopelis ocellatus			Least Concern (LC)	CM,CG,CD,GA		Leptopelis ocellatus	FALSE	FALSE	FALSE	TRUE	FALSE	TRUE	FALSE	FALSE	FALSE	FALSE	TRUE	Leptopelis ocellatus (Mocquard, 1902)	1902
Anura	Arthroleptidae		Leptopelis	ragazzii	Leptopelis ragazzii			Leptopelis ragazzii			Vulnerable (VU)	ET		Leptopelis ragazzii	FALSE	FALSE	FALSE	TRUE	FALSE	TRUE	FALSE	FALSE	FALSE	FALSE	TRUE	Leptopelis ragazzii (Boulenger, 1896)	1896
Anura	Arthroleptidae		Leptopelis	rufus	Leptopelis rufus			Leptopelis rufus			Least Concern (LC)	CM,CD,GA,NG		Leptopelis rufus	TRUE	FALSE	TRUE	FALSE	FALSE	TRUE	FALSE	FALSE	TRUE	FALSE	TRUE	Leptopelis rufus Reichenow, 1874	1874
Anura	Arthroleptidae		Leptopelis	spiritusnoctis	Leptopelis spiritusnoctis			Leptopelis spiritusnoctis			Least Concern (LC)	BJ,CI,GH,GN,LR,NG,SL,TG		Leptopelis spiritusnoctis	TRUE	TRUE	TRUE	FALSE	FALSE	TRUE	FALSE	FALSE	FALSE	FALSE	TRUE	Leptopelis spiritusnoctis Rödel, 2007	2007
Anura	Arthroleptidae		Leptopelis	uluguruensis	Leptopelis uluguruensis			Leptopelis uluguruensis			Near Threatened (NT)	TZ		Leptopelis uluguruensis	TRUE	TRUE	TRUE	TRUE	FALSE	TRUE	FALSE	FALSE	TRUE	FALSE	TRUE	Leptopelis uluguruensis Barbour and Loveridge, 1928	1928
Anura	Arthroleptidae		Leptopelis	vermiculatus	Leptopelis vermiculatus			Leptopelis vermiculatus			Endangered (EN)	TZ		Leptopelis vermiculatus	TRUE	TRUE	TRUE	TRUE	FALSE	TRUE	FALSE	FALSE	TRUE	TRUE	TRUE	Leptopelis vermiculatus (Boulenger, 1909)	1909
Anura	Arthroleptidae		Leptopelis	viridis	Leptopelis viridis			Leptopelis viridis			Least Concern (LC)	BJ,BF,CM,CD,CI,GA,GM,GH,GN,GW,LR,NE,NG,SN,SL,SS,TG		Leptopelis viridis	FALSE	FALSE	FALSE	TRUE	FALSE	TRUE	FALSE	FALSE	TRUE	FALSE	TRUE	Leptopelis viridis (Günther, 1869)	1869
Anura	Bufonidae		Leptophryne	cruentata	Leptophryne cruentata		Bleeding Toad, Kodok Merah	Leptophryne cruentata			Critically Endangered (CR)	ID		Leptophryne cruentata	FALSE	FALSE	FALSE	FALSE	FALSE	FALSE	FALSE	FALSE	FALSE	TRUE	TRUE	Leptophryne cruentata (Tschudi, 1838)	1838
Anura	Myobatrachidae	Limnodynastinae	Limnodynastes	dumerilii	Limnodynastes dumerilii		Bullfrog, Pobblebonk	Limnodynastes dumerilii			Least Concern (LC)	AU		Limnodynastes dumerilii	FALSE	FALSE	FALSE	FALSE	FALSE	FALSE	FALSE	FALSE	TRUE	FALSE	TRUE	Limnodynastes dumerilii Peters, 1863	1863
Anura	Myobatrachidae	Limnodynastinae	Limnodynastes	peronii	Limnodynastes peronii		Striped Marsh Frog, Brown Frog	Limnodynastes peronii			Least Concern (LC)	AU		Limnodynastes peronii	FALSE	TRUE	TRUE	FALSE	FALSE	TRUE	FALSE	FALSE	TRUE	FALSE	TRUE	Limnodynastes peronii (Duméril and Bibron, 1841)	1841
Anura	Myobatrachidae	Limnodynastinae	Limnodynastes	salmini	Limnodynastes salmini		Salmon-striped Frog	Limnodynastes salmini			Least Concern (LC)	AU		Limnodynastes salmini	FALSE	FALSE	FALSE	FALSE	FALSE	FALSE	FALSE	FALSE	TRUE	FALSE	TRUE	Limnodynastes salmini Steindachner, 1867	1867
Anura	Myobatrachidae	Limnodynastinae	Limnodynastes	tasmaniensis	Limnodynastes tasmaniensis		Spotted Grass Frog	Limnodynastes tasmaniensis			Least Concern (LC)	AU		Limnodynastes tasmaniensis	TRUE	FALSE	TRUE	FALSE	FALSE	TRUE	FALSE	FALSE	TRUE	FALSE	TRUE	Limnodynastes tasmaniensis Günther, 1858	1858
Anura	Dicroglossidae	Dicroglossinae	Limnonectes	acanthi	Limnonectes acanthi			Limnonectes acanthi			Vulnerable (VU)	PH		Limnonectes acanthi	FALSE	FALSE	FALSE	FALSE	FALSE	FALSE	FALSE	FALSE	FALSE	TRUE	TRUE	Limnonectes acanthi (Taylor, 1923)	1923
Anura	Dicroglossidae	Dicroglossinae	Limnonectes	blythii	Limnonectes blythii		Blyth's River Frog, Blyth's Wart Frog, Giant Asian River Frog, Malayan Giant Frog, Blyth's Fanged Frog	Limnonectes blythii			Near Threatened (NT)	ID,LA,MY,MM,PH,SG,TH,VN		Limnonectes blythii	FALSE	FALSE	FALSE	TRUE	FALSE	TRUE	FALSE	FALSE	TRUE	TRUE	TRUE	Limnonectes blythii (Boulenger, 1920)	1920
Anura	Dicroglossidae	Dicroglossinae	Limnonectes	diuatus	Limnonectes diuatus			Limnonectes diuatus			Vulnerable (VU)	PH		Limnonectes diuatus	FALSE	FALSE	FALSE	FALSE	FALSE	FALSE	FALSE	FALSE	FALSE	TRUE	TRUE	Limnonectes diuatus (Brown and Alcala, 1977)	1977
Anura	Dicroglossidae	Dicroglossinae	Limnonectes	fujianensis	Limnonectes fujianensis			Limnonectes fujianensis			Least Concern (LC)	CN		Limnonectes fujianensis	FALSE	FALSE	FALSE	FALSE	FALSE	FALSE	FALSE	FALSE	FALSE	TRUE	TRUE	Limnonectes fujianensis Ye and Fei, 1994	1994
Anura	Dicroglossidae	Dicroglossinae	Limnonectes	grunniens	Limnonectes grunniens			Limnonectes grunniens			Least Concern (LC)	ID		Limnonectes grunniens	FALSE	FALSE	FALSE	FALSE	FALSE	FALSE	FALSE	FALSE	FALSE	TRUE	TRUE	Limnonectes grunniens (Latreille, 1801)	1801
Anura	Dicroglossidae	Dicroglossinae	Limnonectes	gyldenstolpei	Limnonectes gyldenstolpei			Limnonectes gyldenstolpei			Least Concern (LC)	KH,LA,MY,TH		Limnonectes gyldenstolpei	FALSE	FALSE	FALSE	TRUE	FALSE	TRUE	FALSE	FALSE	FALSE	TRUE	TRUE	Limnonectes gyldenstolpei (Andersson, 1916)	1916
Anura	Dicroglossidae	Dicroglossinae	Limnonectes	heinrichi	Limnonectes heinrichi			Limnonectes heinrichi			Vulnerable (VU)	ID		Limnonectes heinrichi	FALSE	FALSE	FALSE	FALSE	FALSE	FALSE	FALSE	FALSE	FALSE	TRUE	TRUE	Limnonectes heinrichi (Ahl, 1933)	1933
Anura	Dicroglossidae	Dicroglossinae	Limnonectes	ibanorum	Limnonectes ibanorum			Limnonectes ibanorum			Near Threatened (NT)	ID,MY		Limnonectes ibanorum	FALSE	FALSE	FALSE	FALSE	FALSE	FALSE	FALSE	FALSE	FALSE	TRUE	TRUE	Limnonectes ibanorum (Inger, 1964)	1964
Anura	Dicroglossidae	Dicroglossinae	Limnonectes	ingeri	Limnonectes ingeri			Limnonectes ingeri			Near Threatened (NT)	BN,ID,MY		Limnonectes ingeri	FALSE	FALSE	FALSE	FALSE	FALSE	FALSE	FALSE	FALSE	FALSE	TRUE	TRUE	Limnonectes ingeri (Kiew, 1978)	1978
Anura	Dicroglossidae	Dicroglossinae	Limnonectes	isanensis	Limnonectes isanensis		Isan Big-headed frog	Limnonectes isanensis			Vulnerable (VU)	TH		Limnonectes isanensis	FALSE	FALSE	FALSE	FALSE	FALSE	FALSE	FALSE	FALSE	FALSE	TRUE	TRUE	Limnonectes isanensis McLeod, Kelly, and Barley, 2012	2012
Anura	Dicroglossidae	Dicroglossinae	Limnonectes	kuhlii	Limnonectes kuhlii			Limnonectes kuhlii			Least Concern (LC)	IN,ID,MY		Limnonectes kuhlii	FALSE	FALSE	FALSE	TRUE	FALSE	TRUE	FALSE	FALSE	TRUE	TRUE	TRUE	Limnonectes kuhlii (Tschudi, 1838)	1838
Anura	Dicroglossidae	Dicroglossinae	Limnonectes	leporinus	Limnonectes leporinus			Limnonectes leporinus			Least Concern (LC)	MY,ID,BN		Limnonectes leporinus	FALSE	FALSE	FALSE	FALSE	FALSE	FALSE	FALSE	FALSE	FALSE	TRUE	TRUE	Limnonectes leporinus (Andersson, 1923)	1923
Anura	Dicroglossidae	Dicroglossinae	Limnonectes	leytensis	Limnonectes leytensis			Limnonectes leytensis			Least Concern (LC)	PH		Limnonectes leytensis	FALSE	FALSE	FALSE	FALSE	FALSE	FALSE	FALSE	FALSE	FALSE	TRUE	TRUE	Limnonectes leytensis (Boettger, 1893)	1893
Anura	Dicroglossidae	Dicroglossinae	Limnonectes	macrocephalus	Limnonectes macrocephalus			Limnonectes macrocephalus			Near Threatened (NT)	PH		Limnonectes macrocephalus	FALSE	FALSE	FALSE	FALSE	FALSE	FALSE	FALSE	FALSE	FALSE	TRUE	TRUE	Limnonectes macrocephalus (Inger, 1954)	1954
Anura	Dicroglossidae	Dicroglossinae	Limnonectes	macrodon	Limnonectes macrodon			Limnonectes macrodon			Vulnerable (VU)	ID		Limnonectes macrodon	FALSE	FALSE	FALSE	TRUE	TRUE	TRUE	FALSE	FALSE	FALSE	TRUE	TRUE	Limnonectes macrodon (Duméril and Bibron, 1841)	1841
Anura	Dicroglossidae	Dicroglossinae	Limnonectes	macrognathus	Limnonectes macrognathus			Limnonectes macrognathus			Least Concern (LC)	TH,MY,MM		Limnonectes macrognathus	FALSE	FALSE	FALSE	FALSE	FALSE	FALSE	FALSE	FALSE	FALSE	TRUE	TRUE	Limnonectes macrognathus (Boulenger, 1917)	1917
Anura	Dicroglossidae	Dicroglossinae	Limnonectes	magnus	Limnonectes magnus			Limnonectes magnus			Near Threatened (NT)	ID,PH		Limnonectes magnus	FALSE	FALSE	FALSE	FALSE	FALSE	FALSE	FALSE	FALSE	FALSE	TRUE	TRUE	Limnonectes magnus (Stejneger, 1910)	1910
Anura	Dicroglossidae	Dicroglossinae	Limnonectes	malesianus	Limnonectes malesianus			Limnonectes malesianus			Near Threatened (NT)	SG,MY,ID		Limnonectes malesianus	TRUE	FALSE	TRUE	FALSE	FALSE	TRUE	FALSE	FALSE	FALSE	TRUE	TRUE	Limnonectes malesianus (Kiew, 1984)	1984
Anura	Dicroglossidae	Dicroglossinae	Limnonectes	microtympanum	Limnonectes microtympanum			Limnonectes microtympanum			Endangered (EN)	ID		Limnonectes microtympanum	FALSE	FALSE	FALSE	FALSE	FALSE	FALSE	FALSE	FALSE	FALSE	TRUE	TRUE	Limnonectes microtympanum (Van Kampen, 1907)	1907
Anura	Dicroglossidae	Dicroglossinae	Limnonectes	poilani	Limnonectes poilani			Limnonectes poilani			Least Concern (LC)	KH,VN		Limnonectes poilani	FALSE	FALSE	FALSE	FALSE	FALSE	FALSE	FALSE	FALSE	FALSE	TRUE	TRUE	Limnonectes poilani (Bourret, 1942)	1942
Anura	Dicroglossidae	Dicroglossinae	Limnonectes	shompenorum	Limnonectes shompenorum			Limnonectes shompenorum			Least Concern (LC)	IN		Limnonectes shompenorum	FALSE	FALSE	FALSE	FALSE	FALSE	FALSE	FALSE	FALSE	FALSE	TRUE	TRUE	Limnonectes shompenorum Das, 1996	1996
Anura	Dicroglossidae	Dicroglossinae	Limnonectes	taylori	Limnonectes taylori			Limnonectes taylori			Least Concern (LC)	CN,LA,MM,TH		Limnonectes taylori	FALSE	FALSE	FALSE	FALSE	FALSE	FALSE	FALSE	FALSE	FALSE	TRUE	TRUE	Limnonectes taylori Matsui, Panha, Khonsue, and Kuraishi, 2010	2010
Anura	Dicroglossidae	Dicroglossinae	Limnonectes	visayanus	Limnonectes visayanus			Limnonectes visayanus			Vulnerable (VU)	PH		Limnonectes visayanus	FALSE	FALSE	FALSE	FALSE	FALSE	FALSE	FALSE	FALSE	FALSE	TRUE	TRUE	Limnonectes visayanus (Inger, 1954)	1954
Anura	Dicroglossidae	Dicroglossinae	Limnonectes	woodworthi	Limnonectes woodworthi			Limnonectes woodworthi			Least Concern (LC)	PH		Limnonectes woodworthi	FALSE	FALSE	FALSE	FALSE	FALSE	FALSE	FALSE	FALSE	FALSE	TRUE	TRUE	Limnonectes woodworthi (Taylor, 1923)	1923
Caudata	Salamandridae	Pleurodelinae	Lissotriton	boscai	Lissotriton boscai	Meinus	Bosca's newt, Spanischer wassermolch, boscas wassermolch, tritÃÂ³n ibÃÂ©rico, tritÃÂ³n de BoscÃÂ¡, tritÃÂ£o-de-la-ventre-laranja, Boscas vandsalamander, hispaania vesilik, triton de Bosca, tritone di BoscÃÂ¡, spaanse watersa	Lissotriton boscai	Triturus boscai	Triturus boscai	Least Concern (LC)	ES,PT	Populations in SE Portugal are genetically distinct. Raffaelli and Dubois (2009; Alytes) resurrected Lissotriton maltzani for them. Sequeira et al. (2020, J Evo Biol DOI: 10.1111/jeb.13562) studied the hybrid zone between genetic units in detail, con	Lissotriton boscai	TRUE	FALSE	TRUE	FALSE	FALSE	TRUE	FALSE	FALSE	FALSE	FALSE	TRUE	Lissotriton boscai (Lataste, 1879)	1879
Caudata	Salamandridae	Pleurodelinae	Lissotriton	helveticus	Lissotriton helveticus	Lissotriton	Palmate newt, fadenmolch, leistenmolch, tritÃÂ³n palmeado, tritÃÂ£o-palmado, tritÃÂ£o-de-patas-espalmadas, tritÃÂ³ palmat, madfall balmwyddog, trÃÂ¥dvandsalamander, niitvesilik, uhandre palmatua, triton palmÃÂ©, tritone palm	Lissotriton helveticus	Triturus helveticus	Triturus helveticus	Least Concern (LC)	BE,CZ,FR,DE,IT,LU,NL,PT,ES,CH,GB		Lissotriton helveticus	TRUE	TRUE	TRUE	FALSE	FALSE	TRUE	FALSE	FALSE	FALSE	FALSE	TRUE	Lissotriton helveticus (Razoumovsky, 1789)	1789
Caudata	Salamandridae	Pleurodelinae	Lissotriton	italicus	Lissotriton italicus	Lissotriton	Italian newt, Italienischer wassermolch, italiniescher teichmolch, tritone italico, italiensk vandsalamander, itaalia tÃÂ¤hnikvesilik, tritÃÂ³n italiano, triton italien, italiaanse watersalamander, italianvesilisko, italiensk vattensalamander	Lissotriton italicus	Triturus italicus, Molge italica, Triton italicus	Triturus italicus, Molge italica, Triton italicus	Least Concern (LC)	IT		Lissotriton italicus	TRUE	TRUE	TRUE	FALSE	FALSE	TRUE	FALSE	FALSE	FALSE	FALSE	TRUE	Lissotriton italicus (Peracca, 1898)	1898
Caudata	Salamandridae	Pleurodelinae	Lissotriton	montandoni	Lissotriton montandoni	Lissotriton	Carpathian Newt	Lissotriton montandoni	Triturus montandoni, Triton montandoni, Diemictylus montandoni	Triturus montandoni, Triton montandoni, Diemictylus montandoni	Least Concern (LC)	SK,UA,PL,CZ,RO		Lissotriton montandoni	TRUE	TRUE	TRUE	FALSE	FALSE	TRUE	FALSE	FALSE	TRUE	TRUE	TRUE	Lissotriton montandoni (Boulenger, 1880)	1880
Caudata	Salamandridae	Pleurodelinae	Lissotriton	vulgaris	Lissotriton vulgaris	Lissotriton	Smooth Newt	Lissotriton vulgaris	Triturus vulgaris, Lacerta vulgaris, Lophinus vulgaris	Triturus vulgaris, Lacerta vulgaris, Lophinus vulgaris	Least Concern (LC)	AL,AU,AT,BY,BE,BA,BG,HR,CZ,DK,EE,FI,FR,DE,GR,HU,IE,IT,KZ,LV,LT,LU,MK,MD,ME,NL,NO,PL,RO,RU,RS,SK,SI,SE,CH,TR,UA,GB		Lissotriton vulgaris	TRUE	TRUE	TRUE	FALSE	FALSE	TRUE	FALSE	FALSE	TRUE	TRUE	TRUE	Lissotriton vulgaris (Linnaeus, 1758)	1758
Anura	Leptodactylidae	Leptodactylinae	Lithodytes	lineatus	Lithodytes lineatus		Painted Ant-nest Frog	Lithodytes lineatus	Leptodactylus hemidactyloides, Rana lineata, Leptodactylus lineatus	Leptodactylus hemidactyloides, Rana lineata, Leptodactylus lineatus	Least Concern (LC)	BO,BR,CO,EC,GF,GY,PE,SR,VE		Lithodytes lineatus	FALSE	FALSE	FALSE	TRUE	FALSE	TRUE	FALSE	FALSE	FALSE	FALSE	TRUE	Lithodytes lineatus (Schneider, 1799)	1799
Anura	Hylidae	Pelodryadinae	Litoria	aurea	Litoria aurea		Green and Golden Bell Frog	Litoria aurea			Vulnerable (VU)	AU,NC,NZ,VU		Litoria aurea	TRUE	TRUE	TRUE	TRUE	FALSE	TRUE	FALSE	FALSE	TRUE	TRUE	TRUE	Ranoidea aurea (Lesson, 1829)	1829
Anura	Hylidae	Pelodryadinae	Litoria	bicolor	Litoria bicolor		Northern Dwarf Tree Frog, Green Reed Frog	Litoria bicolor			Least Concern (LC)	PG,ID,AU		Litoria bicolor	FALSE	FALSE	FALSE	FALSE	FALSE	FALSE	FALSE	FALSE	TRUE	FALSE	TRUE	Litoria bicolor (Gray, 1842)	1842
Anura	Hylidae	Pelodryadinae	Litoria	caerulea	Litoria caerulea		Green Tree Frog	Litoria caerulea			Least Concern (LC)	AU,ID,PG		Litoria caerulea	TRUE	TRUE	TRUE	TRUE	FALSE	TRUE	FALSE	FALSE	TRUE	TRUE	TRUE	Ranoidea caerulea (White, 1790)	1790
Anura	Hylidae	Pelodryadinae	Litoria	chloris	Litoria chloris		Red-eyed Tree Frog	Litoria chloris			Least Concern (LC)	AU		Litoria chloris	TRUE	FALSE	TRUE	FALSE	FALSE	TRUE	FALSE	FALSE	TRUE	FALSE	TRUE	Ranoidea chloris (Boulenger, 1892)	1892
Anura	Hylidae	Pelodryadinae	Litoria	citropa	Litoria citropa		Blue Mountains Tree Frog	Litoria citropa	Litoria jenolanensis, Dendrohyas citropa, Hyla jenolanensis	Litoria jenolanensis, Dendrohyas citropa, Hyla jenolanensis	Least Concern (LC)	AU		Litoria citropa	FALSE	FALSE	FALSE	FALSE	FALSE	FALSE	FALSE	FALSE	TRUE	FALSE	TRUE	Ranoidea citropa (Péron, 1807)	1807
Anura	Hylidae	Pelodryadinae	Litoria	eucnemis	Litoria eucnemis		Fringed Tree Frog	Litoria eucnemis			Least Concern (LC)	PG,ID,AU		Litoria eucnemis	FALSE	FALSE	FALSE	TRUE	FALSE	TRUE	FALSE	FALSE	FALSE	FALSE	TRUE	Ranoidea eucnemis (Lönnberg, 1900)	1900
Anura	Hylidae	Pelodryadinae	Litoria	ewingii	Litoria ewingii		Whistling Tree Frog, Ewing's Tree Frog, Brown Tree Frog, Southern Brown Tree Frog	Litoria ewingii			Least Concern (LC)	NZ,AU		Litoria ewingii	FALSE	FALSE	FALSE	FALSE	FALSE	FALSE	FALSE	FALSE	TRUE	TRUE	TRUE	Litoria ewingii (Duméril and Bibron, 1841)	1841
Anura	Hylidae	Pelodryadinae	Litoria	exophthalmia	Litoria exophthalmia			Litoria exophthalmia			Least Concern (LC)	PG		Litoria exophthalmia	FALSE	FALSE	FALSE	FALSE	FALSE	FALSE	FALSE	FALSE	TRUE	FALSE	TRUE	Ranoidea exophthalmia (Tyler, Davies, and Aplin, 1986)	1986
Anura	Hylidae	Pelodryadinae	Litoria	fallax	Litoria fallax		Eastern Dwarf Tree Frog	Litoria fallax			Least Concern (LC)	AU,GU		Litoria fallax	TRUE	FALSE	TRUE	FALSE	FALSE	TRUE	FALSE	FALSE	TRUE	FALSE	TRUE	Litoria fallax (Peters, 1880)	1880
Anura	Hylidae	Pelodryadinae	Litoria	gilleni	Litoria gilleni		Centralian Tree Frog	Litoria gilleni			Least Concern (LC)	AU		Litoria gilleni	FALSE	FALSE	FALSE	FALSE	FALSE	FALSE	FALSE	FALSE	TRUE	FALSE	TRUE	Ranoidea gilleni (Spencer, 1896)	1896
Anura	Hylidae	Pelodryadinae	Litoria	gracilenta	Litoria gracilenta		Dainty Green Tree Frog	Litoria gracilenta			Least Concern (LC)	PG,AU		Litoria gracilenta	FALSE	FALSE	FALSE	FALSE	FALSE	FALSE	FALSE	FALSE	TRUE	FALSE	TRUE	Ranoidea gracilenta (Peters, 1869)	1869
Anura	Hylidae	Pelodryadinae	Litoria	graminea	Litoria graminea			Litoria graminea			Data Deficient (DD)	PG,ID		Litoria graminea	FALSE	FALSE	FALSE	TRUE	FALSE	TRUE	FALSE	FALSE	FALSE	FALSE	TRUE	Boulenger, 1905	1905
Anura	Hylidae	Pelodryadinae	Litoria	infrafrenata	Litoria infrafrenata		White-lipped Tree Frog	Nyctimystes infrafrenatus	Nyctimystes infrafrenatus		Least Concern (LC)	PG,ID,AU		Litoria infrafrenata	TRUE	TRUE	TRUE	TRUE	FALSE	TRUE	FALSE	FALSE	TRUE	TRUE	TRUE	Günther, 1867	1867
Anura	Hylidae	Pelodryadinae	Litoria	lesueurii	Litoria lesueurii		Lesueur's Frog	Litoria lesueurii			Least Concern (LC)	AU		Litoria lesueurii	FALSE	FALSE	FALSE	FALSE	FALSE	FALSE	FALSE	FALSE	TRUE	FALSE	TRUE	Litoria freycineti Tschudi, 1838	1838
Anura	Hylidae	Pelodryadinae	Litoria	moorei	Litoria moorei		Western Green and Golden Bell Frog	Litoria moorei			Least Concern (LC)	AU		Litoria moorei	FALSE	FALSE	FALSE	FALSE	FALSE	FALSE	FALSE	FALSE	TRUE	FALSE	TRUE	Ranoidea moorei (Copland, 1957)	1957
Anura	Hylidae	Pelodryadinae	Litoria	nasuta	Litoria nasuta		Rocket Frog	Litoria nasuta			Least Concern (LC)	PG,AU		Litoria nasuta	FALSE	FALSE	FALSE	FALSE	FALSE	FALSE	FALSE	FALSE	TRUE	TRUE	TRUE	Litoria nasuta (Gray, 1842)	1842
Anura	Hylidae	Pelodryadinae	Litoria	nigropunctata	Litoria nigropunctata			Litoria nigropunctata			Least Concern (LC)	PG,ID		Litoria nigropunctata	FALSE	FALSE	FALSE	TRUE	FALSE	TRUE	FALSE	FALSE	FALSE	FALSE	TRUE	Litoria nigropunctata (Meyer, 1875)	1875
Anura	Hylidae	Pelodryadinae	Litoria	peronii	Litoria peronii		Peron's Tree Frog	Litoria peronii			Least Concern (LC)	AU		Litoria peronii	FALSE	FALSE	FALSE	FALSE	FALSE	FALSE	FALSE	FALSE	TRUE	FALSE	TRUE	Litoria peronii (Tschudi, 1838)	1838
Anura	Hylidae	Pelodryadinae	Litoria	phyllochroa	Litoria phyllochroa		Leaf Green Tree Frog	Litoria phyllochroa	Hyla phyllochroa	Hyla phyllochroa	Least Concern (LC)	AU		Litoria phyllochroa	FALSE	FALSE	FALSE	FALSE	FALSE	FALSE	FALSE	FALSE	TRUE	FALSE	TRUE	Ranoidea phyllochroa (Günther, 1863)	1863
Anura	Hylidae	Pelodryadinae	Litoria	quadrilineata	Litoria quadrilineata			Litoria quadrilineata			Vulnerable (VU)	PG,ID		Litoria quadrilineata	FALSE	FALSE	FALSE	FALSE	FALSE	FALSE	FALSE	FALSE	FALSE	TRUE	TRUE	Litoria quadrilineata Tyler and Parker, 1974	1974
Anura	Hylidae	Pelodryadinae	Litoria	raniformis	Litoria raniformis		Southern Bell Frog, Warty Bell Frog, Green and Gold Frog, Southern Bell Frog	Litoria raniformis			Endangered (EN)	AU,NZ		Litoria raniformis	FALSE	FALSE	FALSE	FALSE	FALSE	FALSE	FALSE	FALSE	TRUE	TRUE	TRUE	Ranoidea raniformis (Keferstein, 1867)	1867
Anura	Hylidae	Pelodryadinae	Litoria	rothii	Litoria rothii		Roth's Tree Frog, Northern Laughing Tree Frog	Litoria rothii			Least Concern (LC)	PG,AU		Litoria rothii	FALSE	FALSE	FALSE	FALSE	FALSE	FALSE	FALSE	FALSE	TRUE	FALSE	TRUE	Litoria rothii (De Vis, 1884)	1884
Anura	Hylidae	Pelodryadinae	Litoria	rubella	Litoria rubella		Desert Tree Frog	Litoria rubella			Least Concern (LC)	PG,ID,AU		Litoria rubella	TRUE	FALSE	TRUE	TRUE	FALSE	TRUE	FALSE	FALSE	TRUE	FALSE	TRUE	Litoria rubella (Gray, 1842)	1842
Anura	Hylidae	Pelodryadinae	Litoria	splendida	Litoria splendida		Splendid Treefrog	Litoria splendida			Least Concern (LC)	AU		Litoria splendida	FALSE	FALSE	FALSE	FALSE	FALSE	FALSE	FALSE	FALSE	TRUE	FALSE	TRUE	Ranoidea splendida (Tyler, Davies, and Martin, 1977)	1977
Anura	Hylidae	Pelodryadinae	Litoria	thesaurensis	Litoria thesaurensis			Litoria thesaurensis			Least Concern (LC)	SB,PG		Litoria thesaurensis	TRUE	TRUE	TRUE	FALSE	FALSE	TRUE	FALSE	FALSE	FALSE	FALSE	TRUE	Litoria thesaurensis (Peters, 1877)	1877
Anura	Hylidae	Pelodryadinae	Litoria	tyleri	Litoria tyleri		Tyler's Tree Frog	Litoria tyleri			Least Concern (LC)	AU		Litoria tyleri	FALSE	FALSE	FALSE	FALSE	FALSE	FALSE	FALSE	FALSE	TRUE	FALSE	TRUE	Litoria tyleri Martin, Watson, Gartside, Littlejohn, and Loftus-Hills, 1979	1979
Anura	Hylidae	Pelodryadinae	Litoria	verreauxii	Litoria verreauxii		Verreaux's Tree Frog	Litoria verreauxii			Least Concern (LC)	AU		Litoria verreauxii	FALSE	FALSE	FALSE	FALSE	FALSE	FALSE	FALSE	FALSE	TRUE	FALSE	TRUE	Litoria verreauxii (Duméril, 1853)	1853
Anura	Hylidae	Pelodryadinae	Litoria	xanthomera	Litoria xanthomera		Orange-thighed Frog	Litoria xanthomera			Least Concern (LC)	AU		Litoria xanthomera	FALSE	FALSE	FALSE	FALSE	FALSE	FALSE	FALSE	FALSE	TRUE	FALSE	TRUE	Ranoidea xanthomera (Davies, McDonald, and Adams, 1986)	1986
Caudata	Hynobiidae	Hynobiinae	Liua	shihi	Liua shihi	Liua	Wushan Salamander	Liua shihi	Ranodon shihi	Ranodon shihi	Near Threatened (NT)	CN	Retained in Ranodon by Fei, Ye, Jiang 2012 Colored Atlas of Chinese Amphibians and their Distributions, ignoring Zhang et al. 2006 PNAS and Zheng et al. 2011 Mol Biol Evol 28:2521-2535.	Liua shihi	FALSE	TRUE	TRUE	FALSE	FALSE	TRUE	FALSE	FALSE	FALSE	TRUE	TRUE	Liua shihi (Liu, 1950)	1950
Caudata	Hynobiidae	Hynobiinae	Liua	tsinpaensis	Liua tsinpaensis	Tsinpa	Tsinpa Salamander	Liua tsinpaensis	Pseudohynobius tsinpaensis, Ranodon tsinpaensis	Ranodon tsinpaensis	Vulnerable (VU)	CN	Placed in Pseudohynobius by Fei, Ye, Jiang 2012 Colored Atlas of Chinese Amphibians and their Distributions, who ignored Zhang et al. 2006 PNAS and Zheng et al. 2011 Mol Biol Evol 28:2521-2535. Dubois & Raffaelli 2012 Alytes also ignored these stud	Liua tsinpaensis	FALSE	FALSE	FALSE	FALSE	FALSE	FALSE	FALSE	FALSE	FALSE	TRUE	TRUE	Liua tsinpaensis (Liu and Hu, 1966)	1966
Caudata	Salamandridae	Salamandrinae	Lyciasalamandra	helverseni	Lyciasalamandra helverseni			Lyciasalamandra helverseni			Vulnerable (VU)	GR		Lyciasalamandra helverseni	FALSE	FALSE	FALSE	FALSE	FALSE	FALSE	FALSE	FALSE	FALSE	TRUE	TRUE	Lyciasalamandra helverseni (Pieper, 1963)	1963
Anura	Hylidae	Hylinae	Lysapsus	laevis	Lysapsus laevis			Lysapsus laevis	Lysapsus limellus laevis	Lysapsus laevis, Lysapsus limellus laevis	Least Concern (LC)	GY,BR,BO		Lysapsus laevis	FALSE	FALSE	FALSE	TRUE	FALSE	TRUE	FALSE	FALSE	FALSE	FALSE	TRUE	Lysapsus laevis (Parker, 1935)	1935
Anura	Mantellidae	Mantellinae	Mantella	aurantiaca	Mantella aurantiaca		Golden Mantella	Mantella aurantiaca			Critically Endangered (CR)	MG		Mantella aurantiaca	TRUE	TRUE	TRUE	TRUE	TRUE	TRUE	TRUE	II	TRUE	TRUE	TRUE	Mantella aurantiaca Mocquard, 1900	1900
Anura	Mantellidae	Mantellinae	Mantella	baroni	Mantella baroni			Mantella baroni			Least Concern (LC)	MG		Mantella baroni	TRUE	TRUE	TRUE	TRUE	TRUE	TRUE	TRUE	II	TRUE	TRUE	TRUE	Mantella baroni Boulenger, 1888	1888
Anura	Mantellidae	Mantellinae	Mantella	bernhardi	Mantella bernhardi			Mantella bernhardi			Vulnerable (VU)	MG		Mantella bernhardi	TRUE	TRUE	TRUE	TRUE	TRUE	TRUE	TRUE	II	TRUE	TRUE	TRUE	Mantella bernhardi Vences, Glaw, Peyrieras, Böhme, and Busse, 1994	1994
Anura	Mantellidae	Mantellinae	Mantella	betsileo	Mantella betsileo			Mantella betsileo			Least Concern (LC)	MG		Mantella betsileo	TRUE	TRUE	TRUE	TRUE	TRUE	TRUE	TRUE	II	TRUE	TRUE	TRUE	Mantella betsileo (Grandidier, 1872)	1872
Anura	Mantellidae	Mantellinae	Mantella	cowanii	Mantella cowanii		Harlequin Mantella	Mantella cowanii			Endangered (EN)	MG		Mantella cowanii	FALSE	FALSE	FALSE	TRUE	TRUE	TRUE	TRUE	II	TRUE	TRUE	TRUE	Mantella cowanii Boulenger, 1882	1882
Anura	Mantellidae	Mantellinae	Mantella	crocea	Mantella crocea			Mantella crocea			Vulnerable (VU)	MG		Mantella crocea	TRUE	FALSE	TRUE	TRUE	TRUE	TRUE	TRUE	II	TRUE	TRUE	TRUE	Mantella crocea Pintak and Böhme, 1990	1990
Anura	Mantellidae	Mantellinae	Mantella	ebenaui	Mantella ebenaui			Mantella ebenaui			Least Concern (LC)	MG		Mantella ebenaui	TRUE	FALSE	TRUE	TRUE	TRUE	TRUE	TRUE	II	FALSE	TRUE	TRUE	Mantella ebenaui (Boettger, 1880)	1880
Anura	Mantellidae	Mantellinae	Mantella	expectata	Mantella expectata		Blue-legged mantella, expected mantella, canyon mantella	Mantella expectata			Endangered (EN)	MG		Mantella expectata	TRUE	TRUE	TRUE	TRUE	TRUE	TRUE	TRUE	II	TRUE	TRUE	TRUE	Mantella expectata Busse and Böhme, 1992	1992
Anura	Mantellidae	Mantellinae	Mantella	haraldmeieri	Mantella haraldmeieri			Mantella haraldmeieri			Endangered (EN)	MG		Mantella haraldmeieri	FALSE	TRUE	TRUE	TRUE	TRUE	TRUE	TRUE	II	TRUE	TRUE	TRUE	Mantella haraldmeieri Busse, 1981	1981
Anura	Mantellidae	Mantellinae	Mantella	laevigata	Mantella laevigata		Malagasy Climbing Mantella	Mantella laevigata			Least Concern (LC)	MG		Mantella laevigata	TRUE	TRUE	TRUE	TRUE	TRUE	TRUE	TRUE	II	TRUE	TRUE	TRUE	Mantella laevigata Methuen and Hewitt, 1913	1913
Anura	Mantellidae	Mantellinae	Mantella	madagascariensis	Mantella madagascariensis			Mantella madagascariensis			Vulnerable (VU)	MG		Mantella madagascariensis	TRUE	TRUE	TRUE	TRUE	TRUE	TRUE	TRUE	II	TRUE	TRUE	TRUE	Mantella madagascariensis (Grandidier, 1872)	1872
Anura	Mantellidae	Mantellinae	Mantella	manery	Mantella manery			Mantella manery			Vulnerable (VU)	MG		Mantella manery	FALSE	FALSE	FALSE	FALSE	TRUE	TRUE	TRUE	II	FALSE	FALSE	TRUE	Mantella manery Vences, Glaw, and Böhme, 1999	1999
Anura	Mantellidae	Mantellinae	Mantella	milotympanum	Mantella milotympanum			Mantella milotympanum			Critically Endangered (CR)	MG		Mantella milotympanum	FALSE	TRUE	TRUE	TRUE	TRUE	TRUE	TRUE	II	TRUE	TRUE	TRUE	Mantella milotympanum Staniszewski, 1996	1996
Anura	Mantellidae	Mantellinae	Mantella	nigricans	Mantella nigricans			Mantella nigricans			Least Concern (LC)	MG		Mantella nigricans	TRUE	TRUE	TRUE	TRUE	TRUE	TRUE	TRUE	II	TRUE	TRUE	TRUE	Mantella nigricans Guibé, 1978	1978
Anura	Mantellidae	Mantellinae	Mantella	pulchra	Mantella pulchra			Mantella pulchra			Near Threatened (NT)	MG		Mantella pulchra	TRUE	TRUE	TRUE	TRUE	TRUE	TRUE	TRUE	II	TRUE	TRUE	TRUE	Mantella pulchra Parker, 1925	1925
Anura	Mantellidae	Mantellinae	Mantella	viridis	Mantella viridis			Mantella viridis			Endangered (EN)	MG		Mantella viridis	TRUE	TRUE	TRUE	TRUE	TRUE	TRUE	TRUE	II	TRUE	TRUE	TRUE	Mantella viridis Pintak and Böhme, 1988	1988
Anura	Mantellidae	Mantellinae	Mantidactylus	grandidieri	Mantidactylus grandidieri	Mantidactylus		Mantidactylus grandidieri			Least Concern (LC)	MG		Mantidactylus grandidieri	FALSE	FALSE	FALSE	FALSE	FALSE	FALSE	FALSE	FALSE	FALSE	TRUE	TRUE	Mantidactylus grandidieri Mocquard, 1895	1895
Anura	Mantellidae	Mantellinae	Mantidactylus	guttulatus	Mantidactylus guttulatus	Mantidactylus		Mantidactylus guttulatus			Least Concern (LC)	MG		Mantidactylus guttulatus	FALSE	FALSE	FALSE	FALSE	FALSE	FALSE	FALSE	FALSE	FALSE	TRUE	TRUE	Mantidactylus guttulatus (Boulenger, 1881)	1881
Anura	Mantellidae	Mantellinae	Mantidactylus	lugubris	Mantidactylus lugubris	Hylobatrachus		Mantidactylus lugubris			Least Concern (LC)	MG		Mantidactylus lugubris	FALSE	TRUE	TRUE	FALSE	FALSE	TRUE	FALSE	FALSE	FALSE	FALSE	TRUE	Mantidactylus lugubris (Duméril, 1853)	1853
Anura	Microhylidae	Asterophryinae	Mantophryne	lateralis	Mantophryne lateralis			Mantophryne lateralis			Least Concern (LC)	PG,ID		Mantophryne lateralis	FALSE	FALSE	FALSE	TRUE	FALSE	TRUE	FALSE	FALSE	FALSE	FALSE	TRUE	Mantophryne lateralis Boulenger, 1897	1897
Anura	Megophryidae	Megophryinae	Megophrys	montana	Megophrys montana	Megophrys	Asian Horned Frog; Asian Spadefoot Toad, Javan Horned Frog	Megophrys montana			Least Concern (LC)	ID		Megophrys montana	TRUE	FALSE	TRUE	TRUE	FALSE	TRUE	FALSE	FALSE	TRUE	TRUE	TRUE	Megophrys montana Kuhl and Van Hasselt, 1822	1822
Anura	Bufonidae		Melanophryniscus	admirabilis	Melanophryniscus admirabilis			Melanophryniscus admirabilis			Critically Endangered (CR)	BR		Melanophryniscus admirabilis	FALSE	FALSE	FALSE	FALSE	FALSE	FALSE	FALSE	FALSE	FALSE	TRUE	TRUE	Melanophryniscus admirabilis Di-Bernardo, Maneyro, and Grillo, 2006	2006
Anura	Bufonidae		Melanophryniscus	atroluteus	Melanophryniscus atroluteus			Melanophryniscus atroluteus			Least Concern (LC)	AR,BR,PY,UY		Melanophryniscus atroluteus	FALSE	TRUE	TRUE	FALSE	FALSE	TRUE	FALSE	FALSE	FALSE	TRUE	TRUE	Melanophryniscus atroluteus (Miranda-Ribeiro, 1920)	1920
Anura	Bufonidae		Melanophryniscus	cambaraensis	Melanophryniscus cambaraensis			Melanophryniscus cambaraensis			Data Deficient (DD)	BR		Melanophryniscus cambaraensis	FALSE	FALSE	FALSE	FALSE	FALSE	FALSE	FALSE	FALSE	FALSE	TRUE	TRUE	Melanophryniscus cambaraensis Braun and Braun, 1979	1979
Anura	Bufonidae		Melanophryniscus	fulvoguttatus	Melanophryniscus fulvoguttatus			Melanophryniscus fulvoguttatus			Least Concern (LC)	AR,BR,PY		Melanophryniscus fulvoguttatus	FALSE	TRUE	TRUE	FALSE	FALSE	TRUE	FALSE	FALSE	FALSE	TRUE	TRUE	Melanophryniscus fulvoguttatus (Mertens, 1937)	1937
Anura	Bufonidae		Melanophryniscus	klappenbachi	Melanophryniscus klappenbachi			Melanophryniscus klappenbachi			Least Concern (LC)	AR,PY		Melanophryniscus klappenbachi	TRUE	TRUE	TRUE	FALSE	FALSE	TRUE	FALSE	FALSE	FALSE	TRUE	TRUE	Melanophryniscus klappenbachi Prigioni and Langone, 2000	2000
Anura	Bufonidae		Melanophryniscus	stelzneri	Melanophryniscus stelzneri			Melanophryniscus stelzneri			Least Concern (LC)	PY,BR,AR		Melanophryniscus stelzneri	TRUE	TRUE	TRUE	TRUE	FALSE	TRUE	FALSE	FALSE	TRUE	TRUE	TRUE	Melanophryniscus stelzneri (Weyenbergh, 1875)	1875
Anura	Bufonidae		Melanophryniscus	tumifrons	Melanophryniscus tumifrons			Melanophryniscus tumifrons			Least Concern (LC)	BR,AR		Melanophryniscus tumifrons	FALSE	FALSE	FALSE	FALSE	FALSE	FALSE	FALSE	FALSE	FALSE	TRUE	TRUE	Melanophryniscus tumifrons (Boulenger, 1905)	1905
Anura	Ranidae		Meristogenys	kinabaluensis	Meristogenys kinabaluensis			Meristogenys kinabaluensis			Near Threatened (NT)	MY		Meristogenys kinabaluensis	FALSE	FALSE	FALSE	FALSE	FALSE	FALSE	FALSE	FALSE	FALSE	TRUE	TRUE	Meristogenys kinabaluensis (Inger, 1966)	1966
Anura	Ranidae		Meristogenys	orphnocnemis	Meristogenys orphnocnemis			Meristogenys orphnocnemis			Least Concern (LC)	MY,ID		Meristogenys orphnocnemis	FALSE	FALSE	FALSE	FALSE	FALSE	FALSE	FALSE	FALSE	FALSE	TRUE	TRUE	Meristogenys orphnocnemis (Matsui, 1986)	1986
Caudata	Salamandridae	Salamandrinae	Mertensiella	caucasica	Mertensiella caucasica		Caucasian Salamander	Mertensiella caucasica			Vulnerable (VU)	TR,GE		Mertensiella caucasica	FALSE	TRUE	TRUE	FALSE	FALSE	TRUE	FALSE	FALSE	FALSE	TRUE	TRUE	Mertensiella caucasica (Waga, 1876)	1876
Anura	Microhylidae	Microhylinae	Microhyla	berdmorei	Microhyla berdmorei			Microhyla berdmorei	Microhyla fowleri		Least Concern (LC)	KH,CN,IN,ID,LA,MY,MM,TH,VN		Microhyla berdmorei	FALSE	FALSE	FALSE	TRUE	FALSE	TRUE	FALSE	FALSE	FALSE	FALSE	TRUE	Microhyla berdmorei (Blyth, 1856)	1856
Anura	Microhylidae	Microhylinae	Microhyla	butleri	Microhyla butleri		Butler's Narrow-mouth Frog	Microhyla butleri			Least Concern (LC)	KH,CN,HK,IN,LA,MY,MM,SG,TW,TH,VN		Microhyla butleri	TRUE	FALSE	TRUE	FALSE	FALSE	TRUE	FALSE	FALSE	TRUE	FALSE	TRUE	Microhyla butleri Boulenger, 1900	1900
Anura	Microhylidae	Microhylinae	Microhyla	fissipes	Microhyla fissipes		Ornate Chorus Frog, Ornate Narrow-mouthed Frog, Ornamented Pygmy Frog, Oriental Ornate Narrow-mouth Frog	Microhyla fissipes			Least Concern (LC)	KH,CN,HK,LA,MY,MM,SG,TH,VN	Resurrected from synonomy of Microhyla ornata by Matsui, M., H. Ito, T. Shimada, H. Ota, S. Saidapur, W. Khonsue, T. Tanaka-Ueno, and G-f. Wu. 2005. Taxonomic relationships within the Pan-Oriental narrow-mouth toad Microhyla ornata as revealed by mtDNA a	Microhyla fissipes	TRUE	FALSE	TRUE	TRUE	FALSE	TRUE	FALSE	FALSE	FALSE	FALSE	TRUE	Microhyla fissipes Boulenger, 1884	1884
Anura	Microhylidae	Microhylinae	Microhyla	heymonsi	Microhyla heymonsi		Black-sided Narrow-mouth Frog	Microhyla heymonsi			Least Concern (LC)	KH,CN,IN,ID,LA,MY,MM,SG,TW,TH,VN		Microhyla heymonsi	TRUE	TRUE	TRUE	TRUE	FALSE	TRUE	FALSE	FALSE	FALSE	TRUE	TRUE	Microhyla heymonsi Vogt, 1911	1911
Anura	Microhylidae	Microhylinae	Microhyla	mixtura	Microhyla mixtura			Microhyla mixtura			Least Concern (LC)	CN		Microhyla mixtura	FALSE	FALSE	FALSE	FALSE	FALSE	FALSE	FALSE	FALSE	FALSE	TRUE	TRUE	Microhyla mixtura Liu and Hu, 1966	1966
Anura	Microhylidae	Microhylinae	Microhyla	ornata	Microhyla ornata		Ornate Narrow-Mouthed Toad	Microhyla ornata			Least Concern (LC)	BD,BT,IN,MM,NP,PK,LK		Microhyla ornata	FALSE	TRUE	TRUE	TRUE	FALSE	TRUE	FALSE	FALSE	FALSE	FALSE	TRUE	Microhyla ornata (Duméril and Bibron, 1841)	1841
Anura	Microhylidae	Microhylinae	Microhyla	pulchra	Microhyla pulchra			Microhyla pulchra			Least Concern (LC)	KH,CN,GU,HK,LA,MO,TH,VN		Microhyla pulchra	TRUE	TRUE	TRUE	TRUE	FALSE	TRUE	FALSE	FALSE	TRUE	TRUE	TRUE	Microhyla pulchra (Hallowell, 1861)	1861
Anura	Microhylidae	Microhylinae	Micryletta	inornata	Micryletta inornata			Micryletta inornata			Least Concern (LC)	KH,CN,ID,LA,MY,MM,TW,TH,VN		Micryletta inornata	FALSE	FALSE	FALSE	TRUE	FALSE	TRUE	FALSE	FALSE	FALSE	FALSE	TRUE	Micryletta inornata (Boulenger, 1890)	1890
Anura	Dicroglossidae	Dicroglossinae	Minervarya	nepalensis	Minervarya nepalensis			Fejervarya nepalensis	Fejervarya nepalensis		Least Concern (LC)	BD,BT,IN,NP		Minervarya nepalensis	FALSE	FALSE	FALSE	FALSE	FALSE	FALSE	FALSE	FALSE	FALSE	TRUE	TRUE	Minervarya nepalensis (Dubois, 1975)	1975
Anura	Dicroglossidae	Dicroglossinae	Minervarya	teraiensis	Minervarya teraiensis			Fejervarya teraiensis	Fejervarya teraiensis		Least Concern (LC)	BD,BT,IN,NP		Minervarya teraiensis	FALSE	FALSE	FALSE	FALSE	FALSE	FALSE	FALSE	FALSE	FALSE	TRUE	TRUE	Minervarya teraiensis (Dubois, 1984)	1984
Anura	Dendrobatidae	Dendrobatinae	Minyobates	steyermarki	Minyobates steyermarki		Demonic Poison Frog or YapacanaÃ¢â¬â¢s Little Red Frog	Minyobates steyermarki	Dendrobates steyermarki	Dendrobates steyermarki	Critically Endangered (CR)	VE		Minyobates steyermarki	FALSE	FALSE	FALSE	FALSE	FALSE	FALSE	TRUE	II	FALSE	TRUE	TRUE	Minyobates steyermarki (Rivero, 1971)	1971
Anura	Myobatrachidae	Limnodynastinae	Mixophyes	fasciolatus	Mixophyes fasciolatus		Great Barred-Frog	Mixophyes fasciolatus			Least Concern (LC)	AU		Mixophyes fasciolatus	FALSE	FALSE	FALSE	FALSE	FALSE	FALSE	FALSE	FALSE	TRUE	FALSE	TRUE	Mixophyes fasciolatus Günther, 1864	1864
Anura	Myobatrachidae	Limnodynastinae	Mixophyes	iteratus	Mixophyes iteratus		Giant Barred-Frog,Giant Barred River-Frog	Mixophyes iteratus			Endangered (EN)	AU		Mixophyes iteratus	FALSE	FALSE	FALSE	FALSE	FALSE	FALSE	FALSE	FALSE	TRUE	FALSE	TRUE	Mixophyes iteratus Straughan, 1968	1968
Anura	Bufonidae		Nannophryne	cophotis	Nannophryne cophotis			Nannophryne cophotis	Bufo cophotis	Bufo cophotis	Least Concern (LC)	PE		Nannophryne cophotis	FALSE	FALSE	FALSE	FALSE	FALSE	FALSE	FALSE	FALSE	FALSE	TRUE	TRUE	Nannophryne cophotis (Boulenger, 1900)	1900
Anura	Bufonidae		Nannophryne	variegata	Nannophryne variegata			Nannophryne variegata	Bufo variegatus	Bufo variegatus	Least Concern (LC)	AR,CL		Nannophryne variegata	TRUE	FALSE	TRUE	FALSE	FALSE	TRUE	FALSE	FALSE	FALSE	FALSE	TRUE	Nannophryne variegata Günther, 1870	1870
Anura	Dicroglossidae	Dicroglossinae	Nanorana	arnoldi	Nanorana arnoldi			Nanorana arnoldi	Paa arnoldi, Chaparana arnoldi	Paa arnoldi, Chaparana arnoldi	Near Threatened (NT)	CN,IN,MM		Nanorana arnoldi	FALSE	FALSE	FALSE	FALSE	FALSE	FALSE	FALSE	FALSE	FALSE	TRUE	TRUE	Nanorana arnoldi (Dubois, 1975)	1975
Anura	Dicroglossidae	Dicroglossinae	Nanorana	maculosa	Nanorana maculosa			Nanorana maculosa	Paa maculosa, Rana maculosa, Chaparana maculosa	Paa maculosa, Rana maculosa, Chaparana maculosa	Endangered (EN)	CN		Nanorana maculosa	FALSE	FALSE	FALSE	FALSE	FALSE	FALSE	FALSE	FALSE	FALSE	TRUE	TRUE	Nanorana maculosa (Liu, Hu, and Yang, 1960)	1960
Anura	Dicroglossidae	Dicroglossinae	Nanorana	medogensis	Nanorana medogensis			Nanorana medogensis	Paa medogensis, Chaparana medogensis	Paa medogensis, Chaparana medogensis	Data Deficient (DD)	CN		Nanorana medogensis	FALSE	FALSE	FALSE	FALSE	FALSE	FALSE	FALSE	FALSE	FALSE	TRUE	TRUE	Nanorana medogensis (Fei and Ye, 1999)	1999
Anura	Dicroglossidae	Dicroglossinae	Nanorana	quadranus	Nanorana quadranus			Nanorana quadranus	Chaparana quadranus, Rana quadranus, Paa quadrana	Chaparana quadranus, Rana quadranus, Paa quadrana	Near Threatened (NT)	CN		Nanorana quadranus	FALSE	FALSE	FALSE	FALSE	FALSE	FALSE	FALSE	FALSE	FALSE	TRUE	TRUE	Nanorana quadranus (Liu, Hu, and Yang, 1960)	1960
Anura	Dicroglossidae	Dicroglossinae	Nanorana	unculuanus	Nanorana unculuanus			Nanorana unculuanus	Chaparana unculuanus	Chaparana unculuanus	Endangered (EN)	CN		Nanorana unculuanus	FALSE	FALSE	FALSE	FALSE	FALSE	FALSE	FALSE	FALSE	FALSE	TRUE	TRUE	Nanorana unculuanus (Liu, Hu, and Yang, 1960)	1960
Anura	Dicroglossidae	Dicroglossinae	Nanorana	yunnanensis	Nanorana yunnanensis		Yunnan Spiny Frog	Nanorana yunnanensis	Paa bourreti, Paa liui, Paa yunnanensis	Paa bourreti, Paa liui, Paa yunnanensis	Endangered (EN)	VN,MM,CN		Nanorana yunnanensis	FALSE	FALSE	FALSE	FALSE	FALSE	FALSE	FALSE	FALSE	FALSE	TRUE	TRUE	Nanorana yunnanensis (Anderson, 1879)	1879
Anura	Bufonidae		Nectophryne	afra	Nectophryne afra			Nectophryne afra			Least Concern (LC)	CD,GA,GQ,CM,NG		Nectophryne afra	FALSE	FALSE	FALSE	TRUE	FALSE	TRUE	FALSE	FALSE	FALSE	FALSE	TRUE	Nectophryne afra Buchholz and Peters, 1875	1875
Anura	Bufonidae		Nectophryne	batesii	Nectophryne batesii			Nectophryne batesii			Least Concern (LC)	CM,CF,CD,GA		Nectophryne batesii	FALSE	FALSE	FALSE	TRUE	FALSE	TRUE	FALSE	FALSE	FALSE	FALSE	TRUE	Nectophryne batesii Boulenger, 1913	1913
Anura	Bufonidae		Nectophrynoides	asperginis	Nectophrynoides asperginis		Kihansi Spray Toad	Nectophrynoides asperginis			Extinct in the Wild (EW)	TZ		Nectophrynoides asperginis	FALSE	FALSE	FALSE	FALSE	TRUE	TRUE	TRUE	I	FALSE	FALSE	TRUE	Nectophrynoides asperginis Poynton, Howell, Clarke, and Lovett, 1999	1999
Anura	Bufonidae		Nectophrynoides	cryptus	Nectophrynoides cryptus			Nectophrynoides cryptus			Endangered (EN)	TZ		Nectophrynoides cryptus	FALSE	FALSE	FALSE	FALSE	TRUE	TRUE	TRUE	I	FALSE	FALSE	TRUE	Nectophrynoides cryptus Perret, 1971	1971
Anura	Bufonidae		Nectophrynoides	minutus	Nectophrynoides minutus			Nectophrynoides minutus			Endangered (EN)	TZ		Nectophrynoides minutus	FALSE	FALSE	FALSE	TRUE	TRUE	TRUE	TRUE	I	FALSE	FALSE	TRUE	Nectophrynoides minutus Perret, 1972	1972
Anura	Bufonidae		Nectophrynoides	tornieri	Nectophrynoides tornieri		TornierÃ¢â¬â¢s Forest Toad, Kijula	Nectophrynoides tornieri			Least Concern (LC)	TZ		Nectophrynoides tornieri	FALSE	FALSE	FALSE	TRUE	TRUE	TRUE	TRUE	I	FALSE	FALSE	TRUE	Nectophrynoides tornieri (Roux, 1906)	1906
Anura	Bufonidae		Nectophrynoides	viviparus	Nectophrynoides viviparus			Nectophrynoides viviparus			Least Concern (LC)	TZ		Nectophrynoides viviparus	FALSE	FALSE	FALSE	TRUE	TRUE	TRUE	TRUE	I	FALSE	FALSE	TRUE	Nectophrynoides viviparus (Tornier, 1905)	1905
Caudata	Proteidae	Necturinae	Necturus	alabamensis	Necturus alabamensis		Alabama Waterdog, Black Warrior Waterdog	Necturus alabamensis	Necturus lodingi	Necturus lodingi	Endangered (EN)	US		Necturus alabamensis	FALSE	TRUE	TRUE	FALSE	FALSE	TRUE	FALSE	FALSE	FALSE	FALSE	TRUE	Necturus alabamensis Viosca, 1937	1937
Caudata	Proteidae	Necturinae	Necturus	beyeri	Necturus beyeri		Gulf Coast waterdog	Necturus beyeri			Least Concern (LC)	US		Necturus beyeri	TRUE	TRUE	TRUE	TRUE	FALSE	TRUE	FALSE	FALSE	TRUE	FALSE	TRUE	Necturus beyeri Viosca, 1937	1937
Caudata	Proteidae	Necturinae	Necturus	maculosus	Necturus maculosus		Mudpuppy, (Common Mudpuppy)	Necturus maculosus	Necturus maculatus, Siren maculosus	Necturus maculatus, Siren maculosus	Least Concern (LC)	US,CA		Necturus maculosus	TRUE	TRUE	TRUE	TRUE	FALSE	TRUE	FALSE	FALSE	TRUE	FALSE	TRUE	Necturus maculosus (Rafinesque, 1818)	1818
Caudata	Proteidae	Necturinae	Necturus	punctatus	Necturus punctatus		Dwarf waterdog	Necturus punctatus	Menobranchus punctatus	Menobranchus punctatus	Least Concern (LC)	US		Necturus punctatus	FALSE	TRUE	TRUE	FALSE	FALSE	TRUE	FALSE	FALSE	FALSE	FALSE	TRUE	Necturus punctatus (Gibbes, 1850)	1850
Anura	Myobatrachidae	Limnodynastinae	Neobatrachus	sudellae	Neobatrachus sudellae		Painted Burrowing Frog, Common Spadefoot Toad	Neobatrachus sudelli	Neobatrachus centralis, Neobatrachus sudelli		Least Concern (LC)	AU		Neobatrachus sudellae	FALSE	FALSE	FALSE	FALSE	FALSE	FALSE	FALSE	FALSE	TRUE	FALSE	TRUE	Neobatrachus sudelli (Lamb, 1911)	1911
Caudata	Salamandridae	Pleurodelinae	Neurergus	barani	Neurergus barani	Musergus					NA	TR		Neurergus barani	TRUE	FALSE	TRUE	FALSE	FALSE	TRUE	FALSE	FALSE	FALSE	FALSE	TRUE	Neurergus barani Öz, 1994	1994
Caudata	Salamandridae	Pleurodelinae	Neurergus	crocatus	Neurergus crocatus	Neurergus	Lake Urmia Newt, Yellow Spotted Newt, Azerbaijan Newt, Neurergue du Lac Ourmia	Neurergus crocatus			Vulnerable (VU)	IQ,IR,TR		Neurergus crocatus	TRUE	TRUE	TRUE	TRUE	FALSE	TRUE	FALSE	FALSE	TRUE	FALSE	TRUE	Neurergus crocatus Cope, 1862	1862
Caudata	Salamandridae	Pleurodelinae	Neurergus	derjugini	Neurergus derjugini	Neurergus	Kurdistan Newt	Neurergus microspilotus	Neurergus microspilotus		Critically Endangered (CR)	IR,IQ		Neurergus derjugini	TRUE	TRUE	TRUE	TRUE	FALSE	TRUE	FALSE	FALSE	FALSE	TRUE	TRUE	Neurergus derjugini (Nesterov, 1916)	1916
Caudata	Salamandridae	Pleurodelinae	Neurergus	kaiseri	Neurergus kaiseri	Neurergus	Lorestan Newt, Luristan Newt, Emperor Spotted Newt, Zagros Newt, Iranian Harlequin Newt, Kaiser Newt	Neurergus kaiseri			Vulnerable (VU)	IR		Neurergus kaiseri	TRUE	TRUE	TRUE	TRUE	TRUE	TRUE	TRUE	I	TRUE	TRUE	TRUE	Neurergus kaiseri Schmidt, 1952	1952
Caudata	Salamandridae	Pleurodelinae	Neurergus	strauchii	Neurergus strauchii	Musergus		Neurergus strauchii			Vulnerable (VU)	TR		Neurergus strauchii	TRUE	TRUE	TRUE	FALSE	FALSE	TRUE	FALSE	FALSE	TRUE	TRUE	TRUE	Neurergus strauchii (Steindachner, 1887)	1887
Anura	Ranidae		Nidirana	chapaensis	Nidirana chapaensis			Babina chapaensis	Babina chapaensis, Amolops chapaensis, Huia chapaensis	Amolops chapaensis, Huia chapaensis	Least Concern (LC)	LA,VN		Nidirana chapaensis	FALSE	FALSE	FALSE	FALSE	FALSE	FALSE	FALSE	FALSE	FALSE	TRUE	TRUE	Nidirana chapaensis (Bourret, 1937)	1937
Anura	Ranidae		Nidirana	lini	Nidirana lini			Babina lini	Babina lini, Rana lini	Rana lini, Nidirana lini	Data Deficient (DD)	CN,LA,TH,VN		Nidirana lini	FALSE	FALSE	FALSE	FALSE	FALSE	FALSE	FALSE	FALSE	FALSE	TRUE	TRUE	Nidirana lini (Chou, 1999)	1999
Anura	Ranidae		Nidirana	pleuraden	Nidirana pleuraden			Babina pleuraden	Babina pleuraden, Rana pleuraden	Rana pleuraden	Least Concern (LC)	CN		Nidirana pleuraden	FALSE	FALSE	FALSE	FALSE	FALSE	FALSE	FALSE	FALSE	FALSE	TRUE	TRUE	Nidirana pleuraden (Boulenger, 1904)	1904
Anura	Bufonidae		Nimbaphrynoides	occidentalis	Nimbaphrynoides occidentalis		Western Nimba Toad	Nimbaphrynoides occidentalis	Nimbaphrynoides liberiensis, Nectophrynoides occidentalis	Nectophrynoides occidentalis	Critically Endangered (CR)	GN,CI,LR		Nimbaphrynoides occidentalis	FALSE	FALSE	FALSE	FALSE	TRUE	TRUE	TRUE	I	TRUE	FALSE	TRUE	Nimbaphrynoides occidentalis (Angel, 1943)	1943
Caudata	Salamandridae	Pleurodelinae	Notophthalmus	perstriatus	Notophthalmus perstriatus	Notophthalmus	Striped Newt	Notophthalmus perstriatus	Neurergus perstriatus, Triturus perstriatus, Diemictylus viridescens perstriatus	Triturus perstriatus, Diemictylus viridescens perstriatus	Near Threatened (NT)	US		Notophthalmus perstriatus	FALSE	FALSE	FALSE	FALSE	FALSE	FALSE	FALSE	FALSE	FALSE	TRUE	TRUE	Notophthalmus perstriatus (Bishop, 1941)	1941
Caudata	Salamandridae	Pleurodelinae	Notophthalmus	viridescens	Notophthalmus viridescens	Notophthalmus	Eastern Newt, Broken-Striped Newt, Central Newt, Peninsula Newt, Red Spotted Newt	Notophthalmus viridescens	Neurergus viridescens, Triturus viridescens, Diemictylus viridescens	Triturus viridescens, Diemictylus viridescens	Least Concern (LC)	US,CA		Notophthalmus viridescens	TRUE	TRUE	TRUE	TRUE	FALSE	TRUE	FALSE	FALSE	TRUE	FALSE	TRUE	Notophthalmus viridescens (Rafinesque, 1820)	1820
Anura	Hylidae	Pelodryadinae	Nyctimystes	disruptus	Nyctimystes disruptus			Nyctimystes disruptus	Nyctimystes oktediensis, Nyctimystes disrupta, Litoria disrupta	Nyctimystes disrupta, Litoria disrupta	Least Concern (LC)	PG		Nyctimystes disruptus	FALSE	FALSE	FALSE	FALSE	FALSE	FALSE	FALSE	FALSE	FALSE	TRUE	TRUE	Nyctimystes disruptus Tyler, 1963	1963
Anura	Hylidae	Pelodryadinae	Nyctimystes	trachydermis	Nyctimystes trachydermis			Nyctimystes trachydermis	Litoria trachydermis	Litoria trachydermis	Least Concern (LC)	PG		Nyctimystes trachydermis	FALSE	FALSE	FALSE	FALSE	FALSE	FALSE	FALSE	FALSE	FALSE	TRUE	TRUE	Nyctimystes trachydermis Zweifel, 1983	1983
Anura	Rhacophoridae	Rhacophorinae	Nyctixalus	pictus	Nyctixalus pictus		Peter's Tree Frog	Nyctixalus pictus	Theloderma pictum, Nyctixalus pictum		Near Threatened (NT)	ID,MY,PH,SG,TH,VN		Nyctixalus pictus	TRUE	TRUE	TRUE	TRUE	FALSE	TRUE	FALSE	FALSE	TRUE	FALSE	TRUE	Nyctixalus pictus (Peters, 1871)	1871
Anura	Dicroglossidae	Occidozyginae	Occidozyga	laevis	Occidozyga laevis		Puddle Frog, Yellow-Bellied Puddle Frog	Occidozyga laevis			Least Concern (LC)	TH,PH,MY,ID		Occidozyga laevis	FALSE	TRUE	TRUE	FALSE	FALSE	TRUE	FALSE	FALSE	FALSE	FALSE	TRUE	Occidozyga laevis (Günther, 1858)	1858
Anura	Dicroglossidae	Occidozyginae	Occidozyga	lima	Occidozyga lima		Gray-green Puddlefrog	Occidozyga lima			Least Concern (LC)	KH,CN,HK,IN,ID,LA,MY,MM,TH,VN		Occidozyga lima	TRUE	TRUE	TRUE	TRUE	FALSE	TRUE	FALSE	FALSE	TRUE	TRUE	TRUE	Occidozyga lima (Gravenhorst, 1829)	1829
Anura	Dicroglossidae	Occidozyginae	Occidozyga	martensii	Occidozyga martensii		Malayan Puddlefrog	Occidozyga martensii			Least Concern (LC)	KH,CN,LA,MM,TH,VN		Occidozyga martensii	FALSE	FALSE	FALSE	FALSE	FALSE	FALSE	FALSE	FALSE	FALSE	TRUE	TRUE	Occidozyga martensii (Peters, 1867)	1867
Anura	Odontophrynidae		Odontophrynus	americanus	Odontophrynus americanus		American Ground Frog, Common Lesser Escuerzo	Odontophrynus americanus			Least Concern (LC)	AR,BR,PY,UY		Odontophrynus americanus	TRUE	FALSE	TRUE	FALSE	FALSE	TRUE	FALSE	FALSE	TRUE	TRUE	TRUE	Odontophrynus americanus (Duméril and Bibron, 1841)	1841
Anura	Ranidae		Odorrana	absita	Odorrana absita			Odorrana absita	Huia absita	Huia absita	Least Concern (LC)	LA,VN		Odorrana absita	FALSE	FALSE	FALSE	FALSE	FALSE	FALSE	FALSE	FALSE	FALSE	TRUE	TRUE	Odorrana absita (Stuart and Chan-ard, 2005)	2005
Anura	Ranidae		Odorrana	andersonii	Odorrana andersonii			Odorrana andersonii	Rana andersonii	Rana andersonii	Least Concern (LC)	CN,IN,LA,MM,TH,VN		Odorrana andersonii	FALSE	FALSE	FALSE	FALSE	FALSE	FALSE	FALSE	FALSE	FALSE	TRUE	TRUE	Odorrana andersonii (Boulenger, 1882)	1882
Anura	Ranidae		Odorrana	bacboensis	Odorrana bacboensis		black egg	Odorrana bacboensis	Rana bacboensis, Huia bacboensis	Rana bacboensis, Huia bacboensis	Least Concern (LC)	CN,VN		Odorrana bacboensis	FALSE	FALSE	FALSE	FALSE	FALSE	FALSE	FALSE	FALSE	FALSE	TRUE	TRUE	Odorrana bacboensis (Bain, Lathrop, Murphy, Orlov, and Ho, 2003)	2003
Anura	Ranidae		Odorrana	banaorum	Odorrana banaorum		Southern Big Eye	Odorrana banaorum	Rana banaorum, Huia banaorum	Rana banaorum, Huia banaorum	Least Concern (LC)	VN		Odorrana banaorum	FALSE	FALSE	FALSE	FALSE	FALSE	FALSE	FALSE	FALSE	FALSE	TRUE	TRUE	Odorrana banaorum (Bain, Lathrop, Murphy, Orlov, and Ho, 2003)	2003
Anura	Ranidae		Odorrana	chloronota	Odorrana chloronota			Odorrana chloronota	Rana chloronota	Rana chloronota	Least Concern (LC)	CN,HK,IN,LA,MM,TH,VN		Odorrana chloronota	FALSE	FALSE	FALSE	TRUE	FALSE	TRUE	FALSE	FALSE	FALSE	TRUE	TRUE	Odorrana chloronota (Günther, 1876)	1876
Anura	Ranidae		Odorrana	grahami	Odorrana grahami			Odorrana grahami	Rana grahami	Rana grahami	Near Threatened (NT)	CN,VN		Odorrana grahami	FALSE	FALSE	FALSE	FALSE	FALSE	FALSE	FALSE	FALSE	FALSE	TRUE	TRUE	Odorrana grahami (Boulenger, 1917)	1917
Anura	Ranidae		Odorrana	hejiangensis	Odorrana hejiangensis			Odorrana hejiangensis	Rana hejiangensis	Rana hejiangensis	Data Deficient (DD)	CN		Odorrana hejiangensis	FALSE	FALSE	FALSE	FALSE	FALSE	FALSE	FALSE	FALSE	FALSE	TRUE	TRUE	Odorrana hejiangensis (Deng and Yu, 1992)	1992
Anura	Ranidae		Odorrana	hosii	Odorrana hosii		Green Odorfrog	Odorrana hosii	Rana hosii, Huia hosii	Rana hosii, Huia hosii	Least Concern (LC)	ID,MY,MM,TH		Odorrana hosii	FALSE	TRUE	TRUE	FALSE	FALSE	TRUE	FALSE	FALSE	TRUE	FALSE	TRUE	Odorrana hosii (Boulenger, 1891)	1891
Anura	Ranidae		Odorrana	indeprensa	Odorrana indeprensa			Odorrana indeprensa			Vulnerable (VU)	TH		Odorrana indeprensa	FALSE	FALSE	FALSE	FALSE	FALSE	FALSE	FALSE	FALSE	FALSE	TRUE	TRUE	Odorrana indeprensa (Bain and Stuart, 2006)	2006
Anura	Ranidae		Odorrana	ishikawae	Odorrana ishikawae		Ishikawa's frog	Odorrana ishikawae	Rana ishikawae	Rana ishikawae	Endangered (EN)	JP		Odorrana ishikawae	FALSE	FALSE	FALSE	FALSE	FALSE	FALSE	FALSE	FALSE	FALSE	TRUE	TRUE	Odorrana ishikawae (Stejneger, 1901)	1901
Anura	Ranidae		Odorrana	jingdongensis	Odorrana jingdongensis		Odor frog	Odorrana jingdongensis	Rana hmongorum, Rana jingdongensis	Rana hmongorum, Rana jingdongensis	Vulnerable (VU)	CN		Odorrana jingdongensis	FALSE	FALSE	FALSE	FALSE	FALSE	FALSE	FALSE	FALSE	FALSE	TRUE	TRUE	Odorrana jingdongensis Fei, Ye, and Li, 2001	2001
Anura	Ranidae		Odorrana	kuangwuensis	Odorrana kuangwuensis			Odorrana kuangwuensis	Rana kuangwuensis	Rana kuangwuensis	Endangered (EN)	CN		Odorrana kuangwuensis	FALSE	FALSE	FALSE	FALSE	FALSE	FALSE	FALSE	FALSE	FALSE	TRUE	TRUE	Odorrana kuangwuensis (Liu and Hu, 1966)	1966
Anura	Ranidae		Odorrana	kweichowensis	Odorrana kweichowensis		Guizhou Odorous Frog				NA	CN		Odorrana kweichowensis	FALSE	FALSE	FALSE	FALSE	FALSE	FALSE	FALSE	FALSE	FALSE	TRUE	TRUE	Odorrana kweichowensis Li, Xu, Lv, Jiang, Wei, and Wang, 2018	2018
Anura	Ranidae		Odorrana	livida	Odorrana livida		Tenasserim Odorfrog	Odorrana livida	Rana livida	Rana livida	Data Deficient (DD)	MM		Odorrana livida	TRUE	TRUE	TRUE	TRUE	FALSE	TRUE	FALSE	FALSE	TRUE	FALSE	TRUE	Odorrana livida (Blyth, 1856)	1856
Anura	Ranidae		Odorrana	macrotympana	Odorrana macrotympana						NA	CN		Odorrana macrotympana	FALSE	FALSE	FALSE	FALSE	FALSE	FALSE	FALSE	FALSE	FALSE	TRUE	TRUE	Odorrana macrotympana (Yang, 2008)	2008
Anura	Ranidae		Odorrana	morafkai	Odorrana morafkai		mottled	Odorrana morafkai	Rana morafkai, Huia morafkai	Rana morafkai, Huia morafkai	Least Concern (LC)	VN		Odorrana morafkai	FALSE	FALSE	FALSE	FALSE	FALSE	FALSE	FALSE	FALSE	FALSE	TRUE	TRUE	Odorrana morafkai (Bain, Lathrop, Murphy, Orlov, and Ho, 2003)	2003
Anura	Ranidae		Odorrana	nanjiangensis	Odorrana nanjiangensis						NA	CN		Odorrana nanjiangensis	FALSE	FALSE	FALSE	FALSE	FALSE	FALSE	FALSE	FALSE	FALSE	TRUE	TRUE	Odorrana nanjiangensis Fei, Ye, Xie, and Jiang, 2007	2007
Anura	Ranidae		Odorrana	schmackeri	Odorrana schmackeri		Piebald odorous frog	Odorrana schmackeri	Rana schmackeri	Rana schmackeri	Least Concern (LC)	CN		Odorrana schmackeri	FALSE	FALSE	FALSE	FALSE	FALSE	FALSE	FALSE	FALSE	FALSE	TRUE	TRUE	Odorrana schmackeri (Boettger, 1892)	1892
Anura	Ranidae		Odorrana	splendida	Odorrana splendida		Amami-Ishikawa_Gaeru	Odorrana splendida			Endangered (EN)	JP		Odorrana splendida	FALSE	FALSE	FALSE	FALSE	FALSE	FALSE	FALSE	FALSE	FALSE	TRUE	TRUE	Odorrana splendida Kuramoto, Satou, Oumi, Kurabayashi, and Sumida, 2011	2011
Anura	Ranidae		Odorrana	swinhoana	Odorrana swinhoana			Odorrana swinhoana	Amolops taiwanianus, Rana swinhoana	Amolops taiwanianus, Rana swinhoana	Least Concern (LC)	TW		Odorrana swinhoana	FALSE	FALSE	FALSE	FALSE	FALSE	FALSE	FALSE	FALSE	FALSE	TRUE	TRUE	Odorrana swinhoana (Boulenger, 1903)	1903
Anura	Ranidae		Odorrana	tiannanensis	Odorrana tiannanensis			Odorrana tiannanensis	Rana megatympanum, Rana tiannanensis, Rana tabaca	Rana megatympanum, Rana tiannanensis, Rana tabaca	Least Concern (LC)	CN		Odorrana tiannanensis	FALSE	FALSE	FALSE	FALSE	FALSE	FALSE	FALSE	FALSE	FALSE	TRUE	TRUE	Odorrana tiannanensis (Yang and Li, 1980)	1980
Anura	Ranidae		Odorrana	wuchuanensis	Odorrana wuchuanensis			Odorrana wuchuanensis	Rana wuchuanensis	Rana wuchuanensis	Critically Endangered (CR)	CN		Odorrana wuchuanensis	FALSE	FALSE	FALSE	FALSE	FALSE	FALSE	FALSE	FALSE	FALSE	TRUE	TRUE	Odorrana wuchuanensis (Xu, 1983)	1983
Caudata	Plethodontidae	Hemidactyliinae	Oedipina	taylori	Oedipina taylori	Oedipina		Oedipina taylori			Least Concern (LC)	GT,HN		Oedipina taylori	FALSE	FALSE	FALSE	TRUE	FALSE	TRUE	FALSE	FALSE	FALSE	FALSE	TRUE	Oedipina taylori Stuart, 1952	1952
Caudata	Salamandridae	Pleurodelinae	Ommatotriton	nesterovi	Ommatotriton nesterovi						NA	TR		Ommatotriton nesterovi	TRUE	FALSE	TRUE	FALSE	FALSE	TRUE	FALSE	FALSE	FALSE	FALSE	TRUE	Ommatotriton nesterovi (Litvinchuk, Zuiderwijk, Borkin, and Rosanov, 2005)	2005
Caudata	Salamandridae	Pleurodelinae	Ommatotriton	ophryticus	Ommatotriton ophryticus		Northern Banded Newt	Ommatotriton ophryticus			Near Threatened (NT)	AM,GE,RU,TR		Ommatotriton ophryticus	TRUE	TRUE	TRUE	FALSE	FALSE	TRUE	FALSE	FALSE	TRUE	TRUE	TRUE	Ommatotriton ophryticus (Berthold, 1846)	1846
Caudata	Salamandridae	Pleurodelinae	Ommatotriton	vittatus	Ommatotriton vittatus		Southern Banded Newt	Ommatotriton vittatus	Triturus vittatus	Triturus vittatus	Least Concern (LC)	IQ,IL,JO,LB,SY,TR		Ommatotriton vittatus	FALSE	TRUE	TRUE	TRUE	FALSE	TRUE	FALSE	FALSE	TRUE	TRUE	TRUE	Ommatotriton vittatus (Gray, 1835)	1835
Caudata	Hynobiidae	Onychodactylinae	Onychodactylus	japonicus	Onychodactylus japonicus	Onychodactylus	Japanese Clawed Salamander	Onychodactylus japonicus			Least Concern (LC)	JP		Onychodactylus japonicus	FALSE	FALSE	FALSE	TRUE	FALSE	TRUE	FALSE	FALSE	TRUE	FALSE	TRUE	Onychodactylus japonicus (Houttuyn, 1782)	1782
Anura	Dendrobatidae	Dendrobatinae	Oophaga	arborea	Oophaga arborea		Polkadot Poison Frog	Oophaga arborea	Dendrobates arboreus	Dendrobates arboreus	Endangered (EN)	PA		Oophaga arborea	FALSE	FALSE	FALSE	TRUE	TRUE	TRUE	TRUE	II	FALSE	FALSE	TRUE	Oophaga arborea (Myers, Daly, and Martínez, 1984)	1984
Anura	Dendrobatidae	Dendrobatinae	Oophaga	granulifera	Oophaga granulifera		Granular Poison Frog	Oophaga granulifera	Dendrobates granuliferus	Dendrobates granuliferus	Vulnerable (VU)	CR,PA		Oophaga granulifera	TRUE	TRUE	TRUE	FALSE	TRUE	TRUE	TRUE	II	TRUE	TRUE	TRUE	Oophaga granulifera (Taylor, 1958)	1958
Anura	Dendrobatidae	Dendrobatinae	Oophaga	histrionica	Oophaga histrionica		Harlequin Poison Frog	Oophaga histrionica	Dendrobates histrionicus	Dendrobates histrionicus	Least Concern (LC)	EC,CO		Oophaga histrionica	TRUE	TRUE	TRUE	TRUE	TRUE	TRUE	TRUE	II	TRUE	TRUE	TRUE	Oophaga histrionica (Berthold, 1845)	1845
Anura	Dendrobatidae	Dendrobatinae	Oophaga	lehmanni	Oophaga lehmanni		Lehmann's Frog, Red-banded Poison Frog, Harlequin Poison Frog	Oophaga lehmanni	Dendrobates lehmanni	Dendrobates lehmanni	Critically Endangered (CR)	CO		Oophaga lehmanni	TRUE	TRUE	TRUE	TRUE	TRUE	TRUE	TRUE	II	TRUE	TRUE	TRUE	Oophaga lehmanni (Myers and Daly, 1976)	1976
Anura	Dendrobatidae	Dendrobatinae	Oophaga	pumilio	Oophaga pumilio		Strawberry Poison Frog	Oophaga pumilio	Dendrobates pumilio	Dendrobates pumilio	Least Concern (LC)	PA,NI,CR		Oophaga pumilio	TRUE	TRUE	TRUE	TRUE	TRUE	TRUE	TRUE	II	TRUE	TRUE	TRUE	Oophaga pumilio (Schmidt, 1857)	1857
Anura	Dendrobatidae	Dendrobatinae	Oophaga	speciosa	Oophaga speciosa		Splendid Poison Frog	Oophaga speciosa	Dendrobates speciosus	Dendrobates speciosus	Endangered (EN)	PA		Oophaga speciosa	FALSE	FALSE	FALSE	FALSE	TRUE	TRUE	TRUE	II	FALSE	TRUE	TRUE	Oophaga speciosa (Schmidt, 1857)	1857
Anura	Dendrobatidae	Dendrobatinae	Oophaga	sylvatica	Oophaga sylvatica			Oophaga sylvatica			Near Threatened (NT)	CO,EC		Oophaga sylvatica	TRUE	TRUE	TRUE	FALSE	TRUE	TRUE	TRUE	II	TRUE	TRUE	TRUE	Oophaga sylvatica (Funkhouser, 1956)	1956
Anura	Dendrobatidae	Dendrobatinae	Oophaga	vicentei	Oophaga vicentei			Oophaga vicentei	Dendrobates vicentei	Dendrobates vicentei	Data Deficient (DD)	PA		Oophaga vicentei	FALSE	TRUE	TRUE	TRUE	TRUE	TRUE	TRUE	II	TRUE	TRUE	TRUE	Oophaga vicentei (Jungfer, Weygoldt, and Juraske, 1996)	1996
Anura	Megophryidae	Megophryinae	Ophryophryne	microstoma	Ophryophryne microstoma			Ophryophryne microstoma	Megophrys microstoma		Least Concern (LC)	CN,TH,VN		Ophryophryne microstoma	FALSE	FALSE	FALSE	TRUE	FALSE	TRUE	FALSE	FALSE	FALSE	FALSE	TRUE	Megophrys microstoma (Boulenger, 1903)	1903
Anura	Strabomantidae	Pristimantinae	Oreobates	quixensis	Oreobates quixensis			Oreobates quixensis	Eleutherodactylus verrucosus, Leptodactylus tuberculosus, Eupsophus quixensis	Eleutherodactylus verrucosus, Leptodactylus tuberculosus, Eupsophus quixensis	Least Concern (LC)	BO,BR,CO,EC,PE		Oreobates quixensis	TRUE	FALSE	TRUE	FALSE	FALSE	TRUE	FALSE	FALSE	FALSE	FALSE	TRUE	Oreobates quixensis Jiménez de la Espada, 1872	1872
Anura	Megophryidae	Leptobrachiinae	Oreolalax	jingdongensis	Oreolalax jingdongensis		Jingdong Toothed Toad	Oreolalax jingdongensis			Vulnerable (VU)	CN		Oreolalax jingdongensis	FALSE	FALSE	FALSE	FALSE	FALSE	FALSE	FALSE	FALSE	FALSE	TRUE	TRUE	Oreolalax jingdongensis Ma, Yang, and Li, 1983	1983
Anura	Megophryidae	Leptobrachiinae	Oreolalax	major	Oreolalax major		Large Toothed Toad	Oreolalax major			Vulnerable (VU)	CN		Oreolalax major	FALSE	FALSE	FALSE	FALSE	FALSE	FALSE	FALSE	FALSE	FALSE	TRUE	TRUE	Oreolalax major (Liu and Hu, 1960)	1960
Anura	Megophryidae	Leptobrachiinae	Oreolalax	multipunctatus	Oreolalax multipunctatus		Spotted Toothed Toad	Oreolalax multipunctatus			Vulnerable (VU)	CN		Oreolalax multipunctatus	FALSE	FALSE	FALSE	FALSE	FALSE	FALSE	FALSE	FALSE	FALSE	TRUE	TRUE	Oreolalax multipunctatus Wu, Zhao, Inger, and Shaffer, 1993	1993
Anura	Megophryidae	Leptobrachiinae	Oreolalax	omeimontis	Oreolalax omeimontis		Omei Toothed Toad	Oreolalax omeimontis			Endangered (EN)	CN		Oreolalax omeimontis	FALSE	FALSE	FALSE	FALSE	FALSE	FALSE	FALSE	FALSE	FALSE	TRUE	TRUE	Oreolalax omeimontis (Liu and Hu, 1960)	1960
Anura	Megophryidae	Leptobrachiinae	Oreolalax	popei	Oreolalax popei		Baoxing Toothed Toad	Oreolalax popei			Least Concern (LC)	CN		Oreolalax popei	FALSE	FALSE	FALSE	FALSE	FALSE	FALSE	FALSE	FALSE	FALSE	TRUE	TRUE	Oreolalax popei (Liu, 1947)	1947
Anura	Megophryidae	Leptobrachiinae	Oreolalax	rhodostigmatus	Oreolalax rhodostigmatus		Red-spotted Toothed Toad	Oreolalax rhodostigmatus			Vulnerable (VU)	CN		Oreolalax rhodostigmatus	FALSE	FALSE	FALSE	FALSE	FALSE	FALSE	FALSE	FALSE	FALSE	TRUE	TRUE	Oreolalax rhodostigmatus Hu and Fei, 1979	1979
Anura	Microhylidae	Asterophryinae	Oreophryne	brevicrus	Oreophryne brevicrus			Oreophryne brevicrus			Data Deficient (DD)	PG		Oreophryne brevicrus	FALSE	FALSE	FALSE	TRUE	FALSE	TRUE	FALSE	FALSE	FALSE	FALSE	TRUE	Oreophryne brevicrus Zweifel, 1956	1956
Anura	Hylidae	Hylinae	Osteocephalus	leprieurii	Osteocephalus leprieurii			Osteocephalus leprieurii			Least Concern (LC)	BO,BR,CO,GF,GY,PE,SR,VE		Osteocephalus leprieurii	FALSE	FALSE	FALSE	TRUE	FALSE	TRUE	FALSE	FALSE	FALSE	FALSE	TRUE	Osteocephalus leprieurii (Duméril and Bibron, 1841)	1841
Anura	Hylidae	Hylinae	Osteocephalus	taurinus	Osteocephalus taurinus			Osteocephalus taurinus			Least Concern (LC)	BO,BR,CO,EC,GF,GY,PE,SR,VE		Osteocephalus taurinus	FALSE	TRUE	TRUE	TRUE	FALSE	TRUE	FALSE	FALSE	TRUE	FALSE	TRUE	Osteocephalus taurinus Steindachner, 1862	1862
Anura	Hylidae	Hylinae	Osteopilus	septentrionalis	Osteopilus septentrionalis		Cuban Treefrog	Osteopilus septentrionalis			Least Concern (LC)	AI,BS,KY,CR,CU,GP,PR,TC,US,VG,VI		Osteopilus septentrionalis	TRUE	TRUE	TRUE	FALSE	FALSE	TRUE	FALSE	FALSE	TRUE	TRUE	TRUE	Osteopilus septentrionalis (Duméril and Bibron, 1841)	1841
Anura	Hylidae	Hylinae	Osteopilus	vastus	Osteopilus vastus		Hispaniolan Giant Treefrog	Osteopilus vastus			Vulnerable (VU)	HT,DO		Osteopilus vastus	FALSE	FALSE	FALSE	FALSE	FALSE	FALSE	FALSE	FALSE	TRUE	TRUE	TRUE	Osteopilus vastus (Cope, 1871)	1871
Caudata	Hynobiidae	Hynobiinae	Pachyhynobius	shangchengensis	Pachyhynobius shangchengensis		Shangcheng Stout Salamander	Pachyhynobius shangchengensis	Hynobius yunanicus, Xenobius melanonychus, Sinobius melanonychus	Hynobius yunanicus, Xenobius melanonychus, Sinobius melanonychus	Vulnerable (VU)	CN		Pachyhynobius shangchengensis	FALSE	TRUE	TRUE	TRUE	FALSE	TRUE	FALSE	FALSE	TRUE	TRUE	TRUE	Pachyhynobius shangchengensis Fei, Qu, and Wu, 1983	1983
Caudata	Salamandridae	Pleurodelinae	Pachytriton	brevipes	Pachytriton brevipes		Paddle-Tailed Newt, Black-spotted Stout Newt; Pachytriton tachete	Pachytriton brevipes			Least Concern (LC)	CN	The genera Pachytriton and Paramesotriton have had a confused taxonomic history, complicated by the fact that a number of these salamanders have long been in the pet trade, identified as Paddletailed and Warty Newts, respectively. In 1985 Frost (Amph	Pachytriton brevipes	TRUE	TRUE	TRUE	TRUE	FALSE	TRUE	FALSE	FALSE	TRUE	TRUE	TRUE	Pachytriton brevipes (Sauvage, 1876)	1876
Caudata	Salamandridae	Pleurodelinae	Pachytriton	inexpectatus	Pachytriton inexpectatus		Yaoshan Stout Newt; Pachytriton de Guangxi				NA	CN		Pachytriton inexpectatus	FALSE	FALSE	FALSE	FALSE	FALSE	FALSE	FALSE	FALSE	FALSE	TRUE	TRUE	Pachytriton inexpectatus Nishikawa, Jiang, Matsui, and Mo, 2011	2011
Caudata	Salamandridae	Pleurodelinae	Pachytriton	wuguanfui	Pachytriton wuguanfui						NA	CN		Pachytriton wuguanfui	FALSE	FALSE	FALSE	FALSE	FALSE	FALSE	FALSE	FALSE	FALSE	TRUE	TRUE	Pachytriton wuguanfui Yuan, Zhang, and Che, 2016	2016
Anura	Microhylidae	Asterophryinae	Paedophryne	swiftorum	Paedophryne swiftorum						NA	PG		Paedophryne swiftorum	FALSE	FALSE	FALSE	TRUE	FALSE	TRUE	FALSE	FALSE	FALSE	FALSE	TRUE	Paedophryne swiftorum Rittmeyer, Allison, Gründler, Thompson, and Austin, 2012	2012
Anura	Megophryidae	Megophryinae	Panophrys	caudoprocta	Panophrys caudoprocta			Megophrys caudoprocta	Megophrys caudoprocta		Data Deficient (DD)	CN		Panophrys caudoprocta	FALSE	FALSE	FALSE	FALSE	FALSE	FALSE	FALSE	FALSE	FALSE	TRUE	TRUE	Megophrys caudoprocta Shen, 1994	1994
Anura	Ranidae		Papurana	arfaki	Papurana arfaki			Papurana arfaki	Rana arfaki	Rana arfaki	Least Concern (LC)	PG,ID		Papurana arfaki	FALSE	FALSE	FALSE	TRUE	FALSE	TRUE	FALSE	FALSE	FALSE	TRUE	TRUE	Papurana arfaki (Meyer, 1875)	1875
Anura	Ranidae		Papurana	daemeli	Papurana daemeli		Wood Frog	Papurana daemeli	Rana daemeli	Rana daemeli	Least Concern (LC)	PG,ID,AU		Papurana daemeli	FALSE	FALSE	FALSE	FALSE	FALSE	FALSE	FALSE	FALSE	FALSE	TRUE	TRUE	Papurana daemeli (Steindachner, 1868)	1868
Anura	Ranidae		Papurana	garritor	Papurana garritor			Papurana garritor	Rana garritor	Rana garritor	Least Concern (LC)	PG		Papurana garritor	FALSE	FALSE	FALSE	TRUE	FALSE	TRUE	FALSE	FALSE	FALSE	TRUE	TRUE	Papurana garritor (Menzies, 1987)	1987
Anura	Ranidae		Papurana	jimiensis	Papurana jimiensis			Papurana jimiensis	Rana jimiensis	Rana jimiensis	Least Concern (LC)	PG		Papurana jimiensis	FALSE	FALSE	FALSE	FALSE	FALSE	FALSE	FALSE	FALSE	FALSE	TRUE	TRUE	Papurana jimiensis (Tyler, 1963)	1963
Anura	Myobatrachidae	Myobatrachinae	Paracrinia	haswelli	Paracrinia haswelli		Haswell's Froglet	Paracrinia haswelli			Least Concern (LC)	AU		Paracrinia haswelli	FALSE	FALSE	FALSE	FALSE	FALSE	FALSE	FALSE	FALSE	TRUE	FALSE	TRUE	Paracrinia haswelli (Fletcher, 1894)	1894
Caudata	Salamandridae	Pleurodelinae	Paramesotriton	caudopunctatus	Paramesotriton caudopunctatus	Allomesotriton	Spot-tailed Warty Newt	Paramesotriton caudopunctatus			Near Threatened (NT)	CN		Paramesotriton caudopunctatus	FALSE	TRUE	TRUE	TRUE	FALSE	TRUE	TRUE	II	FALSE	TRUE	TRUE	Paramesotriton caudopunctatus (Liu and Hu, 1973)	1973
Caudata	Salamandridae	Pleurodelinae	Paramesotriton	chinensis	Paramesotriton chinensis	Paramesotriton	Chinese Warty Newt, Hong Kong Warty Newt	Paramesotriton chinensis			Least Concern (LC)	CN		Paramesotriton chinensis	TRUE	TRUE	TRUE	TRUE	TRUE	TRUE	TRUE	II	TRUE	TRUE	TRUE	Paramesotriton chinensis (Gray, 1859)	1859
Caudata	Salamandridae	Pleurodelinae	Paramesotriton	deloustali	Paramesotriton deloustali	Paramesotriton	Tam Dao Warty Newt; Paramesotriton de Tam Dao	Paramesotriton deloustali			Least Concern (LC)	VN		Paramesotriton deloustali	FALSE	TRUE	TRUE	TRUE	FALSE	TRUE	TRUE	II	TRUE	TRUE	TRUE	Paramesotriton deloustali (Bourret, 1934)	1934
Caudata	Salamandridae	Pleurodelinae	Paramesotriton	fuzhongensis	Paramesotriton fuzhongensis	Paramesotriton	Fuzhong Warty Newt; Paramesotriton de Fuzhong	Paramesotriton fuzhongensis			Vulnerable (VU)	CN		Paramesotriton fuzhongensis	FALSE	FALSE	FALSE	FALSE	FALSE	FALSE	TRUE	II	FALSE	TRUE	TRUE	Paramesotriton fuzhongensis Wen, 1989	1989
Caudata	Salamandridae	Pleurodelinae	Paramesotriton	hongkongensis	Paramesotriton hongkongensis	Paramesotriton	Hong Kong Warty Newt; Paramesotriton de Hong Kong	Paramesotriton hongkongensis			Near Threatened (NT)	CN,HK		Paramesotriton hongkongensis	TRUE	TRUE	TRUE	TRUE	TRUE	TRUE	TRUE	II	TRUE	TRUE	TRUE	Paramesotriton hongkongensis (Myers and Leviton, 1962)	1962
Caudata	Salamandridae	Pleurodelinae	Paramesotriton	labiatus	Paramesotriton labiatus	Paramesotriton	Zhao Ermi's Smooth Warty Newt, Spotless Smooth Warty Newt; Paramesotriton de Zhao Ermi, Paddletail newt	Pachytriton labiatus	Pachytriton labiatus		Least Concern (LC)	CN	The genera Pachytriton and Paramesotriton have had a confused taxonomic history, complicated by the fact that a number of these salamanders have long been in the pet trade, identified as Paddletailed and Warty Newts, respectively. In 1985 Frost (Amphibia	Paramesotriton labiatus	TRUE	TRUE	TRUE	TRUE	TRUE	TRUE	TRUE	II	TRUE	FALSE	TRUE	Paramesotriton labiatus (Unterstein, 1930)	1930
Caudata	Salamandridae	Pleurodelinae	Paramesotriton	longliensis	Paramesotriton longliensis	Allomesotriton	Longli Warty Newt; Paramesotriton de Longi				NA	CN		Paramesotriton longliensis	FALSE	FALSE	FALSE	FALSE	FALSE	FALSE	TRUE	II	FALSE	TRUE	TRUE	Paramesotriton longliensis Li, Tian, Gu, and Xiong, 2008	2008
Caudata	Salamandridae	Pleurodelinae	Paramesotriton	zhijinensis	Paramesotriton zhijinensis	Allomesotriton					NA	CN		Paramesotriton zhijinensis	FALSE	FALSE	FALSE	FALSE	FALSE	FALSE	TRUE	II	FALSE	TRUE	TRUE	Paramesotriton zhijinensis Li, Tian, and Gu, 2008	2008
Anura	Pelobatidae		Pelobates	cultripes	Pelobates cultripes		Western Spadefoot	Pelobates cultripes			Near Threatened (NT)	ES,PT,FR		Pelobates cultripes	FALSE	TRUE	TRUE	FALSE	FALSE	TRUE	FALSE	FALSE	FALSE	FALSE	TRUE	Pelobates cultripes (Cuvier, 1829)	1829
Anura	Pelobatidae		Pelobates	fuscus	Pelobates fuscus		Common Spadefoot	Pelobates fuscus	Bufo fuscus	Bufo fuscus	Least Concern (LC)	AT,BY,BE,BA,BG,HR,CZ,DK,EE,FR,DE,GR,HU,IT,LV,LT,MD,NL,PL,RO,RU,RS,SK,SI,SE,TR,UA		Pelobates fuscus	TRUE	TRUE	TRUE	TRUE	FALSE	TRUE	FALSE	FALSE	FALSE	TRUE	TRUE	Pelobates fuscus (Laurenti, 1768)	1768
Anura	Megophryidae	Megophryinae	Pelobatrachus	nasuta	Pelobatrachus nasuta		Long-nosed Horned Frog, Malayan Horned Frog	Megophrys nasuta	Megophrys nasuta		Least Concern (LC)	ID,MY,SG		Pelobatrachus nasuta	TRUE	TRUE	TRUE	TRUE	FALSE	TRUE	FALSE	FALSE	TRUE	TRUE	TRUE	Megophrys nasuta (Schlegel, 1858)	1858
Anura	Megophryidae	Megophryinae	Pelobatrachus	stejnegeri	Pelobatrachus stejnegeri			Megophrys stejnegeri	Megophrys stejnegeri		Vulnerable (VU)	PH		Pelobatrachus stejnegeri	FALSE	FALSE	FALSE	FALSE	FALSE	FALSE	FALSE	FALSE	FALSE	TRUE	TRUE	Megophrys stejnegeri Taylor, 1920	1920
Anura	Pelodytidae		Pelodytes	punctatus	Pelodytes punctatus		Parsley Frog	Pelodytes punctatus	Pelodytes hespericus		Least Concern (LC)	LU,BE,IT,PT,ES,FR		Pelodytes punctatus	TRUE	TRUE	TRUE	FALSE	FALSE	TRUE	FALSE	FALSE	FALSE	FALSE	TRUE	Pelodytes punctatus (Daudin, 1802)	1802
Anura	Ranidae		Pelophylax	bedriagae	Pelophylax bedriagae		Levante water frog, Levant waterfrog, Levant Green Frog, Bedriaga's Frog, Jaza' Akhdar, TÃÂ¼rkischer Wasserfrosch	Pelophylax bedriagae	Rana bedriagae, Rana levantina, Hylarana bedriagae	Rana bedriagae, Rana levantina, Hylarana bedriagae	Least Concern (LC)	EG,IR,IL,JO,LB,MT,SY,TR		Pelophylax bedriagae	FALSE	FALSE	FALSE	FALSE	FALSE	FALSE	FALSE	FALSE	FALSE	TRUE	TRUE	Pelophylax bedriagae (Camerano, 1882)	1882
Anura	Ranidae		Pelophylax	caralitanus	Pelophylax caralitanus			Pelophylax caralitanus			Near Threatened (NT)	TR		Pelophylax caralitanus	FALSE	FALSE	FALSE	FALSE	FALSE	FALSE	FALSE	FALSE	FALSE	TRUE	TRUE	Pelophylax caralitanus (Arikan, 1988)	1988
Anura	Ranidae		Pelophylax	epeiroticus	Pelophylax epeiroticus		Epirus water frog, Epirusfrosch	Pelophylax epeiroticus	Rana epeirotica	Rana epeirotica	Vulnerable (VU)	AL,GR		Pelophylax epeiroticus	FALSE	FALSE	FALSE	FALSE	FALSE	FALSE	FALSE	FALSE	FALSE	TRUE	TRUE	Pelophylax epeiroticus (Schneider, Sofianidou, and Kyriakopoulou-Sklavounou, 1984)	1984
Anura	Ranidae		Pelophylax	esculentus	Pelophylax esculentus		Edible Frog	Pelophylax esculentus	Pelophylax lessonae, Pelophylax ridibundus	Pelophylax lessonae, Pelophylax ridibundus	Least Concern (LC)	AL,AT,BY,BE,BA,BG,HR,CZ,DK,EE,FR,DE,HU,IT,LV,LI,LT,LU,MD,ME,NL,PL,RO,RU,RS,SK,SI,ES,SE,CH,UA,GB		Pelophylax esculentus	TRUE	TRUE	TRUE	FALSE	FALSE	TRUE	FALSE	FALSE	FALSE	FALSE	TRUE	Linnaeus, 1758	1758
Anura	Ranidae		Pelophylax	fukienensis	Pelophylax fukienensis			Pelophylax fukienensis	Rana fukienensis	Rana fukienensis	Least Concern (LC)	TW,CN		Pelophylax fukienensis	FALSE	FALSE	FALSE	FALSE	FALSE	FALSE	FALSE	FALSE	FALSE	TRUE	TRUE	Pelophylax fukienensis (Pope, 1929)	1929
Anura	Ranidae		Pelophylax	grafi	Pelophylax grafi		Graf's hybrid frog	Pelophylax grafi	Pelophylax perezi, Pelophylax ridibundus	Pelophylax perezi, Pelophylax ridibundus	Data Deficient (DD)	FR,ES		Pelophylax grafi	FALSE	TRUE	TRUE	FALSE	FALSE	TRUE	FALSE	FALSE	FALSE	FALSE	TRUE	Crochet, Dubois, Ohler & Tunner, 1995	1995
Anura	Ranidae		Pelophylax	kurtmuelleri	Pelophylax kurtmuelleri		Balkan frog, Grenouille des Balkans, Balkanfrosch, Nerobatrachos o balcanicos	Pelophylax kurtmuelleri	Rana kurtmuelleri, Rana balcanica, Hylarana kurtmuelleri	Rana kurtmuelleri, Rana balcanica, Hylarana kurtmuelleri	Least Concern (LC)	AL,DK,GR,IT		Pelophylax kurtmuelleri	FALSE	FALSE	FALSE	FALSE	FALSE	FALSE	FALSE	FALSE	FALSE	TRUE	TRUE	Pelophylax kurtmuelleri (Gayda, 1940)	1940
Anura	Ranidae		Pelophylax	lateralis	Pelophylax lateralis			Hylarana lateralis	Hylarana lateralis, Rana lateralis, Rana nigrolineata, Pelophylax nigrolineatus	Rana lateralis, Rana nigrolineata, Pelophylax nigrolineatus	Least Concern (LC)	KH,LA,MM,TH,VN	While not formally treated by Oliver LA, Prendini E, Kraus F, Raxworthy CJ 2015 Systematics and biogeography of the Hylarana frog (Anura: Ranidae) radiation across tropical Australasia, Southeast Asia, and Africa. Mol Phylog Evol 90: 176-192, Fros	Pelophylax lateralis	FALSE	FALSE	FALSE	FALSE	FALSE	FALSE	FALSE	FALSE	FALSE	TRUE	TRUE	"Hylarana" lateralis (Boulenger, 1887)	1887
Anura	Ranidae		Pelophylax	lessonae	Pelophylax lessonae		Pool Frog	Pelophylax lessonae	Rana esculenta, Rana lessonae, Rana lessonae pannonica	Rana esculenta, Rana lessonae, Rana lessonae pannonica	Least Concern (LC)	AT,BY,BE,BA,HR,CZ,DK,EE,FR,DE,HU,IT,KZ,LV,LI,LT,LU,MD,ME,NL,NO,PL,RO,RU,RS,SK,SI,ES,SE,CH,UA,GB		Pelophylax lessonae	TRUE	TRUE	TRUE	FALSE	FALSE	TRUE	FALSE	FALSE	TRUE	TRUE	TRUE	Pelophylax lessonae (Camerano, 1882)	1882
Anura	Ranidae		Pelophylax	nigromaculatus	Pelophylax nigromaculatus		Dark-Spotted Frog	Pelophylax nigromaculatus	Rana nigromaculata	Rana nigromaculata	Near Threatened (NT)	KR,KP,JP,RU,TW,CN		Pelophylax nigromaculatus	FALSE	FALSE	FALSE	FALSE	FALSE	FALSE	FALSE	FALSE	FALSE	TRUE	TRUE	Pelophylax nigromaculatus (Hallowell, 1861)	1861
Anura	Ranidae		Pelophylax	perezi	Pelophylax perezi		Iberian Green Frog	Pelophylax perezi	Rana grafi, Rana perezi	Rana grafi, Rana perezi	Least Concern (LC)	FR,PT,ES		Pelophylax perezi	FALSE	FALSE	FALSE	FALSE	FALSE	FALSE	FALSE	FALSE	FALSE	TRUE	TRUE	Pelophylax perezi (López-Seoane, 1885)	1885
Anura	Ranidae		Pelophylax	plancyi	Pelophylax plancyi			Pelophylax plancyi	Rana plancyi	Rana plancyi	Least Concern (LC)	CN		Pelophylax plancyi	FALSE	FALSE	FALSE	FALSE	FALSE	FALSE	FALSE	FALSE	FALSE	TRUE	TRUE	Pelophylax plancyi (Lataste, 1880)	1880
Anura	Ranidae		Pelophylax	ridibundus	Pelophylax ridibundus		Marsh Frog	Pelophylax ridibundus	Rana esculenta, Rana grafi, Rana ridibunda	Rana esculenta, Rana grafi, Rana ridibunda	Least Concern (LC)	AF,AL,AM,AT,AZ,BH,BY,BE,BA,BG,HR,CY,CZ,DK,EE,FI,FR,GE,DE,GR,HU,IQ,IL,IT,KZ,KG,LV,LT,LU,MK,MD,ME,NL,PL,RO,RU,SA,RS,SK,SI,ES,CH,TJ,TR,TM,UA,GB		Pelophylax ridibundus	FALSE	TRUE	TRUE	FALSE	FALSE	TRUE	FALSE	FALSE	FALSE	TRUE	TRUE	Pelophylax ridibundus (Pallas, 1771)	1771
Anura	Ranidae		Pelophylax	saharicus	Pelophylax saharicus		Sahara Frog, North African Water Frog, North African Green Frog, Moroccan Green Frog	Pelophylax saharicus	Rana saharica, Rana zavattarii, Hylarana saharica	Rana saharica, Rana zavattarii, Hylarana saharica	Least Concern (LC)	DZ,EG,LY,MA,TN		Pelophylax saharicus	FALSE	FALSE	FALSE	FALSE	FALSE	FALSE	FALSE	FALSE	TRUE	FALSE	TRUE	Pelophylax saharicus (Boulenger, 1913)	1913
Anura	Ranidae		Pelophylax	shqipericus	Pelophylax shqipericus			Pelophylax shqipericus	Rana shqiperica	Rana shqiperica	Endangered (EN)	AL,ME		Pelophylax shqipericus	FALSE	FALSE	FALSE	FALSE	FALSE	FALSE	FALSE	FALSE	FALSE	TRUE	TRUE	Pelophylax shqipericus (Hotz, Uzzell, Günther, Tunner, and Heppich, 1987)	1987
Anura	Ranidae		Pelophylax	tenggerensis	Pelophylax tenggerensis			Pelophylax tenggerensis	Rana tenggerensis	Rana tenggerensis	Endangered (EN)	CN		Pelophylax tenggerensis	FALSE	FALSE	FALSE	FALSE	FALSE	FALSE	FALSE	FALSE	FALSE	TRUE	TRUE	Pelophylax tenggerensis (Zhao, Macey, and Papenfuss, 1988)	1988
Anura	Bufonidae		Peltophryne	lemur	Peltophryne lemur		Puerto Rican Toad, Puerto Rican Crested Toad, sapo concho	Peltophryne lemur	Bufo lemur	Bufo lemur	Critically Endangered (CR)	PR,VG		Peltophryne lemur	FALSE	FALSE	FALSE	TRUE	FALSE	TRUE	FALSE	FALSE	TRUE	FALSE	TRUE	Peltophryne lemur Cope, 1869	1869
Anura	Bufonidae		Peltophryne	peltocephala	Peltophryne peltocephala		Eastern Cuba Giant Toad, Sapo Timbalero, Sapo	Peltophryne peltocephala	Bufo peltocephalus	Bufo peltocephalus	Least Concern (LC)	CU		Peltophryne peltocephala	FALSE	TRUE	TRUE	FALSE	FALSE	TRUE	FALSE	FALSE	FALSE	FALSE	TRUE	Peltophryne peltocephala (Tschudi, 1838)	1838
Anura	Petropedetidae		Petropedetes	johnstoni	Petropedetes johnstoni			Petropedetes johnstoni	Petropedetes newtoni		Near Threatened (NT)	CM		Petropedetes johnstoni	FALSE	FALSE	FALSE	TRUE	FALSE	TRUE	FALSE	FALSE	FALSE	FALSE	TRUE	Petropedetes johnstoni (Boulenger, 1888)	1888
Anura	Rhacophoridae	Rhacophorinae	Philautus	petersi	Philautus petersi			Philautus petersi			Least Concern (LC)	ID,MY		Philautus petersi	FALSE	FALSE	FALSE	TRUE	FALSE	TRUE	FALSE	FALSE	FALSE	FALSE	TRUE	Philautus petersi (Boulenger, 1900)	1900
Anura	Rhacophoridae	Rhacophorinae	Philautus	tectus	Philautus tectus			Philautus tectus			Vulnerable (VU)	MY		Philautus tectus	FALSE	FALSE	FALSE	TRUE	FALSE	TRUE	FALSE	FALSE	FALSE	FALSE	TRUE	Philautus tectus Dring, 1987	1987
Anura	Hyperoliidae		Phlyctimantis	boulengeri	Phlyctimantis boulengeri			Phlyctimantis boulengeri			Least Concern (LC)	CM,CI,GQ,GA,GH,GN,LR,NG		Phlyctimantis boulengeri	FALSE	FALSE	FALSE	TRUE	FALSE	TRUE	FALSE	FALSE	FALSE	FALSE	TRUE	Phlyctimantis boulengeri Perret, 1986	1986
Anura	Hyperoliidae		Phlyctimantis	leonardi	Phlyctimantis leonardi			Phlyctimantis leonardi			Least Concern (LC)	CG,CD,GA		Phlyctimantis leonardi	FALSE	FALSE	FALSE	TRUE	FALSE	TRUE	FALSE	FALSE	FALSE	FALSE	TRUE	Phlyctimantis leonardi (Boulenger, 1906)	1906
Anura	Hyperoliidae		Phlyctimantis	maculatus	Phlyctimantis maculatus		Red-legged kassina	Kassina maculata	Kassina maculata		Least Concern (LC)	KE,MW,MZ,ZA,SZ,TZ		Phlyctimantis maculatus	TRUE	TRUE	TRUE	TRUE	FALSE	TRUE	FALSE	FALSE	TRUE	TRUE	TRUE	Phlyctimantis maculatus (Duméril, 1853)	1853
Anura	Hyperoliidae		Phlyctimantis	verrucosus	Phlyctimantis verrucosus			Phlyctimantis verrucosus			Least Concern (LC)	CD,RW,UG		Phlyctimantis verrucosus	FALSE	FALSE	FALSE	TRUE	FALSE	TRUE	FALSE	FALSE	FALSE	FALSE	TRUE	Phlyctimantis verrucosus (Boulenger, 1912)	1912
Anura	Phrynobatrachidae		Phrynobatrachus	accraensis	Phrynobatrachus accraensis			Phrynobatrachus latifrons	Phrynobatrachus latifrons, Hylarthroleptis accraensis	Hylarthroleptis accraensis	Least Concern (LC)	BJ,BF,CM,CI,GM,GH,GN,LR,ML,NG,SN,SL,TG		Phrynobatrachus accraensis	FALSE	FALSE	FALSE	TRUE	FALSE	TRUE	FALSE	FALSE	FALSE	FALSE	TRUE	Ahl, 1925	1925
Anura	Phrynobatrachidae		Phrynobatrachus	asper	Phrynobatrachus asper			Phrynobatrachus asper			Vulnerable (VU)	CD		Phrynobatrachus asper	FALSE	FALSE	FALSE	TRUE	FALSE	TRUE	FALSE	FALSE	FALSE	TRUE	TRUE	Phrynobatrachus asper Laurent, 1951	1951
Anura	Phrynobatrachidae		Phrynobatrachus	auritus	Phrynobatrachus auritus			Phrynobatrachus auritus			Least Concern (LC)	CM,CF,CG,CD,GQ,GA,NG,RW,UG		Phrynobatrachus auritus	FALSE	FALSE	FALSE	TRUE	FALSE	TRUE	FALSE	FALSE	FALSE	FALSE	TRUE	Phrynobatrachus auritus Boulenger, 1900	1900
Anura	Phrynobatrachidae		Phrynobatrachus	calcaratus	Phrynobatrachus calcaratus			Phrynobatrachus calcaratus			Least Concern (LC)	CM,CF,CD,GQ,GA,GH,GN,LR,NG,SN,TG		Phrynobatrachus calcaratus	FALSE	FALSE	FALSE	TRUE	FALSE	TRUE	FALSE	FALSE	FALSE	FALSE	TRUE	Phrynobatrachus calcaratus (Peters, 1863)	1863
Anura	Phrynobatrachidae		Phrynobatrachus	krefftii	Phrynobatrachus krefftii			Phrynobatrachus krefftii			Endangered (EN)	TZ		Phrynobatrachus krefftii	FALSE	FALSE	FALSE	TRUE	FALSE	TRUE	FALSE	FALSE	FALSE	FALSE	TRUE	Phrynobatrachus krefftii Boulenger, 1909	1909
Anura	Phrynobatrachidae		Phrynobatrachus	mababiensis	Phrynobatrachus mababiensis		Mababe puddle frog	Phrynobatrachus mababiensis			Least Concern (LC)	AO,BW,CD,KE,MW,MZ,NA,ZA,SZ,TZ,ZM,ZW		Phrynobatrachus mababiensis	FALSE	FALSE	FALSE	TRUE	FALSE	TRUE	FALSE	FALSE	FALSE	FALSE	TRUE	Phrynobatrachus mababiensis FitzSimons, 1932	1932
Anura	Phrynobatrachidae		Phrynobatrachus	minutus	Phrynobatrachus minutus			Phrynobatrachus minutus			Least Concern (LC)	ET		Phrynobatrachus minutus	FALSE	FALSE	FALSE	TRUE	FALSE	TRUE	FALSE	FALSE	FALSE	FALSE	TRUE	Phrynobatrachus minutus (Boulenger, 1895)	1895
Anura	Phrynobatrachidae		Phrynobatrachus	natalensis	Phrynobatrachus natalensis		Natal puddle frog	Phrynobatrachus natalensis	Stenorhynchus natalensis	Stenorhynchus natalensis	Least Concern (LC)	AO,BJ,BW,BI,CM,CF,CG,CD,ET,GM,GH,GN,GW,KE,LR,MW,ML,MR,MZ,NA,NG,RW,SN,SL,ZA,SS,SZ,TZ,TG,UG,ZM,ZW		Phrynobatrachus natalensis	FALSE	FALSE	FALSE	TRUE	FALSE	TRUE	FALSE	FALSE	FALSE	FALSE	TRUE	Phrynobatrachus natalensis (Smith, 1849)	1849
Anura	Phrynobatrachidae		Phrynobatrachus	parkeri	Phrynobatrachus parkeri			Phrynobatrachus parkeri			Least Concern (LC)	CD		Phrynobatrachus parkeri	FALSE	FALSE	FALSE	TRUE	FALSE	TRUE	FALSE	FALSE	FALSE	FALSE	TRUE	Phrynobatrachus parkeri De Witte, 1933	1933
Anura	Phrynobatrachidae		Phrynobatrachus	parvulus	Phrynobatrachus parvulus			Phrynobatrachus parvulus			Least Concern (LC)	AO,BW,CD,MW,NA,TZ,UG,ZM,ZW		Phrynobatrachus parvulus	FALSE	FALSE	FALSE	TRUE	FALSE	TRUE	FALSE	FALSE	FALSE	FALSE	TRUE	Phrynobatrachus parvulus (Boulenger, 1905)	1905
Anura	Phrynobatrachidae		Phrynobatrachus	plicatus	Phrynobatrachus plicatus			Phrynobatrachus plicatus			Least Concern (LC)	CI,GH,GN,LR,NG,TG		Phrynobatrachus plicatus	FALSE	FALSE	FALSE	TRUE	FALSE	TRUE	FALSE	FALSE	FALSE	FALSE	TRUE	Phrynobatrachus plicatus (Günther, 1858)	1858
Anura	Phrynobatrachidae		Phrynobatrachus	ukingensis	Phrynobatrachus ukingensis			Phrynobatrachus ukingensis			Least Concern (LC)	TZ,MW		Phrynobatrachus ukingensis	FALSE	FALSE	FALSE	TRUE	FALSE	TRUE	FALSE	FALSE	FALSE	FALSE	TRUE	Phrynobatrachus ukingensis (Loveridge, 1932)	1932
Anura	Bufonidae		Phrynoidis	aspera	Phrynoidis aspera		River Toad, Rough Toad, Giant Asian Toad, Kodok Buduk Sungal, Kodok Puru Besar	Phrynoidis asper	Phrynoidis asper, Bufo asper	Bufo asper	Least Concern (LC)	BN,ID,MY,MM,TH,VN		Phrynoidis aspera	TRUE	TRUE	TRUE	FALSE	FALSE	TRUE	FALSE	FALSE	TRUE	TRUE	TRUE	Phrynoidis asper (Gravenhorst, 1829)	1829
Anura	Bufonidae		Phrynoidis	juxtasper	Phrynoidis juxtasper			Phrynoidis juxtaspera	Phrynoidis juxtaspera, Bufo juxtasper	Bufo juxtasper	Least Concern (LC)	MY,ID		Phrynoidis juxtasper	FALSE	FALSE	FALSE	FALSE	FALSE	FALSE	FALSE	FALSE	FALSE	TRUE	TRUE	Phrynoidis juxtasper (Inger, 1964)	1964
Anura	Microhylidae	Phrynomerinae	Phrynomantis	bifasciatus	Phrynomantis bifasciatus		Red-Banded Rubber Frog, Red-banded Frog, South African Snake-Necked Frog	Phrynomantis bifasciatus			Least Concern (LC)	AO,BW,CD,KE,MW,MZ,NA,SO,ZA,SZ,TZ,ZM,ZW		Phrynomantis bifasciatus	TRUE	TRUE	TRUE	TRUE	FALSE	TRUE	FALSE	FALSE	TRUE	TRUE	TRUE	Phrynomantis bifasciatus (Smith, 1847)	1847
Anura	Microhylidae	Phrynomerinae	Phrynomantis	microps	Phrynomantis microps			Phrynomantis microps			Least Concern (LC)	BJ,BF,CM,CF,TD,CD,CI,GM,GH,GN,GW,ML,NE,NG,SN,SL,SS,TG		Phrynomantis microps	TRUE	FALSE	TRUE	FALSE	FALSE	TRUE	FALSE	FALSE	TRUE	FALSE	TRUE	Phrynomantis microps Peters, 1875	1875
Anura	Dendrobatidae	Dendrobatinae	Phyllobates	aurotaenia	Phyllobates aurotaenia		KÃÂµkoÃÂ©	Phyllobates aurotaenia			Least Concern (LC)	CO		Phyllobates aurotaenia	TRUE	TRUE	TRUE	TRUE	TRUE	TRUE	TRUE	II	TRUE	TRUE	TRUE	Phyllobates aurotaenia (Boulenger, 1913)	1913
Anura	Dendrobatidae	Dendrobatinae	Phyllobates	bicolor	Phyllobates bicolor		Black Leg Poison Dart Frog, NearÃÂ¡	Phyllobates bicolor			Endangered (EN)	CO		Phyllobates bicolor	TRUE	TRUE	TRUE	TRUE	TRUE	TRUE	TRUE	II	TRUE	TRUE	TRUE	Phyllobates bicolor Bibron, 1840	1840
Anura	Dendrobatidae	Dendrobatinae	Phyllobates	lugubris	Phyllobates lugubris		Striped Poison-Dart Frog, Lovely Poison Frog	Phyllobates lugubris			Least Concern (LC)	PA,CR		Phyllobates lugubris	TRUE	TRUE	TRUE	TRUE	TRUE	TRUE	TRUE	II	TRUE	TRUE	TRUE	Phyllobates lugubris (Schmidt, 1857)	1857
Anura	Dendrobatidae	Dendrobatinae	Phyllobates	terribilis	Phyllobates terribilis		Golden Poison Frog	Phyllobates terribilis			Endangered (EN)	CO		Phyllobates terribilis	TRUE	TRUE	TRUE	TRUE	TRUE	TRUE	TRUE	II	TRUE	TRUE	TRUE	Phyllobates terribilis Myers, Daly, and Malkin, 1978	1978
Anura	Dendrobatidae	Dendrobatinae	Phyllobates	vittatus	Phyllobates vittatus		Golfo Dulce Poison-Dart Frog	Phyllobates vittatus			Endangered (EN)	CR		Phyllobates vittatus	TRUE	TRUE	TRUE	TRUE	TRUE	TRUE	TRUE	II	TRUE	TRUE	TRUE	Phyllobates vittatus (Cope, 1893)	1893
Anura	Hylidae	Phyllomedusinae	Phyllomedusa	atelopoides	Phyllomedusa atelopoides			Callimedusa atelopoides	Callimedusa atelopoides		Least Concern (LC)	BR,PE		Phyllomedusa atelopoides	FALSE	FALSE	FALSE	TRUE	FALSE	TRUE	FALSE	FALSE	TRUE	FALSE	TRUE	Callimedusa atelopoides (Duellman, Cadle, and Cannatella, 1988)	1988
Anura	Hylidae	Phyllomedusinae	Phyllomedusa	azurea	Phyllomedusa azurea			Pithecopus azureus	Pithecopus azureus		Data Deficient (DD)	AR,BO,BR,PY		Phyllomedusa azurea	FALSE	TRUE	TRUE	FALSE	FALSE	TRUE	FALSE	FALSE	TRUE	FALSE	TRUE	Pithecopus azureus (Cope, 1862)	1862
Anura	Hylidae	Phyllomedusinae	Phyllomedusa	bicolor	Phyllomedusa bicolor		Waxy-Monkey Treefrog	Phyllomedusa bicolor			Least Concern (LC)	BO,BR,CO,EC,GF,GY,PE,SR,VE		Phyllomedusa bicolor	TRUE	TRUE	TRUE	TRUE	FALSE	TRUE	FALSE	FALSE	TRUE	TRUE	TRUE	Phyllomedusa bicolor (Boddaert, 1772)	1772
Anura	Hylidae	Phyllomedusinae	Phyllomedusa	boliviana	Phyllomedusa boliviana			Phyllomedusa boliviana	Phyllomedusa pailona, Pithecopus boliviana	Phyllomedusa pailona, Pithecopus boliviana	Least Concern (LC)	BR,BO,AR		Phyllomedusa boliviana	FALSE	TRUE	TRUE	FALSE	FALSE	TRUE	FALSE	FALSE	FALSE	FALSE	TRUE	Phyllomedusa boliviana Boulenger, 1902	1902
Anura	Hylidae	Phyllomedusinae	Phyllomedusa	burmeisteri	Phyllomedusa burmeisteri			Phyllomedusa burmeisteri			Least Concern (LC)	BR		Phyllomedusa burmeisteri	TRUE	TRUE	TRUE	FALSE	FALSE	TRUE	FALSE	FALSE	FALSE	FALSE	TRUE	Phyllomedusa burmeisteri Boulenger, 1882	1882
Anura	Hylidae	Phyllomedusinae	Phyllomedusa	ecuatoriana	Phyllomedusa ecuatoriana			Callimedusa ecuatoriana	Callimedusa ecuatoriana		Endangered (EN)	EC		Phyllomedusa ecuatoriana	TRUE	FALSE	TRUE	FALSE	FALSE	TRUE	FALSE	FALSE	FALSE	FALSE	TRUE	Callimedusa ecuatoriana (Cannatella, 1982)	1982
Anura	Hylidae	Phyllomedusinae	Phyllomedusa	hypochondrialis	Phyllomedusa hypochondrialis			Pithecopus azureus	Pithecopus azureus, Phyllomedusa hypocondrialis	Phyllomedusa hypocondrialis	Data Deficient (DD)	AR,BO,BR,CO,GY,PY,SR,VE		Phyllomedusa hypochondrialis	TRUE	TRUE	TRUE	FALSE	FALSE	TRUE	FALSE	FALSE	TRUE	TRUE	TRUE	Pithecopus hypochondrialis (Daudin, 1800)	1800
Anura	Hylidae	Phyllomedusinae	Phyllomedusa	iheringii	Phyllomedusa iheringii			Phyllomedusa iheringii			Least Concern (LC)	UY,BR,AR		Phyllomedusa iheringii	FALSE	FALSE	FALSE	FALSE	FALSE	FALSE	FALSE	FALSE	FALSE	TRUE	TRUE	Phyllomedusa iheringii Boulenger, 1885	1885
Anura	Hylidae	Phyllomedusinae	Phyllomedusa	sauvagii	Phyllomedusa sauvagii		Waxy Monkey Tree Frog, Waxy Monkey Leaf Frog, Painted-bellied Tree Frog, Painted-belly Monkey Frog, Painted-belly Leaf Frog	Phyllomedusa sauvagii			Least Concern (LC)	PY,BR,BO,AR		Phyllomedusa sauvagii	TRUE	TRUE	TRUE	TRUE	TRUE	TRUE	FALSE	FALSE	TRUE	TRUE	TRUE	Phyllomedusa sauvagii Boulenger, 1882	1882
Anura	Hylidae	Phyllomedusinae	Phyllomedusa	tarsius	Phyllomedusa tarsius			Phyllomedusa tarsius	Phyllomedusa edentula, Phyllomedusa nicefori, Phyllomedusa orcesi	Phyllomedusa edentula, Phyllomedusa nicefori, Phyllomedusa orcesi	Least Concern (LC)	CO,EC,PE,VE		Phyllomedusa tarsius	FALSE	TRUE	TRUE	FALSE	FALSE	TRUE	FALSE	FALSE	FALSE	FALSE	TRUE	Phyllomedusa tarsius (Cope, 1868)	1868
Anura	Hylidae	Phyllomedusinae	Phyllomedusa	tetraploidea	Phyllomedusa tetraploidea			Phyllomedusa tetraploidea			Least Concern (LC)	BR		Phyllomedusa tetraploidea	FALSE	FALSE	FALSE	TRUE	FALSE	TRUE	FALSE	FALSE	TRUE	FALSE	TRUE	Phyllomedusa tetraploidea Pombal and Haddad, 1992	1992
Anura	Hylidae	Phyllomedusinae	Phyllomedusa	tomopterna	Phyllomedusa tomopterna		Tiger-striped Leaf Frog	Callimedusa tomopterna	Callimedusa tomopterna		Least Concern (LC)	BO,BR,CO,EC,GF,GY,PE,SR,VE		Phyllomedusa tomopterna	TRUE	TRUE	TRUE	TRUE	FALSE	TRUE	FALSE	FALSE	TRUE	FALSE	TRUE	Callimedusa tomopterna (Cope, 1868)	1868
Anura	Hylidae	Phyllomedusinae	Phyllomedusa	trinitatis	Phyllomedusa trinitatis		Trinidad Leaf-nesting Frog	Phyllomedusa trinitatis			Least Concern (LC)	BR,SR,GF,GY,VE,TT		Phyllomedusa trinitatis	TRUE	TRUE	TRUE	FALSE	FALSE	TRUE	FALSE	FALSE	FALSE	FALSE	TRUE	Phyllomedusa trinitatis Mertens, 1926	1926
Anura	Hylidae	Phyllomedusinae	Phyllomedusa	vaillantii	Phyllomedusa vaillantii			Phyllomedusa vaillantii	Phyllomedusa blombergi, Phyllomedusa feltoni, Phyllomedusa perlata	Phyllomedusa blombergi, Phyllomedusa feltoni, Phyllomedusa perlata	Least Concern (LC)	BO,BR,CO,EC,GF,GY,PE,SR,VE		Phyllomedusa vaillantii	TRUE	TRUE	TRUE	FALSE	FALSE	TRUE	FALSE	FALSE	TRUE	FALSE	TRUE	Phyllomedusa vaillantii Boulenger, 1882	1882
Anura	Leptodactylidae	Leiuperinae	Physalaemus	biligonigerus	Physalaemus biligonigerus			Physalaemus biligonigerus			Least Concern (LC)	UY,PY,BR,BO,AR		Physalaemus biligonigerus	FALSE	FALSE	FALSE	FALSE	FALSE	FALSE	FALSE	FALSE	TRUE	TRUE	TRUE	Physalaemus biligonigerus (Cope, 1861)	1861
Anura	Leptodactylidae	Leiuperinae	Physalaemus	cuvieri	Physalaemus cuvieri			Physalaemus cuvieri			Least Concern (LC)	AR,BR,PY,UY		Physalaemus cuvieri	FALSE	FALSE	FALSE	TRUE	FALSE	TRUE	FALSE	FALSE	FALSE	FALSE	TRUE	Physalaemus cuvieri Fitzinger, 1826	1826
Anura	Pipidae		Pipa	carvalhoi	Pipa carvalhoi		Carvalho's Surinam Toad	Pipa carvalhoi			Least Concern (LC)	BR		Pipa carvalhoi	TRUE	TRUE	TRUE	FALSE	FALSE	TRUE	FALSE	FALSE	FALSE	FALSE	TRUE	Pipa carvalhoi (Miranda-Ribeiro, 1937)	1937
Anura	Pipidae		Pipa	parva	Pipa parva			Pipa parva			Least Concern (LC)	VE,CO		Pipa parva	TRUE	TRUE	TRUE	FALSE	FALSE	TRUE	FALSE	FALSE	FALSE	FALSE	TRUE	Pipa parva Ruthven and Gaige, 1923	1923
Anura	Pipidae		Pipa	pipa	Pipa pipa		Surinam toad, Star-fingered Frog	Pipa pipa			Least Concern (LC)	BO,BR,CO,EC,GF,GY,PE,SR,TT,VE		Pipa pipa	TRUE	TRUE	TRUE	TRUE	FALSE	TRUE	FALSE	FALSE	TRUE	FALSE	TRUE	Pipa pipa (Linnaeus, 1758)	1758
Anura	Pipidae		Pipa	snethlageae	Pipa snethlageae			Pipa snethlageae			Least Concern (LC)	PE,CO,BR		Pipa snethlageae	FALSE	FALSE	FALSE	FALSE	FALSE	FALSE	FALSE	FALSE	FALSE	TRUE	TRUE	Pipa snethlageae Müller, 1914	1914
Anura	Ceratobatrachidae	Ceratobatrachinae	Platymantis	guentheri	Platymantis guentheri		Guenther's Forest Frog, Gunther's Wrinkled Ground Frog	Platymantis guentheri	Platymantis ingeri, Cornufer guentheri, Cornufer ingeri	Cornufer guentheri, Cornufer ingeri	Vulnerable (VU)	PH		Platymantis guentheri	TRUE	FALSE	TRUE	FALSE	FALSE	TRUE	FALSE	FALSE	FALSE	FALSE	TRUE	Platymantis guentheri (Boulenger, 1882)	1882
Anura	Microhylidae	Cophylinae	Platypelis	milloti	Platypelis milloti			Cophyla milloti	Cophyla milloti		Endangered (EN)	MG		Platypelis milloti	FALSE	FALSE	FALSE	TRUE	FALSE	TRUE	FALSE	FALSE	FALSE	FALSE	TRUE	Cophyla milloti (Guibé, 1950)	1950
Anura	Hylidae	Hylinae	Plectrohyla	dasypus	Plectrohyla dasypus			Plectrohyla dasypus			Critically Endangered (CR)	HN		Plectrohyla dasypus	FALSE	FALSE	FALSE	FALSE	FALSE	FALSE	FALSE	FALSE	FALSE	TRUE	TRUE	Plectrohyla dasypus McCranie and Wilson, 1981	1981
Anura	Hylidae	Hylinae	Plectrohyla	exquisita	Plectrohyla exquisita			Plectrohyla exquisita			Critically Endangered (CR)	HN		Plectrohyla exquisita	FALSE	FALSE	FALSE	FALSE	FALSE	FALSE	FALSE	FALSE	FALSE	TRUE	TRUE	Plectrohyla exquisita McCranie and Wilson, 1998	1998
Anura	Hylidae	Hylinae	Plectrohyla	ixil	Plectrohyla ixil			Plectrohyla ixil			Critically Endangered (CR)	GT,MX		Plectrohyla ixil	FALSE	FALSE	FALSE	TRUE	FALSE	TRUE	FALSE	FALSE	FALSE	FALSE	TRUE	Plectrohyla ixil Stuart, 1942	1942
Caudata	Plethodontidae	Plethodontinae	Plethodon	chlorobryonis	Plethodon chlorobryonis	Plethodon	Atlantic Coast Slimy Salamander				NA	US		Plethodon chlorobryonis	FALSE	TRUE	TRUE	FALSE	FALSE	TRUE	FALSE	FALSE	FALSE	FALSE	TRUE	Plethodon chlorobryonis Mittleman, 1951	1951
Caudata	Plethodontidae	Plethodontinae	Plethodon	cinereus	Plethodon cinereus	Plethodon	Eastern Red-backed Salamander, Red-backed Salamander, (Northern Redback Salamander)	Plethodon cinereus	Salamandra cinerea	Salamandra cinerea	Least Concern (LC)	US,CA		Plethodon cinereus	TRUE	FALSE	TRUE	TRUE	FALSE	TRUE	FALSE	FALSE	TRUE	TRUE	TRUE	Plethodon cinereus (Green, 1818)	1818
Caudata	Plethodontidae	Plethodontinae	Plethodon	dorsalis	Plethodon dorsalis	Plethodon	Northern Zigzag Salamander, Zigzag Salamander	Plethodon dorsalis			Least Concern (LC)	US		Plethodon dorsalis	TRUE	FALSE	TRUE	FALSE	FALSE	TRUE	FALSE	FALSE	FALSE	FALSE	TRUE	Plethodon dorsalis Cope, 1889	1889
Caudata	Plethodontidae	Plethodontinae	Plethodon	elongatus	Plethodon elongatus	Hightonia	Del Norte Salamander	Plethodon elongatus			Near Threatened (NT)	US		Plethodon elongatus	FALSE	TRUE	TRUE	FALSE	FALSE	TRUE	FALSE	FALSE	FALSE	FALSE	TRUE	Plethodon elongatus Van Denburgh, 1916	1916
Caudata	Plethodontidae	Plethodontinae	Plethodon	glutinosus	Plethodon glutinosus	Plethodon	Northern Slimy Salamander	Plethodon glutinosus			Least Concern (LC)	US		Plethodon glutinosus	TRUE	TRUE	TRUE	FALSE	FALSE	TRUE	FALSE	FALSE	TRUE	FALSE	TRUE	Plethodon glutinosus (Green, 1818)	1818
Caudata	Plethodontidae	Plethodontinae	Plethodon	idahoensis	Plethodon idahoensis	Hightonia	Coeur d'Alene Salamander	Plethodon idahoensis			Least Concern (LC)	CA,US		Plethodon idahoensis	FALSE	FALSE	FALSE	FALSE	FALSE	FALSE	FALSE	FALSE	FALSE	TRUE	TRUE	Plethodon idahoensis Slater and Slipp, 1940	1940
Caudata	Plethodontidae	Plethodontinae	Plethodon	jordani	Plethodon jordani	Plethodon	Jordan's Salamander, Red-Cheecked Salamander, Jordan's Redcheeck Salamander	Plethodon jordani			Near Threatened (NT)	US		Plethodon jordani	FALSE	TRUE	TRUE	TRUE	FALSE	TRUE	FALSE	FALSE	FALSE	FALSE	TRUE	Plethodon jordani Blatchley, 1901	1901
Caudata	Plethodontidae	Plethodontinae	Plethodon	larselli	Plethodon larselli	Hightonia	Larch Mountain salamander	Plethodon larselli			Near Threatened (NT)	US		Plethodon larselli	FALSE	FALSE	FALSE	TRUE	FALSE	TRUE	FALSE	FALSE	FALSE	FALSE	TRUE	Plethodon larselli Burns, 1954	1954
Caudata	Plethodontidae	Plethodontinae	Plethodon	metcalfi	Plethodon metcalfi	Plethodon	Southern Gray-cheeked Salamander, Southern Graycheek Salamander	Plethodon metcalfi			Least Concern (LC)	US		Plethodon metcalfi	FALSE	TRUE	TRUE	FALSE	FALSE	TRUE	FALSE	FALSE	FALSE	FALSE	TRUE	Plethodon metcalfi Brimley, 1912	1912
Caudata	Plethodontidae	Plethodontinae	Plethodon	montanus	Plethodon montanus	Plethodon	Northern Gray-cheeked Salamander, Northern Graycheek Salamander	Plethodon montanus			Least Concern (LC)	US		Plethodon montanus	FALSE	TRUE	TRUE	FALSE	FALSE	TRUE	FALSE	FALSE	FALSE	FALSE	TRUE	Plethodon montanus Highton and Peabody, 2000	2000
Caudata	Plethodontidae	Plethodontinae	Plethodon	neomexicanus	Plethodon neomexicanus	Hightonia	Jemez Mountains Salamander	Plethodon neomexicanus			Near Threatened (NT)	US		Plethodon neomexicanus	FALSE	FALSE	FALSE	FALSE	FALSE	FALSE	FALSE	FALSE	TRUE	FALSE	TRUE	Plethodon neomexicanus Stebbins and Riemer, 1950	1950
Caudata	Plethodontidae	Plethodontinae	Plethodon	petraeus	Plethodon petraeus	Plethodon	Pigeon Mountain Salamander	Plethodon petraeus			Vulnerable (VU)	US		Plethodon petraeus	FALSE	FALSE	FALSE	FALSE	FALSE	FALSE	FALSE	FALSE	FALSE	TRUE	TRUE	Plethodon petraeus Wynn, Highton, and Jacobs, 1988	1988
Caudata	Plethodontidae	Plethodontinae	Plethodon	shermani	Plethodon shermani	Plethodon	Red-legged Salamander	Plethodon shermani			Vulnerable (VU)	US		Plethodon shermani	FALSE	TRUE	TRUE	FALSE	FALSE	TRUE	FALSE	FALSE	FALSE	FALSE	TRUE	Plethodon shermani Stejneger, 1906	1906
Caudata	Plethodontidae	Plethodontinae	Plethodon	teyahalee	Plethodon teyahalee	Plethodon	Southern Appalachian Salamander	Plethodon teyahalee	Plethodon oconaluftee		Least Concern (LC)	US		Plethodon teyahalee	TRUE	TRUE	TRUE	FALSE	FALSE	TRUE	FALSE	FALSE	FALSE	FALSE	TRUE	Plethodon teyahalee Hairston, 1950	1950
Caudata	Plethodontidae	Plethodontinae	Plethodon	vehiculum	Plethodon vehiculum	Hightonia	Western Red-backed Salamander, Western Redback Salamander	Plethodon vehiculum	Ambystoma vehiculum	Ambystoma vehiculum	Least Concern (LC)	US,CA		Plethodon vehiculum	FALSE	TRUE	TRUE	FALSE	FALSE	TRUE	FALSE	FALSE	FALSE	FALSE	TRUE	Plethodon vehiculum (Cooper, 1860)	1860
Caudata	Plethodontidae	Plethodontinae	Plethodon	yonahlossee	Plethodon yonahlossee	Plethodon	Yonahlossee Salamander	Plethodon yonahlossee			Least Concern (LC)	US		Plethodon yonahlossee	FALSE	FALSE	FALSE	TRUE	FALSE	TRUE	FALSE	FALSE	FALSE	FALSE	TRUE	Plethodon yonahlossee Dunn, 1917	1917
Anura	Microhylidae	Cophylinae	Plethodontohyla	tuberata	Plethodontohyla tuberata			Plethodontohyla tuberata			Near Threatened (NT)	MG		Plethodontohyla tuberata	FALSE	FALSE	FALSE	FALSE	FALSE	FALSE	FALSE	FALSE	TRUE	FALSE	TRUE	Plethodontohyla tuberata (Peters, 1883)	1883
Caudata	Salamandridae	Pleurodelinae	Pleurodeles	nebulosus	Pleurodeles nebulosus		Algerian Ribbed Newt	Pleurodeles nebulosus			Vulnerable (VU)	DZ,TN		Pleurodeles nebulosus	FALSE	TRUE	TRUE	FALSE	FALSE	TRUE	FALSE	FALSE	FALSE	FALSE	TRUE	Pleurodeles nebulosus (Guichenot, 1850)	1850
Caudata	Salamandridae	Pleurodelinae	Pleurodeles	poireti	Pleurodeles poireti		Algerian Newt	Pleurodeles poireti			Endangered (EN)	DZ		Pleurodeles poireti	FALSE	FALSE	FALSE	TRUE	FALSE	TRUE	FALSE	FALSE	FALSE	FALSE	TRUE	Pleurodeles poireti (Gervais, 1835)	1835
Caudata	Salamandridae	Pleurodelinae	Pleurodeles	waltl	Pleurodeles waltl		Spanish newt, Ribbed newt, Sharp-ribbed salamander, Spanischer rippenmolch, Gallipato, Ofegabous, Spansk ribbenssalamander, Hispaania ribivesilik, pleurodÃÂ¨le de Waltl, triton Ã cÃÂ´tes, pleurodele di Waltl, Ribbensalamander, Salamandra-de	Pleurodeles waltl			Near Threatened (NT)	MA,ES,PT		Pleurodeles waltl	TRUE	TRUE	TRUE	TRUE	FALSE	TRUE	FALSE	FALSE	TRUE	FALSE	TRUE	Pleurodeles waltl Michahelles, 1830	1830
Anura	Leptodactylidae	Leiuperinae	Pleurodema	brachyops	Pleurodema brachyops		Stout Four-eyed Frog	Pleurodema brachyops			Least Concern (LC)	AW,AN,PA,CO,VE,BR,GY		Pleurodema brachyops	TRUE	FALSE	TRUE	TRUE	FALSE	TRUE	FALSE	FALSE	TRUE	FALSE	TRUE	Pleurodema brachyops (Cope, 1869)	1869
Anura	Rhacophoridae	Rhacophorinae	Polypedates	colletti	Polypedates colletti			Polypedates colletti			Least Concern (LC)	ID,MY,TH,VN		Polypedates colletti	FALSE	TRUE	TRUE	TRUE	FALSE	TRUE	FALSE	FALSE	FALSE	FALSE	TRUE	Polypedates colletti (Boulenger, 1890)	1890
Anura	Rhacophoridae	Rhacophorinae	Polypedates	leucomystax	Polypedates leucomystax		Common Tree Frog, Asian Brown Treefrog, Four-Lined Tree Frog, Golden Tree Frog	Polypedates leucomystax	Polypedates teraiensis		Least Concern (LC)	BD,IN,ID,JP,LA,MY,MM,PH,SG,TH,VN		Polypedates leucomystax	TRUE	TRUE	TRUE	TRUE	FALSE	TRUE	FALSE	FALSE	TRUE	TRUE	TRUE	Polypedates leucomystax (Gravenhorst, 1829)	1829
Anura	Rhacophoridae	Rhacophorinae	Polypedates	megacephalus	Polypedates megacephalus		White-spotted Thigh Treefrog	Polypedates megacephalus			Least Concern (LC)	CN,GU,HK,IN,JP,MO,MM,TW,TH,VN		Polypedates megacephalus	FALSE	TRUE	TRUE	FALSE	FALSE	TRUE	FALSE	FALSE	FALSE	FALSE	TRUE	Polypedates megacephalus Hallowell, 1861	1861
Anura	Rhacophoridae	Rhacophorinae	Polypedates	otilophus	Polypedates otilophus		File-Eared Tree Frog	Polypedates otilophus			Least Concern (LC)	MY,ID		Polypedates otilophus	TRUE	TRUE	TRUE	TRUE	FALSE	TRUE	FALSE	FALSE	TRUE	FALSE	TRUE	Polypedates otilophus (Boulenger, 1893)	1893
Anura	Rhacophoridae	Rhacophorinae	Polypedates	pseudotilophus	Polypedates pseudotilophus						NA	ID		Polypedates pseudotilophus	FALSE	FALSE	FALSE	FALSE	FALSE	FALSE	FALSE	FALSE	FALSE	TRUE	TRUE	Polypedates pseudotilophus Matsui, Hamidy, and Kuraishi, 2014	2014
Anura	Rhacophoridae	Rhacophorinae	Polypedates	teraiensis	Polypedates teraiensis			Polypedates leucomystax	Polypedates leucomystax		Least Concern (LC)	BD,IN,MM,NP	This taxon is also treated as a subspecies of Polypedates leucomystax. Status as species unclear.	Polypedates teraiensis	TRUE	TRUE	TRUE	TRUE	FALSE	TRUE	FALSE	FALSE	FALSE	FALSE	TRUE	Polypedates teraiensis (Dubois, 1987)	1987
Gymnophiona	Typhlonectidae		Potamotyphlus	kaupii	Potamotyphlus kaupii		Kaup's Caecilian	Potomotyphlus kaupii	Potomotyphlus kaupii		Least Concern (LC)	GF,GY,BR,PE,EC,CO,VE		Potamotyphlus kaupii	TRUE	TRUE	TRUE	FALSE	FALSE	TRUE	FALSE	FALSE	FALSE	FALSE	TRUE	Potamotyphlus kaupii (Berthold, 1859)	1859
Anura	Strabomantidae	Pristimantinae	Pristimantis	cerasinus	Pristimantis cerasinus			Pristimantis cerasinus	Eleutherodactylus cerasinus, Eleutherodactylus peraltae, Eleutherodactylus tiptoni	Eleutherodactylus cerasinus, Eleutherodactylus peraltae, Eleutherodactylus tiptoni	Least Concern (LC)	CR,HN,NI,PA		Pristimantis cerasinus	FALSE	FALSE	FALSE	TRUE	FALSE	TRUE	FALSE	FALSE	FALSE	FALSE	TRUE	Pristimantis cerasinus (Cope, 1875)	1875
Anura	Strabomantidae	Pristimantinae	Pristimantis	cruentus	Pristimantis cruentus		Chiriqui Robber Frog	Pristimantis cruentus	Eleutherodactylus cruentus, Eleutherodactylus dubitus, Eleutherodactylus lutosus	Eleutherodactylus cruentus, Eleutherodactylus dubitus, Eleutherodactylus lutosus	Least Concern (LC)	EC,CO,PA,CR		Pristimantis cruentus	FALSE	FALSE	FALSE	TRUE	FALSE	TRUE	FALSE	FALSE	FALSE	FALSE	TRUE	Pristimantis cruentus (Peters, 1873)	1873
Anura	Strabomantidae	Pristimantinae	Pristimantis	muscosus	Pristimantis muscosus			Pristimantis muscosus	Eleutherodactylus muscosus	Eleutherodactylus muscosus	Data Deficient (DD)	EC,PE		Pristimantis muscosus	FALSE	FALSE	FALSE	TRUE	FALSE	TRUE	FALSE	FALSE	FALSE	FALSE	TRUE	Pristimantis muscosus (Duellman and Pramuk, 1999)	1999
Anura	Strabomantidae	Pristimantinae	Pristimantis	pharangobates	Pristimantis pharangobates						NA	PE		Pristimantis pharangobates	FALSE	FALSE	FALSE	TRUE	FALSE	TRUE	FALSE	FALSE	FALSE	FALSE	TRUE	Pristimantis pharangobates (Duellman, 1978)	1978
Anura	Strabomantidae	Pristimantinae	Pristimantis	sagittulus	Pristimantis sagittulus			Pristimantis sagittulus	Eleutherodactylus sagittulus	Eleutherodactylus sagittulus	Least Concern (LC)	PE		Pristimantis sagittulus	FALSE	FALSE	FALSE	TRUE	FALSE	TRUE	FALSE	FALSE	FALSE	FALSE	TRUE	Pristimantis sagittulus (Lehr, Aguilar, and Duellman, 2004)	2004
Anura	Odontophrynidae		Proceratophrys	boiei	Proceratophrys boiei		Boie's Frog, Rio de Janeiro's Smooth Horned Frog, sapo-de-chifre, sapo-folha, intanha-pequena.	Proceratophrys boiei	Proceratophrys fryi, Ceratophrys boiei, Ceratophrys fryi	Ceratophrys boiei, Ceratophrys fryi	Least Concern (LC)	BR		Proceratophrys boiei	FALSE	FALSE	FALSE	FALSE	FALSE	FALSE	FALSE	FALSE	FALSE	TRUE	TRUE	Proceratophrys boiei (Wied-Neuwied, 1824)	1824
Caudata	Proteidae	Proteinae	Proteus	anguinus	Proteus anguinus		Olm, Blind cave salamander, Grottenolm, hulepadde, koopaolm, Proteo, ProtÃÂ©e anguillard, hulesalamander, White Olm, Black Olm, odmieniec jaskiniowy, olmi, covecija ribica, cloveska ribica	Proteus anguinus			Vulnerable (VU)	SI,IT,FR,HR,BA		Proteus anguinus	FALSE	FALSE	FALSE	TRUE	FALSE	TRUE	FALSE	FALSE	FALSE	TRUE	TRUE	Proteus anguinus Laurenti, 1768	1768
Anura	Hylidae	Hylinae	Pseudacris	crucifer	Pseudacris crucifer		Spring Peeper, Southern Spring Peeper, Northern Spring Peeper	Pseudacris crucifer	Hyla crucifer, Hyla crucifer crucifer	Hyla crucifer, Hyla crucifer crucifer	Least Concern (LC)	CU,US,CA		Pseudacris crucifer	TRUE	FALSE	TRUE	TRUE	FALSE	TRUE	FALSE	FALSE	TRUE	FALSE	TRUE	Pseudacris crucifer (Wied-Neuwied, 1838)	1838
Anura	Hylidae	Hylinae	Pseudacris	streckeri	Pseudacris streckeri		Strecker's Chorus Frog	Pseudacris streckeri			Least Concern (LC)	US		Pseudacris streckeri	FALSE	FALSE	FALSE	TRUE	FALSE	TRUE	FALSE	FALSE	FALSE	FALSE	TRUE	Pseudacris streckeri Wright and Wright, 1933	1933
Anura	Pipidae		Pseudhymenochirus	merlini	Pseudhymenochirus merlini		Merlin's Clawed Frog	Pseudhymenochirus merlini			Least Concern (LC)	SL,GW,GN		Pseudhymenochirus merlini	FALSE	TRUE	TRUE	FALSE	FALSE	TRUE	FALSE	FALSE	FALSE	TRUE	TRUE	Pseudhymenochirus merlini Chabanaud, 1920	1920
Anura	Hylidae	Hylinae	Pseudis	paradoxa	Pseudis paradoxa		Paradox Frog, Paradoxical Frog	Pseudis paradoxa			Least Concern (LC)	PE,AR,BO,PY,BR,TT,VE,SR,GY,GF,CO		Pseudis paradoxa	TRUE	TRUE	TRUE	TRUE	FALSE	TRUE	FALSE	FALSE	TRUE	TRUE	TRUE	Pseudis paradoxa (Linnaeus, 1758)	1758
Caudata	Sirenidae		Pseudobranchus	striatus	Pseudobranchus striatus		Northern Dwarf Siren, Gulf Hammock Dwarf Siren, Slender Dwarf Siren, Borad-striped Dwarf Siren	Pseudobranchus striatus	Siren striata	Siren striata	Least Concern (LC)	US		Pseudobranchus striatus	TRUE	TRUE	TRUE	FALSE	FALSE	TRUE	FALSE	FALSE	FALSE	FALSE	TRUE	Pseudobranchus striatus (LeConte, 1824)	1824
Anura	Bufonidae		Pseudobufo	subasper	Pseudobufo subasper			Pseudobufo subasper			Least Concern (LC)	MY,ID		Pseudobufo subasper	FALSE	FALSE	FALSE	TRUE	FALSE	TRUE	FALSE	FALSE	FALSE	TRUE	TRUE	Pseudobufo subasper Tschudi, 1838	1838
Caudata	Hynobiidae	Hynobiinae	Pseudohynobius	shuichengensis	Pseudohynobius shuichengensis	Pseudohynobius		Pseudohynobius shuichengensis			Vulnerable (VU)	CN		Pseudohynobius shuichengensis	FALSE	FALSE	FALSE	FALSE	FALSE	FALSE	FALSE	FALSE	FALSE	TRUE	TRUE	Pseudohynobius shuichengensis Tian, Gu, Li, Sun, and Li, 1998	1998
Anura	Rhacophoridae	Rhacophorinae	Pseudophilautus	auratus	Pseudophilautus auratus			Pseudophilautus auratus			Endangered (EN)	LK		Pseudophilautus auratus	FALSE	TRUE	TRUE	FALSE	FALSE	TRUE	FALSE	FALSE	FALSE	FALSE	TRUE	Pseudophilautus auratus (Manamendra-Arachchi and Pethiyagoda, 2005)	2005
Anura	Myobatrachidae	Limnodynastinae	Pseudophryne	semimarmorata	Pseudophryne semimarmorata		Southern Toadlet	Pseudophryne semimarmorata			Least Concern (LC)	AU		Pseudophryne semimarmorata	FALSE	FALSE	FALSE	FALSE	FALSE	FALSE	FALSE	FALSE	TRUE	FALSE	TRUE	Pseudophryne semimarmorata Lucas, 1892	1892
Caudata	Plethodontidae	Hemidactyliinae	Pseudotriton	montanus	Pseudotriton montanus		Mud Salamander	Pseudotriton montanus			Least Concern (LC)	US		Pseudotriton montanus	FALSE	TRUE	TRUE	FALSE	FALSE	TRUE	FALSE	FALSE	FALSE	FALSE	TRUE	Pseudotriton montanus Baird, 1850	1850
Caudata	Plethodontidae	Hemidactyliinae	Pseudotriton	ruber	Pseudotriton ruber		Red Salamander	Pseudotriton ruber	Salamandra rubra	Salamandra rubra	Least Concern (LC)	US		Pseudotriton ruber	TRUE	TRUE	TRUE	TRUE	FALSE	TRUE	FALSE	FALSE	TRUE	FALSE	TRUE	Pseudotriton ruber (Sonnini de Manoncourt and Latreille, 1801)	1801
Anura	Strabomantidae	Holoadeninae	Psychrophrynella	usurpator	Psychrophrynella usurpator			Psychrophrynella usurpator			Endangered (EN)	PE		Psychrophrynella usurpator	FALSE	FALSE	FALSE	TRUE	FALSE	TRUE	FALSE	FALSE	FALSE	FALSE	TRUE	Psychrophrynella usurpator De la Riva, Chaparro, and Padial, 2008	2008
Anura	Ptychadenidae		Ptychadena	anchietae	Ptychadena anchietae		Anchieta's ridged frog	Ptychadena anchietae			Least Concern (LC)	AO,BW,CG,CD,DJ,ER,ET,KE,MW,MZ,NA,SO,ZA,SS,SZ,TZ,UG,ZM,ZW		Ptychadena anchietae	FALSE	FALSE	FALSE	TRUE	FALSE	TRUE	FALSE	FALSE	FALSE	FALSE	TRUE	Ptychadena anchietae (Bocage, 1868)	1868
Anura	Ptychadenidae		Ptychadena	christyi	Ptychadena christyi			Ptychadena christyi			Least Concern (LC)	CD		Ptychadena christyi	FALSE	FALSE	FALSE	TRUE	FALSE	TRUE	FALSE	FALSE	FALSE	FALSE	TRUE	Ptychadena christyi (Boulenger, 1919)	1919
Anura	Ptychadenidae		Ptychadena	erlangeri	Ptychadena erlangeri			Ptychadena erlangeri			Near Threatened (NT)	ET		Ptychadena erlangeri	FALSE	FALSE	FALSE	TRUE	FALSE	TRUE	FALSE	FALSE	FALSE	FALSE	TRUE	Ptychadena erlangeri (Ahl, 1924)	1924
Anura	Ptychadenidae		Ptychadena	mascareniensis	Ptychadena mascareniensis		Mascarene ridged frog	Ptychadena mascareniensis			Least Concern (LC)	CM,CF,CD,EG,ER,ET,GA,GH,GN,GW,KE,LR,MG,MW,MR,MZ,NA,NG,RW,SN,SC,SL,ZA,SS,TZ,ZM,ZW		Ptychadena mascareniensis	FALSE	FALSE	FALSE	TRUE	FALSE	TRUE	FALSE	FALSE	TRUE	TRUE	TRUE	Ptychadena mascareniensis (Duméril and Bibron, 1841)	1841
Anura	Ptychadenidae		Ptychadena	neumanni	Ptychadena neumanni			Ptychadena neumanni			Least Concern (LC)	ET		Ptychadena neumanni	FALSE	FALSE	FALSE	TRUE	FALSE	TRUE	FALSE	FALSE	FALSE	FALSE	TRUE	Ptychadena neumanni (Ahl, 1924)	1924
Anura	Ptychadenidae		Ptychadena	oxyrhynchus	Ptychadena oxyrhynchus		Sharp-nosed ridged frog	Ptychadena oxyrhynchus			Least Concern (LC)	AO,BJ,BW,CM,CF,TD,CG,CD,ER,GM,GH,GN,GW,KE,LR,MW,ML,MZ,NA,NG,SN,SL,SO,ZA,SS,TZ,TG,UG,ZM,ZW		Ptychadena oxyrhynchus	FALSE	FALSE	FALSE	TRUE	FALSE	TRUE	FALSE	FALSE	FALSE	FALSE	TRUE	Ptychadena oxyrhynchus (Smith, 1849)	1849
Anura	Ptychadenidae		Ptychadena	superciliaris	Ptychadena superciliaris			Ptychadena superciliaris			Near Threatened (NT)	GH,SN,SL		Ptychadena superciliaris	FALSE	FALSE	FALSE	FALSE	FALSE	FALSE	FALSE	FALSE	FALSE	TRUE	TRUE	Ptychadena superciliaris (Günther, 1858)	1858
Anura	Hylidae	Hylinae	Ptychohyla	hypomykter	Ptychohyla hypomykter			Ptychohyla hypomykter			Least Concern (LC)	NI,HN,GT		Ptychohyla hypomykter	FALSE	FALSE	FALSE	TRUE	FALSE	TRUE	FALSE	FALSE	FALSE	FALSE	TRUE	Ptychohyla hypomykter McCranie and Wilson, 1993	1993
Anura	Ranidae		Pulchrana	picturata	Pulchrana picturata			Pulchrana picturata	Rana picturata	Rana picturata, Pulchrana picturata	Least Concern (LC)	MY,ID,BN		Pulchrana picturata	FALSE	TRUE	TRUE	FALSE	FALSE	TRUE	FALSE	FALSE	FALSE	FALSE	TRUE	Pulchrana picturata (Boulenger, 1920)	1920
Anura	Ranidae		Pulchrana	signata	Pulchrana signata			Pulchrana signata	Rana signata, Rana obsoleta	Rana signata, Rana obsoleta, Pulchrana signata	Least Concern (LC)	ID,TH,MY		Pulchrana signata	TRUE	TRUE	TRUE	FALSE	FALSE	TRUE	FALSE	FALSE	FALSE	FALSE	TRUE	Pulchrana signata (Günther, 1872)	1872
Anura	Pyxicephalidae	Pyxicephalinae	Pyxicephalus	adspersus	Pyxicephalus adspersus		African bullfrog, Giant bullfrog, South African Burrowing Frog	Pyxicephalus adspersus			Least Concern (LC)	AO,BW,NA,ZA,SZ,ZM,ZW		Pyxicephalus adspersus	TRUE	TRUE	TRUE	TRUE	FALSE	TRUE	FALSE	FALSE	TRUE	TRUE	TRUE	Pyxicephalus adspersus Tschudi, 1838	1838
Anura	Pyxicephalidae	Pyxicephalinae	Pyxicephalus	angusticeps	Pyxicephalus angusticeps			Pyxicephalus angusticeps			Least Concern (LC)	DZ,KE,MW,MZ,TZ		Pyxicephalus angusticeps	FALSE	TRUE	TRUE	FALSE	FALSE	TRUE	FALSE	FALSE	FALSE	TRUE	TRUE	Pyxicephalus angusticeps Parry, 1982	1982
Anura	Pyxicephalidae	Pyxicephalinae	Pyxicephalus	edulis	Pyxicephalus edulis		Edible bullfrog	Pyxicephalus edulis			Least Concern (LC)	AO,BJ,BW,BF,TD,KE,MW,ML,MR,MZ,NG,TZ,ZM,ZW		Pyxicephalus edulis	TRUE	TRUE	TRUE	TRUE	FALSE	TRUE	FALSE	FALSE	TRUE	TRUE	TRUE	Pyxicephalus edulis Peters, 1854	1854
Anura	Dicroglossidae	Dicroglossinae	Quasipaa	boulengeri	Quasipaa boulengeri			Quasipaa boulengeri	Paa boulengeri, Paa robertingeri, Rana tibetana	Paa boulengeri, Paa robertingeri, Rana tibetana	Endangered (EN)	CN		Quasipaa boulengeri	FALSE	FALSE	FALSE	FALSE	FALSE	FALSE	FALSE	FALSE	FALSE	TRUE	TRUE	Quasipaa boulengeri (Günther, 1889)	1889
Anura	Dicroglossidae	Dicroglossinae	Quasipaa	courtoisi	Quasipaa courtoisi				Paa spinosa, Rana spinosa, Rana duboisreymondi	Paa spinosa, Rana spinosa, Rana duboisreymondi	NA	CN		Quasipaa courtoisi	FALSE	TRUE	TRUE	FALSE	FALSE	TRUE	FALSE	FALSE	FALSE	FALSE	TRUE	Quasipaa courtoisi (Angel, 1922)	1922
Anura	Dicroglossidae	Dicroglossinae	Quasipaa	delacouri	Quasipaa delacouri		Doi Chang Asian Frog, Tonkin Asian Frog		Quasipaa delacouri, Annandia delacouri, Chaparana delacouri, Rana microlineata, Paa microlineata	Chaparana delacouri, Rana microlineata, Paa microlineata	Data Deficient (DD)	LA,VN		Quasipaa delacouri	FALSE	FALSE	FALSE	FALSE	FALSE	FALSE	FALSE	FALSE	FALSE	TRUE	TRUE	Quasipaa delacouri (Angel, 1928)	1928
Anura	Dicroglossidae	Dicroglossinae	Quasipaa	exilispinosa	Quasipaa exilispinosa			Quasipaa exilispinosa	Paa exilispinosa, Rana exilispinosa, Nanorana exilispinosa	Paa exilispinosa, Rana exilispinosa, Nanorana exilispinosa	Vulnerable (VU)	HK,CN		Quasipaa exilispinosa	FALSE	FALSE	FALSE	FALSE	FALSE	FALSE	FALSE	FALSE	FALSE	TRUE	TRUE	Quasipaa exilispinosa (Liu and Hu, 1975)	1975
Anura	Dicroglossidae	Dicroglossinae	Quasipaa	fasciculispina	Quasipaa fasciculispina			Quasipaa fasciculispina	Paa fasciculispina, Rana fasciculispina, Nanorana fasciculispina	Paa fasciculispina, Rana fasciculispina, Nanorana fasciculispina	Vulnerable (VU)	KH,TH		Quasipaa fasciculispina	FALSE	FALSE	FALSE	FALSE	FALSE	FALSE	FALSE	FALSE	FALSE	TRUE	TRUE	Quasipaa fasciculispina (Inger, 1970)	1970
Anura	Dicroglossidae	Dicroglossinae	Quasipaa	jiulongensis	Quasipaa jiulongensis			Quasipaa jiulongensis	Nanorana jiulongensis, Paa jiulongensis, Rana jiulongensis	Paa jiulongensis, Rana jiulongensis, Nanorana jiulongensis	Vulnerable (VU)	CN		Quasipaa jiulongensis	FALSE	FALSE	FALSE	FALSE	FALSE	FALSE	FALSE	FALSE	FALSE	TRUE	TRUE	Quasipaa jiulongensis (Huang and Liu, 1985)	1985
Anura	Dicroglossidae	Dicroglossinae	Quasipaa	shini	Quasipaa shini			Quasipaa shini	Paa shini, Rana shini, Nanorana shini	Paa shini, Rana shini, Nanorana shini	Vulnerable (VU)	CN		Quasipaa shini	FALSE	FALSE	FALSE	FALSE	FALSE	FALSE	FALSE	FALSE	FALSE	TRUE	TRUE	Quasipaa shini (Ahl, 1930)	1930
Anura	Dicroglossidae	Dicroglossinae	Quasipaa	spinosa	Quasipaa spinosa			Quasipaa spinosa	Paa spinosa, Rana spinosa, Rana duboisreymondi	Paa spinosa, Rana spinosa, Rana duboisreymondi	Vulnerable (VU)	CN,HK,VN		Quasipaa spinosa	FALSE	TRUE	TRUE	FALSE	FALSE	TRUE	FALSE	FALSE	FALSE	TRUE	TRUE	Quasipaa spinosa (David, 1875)	1875
Anura	Dicroglossidae	Dicroglossinae	Quasipaa	verrucospinosa	Quasipaa verrucospinosa			Quasipaa verrucospinosa	Paa verrucospinosa	Paa verrucospinosa	Near Threatened (NT)	CN,LA,VN		Quasipaa verrucospinosa	FALSE	FALSE	FALSE	FALSE	FALSE	FALSE	FALSE	FALSE	FALSE	TRUE	TRUE	Quasipaa verrucospinosa (Bourret, 1937)	1937
Anura	Dicroglossidae	Dicroglossinae	Quasipaa	yei	Quasipaa yei			Quasipaa yei	Paa yei, Nanorana yei, Yerana yei	Paa yei, Nanorana yei, Yerana yei	Data Deficient (DD)	CN		Quasipaa yei	FALSE	FALSE	FALSE	FALSE	FALSE	FALSE	FALSE	FALSE	FALSE	TRUE	TRUE	Quasipaa yei (Chen, Qu, and Jiang, 2002)	2002
Anura	Ranidae		Rana	amurensis	Rana amurensis	Rana	Siberian Wood Frog	Rana amurensis			Least Concern (LC)	CN,KZ,KP,KG,MN,RU		Rana amurensis	FALSE	FALSE	FALSE	FALSE	FALSE	FALSE	FALSE	FALSE	FALSE	TRUE	TRUE	Rana amurensis Boulenger, 1886	1886
Anura	Ranidae		Rana	arvalis	Rana arvalis	Rana	Moor Frog	Rana arvalis			Least Concern (LC)	AT,BY,BE,CN,CZ,DK,EE,FI,FR,DE,HU,IT,KZ,LV,LT,MD,NL,NO,PL,RO,RU,SK,SI,SE,CH,UA		Rana arvalis	FALSE	FALSE	FALSE	FALSE	FALSE	FALSE	FALSE	FALSE	FALSE	TRUE	TRUE	Rana arvalis Nilsson, 1842	1842
Anura	Ranidae		Rana	aurora	Rana aurora	Amerana	Red-legged Frog, Northern Red-legged Frog	Rana aurora	Rana agilis aurora	Rana agilis aurora	Least Concern (LC)	US,MX,CA		Rana aurora	FALSE	FALSE	FALSE	TRUE	FALSE	TRUE	FALSE	FALSE	FALSE	FALSE	TRUE	Rana aurora Baird and Girard, 1852	1852
Anura	Ranidae		Rana	berlandieri	Rana berlandieri	Pantherana	Rio Grande Leopard Frog	Lithobates berlandieri	Lithobates berlandieri, Rana halecina berlandieri	Rana halecina berlandieri, Lithobates berlandieri	Least Concern (LC)	BZ,MX,NI,US	This species was placed in the genus Lithobates by Frost et al. (2006). However, Yuan et al. (2016, Systematic Biology, doi: 10.1093/sysbio/syw055) showed that this action created problems of paraphyly in other genera. Yuan et al. (2016) recognized su	Rana berlandieri	FALSE	FALSE	FALSE	TRUE	FALSE	TRUE	FALSE	FALSE	TRUE	TRUE	TRUE	Lithobates berlandieri (Baird, 1859)	1859
Anura	Ranidae		Rana	capito	Rana capito	Pantherana	Carolina Gopher Frog	Lithobates capito	Lithobates capito	Lithobates capito	Near Threatened (NT)	US	This species was placed in the genus Lithobates by Frost et al. (2006). However, Yuan et al. (2016, Systematic Biology, doi: 10.1093/sysbio/syw055) showed that this action created problems of paraphyly in other genera. Yuan et al. (2016) recognized su	Rana capito	FALSE	FALSE	FALSE	TRUE	FALSE	TRUE	FALSE	FALSE	FALSE	FALSE	TRUE	Lithobates capito (LeConte, 1855)	1855
Anura	Ranidae		Rana	catesbeiana	Rana catesbeiana	Aquarana	Bullfrog, American Bullfrog	Lithobates catesbeianus	Lithobates catesbeianus	Lithobates catesbeianus	Least Concern (LC)	AR,BE,BR,CA,CN,CO,CU,DO,EC,FR,DE,GR,HT,ID,IT,JM,JP,MY,MX,PE,PH,PR,SG,ES,TW,TH,US,UY,VE	This species was placed in the genus Lithobates by Frost et al. (2006). However, Yuan et al. (2016, Systematic Biology, doi: 10.1093/sysbio/syw055) showed that this action created problems of paraphyly in other genera. Yuan et al. (2016) recognized subge	Rana catesbeiana	TRUE	TRUE	TRUE	TRUE	TRUE	TRUE	FALSE	FALSE	TRUE	TRUE	TRUE	Lithobates catesbeianus (Shaw, 1802)	1802
Anura	Ranidae		Rana	chensinensis	Rana chensinensis	Rana	Chinese Brown Frog	Rana chensinensis			Least Concern (LC)	CN,KP,MN,RU		Rana chensinensis	FALSE	FALSE	FALSE	TRUE	FALSE	TRUE	FALSE	FALSE	TRUE	TRUE	TRUE	Rana chensinensis David, 1875	1875
Anura	Ranidae		Rana	chiricahuensis	Rana chiricahuensis	Pantherana	Chiricahua Leopard Frog	Lithobates chiricahuensis	Lithobates chiricahuensis, Rana subaquavocalis	Rana subaquavocalis, Lithobates chiricahuensis	Vulnerable (VU)	US,MX	In 2011 Hekkala, Saumure, Jaeger, Herrmann, Sredl, Bradford, Drabeck and Blum, in an open access article published in Conservation Genetics (DOI 10.1007/s10592-011-0229-6), showed that Rana chiricahuensis, as treated in the following species ac	Rana chiricahuensis	FALSE	FALSE	FALSE	TRUE	FALSE	TRUE	FALSE	FALSE	FALSE	FALSE	TRUE	Lithobates chiricahuensis (Platz and Mecham, 1979)	1979
Anura	Ranidae		Rana	clamitans	Rana clamitans	Aquarana	Bronze Frog, Green Frog (<i>R. c. melanotus</i>), Bronze Frog (<i>R. c. clamitans</i>)	Lithobates clamitans	Lithobates clamitans, Lithobates clamitans clamitans	Lithobates clamitans clamitans	Least Concern (LC)	US,CA	This species was placed in the genus Lithobates by Frost et al. (2006). However, Yuan et al. (2016, Systematic Biology, doi: 10.1093/sysbio/syw055) showed that this action created problems of paraphyly in other genera. Yuan et al. (2016) recognized su	Rana clamitans	TRUE	FALSE	TRUE	TRUE	FALSE	TRUE	FALSE	FALSE	TRUE	FALSE	TRUE	Lithobates clamitans (Latreille, 1801)	1801
Anura	Ranidae		Rana	dunni	Rana dunni	Pantherana		Lithobates dunni	Lithobates dunni	Lithobates dunni	Endangered (EN)	MX	This species was placed in the genus Lithobates by Frost et al. (2006). However, Yuan et al. (2016, Systematic Biology, doi: 10.1093/sysbio/syw055) showed that this action created problems of paraphyly in other genera. Yuan et al. (2016) recognized su	Rana dunni	FALSE	FALSE	FALSE	FALSE	FALSE	FALSE	FALSE	FALSE	FALSE	TRUE	TRUE	Lithobates dunni (Zweifel, 1957)	1957
Anura	Ranidae		Rana	dybowskii	Rana dybowskii	Rana	Dybovsky's Frog	Rana dybowskii			Least Concern (LC)	CN,JP,KP,RU		Rana dybowskii	FALSE	FALSE	FALSE	FALSE	FALSE	FALSE	FALSE	FALSE	FALSE	TRUE	TRUE	Rana dybowskii Günther, 1876	1876
Anura	Ranidae		Rana	forreri	Rana forreri	Pantherana	Forrer's Grass Frog	Lithobates forreri	Lithobates forreri	Lithobates forreri	Least Concern (LC)	CR,HN,MX,NI	This species was placed in the genus Lithobates by Frost et al. (2006). However, Yuan et al. (2016, Systematic Biology, doi: 10.1093/sysbio/syw055) showed that this action created problems of paraphyly in other genera. Yuan et al. (2016) recognized su	Rana forreri	FALSE	FALSE	FALSE	TRUE	FALSE	TRUE	FALSE	FALSE	TRUE	TRUE	TRUE	Lithobates forreri (Boulenger, 1883)	1883
Anura	Ranidae		Rana	grylio	Rana grylio	Aquarana	Pig Frog, American Pigfrog	Lithobates grylio	Lithobates grylio	Lithobates grylio	Least Concern (LC)	BS,CN,PR,US	This species was placed in the genus Lithobates by Frost et al. (2006). However, Yuan et al. (2016, Systematic Biology, doi: 10.1093/sysbio/syw055) showed that this action created problems of paraphyly in other genera. Yuan et al. (2016) recognized su	Rana grylio	FALSE	TRUE	TRUE	TRUE	FALSE	TRUE	FALSE	FALSE	FALSE	TRUE	TRUE	Lithobates grylio (Stejneger, 1901)	1901
Anura	Ranidae		Rana	heckscheri	Rana heckscheri	Aquarana	River Frog	Lithobates heckscheri	Lithobates heckscheri	Lithobates heckscheri	Least Concern (LC)	CN,US	This species was placed in the genus Lithobates by Frost et al. (2006). However, Yuan et al. (2016, Systematic Biology, doi: 10.1093/sysbio/syw055) showed that this action created problems of paraphyly in other genera. Yuan et al. (2016) recognized su	Rana heckscheri	FALSE	TRUE	TRUE	FALSE	FALSE	TRUE	FALSE	FALSE	FALSE	FALSE	TRUE	Lithobates heckscheri (Wright, 1924)	1924
Anura	Ranidae		Rana	huanrensis	Rana huanrensis	Rana	Huanren Frog, Korean Stream Brown Frog	Rana huanrensis	Rana huanrenensis	Rana huanrenensis	Least Concern (LC)	CN,KP,KR		Rana huanrensis	FALSE	FALSE	FALSE	FALSE	FALSE	FALSE	FALSE	FALSE	FALSE	TRUE	TRUE	Rana huanrenensis Fei, Ye, and Huang, 1990	1990
Anura	Ranidae		Rana	latastei	Rana latastei	Rana		Rana latastei			Vulnerable (VU)	HR,SI,CH,IT		Rana latastei	FALSE	FALSE	FALSE	TRUE	FALSE	TRUE	FALSE	FALSE	FALSE	FALSE	TRUE	Rana latastei Boulenger, 1879	1879
Anura	Ranidae		Rana	luanchuanensis	Rana luanchuanensis						NA	CN		Rana luanchuanensis	FALSE	FALSE	FALSE	FALSE	FALSE	FALSE	FALSE	FALSE	FALSE	TRUE	TRUE	Rana luanchuanensis Zhao and Yuan, 2017	2017
Anura	Ranidae		Rana	magnaocularis	Rana magnaocularis	Pantherana		Lithobates magnaocularis	Lithobates magnaocularis	Lithobates magnaocularis	Least Concern (LC)	MX	This species was placed in the genus Lithobates by Frost et al. (2006). However, Yuan et al. (2016, Systematic Biology, doi: 10.1093/sysbio/syw055) showed that this action created problems of paraphyly in other genera. Yuan et al. (2016) recognized su	Rana magnaocularis	FALSE	FALSE	FALSE	TRUE	FALSE	TRUE	FALSE	FALSE	FALSE	FALSE	TRUE	Lithobates magnaocularis (Frost and Bagnara, 1974)	1974
Anura	Ranidae		Rana	megapoda	Rana megapoda	Pantherana		Lithobates megapoda	Lithobates megapoda, Rana trilobata	Rana trilobata, Lithobates megapoda	Vulnerable (VU)	MX	This species was placed in the genus Lithobates by Frost et al. (2006). However, Yuan et al. (2016, Systematic Biology, doi: 10.1093/sysbio/syw055) showed that this action created problems of paraphyly in other genera. Yuan et al. (2016) recognized su	Rana megapoda	FALSE	FALSE	FALSE	FALSE	FALSE	FALSE	FALSE	FALSE	FALSE	TRUE	TRUE	Lithobates megapoda (Taylor, 1942)	1942
Anura	Ranidae		Rana	montezumae	Rana montezumae	Pantherana		Lithobates montezumae	Lithobates montezumae	Lithobates montezumae	Least Concern (LC)	MX	This species was placed in the genus Lithobates by Frost et al. (2006). However, Yuan et al. (2016, Systematic Biology, doi: 10.1093/sysbio/syw055) showed that this action created problems of paraphyly in other genera. Yuan et al. (2016) recognized su	Rana montezumae	FALSE	FALSE	FALSE	FALSE	FALSE	FALSE	FALSE	FALSE	FALSE	TRUE	TRUE	Lithobates montezumae (Baird, 1854)	1854
Anura	Ranidae		Rana	palustris	Rana palustris	Pantherana	Pickerel Frog	Lithobates palustris	Lithobates palustris	Lithobates palustris	Least Concern (LC)	US,CA	This species was placed in the genus Lithobates by Frost et al. (2006). However, Yuan et al. (2016, Systematic Biology, doi: 10.1093/sysbio/syw055) showed that this action created problems of paraphyly in other genera. Yuan et al. (2016) recognized su	Rana palustris	FALSE	FALSE	FALSE	TRUE	FALSE	TRUE	FALSE	FALSE	FALSE	FALSE	TRUE	Lithobates palustris (LeConte, 1825)	1825
Anura	Ranidae		Rana	pipiens	Rana pipiens	Pantherana	Northern Leopard Frog	Lithobates pipiens	Lithobates pipiens	Lithobates pipiens	Least Concern (LC)	US,CA	This species was placed in the genus Lithobates by Frost et al. (2006). However, Yuan et al. (2016, Systematic Biology, doi: 10.1093/sysbio/syw055) showed that this action created problems of paraphyly in other genera. Yuan et al. (2016) recognized subge	Rana pipiens	TRUE	TRUE	TRUE	TRUE	FALSE	TRUE	FALSE	FALSE	TRUE	FALSE	TRUE	Lithobates pipiens (Schreber, 1782)	1782
Anura	Ranidae		Rana	psilonota	Rana psilonota	Zweifelia		Lithobates psilonota	Lithobates psilonota	Lithobates psilonota	Data Deficient (DD)	MX	This species was placed in the genus Lithobates by Frost et al. (2006). However, Yuan et al. (2016, Systematic Biology, doi: 10.1093/sysbio/syw055) showed that this action created problems of paraphyly in other genera. Yuan et al. (2016) recognized su	Rana psilonota	FALSE	FALSE	FALSE	FALSE	FALSE	FALSE	FALSE	FALSE	FALSE	TRUE	TRUE	Lithobates psilonota (Webb, 2001)	2001
Anura	Ranidae		Rana	spectabilis	Rana spectabilis	Pantherana		Lithobates spectabilis	Lithobates spectabilis	Lithobates spectabilis	Least Concern (LC)	MX	This species was placed in the genus Lithobates by Frost et al. (2006). However, Yuan et al. (2016, Systematic Biology, doi: 10.1093/sysbio/syw055) showed that this action created problems of paraphyly in other genera. Yuan et al. (2016) recognized su	Rana spectabilis	FALSE	FALSE	FALSE	FALSE	FALSE	FALSE	FALSE	FALSE	FALSE	TRUE	TRUE	Lithobates spectabilis (Hillis and Frost, 1985)	1985
Anura	Ranidae		Rana	sphenocephala	Rana sphenocephala	Pantherana	Southern Leopard Frog (<i>R. s. sphenocephala</i>), Florida Leopard Frog (<i>R. s. utricularius</i>)	Lithobates sphenocephalus	Lithobates sphenocephalus, Rana utricularia sphenocephala, Rana halecina sphenocephala, Lithobates sphenocephalus sphenocephalus	Rana utricularia sphenocephala, Rana halecina sphenocephala, Lithobates sphenocephalus sphenocephalus	Least Concern (LC)	US	This species was placed in the genus Lithobates by Frost et al. (2006). However, Yuan et al. (2016, Systematic Biology, doi: 10.1093/sysbio/syw055) showed that this action created problems of paraphyly in other genera. Yuan et al. (2016) recognized su	Rana sphenocephala	TRUE	FALSE	TRUE	FALSE	FALSE	TRUE	FALSE	FALSE	TRUE	FALSE	TRUE	Lithobates sphenocephalus (Cope, 1886)	1886
Anura	Ranidae		Rana	sylvatica	Rana sylvatica		Wood Frog	Lithobates sylvaticus	Lithobates sylvatica, Lithobates sylvaticus	Lithobates sylvaticus	Least Concern (LC)	US,CA	This species was placed in the genus Lithobates by Frost et al. (2006). However, Yuan et al. (2016, Systematic Biology, doi: 10.1093/sysbio/syw055) showed that this action created problems of paraphyly in other genera. Yuan et al. (2016) recognized subge	Rana sylvatica	FALSE	FALSE	FALSE	TRUE	FALSE	TRUE	FALSE	FALSE	TRUE	FALSE	TRUE	Lithobates sylvaticus (LeConte, 1825)	1825
Anura	Ranidae		Rana	tarahumarae	Rana tarahumarae	Zweifelia	Tarahumara Frog	Lithobates tarahumarae	Lithobates tarahumarae	Lithobates tarahumarae	Vulnerable (VU)	US,MX	This species was placed in the genus Lithobates by Frost et al. (2006). However, Yuan et al. (2016, Systematic Biology, doi: 10.1093/sysbio/syw055) showed that this action created problems of paraphyly in other genera. Yuan et al. (2016) recognized su	Rana tarahumarae	FALSE	FALSE	FALSE	TRUE	FALSE	TRUE	FALSE	FALSE	FALSE	FALSE	TRUE	Lithobates tarahumarae (Boulenger, 1917)	1917
Anura	Ranidae		Rana	temporaria	Rana temporaria	Rana	Common Frog	Rana temporaria	Rana honnorati	Rana honnorati	Least Concern (LC)	AT,BY,BE,BG,CZ,DK,EE,FI,FR,DE,HU,IE,IT,LV,LI,LT,LU,MK,ME,NL,NO,PL,RO,RU,RS,SK,SI,ES,SE,CH,UA,GB		Rana temporaria	FALSE	FALSE	FALSE	TRUE	FALSE	TRUE	FALSE	FALSE	TRUE	TRUE	TRUE	Rana temporaria Linnaeus, 1758	1758
Anura	Ranidae		Rana	vibicaria	Rana vibicaria	Lithobates	Green-eyed Frog	Lithobates vibicarius	Lithobates vibicarius	Lithobates vibicarius	Vulnerable (VU)	PA,CR	This species was placed in the genus Lithobates by Frost et al. (2006). However, Yuan et al. (2016, Systematic Biology, doi: 10.1093/sysbio/syw055) showed that this action created problems of paraphyly in other genera. Yuan et al. (2016) recognized subge	Rana vibicaria	FALSE	TRUE	TRUE	FALSE	FALSE	TRUE	FALSE	FALSE	FALSE	FALSE	TRUE	Lithobates vibicarius (Cope, 1894)	1894
Anura	Ranidae		Rana	warszewitschii	Rana warszewitschii	Lithobates	Warszewitsch's Frog	Lithobates warszewitschii	Lithobates warszewitschii	Lithobates warszewitschii	Least Concern (LC)	PA,CR,NI,HN	This species was placed in the genus Lithobates by Frost et al. (2006). However, Yuan et al. (2016, Systematic Biology, doi: 10.1093/sysbio/syw055) showed that this action created problems of paraphyly in other genera. Yuan et al. (2016) recognized su	Rana warszewitschii	FALSE	FALSE	FALSE	TRUE	FALSE	TRUE	FALSE	FALSE	FALSE	FALSE	TRUE	Lithobates warszewitschii (Schmidt, 1857)	1857
Anura	Ranidae		Rana	yavapaiensis	Rana yavapaiensis	Pantherana	Lowland Leopard Frog	Lithobates yavapaiensis	Lithobates yavapaiensis	Lithobates yavapaiensis	Least Concern (LC)	MX,US	This species was placed in the genus Lithobates by Frost et al. (2006). However, Yuan et al. (2016, Systematic Biology, doi: 10.1093/sysbio/syw055) showed that this action created problems of paraphyly in other genera. Yuan et al. (2016) recognized su	Rana yavapaiensis	FALSE	FALSE	FALSE	TRUE	FALSE	TRUE	FALSE	FALSE	FALSE	FALSE	TRUE	Lithobates yavapaiensis (Platz and Frost, 1984)	1984
Anura	Dendrobatidae	Dendrobatinae	Ranitomeya	amazonica	Ranitomeya amazonica			Ranitomeya amazonica	Dendrobates amazonicus	Dendrobates amazonicus	Data Deficient (DD)	PE		Ranitomeya amazonica	TRUE	TRUE	TRUE	TRUE	TRUE	TRUE	TRUE	II	TRUE	TRUE	TRUE	Ranitomeya amazonica (Schulte, 1999)	1999
Anura	Dendrobatidae	Dendrobatinae	Ranitomeya	benedicta	Ranitomeya benedicta			Ranitomeya benedicta			Vulnerable (VU)	PE		Ranitomeya benedicta	TRUE	TRUE	TRUE	FALSE	TRUE	TRUE	TRUE	II	TRUE	TRUE	TRUE	Ranitomeya benedicta Brown, Twomey, Pepper, and Sanchez-Rodriguez, 2008	2008
Anura	Dendrobatidae	Dendrobatinae	Ranitomeya	cyanovittata	Ranitomeya cyanovittata				Dendrobates cyanovittata		NA	PE		Ranitomeya cyanovittata	FALSE	FALSE	FALSE	FALSE	TRUE	TRUE	TRUE	II	FALSE	FALSE	TRUE	Ranitomeya cyanovittata Pérez-Peña, Chávez, Twomey, and Brown, 2010	2010
Anura	Dendrobatidae	Dendrobatinae	Ranitomeya	defleri	Ranitomeya defleri			Ranitomeya defleri			Least Concern (LC)	CO		Ranitomeya defleri	FALSE	FALSE	FALSE	FALSE	TRUE	TRUE	TRUE	II	FALSE	FALSE	TRUE	Ranitomeya defleri Twomey and Brown, 2009	2009
Anura	Dendrobatidae	Dendrobatinae	Ranitomeya	fantastica	Ranitomeya fantastica		Crowned Poison Frog, Red-headed Poison Frog	Ranitomeya fantastica	Dendrobates fantasticus	Dendrobates fantasticus	Near Threatened (NT)	PE		Ranitomeya fantastica	TRUE	TRUE	TRUE	TRUE	TRUE	TRUE	TRUE	II	TRUE	TRUE	TRUE	Ranitomeya fantastica (Boulenger, 1884)	1884
Anura	Dendrobatidae	Dendrobatinae	Ranitomeya	flavovittata	Ranitomeya flavovittata			Ranitomeya flavovittata	Dendrobates flavovittatus	Dendrobates flavovittatus	Least Concern (LC)	PE		Ranitomeya flavovittata	TRUE	TRUE	TRUE	TRUE	TRUE	TRUE	TRUE	II	TRUE	TRUE	TRUE	Ranitomeya flavovittata (Schulte, 1999)	1999
Anura	Dendrobatidae	Dendrobatinae	Ranitomeya	imitator	Ranitomeya imitator		Imitating Poison Frog, Mimic Poison Frog, Rana Venenosa	Ranitomeya imitator	Dendrobates imitator	Dendrobates imitator	Least Concern (LC)	PE		Ranitomeya imitator	TRUE	TRUE	TRUE	TRUE	TRUE	TRUE	TRUE	II	TRUE	TRUE	TRUE	Ranitomeya imitator (Schulte, 1986)	1986
Anura	Dendrobatidae	Dendrobatinae	Ranitomeya	reticulata	Ranitomeya reticulata		Red-backed Poison Frog, Reticulated Poison Frog	Ranitomeya reticulata	Dendrobates reticulatus	Dendrobates reticulatus	Least Concern (LC)	EC,PE		Ranitomeya reticulata	TRUE	TRUE	TRUE	TRUE	TRUE	TRUE	TRUE	II	TRUE	TRUE	TRUE	Ranitomeya reticulata (Boulenger, 1884)	1884
Anura	Dendrobatidae	Dendrobatinae	Ranitomeya	sirensis	Ranitomeya sirensis			Ranitomeya sirensis	Dendrobates sirensis	Dendrobates sirensis	Least Concern (LC)	PE		Ranitomeya sirensis	TRUE	TRUE	TRUE	TRUE	TRUE	TRUE	TRUE	II	TRUE	TRUE	TRUE	Ranitomeya sirensis (Aichinger, 1991)	1991
Anura	Dendrobatidae	Dendrobatinae	Ranitomeya	summersi	Ranitomeya summersi			Ranitomeya summersi			Endangered (EN)	PE		Ranitomeya summersi	TRUE	TRUE	TRUE	FALSE	TRUE	TRUE	TRUE	II	TRUE	TRUE	TRUE	Ranitomeya summersi Brown, Twomey, Pepper, and Sanchez-Rodriguez, 2008	2008
Anura	Dendrobatidae	Dendrobatinae	Ranitomeya	toraro	Ranitomeya toraro						NA	BR		Ranitomeya toraro	FALSE	FALSE	FALSE	FALSE	TRUE	TRUE	TRUE	II	FALSE	FALSE	TRUE	Ranitomeya toraro Brown, Caldwell, Twomey, Melo-Sampaio, and Souza, 2011	2011
Anura	Dendrobatidae	Dendrobatinae	Ranitomeya	uakarii	Ranitomeya uakarii			Ranitomeya uakarii			Least Concern (LC)	PE		Ranitomeya uakarii	TRUE	TRUE	TRUE	FALSE	TRUE	TRUE	TRUE	II	TRUE	TRUE	TRUE	Ranitomeya uakarii (Brown, Schulte, and Summers, 2006)	2006
Anura	Dendrobatidae	Dendrobatinae	Ranitomeya	vanzolinii	Ranitomeya vanzolinii		Spotted Poison Frog	Ranitomeya vanzolinii	Dendrobates vanzolinii	Dendrobates vanzolinii	Least Concern (LC)	PE,BR		Ranitomeya vanzolinii	TRUE	TRUE	TRUE	TRUE	TRUE	TRUE	TRUE	II	TRUE	TRUE	TRUE	Ranitomeya vanzolinii (Myers, 1982)	1982
Anura	Dendrobatidae	Dendrobatinae	Ranitomeya	variabilis	Ranitomeya variabilis		Variable Poison Frog, Splash-back Poison Frog	Ranitomeya variabilis	Dendrobates variabilis	Dendrobates variabilis	Data Deficient (DD)	CO,EC,PE		Ranitomeya variabilis	TRUE	TRUE	TRUE	TRUE	TRUE	TRUE	TRUE	II	TRUE	TRUE	TRUE	Ranitomeya variabilis (Zimmermann and Zimmermann, 1988)	1988
Anura	Dendrobatidae	Dendrobatinae	Ranitomeya	ventrimaculata	Ranitomeya ventrimaculata			Ranitomeya ventrimaculata	Dendrobates ventrimaculatus, Dendrobates minutus ventrimaculatus	Dendrobates ventrimaculatus, Dendrobates minutus ventrimaculatus	Least Concern (LC)	BR,CO,EC,GF,GY,PE,SR		Ranitomeya ventrimaculata	TRUE	TRUE	TRUE	TRUE	TRUE	TRUE	TRUE	II	TRUE	TRUE	TRUE	Ranitomeya ventrimaculata (Shreve, 1935)	1935
Anura	Dendrobatidae	Dendrobatinae	Ranitomeya	yavaricola	Ranitomeya yavaricola				Dendrobates yavaricola		NA	PE		Ranitomeya yavaricola	FALSE	FALSE	FALSE	FALSE	TRUE	TRUE	TRUE	II	FALSE	FALSE	TRUE	Ranitomeya yavaricola Pérez-Peña, Chávez, Twomey, and Brown, 2010	2010
Caudata	Hynobiidae	Hynobiinae	Ranodon	sibiricus	Ranodon sibiricus		Semirechensk Salamander, Central Asian Salamander	Ranodon sibiricus			Endangered (EN)	CN,KZ		Ranodon sibiricus	FALSE	FALSE	FALSE	FALSE	FALSE	FALSE	FALSE	FALSE	FALSE	TRUE	TRUE	Ranodon sibiricus Kessler, 1866	1866
Anura	Bufonidae		Rentapia	hosii	Rentapia hosii		Rentap's Asian Tree Toad	Rentapia hosii	Pedostibes hosii		Least Concern (LC)	ID,MY,TH		Rentapia hosii	TRUE	TRUE	TRUE	TRUE	FALSE	TRUE	FALSE	FALSE	TRUE	FALSE	TRUE	Rentapia hosii (Boulenger, 1892)	1892
Anura	Rhacophoridae	Rhacophorinae	Rhacophorus	annamensis	Rhacophorus annamensis			Rhacophorus annamensis	Rhacophorus notater		Least Concern (LC)	VN		Rhacophorus annamensis	TRUE	TRUE	TRUE	TRUE	FALSE	TRUE	FALSE	FALSE	TRUE	TRUE	TRUE	Rhacophorus annamensis Smith, 1924	1924
Anura	Rhacophoridae	Rhacophorinae	Rhacophorus	bipunctatus	Rhacophorus bipunctatus		Double-spotted Orange-webbed Treefrog	Rhacophorus bipunctatus			Least Concern (LC)	BT,CN,IN,MM,VN		Rhacophorus bipunctatus	FALSE	TRUE	TRUE	FALSE	FALSE	TRUE	FALSE	FALSE	FALSE	TRUE	TRUE	Rhacophorus bipunctatus Ahl, 1927	1927
Anura	Rhacophoridae	Rhacophorinae	Rhacophorus	calcaneus	Rhacophorus calcaneus			Rhacophorus calcaneus	Rhacophorus chuyangsinensis		Near Threatened (NT)	LA,VN		Rhacophorus calcaneus	FALSE	FALSE	FALSE	TRUE	FALSE	TRUE	FALSE	FALSE	FALSE	TRUE	TRUE	Rhacophorus calcaneus Smith, 1924	1924
Anura	Rhacophoridae	Rhacophorinae	Rhacophorus	exechopygus	Rhacophorus exechopygus			Rhacophorus exechopygus			Least Concern (LC)	LA,VN		Rhacophorus exechopygus	TRUE	TRUE	TRUE	FALSE	FALSE	TRUE	FALSE	FALSE	FALSE	TRUE	TRUE	Rhacophorus exechopygus Inger, Orlov, and Darevsky, 1999	1999
Anura	Rhacophoridae	Rhacophorinae	Rhacophorus	helenae	Rhacophorus helenae		HelenÃ¢â¬â¢s Tree Frog	Rhacophorus helenae			Endangered (EN)	VN		Rhacophorus helenae	FALSE	FALSE	FALSE	TRUE	FALSE	TRUE	FALSE	FALSE	FALSE	TRUE	TRUE	Rhacophorus helenae Rowley, Tran, Hoang, and Le, 2012	2012
Anura	Rhacophoridae	Rhacophorinae	Rhacophorus	kio	Rhacophorus kio		Asian Black-webbed Treefrog	Rhacophorus kio			Least Concern (LC)	KH,CN,IN,LA,TH,VN		Rhacophorus kio	FALSE	FALSE	FALSE	FALSE	FALSE	FALSE	FALSE	FALSE	FALSE	TRUE	TRUE	Rhacophorus kio Ohler and Delorme, 2006	2006
Anura	Rhacophoridae	Rhacophorinae	Rhacophorus	margaritifer	Rhacophorus margaritifer			Rhacophorus margaritifer			Least Concern (LC)	ID		Rhacophorus margaritifer	TRUE	FALSE	TRUE	FALSE	FALSE	TRUE	FALSE	FALSE	TRUE	TRUE	TRUE	Rhacophorus margaritifer (Schlegel, 1837)	1837
Anura	Rhacophoridae	Rhacophorinae	Rhacophorus	nigropalmatus	Rhacophorus nigropalmatus		Wallace's Flying Frog, WallaceÃ¢â¬â¢s Treefrog	Rhacophorus nigropalmatus			Least Concern (LC)	ID,MY,MM,TH		Rhacophorus nigropalmatus	TRUE	TRUE	TRUE	TRUE	FALSE	TRUE	FALSE	FALSE	TRUE	TRUE	TRUE	Rhacophorus nigropalmatus Boulenger, 1895	1895
Anura	Rhacophoridae	Rhacophorinae	Rhacophorus	orlovi	Rhacophorus orlovi			Rhacophorus orlovi			Least Concern (LC)	KH,LA,VN		Rhacophorus orlovi	FALSE	FALSE	FALSE	FALSE	FALSE	FALSE	FALSE	FALSE	FALSE	TRUE	TRUE	Rhacophorus orlovi Ziegler and Köhler, 2001	2001
Anura	Rhacophoridae	Rhacophorinae	Rhacophorus	pardalis	Rhacophorus pardalis		Harlequin Tree Frog, Gliding Tree Frog, Panther Tree Frog	Rhacophorus pardalis			Least Concern (LC)	PH,MY,ID		Rhacophorus pardalis	TRUE	FALSE	TRUE	TRUE	FALSE	TRUE	FALSE	FALSE	TRUE	FALSE	TRUE	Rhacophorus pardalis Günther, 1858	1858
Anura	Rhacophoridae	Rhacophorinae	Rhacophorus	reinwardtii	Rhacophorus reinwardtii		Reinwardt's Flying Frog, Black-webbed Treefrog, Green Flying Frog	Rhacophorus reinwardtii	Hyla reinwardtii	Hyla reinwardtii	Near Threatened (NT)	ID,MY		Rhacophorus reinwardtii	TRUE	TRUE	TRUE	TRUE	FALSE	TRUE	FALSE	FALSE	TRUE	TRUE	TRUE	Rhacophorus reinwardtii (Schlegel, 1840)	1840
Anura	Rhacophoridae	Rhacophorinae	Rhacophorus	rhodopus	Rhacophorus rhodopus			Rhacophorus rhodopus	Rhacophorus namdaphaensis	Rhacophorus namdaphaensis	Least Concern (LC)	KH,CN,IN,LA,TH,VN		Rhacophorus rhodopus	FALSE	FALSE	FALSE	TRUE	FALSE	TRUE	FALSE	FALSE	TRUE	FALSE	TRUE	Rhacophorus rhodopus Liu and Hu, 1960	1960
Anura	Bufonidae		Rhaebo	blombergi	Rhaebo blombergi			Rhaebo blombergi	Bufo blombergi	Bufo blombergi	Near Threatened (NT)	EC,CO		Rhaebo blombergi	FALSE	TRUE	TRUE	FALSE	FALSE	TRUE	FALSE	FALSE	TRUE	TRUE	TRUE	Rhaebo blombergi (Myers and Funkhouser, 1951)	1951
Anura	Bufonidae		Rhaebo	guttatus	Rhaebo guttatus			Rhaebo guttatus	Bufo guttatus, Bufo melini, Bufo anderssoni	Bufo guttatus, Bufo melini, Bufo anderssoni	Least Concern (LC)	BO,BR,CO,EC,GF,GY,PE,SR,VE		Rhaebo guttatus	TRUE	TRUE	TRUE	FALSE	FALSE	TRUE	FALSE	FALSE	TRUE	TRUE	TRUE	Rhaebo guttatus (Schneider, 1799)	1799
Anura	Bufonidae		Rhaebo	haematiticus	Rhaebo haematiticus			Rhaebo haematiticus	Bufo haematiticus, Bufo melanogaster, Bufo caeruleocellatus	Bufo haematiticus, Bufo melanogaster, Bufo caeruleocellatus	Least Concern (LC)	CO,CR,EC,HN,NI,PA,VE		Rhaebo haematiticus	FALSE	FALSE	FALSE	FALSE	FALSE	FALSE	FALSE	FALSE	FALSE	TRUE	TRUE	Rhaebo haematiticus (Cope, 1862)	1862
Gymnophiona	Rhinatrematidae		Rhinatrema	bivittatum	Rhinatrema bivittatum			Rhinatrema bivittatum			Least Concern (LC)	BR,SR,GF,GY		Rhinatrema bivittatum	FALSE	FALSE	FALSE	TRUE	FALSE	TRUE	FALSE	FALSE	FALSE	FALSE	TRUE	Rhinatrema bivittatum (Guérin-Méneville, 1838)	1838
Anura	Bufonidae		Rhinella	arenarum	Rhinella arenarum			Rhinella arenarum	Bufo arenarum	Bufo arenarum	Least Concern (LC)	UY,BR,BO,AR		Rhinella arenarum	FALSE	TRUE	TRUE	FALSE	FALSE	TRUE	FALSE	FALSE	FALSE	FALSE	TRUE	Rhinella arenarum (Hensel, 1867)	1867
Anura	Bufonidae		Rhinella	atacamensis	Rhinella atacamensis			Rhinella atacamensis	Bufo atacamensis, Chaunus atacamensis, Bufo spinulosus atacamensis	Bufo atacamensis, Chaunus atacamensis, Bufo spinulosus atacamensis	Vulnerable (VU)	CL		Rhinella atacamensis	TRUE	FALSE	TRUE	FALSE	FALSE	TRUE	FALSE	FALSE	FALSE	FALSE	TRUE	Rhinella atacamensis (Cei, 1962)	1962
Anura	Bufonidae		Rhinella	diptycha	Rhinella diptycha		Cope's Toad, Schneider's Toad	Rhinella diptycha	Bufo diptychus	Bufo diptychus	Data Deficient (DD)	AR,BO,BR,PY,UY		Rhinella diptycha	FALSE	FALSE	FALSE	FALSE	FALSE	FALSE	FALSE	FALSE	TRUE	FALSE	TRUE	Rhinella diptycha (Cope, 1862)	1862
Anura	Bufonidae		Rhinella	granulosa	Rhinella granulosa			Rhinella granulosa	Bufo granulosus, Bufo manicorensis, Bufo globulosus	Bufo granulosus, Bufo manicorensis, Bufo globulosus	Least Concern (LC)	BR		Rhinella granulosa	FALSE	TRUE	TRUE	TRUE	FALSE	TRUE	FALSE	FALSE	TRUE	TRUE	TRUE	Rhinella granulosa (Spix, 1824)	1824
Anura	Bufonidae		Rhinella	humboldti	Rhinella humboldti			Rhinella beebei	Bufo humboldti, Rhinella beebei, Chaunus beebei	Chaunus beebei, Rhinella beebei	Least Concern (LC)	CO		Rhinella humboldti	FALSE	TRUE	TRUE	FALSE	FALSE	TRUE	FALSE	FALSE	FALSE	FALSE	TRUE	Rhinella humboldti (Gallardo, 1965)	1965
Anura	Bufonidae		Rhinella	icterica	Rhinella icterica		Yellow Cururu Toad	Rhinella icterica	Bufo ictericus, Bufo missionum, Bufo bimaculatus	Bufo ictericus, Bufo missionum, Bufo bimaculatus	Least Concern (LC)	PY,BR		Rhinella icterica	TRUE	FALSE	TRUE	FALSE	FALSE	TRUE	FALSE	FALSE	FALSE	FALSE	TRUE	Rhinella icterica (Spix, 1824)	1824
Anura	Bufonidae		Rhinella	lescurei	Rhinella lescurei	margaritifera		Rhinella lescurei			Data Deficient (DD)	GF,SR		Rhinella lescurei	TRUE	FALSE	TRUE	TRUE	FALSE	TRUE	FALSE	FALSE	FALSE	FALSE	TRUE	Rhinella lescurei Fouquet, Gaucher, Blanc, and Vélez-Rodriguez, 2007	2007
Anura	Bufonidae		Rhinella	margaritifera	Rhinella margaritifera	margaritifera		Rhinella margaritifera	Bufo margaritifer, Rana margaritifera, Rana gemmata	Bufo margaritifer, Rana margaritifera, Rana gemmata	Least Concern (LC)	BR,CO,EC,PE		Rhinella margaritifera	TRUE	TRUE	TRUE	TRUE	FALSE	TRUE	FALSE	FALSE	TRUE	TRUE	TRUE	Rhinella margaritifera (Laurenti, 1768)	1768
Anura	Bufonidae		Rhinella	marina	Rhinella marina		South American Cane Toad, Cane Toad, Marine Toad, Giant Toad	Rhinella marina	Bufo marinus, Rhinella marinus, Chaunus marina, Rana marina, Bufo brasiliensis	Bufo marinus, Rana marina, Bufo brasiliensis	Least Concern (LC)	AI,AG,AW,AU,BB,BO,BR,KY,CO,CR,DO,EC,FJ,GF,GD,GP,GU,GY,HT,JM,JP,MQ,MU,MS,MP,PG,PE,PH,PR,KN,LC,VC,SB,SR,TW,TT,US,VE,VI		Rhinella marina	TRUE	TRUE	TRUE	TRUE	FALSE	TRUE	FALSE	FALSE	TRUE	FALSE	TRUE	Rhinella marina (Linnaeus, 1758)	1758
Anura	Bufonidae		Rhinella	martyi	Rhinella martyi	margaritifera		Rhinella martyi			Least Concern (LC)	BR,GF,GY,SR		Rhinella martyi	TRUE	FALSE	TRUE	TRUE	FALSE	TRUE	FALSE	FALSE	FALSE	FALSE	TRUE	Rhinella martyi Fouquet, Gaucher, Blanc, and Vélez-Rodriguez, 2007	2007
Anura	Bufonidae		Rhinella	pygmaea	Rhinella pygmaea			Rhinella pygmaea	Bufo pygmaeus	Bufo pygmaeus	Least Concern (LC)	BR		Rhinella pygmaea	FALSE	TRUE	TRUE	FALSE	FALSE	TRUE	FALSE	FALSE	TRUE	TRUE	TRUE	Rhinella pygmaea (Myers and Carvalho, 1952)	1952
Anura	Bufonidae		Rhinella	rubescens	Rhinella rubescens			Rhinella rubescens	Bufo rufus, Bufo rubescens, Chaunus rubescens	Bufo rufus, Bufo rubescens, Chaunus rubescens	Least Concern (LC)	BR		Rhinella rubescens	FALSE	TRUE	TRUE	FALSE	FALSE	TRUE	FALSE	FALSE	FALSE	FALSE	TRUE	Rhinella rubescens (Lutz, 1925)	1925
Anura	Bufonidae		Rhinella	rubropunctata	Rhinella rubropunctata			Rhinella rubropunctata	Bufo rubropunctatus, Phryne rubropunctata, Chaunus rubropunctatus	Bufo rubropunctatus, Phryne rubropunctata, Chaunus rubropunctatus	Vulnerable (VU)	CL,AR		Rhinella rubropunctata	FALSE	TRUE	TRUE	FALSE	FALSE	TRUE	FALSE	FALSE	FALSE	FALSE	TRUE	Rhinella rubropunctata (Guichenot, 1848)	1848
Anura	Bufonidae		Rhinella	schneideri	Rhinella schneideri		Cururu Toad, Rococo Toad	Rhinella schneideri	Bufo paracnemis, Bufo schneideri, Chaunus schneideri	Bufo paracnemis, Bufo schneideri, Chaunus schneideri	Least Concern (LC)	AR,BO,BR,PY,UY		Rhinella schneideri	TRUE	TRUE	TRUE	FALSE	FALSE	TRUE	FALSE	FALSE	TRUE	FALSE	TRUE	Werner, 1894	1894
Anura	Bufonidae		Rhinella	sclerocephala	Rhinella sclerocephala	margaritifera		Rhinella sclerocephala	Bufo sclerocephalus	Bufo sclerocephalus	Endangered (EN)	VE		Rhinella sclerocephala	FALSE	FALSE	FALSE	FALSE	FALSE	FALSE	FALSE	FALSE	FALSE	TRUE	TRUE	Rhinella sclerocephala (Mijares-Urrutia and Arends-R., 2001)	2001
Anura	Bufonidae		Rhinella	spinulosa	Rhinella spinulosa			Rhinella spinulosa	Bufo nigricans, Bufo spinulosus, Bufo simus	Bufo nigricans, Bufo spinulosus, Bufo simus	Least Concern (LC)	EC,PE,BO,CL,AR		Rhinella spinulosa	FALSE	FALSE	FALSE	FALSE	FALSE	FALSE	FALSE	FALSE	FALSE	TRUE	TRUE	Rhinella spinulosa (Wiegmann, 1834)	1834
Anura	Rhinodermatidae		Rhinoderma	darwinii	Rhinoderma darwinii		Darwin's Frog, Ranita de Darwin	Rhinoderma darwinii			Vulnerable (VU)	AR,CL		Rhinoderma darwinii	FALSE	TRUE	TRUE	TRUE	FALSE	TRUE	FALSE	FALSE	FALSE	FALSE	TRUE	Rhinoderma darwinii Duméril and Bibron, 1841	1841
Anura	Rhinophrynidae		Rhinophrynus	dorsalis	Rhinophrynus dorsalis		Mexican Burrowing Toad, Burrowing Toad	Rhinophrynus dorsalis			Least Concern (LC)	CR,NI,HN,BZ,SV,GT,MX,US		Rhinophrynus dorsalis	TRUE	TRUE	TRUE	TRUE	FALSE	TRUE	FALSE	FALSE	FALSE	FALSE	TRUE	Rhinophrynus dorsalis Duméril and Bibron, 1841	1841
Caudata	Rhyacotritonidae		Rhyacotriton	olympicus	Rhyacotriton olympicus		Olympic Torrent Salamander	Rhyacotriton olympicus	Ranodon olympicus	Ranodon olympicus	Vulnerable (VU)	US		Rhyacotriton olympicus	FALSE	FALSE	FALSE	TRUE	FALSE	TRUE	FALSE	FALSE	FALSE	FALSE	TRUE	Rhyacotriton olympicus (Gaige, 1917)	1917
Anura	Centrolenidae	Centroleninae	Sachatamia	albomaculata	Sachatamia albomaculata		Yellow-flecked Cascade Glassfrog White-spotted glassfrog, Rana de Cristal de Cascada, Rana de cristal de puntos blancos	Sachatamia albomaculata			Least Concern (LC)	CO,CR,EC,HN,PA		Sachatamia albomaculata	TRUE	FALSE	TRUE	FALSE	FALSE	TRUE	FALSE	FALSE	FALSE	FALSE	TRUE	Sachatamia albomaculata (Taylor, 1949)	1949
Caudata	Salamandridae	Salamandrinae	Salamandra	algira	Salamandra algira	Salamandra	Algerian Salamander, North African Fire Salamander, Arous Chta	Salamandra algira			Vulnerable (VU)	DZ,MA		Salamandra algira	TRUE	TRUE	TRUE	FALSE	TRUE	TRUE	TRUE	III	FALSE	TRUE	TRUE	Salamandra algira Bedriaga, 1883	1883
Caudata	Salamandridae	Salamandrinae	Salamandra	atra	Salamandra atra	Alpanadra	Alpine salamander, black salamander, Alpensalamander, Salamandre noire, salamandra alpina, alpesalamander, alpi salamander, alpesi szalamandra, crni da*devnjak, alpenlandsalamander, salamandra czarna, salamander nair, salamandra e zezÃÂ«, alppisalam	Salamandra atra			Least Concern (LC)	AL,AT,BA,HR,FR,DE,IT,LI,ME,RS,SI,CH		Salamandra atra	TRUE	TRUE	TRUE	FALSE	FALSE	TRUE	FALSE	FALSE	FALSE	TRUE	TRUE	Salamandra atra Laurenti, 1768	1768
Caudata	Salamandridae	Salamandrinae	Salamandra	corsica	Salamandra corsica	Alpandra	Corsican fire salamander, korsischer feuersalamander	Salamandra corsica			Least Concern (LC)	FR		Salamandra corsica	TRUE	TRUE	TRUE	FALSE	FALSE	TRUE	FALSE	FALSE	FALSE	FALSE	TRUE	Salamandra corsica Savi, 1838	1838
Caudata	Salamandridae	Salamandrinae	Salamandra	infraimmaculata	Salamandra infraimmaculata	Oriandra		Salamandra infraimmaculata			Near Threatened (NT)	IR,IQ,IL,LB,SY,TR		Salamandra infraimmaculata	TRUE	TRUE	TRUE	FALSE	FALSE	TRUE	FALSE	FALSE	FALSE	FALSE	TRUE	Salamandra infraimmaculata Martens, 1885	1885
Caudata	Salamandridae	Salamandrinae	Salamandra	lanzai	Salamandra lanzai	Alpandra	Lanza's Alpine Salamander; Salamandra di Lanza	Salamandra lanzai			Vulnerable (VU)	FR,IT		Salamandra lanzai	FALSE	TRUE	TRUE	FALSE	FALSE	TRUE	FALSE	FALSE	FALSE	FALSE	TRUE	Salamandra lanzai Nascetti, Andreone, Capula, and Bullini, 1988	1988
Caudata	Salamandridae	Salamandrinae	Salamandra	salamandra	Salamandra salamandra	Salamandra	Fire Salamander	Salamandra salamandra			Least Concern (LC)	AL,AT,BE,BA,BG,HR,CZ,FR,DE,GR,HU,IT,LU,MK,ME,NL,PL,PT,RO,RS,SK,SI,ES,CH,TR,UA		Salamandra salamandra	TRUE	TRUE	TRUE	TRUE	FALSE	TRUE	FALSE	FALSE	TRUE	TRUE	TRUE	Salamandra salamandra (Linnaeus, 1758)	1758
Caudata	Hynobiidae	Hynobiinae	Salamandrella	keyserlingii	Salamandrella keyserlingii		Siberian Newt	Salamandrella keyserlingii			Least Concern (LC)	CN,JP,KP,MN,RU		Salamandrella keyserlingii	TRUE	TRUE	TRUE	TRUE	FALSE	TRUE	FALSE	FALSE	TRUE	FALSE	TRUE	Salamandrella keyserlingii Dybowski, 1870	1870
Caudata	Salamandridae	Salamandrininae	Salamandrina	perspicillata	Salamandrina perspicillata		Northern Spectacled Salamander	Salamandrina perspicillata	Salamandra perspicillata		Least Concern (LC)	IT		Salamandrina perspicillata	TRUE	FALSE	TRUE	FALSE	FALSE	TRUE	FALSE	FALSE	FALSE	FALSE	TRUE	Salamandrina perspicillata (Savi, 1821)	1821
Caudata	Salamandridae	Salamandrininae	Salamandrina	terdigitata	Salamandrina terdigitata		Southern Spectacled Salamander, Brillensalamander, Salamandrina dagli occhiali, Brillesalamander, Prillsalamander, Salamandra de antejos, salamandrine Ã lunettes, PÃÂ¡paszemes szalamandra, Brilsalamander, Salamandra okularowa, SimÃÂ¤lasisal	Salamandrina terdigitata	Salamandra tridactyla, Molge tridactyla	Salamandra tridactyla, Molge tridactyla	Least Concern (LC)	IT		Salamandrina terdigitata	FALSE	TRUE	TRUE	FALSE	FALSE	TRUE	FALSE	FALSE	FALSE	FALSE	TRUE	Salamandrina terdigitata (Bonnaterre, 1789)	1789
Anura	Ranidae		Sanguirana	aurantipunctata	Sanguirana aurantipunctata						NA	PH		Sanguirana aurantipunctata	FALSE	FALSE	FALSE	FALSE	FALSE	FALSE	FALSE	FALSE	FALSE	TRUE	TRUE	Sanguirana aurantipunctata Fuiten, Welton, Diesmos, Barley, Oberheide, Duya, Rico, and Brown, 2011	2011
Anura	Microhylidae	Scaphiophryninae	Scaphiophryne	boribory	Scaphiophryne boribory			Scaphiophryne boribory			Vulnerable (VU)	MG		Scaphiophryne boribory	FALSE	TRUE	TRUE	FALSE	FALSE	TRUE	TRUE	II	TRUE	TRUE	TRUE	Scaphiophryne boribory Vences, Raxworthy, Nussbaum, and Glaw, 2003	2003
Anura	Microhylidae	Scaphiophryninae	Scaphiophryne	brevis	Scaphiophryne brevis			Scaphiophryne brevis			Least Concern (LC)	MG		Scaphiophryne brevis	FALSE	FALSE	FALSE	TRUE	FALSE	TRUE	FALSE	FALSE	TRUE	FALSE	TRUE	Scaphiophryne brevis (Boulenger, 1896)	1896
Anura	Microhylidae	Scaphiophryninae	Scaphiophryne	calcarata	Scaphiophryne calcarata			Scaphiophryne calcarata			Least Concern (LC)	MG		Scaphiophryne calcarata	FALSE	FALSE	FALSE	TRUE	FALSE	TRUE	FALSE	FALSE	TRUE	FALSE	TRUE	Scaphiophryne calcarata (Mocquard, 1895)	1895
Anura	Microhylidae	Scaphiophryninae	Scaphiophryne	gottlebei	Scaphiophryne gottlebei		Gottlebe's Narrow-mouthed Frog; Sahon'orana (in Malagasy)	Scaphiophryne gottlebei			Endangered (EN)	MG		Scaphiophryne gottlebei	FALSE	TRUE	TRUE	TRUE	TRUE	TRUE	TRUE	II	TRUE	TRUE	TRUE	Scaphiophryne gottlebei Busse and Böhme, 1992	1992
Anura	Microhylidae	Scaphiophryninae	Scaphiophryne	madagascariensis	Scaphiophryne madagascariensis			Scaphiophryne madagascariensis			Near Threatened (NT)	MG		Scaphiophryne madagascariensis	TRUE	TRUE	TRUE	TRUE	FALSE	TRUE	FALSE	FALSE	TRUE	TRUE	TRUE	Scaphiophryne madagascariensis (Boulenger, 1882)	1882
Anura	Microhylidae	Scaphiophryninae	Scaphiophryne	marmorata	Scaphiophryne marmorata			Scaphiophryne marmorata			Vulnerable (VU)	MG		Scaphiophryne marmorata	TRUE	TRUE	TRUE	TRUE	TRUE	TRUE	TRUE	II	TRUE	TRUE	TRUE	Scaphiophryne marmorata Boulenger, 1882	1882
Anura	Microhylidae	Scaphiophryninae	Scaphiophryne	obscura	Scaphiophryne obscura			Scaphiophryne obscura	Pseudohemisus, Scaphiophryne	Pseudohemisus, Scaphiophryne	Data Deficient (DD)	MG		Scaphiophryne obscura	TRUE	TRUE	TRUE	FALSE	FALSE	TRUE	FALSE	FALSE	FALSE	FALSE	TRUE	Grandidier, 1872	1872
Anura	Microhylidae	Scaphiophryninae	Scaphiophryne	spinosa	Scaphiophryne spinosa			Scaphiophryne spinosa			Least Concern (LC)	MG		Scaphiophryne spinosa	TRUE	FALSE	TRUE	FALSE	TRUE	TRUE	TRUE	II	TRUE	TRUE	TRUE	Scaphiophryne spinosa Steindachner, 1882	1882
Anura	Microhylidae	Scaphiophryninae	Scaphiophryne	verrucosa	Scaphiophryne verrucosa			Scaphiophryne verrucosa	Pseudohemisus, Scaphiophryne	Pseudohemisus, Scaphiophryne	Data Deficient (DD)	MG		Scaphiophryne verrucosa	TRUE	TRUE	TRUE	FALSE	FALSE	TRUE	FALSE	FALSE	FALSE	FALSE	TRUE	Angel, 1930	1930
Anura	Scaphiopodidae		Scaphiopus	couchii	Scaphiopus couchii		Couch's Spadefoot, Couch's Spadefoot Toad	Scaphiopus couchii			Least Concern (LC)	US,MX		Scaphiopus couchii	TRUE	FALSE	TRUE	FALSE	FALSE	TRUE	FALSE	FALSE	TRUE	FALSE	TRUE	Scaphiopus couchii Baird, 1854	1854
Anura	Scaphiopodidae		Scaphiopus	holbrookii	Scaphiopus holbrookii		Eastern Spadefoot	Scaphiopus holbrookii	Rana holbrookii, Rana holbrookii albus	Rana holbrookii, Rana holbrookii albus	Least Concern (LC)	US		Scaphiopus holbrookii	TRUE	TRUE	TRUE	FALSE	FALSE	TRUE	FALSE	FALSE	TRUE	TRUE	TRUE	Scaphiopus holbrookii (Harlan, 1835)	1835
Anura	Bufonidae		Schismaderma	carens	Schismaderma carens		Red Toad	Schismaderma carens			Least Concern (LC)	AO,BW,CD,KE,MW,MZ,NA,ZA,SZ,TZ,ZM,ZW		Schismaderma carens	FALSE	TRUE	TRUE	TRUE	FALSE	TRUE	FALSE	FALSE	FALSE	FALSE	TRUE	Schismaderma carens (Smith, 1848)	1848
Gymnophiona	Dermophiidae		Schistometopum	gregorii	Schistometopum gregorii		East African Flood Plain Caecelian	Schistometopum gregorii			Least Concern (LC)	TZ,KE		Schistometopum gregorii	FALSE	FALSE	FALSE	TRUE	FALSE	TRUE	FALSE	FALSE	FALSE	FALSE	TRUE	Schistometopum gregorii (Boulenger, 1895)	1895
Gymnophiona	Dermophiidae		Schistometopum	thomense	Schistometopum thomense		SÃÂ£o TomÃÂ© Caecilian, cobra bobo	Schistometopum thomense			Least Concern (LC)	ST		Schistometopum thomense	FALSE	FALSE	FALSE	FALSE	FALSE	FALSE	FALSE	FALSE	FALSE	TRUE	TRUE	Schistometopum thomense (Bocage, 1873)	1873
Anura	Hylidae	Hylinae	Scinax	boesemani	Scinax boesemani			Scinax boesemani			Least Concern (LC)	VE,BR,SR,GF		Scinax boesemani	FALSE	FALSE	FALSE	TRUE	FALSE	TRUE	FALSE	FALSE	FALSE	FALSE	TRUE	Scinax boesemani (Goin, 1966)	1966
Anura	Hylidae	Hylinae	Scinax	garbei	Scinax garbei			Scinax garbei			Least Concern (LC)	BO,BR,CO,EC,PE		Scinax garbei	FALSE	FALSE	FALSE	TRUE	FALSE	TRUE	FALSE	FALSE	FALSE	FALSE	TRUE	Scinax garbei (Miranda-Ribeiro, 1926)	1926
Anura	Hylidae	Hylinae	Scinax	staufferi	Scinax staufferi		Middle American Snouted Treefrog	Scinax staufferi	Ololygon staufferi	Ololygon staufferi	Least Concern (LC)	BZ,CR,SV,GT,HN,MX,NI,PA		Scinax staufferi	FALSE	FALSE	FALSE	TRUE	FALSE	TRUE	FALSE	FALSE	FALSE	FALSE	TRUE	Scinax staufferi (Cope, 1865)	1865
Anura	Hylidae	Hylinae	Scinax	x-signatus	Scinax x-signatus	ruber	Venezuelan Snouted Treefrog	Scinax x-signatus			Least Concern (LC)	BR,CO,GY,SR,VE		Scinax x-signatus	FALSE	FALSE	FALSE	TRUE	FALSE	TRUE	FALSE	FALSE	FALSE	FALSE	TRUE	Scinax x-signatus (Spix, 1824)	1824
Anura	Bufonidae		Sclerophrys	garmani	Sclerophrys garmani		Garman's Toad	Sclerophrys garmani	Bufo garmani	Bufo garmani	Least Concern (LC)	AO,BW,ET,KE,MZ,NA,SO,ZA,SZ,TZ,ZM,ZW		Sclerophrys garmani	FALSE	TRUE	TRUE	TRUE	FALSE	TRUE	FALSE	FALSE	TRUE	FALSE	TRUE	Sclerophrys garmani (Meek, 1897)	1897
Anura	Bufonidae		Sclerophrys	maculata	Sclerophrys maculata		Flat-backed Toad	Sclerophrys maculata	Bufo maculatus	Bufo maculatus	Least Concern (LC)	BJ,CM,CI,GH,MZ,NG,SN,SL		Sclerophrys maculata	FALSE	FALSE	FALSE	FALSE	FALSE	FALSE	FALSE	FALSE	FALSE	TRUE	TRUE	Sclerophrys maculata (Hallowell, 1854)	1854
Anura	Bufonidae		Sclerophrys	mauritanica	Sclerophrys mauritanica		Mauritanian Toad	Sclerophrys mauritanica	Bufo mauritanicus		Least Concern (LC)	DZ,MA,TN		Sclerophrys mauritanica	TRUE	TRUE	TRUE	TRUE	FALSE	TRUE	FALSE	FALSE	TRUE	FALSE	TRUE	Sclerophrys mauritanica (Schlegel, 1841)	1841
Anura	Bufonidae		Sclerophrys	pardalis	Sclerophrys pardalis		Leopard Toad	Sclerophrys pardalis	Bufo pardalis, Bufo regularis pardalis, Amietophrynus pardalis	Bufo pardalis, Bufo regularis pardalis	Least Concern (LC)	ZA		Sclerophrys pardalis	TRUE	FALSE	TRUE	FALSE	FALSE	TRUE	FALSE	FALSE	FALSE	FALSE	TRUE	Sclerophrys pardalis (Hewitt, 1935)	1935
Anura	Bufonidae		Sclerophrys	regularis	Sclerophrys regularis		Common African toad	Sclerophrys regularis	Amietophrynus regularis, Bufo regularis	Bufo regularis	Least Concern (LC)	AO,BJ,BF,CM,CF,TD,CG,CD,EG,GQ,ER,ET,GA,GM,GH,GN,GW,KE,LR,MW,ML,MR,NE,NG,RE,RW,SN,SL,SD,TZ,TG,UG		Sclerophrys regularis	TRUE	TRUE	TRUE	FALSE	FALSE	TRUE	FALSE	FALSE	TRUE	TRUE	TRUE	Sclerophrys regularis (Reuss, 1833)	1833
Anura	Bufonidae		Sclerophrys	superciliaris	Sclerophrys superciliaris			Sclerophrys superciliaris	Amietophrynus superciliaris, Bufo superciliaris	Bufo superciliaris	Least Concern (LC)	BJ,CM,CF,CG,CD,CI,GQ,GA,GH,LR,NG,TG		Sclerophrys superciliaris	FALSE	TRUE	TRUE	FALSE	FALSE	TRUE	FALSE	FALSE	FALSE	TRUE	TRUE	Sclerophrys superciliaris (Boulenger, 1888)	1888
Anura	Bufonidae		Sclerophrys	togoensis	Sclerophrys togoensis			Sclerophrys togoensis	Bufo togoensis	Bufo togoensis	Near Threatened (NT)	CI,GH,GN,LR,SL,TG		Sclerophrys togoensis	FALSE	FALSE	FALSE	FALSE	FALSE	FALSE	FALSE	FALSE	FALSE	TRUE	TRUE	Sclerophrys togoensis (Ahl, 1924)	1924
Anura	Bufonidae		Sclerophrys	tuberosa	Sclerophrys tuberosa			Sclerophrys tuberosa	Bufo tuberosus	Bufo tuberosus	Least Concern (LC)	CM,CF,CG,CD,GQ,GA		Sclerophrys tuberosa	FALSE	TRUE	TRUE	FALSE	FALSE	TRUE	FALSE	FALSE	FALSE	FALSE	TRUE	Sclerophrys tuberosa (Günther, 1858)	1858
Gymnophiona	Scolecomorphidae		Scolecomorphus	kirkii	Scolecomorphus kirkii		Kirk's Caecilian	Scolecomorphus kirkii			Least Concern (LC)	MW,MZ,TZ		Scolecomorphus kirkii	FALSE	FALSE	FALSE	FALSE	FALSE	FALSE	FALSE	FALSE	FALSE	TRUE	TRUE	Scolecomorphus kirkii Boulenger, 1883	1883
Anura	Arthroleptidae		Scotobleps	gabonicus	Scotobleps gabonicus			Scotobleps gabonicus			Least Concern (LC)	CM,CG,CD,GQ,GA,NG		Scotobleps gabonicus	FALSE	FALSE	FALSE	TRUE	FALSE	TRUE	FALSE	FALSE	FALSE	FALSE	TRUE	Scotobleps gabonicus Boulenger, 1900	1900
Anura	Megophryidae	Leptobrachiinae	Scutiger	glandulatus	Scutiger glandulatus		Chest Gland Cat-eyed Toad	Scutiger glandulatus			Least Concern (LC)	CN		Scutiger glandulatus	FALSE	FALSE	FALSE	TRUE	FALSE	TRUE	FALSE	FALSE	FALSE	FALSE	TRUE	Scutiger glandulatus (Liu, 1950)	1950
Gymnophiona	Siphonopidae		Siphonops	annulatus	Siphonops annulatus		Ringed Caecilian	Siphonops annulatus			Least Concern (LC)	AR,BO,BR,CO,EC,GF,GY,PY,PE,SR,VE		Siphonops annulatus	FALSE	TRUE	TRUE	FALSE	FALSE	TRUE	FALSE	FALSE	FALSE	FALSE	TRUE	Siphonops annulatus (Mikan, 1822)	1822
Caudata	Sirenidae		Siren	intermedia	Siren intermedia		Lesser siren, Eastern Lesser Siren, Western Lesser Siren	Siren intermedia	Siren texana	Siren texana	Least Concern (LC)	US,MX		Siren intermedia	TRUE	TRUE	TRUE	TRUE	FALSE	TRUE	FALSE	FALSE	TRUE	FALSE	TRUE	Siren intermedia Barnes, 1826	1826
Caudata	Sirenidae		Siren	lacertina	Siren lacertina		Greater siren	Siren lacertina			Least Concern (LC)	US		Siren lacertina	TRUE	TRUE	TRUE	TRUE	FALSE	TRUE	FALSE	FALSE	TRUE	FALSE	TRUE	Siren lacertina Österdam, 1766	1766
Anura	Hylidae	Hylinae	Smilisca	baudinii	Smilisca baudinii		Common Mexican Treefrog, Mexican Treefrog, Mexican Smilisca	Smilisca baudinii			Least Concern (LC)	SV,BZ,NI,HN,GT,CR,MX,US		Smilisca baudinii	TRUE	FALSE	TRUE	TRUE	FALSE	TRUE	FALSE	FALSE	FALSE	FALSE	TRUE	Smilisca baudinii (Duméril and Bibron, 1841)	1841
Anura	Hylidae	Hylinae	Smilisca	phaeota	Smilisca phaeota		Masked Tree Frog, Central American Smilisca, Tarraco Treefrog	Smilisca phaeota			Least Concern (LC)	CO,CR,EC,HN,NI,PA		Smilisca phaeota	TRUE	FALSE	TRUE	TRUE	FALSE	TRUE	FALSE	FALSE	FALSE	FALSE	TRUE	Smilisca phaeota (Cope, 1862)	1862
Anura	Hylidae	Hylinae	Smilisca	sordida	Smilisca sordida		Drab Treefrog	Smilisca sordida			Least Concern (LC)	CO,CR,HN,NI,PA		Smilisca sordida	FALSE	FALSE	FALSE	TRUE	FALSE	TRUE	FALSE	FALSE	FALSE	FALSE	TRUE	Smilisca sordida (Peters, 1863)	1863
Anura	Scaphiopodidae		Spea	multiplicata	Spea multiplicata		Mexican Spadefoot, New Mexico Spadefoot	Spea multiplicata	Scaphiopus multiplicatus	Scaphiopus multiplicatus	Least Concern (LC)	US,MX		Spea multiplicata	TRUE	FALSE	TRUE	TRUE	FALSE	TRUE	FALSE	FALSE	FALSE	FALSE	TRUE	Spea multiplicata (Cope, 1863)	1863
Anura	Hylidae	Hylinae	Sphaenorhynchus	lacteus	Sphaenorhynchus lacteus	Sphaenorhynchus	Ghost Frog, Orinoco Lime Treefrog, Greater Hatchet-Faced Treefrog,	Sphaenorhynchus lacteus	Sphaenorhynchus eurhostus, Dryomelictes aurantiacus, Hyla lactea	Sphaenorhynchus eurhostus, Dryomelictes aurantiacus, Hyla lactea	Least Concern (LC)	BO,BR,CO,EC,PE,TT,VE		Sphaenorhynchus lacteus	TRUE	TRUE	TRUE	TRUE	FALSE	TRUE	FALSE	FALSE	TRUE	FALSE	TRUE	Sphaenorhynchus lacteus (Daudin, 1800)	1800
Anura	Microhylidae	Asterophryinae	Sphenophryne	cornuta	Sphenophryne cornuta			Sphenophryne cornuta			Least Concern (LC)	PG,ID		Sphenophryne cornuta	FALSE	FALSE	FALSE	TRUE	FALSE	TRUE	FALSE	FALSE	FALSE	FALSE	TRUE	Sphenophryne cornuta Peters and Doria, 1878	1878
Anura	Hemiphractidae		Stefania	evansi	Stefania evansi			Stefania evansi			Least Concern (LC)	VE,GY		Stefania evansi	FALSE	FALSE	FALSE	TRUE	FALSE	TRUE	FALSE	FALSE	FALSE	FALSE	TRUE	Stefania evansi (Boulenger, 1904)	1904
Anura	Strabomantidae	Strabomantinae	Strabomantis	bufoniformis	Strabomantis bufoniformis			Strabomantis bufoniformis	Eleutherodactylus bufoniformis	Eleutherodactylus bufoniformis	Least Concern (LC)	CO,PA,CR		Strabomantis bufoniformis	FALSE	FALSE	FALSE	TRUE	FALSE	TRUE	FALSE	FALSE	FALSE	FALSE	TRUE	Strabomantis bufoniformis (Boulenger, 1896)	1896
Anura	Bufonidae		Strauchbufo	raddei	Strauchbufo raddei		Mongolian Toad	Strauchbufo raddei	Bufo raddei, Bufo koslovi, Bufo brevipes	Bufo raddei, Bufo koslovi, Bufo brevipes	Least Concern (LC)	CN,KP,MN,RU		Strauchbufo raddei	FALSE	TRUE	TRUE	FALSE	FALSE	TRUE	FALSE	FALSE	TRUE	TRUE	TRUE	Strauchbufo raddei (Strauch, 1876)	1876
Anura	Pyxicephalidae	Cacosterninae	Strongylopus	fasciatus	Strongylopus fasciatus		Striped Stream Frog	Strongylopus fasciatus			Least Concern (LC)	LS,MZ,ZA,ZM,ZW		Strongylopus fasciatus	TRUE	FALSE	TRUE	FALSE	FALSE	TRUE	FALSE	FALSE	TRUE	FALSE	TRUE	Strongylopus fasciatus (Smith, 1849)	1849
Anura	Ranidae		Sylvirana	cubitalis	Sylvirana cubitalis			Sylvirana cubitalis	Rana cubitalis, Rana nigrotympanica, Hylarana nigrotympanica	Rana cubitalis, Rana nigrotympanica, Hylarana nigrotympanica	Least Concern (LC)	TH,MM		Sylvirana cubitalis	FALSE	TRUE	TRUE	FALSE	FALSE	TRUE	FALSE	FALSE	FALSE	FALSE	TRUE	Sylvirana cubitalis (Smith, 1917)	1917
Anura	Ranidae		Sylvirana	guentheri	Sylvirana guentheri		Guenther's Frog, Guenther's Amoy Frog	Sylvirana guentheri	Rana guentheri	Rana guentheri	Least Concern (LC)	BT,CN,GU,HK,MO,TW,VN		Sylvirana guentheri	TRUE	FALSE	TRUE	FALSE	FALSE	TRUE	FALSE	FALSE	FALSE	TRUE	TRUE	Sylvirana guentheri (Boulenger, 1882)	1882
Caudata	Salamandridae	Pleurodelinae	Taricha	granulosa	Taricha granulosa	Taricha	Rough-skinned Newt, Roughskin Newt, Northern Rough Skin Newt, Crater Lake Newt	Taricha granulosa	Salamandra granulosa	Salamandra granulosa	Least Concern (LC)	US,CA		Taricha granulosa	TRUE	TRUE	TRUE	TRUE	FALSE	TRUE	FALSE	FALSE	TRUE	FALSE	TRUE	Taricha granulosa (Skilton, 1849)	1849
Caudata	Salamandridae	Pleurodelinae	Taricha	rivularis	Taricha rivularis	Twittya	Red-bellied Newt, Redbelly Newt	Taricha rivularis			Least Concern (LC)	US		Taricha rivularis	TRUE	TRUE	TRUE	FALSE	FALSE	TRUE	FALSE	FALSE	TRUE	FALSE	TRUE	Taricha rivularis (Twitty, 1935)	1935
Caudata	Salamandridae	Pleurodelinae	Taricha	torosa	Taricha torosa	Taricha	California Newt, Coast Range Newt	Taricha torosa	Triton torosa	Triton torosa	Least Concern (LC)	US		Taricha torosa	TRUE	TRUE	TRUE	TRUE	FALSE	TRUE	FALSE	FALSE	TRUE	FALSE	TRUE	Taricha torosa (Rathke, 1833)	1833
Anura	Telmatobiidae		Telmatobius	arequipensis	Telmatobius arequipensis		Chili Water Frog	Telmatobius arequipensis			Vulnerable (VU)	PE		Telmatobius arequipensis	FALSE	FALSE	FALSE	FALSE	FALSE	FALSE	FALSE	FALSE	FALSE	TRUE	TRUE	Telmatobius arequipensis Vellard, 1955	1955
Anura	Telmatobiidae		Telmatobius	atahualpai	Telmatobius atahualpai			Telmatobius atahualpai			Vulnerable (VU)	PE		Telmatobius atahualpai	FALSE	FALSE	FALSE	FALSE	FALSE	FALSE	FALSE	FALSE	FALSE	TRUE	TRUE	Telmatobius atahualpai Wiens, 1993	1993
Anura	Telmatobiidae		Telmatobius	brevirostris	Telmatobius brevirostris			Telmatobius brevirostris			Endangered (EN)	PE		Telmatobius brevirostris	FALSE	FALSE	FALSE	FALSE	FALSE	FALSE	FALSE	FALSE	FALSE	TRUE	TRUE	Telmatobius brevirostris Vellard, 1955	1955
Anura	Telmatobiidae		Telmatobius	carrillae	Telmatobius carrillae			Telmatobius carrillae	Telmatobius carillae	Telmatobius carillae	Vulnerable (VU)	PE		Telmatobius carrillae	FALSE	FALSE	FALSE	FALSE	FALSE	FALSE	FALSE	FALSE	FALSE	TRUE	TRUE	Telmatobius carrillae Morales, 1988	1988
Anura	Telmatobiidae		Telmatobius	cirrhacelis	Telmatobius cirrhacelis		Loja Water Frog	Telmatobius cirrhacelis			Critically Endangered (CR)	EC		Telmatobius cirrhacelis	FALSE	FALSE	FALSE	FALSE	FALSE	FALSE	FALSE	FALSE	FALSE	TRUE	TRUE	Telmatobius cirrhacelis Trueb, 1979	1979
Anura	Telmatobiidae		Telmatobius	culeus	Telmatobius culeus		Titicaca Water Frog	Telmatobius culeus	Telmatobius albiventris, Telmatobius crawfordi	Telmatobius albiventris, Telmatobius crawfordi	Critically Endangered (CR)	PE,BO		Telmatobius culeus	FALSE	FALSE	FALSE	FALSE	TRUE	TRUE	TRUE	I	FALSE	TRUE	TRUE	Telmatobius culeus (Garman, 1876)	1876
Anura	Telmatobiidae		Telmatobius	gigas	Telmatobius gigas			Telmatobius gigas			Critically Endangered (CR)	BO		Telmatobius gigas	FALSE	FALSE	FALSE	FALSE	FALSE	FALSE	FALSE	FALSE	FALSE	TRUE	TRUE	Telmatobius gigas Vellard, 1969	1969
Anura	Telmatobiidae		Telmatobius	hockingi	Telmatobius hockingi			Telmatobius hockingi			Vulnerable (VU)	PE		Telmatobius hockingi	FALSE	FALSE	FALSE	FALSE	FALSE	FALSE	FALSE	FALSE	FALSE	TRUE	TRUE	Telmatobius hockingi Salas and Sinsch, 1996	1996
Anura	Telmatobiidae		Telmatobius	jelskii	Telmatobius jelskii			Telmatobius jelskii			Near Threatened (NT)	PE		Telmatobius jelskii	FALSE	FALSE	FALSE	FALSE	FALSE	FALSE	FALSE	FALSE	FALSE	TRUE	TRUE	Telmatobius jelskii (Peters, 1873)	1873
Anura	Telmatobiidae		Telmatobius	macrostomus	Telmatobius macrostomus			Telmatobius macrostomus	Batrachophrynus macrostomus		Endangered (EN)	PE,BO	After Barrionuevo, J. SebastiÃÂ¡n. 2017. Frogs at the summits: phylogeny of the Andean frogs of the genus Telmatobius (Anura, Telmatobiidae) based on phenotypic characters. Cladistics 33.1: 41-68. and Aguilar, CÃÂ©sar, and Niels Valencia	Telmatobius macrostomus	FALSE	FALSE	FALSE	TRUE	FALSE	TRUE	FALSE	FALSE	FALSE	TRUE	TRUE	Telmatobius macrostomus (Peters, 1873)	1873
Anura	Telmatobiidae		Telmatobius	marmoratus	Telmatobius marmoratus		Marbled Water Frog	Telmatobius marmoratus			Vulnerable (VU)	BO,CL,PE		Telmatobius marmoratus	FALSE	FALSE	FALSE	TRUE	FALSE	TRUE	FALSE	FALSE	FALSE	TRUE	TRUE	Telmatobius marmoratus (Duméril and Bibron, 1841)	1841
Anura	Telmatobiidae		Telmatobius	mayoloi	Telmatobius mayoloi			Telmatobius mayoloi			Endangered (EN)	PE		Telmatobius mayoloi	FALSE	FALSE	FALSE	FALSE	FALSE	FALSE	FALSE	FALSE	FALSE	TRUE	TRUE	Telmatobius mayoloi Salas and Sinsch, 1996	1996
Anura	Telmatobiidae		Telmatobius	niger	Telmatobius niger			Telmatobius niger	Telmatobius cinereus	Telmatobius cinereus	Critically Endangered (CR)	EC		Telmatobius niger	FALSE	FALSE	FALSE	FALSE	FALSE	FALSE	FALSE	FALSE	FALSE	TRUE	TRUE	Telmatobius niger Barbour and Noble, 1920	1920
Anura	Telmatobiidae		Telmatobius	peruvianus	Telmatobius peruvianus		Peru Water Frog	Telmatobius peruvianus			Vulnerable (VU)	CL,PE		Telmatobius peruvianus	FALSE	FALSE	FALSE	FALSE	FALSE	FALSE	FALSE	FALSE	FALSE	TRUE	TRUE	Telmatobius peruvianus Wiegmann, 1834	1834
Anura	Telmatobiidae		Telmatobius	punctatus	Telmatobius punctatus			Telmatobius punctatus			Endangered (EN)	PE		Telmatobius punctatus	FALSE	FALSE	FALSE	FALSE	FALSE	FALSE	FALSE	FALSE	FALSE	TRUE	TRUE	Telmatobius punctatus Vellard, 1955	1955
Anura	Telmatobiidae		Telmatobius	rimac	Telmatobius rimac		Rimac Water Frog	Telmatobius rimac			Vulnerable (VU)	PE		Telmatobius rimac	FALSE	FALSE	FALSE	FALSE	FALSE	FALSE	FALSE	FALSE	FALSE	TRUE	TRUE	Telmatobius rimac Schmidt, 1954	1954
Anura	Telmatobiidae		Telmatobius	truebae	Telmatobius truebae		Trueb's Water Frog	Telmatobius truebae			Vulnerable (VU)	PE		Telmatobius truebae	FALSE	FALSE	FALSE	FALSE	FALSE	FALSE	FALSE	FALSE	FALSE	TRUE	TRUE	Telmatobius truebae Wiens, 1993	1993
Anura	Telmatobiidae		Telmatobius	vellardi	Telmatobius vellardi		Vellard's Water Frog	Telmatobius vellardi			Critically Endangered (CR)	EC		Telmatobius vellardi	FALSE	FALSE	FALSE	FALSE	FALSE	FALSE	FALSE	FALSE	FALSE	TRUE	TRUE	Telmatobius vellardi Munsterman and Leviton, 1959	1959
Anura	Telmatobiidae		Telmatobius	ventriflavum	Telmatobius ventriflavum		Yellow-bellied Water Frog				NA	PE		Telmatobius ventriflavum	FALSE	FALSE	FALSE	FALSE	FALSE	FALSE	FALSE	FALSE	FALSE	TRUE	TRUE	Telmatobius ventriflavum Catenazzi, Vargas García, and Lehr, 2015	2015
Anura	Telmatobiidae		Telmatobius	verrucosus	Telmatobius verrucosus		Chaco Water Frog	Telmatobius verrucosus	Telmatobius jahuira	Telmatobius jahuira	Vulnerable (VU)	BO		Telmatobius verrucosus	FALSE	FALSE	FALSE	TRUE	FALSE	TRUE	FALSE	FALSE	FALSE	FALSE	TRUE	Telmatobius verrucosus Werner, 1899	1899
Anura	Centrolenidae	Centroleninae	Teratohyla	pulverata	Teratohyla pulverata		Dusty Glassfrog, Rana de Cristal polvosa	Teratohyla pulverata			Least Concern (LC)	CO,CR,EC,HN,NI,PA		Teratohyla pulverata	TRUE	TRUE	TRUE	FALSE	FALSE	TRUE	FALSE	FALSE	FALSE	FALSE	TRUE	Teratohyla pulverata (Peters, 1873)	1873
Anura	Rhacophoridae	Rhacophorinae	Theloderma	albopunctatum	Theloderma albopunctatum			Theloderma albopunctatum			Data Deficient (DD)	CN		Theloderma albopunctatum	TRUE	TRUE	TRUE	FALSE	FALSE	TRUE	FALSE	FALSE	FALSE	FALSE	TRUE	Theloderma albopunctatum (Liu and Hu, 1962)	1962
Anura	Rhacophoridae	Rhacophorinae	Theloderma	asperum	Theloderma asperum		Hill Garden Bug-eyed Frog, Pied Wart Frog	Theloderma asperum	Philautus albopunctatus, Ixalus asper, Rhacophorus asperrimus	Philautus albopunctatus, Ixalus asper, Rhacophorus asperrimus	Least Concern (LC)	KH,CN,IN,ID,LA,MY,MM,TH,VN		Theloderma asperum	TRUE	TRUE	TRUE	TRUE	FALSE	TRUE	FALSE	FALSE	TRUE	FALSE	TRUE	Theloderma asperum (Boulenger, 1886)	1886
Anura	Rhacophoridae	Rhacophorinae	Theloderma	auratum	Theloderma auratum		Golden Bug-eyed Frog; ÃÂ´ÃÅ ch CÃÂ¢y SÃÂ¢n VÃ ng.				NA	VN		Theloderma auratum	TRUE	FALSE	TRUE	FALSE	FALSE	TRUE	FALSE	FALSE	FALSE	FALSE	TRUE	Theloderma auratum Poyarkov, Kropachev, Gogoleva, and Orlov, 2018	2018
Anura	Rhacophoridae	Rhacophorinae	Theloderma	bicolor	Theloderma bicolor	Theloderma		Theloderma bicolor			Endangered (EN)	VN		Theloderma bicolor	TRUE	TRUE	TRUE	TRUE	FALSE	TRUE	FALSE	FALSE	TRUE	FALSE	TRUE	Theloderma bicolor (Bourret, 1937)	1937
Anura	Rhacophoridae	Rhacophorinae	Theloderma	corticale	Theloderma corticale	Theloderma		Theloderma corticale			Least Concern (LC)	VN		Theloderma corticale	TRUE	TRUE	TRUE	TRUE	FALSE	TRUE	FALSE	FALSE	TRUE	TRUE	TRUE	Theloderma corticale (Boulenger, 1903)	1903
Anura	Rhacophoridae	Rhacophorinae	Theloderma	gordoni	Theloderma gordoni	Theloderma		Theloderma gordoni			Least Concern (LC)	TH,VN		Theloderma gordoni	TRUE	TRUE	TRUE	FALSE	FALSE	TRUE	FALSE	FALSE	TRUE	TRUE	TRUE	Theloderma gordoni Taylor, 1962	1962
Anura	Rhacophoridae	Rhacophorinae	Theloderma	horridum	Theloderma horridum	Stelladerma		Theloderma horridum			Least Concern (LC)	ID,MY,SG,TH		Theloderma horridum	TRUE	TRUE	TRUE	TRUE	FALSE	TRUE	FALSE	FALSE	TRUE	FALSE	TRUE	Theloderma horridum (Boulenger, 1903)	1903
Anura	Rhacophoridae	Rhacophorinae	Theloderma	laeve	Theloderma laeve	Theloderma		Theloderma laeve	Theloderma bambusicolum, Chirixalus laevis	Chirixalus laevis	Data Deficient (DD)	VN		Theloderma laeve	FALSE	TRUE	TRUE	FALSE	FALSE	TRUE	FALSE	FALSE	FALSE	FALSE	TRUE	Theloderma laeve (Smith, 1924)	1924
Anura	Rhacophoridae	Rhacophorinae	Theloderma	lateriticum	Theloderma lateriticum	Theloderma	Brick-red Bug-eyed Frog, Ech cay san do	Theloderma lateriticum			Least Concern (LC)	VN		Theloderma lateriticum	TRUE	FALSE	TRUE	FALSE	FALSE	TRUE	FALSE	FALSE	FALSE	FALSE	TRUE	Theloderma lateriticum Bain, Nguyen, and Doan, 2009	2009
Anura	Rhacophoridae	Rhacophorinae	Theloderma	leporosum	Theloderma leporosum	Theloderma		Theloderma leporosum			Least Concern (LC)	ID,MY		Theloderma leporosum	TRUE	TRUE	TRUE	FALSE	FALSE	TRUE	FALSE	FALSE	FALSE	FALSE	TRUE	Theloderma leporosum Tschudi, 1838	1838
Anura	Rhacophoridae	Rhacophorinae	Theloderma	licin	Theloderma licin	Theloderma		Theloderma licin			Least Concern (LC)	MY,TH,VN		Theloderma licin	TRUE	TRUE	TRUE	TRUE	FALSE	TRUE	FALSE	FALSE	TRUE	FALSE	TRUE	Theloderma licin McLeod and Ahmad, 2007	2007
Anura	Rhacophoridae	Rhacophorinae	Theloderma	nebulosum	Theloderma nebulosum	Theloderma	Misty Moss Frog, &#7870;ch cÃÂ¢y s&#7847;n s&#432;&#417;ng mu	Theloderma nebulosum			Endangered (EN)	VN		Theloderma nebulosum	TRUE	FALSE	TRUE	FALSE	FALSE	TRUE	FALSE	FALSE	FALSE	FALSE	TRUE	Theloderma nebulosum Rowley, Le, Hoang, Dau, and Cao, 2011	2011
Anura	Rhacophoridae	Rhacophorinae	Theloderma	palliatum	Theloderma palliatum	Theloderma	Cloaked Moss Frog; Ãâ°ch cÃÂ¢y sÃÂ¢n trÃÂ¡ hinh	Theloderma palliatum	Theloderma chuyangsinense		Endangered (EN)	VN		Theloderma palliatum	TRUE	TRUE	TRUE	FALSE	FALSE	TRUE	FALSE	FALSE	FALSE	FALSE	TRUE	Theloderma palliatum Rowley, Le, Hoang, Dau, and Cao, 2011	2011
Anura	Rhacophoridae	Rhacophorinae	Theloderma	ryabovi	Theloderma ryabovi	Theloderma		Theloderma ryabovi			Endangered (EN)	VN		Theloderma ryabovi	TRUE	TRUE	TRUE	FALSE	FALSE	TRUE	FALSE	FALSE	FALSE	FALSE	TRUE	Theloderma ryabovi Orlov, Dutta, Ghate, and Kent, 2006	2006
Anura	Rhacophoridae	Rhacophorinae	Theloderma	stellatum	Theloderma stellatum	Stelladerma		Theloderma stellatum			Least Concern (LC)	KH,LA,TH,VN		Theloderma stellatum	TRUE	TRUE	TRUE	TRUE	FALSE	TRUE	FALSE	FALSE	TRUE	TRUE	TRUE	Theloderma stellatum Taylor, 1962	1962
Anura	Rhacophoridae	Rhacophorinae	Theloderma	vietnamense	Theloderma vietnamense	Stelladerma	South-Vietnamese Bug-Eyed Frog; Ech Cay San Viet Nam (Vietnamese)	Theloderma vietnamense			Least Concern (LC)	KH,VN		Theloderma vietnamense	TRUE	FALSE	TRUE	FALSE	FALSE	TRUE	FALSE	FALSE	FALSE	TRUE	TRUE	Theloderma vietnamense Poyarkov, Orlov, Moiseeva, Pawangkhanant, Ruangsuwan, Vassilieva, Galoyan, Nguyen, and Gogoleva, 2015	2015
Anura	Hylidae	Hylinae	Tlalocohyla	loquax	Tlalocohyla loquax		Mahogany Treefrog	Tlalocohyla loquax	Hyla loquax	Hyla loquax	Least Concern (LC)	BZ,CR,NI,HN,GT,MX		Tlalocohyla loquax	FALSE	TRUE	TRUE	TRUE	FALSE	TRUE	FALSE	FALSE	TRUE	FALSE	TRUE	Tlalocohyla loquax (Gaige and Stuart, 1934)	1934
Anura	Pyxicephalidae	Cacosterninae	Tomopterna	cryptotis	Tomopterna cryptotis		Cryptic sand frog	Tomopterna cryptotis			Least Concern (LC)	AO,BW,CM,TD,ER,ET,KE,LS,MW,MR,MZ,NA,NE,NG,SN,SO,ZA,SS,SD,SZ,TZ,UG,ZM,ZW		Tomopterna cryptotis	FALSE	FALSE	FALSE	TRUE	FALSE	TRUE	FALSE	FALSE	FALSE	FALSE	TRUE	Tomopterna cryptotis (Boulenger, 1907)	1907
Anura	Pyxicephalidae	Cacosterninae	Tomopterna	luganga	Tomopterna luganga			Tomopterna luganga			Least Concern (LC)	TZ		Tomopterna luganga	FALSE	FALSE	FALSE	FALSE	FALSE	FALSE	FALSE	FALSE	FALSE	TRUE	TRUE	Tomopterna luganga Channing, Moyer, and Dawood, 2004	2004
Anura	Pyxicephalidae	Cacosterninae	Tomopterna	marmorata	Tomopterna marmorata		Marbled sand frog	Tomopterna marmorata			Least Concern (LC)	BW,KE,MW,MZ,ZA,ZM,ZW		Tomopterna marmorata	FALSE	FALSE	FALSE	TRUE	FALSE	TRUE	FALSE	FALSE	FALSE	FALSE	TRUE	Tomopterna marmorata (Peters, 1854)	1854
Anura	Hylidae	Hylinae	Trachycephalus	coriaceus	Trachycephalus coriaceus		Surinam Goldeneye Tree Frog	Trachycephalus coriaceus	Phrynohyas coriacea	Phrynohyas coriacea	Least Concern (LC)	BO,BR,EC,GY,PE,SR		Trachycephalus coriaceus	TRUE	FALSE	TRUE	FALSE	FALSE	TRUE	FALSE	FALSE	FALSE	TRUE	TRUE	Trachycephalus coriaceus (Peters, 1867)	1867
Anura	Hylidae	Hylinae	Trachycephalus	hadroceps	Trachycephalus hadroceps			Trachycephalus hadroceps	Phrynohyas hadroceps	Phrynohyas hadroceps	Least Concern (LC)	BR,GY,SR		Trachycephalus hadroceps	FALSE	TRUE	TRUE	FALSE	FALSE	TRUE	FALSE	FALSE	FALSE	FALSE	TRUE	Trachycephalus hadroceps (Duellman and Hoogmoed, 1992)	1992
Anura	Hylidae	Hylinae	Trachycephalus	jordani	Trachycephalus jordani			Trachycephalus jordani	Tetraprion jordani	Tetraprion jordani	Least Concern (LC)	PE,EC,CO		Trachycephalus jordani	FALSE	FALSE	FALSE	FALSE	FALSE	FALSE	FALSE	FALSE	FALSE	TRUE	TRUE	Trachycephalus jordani (Stejneger and Test, 1891)	1891
Anura	Hylidae	Hylinae	Trachycephalus	nigromaculatus	Trachycephalus nigromaculatus			Trachycephalus nigromaculatus			Least Concern (LC)	BR		Trachycephalus nigromaculatus	TRUE	TRUE	TRUE	FALSE	FALSE	TRUE	FALSE	FALSE	FALSE	FALSE	TRUE	Trachycephalus nigromaculatus Tschudi, 1838	1838
Anura	Hylidae	Hylinae	Trachycephalus	resinifictrix	Trachycephalus resinifictrix		Boatman Frog, Wife Toad, Amazon Milk Frog	Trachycephalus resinifictrix	Phrynohyas resinifictrix	Phrynohyas resinifictrix	Least Concern (LC)	BO,BR,CO,EC,GF,PE,SR,VE		Trachycephalus resinifictrix	TRUE	TRUE	TRUE	TRUE	FALSE	TRUE	FALSE	FALSE	TRUE	FALSE	TRUE	Trachycephalus resinifictrix (Goeldi, 1907)	1907
Anura	Hylidae	Hylinae	Trachycephalus	typhonius	Trachycephalus typhonius		Pepper Treefrog	Trachycephalus typhonius	Phrynohyas venulosa, Rana venulosa, Rana reticularis	Phrynohyas venulosa, Rana venulosa, Rana reticularis	Least Concern (LC)	AR,BZ,BO,BR,CO,CR,GF,GT,GY,HN,MX,NI,PA,PY,PE,SR,TT,VE		Trachycephalus typhonius	FALSE	TRUE	TRUE	FALSE	FALSE	TRUE	FALSE	FALSE	TRUE	TRUE	TRUE	Trachycephalus typhonius (Linnaeus, 1758)	1758
Anura	Arthroleptidae		Trichobatrachus	robustus	Trichobatrachus robustus		Hairy Frog	Trichobatrachus robustus			Least Concern (LC)	AO,CM,CG,CD,GQ,GA,NG		Trichobatrachus robustus	TRUE	TRUE	TRUE	TRUE	FALSE	TRUE	FALSE	FALSE	TRUE	TRUE	TRUE	Trichobatrachus robustus Boulenger, 1900	1900
Anura	Hylidae	Hylinae	Triprion	petasatus	Triprion petasatus			Triprion petasatus			Least Concern (LC)	BZ,GT,HN,MX		Triprion petasatus	TRUE	TRUE	TRUE	TRUE	FALSE	TRUE	FALSE	FALSE	TRUE	TRUE	TRUE	Triprion petasatus (Cope, 1865)	1865
Caudata	Salamandridae	Pleurodelinae	Triturus	carnifex	Triturus carnifex	Triturus	Italian Crested Newt, Alpine Crested Newt, Tritone cristato, Triton crÃÂªte Italien, Alpenkammolch	Triturus carnifex			Least Concern (LC)	AT,BA,HR,CZ,HU,SI		Triturus carnifex	TRUE	TRUE	TRUE	FALSE	FALSE	TRUE	FALSE	FALSE	TRUE	FALSE	TRUE	Triturus carnifex (Laurenti, 1768)	1768
Caudata	Salamandridae	Pleurodelinae	Triturus	cristatus	Triturus cristatus	Triturus	Great Crested Newt	Triturus cristatus			Least Concern (LC)	AT,BY,BE,BG,CZ,DK,EE,FI,FR,DE,LV,LI,LT,LU,MD,NL,NO,PL,RO,RU,RS,SK,SE,CH,UA,GB		Triturus cristatus	TRUE	TRUE	TRUE	TRUE	FALSE	TRUE	FALSE	FALSE	TRUE	TRUE	TRUE	Triturus cristatus (Laurenti, 1768)	1768
Caudata	Salamandridae	Pleurodelinae	Triturus	dobrogicus	Triturus dobrogicus	Triturus	Danube Crested Newt	Triturus dobrogicus			Near Threatened (NT)	AT,BA,BG,HR,CZ,HU,MD,RO,RS,SK,UA		Triturus dobrogicus	TRUE	TRUE	TRUE	FALSE	FALSE	TRUE	FALSE	FALSE	TRUE	FALSE	TRUE	Triturus dobrogicus (Kiritzescu, 1903)	1903
Caudata	Salamandridae	Pleurodelinae	Triturus	karelinii	Triturus karelinii	Triturus	Southern Crested Newt	Triturus karelinii			Least Concern (LC)	AZ,GE,IR,RU,TR,UA		Triturus karelinii	TRUE	TRUE	TRUE	FALSE	FALSE	TRUE	FALSE	FALSE	TRUE	TRUE	TRUE	Triturus karelinii (Strauch, 1870)	1870
Caudata	Salamandridae	Pleurodelinae	Triturus	macedonicus	Triturus macedonicus	Triturus					NA	AL,BA,GR,MK,ME,RS		Triturus macedonicus	TRUE	TRUE	TRUE	FALSE	FALSE	TRUE	FALSE	FALSE	FALSE	FALSE	TRUE	Triturus macedonicus (Karaman, 1922)	1922
Caudata	Salamandridae	Pleurodelinae	Triturus	marmoratus	Triturus marmoratus	Pyronicia	Marbled Newt, marmormolch, triton marbrÃÂ©, tritÃÂ³n jaspeado, tritÃÂ£o-marmorado, tritÃÂ£o-verde, tritÃÂ³ verd, marmorsalamander, marmorvesilik, uhandre marmolairea, lagartixa d'agua, tritone marmorato, tritone marmorizzato, mar	Triturus marmoratus			Least Concern (LC)	FR,NL,PT,ES		Triturus marmoratus	TRUE	TRUE	TRUE	TRUE	FALSE	TRUE	FALSE	FALSE	TRUE	TRUE	TRUE	Triturus marmoratus (Latreille, 1800)	1800
Caudata	Salamandridae	Pleurodelinae	Triturus	pygmaeus	Triturus pygmaeus	Pyronicia	Pygmy Marbled Newt, Triton pigmeo, Triton verdinegro, Triton pygmee, Zwer-Marmormolch	Triturus pygmaeus			Near Threatened (NT)	PT,ES		Triturus pygmaeus	TRUE	TRUE	TRUE	FALSE	FALSE	TRUE	FALSE	FALSE	TRUE	FALSE	TRUE	Triturus pygmaeus (Wolterstorff, 1905)	1905
Caudata	Salamandridae	Pleurodelinae	Tylototriton	anguliceps	Tylototriton anguliceps	Tylototriton	Angular-headed newt	Tylototriton anguliceps			Least Concern (LC)	LA,TH,VN		Tylototriton anguliceps	FALSE	FALSE	FALSE	FALSE	FALSE	FALSE	TRUE	II	FALSE	TRUE	TRUE	Tylototriton anguliceps Le, Nguyen, Nishikawa, Nguyen, Pham, Matsui, Bernardes, and Nguyen, 2015	2015
Caudata	Salamandridae	Pleurodelinae	Tylototriton	asperrimus	Tylototriton asperrimus	Yaotriton	Black Knobby Newt	Tylototriton asperrimus			Near Threatened (NT)	VN,CN	Fei, Ye & Jiang 2012 Colored atlas of Chinese amphibians place this species in what others consider subgenus Yaotriton. Tylototriton hainanensis was placed in the synonymy of T. asperrimus by Yuan et al 2011 Zool Res 32: 577-584.	Tylototriton asperrimus	FALSE	TRUE	TRUE	FALSE	TRUE	TRUE	TRUE	II	TRUE	TRUE	TRUE	Tylototriton asperrimus Unterstein, 1930	1930
Caudata	Salamandridae	Pleurodelinae	Tylototriton	dabienicus	Tylototriton dabienicus	Yaotriton	Dabie Mountain Crocodile Newt				NA	CN	Fei, Ye & Jiang 2012 Colored atlas of Chinese amphibians place this species in what others consider subgenus Yaotriton.	Tylototriton dabienicus	FALSE	FALSE	FALSE	FALSE	FALSE	FALSE	TRUE	II	FALSE	TRUE	TRUE	Tylototriton dabienicus Chen, Wang, and Tao, 2010	2010
Caudata	Salamandridae	Pleurodelinae	Tylototriton	kweichowensis	Tylototriton kweichowensis	Tylototriton	Red-tailed Knobby Newt	Tylototriton kweichowensis			Vulnerable (VU)	CN		Tylototriton kweichowensis	TRUE	TRUE	TRUE	TRUE	TRUE	TRUE	TRUE	II	TRUE	TRUE	TRUE	Tylototriton kweichowensis Fang and Chang, 1932	1932
Caudata	Salamandridae	Pleurodelinae	Tylototriton	lizhengchangi	Tylototriton lizhengchangi	Yaotriton	Mangshan Crocodile Newt				NA	CN	Fei, Ye & Jiang 2012 Colored atlas of Chinese amphibians place this species Yaotriton, consider a subgenus by others.	Tylototriton lizhengchangi	FALSE	FALSE	FALSE	FALSE	FALSE	FALSE	TRUE	II	FALSE	TRUE	TRUE	Tylototriton lizhengchangi Hou, Zhang, Jiang, Li and Lu, 2012	2012
Caudata	Salamandridae	Pleurodelinae	Tylototriton	notialis	Tylototriton notialis	Yaotriton	Khammouan Crocodile Newt	Tylototriton notialis			Vulnerable (VU)	LA		Tylototriton notialis	FALSE	FALSE	FALSE	FALSE	FALSE	FALSE	TRUE	II	FALSE	TRUE	TRUE	Tylototriton notialis Stuart, Phimmachak, Sivongxay, and Robichaud, 2010	2010
Caudata	Salamandridae	Pleurodelinae	Tylototriton	podichthys	Tylototriton podichthys	Tylototriton	Luang Phabang Crocodile Newt	Tylototriton podichthys			Least Concern (LC)	LA		Tylototriton podichthys	FALSE	FALSE	FALSE	FALSE	FALSE	FALSE	TRUE	II	FALSE	TRUE	TRUE	Tylototriton podichthys Phimmachak, Aowphol, and Stuart, 2015	2015
Caudata	Salamandridae	Pleurodelinae	Tylototriton	pseudoverrucosus	Tylototriton pseudoverrucosus	Tylototriton	Southern Sichuan Crocodile Newt				NA	CN		Tylototriton pseudoverrucosus	FALSE	FALSE	FALSE	FALSE	FALSE	FALSE	TRUE	II	FALSE	TRUE	TRUE	Tylototriton pseudoverrucosus Hou, Gu, Zhang, Zeng, and Lu, 2012	2012
Caudata	Salamandridae	Pleurodelinae	Tylototriton	shanjing	Tylototriton shanjing	Tylototriton	Yunnan Newt	Tylototriton shanjing			Near Threatened (NT)	CN		Tylototriton shanjing	TRUE	TRUE	TRUE	TRUE	TRUE	TRUE	TRUE	II	FALSE	TRUE	TRUE	Tylototriton shanjing Nussbaum, Brodie, and Yang, 1995	1995
Caudata	Salamandridae	Pleurodelinae	Tylototriton	shanorum	Tylototriton shanorum	Tylototriton	Taunggyi Crocodile Newt	Tylototriton shanorum			Vulnerable (VU)	MM		Tylototriton shanorum	TRUE	TRUE	TRUE	FALSE	FALSE	TRUE	TRUE	II	FALSE	TRUE	TRUE	Tylototriton shanorum Nishikawa, Matsui, and Rao, 2014	2014
Caudata	Salamandridae	Pleurodelinae	Tylototriton	taliangensis	Tylototriton taliangensis	Tylototriton	Taliang Knobby Newt	Liangshantriton taliangensis	Liangshantriton taliangensis		Near Threatened (NT)	CN	Fei, Ye & Jiang 2012 Colored atlas of Chinese amphibians place this species in a new monotypic genus Liangshantriton, which was not diagnosed.	Tylototriton taliangensis	TRUE	TRUE	TRUE	TRUE	FALSE	TRUE	FALSE	FALSE	TRUE	TRUE	TRUE	Tylototriton taliangensis Liu, 1950	1950
Caudata	Salamandridae	Pleurodelinae	Tylototriton	verrucosus	Tylototriton verrucosus	Tylototriton	Himalayan Newt, Red Knobby Newt	Tylototriton verrucosus			Least Concern (LC)	BT,CN,IN,MM,NP,TH,VN		Tylototriton verrucosus	TRUE	TRUE	TRUE	TRUE	TRUE	TRUE	TRUE	II	TRUE	TRUE	TRUE	Tylototriton verrucosus Anderson, 1871	1871
Caudata	Salamandridae	Pleurodelinae	Tylototriton	vietnamensis	Tylototriton vietnamensis	Yaotriton	Vietnamese Crocodile Newt	Tylototriton vietnamensis			Endangered (EN)	VN		Tylototriton vietnamensis	FALSE	FALSE	FALSE	FALSE	TRUE	TRUE	TRUE	II	TRUE	TRUE	TRUE	Tylototriton vietnamensis Böhme, Schöttler, Nguyen, and Köhler, 2005	2005
Caudata	Salamandridae	Pleurodelinae	Tylototriton	wenxianensis	Tylototriton wenxianensis	Yaotriton	Wenxian Knobby Newt	Tylototriton wenxianensis			Vulnerable (VU)	CN	Fei, Ye & Jiang 2012 Colored atlas of Chinese amphibians place this species Yaotriton, consider a subgenus by others.	Tylototriton wenxianensis	TRUE	FALSE	TRUE	FALSE	FALSE	TRUE	TRUE	II	FALSE	TRUE	TRUE	Tylototriton wenxianensis Fei, Ye, and Yang, 1984	1984
Caudata	Salamandridae	Pleurodelinae	Tylototriton	yangi	Tylototriton yangi	Tylototriton	Tiannan Crocodile Newt, Tiannan Knobby Newt, YangÃ¢â¬â¢s Crocodile Newt		Tylototriton daweishanensis		NA	CN		Tylototriton yangi	TRUE	TRUE	TRUE	FALSE	FALSE	TRUE	TRUE	II	FALSE	TRUE	TRUE	Tylototriton yangi Hou, Zhang, Zhou, Li, and Lu, 2012	2012
Caudata	Salamandridae	Pleurodelinae	Tylototriton	ziegleri	Tylototriton ziegleri	Yaotriton	Ziegler's Crocodile Newt	Tylototriton ziegleri			Vulnerable (VU)	VN		Tylototriton ziegleri	TRUE	FALSE	TRUE	FALSE	FALSE	TRUE	TRUE	II	FALSE	FALSE	TRUE	Tylototriton ziegleri Nishikawa, Matsui, and Nguyen, 2013	2013
Gymnophiona	Typhlonectidae		Typhlonectes	compressicauda	Typhlonectes compressicauda			Typhlonectes compressicauda	Typhlonectes cunhai, Coecilia compressicauda, Typhlonectes anguillaformis	Typhlonectes cunhai, Coecilia compressicauda, Typhlonectes anguillaformis	Least Concern (LC)	BR,CO,GF,GY,PE,VE		Typhlonectes compressicauda	FALSE	TRUE	TRUE	FALSE	FALSE	TRUE	FALSE	FALSE	FALSE	FALSE	TRUE	Typhlonectes compressicauda (Duméril and Bibron, 1841)	1841
Gymnophiona	Typhlonectidae		Typhlonectes	natans	Typhlonectes natans			Typhlonectes natans			Least Concern (LC)	CO,VE		Typhlonectes natans	TRUE	TRUE	TRUE	TRUE	FALSE	TRUE	FALSE	FALSE	TRUE	TRUE	TRUE	Typhlonectes natans (Fischer, 1880)	1880
Anura	Bufonidae		Vandijkophrynus	robinsoni	Vandijkophrynus robinsoni		Paradise Toad	Vandijkophrynus robinsoni	Bufo robinsoni	Bufo robinsoni	Least Concern (LC)	ZA		Vandijkophrynus robinsoni	TRUE	TRUE	TRUE	FALSE	FALSE	TRUE	FALSE	FALSE	FALSE	FALSE	TRUE	Vandijkophrynus robinsoni (Branch and Braack, 1996)	1996
Anura	Megophryidae	Megophryinae	Xenophrys	aceras	Xenophrys aceras			Megophrys aceras	Megophrys aceras		Least Concern (LC)	TH,MY		Xenophrys aceras	TRUE	TRUE	TRUE	FALSE	FALSE	TRUE	FALSE	FALSE	FALSE	FALSE	TRUE	Megophrys aceras Boulenger, 1903	1903
Anura	Megophryidae	Megophryinae	Xenophrys	longipes	Xenophrys longipes			Megophrys longipes	Megophrys longipes		Near Threatened (NT)	MY,TH,VN		Xenophrys longipes	FALSE	FALSE	FALSE	TRUE	FALSE	TRUE	FALSE	FALSE	FALSE	FALSE	TRUE	Megophrys longipes Boulenger, 1886	1886
Anura	Megophryidae	Megophryinae	Xenophrys	parva	Xenophrys parva			Megophrys parva	Megophrys parva		Least Concern (LC)	BD,BT,CN,IN,LA,MM,NP,TH,VN	Fei, L., and C.-y. Ye. 2016. Amphibians of China, Volume 1. Beijing, China: Chengdu Institute of Biology, Chinese Academy of Sciences. Science Press. See Megophrys parva.	Xenophrys parva	FALSE	FALSE	FALSE	TRUE	FALSE	TRUE	FALSE	FALSE	FALSE	FALSE	TRUE	Megophrys parva (Boulenger, 1893)	1893
Anura	Pipidae		Xenopus	amieti	Xenopus amieti			Xenopus amieti			Near Threatened (NT)	CM		Xenopus amieti	FALSE	FALSE	FALSE	TRUE	FALSE	TRUE	FALSE	FALSE	FALSE	TRUE	TRUE	Xenopus amieti Kobel, du Pasquier, Fischberg, and Gloor, 1980	1980
Anura	Pipidae		Xenopus	andrei	Xenopus andrei			Xenopus andrei			Least Concern (LC)	AO,CM,CF,GA		Xenopus andrei	FALSE	FALSE	FALSE	FALSE	FALSE	FALSE	FALSE	FALSE	FALSE	TRUE	TRUE	Xenopus andrei Loumont, 1983	1983
Anura	Pipidae		Xenopus	clivii	Xenopus clivii			Xenopus clivii			Least Concern (LC)	ER,ET,KE,SS		Xenopus clivii	FALSE	FALSE	FALSE	TRUE	FALSE	TRUE	FALSE	FALSE	TRUE	FALSE	TRUE	Xenopus clivii Peracca, 1898	1898
Anura	Pipidae		Xenopus	fraseri	Xenopus fraseri			Xenopus fraseri			Data Deficient (DD)	BJ,NG		Xenopus fraseri	TRUE	FALSE	TRUE	FALSE	FALSE	TRUE	FALSE	FALSE	FALSE	TRUE	TRUE	Xenopus fraseri Boulenger, 1905	1905
Anura	Pipidae		Xenopus	gilli	Xenopus gilli		Cape Clawed Toad, Cape Platanna, GillÃ¢â¬â¢s Plantanna	Xenopus gilli			Endangered (EN)	ZA		Xenopus gilli	FALSE	FALSE	FALSE	TRUE	FALSE	TRUE	FALSE	FALSE	FALSE	FALSE	TRUE	Xenopus gilli Rose and Hewitt, 1927	1927
Anura	Pipidae		Xenopus	laevis	Xenopus laevis		Common Plantanna, African Clawed Frog	Xenopus laevis			Least Concern (LC)	AO,BW,CM,CF,CL,CN,CG,CD,EE,FR,GA,ID,IT,KE,LS,MW,MX,MZ,NA,NG,PT,ZA,SZ,TZ,GB,US,ZM,ZW		Xenopus laevis	TRUE	TRUE	TRUE	TRUE	FALSE	TRUE	FALSE	FALSE	TRUE	TRUE	TRUE	Xenopus laevis (Daudin, 1802)	1802
Anura	Pipidae		Xenopus	longipes	Xenopus longipes		Lake Oku Clawed Frog	Xenopus longipes			Critically Endangered (CR)	CM		Xenopus longipes	FALSE	FALSE	FALSE	TRUE	FALSE	TRUE	FALSE	FALSE	TRUE	FALSE	TRUE	Xenopus longipes Loumont and Kobel, 1991	1991
Anura	Pipidae		Xenopus	muelleri	Xenopus muelleri			Xenopus muelleri			Least Concern (LC)	AO,BJ,BW,BF,CM,CF,TD,CG,CD,CI,GH,KE,MW,MZ,NA,NG,ZA,SS,SZ,TZ,UG,ZM,ZW		Xenopus muelleri	TRUE	FALSE	TRUE	TRUE	FALSE	TRUE	FALSE	FALSE	FALSE	TRUE	TRUE	Xenopus muelleri (Peters, 1844)	1844
Anura	Pipidae		Xenopus	petersii	Xenopus petersii		Peter's Platanna	Xenopus petersii			Least Concern (LC)	AO,CG,CD,GA,MZ,NA,TZ,ZM		Xenopus petersii	FALSE	FALSE	FALSE	FALSE	FALSE	FALSE	FALSE	FALSE	FALSE	TRUE	TRUE	Xenopus petersii Bocage, 1895	1895
Anura	Pipidae		Xenopus	pygmaeus	Xenopus pygmaeus			Xenopus pygmaeus			Least Concern (LC)	CD,CF		Xenopus pygmaeus	FALSE	FALSE	FALSE	TRUE	FALSE	TRUE	FALSE	FALSE	FALSE	TRUE	TRUE	Xenopus pygmaeus Loumont, 1986	1986
Anura	Pipidae		Xenopus	ruwenzoriensis	Xenopus ruwenzoriensis			Xenopus ruwenzoriensis			Data Deficient (DD)	UG		Xenopus ruwenzoriensis	FALSE	FALSE	FALSE	FALSE	FALSE	FALSE	FALSE	FALSE	FALSE	TRUE	TRUE	Xenopus ruwenzoriensis Tymowska and Fischberg, 1973	1973
Anura	Pipidae		Xenopus	tropicalis	Xenopus tropicalis		Tropical Clawed Frogs	Xenopus tropicalis			Least Concern (LC)	BJ,BF,CI,GM,GH,GN,GW,LR,NG,SN,SL,TG		Xenopus tropicalis	TRUE	FALSE	TRUE	FALSE	FALSE	TRUE	FALSE	FALSE	TRUE	TRUE	TRUE	Xenopus tropicalis (Gray, 1864)	1864
Anura	Pipidae		Xenopus	vestitus	Xenopus vestitus			Xenopus vestitus			Least Concern (LC)	CD,RW,UG		Xenopus vestitus	FALSE	FALSE	FALSE	FALSE	FALSE	FALSE	FALSE	FALSE	FALSE	TRUE	TRUE	Xenopus vestitus Laurent, 1972	1972
Anura	Pipidae		Xenopus	wittei	Xenopus wittei			Xenopus wittei			Least Concern (LC)	CD,RW,UG		Xenopus wittei	FALSE	FALSE	FALSE	FALSE	FALSE	FALSE	FALSE	FALSE	FALSE	TRUE	TRUE	Xenopus wittei Tinsley, Kobel, and Fischberg, 1979	1979
Anura	Rhacophoridae	Rhacophorinae	Zhangixalus	arboreus	Zhangixalus arboreus		Kinugasa Flying Frog, Forest Green Treefrog	Rhacophorus arboreus	Rhacophorus arboreus		Least Concern (LC)	JP		Zhangixalus arboreus	TRUE	TRUE	TRUE	FALSE	FALSE	TRUE	FALSE	FALSE	TRUE	FALSE	TRUE	Zhangixalus arboreus (Okada and Kawano, 1924)	1924
Anura	Rhacophoridae	Rhacophorinae	Zhangixalus	arvalis	Zhangixalus arvalis		Farmland green flying frog, Farmland green tree frog	Rhacophorus arvalis	Rhacophorus arvalis		Endangered (EN)	TW		Zhangixalus arvalis	FALSE	FALSE	FALSE	FALSE	FALSE	FALSE	FALSE	FALSE	TRUE	FALSE	TRUE	Zhangixalus arvalis (Lue, Lai, and Chen, 1995)	1995
Anura	Rhacophoridae	Rhacophorinae	Zhangixalus	dennysi	Zhangixalus dennysi			Rhacophorus dennysi	Rhacophorus dennysi		Least Concern (LC)	CN,LA,MM,VN		Zhangixalus dennysi	TRUE	FALSE	TRUE	TRUE	FALSE	TRUE	FALSE	FALSE	TRUE	TRUE	TRUE	Zhangixalus dennysi (Blanford, 1881)	1881
Anura	Rhacophoridae	Rhacophorinae	Zhangixalus	feae	Zhangixalus feae			Rhacophorus feae	Rhacophorus feae		Least Concern (LC)	LA,VN,TH,MM,CN		Zhangixalus feae	TRUE	FALSE	TRUE	FALSE	FALSE	TRUE	FALSE	FALSE	FALSE	TRUE	TRUE	Zhangixalus feae (Boulenger, 1893)	1893
Anura	Rhacophoridae	Rhacophorinae	Zhangixalus	prominanus	Zhangixalus prominanus			Rhacophorus prominanus	Rhacophorus prominanus		Least Concern (LC)	TH,MY		Zhangixalus prominanus	TRUE	TRUE	TRUE	TRUE	FALSE	TRUE	FALSE	FALSE	TRUE	FALSE	TRUE	Zhangixalus prominanus (Smith, 1924)	1924
Anura	Rhacophoridae	Rhacophorinae	Zhangixalus	schlegelii	Zhangixalus schlegelii		Schlegel's Green Tree Frog	Rhacophorus schlegelii	Rhacophorus schlegelii		Least Concern (LC)	JP		Zhangixalus schlegelii	FALSE	FALSE	FALSE	FALSE	FALSE	FALSE	FALSE	FALSE	TRUE	FALSE	TRUE	Zhangixalus schlegelii (Günther, 1858)	1858
Anura	Rhacophoridae	Rhacophorinae	Zhangixalus	smaragdinus	Zhangixalus smaragdinus			Rhacophorus prasinatus	Rhacophorus maximus, Polypedates smaragdinus, Rhacophorus prasinatus		Near Threatened (NT)	BT,CN,IN,LA,NP,TH,VN	See Ohler, A., and K. Deuti. 2018. Polypedates smaragdinus Blyth, 1852Ã¢â¬âa senior subjective synonym of Rhacophorus maximus GÃÂ¼nther, 1858. Zootaxa 4375: 273Ã¢â¬â280.	Zhangixalus smaragdinus	FALSE	FALSE	FALSE	FALSE	FALSE	FALSE	FALSE	FALSE	TRUE	FALSE	TRUE	Zhangixalus smaragdinus (Blyth, 1852)	1852
Anura	Rhacophoridae	Rhacophorinae	Zhangixalus	viridis	Zhangixalus viridis		Okinawa Green Tree Frog, Okinawa Aogaeru, Amami Aogaeru, Amami Green Tree Frog	Rhacophorus viridis	Rhacophorus viridis		Least Concern (LC)	JP		Zhangixalus viridis	FALSE	FALSE	FALSE	FALSE	FALSE	FALSE	FALSE	FALSE	TRUE	FALSE	TRUE	Zhangixalus viridis (Hallowell, 1861)	1861
Anura	Ranidae		Abavorana	nazgul	Abavorana nazgul		Gunung Jerai Black Stream-Frog				NA	MY		Abavorana nazgul	FALSE	FALSE	FALSE	FALSE	FALSE	FALSE	FALSE	FALSE	FALSE	FALSE	FALSE	Abavorana nazgul Quah, Anuar, Grismer, Wood, Azizah, and Muin, 2017	2017
Anura	Hyperoliidae		Acanthixalus	sonjae	Acanthixalus sonjae			Acanthixalus sonjae			Near Threatened (NT)	CI,GH		Acanthixalus sonjae	FALSE	FALSE	FALSE	FALSE	FALSE	FALSE	FALSE	FALSE	FALSE	FALSE	FALSE	Acanthixalus sonjae Rödel, Kosuch, Veith, and Ernst, 2003	2003
Anura	Hyperoliidae		Acanthixalus	spinosus	Acanthixalus spinosus			Acanthixalus spinosus			Least Concern (LC)	CM,CD,GA,NG		Acanthixalus spinosus	FALSE	FALSE	FALSE	FALSE	FALSE	FALSE	FALSE	FALSE	FALSE	FALSE	FALSE	Acanthixalus spinosus (Buchholz and Peters, 1875)	1875
Anura	Hylidae	Hylinae	Acris	blanchardi	Acris blanchardi		Blanchard's Cricket Frog				NA	CA,MX,US		Acris blanchardi	FALSE	FALSE	FALSE	FALSE	FALSE	FALSE	FALSE	FALSE	FALSE	FALSE	FALSE	Acris blanchardi Harper, 1947	1947
Anura	Microhylidae	Adelastinae	Adelastes	hylonomos	Adelastes hylonomos			Adelastes hylonomos			Data Deficient (DD)	BR,VE		Adelastes hylonomos	FALSE	FALSE	FALSE	FALSE	FALSE	FALSE	FALSE	FALSE	FALSE	FALSE	FALSE	Adelastes hylonomos Zweifel, 1986	1986
Anura	Eleutherodactylidae	Phyzelaphryninae	Adelophryne	adiastola	Adelophryne adiastola			Adelophryne adiastola			Least Concern (LC)	BR,CO,EC,PE		Adelophryne adiastola	FALSE	FALSE	FALSE	FALSE	FALSE	FALSE	FALSE	FALSE	FALSE	FALSE	FALSE	Adelophryne adiastola Hoogmoed and Lescure, 1984	1984
Anura	Eleutherodactylidae	Phyzelaphryninae	Adelophryne	baturitensis	Adelophryne baturitensis			Adelophryne baturitensis			Vulnerable (VU)	BR		Adelophryne baturitensis	FALSE	FALSE	FALSE	FALSE	FALSE	FALSE	FALSE	FALSE	FALSE	FALSE	FALSE	Adelophryne baturitensis Hoogmoed, Borges, and Cascon, 1994	1994
Anura	Eleutherodactylidae	Phyzelaphryninae	Adelophryne	glandulata	Adelophryne glandulata		Teresensis Flea Frog; Razinha-Pulga Teresensis				NA	BR		Adelophryne glandulata	FALSE	FALSE	FALSE	FALSE	FALSE	FALSE	FALSE	FALSE	FALSE	FALSE	FALSE	Adelophryne glandulata Lourenço de Moraes, Ferreira, Fouquet, and Bastos, 2014	2014
Anura	Eleutherodactylidae	Phyzelaphryninae	Adelophryne	gutturosa	Adelophryne gutturosa		Guiana Shield Frog	Adelophryne gutturosa			Least Concern (LC)	BR,GY,VE		Adelophryne gutturosa	FALSE	FALSE	FALSE	FALSE	FALSE	FALSE	FALSE	FALSE	FALSE	FALSE	FALSE	Adelophryne gutturosa Hoogmoed and Lescure, 1984	1984
Anura	Eleutherodactylidae	Phyzelaphryninae	Adelophryne	maranguapensis	Adelophryne maranguapensis			Adelophryne maranguapensis			Endangered (EN)	BR		Adelophryne maranguapensis	FALSE	FALSE	FALSE	FALSE	FALSE	FALSE	FALSE	FALSE	FALSE	FALSE	FALSE	Adelophryne maranguapensis Hoogmoed, Borges, and Cascon, 1994	1994
Anura	Eleutherodactylidae	Phyzelaphryninae	Adelophryne	meridionalis	Adelophryne meridionalis						NA	BR		Adelophryne meridionalis	FALSE	FALSE	FALSE	FALSE	FALSE	FALSE	FALSE	FALSE	FALSE	FALSE	FALSE	Adelophryne meridionalis Santana, Fonseca, Neves, and Carvalho, 2012	2012
Anura	Eleutherodactylidae	Phyzelaphryninae	Adelophryne	michelin	Adelophryne michelin		Michelin Flea Frog; razinha-pulga-da-Michelin				NA	BR		Adelophryne michelin	FALSE	FALSE	FALSE	FALSE	FALSE	FALSE	FALSE	FALSE	FALSE	FALSE	FALSE	Adelophryne michelin Lourenço-de-Moraes, Dias, Mira-Mendes, Oliveira, Barth, Ruas, Vences, Solé, and Bastos, 2018	2018
Anura	Eleutherodactylidae	Phyzelaphryninae	Adelophryne	mucronatus	Adelophryne mucronatus						NA	BR		Adelophryne mucronatus	FALSE	FALSE	FALSE	FALSE	FALSE	FALSE	FALSE	FALSE	FALSE	FALSE	FALSE	Adelophryne mucronata Lourenço-de-Moraes, Solé, and Toledo, 2012	2012
Anura	Eleutherodactylidae	Phyzelaphryninae	Adelophryne	pachydactyla	Adelophryne pachydactyla			Adelophryne pachydactyla			Data Deficient (DD)	BR		Adelophryne pachydactyla	FALSE	FALSE	FALSE	FALSE	FALSE	FALSE	FALSE	FALSE	FALSE	FALSE	FALSE	Adelophryne pachydactyla Hoogmoed, Borges, and Cascon, 1994	1994
Anura	Eleutherodactylidae	Phyzelaphryninae	Adelophryne	patamona	Adelophryne patamona			Adelophryne patamona			Data Deficient (DD)	GY		Adelophryne patamona	FALSE	FALSE	FALSE	FALSE	FALSE	FALSE	FALSE	FALSE	FALSE	FALSE	FALSE	Adelophryne patamona MacCulloch, Lathrop, Kok, Minter, Khan, and Barrio-Amoros, 2008	2008
Anura	Myobatrachidae	Limnodynastinae	Adelotus	brevis	Adelotus brevis		Tusked Frog	Adelotus brevis			Near Threatened (NT)	AU		Adelotus brevis	FALSE	FALSE	FALSE	FALSE	FALSE	FALSE	FALSE	FALSE	FALSE	FALSE	FALSE	Adelotus brevis (Günther, 1863)	1863
Anura	Leptodactylidae	Leptodactylinae	Adenomera	ajurauna	Adenomera ajurauna			Adenomera ajurauna			Data Deficient (DD)	BR		Adenomera ajurauna	FALSE	FALSE	FALSE	FALSE	FALSE	FALSE	FALSE	FALSE	FALSE	FALSE	FALSE	Adenomera ajurauna (Berneck, Costa, and Garcia, 2008)	2008
Anura	Leptodactylidae	Leptodactylinae	Adenomera	araucaria	Adenomera araucaria			Adenomera araucaria	Leptodactylus araucaria	Leptodactylus araucaria	Least Concern (LC)	BR		Adenomera araucaria	FALSE	FALSE	FALSE	FALSE	FALSE	FALSE	FALSE	FALSE	FALSE	FALSE	FALSE	Adenomera araucaria Kwet and Angulo, 2002	2002
Anura	Leptodactylidae	Leptodactylinae	Adenomera	bokermanni	Adenomera bokermanni			Adenomera bokermanni	Leptodactylus bokermanni	Leptodactylus bokermanni	Least Concern (LC)	BR		Adenomera bokermanni	FALSE	FALSE	FALSE	FALSE	FALSE	FALSE	FALSE	FALSE	FALSE	FALSE	FALSE	Adenomera bokermanni (Heyer, 1973)	1973
Anura	Leptodactylidae	Leptodactylinae	Adenomera	chicomendesi	Adenomera chicomendesi		Chico MendesÃ¢â¬â¢ Terrestrial Nest-Building Frog				NA	BR		Adenomera chicomendesi	FALSE	FALSE	FALSE	FALSE	FALSE	FALSE	FALSE	FALSE	FALSE	FALSE	FALSE	Adenomera chicomendesi Carvalho, Angulo, Kokubum, Barrera, Souza, Haddad, and Giaretta, 2019	2019
Anura	Leptodactylidae	Leptodactylinae	Adenomera	coca	Adenomera coca			Adenomera coca			Data Deficient (DD)	BO		Adenomera coca	FALSE	FALSE	FALSE	FALSE	FALSE	FALSE	FALSE	FALSE	FALSE	FALSE	FALSE	Adenomera coca (Angulo and Reichle, 2008)	2008
Anura	Leptodactylidae	Leptodactylinae	Adenomera	cotuba	Adenomera cotuba						NA	BR		Adenomera cotuba	FALSE	FALSE	FALSE	FALSE	FALSE	FALSE	FALSE	FALSE	FALSE	FALSE	FALSE	Adenomera cotuba Carvalho and Giaretta, 2013	2013
Anura	Leptodactylidae	Leptodactylinae	Adenomera	diptyx	Adenomera diptyx			Adenomera diptyx	Leptodactylus diptyx	Leptodactylus diptyx	Least Concern (LC)	BO,BR,PY		Adenomera diptyx	FALSE	FALSE	FALSE	FALSE	FALSE	FALSE	FALSE	FALSE	FALSE	FALSE	FALSE	Adenomera diptyx (Boettger, 1885)	1885
Anura	Leptodactylidae	Leptodactylinae	Adenomera	engelsi	Adenomera engelsi						NA	BR		Adenomera engelsi	FALSE	FALSE	FALSE	FALSE	FALSE	FALSE	FALSE	FALSE	FALSE	FALSE	FALSE	Adenomera engelsi Kwet, Steiner, and Zillikens, 2009	2009
Anura	Leptodactylidae	Leptodactylinae	Adenomera	heyeri	Adenomera heyeri			Adenomera heyeri			Least Concern (LC)	BR,GF,SR		Adenomera heyeri	FALSE	FALSE	FALSE	FALSE	FALSE	FALSE	FALSE	FALSE	FALSE	FALSE	FALSE	Adenomera heyeri Boistel, Massary, and Angulo, 2006	2006
Anura	Leptodactylidae	Leptodactylinae	Adenomera	juikitam	Adenomera juikitam						NA	BR		Adenomera juikitam	FALSE	FALSE	FALSE	FALSE	FALSE	FALSE	FALSE	FALSE	FALSE	FALSE	FALSE	Adenomera juikitam Carvalho and Giaretta, 2013	2013
Anura	Leptodactylidae	Leptodactylinae	Adenomera	kweti	Adenomera kweti						NA	BR		Adenomera kweti	FALSE	FALSE	FALSE	FALSE	FALSE	FALSE	FALSE	FALSE	FALSE	FALSE	FALSE	Adenomera kweti Carvalho, Cassini, Taucce, and Haddad, 2019	2019
Anura	Leptodactylidae	Leptodactylinae	Adenomera	lutzi	Adenomera lutzi			Adenomera lutzi	Leptodactylus lutzi	Leptodactylus lutzi	Data Deficient (DD)	GY		Adenomera lutzi	FALSE	FALSE	FALSE	FALSE	FALSE	FALSE	FALSE	FALSE	FALSE	FALSE	FALSE	Adenomera lutzi Heyer, 1975	1975
Anura	Leptodactylidae	Leptodactylinae	Adenomera	marmorata	Adenomera marmorata			Adenomera marmorata	Leptodactylus marmoratus	Leptodactylus marmoratus	Least Concern (LC)	BR		Adenomera marmorata	FALSE	FALSE	FALSE	FALSE	FALSE	FALSE	FALSE	FALSE	FALSE	FALSE	FALSE	Adenomera marmorata Steindachner, 1867	1867
Anura	Leptodactylidae	Leptodactylinae	Adenomera	nana	Adenomera nana			Adenomera nana			Least Concern (LC)	BR		Adenomera nana	FALSE	FALSE	FALSE	FALSE	FALSE	FALSE	FALSE	FALSE	FALSE	FALSE	FALSE	Adenomera nana (Müller, 1922)	1922
Anura	Leptodactylidae	Leptodactylinae	Adenomera	saci	Adenomera saci						NA	BR		Adenomera saci	FALSE	FALSE	FALSE	FALSE	FALSE	FALSE	FALSE	FALSE	FALSE	FALSE	FALSE	Adenomera saci Carvalho and Giaretta, 2013	2013
Anura	Leptodactylidae	Leptodactylinae	Adenomera	simonstuarti	Adenomera simonstuarti				Leptodactylus simonstuarti		NA	BO,PE		Adenomera simonstuarti	FALSE	FALSE	FALSE	FALSE	FALSE	FALSE	FALSE	FALSE	FALSE	FALSE	FALSE	Adenomera simonstuarti (Angulo and Icochea, 2010)	2010
Anura	Leptodactylidae	Leptodactylinae	Adenomera	thomei	Adenomera thomei			Adenomera thomei			Least Concern (LC)	BR		Adenomera thomei	FALSE	FALSE	FALSE	FALSE	FALSE	FALSE	FALSE	FALSE	FALSE	FALSE	FALSE	Adenomera thomei (Almeida and Angulo, 2006)	2006
Anura	Bufonidae		Adenomus	kandianus	Adenomus kandianus			Adenomus kandianus	Adenomus dasi		Critically Endangered (CR)	LK	Rediscovered by Wickramasinghe and colleagues (Zootaxa 2012 3347:63-68). Status should be changed to Critically Endangered.	Adenomus kandianus	FALSE	FALSE	FALSE	FALSE	FALSE	FALSE	FALSE	FALSE	FALSE	FALSE	FALSE	Adenomus kandianus (Günther, 1872)	1872
Anura	Bufonidae		Adenomus	kelaartii	Adenomus kelaartii		Kelaart`s Dwarf Toad	Adenomus kelaartii			Endangered (EN)	LK		Adenomus kelaartii	FALSE	FALSE	FALSE	FALSE	FALSE	FALSE	FALSE	FALSE	FALSE	FALSE	FALSE	Adenomus kelaartii (Günther, 1858)	1858
Anura	Hyperoliidae		Afrixalus	aureus	Afrixalus aureus		Golden Dwarf Reed Frog, Golden Spiny Reed Frog	Afrixalus aureus	Afrixalus crotalus	Afrixalus crotalus	Least Concern (LC)	SZ,ZA,MZ		Afrixalus aureus	FALSE	FALSE	FALSE	FALSE	FALSE	FALSE	FALSE	FALSE	FALSE	FALSE	FALSE	Afrixalus aureus Pickersgill, 1984	1984
Anura	Hyperoliidae		Afrixalus	clarkei	Afrixalus clarkei			Afrixalus clarkei	Afrixalus clarkeorum	Afrixalus clarkeorum	Endangered (EN)	ET		Afrixalus clarkei	FALSE	FALSE	FALSE	FALSE	FALSE	FALSE	FALSE	FALSE	FALSE	FALSE	FALSE	Afrixalus clarkei Largen, 1974	1974
Anura	Hyperoliidae		Afrixalus	delicatus	Afrixalus delicatus		Delicate Spiny Reed Frog	Afrixalus delicatus			Least Concern (LC)	KE,MW,MZ,ZA,TZ		Afrixalus delicatus	FALSE	FALSE	FALSE	FALSE	FALSE	FALSE	FALSE	FALSE	FALSE	FALSE	FALSE	Afrixalus delicatus Pickersgill, 1984	1984
Anura	Hyperoliidae		Afrixalus	dorsimaculatus	Afrixalus dorsimaculatus			Afrixalus dorsimaculatus			Endangered (EN)	TZ		Afrixalus dorsimaculatus	FALSE	FALSE	FALSE	FALSE	FALSE	FALSE	FALSE	FALSE	FALSE	FALSE	FALSE	Afrixalus dorsimaculatus (Ahl, 1930)	1930
Anura	Hyperoliidae		Afrixalus	enseticola	Afrixalus enseticola			Afrixalus enseticola			Vulnerable (VU)	ET		Afrixalus enseticola	FALSE	FALSE	FALSE	FALSE	FALSE	FALSE	FALSE	FALSE	FALSE	FALSE	FALSE	Afrixalus enseticola Largen, 1974	1974
Anura	Hyperoliidae		Afrixalus	knysnae	Afrixalus knysnae		Knysna Spiny Reed Frog	Afrixalus knysnae			Endangered (EN)	ZA		Afrixalus knysnae	FALSE	FALSE	FALSE	FALSE	FALSE	FALSE	FALSE	FALSE	FALSE	FALSE	FALSE	Afrixalus knysnae (Loveridge, 1954)	1954
Anura	Hyperoliidae		Afrixalus	lacteus	Afrixalus lacteus			Afrixalus lacteus			Endangered (EN)	CM		Afrixalus lacteus	FALSE	FALSE	FALSE	FALSE	FALSE	FALSE	FALSE	FALSE	FALSE	FALSE	FALSE	Afrixalus lacteus Perret, 1976	1976
Anura	Hyperoliidae		Afrixalus	leucostictus	Afrixalus leucostictus			Afrixalus leucostictus			Least Concern (LC)	CD		Afrixalus leucostictus	FALSE	FALSE	FALSE	FALSE	FALSE	FALSE	FALSE	FALSE	FALSE	FALSE	FALSE	Afrixalus leucostictus Laurent, 1950	1950
Anura	Hyperoliidae		Afrixalus	lindholmi	Afrixalus lindholmi			Afrixalus lindholmi			Data Deficient (DD)	CM		Afrixalus lindholmi	FALSE	FALSE	FALSE	FALSE	FALSE	FALSE	FALSE	FALSE	FALSE	FALSE	FALSE	Afrixalus lindholmi (Andersson, 1907)	1907
Anura	Hyperoliidae		Afrixalus	morerei	Afrixalus morerei			Afrixalus morerei			Vulnerable (VU)	TZ		Afrixalus morerei	FALSE	FALSE	FALSE	FALSE	FALSE	FALSE	FALSE	FALSE	FALSE	FALSE	FALSE	Afrixalus morerei Dubois, 1986	1986
Anura	Hyperoliidae		Afrixalus	nigeriensis	Afrixalus nigeriensis			Afrixalus nigeriensis			Least Concern (LC)	CI,GH,GN,NG		Afrixalus nigeriensis	FALSE	FALSE	FALSE	FALSE	FALSE	FALSE	FALSE	FALSE	FALSE	FALSE	FALSE	Afrixalus nigeriensis Schiøtz, 1963	1963
Anura	Hyperoliidae		Afrixalus	quadrivittatus	Afrixalus quadrivittatus			Afrixalus quadrivittatus			Least Concern (LC)	CG,ET,KE,SS,TZ		Afrixalus quadrivittatus	FALSE	FALSE	FALSE	FALSE	FALSE	FALSE	FALSE	FALSE	FALSE	FALSE	FALSE	Afrixalus quadrivittatus (Werner, 1908)	1908
Anura	Hyperoliidae		Afrixalus	schneideri	Afrixalus schneideri			Afrixalus schneideri			Data Deficient (DD)	CM		Afrixalus schneideri	FALSE	FALSE	FALSE	FALSE	FALSE	FALSE	FALSE	FALSE	FALSE	FALSE	FALSE	Afrixalus schneideri (Boettger, 1889)	1889
Anura	Hyperoliidae		Afrixalus	spinifrons	Afrixalus spinifrons		Natal Spiny Reed Frog	Afrixalus spinifrons			Least Concern (LC)	ZA		Afrixalus spinifrons	FALSE	FALSE	FALSE	FALSE	FALSE	FALSE	FALSE	FALSE	FALSE	FALSE	FALSE	Afrixalus spinifrons (Cope, 1862)	1862
Anura	Hyperoliidae		Afrixalus	uluguruensis	Afrixalus uluguruensis			Afrixalus uluguruensis			Vulnerable (VU)	TZ		Afrixalus uluguruensis	FALSE	FALSE	FALSE	FALSE	FALSE	FALSE	FALSE	FALSE	FALSE	FALSE	FALSE	Afrixalus uluguruensis (Barbour and Loveridge, 1928)	1928
Anura	Hyperoliidae		Afrixalus	upembae	Afrixalus upembae			Afrixalus upembae			Data Deficient (DD)	CD		Afrixalus upembae	FALSE	FALSE	FALSE	FALSE	FALSE	FALSE	FALSE	FALSE	FALSE	FALSE	FALSE	Afrixalus upembae (Laurent, 1941)	1941
Anura	Hyperoliidae		Afrixalus	vibekensis	Afrixalus vibekensis			Afrixalus vibekensis			Near Threatened (NT)	CI,GH,GN		Afrixalus vibekensis	FALSE	FALSE	FALSE	FALSE	FALSE	FALSE	FALSE	FALSE	FALSE	FALSE	FALSE	Afrixalus vibekensis Schiøtz, 1967	1967
Anura	Hyperoliidae		Afrixalus	vittiger	Afrixalus vittiger			Afrixalus vittiger			Least Concern (LC)	BJ,BF,GM,GH,ML,NG,SN		Afrixalus vittiger	FALSE	FALSE	FALSE	FALSE	FALSE	FALSE	FALSE	FALSE	FALSE	FALSE	FALSE	Afrixalus vittiger (Peters, 1876)	1876
Anura	Hyperoliidae		Afrixalus	weidholzi	Afrixalus weidholzi			Afrixalus weidholzi			Least Concern (LC)	BJ,CM,CD,CI,GM,GH,GN,NG,SN,SS		Afrixalus weidholzi	FALSE	FALSE	FALSE	FALSE	FALSE	FALSE	FALSE	FALSE	FALSE	FALSE	FALSE	Afrixalus weidholzi (Mertens, 1938)	1938
Anura	Hyperoliidae		Afrixalus	wittei	Afrixalus wittei		De Witte's spiny reed frog	Afrixalus wittei			Least Concern (LC)	AO,CD,TZ,ZM		Afrixalus wittei	FALSE	FALSE	FALSE	FALSE	FALSE	FALSE	FALSE	FALSE	FALSE	FALSE	FALSE	Afrixalus wittei (Laurent, 1941)	1941
Anura	Hylidae	Phyllomedusinae	Agalychnis	buckleyi	Agalychnis buckleyi		Warty Leaf Frog, Rana mono de Buckley	Agalychnis buckleyi	Agalychnis buckleyi, Hylomantis buckleyi, Phyllomedusa buckleyi	Phyllomedusa buckleyi	Least Concern (LC)	CO,EC		Agalychnis buckleyi	FALSE	FALSE	FALSE	FALSE	FALSE	FALSE	FALSE	FALSE	FALSE	FALSE	FALSE	Agalychnis buckleyi (Boulenger, 1882)	1882
Anura	Hylidae	Phyllomedusinae	Agalychnis	danieli	Agalychnis danieli		Antioquia Leaf Frog	Agalychnis danieli	Hylomantis danieli, Phyllomedusa danieli	Phyllomedusa danieli	Data Deficient (DD)	CO		Agalychnis danieli	FALSE	FALSE	FALSE	FALSE	FALSE	FALSE	FALSE	FALSE	FALSE	FALSE	FALSE	Agalychnis danieli (Ruiz-Carranza, Hernández-Camacho, and Rueda-Almonacid, 1988)	1988
Anura	Hylidae	Phyllomedusinae	Agalychnis	hulli	Agalychnis hulli			Agalychnis hulli	Phyllomedusa hulli	Phyllomedusa hulli	Least Concern (LC)	EC,PE		Agalychnis hulli	FALSE	FALSE	FALSE	FALSE	FALSE	FALSE	FALSE	FALSE	FALSE	FALSE	FALSE	Agalychnis hulli (Duellman and Mendelson, 1995)	1995
Anura	Hylidae	Phyllomedusinae	Agalychnis	psilopygion	Agalychnis psilopygion			Agalychnis psilopygion	Hylomantis psilopygion, Phyllomedusa psilopygion	Phyllomedusa psilopygion	Data Deficient (DD)	CO		Agalychnis psilopygion	FALSE	FALSE	FALSE	FALSE	FALSE	FALSE	FALSE	FALSE	FALSE	FALSE	FALSE	Agalychnis psilopygion (Cannatella, 1980)	1980
Anura	Hylidae	Phyllomedusinae	Agalychnis	terranova	Agalychnis terranova			Agalychnis terranova			Near Threatened (NT)	CO		Agalychnis terranova	FALSE	FALSE	FALSE	FALSE	FALSE	FALSE	FALSE	FALSE	FALSE	FALSE	FALSE	Agalychnis terranova Rivera-Correa, Duarte-Cubides, Rueda-Almonacid, and Daza-R., 2013	2013
Anura	Mantellidae	Laliostominae	Aglyptodactylus	australis	Aglyptodactylus australis			Aglyptodactylus australis			Endangered (EN)	MG		Aglyptodactylus australis	FALSE	FALSE	FALSE	FALSE	FALSE	FALSE	FALSE	FALSE	FALSE	FALSE	FALSE	Aglyptodactylus australis Köhler, Glaw, Pabijan, and Vences, 2015	2015
Anura	Mantellidae	Laliostominae	Aglyptodactylus	chorus	Aglyptodactylus chorus			Aglyptodactylus chorus			Near Threatened (NT)	MG		Aglyptodactylus chorus	FALSE	FALSE	FALSE	FALSE	FALSE	FALSE	FALSE	FALSE	FALSE	FALSE	FALSE	Aglyptodactylus chorus Köhler, Glaw, Pabijan, and Vences, 2015	2015
Anura	Mantellidae	Laliostominae	Aglyptodactylus	inguinalis	Aglyptodactylus inguinalis			Aglyptodactylus inguinalis			Least Concern (LC)	MG		Aglyptodactylus inguinalis	FALSE	FALSE	FALSE	FALSE	FALSE	FALSE	FALSE	FALSE	FALSE	FALSE	FALSE	Aglyptodactylus inguinalis Günther, 1877	1877
Anura	Mantellidae	Laliostominae	Aglyptodactylus	laticeps	Aglyptodactylus laticeps			Aglyptodactylus laticeps			Vulnerable (VU)	MG		Aglyptodactylus laticeps	FALSE	FALSE	FALSE	FALSE	FALSE	FALSE	FALSE	FALSE	FALSE	FALSE	FALSE	Aglyptodactylus laticeps Glaw, Vences, and Böhme, 1998	1998
Anura	Mantellidae	Laliostominae	Aglyptodactylus	madagascariensis	Aglyptodactylus madagascariensis			Aglyptodactylus madagascariensis			Least Concern (LC)	MG		Aglyptodactylus madagascariensis	FALSE	FALSE	FALSE	FALSE	FALSE	FALSE	FALSE	FALSE	FALSE	FALSE	FALSE	Aglyptodactylus madagascariensis (Duméril, 1853)	1853
Anura	Mantellidae	Laliostominae	Aglyptodactylus	securifer	Aglyptodactylus securifer			Aglyptodactylus securifer			Least Concern (LC)	MG		Aglyptodactylus securifer	FALSE	FALSE	FALSE	FALSE	FALSE	FALSE	FALSE	FALSE	FALSE	FALSE	FALSE	Aglyptodactylus securifer Glaw, Vences, and Böhme, 1998	1998
Anura	Ceratobatrachidae	Alcalinae	Alcalus	baluensis	Alcalus baluensis			Alcalus baluensis			Least Concern (LC)	MY		Alcalus baluensis	FALSE	FALSE	FALSE	FALSE	FALSE	FALSE	FALSE	FALSE	FALSE	FALSE	FALSE	Alcalus baluensis (Boulenger, 1896)	1896
Anura	Ceratobatrachidae	Alcalinae	Alcalus	mariae	Alcalus mariae			Alcalus mariae			Data Deficient (DD)	PH		Alcalus mariae	FALSE	FALSE	FALSE	FALSE	FALSE	FALSE	FALSE	FALSE	FALSE	FALSE	FALSE	Alcalus mariae (Inger, 1954)	1954
Anura	Ceratobatrachidae	Alcalinae	Alcalus	rajae	Alcalus rajae						NA	ID		Alcalus rajae	FALSE	FALSE	FALSE	FALSE	FALSE	FALSE	FALSE	FALSE	FALSE	FALSE	FALSE	Alcalus rajae (Iskandar, Bickford, and Arifin, 2011)	2011
Anura	Ceratobatrachidae	Alcalinae	Alcalus	sariba	Alcalus sariba						NA	MY		Alcalus sariba	FALSE	FALSE	FALSE	FALSE	FALSE	FALSE	FALSE	FALSE	FALSE	FALSE	FALSE	Alcalus sariba (Shelford, 1905)	1905
Anura	Ceratobatrachidae	Alcalinae	Alcalus	tasanae	Alcalus tasanae		Tha San Dwarf Cascadefrog	Alcalus tasanae			Vulnerable (VU)	MM,TH		Alcalus tasanae	FALSE	FALSE	FALSE	FALSE	FALSE	FALSE	FALSE	FALSE	FALSE	FALSE	FALSE	Alcalus tasanae (Smith, 1921)	1921
Anura	Hyperoliidae		Alexteroon	hypsiphonus	Alexteroon hypsiphonus			Alexteroon hypsiphonus			Least Concern (LC)	CM,CG,GA		Alexteroon hypsiphonus	FALSE	FALSE	FALSE	FALSE	FALSE	FALSE	FALSE	FALSE	FALSE	FALSE	FALSE	Alexteroon hypsiphonus Amiet, 2000	2000
Anura	Hyperoliidae		Alexteroon	jynx	Alexteroon jynx			Alexteroon jynx			Critically Endangered (CR)	CM		Alexteroon jynx	FALSE	FALSE	FALSE	FALSE	FALSE	FALSE	FALSE	FALSE	FALSE	FALSE	FALSE	Alexteroon jynx Amiet, 2000	2000
Anura	Hyperoliidae		Alexteroon	obstetricans	Alexteroon obstetricans			Alexteroon obstetricans			Least Concern (LC)	CM,GA		Alexteroon obstetricans	FALSE	FALSE	FALSE	FALSE	FALSE	FALSE	FALSE	FALSE	FALSE	FALSE	FALSE	Alexteroon obstetricans (Ahl, 1931)	1931
Anura	Dendrobatidae	Aromobatinae	Allobates	alessandroi	Allobates alessandroi			Allobates alessandroi	Colostethus alessandroi	Colostethus alessandroi	Data Deficient (DD)	PE		Allobates alessandroi	FALSE	FALSE	FALSE	FALSE	FALSE	FALSE	FALSE	FALSE	FALSE	FALSE	FALSE	Hyloxalus alessandroi (Grant and Rodriguez, 2001)	2001
Anura	Dendrobatidae	Aromobatinae	Allobates	algorei	Allobates algorei		Spotted nurse frog, Sapito niÃÆÃÂ±era moteado	Allobates algorei			Least Concern (LC)	VE		Allobates algorei	FALSE	FALSE	FALSE	FALSE	FALSE	FALSE	FALSE	FALSE	FALSE	FALSE	FALSE	Allobates algorei Barrio-Amorós and Santos, 2009	2009
Anura	Dendrobatidae	Aromobatinae	Allobates	amissibilis	Allobates amissibilis						NA	GY		Allobates amissibilis	FALSE	FALSE	FALSE	FALSE	FALSE	FALSE	FALSE	FALSE	FALSE	FALSE	FALSE	Allobates amissibilis Kok, Hölting, and Ernst, 2013	2013
Anura	Dendrobatidae	Aromobatinae	Allobates	bacurau	Allobates bacurau						NA	BR		Allobates bacurau	FALSE	FALSE	FALSE	FALSE	FALSE	FALSE	FALSE	FALSE	FALSE	FALSE	FALSE	Allobates bacurau Simões, 2016	2016
Anura	Dendrobatidae	Aromobatinae	Allobates	bromelicola	Allobates bromelicola			Allobates bromelicola	Colostethus bromelicola	Colostethus bromelicola	Data Deficient (DD)	VE		Allobates bromelicola	FALSE	FALSE	FALSE	FALSE	FALSE	FALSE	FALSE	FALSE	FALSE	FALSE	FALSE	Allobates bromelicola (Test, 1956)	1956
[truncated: 6,928 more rows]
