# Supplementary material for: Gaps in global wildlife trade monitoring leave amphibians vulnerable
Source: eLife. 2021 Aug 12;10:e70086. doi: 10.7554/eLife.70086 (PMC8425949; doi:10.7554/eLife.70086)
Supplement: Source data 11. [file elife-70086-data11.csv]

field	detail
order_	[from AmphibiaWeb] Species classification - order
family	[from AmphibiaWeb] Not used
subfamily	[from AmphibiaWeb] Not used
genus	[from AmphibiaWeb] Species classification - genus
species	[from AmphibiaWeb] Species classification - species
genus_spec	[from AmphibiaWeb] Species classification - combined genus and species
subgenus	[from AmphibiaWeb] Not used
common_nam	[from AmphibiaWeb] Species common name (if any)
gaa_name	[from AmphibiaWeb] Not used
synonymies	[from AmphibiaWeb] Character string of other names
itis_names	[from AmphibiaWeb] Not used
iucn	[from AmphibiaWeb] IUCN Redlist status
isocc	[from AmphibiaWeb] isocc two letter country code
taxon_note	[from AmphibiaWeb] Not used
amphiName	the name carried forward as the backbone taxonomy, generated from species and genus fields
onlineSnap	whether the species was detected as traded in contemporary online searches
onlineTemp	whether the species was detected as traded in temporal online searches
onlineEither	whether the species was detected as traded in either online trade searches
lemisTrade	whether the species was listed as traded in LEMIS database
citesTrade	whether the species was listed as traded in CITES database
anyTrade	whether the species was detected as traded via online, LEMIS or CITES data sources
citesList	whether the species is regulated in some form by CITES
citesApp	what CITES appendix it is listed under
mohantyTrade	whether the species was detected by Mohanty and Measey 2019
iucnTrade	whether the species is described as traded in the IUCN database
anyTrade_extra	whether the species is described or detected as traded by ANY data source
speciesAuthority	full text on the species authority from ANHM
descYear	year described as extracted from species authority
