# Supplementary figures and images for: Gaps in global wildlife trade monitoring leave amphibians vulnerable
Source: eLife journal article supplement (doi:10.7554/elife.70086), 2021-08-12

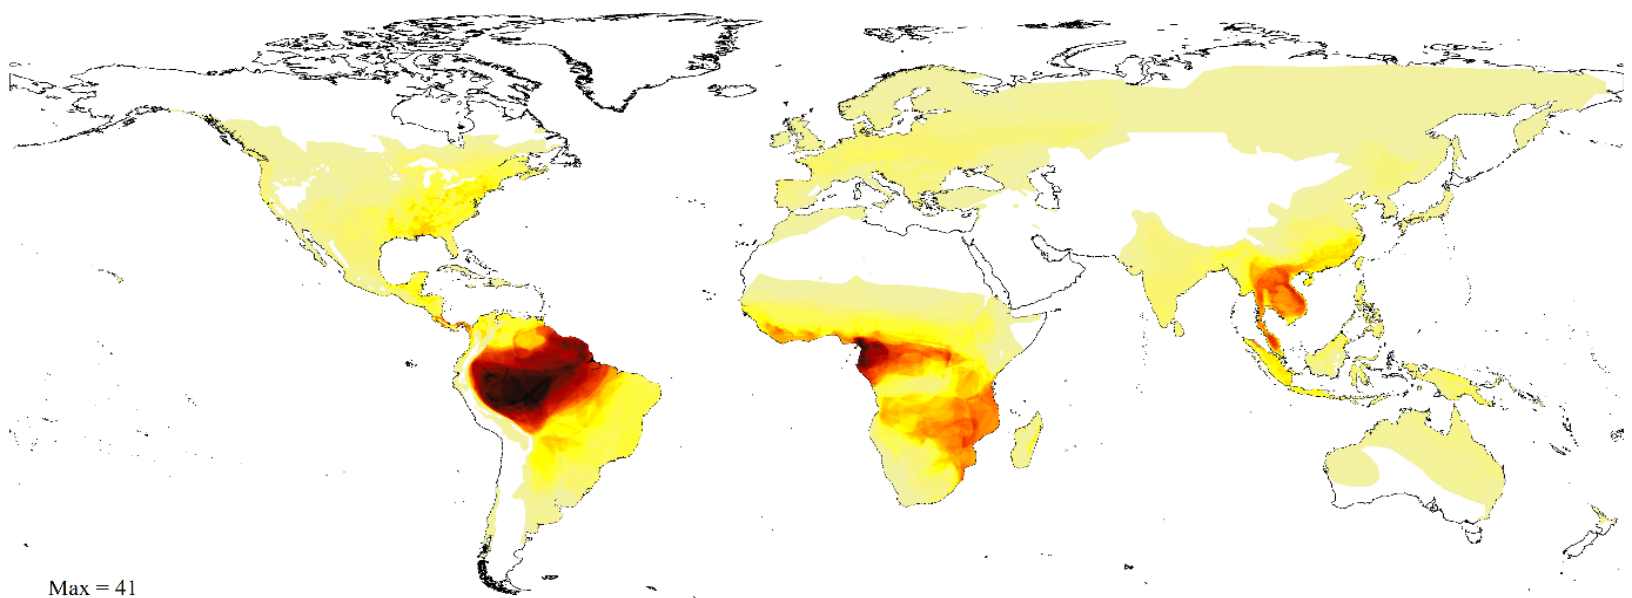

a. LEMIS

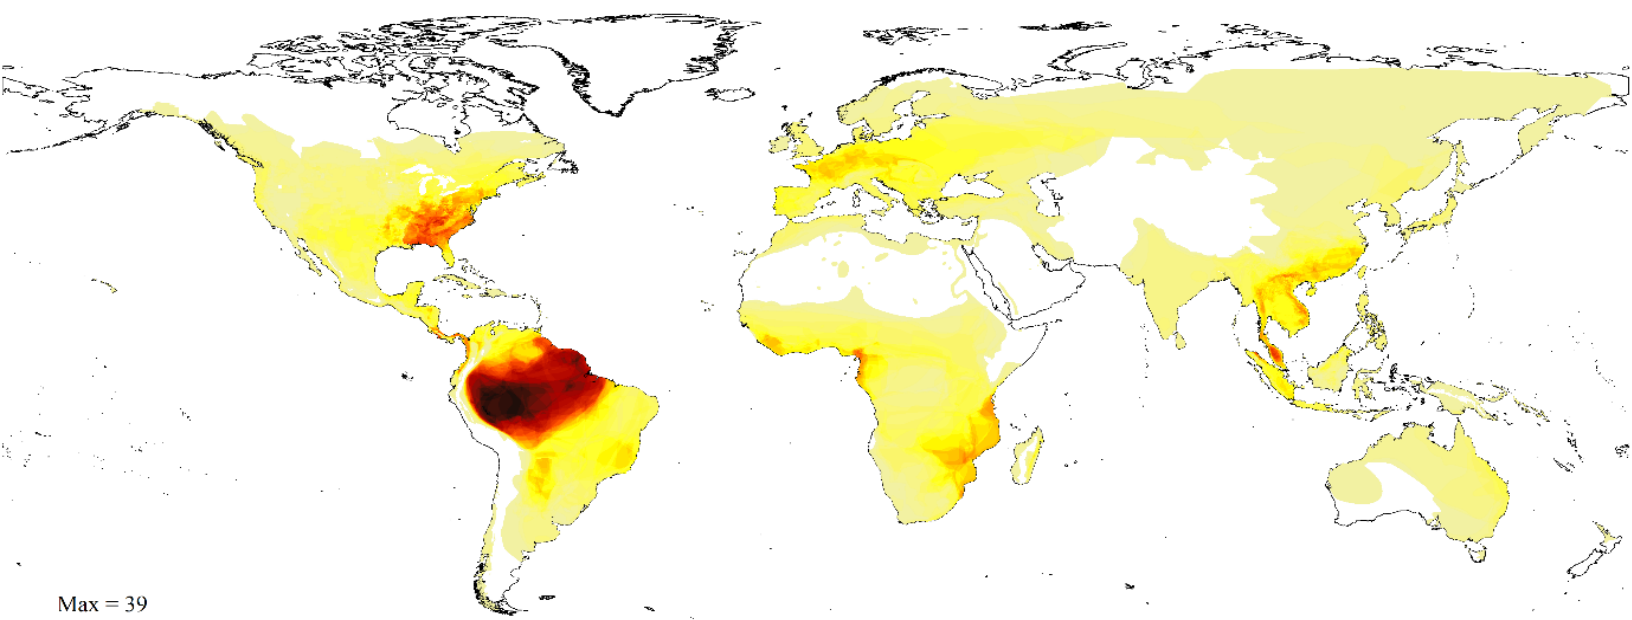

b. Online

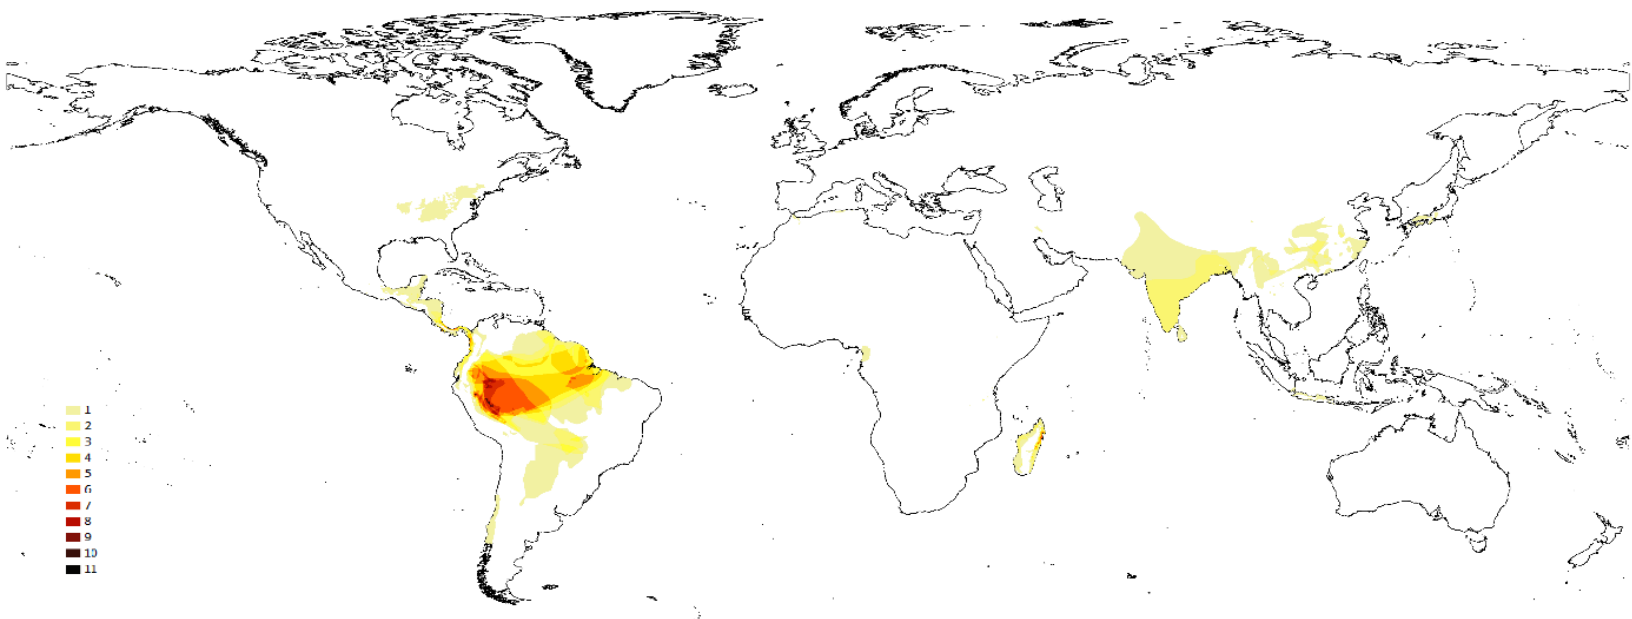

c. CITES

Supplement: supp [file elife-70086-supp-v1.zip]

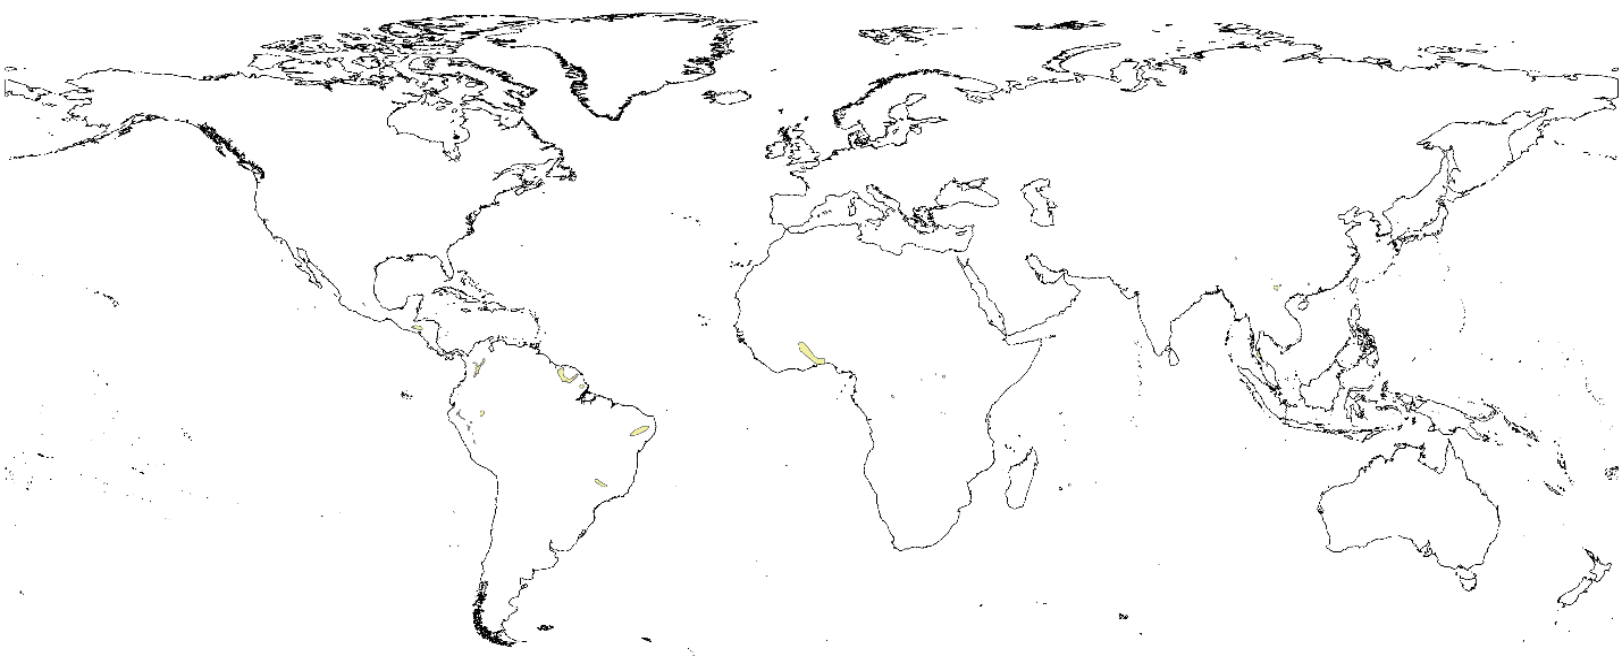

a.

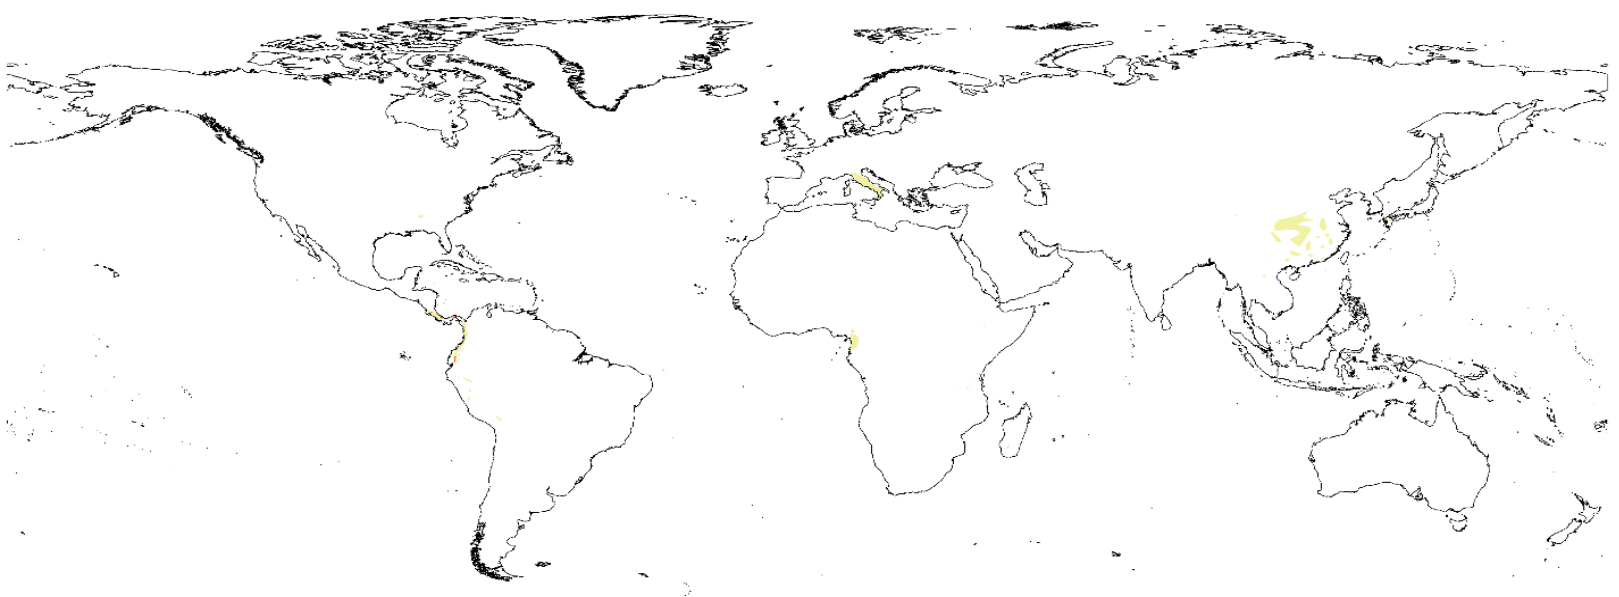

b.

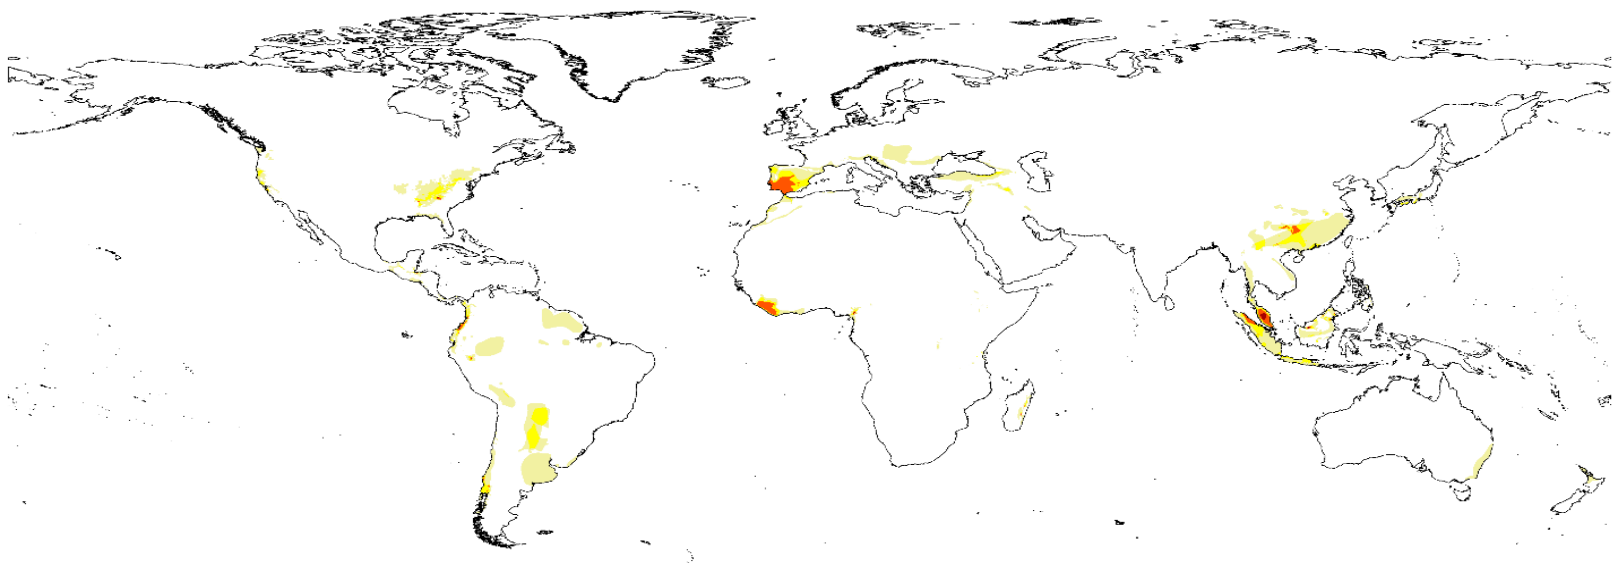

c.

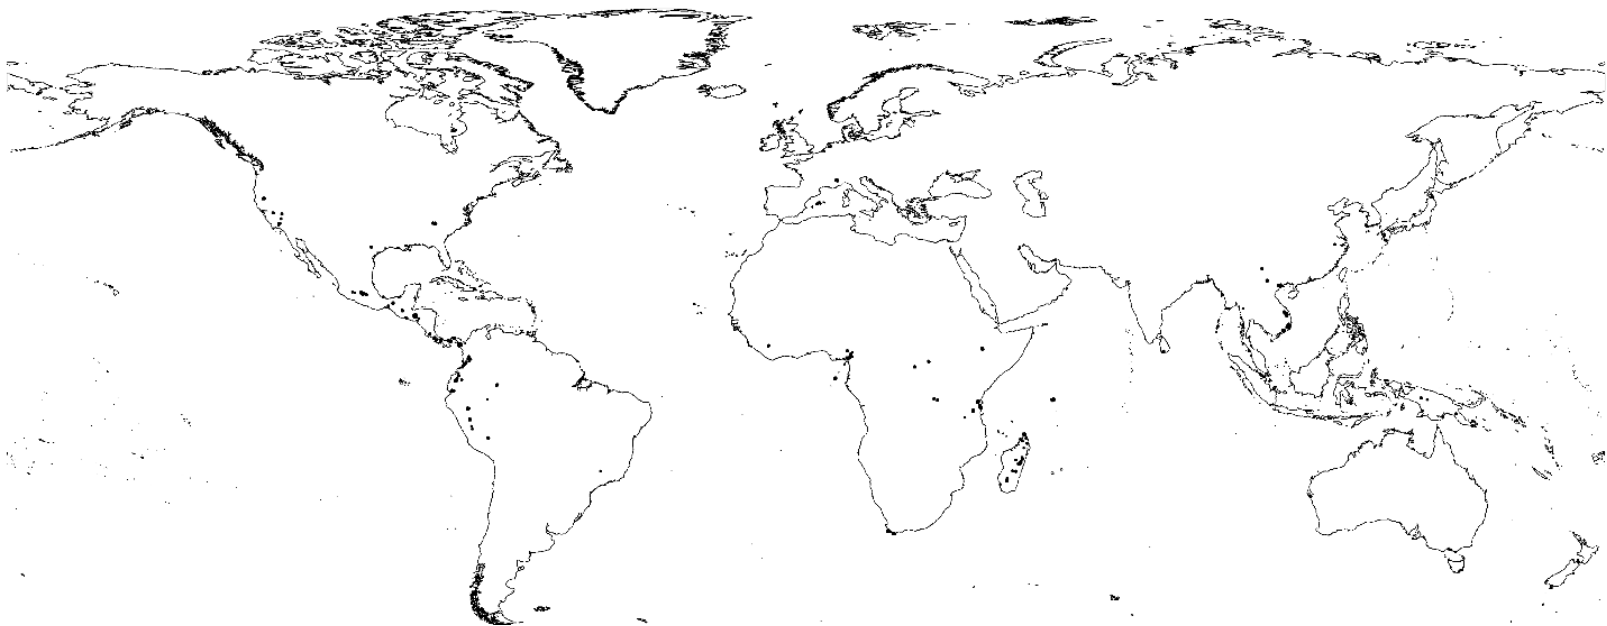

d.

Supplement: supp [file elife-70086-supp-v1.zip]

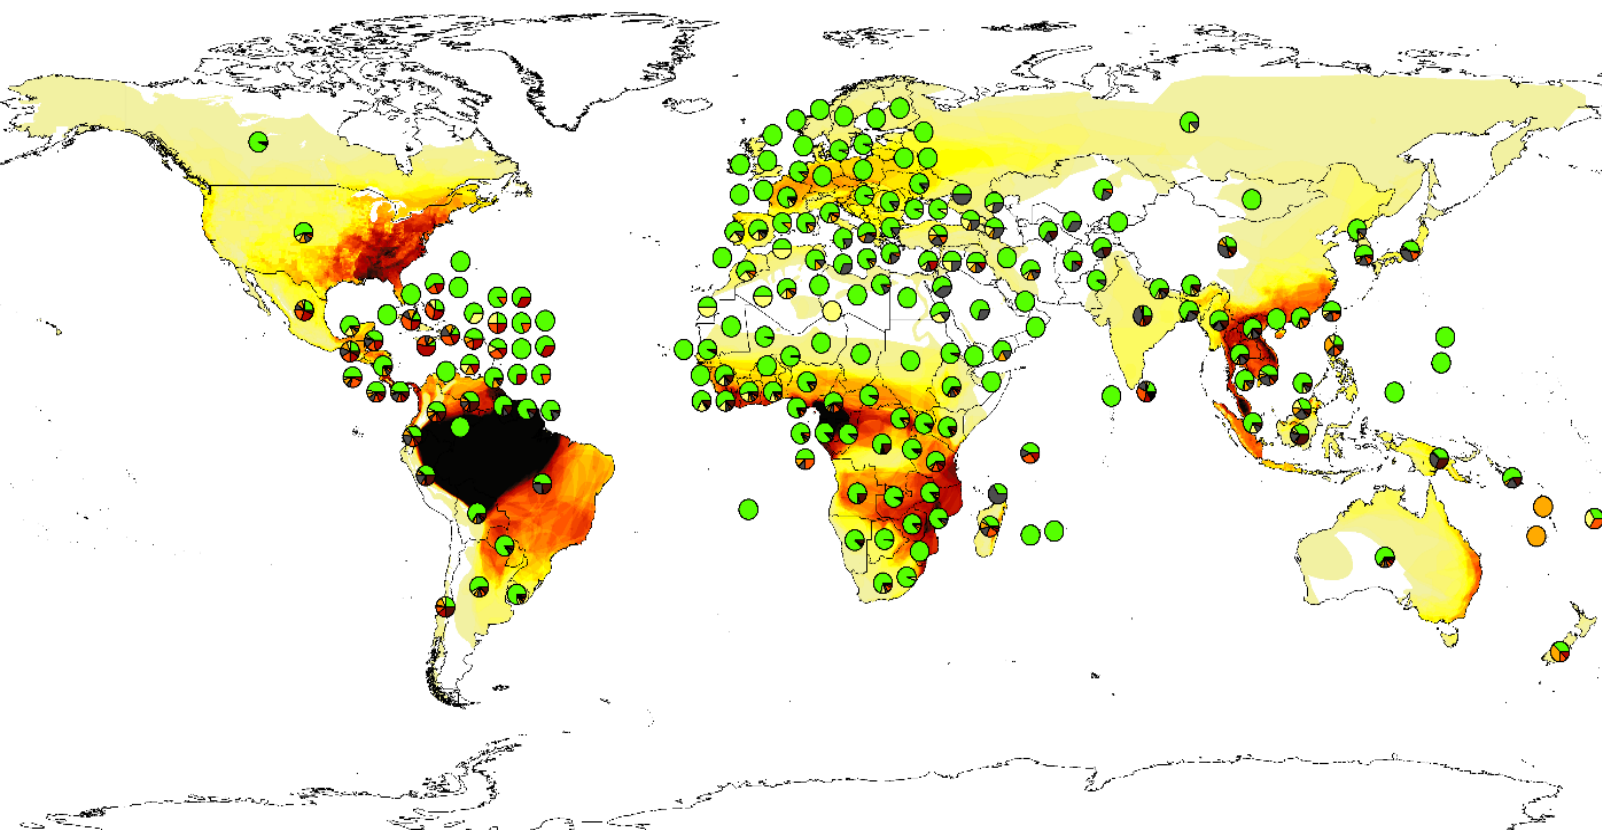

a

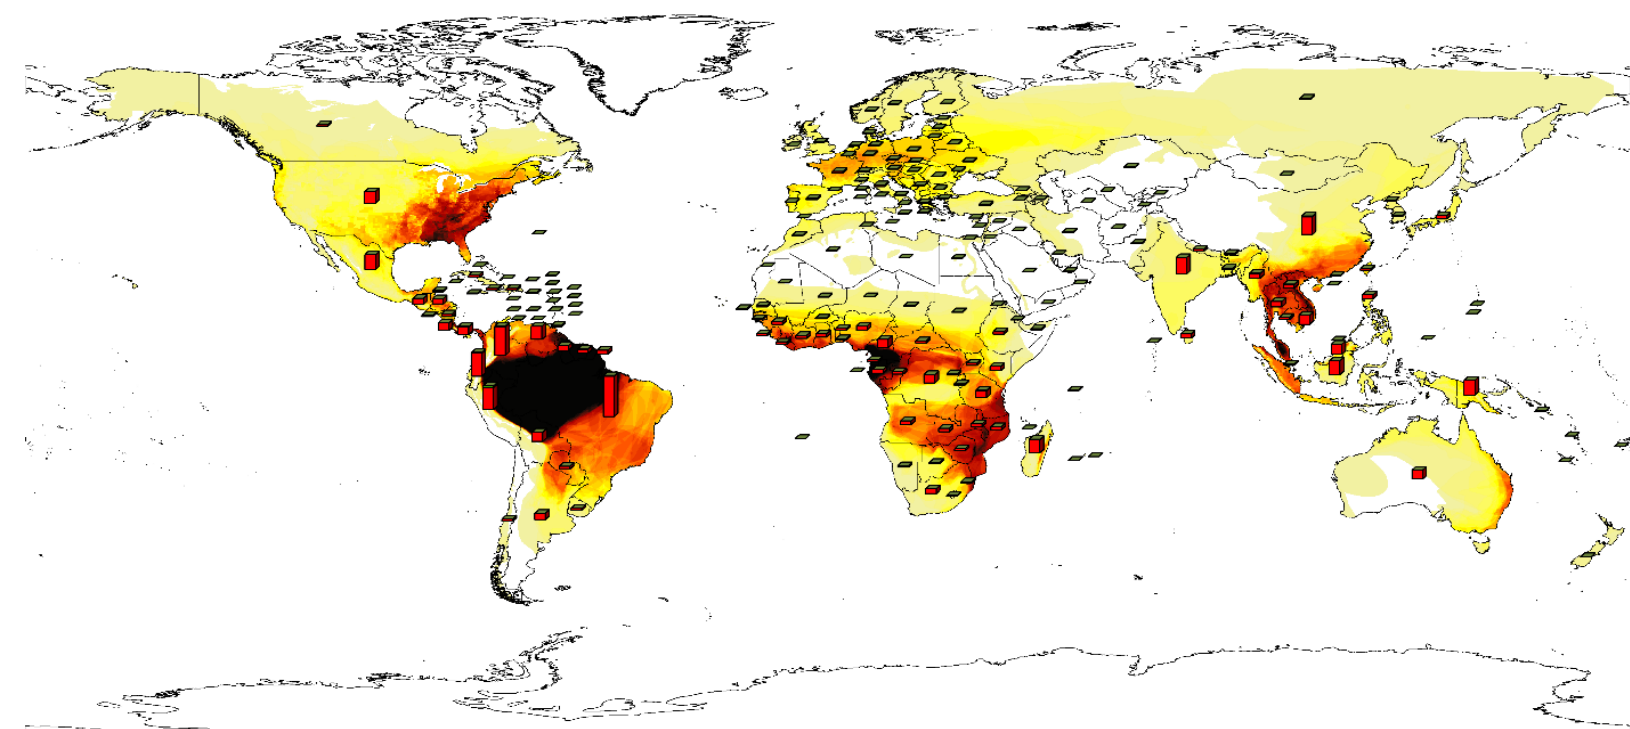

b

Supplement: supp [file elife-70086-supp-v1.zip]
